# Supplementary material for: Reference-free transcriptome exploration reveals novel RNAs for prostate cancer diagnosis
Source: Life Sci Alliance. 2019 Nov 15;2(6):e201900449. doi: 10.26508/lsa.201900449 (PMC6858606; doi:10.26508/lsa.201900449)
Supplement: Supplementary file 1 [file LSA-2019-00449_TableS1.xlsx]

## Sheet: Sheet1
Table S1. Clinico-pathological characteristics and recurrence status of the prostate specimens used for the total stranded RNA-sequencing (PAIR, Discovery Set).
Sample_ID	tissue type	Gleason score	TMN score	risk group, naïve classification	recurrence	RNAseq_ID
HMN_PC_102	tumor	6 (3 + 3)	pT2a	low	no	B67T18
HMN_PC_228	tumor	6 (3 + 3)	pT2a	low	no	B67T19
HMN_PC_089	tumor	7 (3 + 4)	pT2c	low	no	B67T20
HMN_PC_167	tumor	8 (4 + 4)	pT2c	high	no	B67T22
HMN_PC_077	tumor	7 (3 + 4)	pT3a	intermediate	no	B65T1
HMN_PC_092	tumor	7 (4 + 3)	pT3a	intermediate	no	B65T3
HMN_PC_124	tumor	8 (4 + 4)	pT3a	high	yes	B65T5
HMN_PC_131	tumor	8 (4 + 4)	pT3a	high	yes	B65T7
HMN_PC_195	tumor	8 (4 + 4)	pT3a	high	no	B67T11
HMN_PC_139	tumor	6 (3 + 3)	pT3a	intermediate	yes	B67T17
HMN_PC_033	tumor	7 (3 + 4)	pT3a	intermediate	no	B67T21
HMN_PC_085	tumor	7 (4 + 3)	pT3b	high	no	B67T12
HMN_PC_121	tumor	8 (4 + 4)	pT3b	high	yes	B67T23
HMN_PC_009	tumor	8 (4 + 4)	pT3b	high	no	B67T24
HMN_PC_148	tumor	8 (4 + 4)	pT4	high	yes	B67T9
HMN_PC_130	tumor	6 (3 + 3)	pT4	high	yes	B67T16
HMN_PC_78(-)	normal					B65T2
HMN_PC_093(-)	normal					B65T4
HMN_PC_125(-)	normal					B65T6
HMN_PC_132(-)	normal					B65T8
HMN_PC_149(-)	normal					B67T10
HMN_PC_202(-)	normal					B67T13
HMN_PC_086(-)	normal					B67T14
HMN_PC_061(-)	normal					B67T15
