# Supplementary material for: Reference-free transcriptome exploration reveals novel RNAs for prostate cancer diagnosis
Source: Life Sci Alliance. 2019 Nov 15;2(6):e201900449. doi: 10.26508/lsa.201900449 (PMC6858606; doi:10.26508/lsa.201900449)
Supplement: Supplementary file 2 [file LSA-2019-00449_TableS2.xlsx]

## Sheet: summary
Table S2. PCa contigs catalog generated by DE-kupl. Only contigs with the length above 200 nucleotides and adjusted p-value of DE below 0.01 were retained for this study.
	total	intergenic	antisense	overlapping	NA
contiguous	935	291	206	438	0
spliced	54	7	8	39	0
repeat	167	60	1	106	0
unmapped	23	12	6	3	2
Total	1179	370	221	586	2

## Sheet: contiguous_contigs
LineInSam	contig	size	chromosome	start	end	strand	HUGO_ID_gene	HUGO_ID_as_gene	meanA	meanB	pvalue	log2FC	B67T15	B67T14	B67T13	B67T10	B65T8	B65T6	B65T4	B65T2	B65T3	B65T1	B67T11	B67T12	B67T18	B67T19	B67T20	B67T21	B67T22	B67T24	B65T5	B65T7	B67T16	B67T9	B67T17	B67T23
22349	ACACAGAACAGGAATATCAGGTAATGAAAATGTTCTTTTGGTATAGTATTATGTTTTATGCTTTGAAAGTATTAGTATGCAAGGAACTCAGGCAAGAGCATAAAAGAGGAAGTAGGAATAATACTTTATGTTTGAATAGGCTTTAGACTTTCCAAAATACTTACATCCTACTGAAGCTTGGTAGCAAGTATTATCCTTGTTTTATTGATGAAAAACATGCTTCCAAGAAAGATGCATTACAAGCGA	246	chr5	68325198	68325443	-	7SK	none	3.86745	15.7002	0.000578847	1.73282	0	3.62305	4.82914	2.58533	2.64467	10.5874	6.67005	0	24.6209	13.6097	9.3218	12.8793	26.8241	9.44743	15.6793	5.80182	17.0149	12.1272	33.8209	31.7497	16.1745	10.482	3.94147	7.70859
37140	TGGATCCCCAAAGCCAGTGCCTTTTTTGAGCAGCAAGTCCCAAGATCAAGAAATCAGAAGGAACTAATACTTTAACTAATTAGTAGTAATGAAAATTTACTAGACATCAATGACAAATTTACAAGGCAAATTTATTTCCAAAGTACATTCATATATATCACAGGTAAAATGAGGTTTTCACAAACACCATTTTAAACATAGGGTTTATTTGCAGGAGCTATTTTTGTGGCTTAGGG	236	chr5	68325542	68325777	-	7SK	none	7.37792	23.0296	0.00284149	1.49488	20.5546	2.41537	6.76079	5.17067	6.17091	7.5624	7.50381	2.88486	12.3104	7.56095	4.14302	12.8793	51.3156	28.3423	25.261	11.6036	14.1791	33.0741	42.0476	45.1179	31.3382	26.205	10.2478	12.8476
105412	TATGAGAATTTGCATTTGCATCAAAACGGTGAGTACAGAATCATTTTCAGTGATTACTGTGCACACTCAAAGTTATGCTTCTGCCTTTAAGCGTTGAACATTCAGCAATTATTTACTGAAAACATACTTGCCAAACCCTGATCCGCATTCCTGAGGAAATAAGGATTCACATGTGAGAGTCATCTGGCAGCAGGCAGAAGAAGTGGAGGGGAATGCCCATAGAAGCCTAGAGCCTTTTCAGATTTCTCACTCTCCACAGGCTGCCCTTGCCTGAAATTAATCCTTCCATGGTCCCACCCTGTCCTTTTATGTTTTGGTCCTTAGGAAAATAAGCCCCGTGTCAGGGTTCAGTTTCTATAAGATCTTTTCCCTGTCCCTTTCATAGACGGAGTGCCAGAA…	803	chr4	106472578	106473377	-	AC004066.3	none	1.91042	24.0746	2.77915e-09	3.05959	0	2.41537	3.86331	0	2.64467	3.02496	3.33503	0	59.6583	12.0975	37.2872	23.417	59.4794	29.6919	40.9403	9.42796	14.1791	14.3321	11.883	19.2169	16.1745	8.38559	11.0361	17.9867
74373	GGTAAATCAAAGTGAAAGAAGTCATTAAGTCAGGTAACAAATACTTATCAAGTGCCTGTTGTTTGCTGGACATAGCAGGAGTGCTCCCAGGCAAGGAATAGACACCTATTTTTCAGACTTCTGATCTCTTTGGGGATTGCCAAAATGACCTCAAGTAGTGAAGATATAGTGGAATAATCTGTATTTCTGCTGACCTTGATGACATTTGG	209	chr4	106462426	106462634	-	AC004066.3	none	6.52634	31.9578	4.29305e-09	2.13139	5.87273	7.24611	7.72662	3.44711	6.17091	6.80616	9.17132	5.76973	21.78	17.3902	48.6805	37.4671	61.812	43.1883	33.1007	16.6802	36.8657	45.2013	25.5942	35.0917	27.2946	28.3014	11.0361	21.841
36867	GGCTTATTTACCTCTAAAATATAAAAGGAATTTTTTGGATTTATGTCAAAATGCCTCAATTGTGTTCGAATATTATATATGTATGAATGTATGTATGCATATACACACTTATTTATATTCACCTGGTAACCACCAGGGATTTATTTAGATACGGTATCACTGAAAAAAAAAGTTCAATTAAAACTACAGGACTTAATGGGTAACATGAGGTTTAGGACAGAGCACTCAGAAACTTTGTCAATGGACCATAAAAATCAGATCAAGACCTAATAAAAATGGTAGCAAGAATTTACACATGATAAATGCTTAAGAAATGCATAAATACTACAGCAAATATAACCCTTTATCTTGAAAAAGACACGGCATTTGCTTGTGGAAATGGGCCTCAGAAAGGTCACA…	485	chr4	106471928	106472412	-	AC004066.3	none	1.66817	16.0821	1.06007e-08	2.73711	0	0	2.89748	1.72356	1.76312	5.29368	1.66751	0	16.0983	12.0975	33.1442	22.2461	17.494	13.4963	29.6164	8.70274	16.0696	5.51236	9.14078	15.0393	19.2073	19.9158	11.8244	7.70859
123090	GAACAATCTTCTATTCAATCAGGGAATCAGGCAGACACTGTTGGTTGCTTACTTGGTCTTCATTTTTACCGCCTCCTACCCCCATGCTATTCTTTGCCAACAGAACCCTTCTCTTGTTCAAGGCAGCATTAGTCTTAGCCAATCAACGATAATCTTTTTTCCTATTTTTTTTCTATCTCCCTTTCTCTTAGGGTTGGCCATGTAACCCCGGTCCTGGCAAATAGGACCTTTATAATAGTCTGAAAGAATAAGGGGTGGATTATTGATCCTGGGAAAGCTTTTGGTTCTCCAATAAAAGGGGC	302	chr4	106470794	106471095	-	AC004066.3	none	0.522311	10.8172	2.95611e-08	3.32835	0	2.41537	0	0	1.76312	0	0	0	6.6287	11.3414	25.8939	8.19593	19.8265	14.846	10.4528	5.0766	10.398	3.30741	10.9689	12.5328	18.1964	2.0964	9.45954	3.85429
34494	AAAAGCACTGGACAGTGAGTTCAAGACTCAGTTTTAGTCTTGACTGTGATGTAAATCAGCTTCTTGATCTTACGGTTCACATAGTCTCCCTAGGTCCCAATTTCTTCATTTGTAAAATATAAGGGAGAATTCATCATTAGTGCTATTCACTGAATATTTTCAGTTCTCTCTTTAGGCACATGGAGGTATTTCACTTCCCTACACCTTTTTGATTTAGACTTGGCCAAGCAACTTGCCTTGGCCAAAGAAATTGATTGAATGTGAAGGATGTCACTTTTAGCGAATGTTTTAATAACACAGTGGGTGTTTTTGCTATAGCTG	321	chr4	106469883	106470203	-	AC004066.3	none	0.960881	10.5582	4.15829e-08	2.80609	0	0	1.93165	1.72356	1.76312	2.26872	0	0	12.3104	10.5853	12.4291	14.0502	11.6626	8.0978	12.195	5.0766	10.398	5.51236	10.9689	12.5328	11.12	13.6266	5.51806	12.8476
75643	GGATCTCATTTGAGGTACTAAGAAGAATAAGCAATTGGTTTGAAAAAAGCCCTTTTAAGAGCAAAATGAATTCTGCTAAAGTTGAAGCAGGAACAAATATCAAATTTATGGTGAAGCTCAGGTGGAAGAATGATGAAATCACTGATGCTTTACAAGAAGTTTATGGGGACAATGCCTTAAAGAAATCAGCAGTTTACAAATGGATAACTTGTT	213	chr4	106461272	106461484	-	AC004066.3	none	7.30761	31.7289	1.16823e-07	1.96615	4.40455	12.0768	11.5899	4.30889	6.17091	12.8561	4.16878	2.88486	31.2496	19.6585	49.7163	32.7837	64.1445	28.3423	37.456	33.3605	38.7562	34.1766	14.6253	35.0917	27.2946	16.7712	13.401	30.8344
6130	GGGGCAGTCTCATCTGGCTTCAACCTTCCCCCTTCTTCTAGACTGATCACAGGGGTAATGCACGGAGCAGTCACAGCCCTCCTGTGTCCATGAGAAAAGACCAAGAGATCCATGGGCTCTGATACCATTGACCTATGGAACCAACATCAGTAGTCATTCACCTTTAGACTTGTTATGAGGGTCAAATAAATCTCCCCTCCCTAAGCTATTGTTAATTGGAGTTCTTGTTGCGAATACAGTTCTAGTGGATTTAACAGATGGTGCTTAATTTACATACAGATTCACAGTTCTCTTGCTTATCTCCTTGACATTTCTTAAGCCAGTGTGTTTAGAATCCCTAGCATAAAACATGACTTAATGACTTAGTTTTGCTAGAAATGAGAACAGCCAGGTCAAAGA…	482	chr4	106470317	106470798	-	AC004066.3	none	1.16419	12.6791	1.4954e-07	2.79005	0	0	2.89748	1.72356	0	3.02496	1.66751	0	7.57566	18.1463	22.7866	8.19593	12.8289	13.4963	27.8743	9.42796	15.1244	2.20494	7.31263	17.5459	18.1964	4.1928	10.2478	7.70859
67964	AAATAATCCAAGGTGATTCTAGATTATAACACTCATAATTCCAAAACAGAAGTCACATCTCTTGAATGATGTCATGAATAAACTAAATTGGAGGAAGGAAAGAGAAAAAGTTAGGAGCTTATTGTAGCAGTCCAGGCAAGAAATGCTTGGACTACAATAGTAGGAATAGGAATGAAGAAAAGTTGATGAATTCGAAATACCTTTTAAGAGTTGAACTGACACAACCTGTAGATGATTTGATTTAAGTGGATGAGTAAAAAATTGAA	266	chr4	106469336	106469601	-	AC004066.3	none	1.64821	13.0031	2.06624e-07	2.56349	0	3.62305	3.86331	0	1.76312	2.26872	1.66751	0	10.4165	12.0975	27.9654	8.19593	19.8265	16.1956	20.9057	9.42796	18.9055	4.40989	8.2267	18.3814	7.07637	9.43379	6.30636	10.2781
55751	CCAGTGACTGTTGAACTCAGTTTTAGCATTTTTGGAAACTGAGATCCAAAAAGTGTAAATGATTGTGAAACGGGCTTCAGTGGCTTCGTTGCAAATCTAGAACTAAACATCTTTTTCTTTTGCTACAAAATGTTGTAAATACTGAAAACAATTTCTCATCTAATTCACTATTGCAAGCTGTCGCATAATTTGGCTATAATCTTGAAGCCAAATGGCTCATTTTGCAGGCATTATTTGCACAGCCATTTCCTTTCTTTTTTTGTGGCAGTATATGTGTGGATTAGGAGTAACTCACAGCAACCAAAAGTAAACTAAAAACAAATATGTCATTTGATTTTAAATGTGCTAAATTTTGTCCTGATGTTAGTATAAATAGTGTATAAACAAGATGTGCACACT…	953	chr4	106462710	106463663	-	AC004066.3	none	3.47564	23.9131	2.69705e-07	2.45379	4.40455	6.03842	1.93165	0	5.28935	6.80616	3.33503	0	25.5678	19.6585	47.6448	19.9044	58.3132	8.0978	38.3271	8.70274	35.9204	13.2297	15.5393	27.5721	25.2727	11.5302	15.7659	11.5629
114048	GGCTCATAACTCAGGCAGTGAACTGAGGTCACTGGTAAGGTTTGAGGATTGTACCTGTGTGAGTTTTGTGTATTCTTATGTGGCTCAGGTCATCTGGGTAGTTTTCTGCATTCGACTAGTGTTTCAAGTAGACAAAATCACACACAAACAAATGCGAAATTGTGTTATGTTCAAACAATTCCCTAACATGTCAATCTTGTTGGAACAAATTTGTATTTTCAAAACAAGTGTTATAGCAGAACTTATTGTAATAGCTTCATTATACAACCCTGTATTGTTTAACAACAAGGATACATTC	298	chr4	106471638	106471935	-	AC004066.3	none	1.86912	12.0354	1.26269e-06	2.29044	0	0	4.82914	0	1.76312	2.26872	4.16878	1.92324	14.2044	12.0975	22.7866	14.0502	15.1614	12.1467	20.9057	7.25228	11.3433	6.61483	10.9689	12.5328	10.1091	11.5302	3.15318	7.70859
4138	GAAAAGAAGAGAGGGGGAAAATAATAAAAAGAGGAAATTGGTTTTCACAACACACTCAAAGCCTGAGTAACAGAGGAGAACTTTAATTATCTCCAGTCACAAAGAGAGACAGGAAATTTGGACTTTTAATTAGCCATTTGGAGTGCAGTTGGGTATTTTTTTAGCTAGATAATTTAAACGCGAATAATTCAAGTCTGACTAAATGAAAGTCACATAATCAGAATGCAAATAATTGAATTTCTACTGCATTCATTAATTCAGTGTGGAGGTGTGTGTGAAG	280	chr7	26411828	26412107	-	AC004540.4	SNX10	3.05274	24.3842	0.000595603	2.28842	13.2136	2.41537	1.93165	0	3.52623	0	3.33503	0	62.4992	34.7804	2.07151	7.02509	30.3229	55.335	54.0064	1.45046	32.1393	14.3321	1.82816	15.0393	16.1745	5.241	3.94147	53.9601
12976	CAACCGCCTTTGATATTATTCATAATATACTAGGGGGATGTGATTTTTAATGTCACAAAGGGTGTACAAAATGTCACAGGGTGTGTATGCCTTATGATATTATTCCTGATATCCAGAAGGATGTTACTCCTAAGGTCACAGGGGGTGTACACCCTTCGATAATATTTGTAGTCTTATAGGGAGATATTCCTGTAAATCTCACAGTGGGTGTACACTACACCCACTGTGAAATTATTTGTAATATCTCAGAGATATTACAGAGTTATAGCTCTCTGTGTTATATTAGAGAGTTACATCTCTCTAAGAAAGTACAAATAATACCACAGTGGGTGTACCTTATGTGTGTACACCCACTGTGATATTATTTGTAATATCCATGGTAAACATTACATCTAATAT…	497	chr12	52504296	52504792	-	AC078864.1	none	12.0141	39.6952	5.49728e-06	1.63528	20.5546	8.45379	12.5558	16.3738	6.17091	10.5874	10.8388	10.5778	30.3026	65.7802	47.6448	42.1505	38.4867	28.3423	66.2013	39.8875	51.99	42.9964	45.7039	37.5983	13.1418	14.6748	14.9776	55.2449
58688	TCTCCTCCAGGACGGACTAGCCAGTCCTAACACAGGACTAGCGTTGCTCTACCACGTCCAAGCCTCCTCTGAGATTCTTCCTCCATGCAACCACTTCCCCTGGGGCGTGGCCACCTCCCTGGAAGCCGCCAGCATGCTCGGCTGGGCCCCCGCACTCTGGAGGCTTGAGAATCTCTCTATTTTTGAATGACGTCCTTATCCTCTGCCCCCAGGCTG	216	chr2	238500209	238500414	+	AC104667.3	RAB17	1.58867	13.6398	9.70366e-06	2.56148	5.87273	0	0	0	2.64467	2.26872	0	1.92324	17.0452	4.53657	5.17878	18.7336	22.159	17.5452	4.35535	5.0766	7.56219	28.6643	26.5083	19.2169	19.2073	2.0964	2.36488	17.9867
38057	TTCATACTGTTTGGCGTGGTTTTCAATATACACAGATGTAAAACACCTGACATCCATGACAGGAAGGTCACTGAGGAGGACTGTGGAGCTGCAGGTTTTCCACACTCTACAGGAAGTGGTGTCCGATTAATTCCAAGCCAACTGTGAAAGATGACATGTGTCTATTGCAATAATTAGAGCAGCTGTTAAAAGAATGATTCAAAGAGATACAGCAAAATGCAATATAAATTTAGATGGGATACTAAAAAGATTTAATCTGAAAGACAGAGGAACAAAAGCAGAACAGACACACAGAAAAAAATGGTAATTTTAAACCAAATTGTATCCACGATGACATTATATTAATTAATAATTACACATTGTATATTAAAAATAATTTAAAAGGAGACTGAGCGAATA…	404	chr2	1612709	1613112	-	AC144450.1	none	0.649218	20.6623	1.11689e-08	3.54101	0	0	0	0	3.52623	0	1.66751	0	19.8861	14.3658	18.6436	4.68339	22.159	35.0905	86.236	16.6802	10.398	12.1272	9.14078	16.7103	36.3927	2.0964	1.57659	24.4105
53644	AGGAAGTCATGAGCGAAGAGACCGTGAGCCTCTCCCAAACCCCGCATGTGCTGACATCTCCACGTGTGCTGTGTCCTGGGTAGGCTTTCTTCATAGACCGTGCTTCCGTCTGTCTGGAGTTTCCGCTTCATCCATCTGTCCACAGGGAGGACGCACACCCCTGAGTCCGAGGCCACACCACGCATTCTGTAGAAACTCTCACTGCCCAGGGAGCACACTTTATTAGGAAAGCTCCAGGTTCACAGA	246	chr2	1550464	1550709	-	AC144450.1	none	0.301921	12.8488	4.34296e-08	3.57984	0	2.41537	0	0	0	0	0	0	21.78	16.6341	19.6794	2.3417	4.66505	17.5452	23.5189	5.0766	18.9055	17.6395	10.0549	15.8748	15.1636	0	0	16.7019
87341	TAAGTCTTTTGCCAAGACTCATATAGAGAAGAGCATTTCCTAGGTTTTCTTCTAGGATTTTTATAGTTTGAGGCCTTACGCTGAAGTCTTTGAAATCCATCTTGAGTTGATTTTTGAATATGGTGAAAGGGAAGGATCCAGTTTCAATCTTCTGCGTATGGCTGGCCAGTTATTCCAGCACTATTTATTGAATTAAGGGCCTTTTCTCCATTTGTTGTTTTTGTCAGCTTTGTTGAAGATGGGATGCGTGGCTTTATTTGTGGGTTATCTTTTGTGTTTCATTGGTCTATGTGTCTTTTTTCTACCTATACCATGCAGTTTTGGTTGCTGTGGTTTTGTAGTACAGTGTGAAGTTCGGTAATGTGAGGTCTCTGGCTTTCTTCTTTTTGCTTAAGATTG…	429	chr2	1619443	1619871	-	AC144450.1	none	0.301921	13.3891	1.00118e-07	3.53243	0	2.41537	0	0	0	0	0	0	15.1513	11.3414	6.21454	0	22.159	21.5941	44.4246	10.1532	22.6866	4.40989	6.39855	7.51966	33.36	2.0964	1.57659	5.13906
76071	GTTCCACATTTCGCGTTAAAACTGAAAGCACAATTACATTTAGTGGAGGTATGATTTGAGTGACTGGATTTCTCTCTAGAAACCGGCACATGAAGGTGCAGCTTGAAAGTGTTAGGAGACTGTCAACAACAACAACAAAATCCATCTGACGAAGGCAAAATACATTTAGTTCCAGATGACCTTAGCAAAATACAGAGAATTT	202	chr2	1613305	1613506	-	AC144450.1	none	0.323167	14.0828	1.37596e-07	3.47256	0	0	0	2.58533	0	0	0	0	11.3635	9.07314	11.3933	3.51254	24.4915	32.3912	44.4246	15.955	5.67164	8.81977	1.82816	19.2169	22.24	2.0964	0	12.8476
42101	GCGAATAAAAACAACCCCAGTATTGTTTTCAAGAGTCATGCTTTAAAATTAAAGATACACATAGGTAGAAGTTCAATAGATGGCAAAAATCATACCATGGAAACATTGAGCACAGAAGACTGGATGGCTATGTTAATACCAGATAAAACAGACTGAATACAAATAATATTACCAGAGACAAAGAAGGACATTTCATAGTAATAAAAGGAAAAATTATCAGGAAGGCAT	228	chr2	1612493	1612720	-	AC144450.1	none	0.323167	11.9563	2.04886e-07	3.39053	0	0	0	2.58533	0	0	0	0	12.3104	8.31704	11.3933	0	8.16385	20.2445	45.2957	13.0541	14.1791	8.81977	4.57039	11.6972	16.1745	0	5.51806	11.5629
4269	GCCACCGTGCCCGGCTCCGTGACTTTTTAAGAGGTGAAGATCTTTGCTTATAGCCTGATGGTCACAGAGTCTTTGTATTTTTTGCAAATAGTACACCTGAAGCCGTGAGATTTGGGTGAGCTCCATTCCCGTTAATTGCTATTTGAGCTCAGACAAATTATGTAACTTATTTGAGACTCAATTTTCAGCTATAAAATTGTCAACCTAATAAGAATTTTTT	220	chr2	1628439	1628658	-	AC144450.2	none	0.543378	27.4295	2.70735e-06	3.2948	0	2.41537	1.93165	0	0	0	0	0	55.8705	10.5853	15.5363	2.3417	45.4843	41.8386	136.758	2.90091	50.0995	7.7173	7.31263	15.0393	24.2618	0	0	23.1258
17795	CCTAATCTTTCTACTGCAAAGATGCAGCATTTAAAGCAATTTTTCCTGTGCAGTATTTGTAGAATGACAGATCCTGCCAGAAGCTCTTGGAAACATTTTGGAACTATCTTGCTTTTCTGTATGTTATGATCCATCTAGCACCGTTTTCCTCCTGTGGTAGCAAATGACACTTTTTTCAAGCATCAGCAGCAGAAATGAGTCTACCAGATGGAATAAGATACTGGTAAAGGGAAAGATTTGTTTCTAAGACTGCACAAATGAATGCACCCAAATCTGTGAGTTGATTAATCTGTGAAGAA	299	chr1	169456094	169456392	+	AL021068.1	none	5.40945	14.2685	0.00435583	1.29769	8.8091	4.83074	4.82914	2.58533	3.52623	5.29368	6.67005	6.73135	28.4087	12.8536	15.5363	21.0753	19.8265	12.1467	9.58177	7.97751	13.2338	33.0741	6.39855	4.17759	11.12	7.33739	16.5542	8.99335
72808	GGCAGCCCTGAGAGGGCGGAGGAAGGAAGAGGCTGGGAGCTCGGCGCCCGCGGCGCAGCTGCCGTCGCTGCCGCAGCTGTCCAGGGAGGATCGCCAAAACGGCGACGAATAAACAACTTACCTTGCGGAGAAGAGCTACGACTGCGATGCGGTGTACGGTTGTTTTTGCTTTTGCGTTGGCGGCTTAGGGGCTGTTACTGTGTCCCACCCAGGCGTGCACACCGAGCGGCGGGGCG	236	chr4	102269269	102269504	+	AP001816.1	PPP3CA	4.5296	19.1789	6.11811e-05	1.88355	7.34091	6.03842	9.65827	0	1.76312	6.04992	2.50127	2.88486	28.4087	9.07314	14.5006	5.85424	5.83132	31.0416	20.0346	13.0541	29.3035	27.5618	8.2267	20.8879	18.1964	12.5784	17.3425	44.9668
17958	TTCATCTGTGGAAGTTAGAGCAGCTTTGGGGGAAAAAAAGAAATTCTAGAACTGAAAAATACAATAACAAATTAAAAATGCAAGGAGCATGTTTTACAACAGAATGGAAACAGCTGAAGAGAGAATTATTAAACTGGAAGATAGACCACAAGAAAATAGCCAGATTTAAGCAAGCAGAGACTAAAGATGAGAAAGACAAGAGAGAATATTAGACTTGAAATACATGGCGAAAGGACCAGAGTTTCAGGATGAGAGAAGAAAGAAAATGGACAGAAGCAATATTTGAGGAGATAGCAGCTGAGAAAATAATTTATTTCTTCTCTTTATTTTATGGGG	336	chr21	42949997	42950332	-	AP006748.1	none	0.220389	16.12	6.14224e-09	3.79713	0	0	0	0	1.76312	0	0	0	19.8861	15.878	13.4648	2.3417	12.8289	8.0978	29.6164	17.4055	26.4676	8.81977	36.5631	10.0262	48.5236	0	1.57659	6.42382
6163	CACTTGAAAATAGTCAAACTACGATTGTTCCCTGAGAGTTAAACCTTACAATACAGAAGTAGCTGATCAGGGCAAAGATGTGCAAACCTTTCTTAATGACACAGAGTAGTGCCCAGGAAAGCTTAACTTGACAACGACCTGAATGATGTCATGTCTTAATCAATTAGGTGTGTAAATGAAGGGCCAATTTTATCAGCCAAGTAAGCAGAGTAAAAGGAGGGT	222	chr21	42949529	42949750	-	AP006748.1	none	0	11.245	1.78206e-08	3.85506	0	0	0	0	0	0	0	0	9.46957	7.56095	21.7509	5.85424	5.83132	5.39853	14.8082	12.3289	16.0696	3.30741	20.1097	7.51966	44.48	0	1.57659	3.85429
25852	CAAAGCAAGACACTGTCTCAAATTAAAAAAAAAAAAAAAGGCTTAGGGAGTTACTGAAGAATCACCCTGGGCTGTAGTTCACAGGGAGTGTGCATAGGTTAAGGAGAAGACATCTGCATGAGTTTCAGTAAAGAGATACAGTTGCGGTGGCTGGGCAACCTCGTAAACATTCTGGGAAGGAATGCAGAATGCAAAACCCAGCTGAAAA	208	chr21	37520335	37520542	-	CBR3-AS1	none	7.18807	18.1941	9.59309e-05	1.28262	10.2773	4.83074	10.6241	6.89423	6.17091	8.31864	7.50381	2.88486	13.2574	17.3902	18.6436	11.7085	13.9952	22.9438	27.0032	15.2298	21.7413	16.5371	17.3675	20.8879	24.2618	8.38559	17.3425	24.4105
86262	CCGACCGCTTCAGGGTAGGACGCACCTGGAGGGTGCGCGGTAGGCAGTGCTCACCTGAGCACAGGCCCTGTCCCCACCCAGCTGTGGCTCCAGCCAACCCGAAGTGGGCCACTTGTGGATGAAGGCTGTCATTTCTGCAGTGGCCTCGCTCCTTTTAACTCCCGAGCGTCCTTTAGAAATGTTCAGACCAGGTCTGGAGTTCGTGAAGGCGAGGCAGTGGTCAATGAGCTTGGGAGGTGGGGGAGGTCATGAGCACCT	258	chr21	37527787	37528044	-	CBR3-AS1	none	9.96985	23.0232	0.000288134	1.14682	10.2773	9.66148	13.5216	6.03245	8.81558	16.6373	10.0051	4.80811	24.6209	27.9755	21.7509	15.221	18.6602	35.0905	20.9057	23.9325	25.5224	16.5371	36.5631	25.0655	23.2509	14.6748	14.1893	24.4105
56855	TTTGATTCAGTGGATTAGAAAATAATCAGATAGATAGGGTACATGCGAGCTGCCCCTGAAGACTGGGAAGAGTGTGAGAGGTAGAGATAGGAAAAAGATATTTAGGTGAAAGAAAGAGTGTGAGTGAAGACAAAGTAGGGAATCATGGTGGGACATCAAGAGCACAGTATATAGCATGTTTTGGTCCAAGTATATCGTATATGAAATATTCAGAGA	216	chr7	103133206	103133421	+	CTB-107G13.1	RELN	0.220389	13.3136	8.96327e-08	3.56076	0	0	0	0	1.76312	0	0	0	2.84087	6.80485	24.8581	4.68339	2.33253	17.5452	9.58177	36.9866	6.61691	15.4346	45.7039	5.84862	19.2073	9.43379	0	5.13906
114321	GTGTATCGTTTTCCAAATCTTTGAGTAAACCGAATGCTGCTCTAGGAAGATTGCACTCCATTGTATTTATCCTGCAGCTTTGTGTAACCTGTCAGCCCTGCACACCCAGCTGGTATTTGTATCTGGATGAGAAGCGCAGCCTTTGGGAAGGCAGAACACTGGGGCAGAACTGGTGCCAACACCAGTCTTGGATTGGGGTCTGTCATTCAGGGCCTGTGATTGAGTTTGGTACATGCTATGGTATTAAGTCAAAGGAAATCTGAGATCTCTGAATCATTTACAGACACACTCCAATTTCCTCCTGGAACATGCAGTTGCCATTTGGGGGCATGGGTTGGTGAGAGGAGGGAGAAAAGGAGGGAAGATGGGAGAGGGCACCAGGGCTGCATGTAAAGCTCT…	761	chr7	103130625	103131385	+	CTB-107G13.1	RELN	4.35456	52.3992	7.82186e-07	2.86821	4.40455	4.83074	2.89748	0	1.76312	5.29368	10.8388	4.80811	19.8861	9.07314	61.1096	19.9044	25.6578	41.8386	28.7453	110.235	23.6318	106.94	199.269	4.17759	85.9273	20.964	3.94147	77.0859
6055	GGAATTTGAAAGCAATAAGATAAAATATAAACATGCAATCCAGCACTTTCCCCCTGACATTCCCCAATGGATTGTCCTGGTGTGTGTGCCCTCACTTTGGAGACTGCTTCAGGCAGCCAGGATCCTTCAGCCTCTAGCACAGAATGAACCTTGAAGGTCTACATGGTTAGGCAGGGACACTTGAAACCAAATCTCTCTATATAAGTCAAAAGAAAGTAAACCTTTGAAGGCAGTTTGAAAGATGTTTCACCTGTTTATCAGGCCAAGTTGCAGGGTGATAAGTACTCAAAATCTAGAATACAATATTTTCCCCTGAGTCTCCAGTTTATCCTTTTAACTAAGAATGATTGACAACCAGAAAATCTATTTTTCAGAGAGTGTACAAAGTATAAAGGTTCT…	629	chr7	103139370	103139998	+	CTB-107G13.1	RELN	0.691353	12.9236	2.1462e-06	3.01999	0	0	3.86331	0	0	0	1.66751	0	2.84087	4.53657	15.5363	2.3417	3.49879	12.1467	16.5503	41.338	7.56219	8.81977	31.9927	2.50655	29.3164	12.5784	2.36488	12.8476
50066	ACTGTTTAGGCCTTTTTGAAAATTTGGTCTTTTGTGATAATGTATATTATTTGCTTTATTTCATAACAATAATAACAATAATATCTTCCTTCAAATAGTGCATCAATTGAAAAAGTGAAGTAAAAAAGGCTTAATATTGACTTTAAAAATAGTCTGCTTAAGAAAAAAAAAAGAAACCCAGAGTATTTATCATTTGTAATCCATATAGTCTGGCT	215	chr7	103140766	103140980	+	CTB-107G13.1	RELN	0.953875	15.301	6.92105e-06	2.87287	0	0	1.93165	0	1.76312	2.26872	1.66751	0	3.78783	2.26828	40.3945	2.3417	4.66505	12.1467	14.8082	50.766	9.45273	17.6395	31.9927	5.84862	25.2727	15.723	0	7.70859
6156	GTTCTATCTTACTGTGTAGTTAAAATGATTTAAACAGTTTCTTTTTCTCAAACTTAGAAGATAATCAATTCTATAGTTAAAGACATACAGTCAAATGTCAGTCTGCCTTAGTCTCACTAATGGATAGCAAATGAATACGTTTTATAATTGAAAGCTTGTAAGAAGACAAGTGTTAGAAGAAATGCATGGTTAACCACGTAAACTTTCATTAGAAGATTTTAATCAGGGTTTATAATTTATAGATTTGTACAATTTCTTATCCAACTGAGGAATACTAATAAAATTTGAGTGCTCATGAAAGAAATTAGATTTTCAAAAGTTTATTAATTACCTGTGGTATATAAAGCTTTGTTTTTCATGTGGTAACCTCATTTGTTAATAATGTACTTACATCTTCAG…	782	chr7	103139994	103140775	+	CTB-107G13.1	RELN	0.700468	14.6874	7.20557e-06	2.96605	0	0	0	0	0	2.26872	3.33503	0	4.73478	3.78047	38.323	3.51254	3.49879	12.1467	15.6793	58.7435	11.3433	8.81977	23.766	3.34207	28.3055	12.5784	0	6.42382
82111	TGATTACCGTACTTTTAAAATGTAATTGCTAGTCTAGGTAACCTAGCACCGAAAAGTTCTTGATACACTTTGTCAGCCAGTGCATTAAGTATTTCTGTGACACATTAATTACTAAAGAAACTAAAATTATTTTCGGGTATTGAAATTTCAAATTATATTTAAAGCCAGACATTGAGCCTTTAACATGATTTATTGAATGCTCAGTGGACATTTCAAAAAGCAGCCAACTTTGAAGATTTATAAACCACTGGGCAAAATAACAGCTAACATTTGTTGAGCAGGAGTATGGGCTAGGCACTCTTATAAATGCTTTTCATGTGCTAATCTATCTGAAGACATAAGCAGAAAAATGGCTCACAGGAAAGAAAATTGTTCAATGTCTTGTTTCTTACCATCATC…	962	chr7	103136581	103137542	+	CTB-107G13.1	RELN	1.4483	18.388	9.69866e-06	2.75401	0	0	2.89748	0	1.76312	0	5.00254	1.92324	5.68174	2.26828	33.1442	8.19593	4.66505	12.1467	17.4214	55.8426	5.67164	14.3321	53.0165	5.0131	39.4255	17.8194	1.57659	17.9867
3984	ACTATGTCAGACTTTTATTCAATACTGTTAATATGCTTTAGAAGAGGTGACTCTGGCTGATGCATATTCAGATCATTCACTGATTAAAGTTTTTGTTAGAGGTAGTTGAAAATGAGTAACATGAATAAGAGAGTTCTACTCTGAGGACAAATGTAGTGCTTTGCTTATTTTGATAAAATTTAAAATATAAAGTTTCTTGGTGGCAGCCTTGAATGAAAATGGATTTTTTTGGTTTGAAG	239	chr7	103131658	103131896	+	CTB-107G13.1	RELN	1.40293	15.8885	1.37071e-05	2.66135	0	0	2.89748	0	2.64467	1.51248	4.16878	0	3.78783	11.3414	14.5006	3.51254	2.33253	14.846	15.6793	38.4371	13.2338	9.92224	67.6418	4.17759	24.2618	20.964	3.15318	6.42382
2582	TTTTCATGATGTTGGAAATCTTGTTAGAGTATTTCATTTAGAACACCTTCTATTCTCTGAAAGGTAACGTGGGCCAAACAGACAGCTGAGGACATGGAGAGGACATGGAATACAACCACAATATTTATGCTGCATTCTTTTTACAAATAGCTCCAAGCTGAACACATCTGGATGGGGATAAATTATTATGACTGTTTTAGGAAAGGCTGTCTGGAGATCAGAGCTGAGGGAAAACTGAGTTAGGAC	246	chr7	103125124	103125369	+	CTB-107G13.1	RELN	1.54548	16.3617	1.82996e-05	2.61494	0	0	2.89748	1.72356	4.40779	0	3.33503	0	3.78783	6.80485	30.0369	3.51254	3.49879	10.7971	12.195	68.8967	9.45273	7.7173	25.5942	12.5328	41.4473	12.5784	3.94147	8.99335
102901	AGAGTAACTATGCTAATTAGAAAACAATTTTGAAAGGGTTATATTAAAGGACATTTTCTTTGAGATTTTAATTTCATCTTTGTTCTTCTCTGTCTTCTGGGGGAAAAAACAAGCCTCATAATTATCCTTATATTAAAATATGCCATACTATTTTGGTTTAAAGAATCCAAAGTACATGAAGGAACTTTCTGGGGTGATATAAATGTTCTGTATCTTGTTTTATGTGGTGGTTACATGGGTTACACAACTAAAAACTCATTGATCTGAACAATTAA	275	chr7	103141854	103142128	+	CTB-107G13.1	RELN	1.79074	16.4114	5.23524e-05	2.46054	0	0	2.89748	0	2.64467	3.7812	5.00254	0	3.78783	4.53657	30.0369	10.5376	2.33253	28.3423	15.6793	59.4687	9.45273	7.7173	27.4223	2.50655	31.3382	13.6266	5.51806	10.2781
41823	CAGGACTCAAGAGTCAAAGTGCACAGAAATTTGAATTCCGATAAGAATACTCTGAGCCAGTTTATTCTGGGGTACATACTTCATTTTATGCTAGAACTCTGCAATCCTGATGAAAGAGGGCTTGCATTGCTCAACTAACTAACTCACCCGTCTCTCCTGCAGTATTAGAAACTACTTCTGTATGTACACGTTACAGTTTCTAGGAACTCCATTTTTGCAAGACAGATAGGAGCCAGAAAATTTGTTCCTTCAACTGTATATCGCTAATTAAACATAAAATCAAATCAGCATTTTAGGTACTTGAATAACTAGTCTGTGCTTACTTTTATTCATATGGAAGCAGTGTTTAAATTATTCTCTGATTGTAAACTCACTTATGTAAACCATTATACAGGAAAA…	687	chr7	103153518	103154204	+	CTB-107G13.1	RELN	2.57571	23.1683	6.52333e-05	2.46448	0	4.83074	3.86331	0	4.40779	0	7.50381	0	4.73478	4.53657	30.0369	11.7085	6.99758	20.2445	22.6478	50.766	9.45273	41.8939	84.0952	5.84862	46.5018	15.723	3.94147	11.5629
25785	GTGCACAGAGGTCCACAGTCTACAAGGTTGAGAAGGTAGGGTACACCTTTTCATCTGGCTCCAAGGCCATCACTATTGCTCTGTTCCCATTTTAAGATACTGAGGTTTAGAAAATAAGAGTCTGCAAAAGCCCATATTGCCAAGTCTGAGGATTACAAATTGAGGTCTGAAGTTAGCTCATCATGGAAGTTATGATGAAAGTAACCAATTAGAGAACCTTTAGAGTTAGGGAGAAAGAAAGCACTTTACCCACAAATACACATAATTTCAGGCATGACAACAGTGTACCTAATGGTGTACCTTCTGGATGCTTGGAACCAGGC	323	chr7	103143118	103143440	+	CTB-107G13.1	RELN	2.12173	17.8102	6.63429e-05	2.40861	0	2.41537	2.89748	0	2.64467	1.51248	7.50381	0	8.52261	4.53657	33.1442	5.85424	6.99758	21.5941	11.3239	72.5228	4.72637	5.51236	23.766	9.19069	35.3818	24.1086	2.36488	15.4172
14155	CTGTGAGGGAACAGTCAACCCGGCCAGGTGAGAGTGGTGACAGCTTTATTATATAAAGAGGGAAAAACACCTTTAACTTGTTAGGTGCTGGGATTGGTCAGGAGGAATCTGAAACCACAAACTCTTTGTTCTAGTTGCAACCACATCATTCAATGGAGAATGTCTGTAATTGGGCACATTAGCTAGTAACACTTCAGACACTGCCCACTACAGATCCTTCCTCTTCAAGGATGTCATTTCATTTTATAAGGCAACCCAGATCTGCCTTAAGACATGGTTTCCCATTTACCTGGAGACTTTTGTTTTATCCAATTTAACCAATATTGTCAACCCTTAAATAAATGTTGTGCTTATGGAAGTTTTCTAAGGTACATTACATTTCATTCGGGGCTTTGCTATT	400	chr7	103122750	103123149	+	CTB-107G13.1	RELN	1.76055	18.5611	8.0737e-05	2.53266	0	0	4.82914	0	4.40779	1.51248	3.33503	0	2.84087	6.80485	31.0727	4.68339	3.49879	14.846	12.195	61.6444	4.72637	23.1519	35.6491	10.0262	42.4582	24.1086	0	19.2715
12256	GTCTGACTAACCATTCTCCCTCGAGGCCCCAAATGCAATGCTACTTTCTGTTTTAAAGAGCCACTTTTCCTTACTTTAAACTGCATCATGTATCCTGGCTGTATAATGAGTTCTCGGGAGGAGAGAGCATTGTGAGTCTTGTCCTTCTTTTTATTTGGCCAATAGAGGTGAAAGGATGGATTGCCACAAAATCCTGCTGTCCTTACAGCATTAGGGTAAAAACTCCAGTTTTCTTCATGGGAAGTGCCTTCTGTTAAGGAAAATTGGAAGCAATATGGCATATTAT	286	chr7	103136096	103136381	+	CTB-107G13.1	RELN	2.39568	18.5817	8.11094e-05	2.34983	0	3.62305	3.86331	0	4.40779	2.26872	5.00254	0	6.6287	9.07314	21.7509	3.51254	5.83132	24.2934	13.0661	69.6219	4.72637	13.2297	43.8758	5.84862	36.3927	17.8194	2.36488	19.2715
23923	AGGTCCAATTCTTTTCTAAAAGTCTTCTGGCTAGTCCCAGCATTTCCAGGGAAGCTGAACAGGTGCAGCCGGAGGCTTGGAGCCACTATGGAAGCAGCACAGTTGATGCCTCAGAGGATCCAGAGAAAAGACCAGATAACTATAATTCAGCCTTCACCCATATTGTGTCTTTTTGATTTTGTCTGAGTATATATGCCGCACAACAAGCAGCTTATCTCTGAGATTCAAATAGTTACTGCAATTCCATT	248	chr7	103153214	103153461	+	CTB-107G13.1	RELN	3.13115	24.3619	8.44272e-05	2.36143	0	3.62305	8.69244	0	7.05246	1.51248	4.16878	0	7.57566	7.56095	25.8939	14.0502	6.99758	24.2934	24.39	67.4462	6.61691	22.0494	81.353	5.84862	50.5455	31.446	4.72977	8.99335
22416	TGAATTAAGGGTCATGCTATATCAAAGGAATTTCAAACCTTCCTGAAATGGACATGGGATGCCATGTAATAGATACTCACAGGACGACCTCCACATGGTCCAAAGCCCATTGATCATGACCTGTTCCATTGTGGCGTGGTTGCCACCAGCGCAGTAAGACTCCTTTCATCCGTGCCTCCCTGGGTCACACACAGAAGGAC	200	chr7	103123240	103123439	+	CTB-107G13.1	RELN	1.47042	14.6189	8.44405e-05	2.49574	0	0	6.76079	0	0	0	5.00254	0	3.78783	6.04876	25.8939	3.51254	5.83132	10.7971	10.4528	54.3921	4.72637	7.7173	28.3364	9.19069	32.3491	9.43379	4.72977	16.7019
42337	ACTTTTCTGAGGGTGTTGGATGGAATTTGGGAATCTGCTCCAAGGGGTGGTTTTCACCCCTGACACATGCCTCCATCGGTAGAGTAGTCCAACAGCACGCCTTCCTTCCGGCAGATGGGACGATGGCAAGAGGTCATGTTGTTCTCACTACCGATGCGCCCCCAGTATTGCAGGAACCTGAATGCAAGCACATTTTATCCATCAGAATAATTCATTAGAACAAATACTCTACTCAAGTCCTGGATAATTTCTTCCATACAAGTGTTCCTTGCTTTGGGACCAATTTGCTATGGTGCAATAGAAATAACTAACAAAAAATTGACTTACTTTGCACCTCGAAGATCCAAATCTTGTGTAACCGCTTGTCTCACAGTGGATCCCCCAAAATAGAGTGCAGTG…	478	chr7	103138197	103138674	+	CTB-107G13.1	RELN	2.38756	19.0624	0.000185958	2.32159	0	0	6.76079	0	2.64467	3.02496	6.67005	0	4.73478	4.53657	29.0012	4.68339	3.49879	10.7971	17.4214	67.4462	12.2886	12.1272	43.8758	6.68414	34.3709	27.2532	3.15318	23.1258
61210	GATGTAGTCACTGATTAGATATGAAAAGTGAAAAATCAAAGCCTAGTTGAACATTTCAAGCTAGTTACTAGGTGATTGGTGGTGCCATCGACAGAAACAGGAAAATCAGAGGAGTTGGTATGGTGAGGGAAGATATTAAGTGCACCGTTAGACACATTCAGTTGAGGTGCCAATGTGCAAAGGTGTAGAAATGTGTAGGGGCTATTAAAATATTGAATTAATTGTTAGC	229	chr7	103133729	103133957	+	CTB-107G13.1	RELN	2.35406	17.397	0.000314399	2.24518	0	0	6.76079	0	2.64467	0	7.50381	1.92324	7.57566	5.29266	35.2157	5.85424	5.83132	18.8949	9.58177	44.9641	12.2886	17.6395	51.1884	3.34207	28.3055	11.5302	1.57659	19.2715
62024	CATGACCCATGATGTGAGTAATGCGTCTTGTCCAGGGCTTTACCCTTACCTTCAGAGTGTGGGTCAAGTAGCAGTTTGGCCCTGAGTATCCCGGATCACAGATGCACTGTTCCCTTAAGCAATCTCCATGGCCCCTGCAGTTGTCCAAGCATCCAGGGCCCAGGTAGAAATTATCGATTGCCCACTGCATGTCTGAGTACTTCTGATAGAACCTAAACCTTACCGGACTATTGACAATGCAAAAGCAAAGGAGTGAAAAACAAAAGTTAACTGTATTTAGGTCC	284	chr7	103141143	103141426	+	CTB-107G13.1	RELN	2.79206	18.7468	0.000398518	2.16543	0	0	6.76079	1.72356	2.64467	4.53744	6.67005	0	1.89391	4.53657	37.2872	3.51254	4.66505	24.2934	13.9371	70.3471	10.398	6.61483	29.2505	12.5328	36.3927	23.0604	7.09465	14.1324
90992	TGGACAGCTTTACAGATGCCTCATGTTAGGAAATTTTCCTGGATTTGAGTCTTCAATGTGGGAGCAGAGTTACCTGAATATATGGAGTTGATGGAGACATTCCTTGATGAGAAGCAGAAATTCCCCAGGGACCTTGTAAATCTGAAGCAGATAAAGGGAAATGAAGAAACCAAGTTTTACAACTTTGATGAGTGGCAAAATTTGTCAATAAGAGCTAGATATTAAGTAATTAGCTTTTAGGAAGCAAAGTGTATTGGACTTGGCTATGATATGAAGGAATTCATTTAATAAATCAAAACGAAAACAAAAACAACAAAAACAAAGAAGCGAAGCATGAATCTCCTAATCAGCAGAAAAGGGAGGACAGCCGGAGACAATCGTATTCCTGA	389	chr5	68339300	68339688	-	CTC-498J12.1	none	23.6498	67.1236	0.00135992	1.38906	32.3	24.1537	25.1115	15.512	16.7496	27.9809	35.8515	11.5395	57.7644	24.195	64.2169	44.4922	143.45	40.489	87.107	25.383	63.3333	79.3779	158.136	112.795	82.8946	39.8316	29.9552	20.5562
100981	GACCAAAATCAAGCTCTGGACAGAGCCTGAATCTGTCTCATGCAGAGCTTGTCACTGCAGGCCGGGCTTGTGGTTCTTGGTGAAAGTTGATCTGTTTATCTGGCGGTTGGGGAGGCCCCTGACCATTCCTGGCAGAATGAGTGCATTGGACTTTTGACCCACTTCTGGAGGTTTCAATCATGTCACGCCAGCTGACTCCAGCCGCACCACGTGACCCTTGAAACTCATTCATGTCACCTTTTAGACTTTTGGGACCATTTTCACTCTGACATACTGAGTCTTTAATCACTAAATCTACTAAAAATGGGCCAACTGTCTGATTTTACTTCCTTGTTTCCCCTCTTGATCCATCAATGTTGTTTAGGGAATTTGTTGATTGAATGTGGCTGTCTCCAGAAG…	447	chr19	54011385	54011831	+	CTD-2224J9.8	none	1.06842	17.5063	4.96524e-06	2.90442	0	0	1.93165	0	0	3.02496	1.66751	1.92324	29.3557	44.6096	9.3218	23.417	20.9927	37.7897	27.0032	1.45046	27.4129	2.20494	0	7.51966	7.07637	14.6748	1.57659	25.6953
61667	TGGTGAGGCCTCAGGAAACTTACAGTCATGGCAGAAGGGGAAGCAAGGTATGTCTTACCATTGTGAAAAGGAGAGACAGAGAGAGTGAAGAAAAGCACACACTTCTAAGCCATCAGATCTCGTGAGAACGCACTATCAGCAGAACAGCAAGGGGGAAATCCGCCCCCATGATACAATCACCTGCCACCAGGCCCGCCCCTGGCACGTGGGGATTACAATTAGACATGAGATTTGGGTGGGGACACAGAGTAAACCATGTTAGAGCTCATGGAGAAGTGTCCTATGTGATGGAACATCCTGCTTCTGTGGGCGTGACAGTCTTTGCTCTTTCTTGGCAGAGAAACACTTACAATAGTCACTTGAGGACCATGTATAGATAGGCTTTCTTTCTTCTGAGTT…	594	chr19	54013108	54013701	+	CTD-2224J9.8	none	2.2982	19.6415	9.53701e-05	2.41076	0	2.41537	8.69244	2.58533	0	3.02496	1.66751	0	22.727	57.4632	16.5721	19.9044	34.9879	18.8949	37.456	5.80182	34.0298	3.30741	0	5.0131	17.1855	26.205	3.15318	11.5629
98254	GTTCAGGAATTCAAGACCAGCCTGGCCAACATAGGGAAATGCCATCTGTACTAAAAATACAAAAAATTAGCTGGACGTAGTGGCAGGCACCTGTGATCCCAGCTACTTCGGAGACTGAGGTGGGAGAATCGCTTGAACATGGAGGTTACAAAAAAAATCATCAAAACTCAGGGTTTTGGCCACTGCCCACATTCTAGCTGTTTGTTCATCCCCATTCAAACTAGAGACTGTCTGAGGAAGCATACCCTCTTTGAGGCTGCAAACTGGAAACAATCTCAGCTGCTGATCTAACAGTTGCATCCGTGATTTAGGAGTCCATGGTAAAGGACTGTTTTCTGAAGCACC	345	chr19	54011042	54011383	+	CTD-2224J9.8	none	0.606757	10.9307	0.000103722	2.69843	0	0	0	2.58533	0	2.26872	0	0	10.4165	29.4877	6.21454	10.5376	12.8289	20.2445	20.9057	2.90091	24.5771	0	0	0	5.05455	15.723	3.15318	12.8476
14870	GTGTTGTAAAGAATCGATTTTGTCACTTTGTAATGTGTCTTATGCACTGCAGTCTATTTCTGAGTTGTGAGCTCCACCCATCTATCAGTCTGCCCATCAACCAACATGTCTTACAAGACTAGCTACCCTCATTTCGTTCTTTTTCAGAGTTTTCTTGATTATTCTTATTTGTGTTTTCACCTATGAGATTCTTGCAATAACATCCATAAC	210	chr19	54013745	54013954	+	CTD-2224J9.8	none	1.46413	15.4418	0.000173194	2.49504	2.93637	0	3.86331	0	2.64467	2.26872	0	0	22.727	43.8535	10.3576	15.221	12.8289	31.0416	28.7453	2.17568	31.194	0	0	5.0131	9.09818	17.8194	1.57659	15.4172
91479	TGGAATCAGCTTAGAGGTTTTCGGGAGGAAGACACTGAAACGTAAACGTTATAAGAAAGTGACGGTGCACAAACACACGTGCCTCATCTCTGTGTCCCTCGGAGTAGACGGGGGGAATGTGCGCAGATGCGAAGTTCTTGCTGTCATTTTCGTGATGAATAGTAAAATATATATTTTCTCAGATCCAGAAATCTCATGCCCTCAGTCAACATCCATAAACTGACAATCTTACTTGTTGGCTTGCAAGTAAGGTTAAAATTTAAAACCTT	269	chr19	54007750	54008018	+	CTD-2224J9.8	none	2.20921	17.2535	0.000201998	2.30281	0	3.62305	2.89748	0	0	7.5624	1.66751	1.92324	25.5678	36.2926	12.4291	14.0502	30.3229	29.6919	25.261	3.62614	39.7015	3.30741	0	4.17759	13.1418	19.9158	3.15318	15.4172
74968	TTATCCCTGTTTCACCTTGCTCTTAGGGACAAAATGTCTTGGAGACAGTAGGGGATCATGAGAATAAAGATGAAATTATAGGTACCAGAATGGGACTGACTGATTCTGTGGAGGGAGAGGGAGAGTGACAACCTGAAACCTGGAGAGCAGTCAACTTAGGTCCTAGGAGCACTGAAGAATGGAGGGACATTCATCACCTTTTTTCCCTCATAATCACCTCCGTGAGTCCCAGAAAGAGTCTCCCTGGAAATGATGTTGGGCCAGGACTGTGTTAGTTTCAGTTAAGCCAGAT	292	chr19	54012060	54012351	+	CTD-2224J9.8	none	2.34887	18.1257	0.000385621	2.26414	0	3.62305	2.89748	1.72356	1.76312	3.7812	5.00254	0	33.1435	46.8779	25.8939	25.7587	20.9927	22.9438	37.456	5.0766	21.7413	4.40989	0	1.67103	13.1418	16.7712	0	14.1324
7956	TTCTCACAGCTAAGCCTCTGTGGTAGGGCTGATCTGCAGAGCAATGCAGAGCCTGGGAAAGCTCTGATCACATGTGGAAGATGAAACTCTGGGCTTCTATTAGTCTGTTTTCCCCTAGCTACAAAGAACTACCTGAGCGGGTAATTTATACAGAAAAGAGACTTAACTGAATCACAGTTCCACATGGATGGGGAGGCCTCAGGAAACTTACAGTCATG	218	chr19	54012920	54013137	+	CTD-2224J9.8	none	1.48425	11.1426	0.000416033	2.25906	0	4.83074	3.86331	0	0	1.51248	1.66751	0	13.2574	33.2682	8.28605	10.5376	9.33011	12.1467	28.7453	4.35137	17.9602	0	1.82816	2.50655	10.1091	11.5302	1.57659	12.8476
112588	ACAACCTCCCTATGGATCAATATGTAATTATCTAAAGTATAAAATACTTAGAAAATATTAATATTTATCTCATACTATACAATATGGAAATTATAAGGAAAAGACAAAAGAATACCCAATTACTTATATATTCCCTACATAAAAATATATACATTTATATGGTAAAAGATTGCATTATCGCAGTGTAAAATGAAAATAGGAAAACATATAACAATATGTAA	221	chr19	54014422	54014642	+	CTD-2224J9.8	none	1.10117	11.7984	0.000446176	2.41158	0	0	1.93165	3.44711	1.76312	0	1.66751	0	10.4165	37.0486	12.4291	28.1003	8.16385	22.9438	16.5503	2.90091	10.398	0	0	3.34207	10.1091	8.38559	0	17.9867
91584	TGCAATTTCTGATAGGTTTGGTGATGCTGGGACAGATGTGACTTTGTGTAAGAGGAAGGTAGAAAGGTTCTTCACCGGTGTGGTTAGCGGACAGAAAACGGCTTTCTGGAACAAGCAGCAAATTCTCTCACCCAAACTGGAGTGAAATGAGAGTAAAATTCCTCCACTCTCTAACCCTGGAATGGGGCTGTTGTGTGAGAGGGAGGATTGAAATGAA	217	chr19	54008020	54008236	+	CTD-2224J9.8	none	3.23297	17.0411	0.00153784	1.95883	0	12.0768	3.86331	0	0	4.53744	2.50127	2.88486	30.3026	42.3413	7.25029	12.8793	23.3253	22.9438	31.3585	3.62614	34.0298	4.40989	1.82816	5.0131	14.1527	16.7712	3.15318	19.2715
56225	GTGATCCCCGCCCTGCCAGCAGAGGTAACTGACAGAACCCAAAGAAATGCAGCCTTCTGTTTTCCGGGGCAGGCTTATTGAAAGTATGTGAGCAGACTTACATTGCTCAATGATTTCAGTGGTCGACAAAAGTTGTAGATGACAAAATGATTTTGTCATCTGCAGCCTCTGGAAAAGGGAGGCAGCCTCCACCTAGAGGTGCCTGTGGGGTCCTAGTT	218	chr19	54010266	54010483	+	CTD-2224J9.8	none	2.54935	15.3568	0.00199754	2.00994	0	2.41537	3.86331	1.72356	1.76312	4.53744	4.16878	1.92324	28.4087	43.8535	10.3576	31.6129	11.6626	8.0978	28.7453	1.45046	27.4129	0	0	3.34207	11.12	12.5784	3.94147	23.1258
100346	GGTGGTGAACATCTCTGCAATGATCAGTGCAGGTTTCCCAACTGTCAGCCCCTTTCTTCTCATGAGTGGGGACTCCTGTGTATCCAAGCTTTGCTTTGCTTAGATAAGTAACACAAAACCCCCTAATCTTATCAGAAATATGTGAATTGGACATGTTTGTACAATGTTTATGTTTCTTCATTGATCTCTAGAGACCCATAAACACGGTTATGAAACGAGGCTTGTTAGTGCTGTGCTTGCCAG	243	chr19	54007430	54007672	+	CTD-2224J9.8	none	3.38884	19.4569	0.00291636	1.96695	2.93637	4.83074	5.79496	2.58533	2.64467	8.31864	0	0	25.5678	38.5608	16.5721	14.0502	22.159	45.8875	25.261	2.90091	37.8109	5.51236	0	1.67103	11.12	20.964	4.72977	38.5429
120877	GGGATGCTTCAGAAACCTGGGGGTTGCTTGTTTGTGTCTCTGGGAAGCCCTTGGTAAAGAAAGCCACCATTTTTTTTACTTAGGTATATTCCAGTGGTTTATCATCGGGAGAGGGATGATAATGGAGGAAGGCTCAATGAGGGAGAAAGTATTCAGCTGCTTGATGTTAGAGCTTAATGGCAGGACCTACCAGTTGCTTTTCACAGAAATGCTGTGTATTGATCCTAAGGCAGCATGTGTTCTCTTTTGTGTGGCCATTATCCATTCTCCCACTTTTCCATCAGTGACTGCTTTGCTTTTGTTCCTCAATCCTTTACCCAAAAATGGCTGAATTATTTCTGTGCAGTTAAATAAAGTGAT	360	chr7	25988287	25988642	-	CTD-2227E11.1	none	5.90023	27.3132	8.73313e-06	1.9693	0	8.45379	3.86331	6.89423	7.93402	4.53744	11.6726	3.84649	33.1435	23.4389	21.7509	16.3919	23.3253	33.7408	23.5189	12.3289	28.3582	48.5087	86.8374	23.3945	23.2509	15.723	7.88295	15.4172
1179	CGCCGATGCCGCCAGTGCTCCAGACGCCAGGCCGAGTGGCCCTGGTGGCCACGTCGCTGCGCCTTTCCCTTGGGGGAGGGGCAAGGCCAGAGGGGGTCCAAGTGCAGCACGAGGAACTTGACCAATTCCCTTGAAGCGGGTGGGTTAAACCCTGTAAATGGGAACAAAATCCCCCCAAATCTCTTCATCTTACCCTGGTGGACTCCTGACTGTAGAATTTTTTGGTTTAAAGAAGAAAAAAATAAAGCTTTGGACTTTTCAAGGTTGCTTAACAGGTACTGAAAGACTGGCCTCACTTAAACTGAGCCAGGAGAGCTGCAGATTTATTAATGGGTGTGTTAGTGTGCAGTGCCTTGCAGGAATTTAAACTCTCTACCCTTAAAGAAGGAAATGTATTTG…	886	chr7	25988640	25989525	-	CTD-2227E11.1	none	10.302	39.4	1.36184e-05	1.78647	11.7455	13.2845	4.82914	10.3413	16.7496	6.80616	10.0051	8.65459	84.2792	35.5365	32.1084	19.9044	38.4867	35.0905	31.3585	23.9325	23.6318	34.1766	106.033	54.3086	51.5564	23.0604	8.67124	28.2648
103847	ACAAATGATCGCTGATAGAGTCTGCATAAAATCATCTTCCTCTATCTGACAGCCATGAGCAGAGCCTTGGGGGTAAAAAAAGCCACAGCCTTAAATCTCTTCACTCAGAAATTACCATGAAGATAAAATAAATAAATGGAAAGGACTATCAAGAAGCCAACAAAACATAAACACCAAACCAACTCATCTTGTTTCACTTTGGAAATAAACTGTTCCCAGATGTGAGACCAACAAAATTAATATTAAGCAATTAAACCAGTAAATTATAAACTGATTTATCATTTGGGAAG	290	chr5	120125802	120126091	+	CTD-2334D19.1	none	1.01832	16.4322	3.11011e-05	2.79629	2.93637	0	0	3.44711	1.76312	0	0	0	19.8861	6.80485	24.8581	10.5376	0	0	7.83963	2.90091	21.7413	45.2013	14.6253	5.84862	10.1091	40.8798	1.57659	50.1058
20565	CCTGTTGCTGGTATTTCAATTGACTTAAGCCAACTATCCCTTCAGTTACAATAGGAAAGTGCCTCTAATAAGGCCAAATATGCGTACTAACTTGTAGCAACCACGTGTCCGTGCAGTGCCACAGGAGCTAGAGCAGTGACAATGCTGGTGGCAACAGGGCAGTGTAGCAGGTGCTTCATGTTCACCTTTTCAACCTTTTCATTTAATTGTCACAACTCGGAGGTGGATTCTGTTAGGGACAGGCTGCCCCAGGACCACTCCGCCCCCGCTAACTCAATGCAGCTGACCCTTACCCTGAATACTCTGCAGCTGCATTCCTGAACCGTTATCTAGGCGCTATAGCAAGGTCACCAGACTTGCTACACCGAAGCCCTCTGGGTGGCACGGGGGAGGTCATGA…	530	chr4	53579700	53580229	+	DANCR	none	211.251	467.937	0.00836777	1.07727	364.109	274.144	216.345	72.3894	203.64	224.603	168.419	166.36	751.884	250.267	305.548	364.134	816.385	591.139	484.315	254.555	275.074	381.455	516.454	579.849	1001.81	401.46	118.244	394.423
116960	TTGGGGAACATAGAGAGTACACCTAAGTTCACATGAAGTTGTTTCTTCCCAGGTCCTAAAGAGCAAGCCTAACTCAAGCCATTGGCACACAGGTGAGACACCTCTATTTTGTACTTCTCACTTTTAAGGGATTAGAAAATAGCCAAAGCAATGATGATTATCTATGTTAGTGCTTCTCTCCCCTCTTTTCAAATGAGAATTTTGCTCTCATATTGATACTAAGTTTAATACTGAAGAAAATGTGAAAACAGATACTATGATGGTTGCATAGTTCAGCAGATTTAATCATGAAGAGATGTACTATCTGTCTGATGTATCTGGGGTAGTTGTGGTTTGCTGTTAATGGTTAAGCAGTGTACCACCAATCTACCATTAAAATATTTTTTGCTGACAATTTTG…	546	chr1	173835212	173835757	-	GAS5	none	16.7563	49.4456	2.80984e-05	1.47277	19.0864	19.323	10.6241	5.17067	17.6312	13.6123	21.6777	26.9254	34.0904	40.8291	59.0381	48.0048	83.971	109.32	56.6196	23.9325	50.0995	20.947	35.6491	47.6245	52.5673	44.0244	29.1669	55.2449
81988	CGCTGATGAGCAATATTAAGTCTTTCGCTCCTATCTGATGTATCTGGCGGTAACATTCTAGTTTATGCCCCGAAAAGGGGAATATAGCCATTCTATAATGTTTGGAGATTTTGGATTACTCCTAATTGTATGCAAGTTGTCTTACTGTGTATTGTCCCTTAATTTCAGGACTCAGAATTCATGATTGAAGAAATGCAGGTTAGTTTAAACTTTGAA	216	chr1	173833795	173834010	-	GAS5	none	35.2132	77.0118	0.000167992	1.09306	36.7046	47.0997	30.9065	18.9591	37.907	27.2246	30.0152	52.8892	123.104	63.512	67.3241	59.7132	109.629	97.1736	87.9781	46.4146	74.6766	76.0705	53.0165	127.834	62.6764	64.9883	40.9913	77.0859
83124	TTGGGGAAAGTATGGTGGGAAGAATGAAATCTAAGAGGTGGTCTCAGCCTGTGATGCTTTAAGAGTAGTGGACAGAAGGGATTTCTGAAATTCTATTCTGAGGCTTTAATGTTAACAGCATTTATATTTAACGTGACTGCTGTGAGGTTCATTCTCACTGTTTTGCTTGCATCTTTTTGTTTTCTAGTTGTGTCCCCAAGGAAGGATGAGAATAG	215	chr1	173835907	173836121	-	GAS5	none	5.60924	18.9294	0.00031724	1.5891	0	8.45379	6.76079	0	7.05246	1.51248	6.67005	14.4243	17.9922	24.9511	22.7866	11.7085	39.653	24.2934	19.1635	7.97751	23.6318	15.4346	12.7971	15.0393	9.09818	18.8676	18.9191	20.5562
62100	GAACTCAAGCTCCATGAGGAGATGTTTCATTGTCAGTGAGCACATTCTTGTCAATTAGTTCCTTCTTGTTTATTAGTATAGCCCCTGTGTCTAGAACCTTTCCAGGTATTCAGTAGCCATTTAAAAATTATTTGTTGAATGAATTGTTATTTTAAAGAACATCCACAAGTTTTGCCTGACTGGGCATGGGAATACATGCCCATCTTTGGACTGAATGTCCATTTTTCCCTTCTTT	235	chr6	26894317	26894551	-	GUSBP2	none	60.4765	182.399	2.137e-05	1.50055	61.6637	53.1381	65.6762	86.1778	66.9984	77.8927	36.6853	35.58	97.5366	111.902	391.516	114.743	96.7999	174.103	296.164	92.104	351.642	67.2508	168.19	187.156	237.564	208.592	180.52	142.609
68602	AAGAGTGAGGTAATATCATTTTGATATTACTATTTGCAATGACTTTTTGAATATGACATCAAAAGCACAGGAAACAGAAACAAAAAATAGGCAAGTTGGACTATATCAAACTAAAAACAAACAAGAAAAACAAAAACCAAGCAAACCTCCACACAGCTAAGGATACAAGCAACAGAATGAAAAGGCAATCTATAAAATGAGAGAAAAT	208	chr6	26840418	26840625	-	GUSBP2	none	7.16081	21.8316	0.00100302	1.44569	2.93637	3.62305	8.69244	6.89423	12.3418	9.07488	10.8388	2.88486	19.8861	33.2682	53.8593	22.2461	18.6602	21.5941	29.6164	6.52705	15.1244	6.61483	14.6253	39.2693	19.2073	14.6748	21.284	12.8476
109997	TCTTACTTGAAGCATGTCTTTCAGAGCCCGGCACCACCCATCTTGAGTATCTGGTGAGTTCTGTGGTCTGCATGTCCATGTTTGGGACATTCTGGGAAGGGTGGCCCAGGCTGTGATTTGCCATCTACTGCAGGCTATGGATGGTATTCAGAAGGGAGGGGAGATGCTGTGTGCGTGTTCTGAAGGGTTTCCCACTAAACAGATCAACCCTCTCCATAACTATTTGATTTTTACTTTATCTCCTCGTTGACTTCACAGTGTCAGTGCAGTTTGTGTAAACATCTCTATGGGGTGATGCATGCAGATAAATGTTTATGTGAACATATAAAGTCTGCATGTGTGGGTGAACACTCCACATCAGGTCATTGTCCATCATTACATATCTGTGGTGTCTGGCTC…	594	chr19	36806318	36806911	-	LINC00665	none	10.6747	29.3925	6.72851e-06	1.3779	5.87273	8.45379	19.3165	10.3413	11.4603	10.5874	11.6726	7.69297	40.7191	31.756	39.3587	26.9295	41.9855	33.7408	40.9403	21.7568	23.6318	27.5618	31.9927	18.3814	34.3709	15.723	26.0137	15.4172
20287	CCAACTAGAAACATGGGTCCCCAGGGCTGGGTCAGGCCCCTTAAAACTGCACCTAAGTTGGGTGAAGCCATTAGATTAATTCTTTTTCTTAATTTTGTAAAACAATGCATAGCTTCTGTCAAACTTATGTATCTTAAGACTCAATATAACCCCCTTGTTATAACTGAGGAATCAATGATTTGATTCCCCAAAAACACAAGTGGGGAATGTAGTGTCCAACCTGGTTTTTACTAACCCTGTTTTTAGACTCTCCCTTTCCTTTAATCACTCAGCCTTGTTTCCACCTGAATTGACTCTCCCTTAGCTAAGAGCGCCAGATGGACTCCATCTTGGCTCTTTCACTGGCAGCC	350	chr19	36816189	36816538	-	LINC00665	none	10.2403	32.2766	7.9669e-05	1.54257	8.8091	19.323	13.5216	6.03245	7.05246	7.5624	10.0051	9.61621	20.8331	22.6828	26.9297	43.3214	34.9879	62.0831	33.9717	28.2839	22.6866	70.5582	17.3675	15.8748	22.24	30.3978	10.2478	53.9601
4438	ACTCAACAGAAGAAGAAAACTGGCCTCAGAACTCAGAGCCAATAAAAATCAGGAAGGTTGGTGGATTCTTCCTGACTCTAGAATCTTCATACCCCGAACTCTTGGGAAAACTTTAATCAGTCACCTACAGTCTACCACCCATTTAGGAGGAGCAAAGCTACCTCAGCTCCTCCGGAGCCGTTTTAAGATCCCCCATCTTCAAAGCCTAACAGATCAAGCAGCTCTCCGGTGCACAACCTGCGCCCAGGTAAATGCCAAAAAAGGTCCTAAACCCAGCCCAGGCCACCGTCTCCAAGAAAACTCACCAGGAGAAAAGTGGGAAATTGACTTTACAGAAGTAAAACCACACCGGGCTGGGTACAAATACCTTCTAGTACTGGTAGACACCTTCTCTGGATG…	469	chr19	36817162	36817630	-	LINC00665	none	8.9323	24.2734	9.9754e-05	1.37491	10.2773	12.0768	14.4874	7.756	4.40779	6.80616	10.8388	4.80811	16.0983	15.878	32.1084	12.8793	17.494	26.9927	31.3585	28.2839	15.1244	27.5618	20.1097	20.8879	21.2291	52.41	16.5542	33.4039
53685	CACAAACGTGTGTGATGCTCCAAAGGGCTGGAGAACCTCTCTCTTAAGTGGATATTTTTCCCCTCAAACGACTTCTCAGACATGATCCTCTCTGAGGTTGGTCCTGGGCTTCCATACGTGATTCATGGAAGAGGTCTCAGCCCCAAGAGCCCCTGAGGGTACTGTCCACTCCCCCTGGAAACTTCCAGAACCTGACGTGGGGCTGAAGACATAGAGGT	218	chr22	46439441	46439658	-	LINC00899	none	5.91955	22.615	0.0041105	1.6688	10.2773	9.66148	0	4.30889	6.17091	3.02496	3.33503	10.5778	107.006	8.31704	24.8581	5.85424	15.1614	29.6919	39.1982	9.42796	13.2338	6.61483	22.852	12.5328	12.1309	17.8194	6.30636	30.8344
40051	AGAAATTGCAACAGCCAGTTCAACCTTCAGCAACCACCATACTGATCAGTAGTCATCAACATTGAGACGAGACTGTACACCAGCAAAAAGATCCCAACTCAATGAAGGCTCAGATGATTTTAGCATTTTTTTAGCAATAAAGCATTTTTAAATTAAACTATATACATTGTTGTTTTAGACAAGTTTTTGCACATTCAGAATACAGTAAAGTGTAAACATGACTTTTATATACACTGGGGAAACCAAAAAATTTGTGTGACTTACTTTATTGCAATATTTGTTTTATTGTGCTGATCTGGAGCTAAATATATCTGAGATATGCTTGTACTGATGATTATTTTAACACCAAGATATTTTAAAATTCATTAAATAAATGTTTATTTAAATAGACCTCTAGCA…	432	chr5	116814674	116815105	+	LINC00992	none	18.608	90.6559	9.91533e-07	2.07719	20.5546	19.323	21.2482	1.72356	17.6312	38.5682	12.5064	17.3092	138.256	37.8047	53.8593	96.0095	240.25	80.978	87.107	58.0182	77.5124	30.8692	95.0641	99.4266	34.3709	148.844	44.9328	127.192
3223	TAAAAAAAAAAATGGGCTTCACAAATATTAAAAACTTTAGTGCATCAAAGGACATTATCAAGAAATTGAAAGGCTCTCTGGAAGAATGGGAGAAGATATTTGCAAATCATATGTTTGGTGGGGGAACAGGATCCATAATATATAAAGAATTCCTACAACTCAGCAACAAAAAGACAAACAACCCAGTTAAAAAGTTGGCAGAGGACTTGAATAGATATTTCTCTAGAAAATATACAAATAGCCAACAAGCACATGAAAACATATTCAAAATCATTAATCA	280	chr5	116815589	116815868	+	LINC00992	none	1.90319	12.5424	3.9006e-06	2.2698	0	0	2.89748	0	5.28935	4.53744	2.50127	0	15.1513	9.82923	16.5721	7.02509	29.1566	4.0489	14.8082	6.52705	13.2338	4.40989	11.883	18.3814	9.09818	11.5302	11.0361	17.9867
45373	GTGGAGAATTACGAAATAAGTATAAATCTTCATAGTATAGGTAAACTACACTTTCAAAAAATAATCCTGTAGAGGAAAGAGGCAGTATCTTTTAAGACTCACCATCAGTTCCAGTCTTTGACCTTTGAACTTTTCCTGTTTCACTTTCATTGGACTAACTCTGTATGATTCCAAAGTTCATTCTCTGAGGTGGAAGTTATAATGACAGTTCTACAAAGCTTTTATTTTTTCCTCACCC	238	chr5	116811661	116811898	+	LINC00992	none	1.49212	10.223	1.8328e-05	2.3135	0	2.41537	4.82914	0	0	3.02496	1.66751	0	16.0983	9.82923	6.21454	9.36678	9.33011	4.0489	14.8082	7.97751	15.1244	0	8.2267	11.6972	12.1309	20.964	12.6127	5.13906
73782	GTTTCTTTGGGTCAAAGGGAGCTCTCATTGCTACTTCAGTGTTTGCAGTGTGCAGAGTTGTAAAAGTTGAGACTAGCCACTCAAAATGCGAGCTTCTGGTCCTGACATTTCACGGGGAAAGGAAGGCTCATGAACCGACTGAGACATGGTTGAGCGGCTAAGATTTCTGTAGCTATGATGCTGCCATCCAGGCCGACTTCAGACTTGGGAAGTTTCCATGTGAGTTTTTGGAAGGTTTTGGGGTTTTGTTTTTGATGGAGGAAAAGAATGTGAAAGAGTGTTTGCACCAAATAGATTAAGCTGTTAGTAAACATGCACCCTTTAAATTAACTGATGATAAGGACAAAGAAGGTGCTTTGTCGTCGTCAACTGGATTTGTCTGAGGTCACAGAGACAAAC…	456	chr7	156395508	156395963	-	LINC01006	none	0.570624	14.1969	8.56773e-08	3.31801	0	0	2.89748	0	0	0	1.66751	0	21.78	27.9755	8.28605	25.7587	17.494	44.5379	24.39	8.70274	13.2338	2.20494	8.2267	4.17759	4.04364	4.1928	3.15318	8.99335
49789	CACGGTTAAGTGACATGACTAACTCTTTTTTCTTATCCTTAAGAGAAGGGGAGGAGGAATCAAAAGTGATTTTTTTCAGGTCCTTGGAATGCATGATATCAAGCATAAATTTTAATTGGCTTCATTTACTAAGTGTTGCATTACCTCATCCTCCAGTTTTAACTATGGATTTTCTATAAATCTTCATACGACTAAACATGATAAACTGCTCAACATATCACAGAACAAGGCAGTGCTT	238	chr7	156361144	156361381	-	LINC01006	none	0.241457	11.2406	2.56287e-06	3.25269	0	0	1.93165	0	0	0	0	0	11.3635	23.4389	8.28605	14.0502	26.8241	31.0416	27.8743	12.3289	8.50746	3.30741	1.82816	0	6.06546	0	2.36488	2.56953
7660	AGTGCTTCAAAGATTAATTTACTAAACATATAATCTGATGCTTTTAATTAATCACATGCCATAGTGTAAAGCTCATGACATAACCTAATGGTCAAGACCTGCAATTGATGAGCTATTAATTACCCATTAACTCATCCACTCACACGACCTGTAGATCCATCAGCTTGATTGAAAGTAGAGACCTAAATGATCCTAAAAGGTATTTTATATAACTTTCACAAAGAATTCCAGGAAAAGTTGATTCTTGCATGAGCAAGAGCGCAGAAAAAAAAATGACGAATTTTCCATGCATGTTCCTGCCCTCCACTCCAGAACAGGGAG	321	chr7	156361429	156361749	-	LINC01006	none	0.824031	11.4369	1.34059e-05	2.76886	0	0	4.82914	0	1.76312	0	0	0	12.3104	22.6828	6.21454	17.5627	11.6626	44.5379	20.9057	7.97751	10.398	2.20494	4.57039	3.34207	2.02182	5.241	2.36488	8.99335
77469	AGGGAAGAATATTTCTCAGCCCTCCGTTCTCAAGACAGATGAGTGCTTTAGAAAGAGGACTCTGCAGCGGCGAGGAGGATGGAATGACAGGCAAAGCACGCAGGACCAGGAGATGGCTTCGCTCCCTCAATCACTCATCCAAAGACGTTTAATGAGCACCTATTGTGTGTCAGGCATTGTACCGGGCAATGGGGATATCGTAGTCAGTAATAAGTGAGGAGAGATGAGTTCATTTGTGAGAGGCTCTGACCAGTGGAATCAGAGGAAGGGAGTTCCCCTGGGTGGGCCAGGTTCAAAGACATTTTGGAAGTAGAATCTGCAGAACATGATGATCTTTTGGAAACAGGGCAGGGACGTGAATGAGCACGTAATGTCCCCATGGGTTTGTCTTTCCGAAGG…	1100	chr7	156264308	156265407	-	LINC01006	none	2.29604	17.2674	1.94308e-05	2.39795	0	4.83074	3.86331	1.72356	3.52623	0	2.50127	1.92324	44.507	14.3658	8.28605	35.1254	19.8265	16.1956	20.9057	8.70274	20.796	23.1519	31.0787	7.51966	10.1091	0	1.57659	14.1324
96124	AACTGGAAATAAAATTTTGCAGGATACAAGGTTAATAATAACTGCCTTTCTATATATGGTCATTAAACAACTGGAAATAAAATTTTAATAAATGCATCACAGATAGGAAATTTCCATGCATAACTGTAGTGAAAAATGAGGCGATCTCTGTGCTGAAAATTAGAAAACATGATAGAAATAAAGGAAAGAAGAGCTTCATCTATGGACAGACTTGCTGTGCCCATGAACGAGGTGTCATGTTATTGTAAAAATGTCATT	258	chr7	156386013	156386270	-	LINC01006	none	2.32413	14.7839	5.74246e-05	2.19962	0	0	5.79496	6.03245	1.76312	0	5.00254	0	20.8331	35.5365	10.3576	17.5627	20.9927	40.489	20.0346	9.42796	9.45273	5.51236	7.31263	10.8617	7.07637	6.28919	7.09465	7.70859
95303	TATGAGCTTACGTTTTCAGCCCAGTTAAGCCTGTTGGTTTATTTAAGGTCACATGTTTGGGGACTGGGGTATTGTGTTTTTTATTTTATTTGTATGCCCCAGGGAATACAAAGGGCATTGTGTTTCAGTGAATGTTCTGATTCATTGAGAGTTAACCATGGAGGATTATTCTTTTTAAACTCAAAAATCATTTTGACCCTTATCTGAAATTGGAAGGATCTGGATTTGAGAACCAGCCATCATTTACCAGCTTTTTGAACTTGG	264	chr7	156359320	156359583	-	LINC01006	none	1.63717	12.2022	0.00120277	2.17394	0	4.83074	0	2.58533	0	1.51248	4.16878	0	17.0452	38.5608	5.17878	14.0502	15.1614	26.9927	36.585	5.80182	10.398	2.20494	4.57039	5.84862	3.03273	2.0964	0	7.70859
36380	ATTAACCATGTCAGAGTTTTTCTACTGAACTCTGGGGTAAATGGTGGGAAGGAACAGATTTGGGAGCACCAGCACCCCCAGGCCTCCCCTGGCCACCCCAAGGAGCAGGTGATCAATATCTCAGCATACCTCTACTTATTTGTGGCACCCCAGTGTGTCTTAGGCCTTAGTGAGCTGTGAGGTGCATGACCTTAGGTAAGTTACTTCTCTGATTTTCAGTTTCCTTATCTGCAAAATGGAGACCTTAGGGAGTTAATGTGGGTATGAGAAATGTACATAAAACATATTGCACAAGGTGAGGCATGTAGTGTATGCTAATAAATGGTAAGTTGCTGCTGCTATGGTTGTTAACAATAATTATAAAAAGCAAATGGAAAAGGCTTGAATTGAAAAAAATTT…	481	chr13	52764035	52764515	-	MRPS31P5	none	1.79935	13.8602	2.71178e-07	2.4773	0	0	0	2.58533	3.52623	3.02496	3.33503	1.92324	37.8783	9.07314	13.4648	12.8793	8.16385	18.8949	18.2925	17.4055	7.56219	4.40989	10.0549	17.5459	10.1091	10.482	16.5542	8.99335
102504	CGGCTGCAATTTTGCTACTCGCTGCTCGGCATGGAACGGTCAGGTACCGCAGTTCAGCGCTCTTGGCCCCGCAGGTCCTCGGGCATCCCCGTGCCCCGTGCTGTACATTCAGTTATCCTCCGACTTCCCGGGGTCGAAGGTATTACCTGCTGGGTTTTAGAATCTATTGCTTTACATCTGAGAAAAGAAAAATCCCAGAAAGATAAGATGACTTGCCCAAGATCATAGCGTGCCTGGAAAACAGTGCTCCGATTACAAGCTGGTCGCTGTGCCTCATTCGTCTTGTCATCAACTCCTGTCAGTTTATCCAAGCTCCAAAAGCGAAGTTGTTTTAGCTTTTGCTTCCCAAGATTTATTTGATAGTCTCATTTCTGTTTCCTTCGTTTATTCTTTCGTTCA…	1511	chr13	52766921	52768431	-	MRPS31P5	none	2.07298	18.1793	3.74453e-06	2.54899	0	0	2.89748	2.58533	4.40779	2.26872	2.50127	1.92324	93.7487	15.1219	16.5721	4.68339	6.99758	25.643	20.9057	19.5812	21.7413	5.51236	12.7971	11.6972	10.1091	8.38559	7.09465	10.2781
46202	TCTGAAGTTTGCTCACTCATAGGTCTGGCAGTTGATGCCAGCTGTCAGCTGAGACCTTAGCTGAGGGTGTTAGCAGAAACACCTACATGTGGCTTTCTTTGTGGCCTGGGCTTTCTCACCGCATGGTGGCTGGAGGATTTTGATAAGTGGATAAGCCCATGTGACCCAGACACTTAACCAAGACACTGTGTTTCCCATTTTCAC	204	chr13	52761572	52761775	-	MRPS31P5	none	0.732616	9.2212	1.02353e-05	2.70492	0	0	0	2.58533	1.76312	1.51248	0	0	17.9922	7.56095	12.4291	5.85424	3.49879	12.1467	18.2925	20.3064	11.3433	3.30741	2.74223	12.5328	8.08727	0	6.30636	5.13906
59929	AAGTAGGGACTATGAAATTCTTATTTACTAATATATTGTCAGTACCTAGTATAGTGCCCAGCACAGAGTAGATATTCACTATATTTAATGAATGATTTTTTAAATATACCCTCTTACTGAAACCAACACATTCAGAATTTTTAAAGATCTTCAGTAATCAAATACCAAAAGAGATTTTTAACCCCACAGAATAAAATTGGGTATTTGGGTTACTTAGAATTAGGACATCTTTTGCATGAGTCTAATATAGATGTAATCATTTGTGGTGTTCTCTTTCATAAATGTATCTAATGAAGAAAGCAAAAATGACATTTCTAGCCATTGATTATTCTCTTTTCTGTTCCATTTTAGCTTAGCTTACAGGTGGTTATGG	373	chr13	52765020	52765392	-	MRPS31P5	none	3.39326	19.7029	1.98602e-05	2.15781	0	0	6.76079	4.30889	4.40779	3.7812	5.00254	2.88486	77.6505	15.1219	14.5006	9.36678	9.33011	35.0905	12.195	37.7119	17.0149	6.61483	14.6253	19.2169	10.1091	11.5302	11.0361	14.1324
105043	TACAGGTGTGAGCCACTGCACCCGGCCAATATTAACTTTAAATGTAAAATAATAGATTATTTTCCTAGATTGTACCATATATTGAATATTATGAGAGTCCTTGTGTACTTAGTATGAGGATACTAGTTTGCAATTGTTTTTTCATTCTAATTTAAAAGTGCCTGATTTGATAGCCTCTGACGTTTTCATAAGCAGATCAAATAGTTTGTTTCAGCATTTTTTGAAATTGCATTTTCTCTTTCATGCAACTATCCTTAGCCTGTGGCTACCATTTTCTGGCTTTGAGAACTTGATATGGTATTAACCTAAGGTCGGATACGGCTCTTGAGCTCACCTGCATCAGAAGCACCTGGGTCTAATTTAACATGCTGATCCCTGAACCCCATTCCAAACTTACAA…	595	chr13	52765848	52766442	-	MRPS31P5	none	1.49023	14.6746	2.64888e-05	2.53561	0	0	1.93165	4.30889	0	1.51248	4.16878	0	72.9157	9.07314	9.3218	8.19593	5.83132	12.1467	18.2925	16.6802	9.45273	6.61483	16.4534	5.84862	0	12.5784	13.401	17.9867
13638	ACGACAGTTACTAAAGAAGCACCTGAACAGGTTTGTTAAGAATAACTGTTTCTCAGGTGGAGAAATATTCCATCTTTACAAGATGTCCTGAAGGTTTTGATGGTGTAATAGTCGGATATTTTAATATTCCCTCCTGTCATTGGCCTGGATCCGAATGATGAATGTGGCGGTTGTTAGAAGGAAAACTCGGGACTATAACGTCCCCCCAAATTGGGAAGGCATCGAGAGACCAAAGAATAATTTGGGCAAGTCCA	254	chr13	52754493	52754746	-	MRPS31P5	none	3.60217	13.3483	0.000206406	1.65817	0	2.41537	2.89748	4.30889	0	6.04992	8.33757	4.80811	32.1965	13.6097	13.4648	8.19593	5.83132	17.5452	13.9371	22.4821	9.45273	7.7173	14.6253	10.8617	13.1418	10.482	11.0361	8.99335
83926	TTACAGGCGTGAGCCACCACGCCTGGCCAAGTAATATCTTAATATCATGCCATTGACATTTATCCTCTAATTATTTCAGAGGTGGCCTTCAGAAGAAGGCCTCTTTGGTAAAATTGCTATTGAGGATATTTCACTGAAAAACAAATTTATCTTTAAATTTAAATCCAGGAAAAATTTAAACTTTCAGGCTTCTATTTTTATCAGACAGGGTAAAAAATTTATAACTCAGAATATTACCCTTTCCCCTCTTTGTGTGATGGATTGCTTGGTTTTAGTTACTGATTATTTAAAATAATAAGTTATTCAAATCTAGGATTTTGATACAATAGTTCTTCTCTAGAATATAGTGTGTGTGTGAGAGTATATTTAAAATTTTTATTAAGGCCCATGGGGCAGCCT…	560	chr13	52742285	52742844	-	MRPS31P5	none	11.407	34.5206	0.00058455	1.47417	11.7455	15.6999	15.4532	6.89423	11.4603	11.3436	10.0051	8.65459	121.21	21.9267	22.7866	16.3919	18.6602	49.9364	33.9717	36.2614	36.8657	45.2013	42.9617	23.3945	20.2182	20.964	9.45954	32.1191
122304	GTGGCATGTAGCTTGATGAAAATGATGATCAGGTTAACACCCACTCAGTTTTTGAAAGTAAATCTTTTTGATTGATAGAAATTTATTTTCATATTTAATTATAACTTTTTTTTTAAATTGAGACGAATTTTGCACTGTCGCCTGGGCTGGAGTGCGATGGTGTGATCTAGGCTTACTGCAACCTCCGCCTTCCGGGTTCAAGC	203	chr13	52764806	52765008	-	MRPS31P5	none	2.62577	10.5237	0.00178344	1.71121	0	3.62305	3.86331	2.58533	1.76312	0	9.17132	0	35.0374	9.82923	6.21454	9.36678	5.83132	8.0978	13.9371	15.2298	11.3433	8.81977	8.2267	8.35517	3.03273	8.38559	10.2478	6.42382
111799	GTGAATTCAATTAACGTTTGTTCGTTAGAACTGAAGGTGAAGCTAAAAGAACAACCCCCTGTATTACAAAAACTGCATTCTGTTGTGTATGATAAAAAGGAAATGCAAAATGCATAGGGACAATGAATCACCTCTCCCCTGCTCAAATGGTATCCGTTAAGTGTGCATCAGAAAGGAATTTTTTGTCAGGGCAGCTGCTGTTGTCCAGCCAAAAGAGATACTTGGATTCCGGAA	234	chr13	52752894	52753127	-	MRPS31P5	none	2.78874	9.20405	0.00286317	1.59941	5.87273	4.83074	4.82914	2.58533	0	2.26872	0	1.92324	17.0452	13.6097	8.28605	5.85424	4.66505	6.74817	19.1635	11.6036	15.1244	5.51236	2.74223	9.19069	3.03273	5.241	7.88295	11.5629
123019	CAGCCTTGAAAACTTTTTCAGGTTCTTCCAGGGTTACTGGGCTATTAAATATTTCTATTTCATTATAAGTCAGTTTTTCAAAGTTATATTATCTTAATTACCTTTTTTATATGTATTAGTGTAGAGTAGCATTTTATATTTTGATATCCTCCTTATGCATAGTTTTTCACTTTTTATTCCTAGTTTTTCGTTTTTAATAAGACTTTCAAGAAATTTATTTTATT	224	chr11	65208931	65209154	+	NEAT1	none	13.7041	39.5042	0.000901389	1.42106	19.0864	13.2845	15.4532	9.47956	7.05246	6.80616	12.5064	25.9638	22.727	103.585	77.6817	37.4671	33.8216	33.7408	26.1321	24.6578	37.8109	16.5371	9.14078	35.9273	28.3055	40.8798	39.4147	64.2382
93262	ATATATGAAACTTAAGTTTCTGCTAGTTGCCATCTTTGATCTATCATGTATGCAGTGACCTACTAAGACTGTAATTGGTACAGTAGATTCTTGTCATCTGTGTGTGAATTTAGCATTCATGGGCTTAATGCTGACAAGGCCCCCAGGGTCCAAGACATATAATCATGTATAATTTTGTCAAGGTATAATTTTTTAAATTGCTTTTGTCATGTGTCTGCTGGTGATGCCCAACC	233	chr11	65202288	65202520	+	NEAT1	none	46.2591	149.464	0.00743764	1.48006	41.1091	31.3998	53.1205	47.3978	35.2623	24.9559	48.3579	88.4692	89.9609	418.12	626.632	87.8136	71.1421	40.489	101.044	104.433	60.4975	29.7667	22.852	169.61	105.135	183.435	193.132	87.364
37852	TGTGCTCACCATTTCCATCCTTAAGATTCTCACAGGGAAGAACCCACACAACAGCTTTGTCCCTGCGACTCTGGGTGAGTTTCTGACACTGGCCTGGGCTCCCGTTTTGCCCGTCACCAACTTCTCACAGTATAACTATCCAAGAGAAGTAGCATTTGATGTCAGGGAATCAAAAGGGCTAAGGCTCGGGAGGCCAAGGCAGGTGAATCACTTGTAATCAGGAGTTCGAGACCACCCTGACCAACATAGTGAAACCCCATCTCTACTAACAATACAAAAAATTAACCAGGTGTGGTGGCAGGTGC	305	chr13	95932241	95932545	+	none	ABCC4	15.0542	229.205	2.84984e-06	2.94948	2.93637	2.41537	15.4532	1.72356	51.1304	2.26872	35.8515	8.65459	127.839	51.4144	172.971	4.68339	461.84	244.284	543.548	79.7751	205.124	214.982	5.48447	493.791	220.378	14.6748	203.38	623.111
81545	AAAAAAACGTGATCTAATAGACAATCCAGATATAAAGAACACAAACCCTTTTCCCTACAATTTAACCAAATGCTAAAATGCACCAGGAAACACAGGATACTACAGAGATAAAGATTTGGCCAGCAGATTATCAACCCCAGGAAAAGAAATCCATTTCTGTAGCATGCTATGCTGTTGGAGGCACACGTCACACTTCTTAATTCAAGGACAGAAAAGCACAAACTAAAATGCACGCTGGAGTATGACTCCCCCTTCTCTATCTGCTAAAGCGCTTCGCATGTGACTTTCAATCTCTAAGCTGGGAATCAATCAGGCAGCCCAGCCTCCTATATTTTCTAGTTGTATTGCTTTGAGCATCAAATTTAACCTCTGTGCACCTCAATTTCTTCAGCTGGAGAC…	983	chr13	95931257	95932239	+	none	ABCC4	14.4678	220.777	9.68042e-06	2.87028	4.40455	0	12.5558	1.72356	47.6041	3.02496	35.8515	10.5778	122.157	51.4144	183.329	8.19593	475.836	263.179	544.419	60.9192	190	223.802	3.65631	447.837	198.138	5.241	146.623	607.694
56461	AAAAAAAAAAAAAAAAAACCATCCAATTCCCAGAAGTCAAAGGCAATTCCTTCCCTTTTCTGTGTCTGTGAGACGGCTCTCTGTGGGATTCCTTCCTGCTGCACCTCATCCTTCCTGGAAGGGACTCTCAGAAAATGTGCCTCCTCCTTACAGGAAAGGAATTCCTCCCGAGGAACTGTGGACATGAGGCAGCTTTGTGGAATTTCCCTTCCACAGACTTCAGCCTATTTTCTGGGCAAACTTAGCAGAAATGACCAAAATCCACTCGAGAGAGACAGCAACAAGGAGAGGGGAAGAGATCCTATTTTGGCTTCTTCAAATGGACCAATTTTCTCTTTAAAATATTTATTTTAAGGAAAAACAAGGACTACATTATATTTTAAAGGGGGAGAAGGAAGA…	442	chr13	95932831	95933272	+	none	ABCC4	9.85225	131.899	3.67755e-05	2.71649	2.93637	0	9.65827	0	24.6836	4.53744	28.3477	8.65459	86.1731	19.6585	87.0035	3.51254	263.576	152.509	311.843	58.7435	139.9	131.194	1.82816	240.629	91.9928	4.1928	110.361	407.27
77412	AAGGTGCTGGGATTATAGGCATGAGCCACCTTGCCCAGCCAACTGAGCCACTTTGTGCCAGGACTAGGTCAGGTACTTGGGACATATACAGGCAAGGACACTGCCCACAGGGAACTGACAGTGTCTAGCAGCTACACAGATGACACGGCCTTTTCGGCAGACACCCCTGTCCCCTGTGCTTGGCAAACAGCAGAGACTCAAAAATGTATATGGTTTGACTCCCACTGGAACATAAGCCCCTTAGGGCAGGGACCAGGGTCACTGTATTCCCAGCACCTATAATCAAGAGGTACATGACGCTGCAGCTGAGAGCAGGGACTCTGTGCTAAGTTACCTACCTGGTTTGAACCTAGGCTCTGCCACTCAAAGGCTGTGTGACCGTGGGAAATAATAGTACCC…	446	chr13	95936706	95937148	+	none	ABCC4	2.12089	31.8538	4.24665e-05	2.74403	0	0	1.93165	0	8.81558	0	3.33503	2.88486	18.9391	9.82923	17.6079	0	52.4819	31.0416	54.0064	13.7793	36.8657	35.2791	1.82816	64.3348	19.2073	0	36.2616	118.198
68166	TCATCTGGCATTGAGAAACGAACACCAACAATAATGAGTGACAGAATGTTAAGAACAATAATTATACAGACTTGGACCTCCCAGACTGCTTGTCTGTAGTAATTCAGAAGGAAGCAAAGTATTCTGAAGTGTTTATGAAGATTGGTTCCACATCTGAAGAATTTTAGTAATCTTACCCAAACTCAACCCAAGAAATATGAGGAAAAGAGGGAGTAGTTCTATAATAAGCAGGTGGAATAGAGGGTCAAACTCCTTGGCGAGTTCAGTCTAACAGAGGACACATTACTGCCCTACAAAGCAGCTCTGGAAAATGACAACCAGTGGCACTAACTCCAGGCAATATCTTTGTGAGGCTTGTGGGCTGTAATATAGTCTGCTCAGGCTGCCATAAAAAAAAAA…	437	chr13	95933671	95934107	+	none	ABCC4	8.18678	89.5258	6.26174e-05	2.58852	7.34091	3.62305	3.86331	0	28.2099	3.02496	17.5089	1.92324	51.1357	13.6097	56.9666	0	178.438	95.824	206.444	45.6894	103.98	109.145	4.57039	171.281	55.6	8.38559	75.6763	255.668
24828	AAGGGAACAGGACAGCAAATATAAGGTGTGATCAGGGGAAAGGCATCATATATTGACTGTCCAGGAACAATGGATATCTGAGAATGTAGGAAAGCTAAGTTAGGACCAGGAAAAGGAGAGTATTAAATGCCAAAGAAGATGCCACCAAAGGTTCTGGAACAGAAAGCAGCAGAGCTATGCCTTGTAAAGATAAAGCCTGCAGTGTATTGACTGGGTTGGAATCTGGAATCATTGCGTGCCTCCAGTCAAGACGTGGCAACTGACCAACTACCTTTTATCACTGACCAGACTCTTCCCTACGTGCAGATAACTGAGGACGCAAGCCTTAGTTACTGGGTGTGGTGGTGCTATTAACGGAAAAAGGGAAGTCAGCCAGCAAAGGCTGACTGGGGCAATTTC…	433	chr13	95937939	95938371	+	none	ABCC4	0.741487	15.7371	9.63635e-05	2.76556	0	0	0	0	1.76312	0	4.16878	0	8.52261	4.53657	4.14302	0	26.8241	21.5941	29.6164	10.1532	20.796	14.3321	0	39.2693	13.1418	0	12.6127	46.2515
116924	TAATATGGGTGATAAAGGAGCAGGTCCAGACTTAGAGAAACAAGGACTCCCTGGGTCAAGCTCTGGAAGTGAAAGGCTTCTTCAAAGACAGGAAAGTCCCACTGAAGGTGGCTTTGGAAGTGCACCCTTGCAGCACAGCAACCTTCTTGATTTGCTCAAGAGCAGGGGTTCTGACAGGTCTCAAAGCACTTTGTTTAATGAAACAGAATCGAAAAT	216	chr13	95934495	95934710	+	none	ABCC4	5.41718	83.9479	0.00068894	2.51029	0	0	5.79496	0	19.3943	0	13.3401	4.80811	31.2496	26.4633	54.8951	0	169.108	94.4743	205.573	33.3605	93.582	81.5829	0	195.511	54.5891	4.1928	58.3338	240.251
121391	AACACGCCAAAAAGATCACACCAGCTCACCAACAATGGATCCAAACCAAAAAGAAATCTCTGAAATTGCCAGAAAAAAAAAAAATCAGAAGATCAATTACTAAGCTACTCAAGAAGGCACCAGAGAAAGGTGAATACCAACTTAAAGAAATTTTAAAAAGTGTTACCGGATATGGACAGAAAAATCTCCAGAGAAATAGCGTAAATCAAAAACAATTACAATTTCTGGAAATGAAGGACACACTTAGAGAAATGCAAAATACACTGGAAAGTCTCAGCAA	280	chr19	51346653	51346932	-	none	AC011523.2	0.807825	34.4576	4.4225e-06	3.22807	2.93637	0	0	0	3.52623	0	0	0	99.4305	37.8047	5.17878	0	38.4867	74.2298	112.368	4.35137	48.2089	0	10.0549	44.2824	10.1091	7.33739	5.51806	53.9601
29077	GAACAAACATGCTCTGATGCTCTAGAGAAACATCCATAAAAAGACAATCTGGAACTCAAAAGTGGCTAATACCTTTTTCAGGAGACAGGCAGAAAGGTAAGAGAGCCATGGATAATTGTCTCCTAACACCATTCAGTTCATGCTCTCGATGCTTCCCTACAGGATAATCTCAGGCTTCCCAACCAGGCATTCAAAGTGCAGGCATTTGGTCTGGGATACAAAACCCAGCCTCAGTTTACCTGGTTTTTTTGTTTGCTTGTTTGTTTGTTTTTGAGACAGAGTCTCA	286	chr19	51345178	51345463	-	none	AC011523.2	0.301921	10.7552	1.64045e-05	3.05303	0	2.41537	0	0	0	0	0	0	22.727	11.3414	4.14302	7.02509	3.49879	37.7897	23.5189	0	16.0696	3.30741	2.74223	14.2038	14.1527	0	0	11.5629
28350	AGTGGAGCTGTTCAGCAGGTCTCAAGACGCCGGCAAAATCACGGCTACTGTAGACAAAGGTCACCCCAAGGTTATAAACCCGTAAGTCCACGTGCAACAAGAGCTGCAGGGTCATGGAGGCCTGGGTGGAAACTGGCCGAAGACACGGCAGATGAGCAGAGCAGACAAGGAGAGGAGATGGAATGGAGGCAGATCTCAGAAAACGCTGGCAGCTACACTCCTGAAGAAACCTCCGGAAAATTGCTAAGCCGAGAACATTGTGTTTTAGCATACAAAGACTAAAGGAATATTGTTCCCACAAGCCCTGCTTGAGGAAATCACCAGGGAACAAATGTAGTCAACCAAAAGATGATTGAGAAAACAACAGCAAAAGAGCTGACG	381	chr15	85398148	85398528	-	none	ALPK3	0.208439	19.619	7.07857e-07	3.47731	0	0	0	0	0	0	1.66751	0	56.8174	10.5853	2.07151	8.19593	47.8168	31.0416	65.3303	3.62614	28.3582	3.30741	4.57039	1.67103	10.1091	3.1446	0	37.2582
61472	CAAACCTTGTGAAGATGAGCGTTGGGAAAGGAGTAGGAAGGTCCCAATTTGGAATTTTGACATCCTAAAAGCCTTGGGTGCCGCAGAATGAGTAAGCTGGAGGGTACTGTGTAAAGACCTCGGCTACTGCAGCAGAGAAACAGATCAAAAAAGTCAAGACCGGCGAGAGGAAAGTGATTGAAAGGCCATCACTGAAAGAG	200	chr21	42952408	42952607	+	none	AP006748.1	0.939189	42.6874	1.15028e-09	3.85456	0	2.41537	0	0	1.76312	0	3.33503	0	36.9313	9.07314	30.0369	11.7085	76.9734	41.8386	33.1007	29.0091	22.6866	68.3532	90.4938	26.7366	141.527	0	1.57659	62.9535
106551	GCCCCAGGAAGTAAAGTCTCTGCCTGCCTTCACTGCAGTTCACAGTTTTCCTGCTTGTGAAAGGGAGAAGCAACCCCTCTGCATAACACAAATGTTGTGGGCAAAATGGGTAACTGACTTGATTTCTATATTACAAGTCAGTGGCTTAGGTTCATACTCTTTTCAAACATCTCTTCTTACTGTCCAGGCAGCTACTACTACAGTGCTTAACCAGGGACAGGGAGTTTAGAATTCTGCATCAACCAAGTCTTTTGTTGACCATCAAGGACATTTGGAATTAAGCAAGCCAAGGGTAATCAATTCTGATGCTTTAGGCTATTAGACCACCCGTGGGGTTTGGGAGATATCTCCTGTTGTATATAAAATGGTACAATGGCTTCGTGTGTGACAAGCTCTCCT…	2448	chr18	24246456	24248903	-	none	AQP4-AS1	1.08011	24.3808	1.09109e-08	3.38941	0	0	0	3.44711	3.52623	0	1.66751	0	12.3104	27.2194	14.5006	2.3417	32.6554	29.6919	31.3585	20.3064	17.0149	23.1519	12.7971	18.3814	50.5455	61.8437	0	35.9734
103115	CACGATTCTAAATAACCAGTTTAGTTCATTATTTTATGAATCTGCAAGCTGTTGTAAATTTTGTATTTTCACGTACAAGTTCACATCTACACAATGACAAACACATAGGACATGTCTAAAATATTGTCAAACACCAGGCTATTTTGCCTACATAATTTCAAGTATCCAGACACACCATTTAGCAATTTCCAGTGATTTGATTTGGCTCAGAATATCCAAGTTTTTATACCACAGTGAAGGAATCTGCAATGAATGGGGCATTTTAGCTGTGCCGGACAAAGAATGGTGATCAGACCCAGCTCCCACTCACGCTGGGTCTTCAATGTGATCAACACATTGACCATGTGGTCAACACAAGGTCCTGGGGTTTCTGCCCCACTTCTTTATGGGCCATCGTGA…	545	chr18	24245161	24245700	-	none	AQP4-AS1	0.416878	13.8773	1.40685e-07	3.3875	0	0	0	0	0	0	3.33503	0	6.6287	24.195	4.14302	0	8.16385	16.1956	17.4214	15.955	9.45273	11.0247	9.14078	10.8617	56.6109	17.8194	1.57659	12.8476
111710	GGGATTACAATTCAAAATGAGATTTGGGTGGGGACGTAGCCAAACCATATCAGACATAAAATAACGTTACATCTTACAGTTGACGGCATCTTAAATTCCATGGTGTAGAATGTGCTGCTTAATGACACAGTCAAGGTGGAAAAGCTCTGGCTCCTATGACATTTTCACTCTCATTTCCCTTCCAATCTCAATCCAGAAGAGTGATTCTGATGATAGGGAGTAGATGAACAGACAGAAAGATGGAAAGTGCAAGACTTTTCAGGAAACTGAAACTTTCTTTTGTTGTTAGGAGAAGGCCAGGGCTAGGAGTCTTACTCTTACATTCACTTGGACAGGGTGGGAGACTTGAGGGACAGGGCTAGGTCAGATGCAGCCTAAACGGGAGCCACTTGTCTCTCT…	486	chr18	24254556	24255036	-	none	AQP4-AS1	1.50399	19.0949	2.51001e-06	2.81437	0	0	0	5.17067	3.52623	0	3.33503	0	5.68174	32.5121	5.17878	0	11.6626	28.3423	27.8743	26.8334	16.0696	16.5371	15.5393	16.7103	41.4473	35.6388	2.36488	23.1258
99131	TTCGCTTTAAGGGATTTCGACTTTCAAATGTATCTTTGGATGCAAAATAGACTGCACAAGAGGAGATAGCATAGAAGAAGGGAAAGAAGCGTTTGCTCCCAATTATGATCAGCTTACGTGAAACTGAAAATTTCTTTTCTTCCAGATAGAATATTTGATTAGAAAGGGGGCAAGTAGATTAGATGAGCTACCTTGCTGACATCAAGTGATCCTCTGGCCTCCATAACTAGAAAATGTTGCTGATAACTGATAGAGCTAAACAATATTAAAAGCTTCAGCACTACTGGTTATCAGGGGAACCTTTCAGCCTAATTGGAAAGCTCAAAGCTTCAGGCGTCTGAAATTTTTTGGTTTGGGGCTCTTCTACAGCATTCCAATGCAGTATATCTAATCAATAAT…	1692	chr18	24259991	24261682	-	none	AQP4-AS1	0.759001	16.1128	2.60684e-06	3.04902	0	0	0	4.30889	1.76312	0	0	0	4.73478	19.6585	8.28605	0	10.4964	16.1956	24.39	15.955	12.2886	12.1272	12.7971	10.8617	52.5673	47.169	0	10.2781
80598	GGAAGGAGGAAGGGAGGACTCCCACAGAGTAAGACTCACCAAGAAGCCCAAAAGTAGTCACGTACTGTGACTTTCACTACCGAGGAACAAGCACCCTGAAGCCCCTCTACTCCTTTCCCCAAACCTCAACAACCCAAGCTGTATGTGTCTTATTGGGGAAATAACTTACAAAAATGAAAAAGCCCTTAGGTTTCAAATCCCAAACACCCAAAAGATTTTAAAAAGAAATATGCATACATCTAGTCACTGAGTAATAACTCGAGTTGCTAACACAATAACTGTAATTAGAACAACAAAGATTCTCTCAGGTTTTGCCTATGAAACATACTAGGTGCAATCGGGGGAGGTGATATGTTGATGCTTTATAAGCAACCCAGACTTAAATGCAACTTGGGTGAG…	1110	chr18	24251815	24252924	-	none	AQP4-AS1	0.543556	12.3728	3.88277e-06	3.03809	0	0	0	2.58533	1.76312	0	0	0	0	28.7316	8.28605	0	3.49879	10.7971	21.7768	14.5046	9.45273	15.4346	10.0549	13.3683	12.1309	41.928	1.57659	6.42382
44503	AAAAAAAAAAAAGAAAGAAAAAAGAAAATATTCATTCCTTTTCTTAAATGCATAAACCACCCAGAAAATATATACCTTAAAAATAAAAAAGGGGCTTAGTAAATATTTTATATTTCACTCAACTGGAATTATAATAGAAAGGGAAACTGTTTTATTAGAAAATTTACCATTTGCAGGAAGGTGTATGTGCCTATGCACCTCAGTCTTTATTAAGGCAATGGAGGAAAAACAGCCAGGAACAAGGTGAAAAGAAGTTCATTCACTGTCTCAGAAAATAAAGACCTCAGACTTTCTAAATGAAAATATACCATTAGCATCAGATACTAATCACAAGGTAGTTATTTTTAAAGAGGTTCCTAAGTAAGACACACACACCCATGACACCCTGAGGCTAATCTA…	2102	chr18	24262066	24264167	-	none	AQP4-AS1	1.34652	15.1107	4.02609e-06	2.71747	0	0	2.89748	2.58533	5.28935	0	0	0	11.3635	29.4877	13.4648	0	3.49879	14.846	19.1635	11.6036	17.0149	14.3321	14.6253	11.6972	26.2836	33.5424	1.57659	19.2715
9590	ATCTAAGGAAATGCATATCTTATTAAAAATGTTTCTTTAAAACAGCCACTGCATTTCTTTAAAAAGCCACTAGCTTTAAAATGGATAGCCTAACAGATTACATGGAATAATCTGAAAATGATAAGGTCTGAAGCTTAGCAAAGAATATATTTAATACATAAACTGGAGAATGTAGAAAATAGGATGGTATGATATGATTGATTGATTGAACTATTTCTTAGAGATTTCAATCAGCCCTGAAGTTTATTTCTTCCTATTTTGAAAACTGCATTTTCTTTTTTTTAAATTTTGTTTGTGAAGTGCTTGCTTATACTGATTTTGTAACTCCTGAAAGGCAAAAAGCAAATAATTA	352	chr18	24242711	24243059	-	none	AQP4-AS1	0.323167	11.4142	5.70714e-06	3.11577	0	0	0	2.58533	0	0	0	0	3.78783	19.6585	3.10727	0	4.66505	10.7971	9.58177	16.6802	7.56219	3.30741	8.2267	10.8617	40.4364	27.2532	0	16.7019
122138	AGGAATGACAATGAGAACTTGTGATGTCCATGAATTCAAAGAAGAAAAGGGAGAGTGGTTTTACACCTTCTCCACCACCTAACCCCAATCCTACTACCTATAAACCTGCAAAGAAGCAGACTGCTTGGGCTTGTGTTTGTCCTTTAATTTATTTATTATCAATTTTACATTTTTTCTTAAGTTTCTATCATAGGGTTAGTTCTTTCTAGATCAAGCACAAGGAAAAACCTCAGTTCTTTTGCACTGATGCATTTCTAAGAGAACGAAGACACAGTTCAGGGAGGATGAGTTGAATAACCCAGTATTTAGAAAAGGCATACCTCTAAATATGATTATGACAGGCCACTCTGCCATCAGCACCAATCTTCCTTACAAATAATTCACAAAATATAATCAAAG…	589	chr18	24245888	24246485	-	none	AQP4-AS1	0.533048	11.4663	6.38944e-06	2.97782	0	0	0	0	1.76312	0	2.50127	0	3.78783	21.1707	3.10727	0	11.6626	8.0978	13.0661	16.6802	12.2886	9.92224	3.65631	10.0262	38.4146	25.1568	0	6.42382
67582	CTCATTGATGGGAATGCACTATGTGGTTCATGACTACAGTTCCTCCTTATGGAAGCTAATGGTAATTAAATAATCCCATAAAGGAATACTTGCAAATCGATTAATACTCAAAAGAAAAAGTCCAGTGAACTAAGAGTGCTTATTACAGAGAGCACTGATCTGGTCCCAAAGGGGAGAAAACCTTCCCTAAGGAAGTGATATCTGAGCTGAAGGATGAACAGGCATTACTAGGCTAGAGGAAGGAAACAGCATTCTACTTACAGGAGATGCTTCTTGTGCAAAGGCTCTGGAGCAGTGAGCTGAGCTGGAAGAGCTAAAGGAGAGCAGCAGAGGGTACTCAGAGTGGGAAGACAGGAGCTTCATGAGAATGCAGAGGGAGATGGGCCAGATCAAGCAGGT…	435	chr18	24249045	24249479	-	none	AQP4-AS1	1.82819	19.475	1.08999e-05	2.63857	0	0	0	9.47956	2.64467	0	2.50127	0	8.52261	31.756	13.4648	0	8.16385	13.4963	24.39	29.7343	24.5771	13.2297	16.4534	16.7103	43.4691	38.7834	3.15318	25.6953
78299	AAACCACACTTTAATGACAAACTCCAGAAAGCTAGACCTTATAAGGACCCTACATATTCACCAGCTTCCATGGAATGGCCTTCATTTTCCACACGCTTTTGTTTTAGAAAACATATGAACTACTAGAAGTCACTCAAACAAGGAAGGATTTACATTCATTTTTTCCCCAAATAGTCTTTTAATATACATGTTTCTTGCTAGAAGCAGATTTTGTTGATGCTTTAATTTTTTTTAAAGCCAGTAACTAACTATAGCCTGACAATTTCTATCCCATTACGTTGATATTAGATTGGTGGGCTGTGACTTTATGACATCAAAGAAATTGATTACAACTTTTTTTATATGTGGCTCACAATGCAGCCATTGCCGTGATCCAAACCTTATATGCTAACCTCGGAA…	690	chr18	24264409	24265098	-	none	AQP4-AS1	1.17938	15.0484	2.35843e-05	2.68834	0	0	0	5.17067	1.76312	0	2.50127	0	2.84087	26.4633	11.3933	0	8.16385	14.846	20.0346	22.4821	17.9602	7.7173	10.0549	15.0393	22.24	46.1208	0	15.4172
119997	GACATCTAAAATTCAATGAAATATAGCATTTTTGTGACCTGGAAGAGTTTACCTAGCTGCTCTGAGCTTCAGATTTGTCTCCTAGAAAAAGAGAATAATAACCCCAACCTCTCAGAGAGATGGGGGCTGACAGAGCCAGCTCAGATAGAGTTCACAGAAGTCTATGTCCAACATTGTCTGTTCCCAGTCAATAGTAGTAGCTACTCTCCTCTTGTCATTTATCTATTTCAGCCTGGATACAATGCAAATACCACAAACATACTCGATTACTTATCACGGTGTACTTTACTTTGTTTGTTAGACTCACCAGCCATGCACCAAGTGGACAAAAAAGCACAAAGAGGGCCTTGATGACTAGTGTATTTTTTTGGTGATCATCAATGAAGCAGATAAAGTGAA…	1339	chr18	24258255	24259593	-	none	AQP4-AS1	1.32156	17.1864	2.42058e-05	2.70654	0	0	1.93165	3.44711	3.52623	0	1.66751	0	2.84087	17.3902	7.25029	0	5.83132	17.5452	37.456	23.9325	14.1791	12.1272	16.4534	11.6972	55.6	39.8316	0	12.8476
4009	CTCATTAATACTTCTATTCAACTCCAGGAAAATGTGCACATTCCGCAGCATTATAGGGGGTTTCAGGTTGGCTGATAATAACCAGGTGATTTTCCCACAAAAAAAACTGACCCAGGGATAAAATAAAACAATATAATTAGCCTTCCCATGCAGCAGGGCCTCTCATGGTAGTCACAGGTGGATTCCGCTGGAGCAATGATGGAAATGCTGTTGTTTAGTGACCAGGTAGGGGAAACTGTGGCAGCCTCACCACAGCTAGTGGTATCTATGCACACCCAGGTTGAGCCCAAGCACTGAGGCATCTCTCTTCTTCCTGATGGAAAGTGCAATGGGATTTTAAAATTTGATCTGAGTGTCTGACTGCTTCAGTGGAGGGCTCTGCAATTTCACATTTCATCT…	446	chr18	24240802	24241247	-	none	AQP4-AS1	0.869196	11.3418	2.91024e-05	2.67497	0	0	0	4.30889	2.64467	0	0	0	4.73478	12.8536	5.17878	0	11.6626	13.4963	7.83963	13.0541	15.1244	7.7173	6.39855	10.8617	33.36	19.9158	0	19.2715
38320	GAACCTGACTTTTCACATGCTATTTCACTGACAGCCTATTTTAAAATTTAAAATAAATTTTCATTACTCTTGATTTAAAGGTCATGAAGTTTACTGATTTCTTTCTATTGCATGGAACAAAATAAATTTTCAAAATATTTTATACAGCCTCAACTTTGAGATCCCTTTGAAATGCAAGAAAATAAAGATCCCCACCACAATAGAATGAAAATTTACCTTCAGTCTATTTGCCACTGGAATTACTACAAGTTCAAGATCAACCAAACAGGTTGAATCACTTTAAAATCTCAATGGCCTAATGTTTTAAAAGATC	313	chr18	24239902	24240214	-	none	AQP4-AS1	1.06816	13.8928	3.40389e-05	2.67322	0	0	0	3.44711	1.76312	0	3.33503	0	3.78783	21.1707	9.3218	0	6.99758	9.44743	19.1635	21.0316	7.56219	9.92224	9.14078	7.51966	46.5018	31.446	0	19.2715
76983	GGTATCCTTCTTCTATGCTGTTAAACACTAGAGACCATGTGACTTATTCAGCTACTATAAACCAAAATGATAATAGTTGCTATCATTTATTGAGAACTGACTGTGTGCTAGGCTCAGTTCTAGACACTTTCCATATATTATCCCATTTAACCTCAAAATAACCCTTCAAAATAGATATTTTCATTCATATTGTATGGCTAAAAAAACTAAGGATCAGGTAACACCACAAGTTAAGGTGGCAGAATTACTATTGTAACTCAACTAGAGTCATAAAACCTACTTGCAATTATTTATTTAAAATATAGAAGGTAAGTATCCAGCAAAGAATTTCAAATGCCAGTAATGAATACAGATGCTTCACAACTTTCTCCACACATCTACCTCCTTGTGGACAAACAG…	554	chr18	24241807	24242360	-	none	AQP4-AS1	1.38782	17.5986	5.26552e-05	2.64587	0	0	0	5.17067	1.76312	0	4.16878	0	4.73478	21.1707	5.17878	0	5.83132	17.5452	27.0032	14.5046	15.1244	23.1519	16.4534	15.8748	56.6109	42.9762	0	15.4172
77759	CAGAAAGCTAGCTATAACTTAGGTGGAAAACTGGACTCCATTAAAAAAACATTAAAAGCTGAGAGGGAGGCAAGTTGATGTGGCATGGCTCCCAGCACTAAGAAAGCAAGAGTGCATGGTGAAGCTTGGAAATAGAAAGTGATGTCCTCATAAAAACATGGCTCTAGGCTGCTGTGCCACTAGAAATTCTTCTGTCAGTTTAGAATATTTCGCTTTAAGG	220	chr18	24261671	24261890	-	none	AQP4-AS1	2.19923	22.3207	5.80751e-05	2.52808	0	0	2.89748	4.30889	7.05246	0	3.33503	0	9.46957	46.1218	13.4648	0	16.3277	17.5452	26.1321	27.5587	22.6866	15.4346	9.14078	19.2169	68.7418	40.8798	0	24.4105
25204	AAAATATTTACATTCTATCCCTGGAACTTGTGTTACCTTACATGGAAAAAATCGACTTTGCATGTGTGATTAAGTCAAGAATCTTGAGATGAGATTATCCTGGATTACCCAGGTGGACTCGGTGGACTCTGAAGGGGTCTTATAAAAGAAAGGCAGGAAGATCCGAGTGAATAGTTGGAGATGTGACAATAAAAGCAAGAAGCTGGAGTGATTTAGAAGCAAGAAGCTGTAGTGATTTGAGGAAGGGGCCATAAGCCAAGGAATGCAGATGGCCTATAGAAACTGTAAAAGGAAGCAAGGCAATGGATTCTTCTCTAGAGCCTCCAGAAGGAACATAGCCCTGCTGACAGTCTGATTTTTAGACTTCTGAC	371	chr18	24256433	24256803	-	none	AQP4-AS1	1.29308	14.0399	6.82169e-05	2.54149	0	0	0	6.03245	2.64467	0	1.66751	0	3.78783	19.6585	9.3218	0	9.33011	6.74817	29.6164	16.6802	10.398	17.6395	9.14078	16.7103	38.4146	23.0604	0	14.1324
115537	GGCCGATCCCCTGTCAATGGCTGGCTCCTGACACTGGGCAAGCTGCCTATTTCCCTCGTCTATAAAATGATGCCAAAGGACTAGATGCCTGCAAAGGATCTTTCCAGTTCTAAAATTCTAGGACAATGATGCATGGTTCTCTATGTGACACTTGATTGTTTTTGTTTGTTTGTTTTTAATTAAAAGTCACTTTAGGCCACACCTTTAATGTGTTCAGTCATCATATCAGTGATTGGGGATATTTCTTCCATAGTCTCTTTTCTTCTCACACTCTCCTGTATTAACATTTAGTGCCATTTAGGGGCAAGAACAAAGTTTTTATTCCATTGAATTTAGGGCTTGTGGACATTTAAAATTTTTTATTGTAGATCAGAGAATGTATCAACCTTGTGTGTGGGG…	552	chr18	24238839	24239390	-	none	AQP4-AS1	1.1903	13.2973	7.07087e-05	2.5526	0	0	0	3.44711	4.40779	0	1.66751	0	1.89391	25.7072	9.3218	0	6.99758	14.846	8.7107	7.25228	5.67164	11.0247	11.883	10.0262	51.5564	28.3014	1.57659	17.9867
59557	CAAATAATTATGAAGAAAGAGGTTCATGGCAGAATTCTAGTCAAGTACCACTTCTTACACGAGCAATTATACATAATGCTTAATTAATTGTTTTATATGTGTGAGGCAGTCTTGTCAAAATCAAGGATCCTCAATGGAACAAAAAGAAGGTGTGTTCACTAGTAAGCAGCATCACAAACATATGATTTTTCATAGCTAGGATTTACCTTGGAGAAAATCTCATTTCACCCCATTATTTTACATGTGACAAAGTGAGATGTCCATGTAATTTCTAGAT	277	chr18	24242444	24242720	-	none	AQP4-AS1	1.29308	14.5531	7.54856e-05	2.55749	0	0	0	6.03245	2.64467	0	1.66751	0	5.68174	13.6097	7.25029	0	11.6626	16.1956	17.4214	24.6578	13.2338	7.7173	7.31263	10.0262	51.5564	27.2532	0	19.2715
53881	GTCTCATACCAGTTATTTACGAAAAAAAAAGGAAGTTAGATGGATTTTTAATATACTCTTTTTCCGAATTTCTTAAAGATGGAGAAAAAGGTGCTACGGACACCCCAAAATGCAGATTATTAATTAGATAAAAAGTACAAAAGTACTTTCAGGTCATTTTATGATTGCAGAGGCTGACTGAAGTCTGTTAAGTTTGTATCTCGTACTTGGCAAGATATGAACCTGACTT	229	chr18	24240204	24240432	-	none	AQP4-AS1	0.969913	10.8978	0.000105987	2.52307	0	0	0	3.44711	2.64467	0	1.66751	0	6.6287	18.9024	5.17878	0	6.99758	14.846	12.195	13.7793	3.78109	11.0247	3.65631	5.84862	35.3818	22.0122	0	14.1324
99167	CCTATCTTGGCCTCCCAAAATGCTGGGATTATAGGTATGAGCCACCATGCCCAACCTAGACCAGCATTTCTAGTGTGTGATGAGGCTTACTTGCATCAGAATGTCCTTAGGTGATGGTTTTGAATACAGATTTTCACACTAAATTTACTAAGTGACCCTCTCTAGGGCTGAGGTCCTAGAAATCTACATGGGATTATTACCTTCATTCCAGAAAACACAGTAAAAGTACG	230	chr18	24249520	24249744	-	none	AQP4-AS1	0.747051	9.78745	0.000139334	2.56985	0	0	0	4.30889	0	0	1.66751	0	3.78783	21.1707	2.07151	0	4.66505	10.7971	10.4528	11.6036	6.61691	6.61483	10.0549	6.68414	29.3164	19.9158	0	12.8476
16053	CAACTGTAAGAATGAATGAATGGATGTAATGAACAACAATATTCTCAGAGTCCCAGAAGTCTAGGATAGGAGATGGTTTAGAGGAGGCTGCTTGGGGTCAGGAGGTCTGGAAACAATAGTAGGGACATCTGGTTGGCTTTTAGGGAATTAGGAGCAAGGTCATGTTCACAACTACATTACATATTGTACTGGACCCAAAATCTCCAG	207	chr18	24253979	24254185	-	none	AQP4-AS1	1.29699	10.881	0.000573017	2.26832	0	0	0	2.58533	5.28935	0	2.50127	0	2.84087	15.1219	7.25029	0	5.83132	12.1467	14.8082	10.8784	10.398	14.3321	6.39855	15.8748	32.3491	22.0122	0	3.85429
106423	TAGAAGACCCAAGGTTTAGCTTCTTCTCCCCCCAAAAGACATCTTTAAGTAGGCTTTACTATAGGAAGAAAACCTGCAGTAATGCTTGCCCTTGCCTTGGGGAAATAATGAATAATAGGAGTATAATAATGCTTTATCTGTGAAAATCTTCAGACACAAAGAAACAAGATAAAAGGCTGATGAGTTACTACCATTATCTGCAAGCTCTTTCACAGAGGCTTTGTTTTGTTTAGGGACATCTACAATTAGAAAAGAAAT	258	chr18	24244442	24244699	-	none	AQP4-AS1	1.54404	13.1721	0.00142734	2.2171	0	0	2.89748	4.30889	2.64467	0	2.50127	0	0	17.3902	5.17878	0	3.49879	22.9438	10.4528	16.6802	6.61691	14.3321	10.9689	8.35517	39.4255	35.6388	0	19.2715
11075	TTTTTTTTTTTTCCGTCTCTGTGTTTTTCAATGTTTTTCAGGCCTTCTGTCTTGAGCTCGTATTACTGCTGTTCACTGATGTATTGTAAAAGCGTAAAACCGGACGTGACCCAAATGTCTATCAAAGGAGACTGATGAGAGAAATAAACGGATTTGTTCACACAACGGCTTCTACAGCAAAGAAACAGAAGGTAGCTCCAAGTGCTCTGAAATGGAAAG	219	chr1	28573087	28573304	-	none	ATPIF1	10.7772	42.2075	5.19745e-05	1.78012	11.7455	6.03842	5.79496	6.89423	15.868	15.1248	14.1739	10.5778	62.4992	27.2194	37.2872	37.4671	27.9903	118.768	43.5535	15.2298	21.7413	13.2297	64.8996	73.5255	26.2836	13.6266	70.1583	21.841
88398	GTTCCTTTAAGGTGAAGCTACGGTGACACATTTAGTGGGGAGAGGCCATAGGCAGAGGTTTCCTTATATACGACCTCCTTAAACTCTTAGCTGTTGAGTAGCAGAGGTAGGAGTGTTTATGTAATCGAGTTATTCTTATTGGGCTGAGAAAACCTACACTTGTTTGAACTGCTTTCTGGGAACAGAGAAGGGGAGGGAAGCCCCTGTCGGCTGGAAACTAAAGGAACAGAGCAAAGGCATTATTTGAGTGTCTTGGGA	258	chr11	111176058	111176315	-	none	COLCA2	32.3791	128.723	3.61841e-05	1.80756	30.8318	41.0613	30.9065	31.024	44.9595	34.787	23.3452	22.1173	162.877	55.1949	186.436	275.149	83.971	345.506	88.8492	29.7343	133.284	136.706	150.823	148.722	54.5891	49.2654	19.7074	138.755
8053	GGCCTAGGGAAAATGGGTCTGACTGGATGGAGCTGAGTGAGAATGGTGGGAGGCCCTGCAGCCGCCGTGGAGAGAACATGCGCGGGGGAAAGCCCCGGTCCTCCGGCTGGCGAAATGGACCTCTGGAAGGAATGGCCACACGGTGTGAAATCACTGGTGTTTATTGGCTGTGATTCCATCCGGAGAGAACACACGCAGGGGCCCCGACATGCAGGAGGAGGCGCAGGCGCAGGACAGACGGACAGAGGACACCACGGTCTAAGCTAAGCTCGCGGCCCGGGGCGCCATGCGCTGGGAACGGGGTGCGCAGGTTCTACGAGAGGACGCCCTGTCTGCTCAGAGCTGGCTTTGTAAGGTGTGAAAACAGG	368	chr4	778600	778967	+	none	CPLX1	1.13899	10.9842	2.33955e-05	2.50851	0	0	0	0	1.76312	1.51248	5.8363	0	11.3635	15.878	12.4291	8.19593	5.83132	12.1467	13.0661	29.7343	2.83582	20.947	11.883	4.17759	9.09818	0	7.88295	10.2781
40118	GGAGTGGGCACCAGCACTCTACAGGACGGAGGAGCACACCGCGGGATCACCAGCCACAGGGAGGGGCCTTTCTGCCCAGGAGGAGCCCCTCCCCTGCCATCTCCTGCTCCTGTCTCAGCAGCCCCTCCCCATAGAAGCAGTTGGTTCTGCTCCTGGTGCTGGGCACCCCCTGGATCTCCAAGGAGGCCCCTCCTTCCTCCCAA	203	chr4	781834	782036	+	none	CPLX1	1.61478	10.651	4.01526e-05	2.25741	0	3.62305	0	0	0	3.7812	1.66751	3.84649	14.2044	7.56095	9.3218	4.68339	8.16385	16.1956	12.195	26.8334	3.78109	17.6395	16.4534	1.67103	9.09818	5.241	7.09465	10.2781
77079	GAGAGCCTCCCTCCAGCCAGGGGTGTGGGGGTCTGTGCATGTGGCGGCAACATGTGTATCCAGCCCAGGAGGCTGTGCTGCCCACAGCAAAAGCACTCAGGAACATGTGTGTGCTCAGAGGAGCATGCCTGTAACGGCGGAACATGAGTTGTGTGAGCAAAGGAACCTCCCAGGTCAGGGGAGTGACCCTTGGGGCTTGTGGGACCCTGTCTGCAAACGGTGTGGGATCCTTCCTTCTGGGCCCAGGAAGGAGACCCCAGGCCCTGCCACCAGGTTGTGGGACACTCGGAGCTTGGCCTGAAGTGCCAGTTGCTGCAGTGAGGCTCCAGGTCATTCTGAGGCTGAGGTCACGCCGGACTTGGCCTGAGGGCCAGGGTCACTCTGCCGGGAAAACAGGCT…	482	chr4	782546	783027	+	none	CPLX1	4.03791	17.4117	0.00016686	1.84397	0	3.62305	5.79496	0	4.40779	3.02496	5.8363	9.61621	19.8861	6.04876	22.7866	16.3919	9.33011	28.3423	13.9371	41.338	9.45273	38.5865	21.9379	10.0262	12.1309	6.28919	11.8244	10.2781
19493	CACTCTTGACAGAGCCGGGACTCCAGGGGTCTCCTCAGTGAAACGAAGAGCACAGGGTAGGAACGTTCTCCGCACAACAGGGGCGACACCCAGAGGGCCCTGCAGGCCCAGAACAAAGCCCTGACCCTGTGGGGCAGCAAGAGCAGATTGGTTCTCGTCCTAGCCATCCACAGCGGGAAGGGCAGCAGCTCCAGGCACGGAAGTGGAGGGAGCATG	216	chr4	782262	782477	+	none	CPLX1	1.87237	10.0845	0.000979487	2.00642	2.93637	4.83074	0	0	1.76312	3.7812	1.66751	0	10.4165	9.82923	9.3218	2.3417	2.33253	21.5941	12.195	25.383	7.56219	27.5618	10.0549	7.51966	2.02182	3.1446	2.36488	7.70859
25348	CGGATGTTCCTGCCTATGGCAGCTACTTCTCAGGGCTGGGGAGGGGAGCCCTGGTGTCTCCAGGTGACTTGAACATGAGGTCTTCGCCTCACCCAAAGCCCCCTCCTCCCACAGGCCCCGTGCCCATGGCACTCCTGTGTCCACTGAGCCCTGAAGGCCACCCCAGCCCAGGCTCCTTCCAAGAGGCCCTGGTTCTCATGGGCCTTTCAGGTGAGGTTGGCCTTACCAATTCTACCCAGATCCTCCAGGTCAGTCAGTGGAGACGCCGCCCCTCCCACCAGGGGCTGTGCTGGGATCCAGGGGAAGCCTGGGGCCCTCCTGGAGGCTGTTCTGGGCCAGCGGGCCTGCTCACCTATAGGCAGCCCCATTGAGCTCAGGGTGCACGACGGCGGGGTCCAT…	1248	chr4	1206349	1207596	+	none	CTBP1	0	15.5315	6.66089e-11	4.32535	0	0	0	0	0	0	0	0	9.46957	3.02438	15.5363	25.7587	0	14.846	36.585	13.7793	7.56219	22.0494	8.2267	13.3683	35.3818	22.0122	15.7659	5.13906
69477	GTGTGGGAGCCCAAGGGATTTAATCTCCAAGTCCCTCGTGGGAGGAGCCCTGATGGGGGGACATGCTGCCTGGCCCCTTCCAGCCAAAGGGTCTGTAGCCCCAGGAGCTGCAGGCTGATACTGCCCCTGTGGGGGTGTCTCCTCTTGCGGCTGAACATCCAACCCAGGGCTGCCTGGGGTCCCAAGGTGCTGTAGGGGCTGCAGGTCTGGACGGGATGCCATGACTCCATGGCCAGGGCCCATGGGGACCACTCACAGACACTGGGGCCTCACTCTCTCCTGGTTGGTCAGGAGCCCTGCCCAAAGAAGGGCTGAGGAGGTTGAGCAGCCCCTCACAGGACCGAGGCAAGGCAGGCCTAGAGCCCGTGGCTCCATCCTCACCCCGCAGCGGGCGGCAAA…	655	chr4	1207598	1208252	+	none	CTBP1	0.771363	19.4329	3.96976e-10	3.57922	0	0	0	0	6.17091	0	0	0	17.9922	7.56095	18.6436	29.2712	2.33253	24.2934	35.7139	20.3064	14.1791	22.0494	5.48447	23.3945	28.3055	32.4942	17.3425	11.5629
78638	AAAAAAAAAAAAGGCAACACATTTTCGGACAAAGAAAAGCAAAAGGAATCGGTCACTGGTGAGCCACATTTCTAAGACAGTCTTTAGGCTACAGGAACGTGACGCCCGAGGACAGCCAGAATCGGGGGGCGTAAACAAGGCAGAAAGGGTGGATGTGTCGGTTGATATTCAAAAGAAAAATTACTGAAAAATTCCTTGACAGACTCATGACTAATAGCTTCTTGTACGGTTTTCTGCATAATAGACGTG	249	chr4	1212194	1212442	+	none	CTBP1	0	10.5001	8.41798e-10	4.06777	0	0	0	0	0	0	0	0	16.0983	0	7.25029	11.7085	5.83132	9.44743	13.0661	14.5046	13.2338	11.0247	8.2267	10.8617	16.1745	19.9158	5.51806	5.13906
119378	CATTTATAACAGCATTACAAATGCCAAATGCCTAACAATAAACTTAATGAACTACGTGGAAACCTTCTACTGATAACGACGAAACACCGTTAAGAAAAGTTAAAATAAATGGAGAGATCATATTTATGTCCCGAAGGTTCAATATTATTAGGAAGTCAGCATTCCCAAAACTGATTTTAAGGACTCAACAAAATGAAAATTGATGAGCTGATTCCAGAATGGAAATGGAAATGCACAGCAGGACCTAAAACAGCCAAGACCCTCGTCAAGAACATGGTGGAGGATCTCAAGGCTCACAGCCGTGCAGACAGCGTCACATGGGAGGAAAGGGAAGAAAAACAGGTCCACGGAACAGAAGAGTCCAGACGGACCCACTCACA	380	chr4	1214107	1214486	+	none	CTBP1	0.18906	10.8489	2.64526e-09	3.73201	0	0	0	0	0	1.51248	0	0	8.52261	5.29266	16.5721	11.7085	2.33253	6.74817	8.7107	15.2298	7.56219	7.7173	5.48447	14.2038	28.3055	17.8194	7.09465	10.2781
44640	GAGGGTGAGAGGAGCCACCGCGGGCCTCTGGCCGCCCTGGACGAGTCTTCACAGGTTATGCTGGGTGGCAGTGAGTTATGAAGGCGTATCCTAATCTCTAAAGTAAAACTAAACACGATCACTAAGCAGAGTATAGGTTAAAAAGCAACAACAGATGCAAGGAATCATTTAACACCTGATTAATATAAAAGAAGGCCAGAAAGGAAAAACAAGGATGAACAGAAAACACGTAGCCAGATGACACCGAAATCCAAATCATCAGCAATTACACTAAAAATAAATGAACTGAACACTCAAGAGGCAAAGACTGTCAGACTGAAAAAAGAAAGAGGAACTAACTCTATACTATTAATAACAGACACACTTTAAACATAAAAGACAGAAGTCAGGCGCCGTGGC…	401	chr4	1212455	1212855	+	none	CTBP1	0.440779	13.0203	2.96033e-09	3.55365	0	0	0	0	3.52623	0	0	0	12.3104	5.29266	13.4648	14.0502	3.49879	16.1956	14.8082	21.7568	9.45273	5.51236	5.48447	14.2038	28.3055	25.1568	14.9776	3.85429
40979	AAGGGTACACTAGCCCCTCGGCCCACACCAGCTGCCAGCCACACCACTCCCCTGCAGCCTGTCCACAGGACGTGACATGAACCACTCAGTGTCAAACGGACTGGTCAGTGGGTCTCCACCCACCCAACACATGTCCTCCGTGCCCAGGCCCCTCCGCTGGCCTTTCGATCCACCCATCAATGTTTCCGGCATCTCAATTCCAGCCACCACTACGTGGAGACGGCAAAGGGGGCAGGAGGGAAACTTCCAGACCAGGGAGGCCCCGCTGGGCTCAGGTCCTGACCCCTTCGAGTGGAGCGGCAGAGAAAGCCATCCCAGGCAGACGTGCCTGCCCCCACC	339	chr4	1210215	1210553	+	none	CTBP1	0.550974	14.3409	4.73767e-09	3.48138	0	0	0	0	4.40779	0	0	0	12.3104	2.26828	8.28605	15.221	2.33253	13.4963	25.261	20.3064	16.0696	24.2544	5.48447	15.8748	20.2182	27.2532	11.8244	8.99335
46416	GTGTGTGCTGCGATGTCCATGTGTGATGTCTGTGTGGGGTCCACGTGTGTGCTGTGATGTCCGTGTGATGTCTATGCAGGCCTGTGTGAGACCCATGTGTGCTGTGTGAGGCTGTGTGTACTGTGACATCTGTGTGTTATCTGTGCGTGCCCATGAGGCCTGTGTGTGCTGTGATGTCCGTGTGTGATGTCTGTGAGGCCCACGTGTGCTGTGGCGTGTGACATCCGTGCA	231	chr4	1218098	1218328	+	none	CTBP1	0	10.2967	4.92097e-09	3.94575	0	0	0	0	0	0	0	0	3.78783	3.02438	8.28605	14.0502	2.33253	13.4963	20.9057	23.9325	6.61691	3.30741	4.57039	10.8617	19.2073	19.9158	7.88295	2.56953
99810	GATGTCTGGCTTAGGATAAGAAATTATGATGATGCAGGTGAAGAGACAGGAGGATGTAGTTTCTAATTAGAACAAAACACTGGAAGCGGACAGACGCACAGATGACCGAGGCTGGAATCAGCCAGCAAAACCTCTTAATAACTACTATAAACATGCTCAGAGATGACAACAAGTGTGGATGTAAACAGCAGAAAAATGGAGGCTTCCGGAAGATGAATGGTAACTCTATAAAGAACCACATAGAAATTCCAGAACGAAAACATCCCTCTGAAACGGAACTCCCTGGACAAAGCTAACTGCAAGAAAAGGATCGGGAGCTTGAAGGGAGGGGCTCAAAGTCAGCAGATGGCATCCAAACAGAAGCAGAGAGAAAAGAATTTAAAAAATAAATT	392	chr4	1211514	1211905	+	none	CTBP1	0.312659	12.3119	6.50001e-09	3.60624	0	0	0	0	0	0	2.50127	0	17.0452	3.02438	7.25029	15.221	0	8.0978	26.1321	15.955	13.2338	14.3321	6.39855	10.8617	27.2946	11.5302	14.1893	6.42382
77451	CCCAGCCACGGTGCTTGGCTGACAGCTGGGCAGGTCACGGTGGCTTTTCTTTGGTGCACTGCTGCCCATTAAAGCCTCACACCCAAGGTCCTCAGGGACGGCAGGGCTCTGACCAGCATCCACGTGCCACACCCTGTCCCCTAGAAGGCTCCAAACCCACTGACTCTGTGAACAAAGGAAGGGGCAGCGGGAACCTGGCCTCATCCTCCTTGTGGCTACAGGCTGCTGGGGCAGCTAGAGTGGGCGGGTGGCCTCTGACACGTGTGTACACACATGCACATACATACAAGCTCATACAAACATGCAGACACATGCACCCACGCACACTTGCCCACATACATACACATCACTGTGCACACACGATGACTCCCTGAAGGGCCTGGAGCCAGCGGGAGGCAG…	495	chr4	1208838	1209332	+	none	CTBP1	0.440779	15.2955	1.35811e-08	3.55141	0	0	0	0	3.52623	0	0	0	4.73478	5.29266	17.6079	16.3919	0	10.7971	37.456	18.1307	12.2886	9.92224	6.39855	24.23	33.36	31.446	10.2478	6.42382
5444	TGAATGAATATAAGAACAGAGATAAGCTAAAATTAAAAGGATGAAAAAAGACATACCACACAAACACTGATCAAAAGAGCTGGGATGGCTGCCTCAACATCAGACCAATTAATTAGACCACAAAAAGACCAACAGGAAACGTCCTACTTAATGGTGAAATGTCAGAAACTTTTTCTCCCACATCAACACGGTAACACCCACACTCACTGCTGCTGATGATTGTAGCTAATGCAAAAAGGCAAAAATAAAGAAATTAAAGAAATAAAAGGTACAGAGATCAGAAAGGAAAATGTAAATCTGTGTTTATCTGCAGATGACA	319	chr4	1213144	1213462	+	none	CTBP1	0.906637	15.0881	1.68424e-08	3.18702	0	0	0	1.72356	2.64467	0	0	2.88486	8.52261	3.78047	18.6436	15.221	0	20.2445	18.2925	19.5812	10.398	19.8445	11.883	18.3814	30.3273	27.2532	12.6127	6.42382
39720	ACAAAAGGTATTCACCTAAAAAACGGGTGATACGCTGGGCTTCATAAAAACTGAAAACGTGTTCTCGTCACAGAGAGAGGTCAAGAAAGTGAAAAGTCAAGCCACGGCCTGAGATATTCGTAAACAAGAAAAAACAAAAATTTTGAAATTATGAAAATATCCACAATGCATGTCGATCTGACAAGAACCTGACGCAGACCACGTGAGGGCTTCGTAACCAACACGAAAAAGACGGCCGGAGGTGCTCCGAGTGGCCAAGGGCACAAAGAGGTGCTCAGCCTCCTCACTTATCAGGAAACTATAGGTTAAAATTAAAATATC	321	chr4	1214718	1215038	+	none	CTBP1	0.51036	12.0005	2.33688e-08	3.39534	0	2.41537	0	0	0	0	1.66751	0	17.0452	2.26828	13.4648	16.3919	2.33253	8.0978	18.2925	15.955	10.398	5.51236	1.82816	11.6972	24.2618	23.0604	14.9776	6.42382
28801	GGGTCCCAGTACCCAAGCAAGGGGCACCAGCCAGACATGCATGCAGACCTGTGTGAAGCCACAGCTGGATTTCCTGCTGCCCAAAAGAGAGGAAGTGCCCTGAGATGAGGCTCTGTGAGGAACTGAATGGCTGCAACCTCATGCCGGCCCCAGACGGGACCACGAACCACCGCCAGCCACACCAGGCAATGTGCAACGGGGTCCTCAGTGTGGCAGTGAAGCCTCCATGGACGAAGCAAGACGGGACGGAGCTTGCATGAATGGGCACAGGAGAGAACTCGGAGCCGGCCTACCTAAATCCCCGGCCGACTTGATGTCGATGTTGTCAAAACCACTGCCAATCCGGACGATGATGCGGAGGGCTTTGAACTTCTCCAGGTCCTCCCTGGTGAGAGTGAT…	460	chr4	1221694	1222153	+	none	CTBP1	0.440779	15.0417	4.76914e-08	3.48337	0	0	0	0	3.52623	0	0	0	6.6287	2.26828	15.5363	15.221	0	16.1956	25.261	34.8109	9.45273	23.1519	3.65631	25.901	28.3055	20.964	9.45954	3.85429
51636	CTTGTCTCATCTAGAAGACATAAGGACAGGCCAGGCCCAGTCAGGGATCCGCACAGGGCGGGCAGCCAGGGAAGCAAGGTGGTCACGCACGCCGTTGGGAAGGCCCAGCTCCCTAGCCCCTTCCCAGCCCCACCCTGGGCTCACCACGGCGCTAGGACTGAAGGCCTCGGGCGTGCTGCACCGCGGCCCTGACAGGCTGGCTGAGGATCTGCCCTGTATGGACCTGCACGGCCCCACAGCTCCTAGAGAGCTCCACCCTCCTGCCCAAGCCCTGAGCTGAGGACTGGGCGGGGGCTCCTGGCTTGGTCCCCCTGTGGTACCCCTTTTCTGGGTCC	335	chr4	1208252	1208586	+	none	CTBP1	0.771363	15.7202	7.86871e-08	3.23121	0	0	0	0	6.17091	0	0	0	6.6287	3.78047	16.5721	18.7336	0	20.2445	30.4875	15.2298	12.2886	16.5371	9.14078	26.7366	26.2836	27.2532	12.6127	8.99335
47005	CTGTGTGAGGCTGTGTGCTGTGACATCTGTGTTATCTGTGTGTGCCCGTGAGGTCCACGTCTGTGCTGTGATGTCCATGTGTGATTTCTGTGTGCGCCCGTGAGGTCATGTATACTGTGATGTCTGTGAGGCCCACATGTGTGCTGTGGCATCTATGACATCCGTGCAGGCCAGTATGTGTACTGTGACATCGGTGTGTGATGTCTGTGTGTGCCATGATGTCTGTGTGAGGCCCACATGTGTGCTCTGATTTCTGTGTGAGGCTGTGTACTGTGACATCCGTGTGTTATCTGTGTG	297	chr4	1218504	1218800	+	none	CTBP1	0.220389	9.97147	1.12175e-06	3.29682	0	0	0	0	1.76312	0	0	0	2.84087	2.26828	13.4648	2.3417	0	6.74817	21.7768	10.1532	10.398	14.3321	3.65631	15.0393	22.24	29.3496	2.36488	2.56953
63763	GCCAGGGCAGGCCTCCCTGAGAAGACCAAGCTTGCTGGAGACATAAGGGGACAGGAAGGGAGCCAGAGAGCTGGAACAACACGTGCGAGGGGCCCGCGGCGGCCTGAGGGCCAAGGAGACCAGACCGCCAGGCACACAGGGTGGCCGGACGTGGCCCAAACGCCCAGGGGACCCCCAGTCACTCTGGGAAGAGGACTGGGGGAGGCTGGGAGGCCAGTCAGAAGAGCTGAGGACCGTCTAAACGCACTACATCCTAGAAAGGGAGGCGCCTGTTCTACGAGAAGGAACATGGTGGCTCCTTCCATCCCCAG	311	chr4	1210820	1211130	+	none	CTBP1	0.656224	10.2053	1.40204e-06	2.93513	0	0	0	1.72356	3.52623	0	0	0	7.57566	2.26828	4.14302	15.221	0	5.39853	14.8082	18.1307	7.56219	8.81977	11.883	19.2169	18.1964	14.6748	10.2478	5.13906
36770	GGCAAGGAAAGAAGTTTTACAAACAAAACTGGTCAACTGTTCTATCTTCTTACTCCTGGAAAACAATAAAGGTCCACTTTCAAACCATTTGGACGCACTTGCTCCTTCTAAAGGGTTAGGGAGTCCCGGCAGATAGCGTACCCCTCCCCGCCCAGCAGCAGAGAGCAAAGTCCTTCCTGCCGATCCTGCAGACCCCGGAGTCCAAATGGGACCCCGTCCACACGACCGCGGAGTCGCCTCCGAAGAC	247	chr5	32174771	32175017	-	none	CTD-2186M15.3	1.60872	11.0493	5.70577e-05	2.298	0	4.83074	0	1.72356	1.76312	0	1.66751	2.88486	29.3557	6.80485	8.28605	16.3919	11.6626	20.2445	25.261	7.97751	11.3433	11.0247	3.65631	1.67103	11.12	4.1928	3.94147	3.85429
78508	GAAGACGGCGGTGTCTGGGGCGTGGAGGGCACGGCTGGAGGCTGAGTGGGGTCCACCTTCGCGTGGCCCAGGCTCTTCCATTCACGGGGGGCCCCGCCAGGTTCAGGCTCCAGCCCTGGGTAGTGAAGGGGAAACGGGGAACGGAAGGAGGGAGGGCACGTCACGGGAGCAGGACTGCAGGACCGCGGGTCAGGGGGCGCAGGAAC	206	chr5	32174571	32174776	-	none	CTD-2186M15.3	4.63277	15.2506	0.00151544	1.53756	4.40455	3.62305	0	3.44711	8.81558	5.29368	6.67005	4.80811	15.1513	10.5853	5.17878	7.02509	6.99758	14.846	47.0378	18.1307	20.796	17.6395	10.9689	7.51966	11.12	18.8676	24.4371	7.70859
111348	GCAGAATGAGGACAGCGGACGGATGAGGACCTGGACTTTACCAGCGCACAGACAGAGCAAAAGGAGACAGGAGACTGACAGGACAGAAAAGAGCTTTTGCTTTTTCTACATTTTGTTTTTGTTTTGTTTTTTCCTGATAGTCCCACAAAGCTGAAGGTCGGCGGGTCGGGTGGAGCGGGTTTATCTTGCTGCTTGGGCTGTCTCAGGTGGCAGTGGCTTCCCTCCGAGGCCACTCTCTGCTGCCACTGCTCGGCCCAGGCCAGGGTTCAGGCTAGAGCGCGGATGCCGGGAAGTTGCTGGGCCGGACCTCGCGGGGCTCCGAGGAGATGGAGGGCGTCCCGCCTCCACTGTTCCTTCTTCCCTCTGGGTCCTTCTTTTCCGGACGGGATGGATGGACCT…	2369	chr2	172951069	172953437	-	none	DLX1	0	28.0154	1.71021e-10	4.34031	0	0	0	0	0	0	0	0	55.8705	12.8536	13.4648	25.7587	20.9927	2.69927	35.7139	0	15.1244	85.9928	14.6253	49.2955	44.48	36.687	0	34.6886
82368	CAGATTCAAGGGTGGAGAGGGGAGATTTCTCCACTAATGGCTGAAAATCTGCCCACTGAAGCTGGCATATCAAGTCACGTCATGTCTATGGCTTCCTTGACAGATTTCAAGAGGCATCTCCAAGGATCGAGTTTGGCTCAAGCACAGTTCTAGGTGCTGGAGATGCAACCTTGAAGAAGCCTGATAAAAACTTCTTGCCCTCAGGAGCTCATGTACTAATGGGAGGGAGAGAGAAGCAGCATGATAATTAAGTGAATTATATAATGTGTT	270	chr5	172264410	172264679	-	none	ERGIC1	0.542326	15.9821	9.11926e-07	3.26364	0	2.41537	0	0	0	0	0	1.92324	98.4835	11.3414	16.5721	22.2461	12.8289	21.5941	13.9371	5.0766	24.5771	2.20494	2.74223	4.17759	11.12	2.0964	1.57659	5.13906
28650	TTTTATTAACCTGGAAAATGTGTTCCTTTGTTCTGATTGTGTGGTCACCAACAACGGCTGATTTTTAATATGGGCTCTCATACACCCTGTTACCGATTATCAGACACCAGATCCTGGTCACAAGAAACAACAGCTCCCATTTGTAAATGAATGCCTTGACATTGAGCTTTACCCACAATGGAGAGTTGGTTAACAGGAGGTGGTCTCTCTGTGCCTGAACAATATGTGTGTTCTGACAAAATCAAATCACCAGCCCTGCAATCCCACAGACCTCACAGGCTCAGTTTGACCCACCAGGGAATGCTGCCTCCATAAGCTACTGGCCGCCTTCCATGGCATTTCTATCTGTGACAACTGCCACAAGCTACCTCCGCTGGATGTCAAACAGGCACTAAGCTT…	427	chr9	97331864	97332290	+	none	FBP2	0	14.9256	6.79938e-12	4.45717	0	0	0	0	0	0	0	0	23.6739	6.04876	9.3218	19.9044	5.83132	8.0978	6.96856	7.97751	7.56219	11.0247	31.0787	15.0393	19.2073	29.3496	9.45954	28.2648
16614	ACATTTAAATGCATTAATAGATGTAAATTTCATAGGACAGGTACTTTACATTCCTACCACTTACGAAGAATTATCTAACTCTTAGCTGTTATTCTACAACAACTTTAGAAAGGGTGTTTTATTGTCTGAGGGTAATATTTGCAAGCCATAGAATTTCTCAGGGTTTGCCAGCTTCTTTGAACATAAAGGGAAATTGGGGCATTAGCAAACTGACACAGCAATGGGTCTTGGTCTAATGGGCATACAGGTGAAAAGATTCTATTTGAAAAGTTTCTGGGTTTCCATACTGTAAACTCTGTTTTGTAAGTTAACTCCATGTCATTTTGAAATTTTGCAAACCCCTCTCTCCACACATGTGCACTAACACGTGAACTCCACAAGGGCTGTCATGTGTGTTTG…	464	chr9	97332737	97333200	+	none	FBP2	0.330584	16.5102	2.3118e-10	3.89878	0	0	0	0	2.64467	0	0	0	13.2574	8.31704	16.5721	26.9295	12.8289	14.846	2.61321	5.0766	3.78109	9.92224	37.4772	19.2169	22.24	35.6388	11.0361	24.4105
1383	AGAGGTGACACTGTCCCTGTCAGAAACAAGTCAGTGCCAAGGAGACTCAATAACAAAAACAACTAAACAATCCTTTCCTGCCTAACATGAGTGACAACTGCTTCTATATCAGTGACTTCAATCTCTCTGCCTCCTAGATAAAAATGATTAAGGTAACTAGTCATTAATTGCACCCACTTCCAGACAATATCCAATCCAGACTGACCCTCTCTTCCTCAAATCCTCTTTAGAATCACCAAGCAAAACCCCAAGTCCTATAAGCCCA	265	chr9	97330954	97331218	+	none	FBP2	0.37812	12.9517	4.65427e-08	3.43166	0	0	0	0	0	3.02496	0	0	16.0983	7.56095	10.3576	19.9044	0	10.7971	3.48428	3.62614	3.78109	9.92224	31.0787	20.0524	14.1527	20.964	11.0361	24.4105
54322	CAAAGCTATTTATTTTCTCACAGTTTTTGTGGGTCAGGAGTATTGTTTGGGCACTCAGCAAGGGCCTCACAAGACTGCAATCAGTGTTAGCTGGGCTGTGTTCCTCTCCAGTGCTAAGCGTCCCCTTTCAAACTTAGGTGTTGTTAGAAGAATTCAGGTCCTTTTGGCAGTAAGACTATAGCCCCTGTTTTCTTGCTGTCTGCCCACTGCGGGTGGCTCTCTGCTCCAAGAGGCTCCCATAACCTCTCCCACAACATGGCAGTTTACTTCTTAAAGGTCAGCAGGAGGATTTTTCTCTTTAACAAGGCCCTAGTCTCTCTTCTGAGGGCTTTCACCTGATTAGGTCAGGTCCTCCTTGGATAATCTCCCTTTCAATTAAATCAAAATCAACTGATTTGA…	578	chr5	15847599	15848176	-	none	FBXL7	0	16.0796	1.77088e-09	4.09503	0	0	0	0	0	0	0	0	3.78783	6.04876	19.6794	0	9.33011	4.0489	27.8743	13.7793	4.72637	13.2297	24.6801	16.7103	46.5018	4.1928	57.5455	5.13906
122967	AACCTATACAACATACAGCAAGACACGGCAATCATATCCAGATTAAAACTCTTCAAGAATGAAAAACCAAGTATTAACACTCATGAATGAGTATTTAGTGCACTGTGCTATGTATGAATCAAAAATCTTTTTGAAGTGAGAGAAATTATCCAGGTCTTCGTCCTACTCAGAAGGGCAATACTTTGTGAAAAATTTAGCAGTAAGATCTAACTTTAGCTTCATCCCATTTTTGTTTGTTCTAATGTCTTGTGGGTCACTTAGAATCTTGTAG	271	chr5	15901690	15901960	-	none	FBXL7	0	15.3443	4.55545e-09	4.00669	0	0	0	0	0	0	0	0	8.52261	8.31704	25.8939	0	5.83132	8.0978	23.5189	14.5046	0	6.61483	29.2505	13.3683	52.5673	10.482	34.685	3.85429
115879	TCAATCTGCAAAATCCTTTTTGCCATTTAATAGAACTCATTCACAGATTCCAGAGATTGGCATACAGACACTTTGGGGGCCATTATTGTACTTCCCAGAGGGGCATTTTGGGAAAACAATATCAGAATTACTGAAGATACAAGGATGTTCTGTTGGAGTTGAAACACAAGTAAACCAGTCACTGCTGTGACAGGTCTATGTGATAGATGTTATTTATGGGACTGAC	226	chr5	15867519	15867744	-	none	FBXL7	0	17.2151	7.51744e-09	3.98053	0	0	0	0	0	0	0	0	4.73478	15.878	9.3218	0	3.49879	5.39853	38.3271	10.1532	8.50746	6.61483	27.4223	23.3945	58.6327	11.5302	52.0275	0
80608	CACACTGCATTCACTGCACAGTTGGCTTTAATTAAATTTGGCTTTAAGTTTGCAAATATTAAAATCACAGTCCAAAGGATAAAAGGAGTAGGTGAAGCCTATTAAGGTTTTTAATGCATGGAGGAATCACCTGCACAGACCATGTATCAGTGGAGTTCATGAAACTGCACATTACTAGAGCAATCATTTATACATTAAGCGCTAAGAACACCCAAAGAAACATTCCATCTCAGCAGCTGCCATCTTGGATTTACTTTTCCAAAAGAGACAATAATCCAGACTATAGCATTTGAAAACATTCACTCGGGCTTTGTTTCCTTTT	322	chr5	15849006	15849327	-	none	FBXL7	0	15.7321	8.04848e-09	3.97135	0	0	0	0	0	0	0	0	2.84087	3.02438	16.5721	0	5.83132	2.69927	40.9403	11.6036	8.50746	16.5371	23.766	11.6972	58.6327	6.28919	40.203	2.56953
107005	GATTAAAGAGGAAGCCAGTTGCTGTTTGTGGTAGGTGCTCCCTGACGTGGGTGCCAGTGGAATCTCATCTTCTGGAATTTATATACTTGTGTAATCACATCCCCTGGAGTGTGTGGATTGGATGCAGTGGTGTGTCTCTAATAAATGAAATTTGGAAAAAGTGGTAAGATGTCACTTCCAAGGTTAGATTATGAAAGATGACTACTTCCTTCTTGGTTTCATCCTCTCTCTCGCCCTCTCACTTGCTCACTCTGATGAAGCAAGATGCCGTGCTGGAACCTGCCCTGTGGAGAGGCATACATGGTGAAAAACCAGGGAAGGCCTCTGAGCAACAGCTCTTGAGAAACTAAAGCCCTAAACCCATCAACTTGCAAAGAACTGCATCCTGCCACCAACTGC…	873	chr5	15884783	15885655	-	none	FBXL7	0.312659	24.7393	1.00015e-08	3.80995	0	0	0	0	0	0	2.50127	0	13.2574	6.80485	16.5721	0	13.9952	12.1467	33.9717	19.5812	6.61691	37.484	81.353	16.7103	80.8727	11.5302	44.9328	0
24416	CTTTGGACCTTAGCTTCTCTAAGTATATAATTAGACATCTGGTCTAGACAATTAGTTTCTAAATCTCCTGTCAACTCTAATACTCTATGATTATTTCGGCCCATAGTCTAGTAATTTTCCAAGACAAGTCCAATAATAAGAACCATATCACCCCTAAGTATCTAATTGGTTAAAGAAGCCTTGGATTTGTTGACAACTACGAAAATGAGGAACTAAAAAGCCAGGTTAAGGGAAATTAATACACTGATGAGGATGAATGTGAGAAGACAACAAAGACTGGAATAAGTGCTTTTCAAGGACTGGCTCCAAGGGACCTGAATTTGCATAAGCTTATCCGAAACTAAAATAAGCCCAACTTCCTAAAGAATTAAATATTATCTGTGCAACTAGGACTTTTCA…	514	chr5	15860479	15860992	-	none	FBXL7	0.208439	19.6814	1.38221e-08	3.79994	0	0	0	0	0	0	1.66751	0	13.2574	12.0975	29.0012	2.3417	4.66505	4.0489	51.3932	10.1532	5.67164	4.40989	37.4772	18.3814	76.8291	7.33739	37.8382	0
31971	CTGAAAATATTTTCATTTTTGACATGTAGGGGAATTCAATTTGGGATTTAAATGTTAACCCAAAAGGGATCATCCATTCTCCTGCTTGCCCTTCCACATATGTTCCTCCCTCGTTCTCCCTCTCAGTGACAGTGCTGACTGCCATGACTTCCCCTCAAGAAATTCCCAGAGCCTGCTCTTTTGTGCTGTCATAAACATAAGGAGTGAAACATTGGCTGGAAATGTAAACTTGGATCGAGTTTCCAAAAC	249	chr5	15887315	15887563	-	none	FBXL7	0	15.0701	1.54503e-08	3.90827	0	0	0	0	0	0	0	0	3.78783	7.56095	21.7509	0	3.49879	6.74817	17.4214	21.7568	2.83582	14.3321	27.4223	15.8748	49.5346	5.241	43.3562	0
82597	ATTTATTTCTTCGTGTAAAAAATAAATTGATTATATTCTTGTGAGCTTAGACAACAGAAGGCTGTCCCAAGTAGGACCATTCCCTATATGCTGGAAGAAAAAAAAAAAATTGAGCTGACCAAGCTGAGAACCTGAGTTGGATCATAGTGTGGTTACCAGGTAGACTTCCCCAACAGATATTCCAAAGGCCAGTTAATCTTGATACTAATTCTCAGTACCAGGGACAAATTTCTGCATCAAAGACCCTGAGGAAATACTTGGCGACATTTTCTTAGGTGTGTATCTTTAAAAAGCATTAAAGATGAGTTTCATATCTTTGGTCATTACCACCAACATTCTTATAATAAGTCT	351	chr5	15899925	15900275	-	none	FBXL7	0	14.6103	1.54594e-08	3.89447	0	0	0	0	0	0	0	0	8.52261	9.82923	14.5006	0	11.6626	8.0978	21.7768	7.25228	4.72637	8.81977	34.735	7.51966	55.6	2.0964	38.6265	0
100799	TCATCCCATATATAAACGATTTTTTTAAAATTATGGGAGATACACATTTATAAGTGCAGTGAATCTTTGTTTAGAAAAAGCAATTTGTCTGTCTCCTGAATTGGTAAGCTTTTTCTCTTTCCTCTTTCCAGCCCAAAGTAAAACAAAGCACTGTTTCACCTTGTAATTGCGGGTGAGCCACAATGAACTTGCTCAATGTAAAGAAATCTTCATGGCACTTTAAATCATTTTGGGGAGAATATAGTTGTTAGATAAGAGGTGTTGCCTTGTGAGCCACGATTCTTGGAAAATGTCTGAGACTTAGGCACACACATGTGCACATGCAAACACTTGGGCAAACACATATGCAGCTTCCAAAGTTTTGTCAGATTTTATTAGAAGAGGATTTTCTCCTTGGCT…	415	chr5	15886815	15887229	-	none	FBXL7	0.208439	17.9073	1.56711e-08	3.76478	0	0	0	0	0	0	1.66751	0	5.68174	13.6097	22.7866	0	4.66505	5.39853	20.0346	10.8784	4.72637	11.0247	32.9068	14.2038	76.8291	8.38559	52.8158	2.56953
114471	TGAATTTGATATTTTCAACTATCTCTATTGAATTCACTTGTAAATGAATTGCGTTTTTCCCTCTATTATGAACTGAATGTTTGTATCTCTTCAAAATTCATATGTTGAGGCTGTAATTCCCAGTGTGGCTATATTTAAAGATGAGGCCTCTAAGGAAGTAATTCTCGTTAAATTTGGCCATAAGATTCCCTGATCCCATCTTGGCTAACACGGTGAAACCCCATCTCTACTAAAATGCA	239	chr5	15884559	15884787	-	none	FBXL7	0	14.1256	2.46663e-08	3.86476	0	0	0	0	0	0	0	0	6.6287	4.53657	17.6079	0	8.16385	5.39853	26.1321	10.1532	1.89055	12.1272	27.4223	7.51966	48.5236	7.33739	42.5679	0
80477	CCATGTTTGAAATTATACTAGACACTTTAGGAAATAGTTTGGTATTTACAGATTATCTCTACTTGGAATGGTCTGGTAAAAATAGGTGGGTTTTAGAATTTAATTAGTTTGAATGACTCAGCCACATATTCTTGTCCACTACCACCCACTGAAAAAATTGTCTCCAGATGTTCAACAAGGCTGAGTGATCAATAAAACTGGCAATTTGACCAGCAGTGATCTGGGACTTAAGGGAATGTACCTATGATCACATTTTGGACTTTCTGCCCCAATATTTCCAACAAAAATGACGCATATTTCACCACCTGAAGAATGGTAAGTGAATTCGTGGTGCCCAATTTGGTGTTATAAAACCCATTCTTACAACACGAAAAAATTGTTATGCATAAAACTTGTGAT…	784	chr5	15883189	15883972	-	none	FBXL7	0	15.1616	2.713e-08	3.85566	0	0	0	0	0	0	0	0	5.68174	5.29266	19.6794	0	2.33253	8.0978	14.8082	17.4055	3.78109	4.40989	26.5083	15.8748	66.72	12.5784	39.4147	0
52603	ATATTTCTTTAATATTTTCTTAAGATGGATTTCAATAGAAATTAGAATCTACTGAACCTGCTGACTTATTCTACTGCAACGTAAACCATGTGTCTTGGCTACATTTCAGCATTAACAAATCTGCACTACTTTTCTGGTTCCTCCCAGTAACTTTATTCTACTTGTTCTGTGACACTTGTGTTAAGCGATTTCTGCCAAGTTTGGTTACTCTTCTCT	216	chr5	15864726	15864941	-	none	FBXL7	0	11.2823	3.79884e-08	3.79728	0	0	0	0	0	0	0	0	1.89391	7.56095	10.3576	0	3.49879	5.39853	14.8082	7.25228	1.89055	8.81977	20.1097	14.2038	41.4473	8.38559	32.3201	2.56953
98803	GGGGAAACCACTCCCACAATTCAATTATCTCCTATCAAGTCCCTCCTACAACAGGTGGTAGTTATGGGAGCTAAAATTCAAGATGAGATTTGGCTGGGGGCACAGCAAACCATATCAAGGAATTTGTTTCTAATTCGCTAATTCTATTCATCCATTCACCAAATGACTATTAGCCTCTCCTAGAGGATCTCTTTCAGATGCAATGAAGAGAAAAAACAAACTGATACTAAATTGTAATAGGC	242	chr5	15849346	15849587	-	none	FBXL7	0	13.8697	4.34805e-08	3.80819	0	0	0	0	0	0	0	0	2.84087	8.31704	12.4291	2.3417	5.83132	6.74817	29.6164	11.6036	0	9.92224	30.1646	17.5459	47.5127	3.1446	33.8967	0
63084	AAGCTGGACAAATGATGCTTACTTACCCATCAGAGACCTTTTGGGGGCTGGAATGGATGTTTGGAGCCAGAGATGGTTTCTCTCCTTATGAAATTTTGAGTTATAATGACCACTTAAGTTTAAAATGGTAATCCTTCCCATCATGTAAAGAGAATCCTTCAGCAAATGAAAGCAGCACTGCCAGAAATCAGAGCCAAGTCTTGGAGGGAGAATCAGTTCCTGAGATCATTCACAGAATGTCTGAATTTAGCCAGCCTAAAGGAAGACAATACCAGACCTTTTTATCTGCAGCAGCC	296	chr5	15865020	15865315	-	none	FBXL7	0.208439	18.3247	5.10154e-08	3.68457	0	0	0	0	0	0	1.66751	0	6.6287	11.3414	26.9297	0	5.83132	8.0978	30.4875	5.80182	2.83582	11.0247	37.4772	18.3814	68.7418	11.5302	48.086	0
96132	GCTAAAATAGGAAAAGAGGCCATTTATGCATCACTTTCAAACACAAAGTACTTGATAGAGAAAAAAAAATTCTCTGAACAGTGGTCAGACTCTCCAAATAGACAAGCTGATGCCAAATAAAAGGAGTGATTGTGAACGGACCTGGCAGCACGTTCTTCAGGAAATGGCCGGGTGTGTGTATCCTTGCTGATTACATGTATAATAGCTCCACAAGCAATGCTGTCTATCAAGAAAGGCTGCATCTCAGAGTCGTGTTTTCAAAAGGAAAGAGAATGAGCACTCAGCTGAGCCTGTCTGGAAAGAGGCAAAGCGGCTCTAGGAGAGGGGAAGGAGTTGGGAGTTCTTACATGCTGGCGACAGCCAAGCCGCAAGAGATGAGCAGGGCACAGAGCACACGTT…	693	chr5	15850717	15851409	-	none	FBXL7	1.23179	29.8624	5.103e-08	3.36646	0	0	2.89748	0	5.28935	0	1.66751	0	20.8331	10.5853	33.1442	2.3417	8.16385	10.7971	58.3617	24.6578	9.45273	59.5335	41.1335	26.7366	91.9928	7.33739	70.1583	2.56953
86422	ATAATAAGTCTGTTGAAAGCTCTTTCCCTTCTCAGTTATTTGCAGGAAGGTCTTTATGGGCTCCTGAAATTTTTTCTTCTCATTAATGATTTAGATTATGGGTCTTTTTGTTTCAGATTTCCCTTTCAGGCCTCTGAATAGTTCCTGACTGGGGAGACTGCATGACATCACCCTTCTGAGCTTCTCTAAGGCATTGATATGGTTGTT	207	chr5	15899729	15899935	-	none	FBXL7	0.312659	16.9995	5.33381e-08	3.59031	0	0	0	0	0	0	2.50127	0	15.1513	7.56095	23.8224	0	11.6626	13.4963	33.1007	9.42796	2.83582	13.2297	37.4772	11.6972	51.5564	6.28919	34.685	0
63541	GTGGAAGATCCTTGGTTTATAGGGTGAAAAGCCCAAGTGGCAGGATAACCATCCATAAACCAGCCTCAGGAAGGGGCCAAGTAGGGATAACTGAAATTAGCCACTAACTGATGATAATGGGGATTATCTGGGGGTAACTTTGGGGATGCACTAAGCAACATACATTGGGGTTGCTTTTTAAGGAAAAAACAGTGTACTTCTGAGAAAGGAAATGCTTTTTGGAGTCAGGACAAATTTAGGCCTCTCTAATCTAAAAAGTCCCTTTGCCTGATTTTACGGCCATAGTGAGAAAAGAG	296	chr5	15886499	15886794	-	none	FBXL7	0	12.8464	5.82572e-08	3.78717	0	0	0	0	0	0	0	0	7.57566	9.82923	14.5006	0	4.66505	0	20.9057	13.0541	1.89055	9.92224	30.1646	13.3683	43.4691	2.0964	31.5318	2.56953
106149	CATTATTTAGTGCAATAGACTGAATGTGTTTATATCCTTGCAAAATTCATGTGTTGAAACCTGATTCCTGATGTGCTGATATTTGCAAGTGGGGTCTTTGGGACGTGATTAGGTCATGTGGGCAGAACCTTCATGAATGGAATTAGTGCTTTTATGAAAGGGACCTTAGAGAGCTCTCTTGCCCTTCTTCTACCACGTGAAGACACAGTCAGAAGACAGTCATCCATGAATCAAAAAGCAGGCCCCCACCAGGCACCAATCTGCAGAGGCTTGATTTTGGACCCCTCAGCCTCCAGCTGTGAGAAATACATTTCTGTTGTTTATAAGCCATCTAGTCTGTGGTATTTTTGTTACAGCATCCTGAACAGAATAAGACATTCAGTGAACTGTAGTGGTGGAG	400	chr5	15901219	15901618	-	none	FBXL7	0	12.7664	5.90571e-08	3.77028	0	0	0	0	0	0	0	0	3.78783	6.04876	20.7151	0	3.49879	5.39853	16.5503	13.7793	0	4.40989	31.9927	12.5328	40.4364	9.43379	33.1084	2.56953
36531	TTGAATGATCATATGTCTGTGGAAGAAAAGAATAAATGGACTCTGGAGACAGAAATGTTCAATGCACAGTGCCATATGCCTGCAGTCATTTACAAATGCACCTATTCTCACACTTGGCTGCATGTTGAAATCACCTGAGGGAGTTTCAGAACAACACTGATACCTGGATCCTATCCCTAGAGACCATGATTTAATTGATA	200	chr5	15889753	15889952	-	none	FBXL7	0	11.1278	7.76091e-08	3.7331	0	0	0	0	0	0	0	0	3.78783	8.31704	13.4648	2.3417	2.33253	0	18.2925	14.5046	4.72637	8.81977	18.2816	12.5328	40.4364	4.1928	26.0137	0
23999	TCTCTAATAGTTGTAAGGATAAAATTTGCAATAATTCTTTTACAGTGTTACAGAATTCTAATGTGAATAAGAAAAAAAGGAATAAGACTGGAATACCAAGCCATGAACTTGGAAAGAAATCCAAACTGGCATACTGGTGAATACTACATTTTCTTGAACCAATGTGCCAACTTGGAACAATTCTTTAACTTACCTGTTTCTATTTCCTCAACTTATATCTATCGGTCCTCAAAATAGAGACATGACAAACATACACATTCAATAATTATACACATATACACATATACCAGATGCTGTAGCATTTACAATGAAGTCACCCTTTGCAAATCATTTTCACATATGTCTGCTAGTAGTTAAAAAGATACCTAACTTTATTGGAGGAAAAAATAAATCATCTAT…	1197	chr5	15857080	15858276	-	none	FBXL7	1.10117	31.209	8.79959e-08	3.40314	0	0	1.93165	3.44711	1.76312	0	1.66751	0	8.52261	15.1219	43.5018	0	16.3277	12.1467	47.0378	29.0091	11.3433	14.3321	38.3913	24.23	130.407	6.28919	100.113	2.56953
7168	TATTCTCTCTTCTCTTTCTCTCTCTCCCAAGAATGTAACTTGAGCTGTGTCTCATTAATGCCACTTTTAAAGAAAAATCAGATTTTAAGCTCAACCAGTCAGAAGCAGCCAACAACCTGTATAACTAGGGACTTTGCAACAAGATGGACCAAATAAGACAACGGTATAATTGTAACCAATCAAATATTTTCTTGGCTTTCCTTTGCAGGTTATCATATAAAAGTCCCCCTACCCTTGC	238	chr5	15846620	15846857	-	none	FBXL7	0	12.436	1.08016e-07	3.71302	0	0	0	0	0	0	0	0	3.78783	6.80485	13.4648	0	2.33253	5.39853	19.1635	10.8784	5.67164	8.81977	24.6801	9.19069	53.5782	2.0964	33.1084	0
4926	CTAATACATCCCCTCTATTTGTCCATAAGTAAATATTACTTTGGTAGTTTGAAACAAAAAGCTGTTAAGTTTTTCTTTTTAAGAACAATCATAGACTTTGGAATCAGACAAGCTTGGGTTCAAATTGTATCTTTATAGCTTTAAAGCAGTGTGACCAAGTTCAAACTATTTAAACTCTCTGTTCTTATTTCCTTAGTTGTAAAATGGATAATATGGAACTCTCCTTGTTACATAAAAATTAGTTTAGAAAGTACATTTAAATTCACTATCACAAAGCCTGGCAAACTGTAAATGTTCCATAAATGTTGGTTCTCTTCCCTCCACTCCCTGCTAATTACAAAATATCTGCTTATGAAGCTGTTTATAGTTTAAAAATAGAAATATATTTCTCTACAAAGA…	717	chr5	15855415	15856131	-	none	FBXL7	0.76956	25.2312	1.13825e-07	3.4286	0	0	1.93165	1.72356	0	0	2.50127	0	3.78783	12.0975	26.9297	0	13.9952	13.4963	40.9403	20.3064	3.78109	17.6395	51.1884	24.23	75.8182	4.1928	91.4422	3.85429
12944	TTTATGGGACTGACACCAACTTCCTTAGACTGAAGGACTGTCAAGACAGGCTTTCTGTAGGACGTGTGTTTGAGTTAAGTCTTAAGGATAGTCAGGAGAAGGTGGAGATGATAGGTAGTCTTCTAGAGAGAGGAAGCCTGGAGCAAAATCACTAAGTTGATGAACAGCATGCCCAGTTTAAAGAACTGTATGCTAAGAACTGAAAGCCACCTGCTTTAGGGAAGGGAAGACTGTGAGTGATTCCAAGTCTGAGAGAACAGGGGACTTTAGTGCATAGTGAGTACTGAAACTTTATCCTAAAGGATATGGATTTGAATTTACAAGGTCTTCTAATTAAAGAGATTTGAATATCAGGATTTATATGTAGAGTGGAAAAAAAGCGCTGCTCTATGCCTCACC…	413	chr5	15867120	15867532	-	none	FBXL7	0	10.136	1.31859e-07	3.67717	0	0	0	0	0	0	0	0	2.84087	6.80485	11.3933	0	5.83132	5.39853	13.9371	8.70274	3.78109	6.61483	21.0238	10.8617	37.4036	3.1446	24.4371	0
107967	GAATGGGGAAGGTGGATTGATTCCTAGTCATTGTGAACAGACATTCCTCTTCTCATGGTACCACACTTTGGACAGGTCAGCTACCCAGAGAAAGCTCTACAACCCCAACACCAACCTGGACTAGGTCCCACAAGAAAGCCTGACATGTCAGGTGCTGGGACACTCATCTCTGGCTAGTCACTGAGCCCAGCAGCTCCAGATGACCTGGCGCCACCACTTCCTGA	224	chr5	15882431	15882654	-	none	FBXL7	0	10.6805	1.43737e-07	3.67271	0	0	0	0	0	0	0	0	4.73478	3.78047	19.6794	0	3.49879	6.74817	14.8082	9.42796	9.45273	4.40989	20.1097	6.68414	32.3491	2.0964	33.1084	0
10955	TACTAAAAAGTAATAGCTATTTATTTAATTTAAAATATTTTACCAGCTTTGAAGTTACAGTGTGTGGATATCTAAGATATCAATCTAAGCTCTAATCTATACAGGCAGAAGTGCTGGTGCTTGTGAAAGCAGGACCTGGAAATAGACTGGGTTCAAGTCCTAAGTCAACCCCCACTAGCTCAGGTCAGATAAGTTGATTAATCACTCCATGCTTCAGTTTTCTCATCTGTATAATGGGAAAAATGAGAGTGCTTCACTCATGGGAGAATTGAAGGAGTTCTTAATAATTATCAAGCTCTAAAAACAGACGAGGCAGAAGCTAAAAGATTTTAATGAACTTCACATTTTTACAGGTATGAATTTGGGTAAACTGTCATAATAGTATGAATCATTTCAAGA…	449	chr5	15849820	15850268	-	none	FBXL7	0.416878	16.893	2.36352e-07	3.4221	0	0	0	0	0	0	3.33503	0	10.4165	5.29266	16.5721	0	5.83132	2.69927	29.6164	14.5046	2.83582	17.6395	31.9927	21.7235	50.5455	8.38559	49.6626	2.56953
41030	TTTAAAAGGCCCTTCTACCTTTGTCACCCTGTAAATGACATGGATAAAGTCATAGTTTATGTGGCTGTGACACCACAAAGACCCAGGGCTGATTTACCTGGCAATACCCCCTTTCTCTACGGAAGCTGTGGTTCAAAGGGACCATAGCTAGAAGCTACTCTGCAAGGGAGGCTATGAGCTTAGCTCTTAGAGCCCAACTGGGAAAGAATATTGTACAATAACGTCTACAAAATTA	235	chr5	15850419	15850653	-	none	FBXL7	0.208439	12.7322	2.4024e-07	3.48315	0	0	0	0	0	0	1.66751	0	3.78783	4.53657	15.5363	0	3.49879	5.39853	27.0032	6.52705	4.72637	11.0247	21.9379	10.0262	48.5236	3.1446	35.4733	2.56953
93203	CTTGTAAGAGGAGGTAAAAGTATGTTACTTGGCTAGGGGTCAGGGGTTGGTTAGTATGTAAAGGGGAACTATAACCTTGACACTTAAAATCCTATCAGAACATCTATTTTACATGTCACCCATCAATGGGAACTTATTGAATGCATTCAAGTTGTATTTGGCTGGTATGTGCAGAAAGACAAACTAGAAACAGTCAATTCACC	203	chr5	15845371	15845573	-	none	FBXL7	0.416878	12.9056	2.63993e-07	3.31502	0	0	0	0	0	0	3.33503	0	9.46957	8.31704	13.4648	0	8.16385	9.44743	23.5189	8.70274	4.72637	18.742	33.8209	13.3683	30.3273	6.28919	18.1308	0
22732	AATACTTGCATACATACATAAAGATAAATATATATGAATGTTTATTAAAACATGTTTAAAAATGACCGCAATATGCATTTATTAGTAACTGGTTAACTATGACAGATAATGCTACTTTAATTTATAGCTATTCAAAAGGAGTTTGGAAGGAGTCATGGAAGTAAACAGCCAAGTGGAAAAACACAAGTATGTATATCATGGTCACATTTTGAAAAGAAAGAAAAAAAAGGAAGGAAGGAAGGAAGGAAAAGTGAATGAAAGCAGTAAAAAAATACATGTGTATCTTAGAATATGGAC	297	chr5	15856782	15857078	-	none	FBXL7	0.795874	25.8691	4.69808e-07	3.35107	2.93637	0	0	0	1.76312	0	1.66751	0	3.78783	9.07314	31.0727	0	17.494	8.0978	47.0378	17.4055	9.45273	25.3568	53.9306	25.901	91.9928	3.1446	70.1583	0
2374	TTACACATTAACAAAATTTATGTCTTTTGAAATAAAAATGCACAAAATTTTGTTTATACCTAAAATATGTAGAGTTATACAATGATGAAAAATAAACCATGGCCCTTGATAATGATTTTACTTTAATTTTCTATGAAAATTAGCAGGGCAAACTTTCAAGCTAAGTGTTTTCTTAATTTGGATGAGGTCAACTAAATTCTGCAAAGGAAGTAGAGACAATGGATTTTGACTTGTTTCTAATATGAGGAAATACCCTGGTCTTATCATTACAACAGTGGATTGTTACTTTTGTTTTATTGTAAACAATTCAAAAACACATTAATGAAGAAATTGATGGGTATTATTTAGGGAATAGCATCTGTTTTTTTTGGTTTGACTGAGTCTGTTATGATCGAATAG…	520	chr5	15854842	15855361	-	none	FBXL7	0.312659	15.6018	5.80061e-07	3.38841	0	0	0	0	0	0	2.50127	0	3.78783	9.07314	22.7866	0	5.83132	8.0978	32.2296	20.3064	2.83582	15.4346	23.766	12.5328	54.5891	2.0964	36.2616	0
61117	TCATAGAGAAGAGGATTAAATAAATCAATATATCTAAAGCTTACAATAGTCAGCCCTCCATGAGTGACAGCCCTCCATAAGTGACTGTATTTGTGCTTCACCCTTGATGTCAGGATTTAGTTTTCCCAGGAAAGTCTTACTTATTTGTATAACCATTGCCCCTCACAGAGTGCTTTGCCTCTAGTAAGCTCCATATGTACAGTGGCCAAACTGAACTAGTAAGAATAAGGGGAATAAACTCAAGGTGAGAAAATCCTAGAACTGGAATTATCTAAACACCCAGGTTTAGTTCCAAATTCATGAAGCAAAGAGGAGATCTATGTAGGCATATATGGCCATGTTTTTTTTTTT	351	chr5	15852795	15853145	-	none	FBXL7	0.423884	15.5749	5.82443e-07	3.3283	0	0	0	1.72356	0	0	1.66751	0	3.78783	8.31704	29.0012	2.3417	6.99758	4.0489	29.6164	10.1532	2.83582	3.30741	21.9379	17.5459	52.5673	6.28919	50.4509	0
55485	ATTTAATTTGCTGTCTCAGATTGTCCATCAGGGGATTTTTGAGGAAAAGTGTTCAAGGATATTCTGAACTTTTGGTTCTGTTATGATGTCAGACACAGGAGACCCAGTCAGGTGTCTGGACTCTGGAAGAGCTCTCTATGCTGAGAGAGAGAACATGGAAGCTACTGGCGGAGCAAAGAATCCAAGAAATTTATTGTTTTTTAACACTGGCTTTTCCTCCCCACTCTACTGGAAACAACACATATGTATTTAAAAGAGTTTCACATATACTAATGCACAGCCAAGCTTCTTGAGTGTACCAAAAGATACTGTCTAGTTTCCATAAAAGGGCTGTATTATGCCTAGATAATACCAAGATTGTGGAGTGACAACCCCCATGAGTAGCGGAGTTAATATTCC…	612	chr5	15887565	15888176	-	none	FBXL7	0.531606	20.0127	6.09744e-07	3.33886	0	0	0	2.58533	0	0	1.66751	0	4.73478	11.3414	27.9654	0	3.49879	10.7971	33.9717	13.0541	3.78109	9.92224	34.735	18.3814	69.7527	13.6266	64.6402	0
95359	GGTGAACTAACAGGGTGAGAACTCACTCATCACCAAAAGAGAGCATTATTCTATTCATGAGGGCTCTGTCTCCATGACCCAAATACCTCCCACTAGGCCCCACCTCCCAGGACTGACACACTGATGAAATTTCAACATGAGATTTGGTGGTGACAAATGAACCATATCCAAACCATAAGAGACAGCAAGAGGAACACAGAAATGGTGCCAGACAGTAAAAGGAATTTTGTCACCAATGTGAGGTCACATCGACCATTCTCCATGGCTCCCATGTAGATATTTTATGACCCTAGCCCACGTGGATCACATCAGACTGGTACCTGTCAAATTCCTGCCTTGATTTATGTGAATATAACTCTATATTCTCTGGCAAAAGCACATGAAAAAAGACTTTTTCTT…	434	chr5	15863431	15863864	-	none	FBXL7	0.428829	13.338	6.69369e-07	3.26672	0	0	0	0	1.76312	0	1.66751	0	4.73478	6.80485	17.6079	0	6.99758	5.39853	24.39	13.0541	6.61691	8.81977	16.4534	11.6972	41.4473	5.241	44.1445	0
79216	GGTAAGGCTAGAAGGTCATGCGAGAAACTGTATGAAGAGACACAGAGTAAGGATGGGCATGAGAGATGAACACGAACAAGTGTGGAAGATCAGAATTTTTTCAGAGGGTAACTGGTTATAAGTGCTATGTTTCTCTTTAGCGGGAATATTAAAAATATAGTAATTTCTTTAGCAAACAGGTGATCAGACCCGCAAAAATTTAGAAAGCATTATGAGTTATTTTAAAAAGAGAAACTCAGTACCACAGATAGG	252	chr5	15877824	15878075	-	none	FBXL7	0	13.2836	7.47685e-07	3.53691	0	0	0	0	0	0	0	0	5.68174	5.29266	25.8939	0	4.66505	5.39853	13.0661	20.3064	0	9.92224	10.0549	8.35517	49.5346	9.43379	44.9328	0
59713	GTAATGTTTTGCTTGGTGGCTAAAGGCCTCTTTAACCTCCAGAGAGGCTAAGTATGGTGCAGACTCCCCTAGGGACACGTGTTCTTCATTCCTGGTGGAGGGCAAGCAGAGGCTATCCTGGCGTCTGGTAGGGATGCTTTAGAATTAGAAAGAAGGAGATTAAACCTGAAGATTTCTTTTCCCTTCACAACTGAGAATCAGGTTACTGTCTTTAAGGATTTCTTCTGGCCGTTATAAATGCTGGGCTTCCAGTTTAATCGG	261	chr5	15879306	15879566	-	none	FBXL7	0.312659	14.0895	1.18784e-06	3.30825	0	0	0	0	0	0	2.50127	0	3.78783	6.04876	25.8939	2.3417	2.33253	8.0978	23.5189	9.42796	3.78109	3.30741	17.3675	8.35517	58.6327	5.241	47.2977	0
115178	GAAGTATCTTTGCTTCTAGATCCTCCTGACATATATAATCTCAATTCAAATCTTTCTCTCTTTAAAGCCCTCTTCGAACATTCAGGTAAGCTCCAATTTGCTTTTAAGCTGTTTTCTCCCTGTGGGACCAGGATCTAATCAGTCTCATTATGGATAGCTATGGTACTCATTCAACCTCCTTGCAACCTTTCCTTTGGGAACAGCCCTTCCTTCAGCTCGTAGCATTTAGATGGAGCTGTCAGTCAGGGCGTTACTCCTCTCCCACAGAAGCTGGAC	276	chr5	15865307	15865582	-	none	FBXL7	0.533048	15.0403	2.94324e-06	3.13742	0	0	0	0	1.76312	0	2.50127	0	3.78783	7.56095	29.0012	2.3417	4.66505	2.69927	20.9057	11.6036	1.89055	4.40989	42.9617	19.2169	52.5673	6.28919	30.7435	0
116525	AAAAAAAGATGAACTTCTAGAAGTGAAAATTAATGCACTAGCTTTCATCATCAAGACAGAAATAATTCTTGAGAAAGAAAACAAGTGAAATTGTTACCCAGAAAACTATCCAAGTCTGGTCCCATTCCTAGAGCAACTGATGCAACTGATCTAGATGGACCTAAACATCAAGATTTTTAAAAAGCTCCCCAGCTTTCTGATACTAATGCAAAATGACAG	219	chr5	15879038	15879256	-	none	FBXL7	0.330584	18.4779	3.09351e-06	3.26884	0	0	0	0	2.64467	0	0	0	2.84087	8.31704	30.0369	0	9.33011	2.69927	33.1007	20.3064	2.83582	14.3321	24.6801	11.6972	68.7418	5.241	61.487	0
79083	GAGAGATATTCCAAAGTTTGGAAGGATAGTGCAAGTCAGCTATGATCTAGCATGTACTGAAGGACTTTTCACCAAGATGTCAGCTCCCTACACACTCAGAGACTTAGCTAGCTTTGACCTTGAAGCCATTGACAGGGCATGCAAAGGAGAGATAATGGGTTGTTCCTGCTTGGAGGTTTGTGTTCTAGATATACCTTTATTATATTTTAGACATTC	216	chr5	15852058	15852273	-	none	FBXL7	0	8.30627	3.41427e-06	3.33746	0	0	0	0	0	0	0	0	0	5.29266	12.4291	0	4.66505	5.39853	13.9371	9.42796	3.78109	4.40989	14.6253	14.2038	18.1964	2.0964	24.4371	0
64524	AGATCCCTACAGACCCCAACACCAAGAAAAGTAGGTTTTTCTTCTTTCTTTGCAGTTCTTTGGTATAGATTGATGTTACTAGGGTGGTGGAAGGCCATCGTGTGAGAAAAGATTACACTTAGTATTGAGGAATGTGGTGAGGATGACTTCCTTTTTCTTACCCTAATAATGGACTTTTGTTTTTAGAGATGCTGTCCTGTAACCTCAGGTTTAAGATGAGGATATTTCTGGATCCAGTGTTTGTACAGTACTATTAAT	258	chr5	15900277	15900534	-	none	FBXL7	0.416878	17.5841	4.01068e-06	3.20078	0	0	0	0	0	0	3.33503	0	6.6287	8.31704	24.8581	0	9.33011	2.69927	29.6164	16.6802	6.61691	12.1272	23.766	14.2038	82.8946	4.1928	39.4147	0
31726	GTTTAATTTCTCCTATTTCTAGAAAAGCATTTGAGTTGAACTTGAACTGGTTCTGGAACCCAGATCTCCCATCTCAACCTTCTTCCTTCTTTCCTTTCCACTAAAGCATGCTAATGTAATTAACATTCAGGTAAAGTCACATGGCACATAGGCTGAAGATTACCCAGACAGACTTCAGATCCTACTGAAAGATAGAATAATTAATATGATGGCTAACAGGATGTTTGTCAAAATTATATTTTTGGAATTTGATTTTTTTTCACCTTTAGGCTGACCTATTAATTATAGTCAATTACCGTATGTACACACTTATGAGGAAAAAACACTTCTTAGTGTTGCATGTCCAAATGAACCCACTGTGCTGAGGCCC	370	chr5	15854322	15854691	-	none	FBXL7	0.312659	11.2996	5.46527e-06	3.12077	0	0	0	0	0	0	2.50127	0	2.84087	6.04876	10.3576	0	10.4964	2.69927	18.2925	7.97751	5.67164	5.51236	20.1097	10.8617	38.4146	2.0964	39.4147	0
60331	AAAGGCATTATTTGTAGGGCATCACTTTGAGTTTATTGTGTGTTTCAGTATGTATAAGTATCAGGAGTTTATTGACAGAAATATTGACATCTCCCTAAACAGCTTCCATTATAGCTACTGTAGAAGTAACTTCAGTCCTCTATAATCCCTGACTCCCCGCAACTTCTGCAGTGTTCTTTGTTCAAAAAGATGTGGCTGACCTTGAGGGTGGCGTGCTCTGTGAAGTGCCTGCCAGAACAACTGAAGGATTTACATAGCCTTTTCACACTCACGTTGTCCTCATAGTGCAG	290	chr5	15878187	15878476	-	none	FBXL7	0.330584	12.0499	7.17534e-06	3.11388	0	0	0	0	2.64467	0	0	0	0	3.78047	13.4648	3.51254	3.49879	5.39853	15.6793	10.1532	1.89055	4.40989	11.883	13.3683	61.6655	18.8676	25.2254	0
30494	ATTTATATGGATTTAGCCTTGAGAATTACTTTATGCTAAGAGACTCAGGGTGACTACAACCCCCACTCACGGGCAGAACAAGAGGCTAAACATGTCCTTATGCTGCAGAGTATATTTCAAACTATTAGAGTGACCCATTATTTCATTAATTTAAGTACATTTCTGGTTGCTGATAAAATGAGTTCTAGCCTGTTGGCGGACAAGAAGAGAAGAACAAGGCTTTATTCCTATGGTTAGGTGCCGTTGCGACCTGAGGCACATGCTATTGTATGAGTGATTCTGACAAAGAGAATATCTGTTTTCAACTTGCACTTCATTTTGCACACAGGCTAAAATAGGAAAAGAGGCCATTTATGCA	358	chr5	15851380	15851737	-	none	FBXL7	0.858688	15.4493	1.00193e-05	2.90101	0	0	0	1.72356	2.64467	0	2.50127	0	4.73478	11.3414	18.6436	3.51254	2.33253	4.0489	35.7139	13.7793	7.56219	14.3321	10.0549	10.8617	61.6655	2.0964	46.5094	0
55637	GTTATCATATAAAAGTCCCCCTACCCTTGCATTCTCTTGGTGAAACTCCAGAACATCTTCTGGCTTGGAGCTACCTGATTCATAAATTGCTGTTTGCTCAAAGAAACTCTTGAAAATTTTATTGTGCCTCGGTTCACATATTTAAGAGATTTTGTGACTTATATTTCTTTCACTCTTTTTGCCATGGAGAGATTTTTATAACAAATATATAATAGTGAAATAAAAACAATGTAAACTCCATTAATTTGTTAAAAAACTGACATGTATTAATACTCTTCAAACATTAGAAGATGAGATGAATTTATAAGCTATGGATATGGAAAGAAGAACTCTATTACAATCAGTAGAAAAACAAGTTATAAAAAAGGATTCATTCATTGTGATACCCTGCTTGATCAA…	522	chr5	15846128	15846649	-	none	FBXL7	0.747463	16.1548	1.01907e-05	2.96043	0	0	0	0	2.64467	0	3.33503	0	9.46957	6.04876	9.3218	0	8.16385	5.39853	35.7139	10.1532	6.61691	29.7667	21.9379	21.7235	63.6873	2.0964	28.3786	0
29000	TGTAAGCAGTGGAGGTAATACTTCCCCTTCCCTGGCACTTGAATGGAAAAGATTGAAGCAAAATGAAAGGCCAATCTGTATGCAATTAAATGCTTCTACTGGCAATTGCTTTTCCTTCCCCTGCTAAAAAAGCAGACATCCAAATTTCCCACCTTCTTAGTGTGTCCCCCCTCCTGTGCTAAATTGCCACAGTTGGGAGTAGCGTCTTCAGGCAGTTACTGGCAAGAATAGATGCATCAAAGGAATGAAGATTTTTGTTTTTGCTTTTAACTTAAAAAAAAG	282	chr5	15844108	15844389	-	none	FBXL7	0.501719	13.0973	1.2501e-05	2.9827	0	0	0	0	0	1.51248	2.50127	0	2.84087	4.53657	10.3576	0	8.16385	10.7971	14.8082	13.0541	6.61691	23.1519	18.2816	14.2038	53.5782	0	29.1669	0
31872	GCCAGGCATTGGTAAGATCTGGCCACATACCAGTTTCCTTCCTAGTGGATTATACCATTCCTTGTCTCTGAGAGGTTGTGAATGTTCCTTCTTTCCCCCCGCCCCACTTTTTTCTGCTTGTTTGTCTGCTTCCTTGACTATTTATGATGTGGAGAGACCAAGGCCCAGATATTTCTACAGGGACACAGAAAAAGCAAACTCTTAGGGGAACCGCAGTACTGGCAGTGCCAAGGATAATACAGCTCTAC	248	chr5	15889056	15889303	-	none	FBXL7	0.747463	13.9457	1.8675e-05	2.86188	0	0	0	0	2.64467	0	3.33503	0	5.68174	7.56095	10.3576	0	9.33011	5.39853	25.261	10.8784	4.72637	3.30741	25.5942	14.2038	47.5127	8.38559	44.9328	0
26273	TCCAACAGCAGTCAGTATGTAGCTTCTGACTAATACCAAAAGGTTTCATGTCTATGCACGGTATTCTATTATAGTTTTCAACAGAAAGTACAAATTACCGGATGCCTGATAAATTCATCCAGAAACACTAAGAAAAACAGATGCTATTTTCCAAACCTTATCAAATGATTCCCTTTCTCCTCACTCACCAGGGTAGTTTGGGGCCAAATATGATGGAAAAGTAATTTGCTGACTTCTGAC	240	chr5	15852502	15852741	-	none	FBXL7	0	10.8592	3.29894e-05	3.09579	0	0	0	0	0	0	0	0	1.89391	9.07314	10.3576	0	2.33253	0	15.6793	7.25228	1.89055	6.61483	17.3675	20.8879	46.5018	0	33.8967	0
119635	GTCAATTCACCGCATCAGAAGAGTACACAGAAATAACCATTACCAGCATAAGGAAATTGTCCAAATGTGTGCTTCCTCAAGTTGAAAGAAACCATTTCTCAGAAGGAAGAATTTTCACCCAGCAGTTAAATCAGAGGGATCAACACAATTGGGTACTAACTTGTGCAAGGCAGAAGAGAAAGTGGGAAGCAGTCCCAGGCTGCAGGATGGCTTCATGTCTGGAAGCACAGCAC	233	chr5	15845149	15845381	-	none	FBXL7	1.57151	19.5472	6.02598e-05	2.63614	0	2.41537	0	1.72356	1.76312	0	6.67005	0	9.46957	7.56095	25.8939	0	13.9952	5.39853	27.0032	19.5812	7.56219	29.7667	36.5631	27.5721	61.6655	2.0964	38.6265	0
4769	AGAAGGAAAGATTCATATTTTCAATTTTATTCATTCGAATATTTACTAAATTCATACTGTGTGGCAGGAATACAGCAGTGAAAAACAGAGGTGAAATCTATGACCTTGTGAAGCTTTCATTTAGACAGGAAAGCCAGAAAGACTACACGCCAATAAGCAAATGTGTGTGTGTGCTGTGGTGAAAGGGTTATGAAGAACCAGAGGGGGTAATAAGGAGAGAAAAATGGGAGTTTATTTTATACTGTGTATGTTAGAAGAAGAGAAGAATACACTTTGACAAAG	282	chr5	15843315	15843596	-	none	FBXL7	1.1216	14.3938	7.69258e-05	2.62345	0	0	2.89748	0	4.40779	0	1.66751	0	4.73478	6.80485	12.4291	0	8.16385	8.0978	23.5189	9.42796	4.72637	28.6643	24.6801	21.7235	49.5346	0	25.2254	2.56953
42665	ATCCTAATGCCAAATCTGGTAAAGAAATAACAAAAAGAGAGTTACTGACCATATTGGCTTATGAATACAGATGCAAAAATTCTGAATAAAATATTCAGTAGCATATGAAAAGAATGTGAACATGAACAGTTTGTTTTAGAAAGGCCAGAATGAGTTTGATCAGAAGATCTTTTAGGGTAATAAATTAAAGGAGGAAAAAATTACATGAGTATATAAATTGCCATAAAAAGACAAAAATGAAATAACATAAAAT	253	chr11	58858459	58858711	-	none	GLYATL1P3	33.1602	196.387	1.07231e-09	2.376	54.3228	27.7767	27.0432	24.9916	39.6701	49.1556	25.0127	17.3092	246.209	280.511	166.757	63.2258	313.725	418.386	283.969	196.537	316.667	93.7101	110.603	89.4004	149.615	52.41	253.831	106.635
121806	AAATGTACAAGGAATAGCAATTATAAATGATCAGCACATGTTTTTTGTACCTCTCCAATTCGTCATCTGGGTGGCCTGTCTCAGCCCAGCTTCCAAGCTTGCTTTTATTGGTGGCATAGAGCTTCAGGATATCTTCCGTAACAAAGAGGAGTGCTCTCGAATGCTCTACCTTCACTGAATTTGAAAATGCAGCTGCTCTTATCCCCTCACCTAAACTTTCTTGAA	225	chr11	58861410	58861634	-	none	GLYATL1P3	9.36318	64.6041	5.49769e-09	2.52513	16.15	7.24611	9.65827	5.17067	7.05246	18.1498	6.67005	4.80811	70.0748	115.683	46.609	17.5627	97.9661	109.32	112.368	76.8742	93.582	36.3816	45.7039	21.7235	47.5127	11.5302	92.2305	38.5429
36072	ACAACACCTCAGTGAATTTAAAAGAGTAGATGTTTTAAAAGACCGGATTTTAAAAGAATGACTGAACATAGCCAAGTAAATATTCAAAGAATTATAAAAAGAATATCAAAGTAGACTAGAAAATAACAAATGGAACAATTTGTAAAAATGAAAGCCATAAATAATGAAATGTAGAACAAGACACAGTGCAAATGATATATAAAGCCAAAAGTTCATTTTTAAATGGCAAAAAGAAAGAGCAGAAGAGAGAGAGAGATAAACTTCTGGTAAGGCATTT	277	chr11	58859674	58859950	-	none	GLYATL1P3	0.735089	19.1875	4.72206e-06	3.08445	0	0	0	1.72356	2.64467	1.51248	0	0	5.68174	7.56095	6.21454	2.3417	5.83132	2.69927	6.96856	34.8109	13.2338	51.8162	60.3292	8.35517	85.9273	4.1928	11.0361	0
94526	TGTTAATTTACACAAAGTTATATTCCAGAATCAGGAAGCCCCGCTGTCGCCAACACTTGAAGGAGAACTATGTTCCAGTTTTGGTGTTGAACTTCTCACGAAATACCTACTACCAAAAATTGTGACACCTTATTAGACACTTCCAAAGTACCCCCCAAAAGCTGTTTAAAAGACCATTCCATTTTTTCCTACACAAAGTGCATACTAAAATTTCACAATAATCATCTTCAGATGTACATTTTATTTAGTACATTTCACAGT	261	chr9	88642393	88642653	+	none	GOLM1	37.7892	125.878	0.000124923	1.59432	14.6818	36.2305	36.7014	21.5445	24.6836	61.2554	65.8668	41.3497	170.452	87.707	119.112	30.442	100.299	133.614	206.444	100.081	84.1293	177.498	216.637	77.7031	253.738	29.3496	55.9689	170.874
9333	GTCAAGTTCTGAGTTGTGGTTGCTGAAAAACAACTCTGTAATGGCATATTGTTAATAAAATTTAAACCACAATAAACTGTCACCTTATTCCAGTTAGAATGGCTATTATCAAAAAGCCAAAAGATAACAAATGTTATCGAGGATGTGGAGAAAAGGGAACCTTTATGCCCTGATGGTGGGAATATAAATTAGTAGTCATTATGGAAAACCATCTGTAGGTTCCTAAAGAAATTAAAAATAGGACTACCATATGATCGAGCAATCCCACTACTGG	274	chr6	76633684	76633957	+	none	IMPG1	1.83438	10.8191	0.000193561	2.10314	0	0	5.79496	0	5.28935	0	1.66751	1.92324	6.6287	18.9024	11.3933	19.9044	4.66505	14.846	3.48428	4.35137	26.4676	4.40989	5.48447	11.6972	5.05455	13.6266	15.7659	6.42382
41798	TGCTGATTCTCAGTGTTGACTGTATGTCTGGATTTTGATGACCCATGAATATGCCTGTCTCCATTTTCCTTGAGAAGGCAAATCATCTCTCTTGAGATAGCCTAAATGATAATTGTACATTTTCAGTTTTTAATTTCCTTCCCAATCTTGATGGTTAAATTCTTCATATTCTACGGTCAGTAATTCAGAATTTCTTTTACTGATTACCTGAAAGAGAAATAGTTTTAAGAACTTAAGAAATGCCACCCAAGGTCAAACCAATGGTTCATTCCAATATTACTGCCACTGGTAGATAAGAGGATGTGCTTGCCATTTATGACATCTTCTTTGAAATGTTGAAGATGGCCTCAAAATATTCTTAACTTTATAACCTACTAGAAATGTACTCCATGCCC	395	chr6	76631677	76632071	+	none	IMPG1	1.61041	9.01392	0.000249648	2.08828	0	4.83074	1.93165	1.72356	0	1.51248	0	2.88486	18.9391	12.8536	9.3218	12.8793	5.83132	13.4963	5.22642	1.45046	12.2886	2.20494	4.57039	9.19069	2.02182	13.6266	12.6127	7.70859
68136	TTGTTGCAAATGATCTGTGAGTAAAATTTTCAGGGAAGGTGGAAGCAAACCTGGCTTATGATCATTTTGACTATCATCCAAGAATAGTAAAAATATGTTTCGCTGATTGCATTTGGGGTTTTAATAATAAGTAAGTGTCTTTTTCTTCAGAATTTACTGGTTGCCAAGTACATGACTCTTCTATATTTGAAATATGGTGTGTGCTGATT	209	chr6	76631476	76631684	+	none	IMPG1	3.39806	11.9271	0.00172842	1.60767	2.93637	7.24611	3.86331	5.17067	1.76312	4.53744	1.66751	0	12.3104	20.4146	20.7151	17.5627	10.4964	14.846	9.58177	2.17568	18.9055	3.30741	1.82816	6.68414	12.1309	13.6266	13.401	12.8476
80095	AGAAAAGTGAAATTATTTACAAAAGTCACACAGCTAATTAGCTATTAGAGCTAGGACTAGAATTTAGTTATCTTGACTCAAGATAACCTGCTTTTGAAGTATCCTTTTATTACTTAGTTCTGTGACCTTGCTGAGATTTTCTTATATAAAAGATTGGAAATATGTAAATATTTAAATTTTATTCTTAAATACTATTTATTAATACAGAGAAATACTCCTGCTATAATTTTAAGTGACACAATAGTACAACAATTGTTAAGAACAATCCACCTGTGTCAAAGAGACACATACACAAACACACATCCATATACACATACAAGCTTGGAGAAAATTCTGAAAGGATCTCATTGTCCTAGATGGTGGCATTATGGGCAATTATTTTGCAAATGTCACCCAGTG…	1669	chr2	170566218	170567886	-	none	KLHL23	1.54394	12.5948	6.2802e-07	2.53038	0	2.41537	2.89748	0	0	4.53744	2.50127	0	22.727	14.3658	6.21454	12.8793	6.99758	12.1467	13.9371	13.0541	10.398	9.92224	21.0238	14.2038	7.07637	15.723	1.57659	19.2715
66026	CTATGTTGCATTAGAAAATAAAAATGAGATTCCAGAATTACTCTTTCTGGAGGAAGTGGGACTGGACTAATCCTCCCACTGTAAATAATTTAAAAACTGGACAAAAGATATGAAATAACAGTTTTCAAGCATTGGTCAACAAGCAGTACAGAACTGTGGTCCCTGAGAGAGAAGAAACAAATGAGGAGAGCCTTATAATTGCCTGTACTTTTGCCTGGAGACACATTCCAGCCCAAGGTGCGGGGAGGGGGGGATCCCCCAAACAGACCACAGTAGTCTTGTTGAGTTGAAGGAATGGAGATCAGTTTGGGGAGGCAAAAGTGGCTGGAATTTGCAGGGCAGAGTACCAGAAAGGAAGAAG	361	chr2	170564287	170564647	-	none	KLHL23	1.04364	11.1661	1.1876e-06	2.6957	0	0	0	0	2.64467	3.7812	0	1.92324	14.2044	15.878	7.25029	12.8793	13.9952	8.0978	12.195	5.0766	11.3433	13.2297	22.852	9.19069	8.08727	11.5302	0	12.8476
102501	GAAAATATTAACACAATATAATGCAAACATTTGTCACAAATATGCGAATGTTAGCATCCTCCCTATATGAAGTACTCAGACAAATAGAGAAGCAGAACACAAGACCCTGCAAATAAATGACCAAAGAACATGCCCAGACATTTAAGAAGTAGTAGAAATGACTTAAGTCGGATCTCAATGAACTCATATTTATTCGGTGTATAGGATGTGTGAGATGCTGGCATATGGCAAGTACAGGGCTGCTATTCAGCCAAAGGCACTGTTAGGGGGGTTTGTGGCCAGCATCCATTCTTATTAGTTGGTGATTATTATCTGATAGGTTGGTGCCTTGGTGCCTTGTAGTGTTTGTTAAATGTTTTGATTATTAGTGAATGTGTGTCAAATGCTTTATCACCTCGT…	514	chr2	170565131	170565644	-	none	KLHL23	1.22465	14.1576	1.69903e-06	2.74157	0	0	0	2.58533	1.76312	3.7812	1.66751	0	22.727	18.1463	9.3218	15.221	16.3277	5.39853	26.1321	3.62614	11.3433	29.7667	22.852	16.7103	8.08727	15.723	0	5.13906
81002	TCCAGAAATCTGCAAGGGAGGATGTCCCCTTGAGTCTGTGGTTGAATACTAAGATATACTTGTGTAGGATGAAACCCAGTAAGTCTGGGCAGAGAATGACCCTCGGAACTATAAGCTAAACAATTCCCAGAGCTCACACAAAGCTGGAAGACACTTGAGTCCCAATCAGCCCCAGAGAAACACTGGTTTAATCAACTGGGGAGCAAAGAAGAAAAGAGAAAAGACAATACTTACGTAAAAAAGGCGGAAGAAAAAAAAGGATGGCTACATAGAA	274	chr2	170563996	170564269	-	none	KLHL23	1.38243	12.9435	1.80433e-06	2.63938	0	3.62305	1.93165	1.72356	0	3.7812	0	0	16.0983	15.878	7.25029	18.7336	10.4964	5.39853	33.9717	7.25228	11.3433	16.5371	27.4223	6.68414	8.08727	15.723	2.36488	3.85429
90732	GAGTACTGCTGCTGCCTGGATTGCTGCTGCAGTCCAGCCTACTACTGACATTATATGGTTTGATACCAAGAGTGGGCAAAGTAGCTAATAAGTTGAGCTCAGGGCAACACGGATGAGGATCACCAAGGAGGTGACACCCATGGTAATCTACACCAATGCTGGGCAGTTTATCAACGCTTAACATTGTGGTTAATTACCTGAAAGTTACAGAATTAGTTAGTCACCAGCCCATGTAGGGCCAGGCCATGTGGCCAGATCTATGAGAGGAAGGATGACCCTCTCCAACCAGGTATGGGGACAAACGGCAATCTGTTATTGCCTGCCCCAATGCCCCTAAAGGTAGGGAAACAAACAAACAAACAAAACCTGGTGTTAGCCATGGACCCTCCAAGCCCCTCA…	2435	chr2	170568252	170570686	-	none	KLHL23	7.16846	33.297	2.91256e-06	2.01653	8.8091	8.45379	9.65827	4.30889	7.93402	5.29368	10.0051	2.88486	76.7035	36.2926	29.0012	51.5173	23.3253	48.5868	45.2957	13.0541	13.2338	51.8162	47.5321	18.3814	19.2073	31.446	5.51806	21.841
47702	TGGGACCCCAGGGGAGAGCCCAGGGACCCCCACCCCTATCCCCTGGCCACACAGTGGTGGAACACACCTCTTATAGTGTTTATACCCCCACTGAGTTGCAGGAATTAGGTAAACAGTGTCGGCAGTATCCTAGGGAACTGACAGCATTTCTTGCTCTGCCTCTGAGAGGGAGAAGCTGGATTCTATCACAACTCATCCCTCCCTTCATCAGCAGCTGCAGCTGTGTGGACAGTTAGCACAAGGGCAGGATGACCACACGTTAATCGAGTGGCTAATGGCAGCCATATGGACTGTTTGGAATGACGCCAGAAAGATACCAGAAACTGTGAGTAAATGGCAGTCATATACTAATTTGGTGCAGATACTCTGAGAGCTGGGTATGCAGCAGGCTGTTTGATC…	1270	chr2	170571854	170573123	-	none	KLHL23	11.4423	46.947	1.17671e-05	1.85916	11.7455	10.8692	22.214	4.30889	7.93402	12.8561	15.8414	5.76973	107.953	49.9023	31.0727	63.2258	47.8168	43.1883	69.6856	39.8875	29.3035	55.1236	63.0714	28.4076	28.3055	57.6509	3.15318	33.4039
78821	GCAGCTGCAGGTGTGGGGGCTGCTGAATAAAGCCATGTCTCATCTACCTGCTGTCTCTCTAGTGTTCTTCCAGTTTCCTGCCCCACATCCACCCACTCCCCTCAGCCCTCAGCTGGGGCTGGAACCTAACCCTGAGCATACTTGGTGTAGTCAGCAGGATGAGGTGAGTAGGTCTTCAGCCCCTGAGGCTCCCGGGTTGGCTATGTGGCCACAGCATGGGCTGTGGTACCCCGTGGCAGAGATGCTGCTCGGGTAGGCCCCAGTGGAAACGTGGGAGGCAGTGAATGGGTCTCCCATGAGTGTGGAGAAGCATCTGGAAGCTCACAGCACCAAGAAGGAATGACCTTTGCCGGCAGAGTCGGATGGGCGTTTCTGATTCAGTCAGAAACTGAGTTTCAT…	426	chr2	170573419	170573844	-	none	KLHL23	2.0259	18.2828	1.87303e-05	2.52985	0	6.03842	2.89748	0	0	2.26872	5.00254	0	55.8705	27.2194	10.3576	21.0753	27.9903	16.1956	26.1321	8.70274	3.78109	18.742	31.9927	8.35517	10.1091	15.723	0	10.2781
75416	GAGTTAGTGCAGTAAAGCTGATACTGCAGGGACAATACACATCACCAGCCCAAGCTCTGCCACAACCCCAACAGGATACCTCCACTCATCAATACTGTTTGTCAGGGGGGCATACAGCCATAACTGAGACTATTCAGAAGTTAGAGGAGGTGCAAATAGTGCATGGCACCCATAGCCCCTACAATTCCCTGGTATGGCCAGTCAGAAAGCCTGATGGAACTGGGCGAATACCAGTGGATTATCGGGAACTGAATAAAGTAACACCCTCTCAGCATGCAGCTGTACCCTCCATCATGGATTTGATGAACCGCTTGACAACGGAACTGGGACAGTACTACTCTGTGATGAATGTGAATAATGCATTCTTCTCCACTGACATTGCTCCAGAGAGCCACGAAC…	1044	chr2	170570809	170571852	-	none	KLHL23	14.257	57.3214	4.3805e-05	1.80841	5.87273	14.4922	17.3849	3.44711	16.7496	21.931	21.6777	12.5011	139.203	65.0242	24.8581	81.9593	53.6481	76.9291	64.4592	39.1623	27.4129	89.3002	92.3219	31.7497	33.36	62.8919	7.88295	26.9801
6094	TTCCAGCTCCCTGCCCCACATCCACCCACTCCCTCAGCCCTCAGTTGGGCTGGAACCTGACACTGAACACGACAAAGGCTGACCCCCAAATGGTTTTAAATTACAGTAAAACAAAAACCTCCTTCTAAAGGCCTTAAAAATTGGATAATGACTTAGTTTCATTCAAAGGATAGATTTTAAAAGCCCCTTATAGCCATAGCCAGACCTAGAGACCACTCAAATCCATAATGATACTGGAATTATAGAATTTTAGAACTGGAAAGTATTTAGGGGGATAAAAATCCATTAATCTAGTCATTTTACAGAAAATAAAATGAGTTCCAGAAAAGTGAAAT	335	chr2	170567874	170568208	-	none	KLHL23	7.14403	25.8186	0.00063905	1.6609	5.87273	13.2845	7.72662	0	6.17091	4.53744	16.6751	2.88486	53.9765	30.9999	24.8581	30.442	17.494	28.3423	32.2296	16.6802	11.3433	44.0989	41.1335	15.8748	20.2182	19.9158	2.36488	23.1258
111459	GCTGGTGTTCACAGGATTGAATTATTTTAAAAAGGCACCCTCTTCATCTCTAACCAGTCACAGAATCCTGCTTCTGTATCAAGTGGAAGAAGAATGTCAGGTTAATAGTTCTTTTAAAGTTGGTAGTATTTTTTTTAACATCTTATTTTACTTTTAAAAACTGCTTGAATTAGTGCCATGTAAAATACCTTCAAAAACAGTTAAAAATATTTGGCAAACATAAAATGCAAGTGAAGATATCATTTATATGTATATTTTCCATAACACAGGTGAATAAAGTCTACTCTGGAATTTAATTCCCTTATAAATCCTGCCTTTTGTAAAGCACAACACTAATAAAATCTATTTTAAAAAAATTAACCACATTGTCATAAATATACATATACCAAAACATAGATC…	441	chr14	37905060	37905500	-	none	MIPOL1	1.8526	35.7552	6.59172e-06	2.99756	2.93637	8.45379	0	0	1.76312	0	1.66751	0	143.937	30.9999	21.7509	40.9797	8.16385	176.802	15.6793	2.17568	26.4676	30.8692	11.883	16.7103	10.1091	3.1446	1.57659	30.8344
17297	GATTGAATCACGTGCTATACTTTACTGTAGTCCCGTTCTCTTTATATTTTACTTATAAACTAAAGTTACAGAGTAATTATCAAAACTCCATATTTGTGTTCTGAAATTGGCAGAATTTGAATTTGCAGTCCATAGGTCAGCAGATTTCTCTGACTTTCCTTATTTTCTTTGCTTAGCCACAGAAAAACAGAAAAATCAGTGAGTTTACATGCACAGAATTAAATGTACAGACTATTCTCTGAAAGAGCTCAGTTCTATGTGAAAATGAATAATGTAATAAATATTCTTATGAGTGTAGTAATAGTAGCTATTGTTTATTGAGTACTTCTTATGTGCATGGCACTTTATACTGCATGCTTTATGTCATTTGAGCCTAACAAAATACTATCATTATTATTA…	435	chr7	38351573	38352007	-	none	none	11.5027	305.483	3.86484e-13	3.89905	5.87273	6.03842	8.69244	3.44711	17.6312	7.5624	40.8541	1.92324	256.625	54.4388	89.075	132.306	206.429	276.675	211.67	223.37	96.4179	1375.88	925.961	332.536	309.338	156.182	107.208	133.616
59559	AAAAAAGAAACAACTTTTTTCAGTGAGCTAACTGAAATAGAAGAGAATGGCGACTCCTACCCACACCTCTTGGATCCTGGACATCAGCTCTGGCTGTGGGGCAAATGGCACTGCATATTGGCCAATGTGGGGAGGATGCAGCCAACTTAAGGCCCCTTTTCAGGGAGGGAACGCTGACCCCACGCTCCTATTTCCCAGCTGCCTGCTGATGTTTCCATTTTCTACCCCCAAACAACACCTGCAGGATAGGGAAGACCATCCATGCAGCCCAGGGCGGTCAGACTTTTAAGGCAGAGTTATGTGGAAAATGGACTTGGATGAGCCAAGGAGGAAATCCTGCAGATGGCCCAATAAGTGGATTATGTTTGACTTCAGATAAGTAGGACAAGCTAGGGAGCC…	1028	chr7	38351978	38353002	-	none	none	23.6956	423.707	1.36268e-11	3.51218	13.2136	8.45379	26.0773	11.2031	48.4857	15.881	63.3655	2.88486	354.162	78.6339	163.649	202.557	337.05	291.521	316.199	345.934	158.806	1819.08	1199.27	483.765	444.8	252.616	165.542	165.735
2837	AAAAAAAAAAAAAAACGAAGAGTGTATATTTTTCCTGAAGCATGAAAATAATCTCAAATTCTCCTAAACCACGCATATGCAGAATTATGGGCTGGCTGACTTTCCTGCCAACCCCAAAGTTTGAATTTTTTTCATGATTTAACTGTCAGACTATGAAACCTAAGATGTTTCTCACCAACTCAGCAGATACTTGAAAGACTTTTTTTTTTTTTTTTTTTTTTTT	223	chr10	115992065	115992287	+	none	none	1.03142	76.1213	1.83407e-11	4.25046	0	0	2.89748	0	1.76312	0	1.66751	1.92324	107.006	69.5607	55.9308	5.85424	144.617	161.956	162.89	6.52705	107.761	4.40989	14.6253	97.7555	15.1636	129.977	1.57659	132.331
51949	AAAAAAAGGGCACAGACTTTGAAATGCTTATCTCCAGACATTGCGCTCATGAGTATTTTTATCTGTGTCATTTCTGTACTTTTGAAATGGTCTAATAGAAAACACATTACTTTTTAATTTTATTTTAAAATTGACTTAAAAAAAGAATTCCTGTTTTATAATATTAAACATATCCCTGCACATTATTGAGCACCTAGAGACAATATGTAAAATGTGTTGGTTAGAAGGACCTGGAAGGGGCTCTGCTTGACTACTTTTTCTTTCCTCTTCTCTAACAACGTTTGCTTCTTGTAAAAAGCAAAATCTTACCTTTTCTCCTGTTTCCTACTGATCACTGTGCTGAGCTAAAGAAAATGTTAGTGATTTGAATGCTCAAGGCAGCTTATTGGGCTTGTATGT…	478	chr7	38352973	38353450	-	none	none	8.68887	206.545	2.25257e-11	3.70685	2.93637	7.24611	7.72662	0	12.3418	3.02496	33.3503	2.88486	181.816	47.634	70.4314	94.8387	139.952	156.557	169.859	184.208	58.6069	921.666	584.096	228.932	189.04	126.832	89.8656	60.3839
91686	GATTACAGGCATGAGCCACCACGCCTGGCCCATATACACATCTTTATATATCCAGGGCTTAGTGCTACGTCTATCATAGTGTGGCTATTACATTTTATAGAGAGAATAGCTAAGTATGAAGAAACTCTTACAAGAGGTTATCCCAGATTAATTTAATTCTAAGCTTTTGGTCATGGTTCCCTAAGACCTTTGACTCACACACAGCTGGACAGGACAGTGGCCTTGTGCATAGTGCAGATGACCATTATAGGGGAAAAACAAGTCGAAATTCATAGTCCTTTACTCCTCCTGCCCTTCTCCTTTTGCTTAAGGTGAGCTTCACCAGGAACATTTTCGCCACACCAAAGGAAAACTAGCCAGAGGCAAACCAGCTCTAAGTTAATATTTGCCAATTAAATG…	930	chr7	38353444	38354373	-	none	none	17.2489	338.927	2.06233e-10	3.51077	7.34091	3.62305	11.5899	6.03245	32.6176	9.83112	65.033	1.92324	259.466	65.7802	119.112	111.231	255.412	255.081	234.318	262.533	103.035	1436.52	1016.46	407.733	387.178	249.471	138.74	120.768
99861	GACAAAGCACAATCAAAGCAATGGCTACCAAGAGGTGGAGTGGTCCAGTCAAAGCAAAAGCAGACCAGTCAAAAGCAAGGGTCATGGCAACAGTGTTTTGGGATGCCCAAGGCACTTTGTTTGCTGACTTGCTGGAAGGCCAAAAAACGATCACATCTGCTTATTATGAGAGTGTTCTGAGAAAGTTAGCCAGAGCTTTAGTAGAAAAATGCCTGGGAAAGCTCCACCAAAGAGTCCTTCTCTACCATGACAATGCTCCTGCTCATTCATCTCATCAAACAAGAGGAAATTTGTGACAGTTTCAATGGGAAATCAATAGGCATCCACCTTATAGTCCTGATTTGGCTCCTTTTAACCTGTTTTTGTTTCTTAGTCTTTTTTTAAAAAAATCTTTAAAGG…	695	chr4	106460226	106460920	-	none	none	7.34425	35.7469	2.67966e-10	2.15697	7.34091	9.66148	11.5899	4.30889	9.69714	7.5624	6.67005	1.92324	35.0374	24.9511	54.8951	39.8088	47.8168	37.7897	28.7453	29.0091	51.0448	36.3816	28.3364	48.46	41.4473	13.6266	17.3425	37.2582
107265	GGGATTACAGGCGTGAGCCACCGTGCCTGGTCATCCAACCATGAGCTTTTGATAGACTACTCTGAGCCAGGCATTATGCACAGCAGAAATTACAAGGCCCATACGCTCTGCAAAGGCCCGAGGTTGCTTCTGTTGAACCACATTCTGCTACTGGGCTGCCATTCACCACTAAAATGGCAGTCCTCAACTTGAATATAACTCATGATTGTAAGTCTCTTATGAATTTTCGTTACTTCTAGTTCAACTCAGGCTTTGCAATTTATTATTGTTGATGGTGTTGTTTTAATTTATGTTTTTGCCATGAAACCCTTTCTTGAAATGTGATCTTACAAATATAAAATAGAGAAAAGTAGATTTCCACTGGGAAAGAGTTCAGAGATGAATGATCCTTAGTCTCAT…	732	chr7	38355062	38355793	-	none	none	19.1382	413.528	3.38714e-10	3.56212	10.2773	9.66148	20.2824	4.30889	41.4332	7.5624	56.6955	2.88486	285.034	49.1462	90.1108	151.039	300.896	299.619	268.29	291.542	110.597	1964.6	1257.77	620.789	461.986	211.736	136.375	116.914
21606	TCAGCACTCTGTAAAAATGCACCAATCAGCACTTTCTGTCTAGCTAAAGGATTGTAAATGCACCAATTAGTGCTCTGGGTCTAGCTAAAGGACTGTAAATGCACCAATCAGCACTCTGTAAAAATGCACCAATCAGTGCTCTGTGTCTAGATAAAGGACTGTAAATTCACCAATCAGCACTTTGTAAAAACACACCAATCAGCGCTCTGTGTCTAGATAAAGGATTGTAAATGCACCAGTCAGCACTCTGTAAAAATGCACCAATCAGC	269	chrX	117605227	117605429	+	none	none	0.428829	31.9601	3.52374e-10	4.04407	0	0	0	0	1.76312	0	1.66751	0	2.84087	91.4875	17.6079	0	25.6578	49.9364	34.8428	63.8201	35.9204	11.0247	6.39855	55.1442	65.7091	13.6266	3.94147	33.4039
64163	GTAAGTTCTTTTTTTGCTCAGTTGTCTGGATTATTTCCCTAATCTTTCTTGTTGCCACTCTTGATGCCCACATGAGAGAATCTAAGGTAATTTCTGATAGCCTGAGACTGCTGAAGGAAAAACAGAAGGTGCCACAAACCCATTTTAGGAGAAACCTCTGTTTTCCTCATGGAACCCCAAGAACTTTAAGCAGACAGGTCCCTCTCAAAATCTAAGGCTCTCCTGTTTTGCCTTGCATTATCTGACCTTTTTGGTTTGAGTGGGCATCAGAAATTAGTAGAGGGAAGAGATCTAAAGAAAGTTGTGGATATGAAGATGTATTTATGGTAAGAAATATTATGAAGGAAAGAAATGTTATGTGAGAGAGGATCTTGTATGGCAAATTCTTG	389	chr9	97313157	97313545	-	none	none	0.860354	15.0616	4.35813e-10	3.31636	0	0	0	3.44711	0	1.51248	0	1.92324	16.0983	14.3658	21.7509	12.8793	3.49879	14.846	20.9057	12.3289	4.72637	11.0247	8.2267	29.2431	17.1855	18.8676	15.7659	19.2715
60955	AAAAAAAAAAAAAAGCTTTCAGCTAATATATGTGGTAGGCAGAGTAATGTGGCTCAATGCCCCCTCCAAAACATGTCCCATCCTAATCCCCACAGTTTGCAAATATGGCAAAGGAGAATTAAGGTTGCAGGTGAAATTGTTTGCTTATCAGCTGACCTTAAAATAGGGAGGTTATCTTGGTTTATCCACCTGGGTGCAGTGTAATCACAAGGGTCCTTACAAGTGGAAGAGGAAGACAAAAGAGAAAACCAGAGAGATCGCAGCATGAAAAGGACTCAGCCTGATGTTGCTGGCTTTGAAGATGTTGGACAAGGCCACAAACTAAGAATTCAGACAGCCTCTGGAATCTGGAAAAGGCAAAGAAATGGATTCTTCCCTAGAGCCTCCAGAAGGAACACA…	697	chr13	52609916	52610612	-	none	none	1.57459	18.0719	1.13092e-09	3.02882	0	3.62305	1.93165	0	2.64467	1.51248	0	2.88486	36.9313	17.3902	8.28605	14.0502	8.16385	28.3423	14.8082	17.4055	17.9602	36.3816	20.1097	17.5459	11.12	6.28919	8.67124	25.6953
63866	TGAAGGTATTATAGTCTACTAAAATACTTTAAAACAAAGAAACAATGGTATTTTTGAGTAAGTTAGAATAGCACCAGTTGTGTGTGCTTTACAAACAAAAGAAACAAGGAAAAAAGAGGAAAAAGGAAAAAAAATCATTATATTTGAACTAGAGAGCAAACATGACAGTTTAGAATATGAAGATGAAAAATAATTTGGAACCCAATTAGAAAACTTCAGACAGAAAGAGCAGAAACTTTGTCCTTTGAAACACAGATGCATAAGAGACCGTGTCAATCAACTCAAGGACCTGGCATAGAAGTCATTTTCCTTGGGAACTGTATTTACCATATTTGAGAAATTGAAAAATTATACTCCCTGAGAATTCTAAATTGCTTTATTTATCTCCCCAAGGTCAGA…	490	chr4	95591040	95591529	-	none	none	0.301921	26.5513	1.14609e-09	4.02641	0	2.41537	0	0	0	0	0	0	160.036	21.9267	30.0369	29.2712	12.8289	75.5795	11.3239	5.0766	17.9602	5.51236	4.57039	10.0262	13.1418	11.5302	3.15318	12.8476
89419	AAAAAAATAACAGCAAGCACACATATATAGTCATGTGTCCCTTAACGACAGGAAAACATCCTGAGAAATGCATCCTTTGGCAATGTCCTTGTTGTGCAGATATTGTAGAGTGCCCTTAACACACACCTACATGGTACAGCCTACTACATACCTAGGATATATGGTATAGCTTATTGCTCCTAAGCTGCAAACCTGCATAGCATGTTGCTGTACTGAATGCTATATGCGATTGTAACACTGATAAATATTTGTGTATTTAAACATAGCATAGAAAAGGTACAGTAAAAATAGAATATAAAAAAAATGCTACACATGTGTAGGGCAGTTTCATTATAATTTGTCC	343	chr7	38354726	38355068	-	none	none	10.6488	226.034	2.48785e-09	3.47148	0	3.62305	14.4874	2.58533	24.6836	4.53744	33.3503	1.92324	141.097	27.9755	54.8951	72.5926	169.108	151.159	160.277	192.911	102.09	999.941	699.27	340.056	272.946	79.6631	78.0412	74.5163
62736	CACACACACACGCAGCTGTGGCTCTGGGGTCCCTGATGGCACCACGCAAAGTACCAGAAGTACACGGGCACCGCACCTCGAGGTTTCCCAGGTAGGAAGGACAGGGATGCCTCTGTGGAATTGTGAAGGAAGAAACCCAACCCTTGGTGGGGGCCGTCCCGGAGCTCTCCCTGCTGGAGGGGGAGCCTCGGGCCCTCGGAAAAGGACACTTAGAGCTAATACCCACAGGCCGTATGTGGGATAGTTAGTATGAAGCTGGAAGCTCTGTTGGAATGGAAAAGTACCGGGCAGGTGCTCACTAGAGTGGTCAGGAGCATCGGCGGTGACCGCAGATTGGGACACCTCCTATGTCTTTCCCTTCTGGCGCGGGGAGAAGAAATTCCTGGTCCAGGTATTGGG…	579	chr21	38068512	38069090	-	none	none	0.771363	26.8358	4.10168e-09	3.65337	0	0	0	0	6.17091	0	0	0	8.52261	10.5853	14.5006	5.85424	9.33011	49.9364	21.7768	22.4821	18.9055	46.3038	95.0641	51.8021	7.07637	14.6748	6.30636	46.2515
96641	TTTTTGTCTTTGGTTCTGTTTATATGCTGGCTTACATTTATTGATTTGTGTATATTGGACCAGCCTTGCATCCCAGGGATGAAGCCCACCTGATCATGGTGGATAAGCTTTTTGATGTGTTGCTGGATTCAGTTTGCCAGTATTTTCTTCAGCATTTTTACATCGATGTTCATCAGGGATATTGGTCTAAAATTCCCTTTTTTTGTTGTGTCTCTGCCAG	220	chr7	152816377	152816596	+	none	none	1.12316	40.0383	6.10882e-09	3.6563	0	0	1.93165	0	0	0	4.16878	2.88486	3.78783	75.6095	29.0012	0	36.1542	52.6357	46.1667	64.5453	54.8258	15.4346	13.7112	51.8021	134.451	9.43379	5.51806	47.5363
2815	CAGAAATAGAAAAATTAGTCCTAAAATCTGTATGGAACCGCAAAAGATGCTGAAAAACCAAAGCAATCTTGAGCAAAAAGAACAAACCTGGAGGCATCAGACTACCTGATCTTTGATAAAGCAAACAAAACAAAGTGGGGAAAGGATACCCTATTCAACATATGGTCCTGGGATAATTGGCAAGCCACATGCAGAAAAATGAAACGGTTCTTCAAAAGGTTAAATATAGAATTACCACGTGACTCAGTAAATTCACTCCTATGTATACCTCAAAAAGAAATTAAAACAAGGTGCCTACACAAAAAGTAGCATACAGGTATTTATAGCAACAAAAAGTAGGAAACAACAGAAATGTCCATCATTAATGAAATGTGGCCTGTCCATAAAATATTGACAATG…	424	chr9	97310763	97311186	-	none	none	0.460795	11.8862	7.45565e-09	3.4577	0	0	0	0	1.76312	0	0	1.92324	10.4165	9.82923	25.8939	16.3919	3.49879	6.74817	10.4528	17.4055	13.2338	0	10.0549	16.7103	11.12	20.964	11.0361	6.42382
15281	TGCACTGGCTCTTGCATGCAGGTCATTGTCCAGGTCATGGCACACACGTGTTCTCTGCTCCCACACACCCTGAGCAGCAGGCTGAAATGCCCTCTGCAGTAACCGCTTCACTCTCTGCAGCAAAGCTGCTGCCCAGGTGTTTCCCCTTTGCAAATCTCCAGAGGGAGGAAGGAGTCAGGCATTGCCCTCTGTGACCTCCAAATAGCAGGGTCCATATATTGGATGCTTTGAGTGGTCCCCTTACACATCCTCTTTCTTGACCTAAAATGCAGGGAATACAGCCCACACCCTGCTCATGGGAAGACACCCCCAAAGCCTCAGCAGCTCCTGCTAAGACCCTTTCTTAACGAGCTTCTTCCTAGTCTCACATCCCAGATTCTTTCACGCCCTTGATGAAGG…	576	chr20	56337238	56337813	-	none	none	0.360608	22.2922	8.30156e-09	3.7743	0	0	0	0	0	0	0	2.88486	89.9609	42.3413	9.3218	8.19593	6.99758	29.6919	79.2674	2.17568	25.5224	6.61483	11.883	5.0131	14.1527	14.6748	3.15318	7.70859
92273	ATCGGGTTTGTTCCCATGATAAAAGATGCTTGGCTAAAGTCTAGTCTATTTTAGGTAATAGTCACCAAGCTTTACTCAACAATTTTGAATTCTTTGCTGTAAACTGGAAGTATTCACTGTGATAAGTATACATATCTGCAACACTTTCAGCTGATTTTAGTCCCTAATTCTAGACCTTACCCATTTTACACACACTATTAGCTAAATCGTGTTCCTGAGGCATGGCTCTGATTACTTTACTCTGGCTTTAGCCTTGGCCTCATCCGTTAAATTGAAACTGTTCACCAGACCTGTATGCAT	300	chr13	52608329	52608628	-	none	none	1.18227	16.147	8.62782e-09	3.05432	0	0	0	0	5.28935	0	4.16878	0	34.0904	18.1463	18.6436	15.221	11.6626	24.2934	13.0661	16.6802	16.0696	13.2297	17.3675	24.23	4.04364	5.241	7.09465	19.2715
33500	AATTTATGTAACTACTTGTCTCGAGTTAGAATTAGGTATTCTCATTTTTTTCTTTATTACAGATAATAAGTCATTGAACATCCTCGCACATAAATCTTTGTGTACAAGATCTTCTCTCACCTTTCCACAGACAAGACAGATGTCTTCTAGAAAACTAAAATATGATTCCAGAAACATTAATTTGTTAGTTCAGTGATATTTTATAAATTACTTGTTC	217	chr4	106456654	106456870	-	none	none	4.45885	23.4771	1.19323e-08	2.20118	4.40455	2.41537	6.76079	1.72356	5.28935	6.80616	2.50127	5.76973	21.78	12.8536	24.8581	15.221	51.3156	21.5941	27.0032	15.2298	22.6866	28.6643	26.5083	20.8879	42.4582	14.6748	15.7659	14.1324
98092	TGCGATCCATCCCCAGCGGAAGCCGACTCGGGAGAGATCAAGGGAAGAACTCCGGCCGTTCCCCGCGGGATGGGAGAGGCTATTGCAGTGGCAGCAGGAGATCAGAGACCTTGTCACTAAGGAGGTGGGGGAGGGGGAAGAATTTCCAACCTCTGAAGTGGAGTTTAAGAACTTCCACTGCCCCAGCAAGCAGAGGCAACAGAAAATCCAGGACTGCGTTGATTCAAGCCTATTTGGTTTATACGCTCTTGTCTACATCCGCAATCAGTTATGATATGGTTACTCCAGAAAAGTCCGCTTGGCCCAGCATCACATATATGACCTTTTCATGGCTGGGAGGATTTTTGGTCTGGGCTATCTGAAAGAATTCCTCGATTTTTCACTCCTTTCCATGTGTAA…	569	chr21	38067692	38068260	-	none	none	0.330584	16.3236	1.84084e-08	3.64567	0	0	0	0	2.64467	0	0	0	3.78783	3.02438	5.17878	8.19593	6.99758	28.3423	21.7768	13.7793	5.67164	25.3568	47.5321	37.5983	4.04364	13.6266	1.57659	34.6886
60432	CTCTATCTCACTCACTAATTTCTTTGTTTTTTTTCTTATTTATAACTTTATCAGTATTTTGAATTATTATACTTATTTATTTACTTACTTGTTGATCATGCCTCTATTCCACTGTAATGCAACTTCCATGACAGCATGATCTTTTTTGTCTTGTTTACCATTATTTCTCTAGGGTCAGTCTACCACTACTTTTATTGTCTTGGCAGAATTAGGTGTCTCCTGAGGTGATGCAAAAAGAAAAGACATTATCAGTGATGGCTTCTAACCAAGGATTCAAGGCTTCTGATTTAAATTCTATATTATAGCCATCACAGGGGTGAAGGCACAAAGTAAATGACACCAGAAAGAGGATTTAACACAAAATCCGAAACTTGGGATATTTCACAGGATAAATTGCTG…	871	chr4	106458492	106459362	-	none	none	2.04283	14.9569	2.05303e-08	2.55093	2.93637	2.41537	2.89748	0	2.64467	3.7812	1.66751	0	8.52261	9.07314	16.5721	22.2461	18.6602	13.4963	8.7107	14.5046	14.1791	18.742	12.7971	19.2169	23.2509	7.33739	6.30636	25.6953
57223	GGGCAGATTTCCCCCTTGCTGTTCTCATGATAGTGAGCTCTCATGTGATCTTCTTGTTTAAAAGTGTGTGGGACCTCCCCCTGCTCTCTCTTCCTCCTTCTCCAGGCATGTAAGAAGTGCCTGCCTCCCCTTCACCTTCCACCATGATTCCTAAGGCGTCTCCAGTCATGCTTCCTGTACAACCTGCAGAACTGAGTCAATTAAACTTCTTTTTTTAAAATAAATTACCCAGTCTTGGGTAGTTCTTTATAGCAATGCAAGAACGGACTAATACACCCACCTCTACAAAAGAAAAAA	297	chr20	56336731	56337027	-	none	none	0	14.2124	2.22582e-08	3.87048	0	0	0	0	0	0	0	0	87.12	21.1707	5.17878	3.51254	4.66505	14.846	27.0032	1.45046	16.0696	2.20494	13.7112	2.50655	13.1418	5.241	3.15318	6.42382
58423	CTTACAGCTTCCTAAGATAAAACATGTAAAATACTTACCACAATCTTCAACAAATTTGAAGTAGCACAGTATAACAGGAAAGCAAAGGTTTTGAAGTCATCACACAGGTCTGGGTTCAAACACCAGTACCAGCCACACTTCTGTGGAATTTACTTAACTTTCCTGAGCTTCAGCTACAAAGCACTCAATGCCTAGCACATACAAGTTACTCAGTAAGTGTAATTTCTGCTGTTTATACCATTTTAATAAAATCTTCATATAAGGCAATATTTTAAC	276	chr9	97290081	97290356	-	none	none	0.362185	9.49768	2.23513e-08	3.41227	0	0	2.89748	0	0	0	0	0	5.68174	6.80485	15.5363	10.5376	3.49879	6.74817	13.9371	9.42796	4.72637	8.81977	7.31263	11.6972	11.12	22.0122	10.2478	3.85429
97370	AAACTTACAATCATGGTGGAAGGCAAAGGGAGAGCTGGCACTTCACATGGCCAGAGCAGGAGGAAGAGAGTGGTGAGAAGGTGCTACACACTTTTAAACAACCACATCTCATGAGAACGAACTCACGTCATGAGAACAGCACTGAGTGGAATGGTGTTAAACCATTCACGAGAAACCACCTCCATGATCCAATCACCACCCACCAGGCTCCACCTCCAACACTGGGGTTTACAATTCAACATGAGATTTGGATAGGGACACAGATCCAAACAATATCAGGTACAATGCTTCTTTTGTTTTATAGATGGGGATGACTAAGTCAGGGAGTTTGAATAATTTGTCCAACATCATAAATACTAGGTGATGATGTCACAATTAGTACACAGGTATAAAAGTTCC…	988	chr4	106457319	106458306	-	none	none	5.94683	26.5582	2.49427e-08	2.00613	5.87273	6.03842	7.72662	2.58533	6.17091	10.5874	6.67005	1.92324	24.6209	19.6585	20.7151	19.9044	44.318	28.3423	39.1982	25.383	33.0846	47.4063	26.5083	24.23	24.2618	10.482	14.9776	21.841
102836	ACATGAAAACAATCACATTTCTTTGTTTTAATCTTCCTTTTCTTTCATCCTAGTCATTTCTGTAGAAACAGAGGCTGAAATGACTGGGTAGCATTATGGAGGATTTCTGGTAATAATAACACCTACACAGTGTGCTGCAGGAAATAGCGAGTCCATACCCGATAATTATGACGTGATGAATCATAGAAGAATTTAGGAGCATTGAGACTGAGTGTTGAAGATTTACATTCCAAATATATTTTTATTGCACCTATAACATAACTTACGGATTCAAGGAGAAAAATGTCAAAGACCTACGTTTTATACATGCACATGTACACATTTATGTCTGTCTACATAGATCTAGACATGCACAAATGTGGGGTAAGCAAGGAGCAGGAAGTGGACATGGAGGATGAG…	787	chr4	123622308	123623095	+	none	none	2.74624	23.0261	3.51475e-08	2.65676	2.93637	0	0	6.03245	4.40779	0	6.67005	1.92324	35.0374	29.4877	39.3587	24.5878	32.6554	32.3912	35.7139	11.6036	36.8657	13.2297	14.6253	15.0393	20.2182	6.28919	11.0361	10.2781
65730	CTACAACCTTGCCAGCATCTGTTATTTTTTTTTGACTTTTTAATAATAGCCATTCTGACTAGTGTGAGATGGTATCTCACTGTGGTTTTGATTTGCATTTATCTAATAATTAGTGATGTTGAACATTTTCATATGCTTGTTGGCCACGTGTATGTTTTCTTTTGAACAGTGTCTGTTAATCAAGCTAAATGTCCATTAACGGTAGATTGGATAAAGAAAATGTTGTGCATATACACCATGGAACATTACGCAACCATAAAAAAGGACGAGGTTGTGTCCTTTGCAGCAACATGGATGGACCTGGAGGCCATAATCCTACGAGAACTAACACAGGAACAGAAAAGCAAATACCGTGTGTTCTCACTTATAAGTGGGAGCTAAACATTGAGTATACACAGA…	498	chr21	42924148	42924645	-	none	none	0	14.1439	4.43407e-08	3.8113	0	0	0	0	0	0	0	0	1.89391	2.26828	12.4291	7.02509	5.83132	12.1467	5.22642	15.955	24.5771	31.9717	31.0787	18.3814	48.5236	0	0	8.99335
100310	AGCAGTACTCTTTTGTTTCTCAGGTCGATCAGCTACAGTGTGGCAAATACAAAGCAAAAAAAAAAAATTCACTTCTGTGAATTGTGCTGTGATGAACACACCATGCATGCGTCTTTACAGTAGAACAATGAATATTCCTTTGGGTATATGCCCAATAATAGGATTGCTGGGTCGAACGGTAATTCTGCTTTAAGTTCTTTGAGAAATTGCCAAACTGCTTTCCACAATGGCTGAACTAA	239	chr21	42924663	42924901	-	none	none	0.220389	19.1222	5.49587e-08	3.67922	0	0	0	0	1.76312	0	0	0	17.9922	6.04876	12.4291	4.68339	5.83132	9.44743	9.58177	19.5812	14.1791	34.1766	47.5321	32.5852	82.8946	0	0	8.99335
43954	ATCAGCAGTTTACAAATGGATAACTTGTTTTAGGAAAGGATGAGATGCTGAAGATAAATCCTGCAGTGGCAAATTCATCCACATCAATTTGTAAGGAAAAAATTTATCTTCTTCATGCCCTAACTAACCAACATTTAATAGCTTGGACAATAGCCAACACCACAGACATCTCAATTAGTTCAGCTTACACAATCCTGACTAAAAAATCAAAGTTGAGCACCTTCCACTCAATTGGTGCCAAAACCATGGCACCCAGATCAACTGCAGACAAGAGTGGAGCTTTCCATGAATATTTTAAACAACTGGGATCAAGATCCTGTAGCATTTCTCAAAGAATAGTAACAAGAGATGAAACATAGCTTTACCAGTATGATCCTGAAGACAAAGCACAATCAAAGC…	401	chr4	106460900	106461300	-	none	none	5.97807	29.6391	5.5551e-08	2.0922	0	7.24611	11.5899	3.44711	3.52623	9.83112	8.33757	3.84649	28.4087	18.9024	31.0727	35.1254	39.653	48.5868	24.39	20.3064	43.4826	31.9717	14.6253	21.7235	44.48	13.6266	14.1893	43.682
69744	CAAATTGATCATTCTGTAAATGGTAGCAATAAGTGTATCAACACTTTGACCTCCTCTGTGTCTAGTAACATTTGCATATAGTACAACTGAGCACATAGCACCAGAATATTGGAACAGATGCTTCTCCAAAGCCAAGGGTTGCCTTACATTTAGAGTGGGAAAAGAGGAAAATGAGTTAGCAGAGGAGCAGCGGGGAGGGGGGTAAATTACAGGACATAATTTGCTTCTAAAAATTTGTGTTTCGTGTTGTAGTTATATAATTAACTTTTCTATTGTACTGATTGACAGATTTGGCACAGAC	301	chr13	52607973	52608273	-	none	none	1.59041	17.5103	5.67583e-08	2.86943	0	3.62305	0	0	4.40779	3.02496	1.66751	0	48.2948	22.6828	10.3576	9.36678	4.66505	24.2934	12.195	6.52705	15.1244	17.6395	31.9927	24.23	13.1418	9.43379	7.09465	23.1258
68680	ATACCAGCTCAAGTGGATGGTCATGCTTGATCAGGAAATAGAAAAACAAGTTTCAGGGCTAAGACTAGCACAAGGAGCAAACAGTTTAAGATATAAAAGAAACAGGGTTTGATACAGGAGCAAGAGGCCAGAGGCAAAACAGGTAATCCAGGGTTAATGCATTGAAATTGTAGAAATAAACTTAAAAGAGAACAAACAATAACAACAGCAACGAAAACGGGTTGCTGTGTGTTACTGTTTGAATATGTCTCCCATGTTGGAAATTTAATTCCCAAAGTCATATCTTGATTAGATATGAAGACTTTGGGAGATAAGTTGGATCAGATAAGGTCATCATGATGGGACTGGTGGATTTATAAGAAGAAAAAGAGATCTGGGCTGACACAAATGCCCTTGCCC…	472	chr11	4722181	4722652	+	none	none	0	28.9968	5.86229e-08	3.82152	0	0	0	0	0	0	0	0	124.051	65.7802	34.1799	19.9044	11.6626	79.6284	22.6478	7.25228	13.2338	2.20494	4.57039	17.5459	53.5782	0	0	7.70859
94042	GACCAGATACAAAGTCCTCCCACCTATAATCCAAACGCCAGACCCTGTGTCATGGTCAAAACCTTGACCTTCGTTTAACATGAAGGTTTGCCCCTTGCCAGCTCCAGGCTTGCTGCAGATGGGGAGTCTGTCCATTCGGAAGGAGGTTCCCTCCTGGCTCTGCCCTGTCTGTTGGCTTATCTGCTCTCCCCACAACTCTCTCACCTGGCTTTGACCCTCCGGAGTCTGGATGCAGTCGGAGAGGTAAGAGGCCCAAGAAGTCCTTACTTGCCTGGTGACACAGCCTCATGGACTCTCCCTGGTGGGCACTTTGGAGACACCCACCTCCAATTGCTAAGCCTCTTCTCTGAGGTTCCCTCGTAGAGAGTAAAGTTATCTTCATTCTAGCCAGAGATTTCT…	471	chr20	56337858	56338328	-	none	none	0.18906	19.7901	6.42042e-08	3.69002	0	0	0	0	0	1.51248	0	0	118.37	36.2926	6.21454	9.36678	0	20.2445	41.8114	2.90091	20.796	3.30741	9.14078	3.34207	19.2073	6.28919	3.94147	15.4172
86515	TGGCCATTTTGTCTAATAGTTTCAATAGTTTCCAATAGTTTCAAGTGTATAGGTTGAGGGCAGGGACTATATCTGGTCTTTATATCTTACAATGATTTTCTTATATAGTTATTAGCACAGTGCCAGAAATGTTTCCTGAATTAATAAATGCTAAAACATTTCCTCATTAAGACTGTAAGCTGTTTGGTGTAGGAAAACTAACTTTTTAAAATTGATCATAACAATTCCAACGTTGAACATGGCCTGGAGCTTAACAGATGTTTATTTAAATACTAAGGAGTATGTCTGGGCTTAGGAAGGAGAGGGTGGTTACATTTCAGGGTGGTAGAATTCTGCCTGAAATATCTGCTTTATAATAAAAGTAAAATGTCTCACCGATACACTGTTAAACTGAGAAAA…	524	chr13	52609391	52609914	-	none	none	0.18906	10.6566	6.60949e-08	3.54395	0	0	0	0	0	1.51248	0	0	30.3026	14.3658	8.28605	4.68339	2.33253	8.0978	20.9057	10.1532	11.3433	16.5371	18.2816	7.51966	5.05455	0	2.36488	10.2781
8520	GCCCTGAGAGGCAGCCAGACACTGGGAACTAGCTCTGGACACAGGCCTGGAGGCTCCCACTCAGCTGGCCTCATTGTTTCCATGTTTCCAAGTTGAAGGGTCGGGGCAGGAATGGAATGCCTCCAAGGGCTGTCTGTGGTGTGAGCCTGGCGGCCAGGGAGCCGGGACGCTGAAGTGTAACTGAGTCTGGGATGTAAGGGACAGAAAGCTGTCAGAAAAGTGCTCTGAGCCTCGAAACGAACCTCCCCTTGGTGCCACCTCCGGGGAGTCACCCCGCCCAGCAAGGCCCCAGGAGGGGTGCGGGGTAGCAGGAGGTGGGTGGGGGGCCCTCAGCCTCGGTTTCCTGGCCTGTGAAATCGGCAGCACTGTTTATCTCCCTAGAGGCTGGTATTAGGCTGG…	1044	chr4	1202761	1203804	-	none	none	1.21528	21.9123	6.67198e-08	3.18901	0	0	1.93165	0	5.28935	0	2.50127	0	43.56	6.04876	29.0012	30.442	0	13.4963	30.4875	10.1532	19.8507	28.6643	7.31263	27.5721	61.6655	8.38559	13.401	20.5562
119995	TTTTTTTTTTTTTTTTTTTTTTTTGCTTTTACTGGCAATGTACGTTGTCTAATCTGTTAAATGGGATATTTCCTCATGTAAAAAGTTGTTAAAACACTGATGTGCTTCTGTTAGATAAAAGCTCACGCTGCTTTGCCCAATAAAATTATTTCACTTCCCAACCAGCTTTCTCTTGTTTTCTTACTGCAGGCATTTTTGCCAATTTCCTTTTTTTTCTTGTACATACTGGGAGAATTAGAGGCTTAATGTGTTCATACTGTCTGCTTTATTGTTTGTAACCACAGAGGAAATACAAGAATATGCAATCACACAATTGCCGTTTTATTAAGGAAAATTAGGGAAACAAATCAAGGAACACAGAAAAATCAGGAGTCATTGTTTGGCTTCAAATTG	393	chr10	115992265	115992657	+	none	none	1.67713	76.6485	6.81489e-08	3.59403	0	0	3.86331	0	7.05246	0	2.50127	0	127.839	57.4632	56.9666	4.68339	157.446	184.9	171.601	4.35137	105.871	4.40989	7.31263	87.7293	9.09818	92.2415	1.57659	152.887
108184	TCACAATTGGGGCTGGGTTCCAAGGGAAAACAGTCTGAGATAGGGAAGCCACATGGTATCCCTTTCACTACATTCTACTCATTAGAAGGAAGTCAGTAAGGCTGGCCCATATTCTGCTTTTTAAATGGGATGAATGTAGCTTCTCTTTTGTTTTAATTGACACATATATACATAATTATGGGCTATAGAGTGATATTTTTATACATGTATATAGTGTGTAATGATCAAGCTAACTAGCACATTTACTACTTCAACCAT	258	GL000214.1	56285	56542	-	none	none	0.528103	15.6107	6.85473e-08	3.38425	0	0	0	1.72356	0	0	2.50127	0	4.73478	12.0975	48.6805	49.1756	3.49879	16.1956	15.6793	3.62614	8.50746	15.4346	21.9379	5.0131	2.02182	26.205	11.8244	5.13906
118896	TTGAGTTTGAATCCTTCATTCTTGTCGATACTCCCCAAGGGCCTGGCATTGTGCAAGCATGTAAGAGACGATGGGGCCTTATTTAGAAAATTAGTAGTTGTTGAATTCTCACCTTCCCAAACCCCTCAGCTTTTTTAGAGAAAATTAAATTTGACAATACACTTTTGTATCTCCTATTACTGTTGACTTTCCCAACATCTATATGACATGCACAGGACCATAATACCCAACAGGAAATAAGTTCTTAATTTGTTGAATAAATGAGTAGATCATGTAGTACATTTCACAATAGACAATAAGGGCCTACAATTTTGAATCACACCAAAGATCACACTGCTGATTAACAACCCAGCAGAACTAAAAGCCCTGCATCTTCAGGACTGATTTAGTGTTTTTTCT…	986	chr8	128033487	128034472	+	none	none	2.19331	19.1179	8.76289e-08	2.66932	0	3.62305	1.93165	5.17067	0	2.26872	1.66751	2.88486	14.2044	16.6341	19.6794	7.02509	11.6626	12.1467	15.6793	24.6578	14.1791	29.7667	13.7112	48.46	33.36	25.1568	1.57659	17.9867
89623	CTCTGTGTGTCTGGAATTTGAACTGAGACCCTAAGTTGGGACCACTCAGAAGTCTGGGAGACTCAAGAGTGAGGTGGCCATTACAGAGCCACACACAGCACAAGGTATTAAGTCAGGAGAAACTGAGGCAGCCAGACAGACGGGGAAGGGAGCAGGGCACAGAAAAAACCAATGAGGAGAGATACCCAGGGGAGAGGCCAGAGCTGCCTGATCAAGGACGATGCCCACCTCCAGGACAG	239	chr15	69867369	69867607	+	none	none	0.665341	11.0221	8.88499e-08	3.09723	0	0	1.93165	1.72356	0	0	1.66751	0	13.2574	13.6097	12.4291	11.7085	26.8241	4.0489	13.0661	1.45046	17.9602	7.7173	7.31263	5.84862	4.04364	11.5302	16.5542	8.99335
80338	AAATGACCGGGAAAGGAGAATTCAGCTCCTAGCCTGAGCTAAGCACTTTGATAGGAACATCTCAGGTCATCTGTACAGCAGACTCACAAGGTGGACGGCGTAATTGTCTCTGGTTTACAAAGAAAAAAAAAGATTTGGAAAGGTCACGTGAGTTGGTAAAGGCCACAGAGCTAATAAATTGCAGTCGTTTTATTACAAGCACTCAGGTTCCTAAAATTACACGATTTTGTCTTTCGGATGCGAAGCTTCCAATGAACTCTGCAATTCTATCCGTGTTTCGGATATCAAAGTTTTAATTCAATGTACACGTTGTTGCTCTACATTTGGTAAAATGAAGAGAGTACCCGACTCAAGGTCAG	359	chr2	1629692	1630050	+	none	none	0	11.4729	1.13302e-07	3.70187	0	0	0	0	0	0	0	0	36.9313	8.31704	6.21454	0	12.8289	18.8949	12.195	5.0766	10.398	17.6395	19.1956	6.68414	6.06546	0	0	23.1258
85893	ATCCAGTTTTTTGTGACTATTTCCTGATGTTTGACAGACTGTTCTTTCAACTTGGTGTAGAGTTACAGTCTACTCTTTTAGGGAGAATGCTGTTTGTTCACATCATGAGGCTGTAAATATTTAAAATGTTCTCACCATTGTGTTAGTTTCCAACTGACACATGGCCTGAGAGATTGGAGTATCATTAATTCTGCAACTCTTTTAGTGCTC	210	chr13	52609194	52609403	-	none	none	0.18906	10.7131	1.37036e-07	3.48273	0	0	0	0	0	1.51248	0	0	31.2496	6.80485	9.3218	14.0502	0	21.5941	19.1635	6.52705	17.9602	12.1272	6.39855	9.19069	2.02182	3.1446	1.57659	10.2781
9446	TTTCTAAAGCTAACTGATAAAATCATTTATCTAGTTCAGTGAATAAGTGTGGTAGAAGTTAAAACAGAAAAAAATGCTATTATTTCTAAAATAATTTCCCCTTGGACTGCATTTGCTAAATTAGCAAGTGATTAAATTAATCCTAGTTTGTATTATTTGCTGAAATGTGTGTGTTTCCTGGCATAGCCTAAGAAGAAAATGTATCTACACTCTCATTTTGTAGAACTCTGAGAGGACCATCCAGTCATTGCTGACAAAGCCCAGTCCTACATATCATCATAGTACATGAGGGGCATGTACAGTTAATGTGAAAAATAAGCTCAATTGTCCTGATATGTTGCAGTCCAAAACTTCATTTATGAGTCATTTATTTAGAACTCAGAACACTCTTGCC	394	chr4	123626617	123627010	+	none	none	0.741487	12.3053	1.3719e-07	3.07085	0	0	0	0	1.76312	0	4.16878	0	10.4165	17.3902	15.5363	11.7085	18.6602	20.2445	14.8082	8.70274	29.3035	2.20494	10.0549	5.0131	18.1964	4.1928	7.88295	2.56953
8385	GATTAGCAGCTAAAGAGGTGGATGGGTAGAAGAAAAAGCAGAGGTTTTCAAAGAACAAAAATACAACAAGGCAGCACATCCGTCCCCGAGGTTGAGAAATGTGGGCTGCACTAGTTTCCGCATCATCAGAACTGTGCCCGAGTCAGCACAGTTCTGAGCACAGGGAGAATGTAGAGCACGTGGGGCAGGGAGGCAGGGTGCATGTACCTACGAAGTGCTGCCCCCACACACATCCCTTAAAGGAGAGTTACCCTAGAAATGATCTGAG	268	chr15	69866405	69866672	+	none	none	0.37812	9.96805	1.49673e-07	3.23848	0	0	0	0	0	3.02496	0	0	20.8331	9.07314	6.21454	2.3417	15.1614	10.7971	20.0346	2.90091	17.0149	5.51236	9.14078	5.84862	3.03273	13.6266	10.2478	7.70859
70408	ATTCGCCAGGTGATGGGACCTTTGGGTTCTCTCCCACCCAAAGGTGACAGACGTTCTGGTTCTTTCCACCTTTTGACTACTATTAATAATGCTGCTGTAAACATTTATGTATGAGTTTTTGTGCTTGTGTATGTTTTTATTTTTCTGGAGTATATACTTATGACTGGAATTTCTGTGTCATATGGTAACTTTATGCTTAACCCTTTAAGGAGCTGCCAGTTTGTTTTCCAAAGTGGCTGCATCACTTTACATTCCCAGCAGCATTAG	267	GL000214.1	58838	59104	-	none	none	0.759001	25.2159	1.53833e-07	3.41924	0	0	0	4.30889	1.76312	0	0	0	6.6287	11.3414	94.2538	119.426	8.16385	24.2934	6.96856	2.17568	11.3433	18.742	37.4772	13.3683	5.05455	27.2532	11.8244	5.13906
51956	GTTTCTCCTGTAGAAAATCTTGGTTGATAATTTGTCCTTTTGCTACTTCTAGGCTTCCCAGGATATCCCAATTTCAGAGCACTTTTTATGTTAATTTCTCACTTAGAGGTTGGCAAACCTCACATATATTACCTATTTCAATTATAAGCCCCCAAATTTATGTGAGGGGAGGCATGGTTACAAACTCATAGGGAAGACATTTTCCTCTTTACTTAGAGCCCAAGCCAAGACATTCATTTATGCAATAAAAGCTTACTAAGTTACTGTGCTAAAGACTAGGGATGTCATAAGAAACAGGCAAAGTCTCTGCTCTCATGAAAGTTATATTTTGGAAGAATATCCTTGTGCTGATGGGGAAATTTTCTAGTCCTCCAGCAGGAATCTCAGTTTTCACTCCCT…	723	chr4	106459533	106460255	-	none	none	3.02641	19.936	1.88126e-07	2.36964	0	2.41537	3.86331	0	8.81558	3.02496	4.16878	1.92324	28.4087	8.31704	27.9654	12.8793	36.1542	28.3423	20.0346	10.8784	35.9204	19.8445	8.2267	22.559	19.2073	9.43379	10.2478	20.5562
58948	AGTAAGGGAGCACAGTCCATGTTCCGTCCATCCTGGCCAGCTTTCTTGGGCCTTGAGGGAACAGCTCACAGTGAATCCGGATTCTGTTGTCCTTTGCTGCCTGTTGGTGAGTAATAAACCCTCTTCACATAACTCGTTGTGTGTGTGGGTGCTCTGCCTCACTGGGCTCAGACAAGTTGGTAACCGGTGCGCAGTAAAACTGCTTCACAGTTGAGGATGTCCAAATTGGTGTTGGAGCTGGTGGAGCCCATGTTAGGTAATGAAGGAGGATGGAAGGAGATGGAAGTGTGATTTTGTTGTCGTTTATTTCTCCTCTATTAGACTCTAAGCTCTAAACTTTACAGCAGTGGAGAAGAGGGTCAGAAGCTTATAAGTTATGTAATTTGATGCTTAATAAAT…	612	chr4	123621616	123622227	+	none	none	2.76888	18.9595	2.18864e-07	2.44852	2.93637	3.62305	2.89748	1.72356	5.28935	1.51248	4.16878	0	30.3026	25.7072	21.7509	37.4671	26.8241	29.6919	20.9057	10.1532	26.4676	4.40989	19.1956	6.68414	15.1636	5.241	11.8244	11.5629
59396	CTGGAGACCAGCATTTTTATCATCATAATGGGGATTTGCTTCAAGAGTGGACATGTTGCTTAACCCCCATGTAACTGGAATAGGAGCAAAGAGATCTGGAGAGAGAGAGCATGGTGAGGTCCAAGGACCACTCTGTTCTTAATTTGTCAGTCTCTATTAGAAGATGGATCCTATATGTGCCTGCTGACCTAACACTTTGCTGAAAAATGAGAATTAGGGCTAGTCTTGGACAATGTCTGCAGGGTAGGCTATGTGTATATTGGAAAAGAGGATGCTGGCTAAGAGGCACATGCATTGCAGGCTAAATGCCATCAACTGGGCCTGCCTGGAATAGAAGGCCAAGCCTGGCAAAGGAGAGCCAGTGCCTAAGGAATCTTCACCCAAATAAACCCTTTATTC…	464	chr4	123623442	123623905	+	none	none	0.868764	12.2033	2.34409e-07	3.02686	2.93637	0	0	0	0	1.51248	2.50127	0	12.3104	23.4389	17.6079	10.5376	11.6626	21.5941	20.0346	2.17568	21.7413	0	9.14078	8.35517	13.1418	7.33739	11.0361	5.13906
45621	AGATAAGACAAGGCAGAAAAGACATAGCATGGTGCCAAGTACAGCAAACATCCTTAGCAAATATTAATTATTGTCAACTTCTAAATATGTAAAAGTGGTTCCTGTGCAGCCTGTTCCTGTCCCATCTCTTCAAGGGGCCCCTGAAGTCTAAAACATAACCAAGCTGGTTTGAATCAACAAGACTCAAGATTCAAGATATTTCCTTAAACAGAAACCTCTCCCACACAG	228	chr20	56332841	56333068	-	none	none	0.501719	13.7754	2.52761e-07	3.28454	0	0	0	0	0	1.51248	2.50127	0	21.78	36.2926	3.10727	2.3417	4.66505	14.846	50.5221	5.0766	19.8507	3.30741	12.7971	3.34207	9.09818	18.8676	5.51806	8.99335
94949	ACTGCAATGTGGGGATTGTTTGTTACTGCTGCGTAACCCAGCCTGACAGATACACCCTGATGTTCACTTGATATAGGTCCCTCTGGATGCTGTTTAAAGGAAAGATTGAAAGGTGGCAGGATCAGTTAGGAGGATGTTACAGACATTCAGGCAAGACCAGGGTAGAGGCAGTTAGGATCTAGAAAAGTGCATTGATTTAAGGACCATCAATAGGTAGAATTAATAGGATTTGGGGGTGTATTGATTGTGGGATGACTGGAATTGGTTTCTAGCTTAAACACCATGAAGGCAATGGAGGGGACCATTCACCAAGAAAGAGAACTTGAGAGTAGACACCGTTCTGGGAGCTTAGAGAATGTGACAGGCAGAATAATGCCCCTCAAAGATGCCTACACCTCA…	450	chr20	56335291	56335740	-	none	none	0.96061	20.9143	3.49089e-07	3.22633	2.93637	0	0	1.72356	0	3.02496	0	0	79.5444	42.3413	14.5006	8.19593	3.49879	13.4963	71.4278	5.0766	25.5224	12.1272	12.7971	1.67103	15.1636	7.33739	3.94147	17.9867
41779	TATTTACAGTTATAGAACATTTTTCCTCTGAACATTCTGAGCAGTTTTATATTAAAACTTACTTGTTATTGTTTAATGGAACCATTTATTTTAGTGATAGGAATAAAGAATGTGGCAGGAAAGGATCTGGAGTCAGAGGACAGAGAAAGAAAAATGGAAAACTCTTTTGTGCCTCATTCTTTTGCTCTTGCTATTCCTTTATTTCAGAATACTTGTCCCTGCCTTGTCTACCTAAATAACTTTTATTCGGTCTCCTAAATTTACATTCAGCTATAATGTCATTTCTCCATGTGTATGTAGTGGTTCTAAATGGG	314	chr4	106456339	106456652	-	none	none	2.40156	13.9792	3.60713e-07	2.28003	0	6.03842	3.86331	0	2.64467	3.7812	0	2.88486	5.68174	12.8536	15.5363	10.5376	27.9903	9.44743	14.8082	9.42796	14.1791	23.1519	14.6253	17.5459	19.2073	9.43379	10.2478	8.99335
77541	TGTGTACACATTCTGTGATATTATTCATAACATCCTAGGGAGATGCTACTCCTAGTTTTACAAGGTGCATACGTTATGTGTGTACACCCCCTCTGATGTTATTCATAATATTCTAGGGGAATGTTGCTGCCAATGTCACAGGGAGAGTACGCCATGTGTATGCAACCCTGGTAATATTATTTCTAATATCTTGGGGGGATGTTGCTCCTAATGTCACCTGGAGTGTACACCATGTATGTACACCTTCTGTGATATTATTCATAAATCACAGAAAAA	276	chr12	52504833	52505108	-	none	none	16.3637	59.5057	7.10174e-07	1.76826	24.9591	22.946	10.6241	14.6502	16.7496	10.5874	15.0076	15.3859	48.2948	94.5119	72.5029	39.8088	58.3132	40.489	101.044	77.5994	66.1691	46.3038	78.6107	80.2097	17.1855	18.8676	29.9552	82.2249
17415	GCTTCCAGCCATGAACTAGGTTACAACCTCAGCTTTCCTGGTTCTGTGAACTTCAGACTTGGACTGAGCCAAGTCTCCAGCTTGCAGATGGCCTGTTGTGGAACTTTTCAGCCTCCATAATTGTGTGAGCCCATCCTACTGATAAGGCTCCTTCCTCTATCTATACACATATCCTATTGGTTCTGTCTCTCTGGAGAACCTTGACTAAAATAGATTTGATATTAAGGAAGCCAAATGTCATTCCTCCTTACTTTATTACTTGCAGCATAATGGGAGAGATCTGTGAAACTGTTCCCTCACAAAAGGCTATGATGGTCTAAGCATATGAGGCCTCTTAACAGTGAAAGATAAAACTTTAAAAGCTAATTACTATTGGCATTTTGAAAGCAGAAAATCACT…	651	chr4	123633246	123633896	+	none	none	2.81259	17.5171	7.25373e-07	2.34913	4.40455	2.41537	1.93165	3.44711	1.76312	3.02496	1.66751	3.84649	21.78	22.6828	21.7509	24.5878	19.8265	33.7408	23.5189	9.42796	34.0298	2.20494	15.5393	6.68414	14.1527	6.28919	18.9191	5.13906
89196	AATTGAGTTATCAACTAAGCTGATTCCTGAGGCACAGATCATCCTGTCCTCCACAACATGATTAAAGACTACATGATGCTCAGGAAGACCTCTGCAGCTGTGTGCTTGGAAGAGTGTGTTTTTCCTGCTAAAGCATAAGAAAAAAGAGACCAGCAATTATCTTAGGCCTTGCAGCATCCTTTCTGGTCCCACAAGTTTGAGAAGGCAGGTGTGTGTGTGTGTGTGCATTTGTGTTTGTGTGTGTGCGCACGTCCACATGCATGCATGATCCTACAA	276	JH591181.2	682440	682715	+	none	none	5.30763	22.4823	7.25682e-07	1.9238	4.40455	8.45379	0	5.17067	6.17091	4.53744	10.8388	2.88486	27.4618	23.4389	15.5363	35.1254	8.16385	25.643	32.2296	10.8784	34.0298	13.2297	25.5942	17.5459	31.3382	22.0122	22.0723	15.4172
55557	GCATCATGGCCAACCAAGAAGAGGTCTGTAAGTCTGCCCTTCCTCCCTCATCCCCACTTGAAATTAGGAAAAGAGGAGGAGAAAAATGGATACAGAACAGATCTTTTCAGGCAGAACTACCCTGAGTTAGAGGAAGAAGAAGACAAACTTTCAATGAGTTTGAGGACAGGACTGAATATTATATAGGAGAATTAGAATGTTTTAATAACCAAAACGGG	218	chr4	123623894	123624111	+	none	none	1.83176	12.7316	8.97195e-07	2.48865	5.87273	0	1.93165	2.58533	1.76312	0	2.50127	0	18.9391	18.9024	15.5363	18.7336	11.6626	17.5452	21.7768	6.52705	21.7413	2.20494	7.31263	6.68414	12.1309	7.33739	10.2478	6.42382
36621	CTTTTGTTTTTCAAACATGTATCTAATTGATTAAAATACAAAGACATGGTTCTCCTTTAAGAAACAAGTAGGGAGCATTTCTTATATTTACATTTGACCTATAGTTTACAAACCAAAGACTAAAGTTAAAATACTGTAAGTCCATTAAACTCCTAATGGATATGTTTATTCCCCAACCCCTGCCACTAAAATTTATTGCGATTTGTCTTATGATTATAAAGTGAGAAGCGTTCATTATAG	240	chr4	106457078	106457317	-	none	none	2.85941	16.6102	9.75961e-07	2.22689	0	4.83074	2.89748	0	2.64467	3.7812	5.8363	2.88486	15.1513	12.8536	22.7866	29.2712	26.8241	17.5452	22.6478	5.0766	10.398	28.6643	13.7112	15.0393	19.2073	4.1928	13.401	8.99335
46122	GGGTGCAGGACTTGGGTAGATAAACCATGAGGGAGACTCTATACTGTAGGCTCTCTCTTAGGAGGAGGGAACCACAGATACTTGATGTGTACTGATGACAGATTCTGCTAGCATATAGATCTGTGAGCATTCAACTGTGCTTCATTGTTCAGAGGCAGTAAAGTGGCTTCCAAAGTCATGCAGTTAATCAATGTGCATAGGCCAGGGCTAAGGGGAGAAAACACAATGGAAGAAATGGGTGATTTCTCTAAAGAAATGAAAGTGTACCCATGCTCTGTAAAGTGGAGATTCAGGTGTTGGGCCCCACCCTCAAATAATGAGGTCAGGTGCCTCATTTTATGAGGTTAAACTCTGTTATGTCTCTCCCCACAATCTCAGTCCTCTTCTACCTTCCTGTCC…	577	chr11	4700562	4701138	-	none	none	0.521098	11.5026	1.24362e-06	3.08742	0	0	0	0	0	0	4.16878	0	25.5678	14.3658	5.17878	11.7085	5.83132	21.5941	25.261	5.80182	10.398	6.61483	10.9689	1.67103	20.2182	0	4.72977	14.1324
110726	AGAGCCGTCTGGAGCACTGGGTCCGCACCAGGCCCTGCAGGAGGCACCAGGAATGCAAAATCAATACGCTCTCCAAAGTCGATATACAGACAGCCAACAAGCACAGGAAGAGATGCTCAGCATCATTAGCCATTAGGGAAATGCAAATCAAAACCACCATGAGATACCACCTCACACCCGCTAGAACAGCTAGGATCTTTTTTTAGAGGACAATACCAAGTATTGGTGAGGAAATGGAGAAATTGGAATTCGCTACATTGCTGGTGGAAATAGAAAATGGTTCGGCCACTGTGGAAAACAGTTTAGTGATTCCTCAAAAAGTTAAATATAGAATCACTATATGATCTAGCAATTCCACTCCTGGGTATAGGCTCAAAAGAATGAAGGCAAGTACTCAAA…	529	chr20	56328021	56328549	-	none	none	0.93176	16.1068	1.44966e-06	3.0211	0	2.41537	0	0	3.52623	1.51248	0	0	33.1435	20.4146	6.21454	2.3417	16.3277	14.846	67.9435	8.70274	18.9055	14.3321	8.2267	1.67103	29.3164	2.0964	5.51806	7.70859
73244	GTTCTTTCGTTAAGTTTGTATAAAATCAATTGATTGTAAAAGTGCAAGCTTATTTTTAGATTGTCAATTCTTAGCTTCTTTATGTCTATTCTTATGTCAAGGCCCAATCGAATTGAATGAGAAGTTTTTTTCAATCATGTTGCATATTACCAGTTGTCTTATGTCATAATAAAAATTAAATTTAGTGGAATATCTGTAACTTCACCTTTTGTGTCACAAAGGAGTCTCTGGCCAGCTTATACCTTACTTCGTCTAAGACATGATCAGACGCCAGGCTTACAAGACACATTTAATTTCTTTTTTTCTCCATTCAAGCCTTTAGTCTCTTTTCCATTGCCTCCCGCTATAGTTATATTTTCAGTAAGTTTTGGTCGCAGGATCTGCTGACATAGTCTAATA…	1183	GL000214.1	57045	58227	-	none	none	0.793074	20.7582	1.45716e-06	3.18017	0	0	2.89748	3.44711	0	0	0	0	3.78783	18.1463	58.0023	92.497	9.33011	28.3423	5.22642	0	17.0149	8.81977	27.4223	13.3683	3.03273	26.205	5.51806	15.4172
78730	CTCTCCCACACAGGATTGATGTGGGGCAGAAAAGTCGGGTTTGGCATCACACATACCAGGTGACCTGGGGTGAGCCATCTCATCTGTTTCCCAGCTTCCTTCAGTGACAATGACAAAGGTCCTCCCTCTCTCAGGGGACAGTGCAAGGATCAATGAGAGAAATACATGCAAATTACCTGGCACAAGGTAGGCGCTTCAGTAAAGAATTTCTCCCGAGCTTCCCTGCAAGAGTTATCTACTAGGATCTGGCCTTTTGGCAAACTCATCTAGGAAGTCACCAGGAAAATCCCCATGGAGGACACCAAGGTGTCTGCTCTCTAATCCAGCAGAGATAACCTTTGGCAGAAAGCCCCTTGACTCAGAGAAAGTTCCAGGCTTGTATGAAGATGGGATGTGGGT…	433	chr20	56332421	56332853	-	none	none	1.61882	21.5244	1.50545e-06	2.90352	0	7.24611	0	0	0	3.7812	0	1.92324	59.6583	43.0974	10.3576	4.68339	9.33011	24.2934	74.912	5.80182	24.5771	15.4346	20.1097	4.17759	17.1855	11.5302	10.2478	8.99335
53129	TTCAACAGGAGTTATTATCTATGAAAAAAGCACAACAGGAATGTGAAAAATTTGAGGAGGATAAAAAGATGTTGGAAGAAGAAATATTAAATCTTAAGACACATATGGAAAACAGTATGGTAGAACTTAGTAAACTACAAGAATATAAATCAGAGCTAGATGAAAGGGCAATGCAGGCAGTAGAAAAATTAGAAGAAATACATTTACAGG	210	GL000214.1	53526	53735	-	none	none	3.87651	60.3824	1.89883e-06	2.97607	0	4.83074	5.79496	6.03245	1.76312	2.26872	1.66751	8.65459	3.78783	21.9267	134.648	345.4	22.159	59.3839	13.0661	5.80182	13.2338	100.325	110.603	26.7366	3.03273	42.9762	38.6265	24.4105
71047	GAACAATAAAGAGAGATAACACATTTTGCTTTTATGAAAAAGCCGATGTTCCAAATTTGCTGACCTTCTCTGTAAATAAGAAGTGACTGTCAGTAGCCAGCAGATGTGTTTATAAAAATAACCCACTTGATCTGTCCCTGCAAGGTAAGAGTGGCATTTTCAAAGTGCATGAGAGAACTGCTCTCAAGAGAAAATCATACTGTAAAGACAGCATTTCAAAAACATTTATTTGGAAATATTTAAATGATGTGATCTATTTATTTATTTGGTCAAAAATGCCCAACTTGCCTAACATTATTTTATTCCTTAAAACACAGATCAAGCAACAGATCCTACAGTTAGACTCTTCTGATCACCCTGAGAGTTAGTTACCCCTTTCTTTGGTTTCTTCTCTTTAAC…	790	chr8	128105939	128106728	+	none	none	1.18707	25.1239	1.98362e-06	3.07978	0	0	2.89748	2.58533	0	1.51248	2.50127	0	109.847	30.9999	33.1442	19.9044	20.9927	90.4254	11.3239	22.4821	12.2886	4.40989	0	16.7103	15.1636	6.28919	1.57659	6.42382
28118	TAATGAAATTAAGGCAGAAATAAATAAGTTCCTTAAAACCAATGAGAACAAAGAGACAACATACCAGAATCTCTAGGAGACAGGGCTTTGCTTTTGCTGCATTCTATTCGTTGTGAACACAAATTACAGGCCAGTCTCGATTCAGTGTAGAAGGGAACTGCATAAGGACCACATACCAGGAGGCATAATTCACTGGGAGCATCTTTAGAAACTACCAGAGTTACCTGTTGCCCATACCAGTGGGGTAAGCCCTATGAATGTATATGAGAGTTTCAAACATCCACAAAACATTGGCTTTCTAATATTCGTATTCCCACTATTCCTTTCTTTTCATGATTCATGTCATTGTCCCATCAACATTTCTAAGATTTCCATTCCGTTAAGAGCAAAAGAGAATGT…	918	chr1	169481339	169482256	-	none	none	1.51808	19.1651	2.18703e-06	2.81898	0	0	1.93165	2.58533	0	3.7812	0	3.84649	42.6131	34.0243	25.8939	7.02509	19.8265	48.5868	9.58177	1.45046	23.6318	36.3816	2.74223	4.17759	9.09818	19.9158	16.5542	5.13906
58734	GCTCCAGCGGGTGGCGAAGGGGGCCGTGGCCCAGAACAGAAACCCTTCTGGAGGTGGAAACCCGGATTCTAGTCCGCCTCTGTCCCCGCGACTTCTATGGCCTTGGGCAAGTCATTTCCCGGCCTCTTGGTTTTCCCATTTGCTCAGTGAACGGTTGGTCTGGCCTCCCGCAGGGGCTAGGCCCTCCCCAGCCTCCTGTCCCGGTTCCTGGGCTCCTGGTCATGCTGGGGAAGATGCAGGCCCTCACGGAGTTGGAGCCAAGGCTGAGGTGTGGAAAATCTGGGCGGGGGAAGCTGAGGGCCACCATGGAGCCTCAAATCCACTCCTCGGATCTCTGTGGTGCTGCTGACATCCTGAGATGTCACTCCCTGACACTCCCTTGGTCCCTCTTTCAGTCTA…	771	chr2	219865377	219866147	-	none	none	1.34812	18.0238	2.26832e-06	2.87633	0	3.62305	2.89748	0	1.76312	0	2.50127	0	68.1809	17.3902	11.3933	19.9044	0	29.6919	40.0692	6.52705	9.45273	16.5371	21.9379	6.68414	18.1964	13.6266	2.36488	6.42382
44560	CTGGACTTTGTGACTTACTTCTAACAAACAGAATATAGCAGAAGTAACTAGCACACAAAAGACATTTCAGCTTCTTCTGAGCCCTTTCTCTTAGATCACTGGCACTTGAGTAAGATACCGCCATCTTGTGAGGACACTCAAGCAGCCCTGCAGAGAGGGCCATGTGGCAAGGAATTGAGTCCTCTTGCCGACAGCCGTGTGAGTGGGCCATCTTGCAAGCAGATTCTGGCCTCAAATGATTACAATCCCAGCCCACATCTAGACTGCAACCACATGAGGTTTTAAGCCACTAAGCTTTAGGGAAATTTGTTAC	313	chr20	56331981	56332293	-	none	none	1.53426	19.368	2.56311e-06	2.81826	0	2.41537	2.89748	0	0	5.29368	1.66751	0	70.0748	44.6096	16.5721	10.5376	9.33011	25.643	44.4246	3.62614	16.0696	4.40989	11.883	5.84862	20.2182	16.7712	4.72977	5.13906
102499	AAAAAAAAAAAAAAAAAAAAAAAAGTAGGCCAAAGACTTCTGTGCCAATGTTCATAGCAGCATTATCCACAATAACCAAAAGGTGGAAATAACCCAAATGTCCATCAACAGATGAATGGATAAACAGAATGTGGTTTATATATACAGTGGAATATTATTCATTCTTAAAAATCTGGTACCTGCTACAACATGGATGAAACTTGAAAACATTATGCTAAATAAAATAAGCGAGATGATAAAAGGACAAATAATATATGATTCCACTCATATAAGGTATCTAGAATAGGCAAATTCATAAAGAAAGAAAGTAGAATACAG	318	chr11	4699927	4700242	-	none	none	2.23441	18.8257	2.66889e-06	2.53252	0	2.41537	2.89748	1.72356	0	0	10.8388	0	26.5148	13.6097	8.28605	22.2461	5.83132	44.5379	41.8114	7.25228	23.6318	20.947	11.883	10.0262	20.2182	8.38559	14.1893	21.841
107318	TTGTAAATGTCTTCATATTTTACCTAATGGTAGATATGTACAGGAACTCAATTAGGGAATCTAACCTGTGGGTCACCCTTCTGTTGTGTTACCTATCATCCCCTAAAGGAGATTTTAAAAAAAATTTCATTTTTCATGCATGTATGAAAGAACAAGTTCTTTTGAGAAGGGCATTCTTGTATAAGGGTCAAAACAGAATCAGATTTTATTAAAAAGCCAGCGTGTGTAAAATCAGATTTGAGGAATTACAATGTTTGACCTAAGGATGAGGAATTTTGTCAACCAAGAAAGTGTGGTTTTTATGGTCCTCACAAAAGTTTTCTAAGGGGTAGCTGGGATGATAGATGGATACCTTCTTTTTATTCCCTGTTCTAGCTGTTTTCTGCTTTGCCCTCACTG…	881	chr2	42663314	42664194	-	none	none	0	14.1516	2.99023e-06	3.38541	0	0	0	0	0	0	0	0	46.4009	10.5853	8.28605	11.7085	17.494	52.6357	16.5503	0	31.194	0	0	1.67103	2.02182	12.5784	6.30636	8.99335
84786	TATCCACTAAATTAGTATTAAATGGACAAGTAAACCAAACTCAGAGGGTTGAAATGAAGACTTGTAATACCCAGTGAAAAAAAATTATTGAAACTACCATCTAAAATTAATTGGAAGCTTAATATTACCTCTAGGAAAGAGTGTGGGAAATGAGGAAAGGCAAAAGGTAATGTGTTCATGTTTGTTCTGTTCCATAATCCAAGAAATAGATAAACACAGGCAAAAAAAAAAAAAAAAAAAAAAAA	245	chr5	69149573	69149817	+	none	none	9.65228	47.3023	3.0667e-06	2.05963	7.34091	4.83074	12.5558	17.2356	8.81558	9.83112	10.8388	5.76973	12.3104	43.0974	76.6459	21.0753	19.8265	45.8875	54.8774	26.8334	122.886	7.7173	28.3364	88.5648	50.5455	58.6991	62.2753	37.2582
43269	TATCAGAATTCCTGTGTTTGTAGGGTACAAATCTGTAAACTGTACTGCAAAGAGCCATGCATCTCTCTGTGAAGCTGTGTGTTTTTTGCATTCCATCTCTCCATTATAAAAGTCAAGTTCCAGTCAACTCTGCTGAAGGAAGGACTAAATTATTTTTGTATTCACTCTGGAAAATATTACCAAGTTGTTGAATAAAGAGAGGGTCAAAAAGTTTGTG	217	chr5	13995859	13996075	-	none	none	1.36654	14.8765	3.25232e-06	2.7197	0	0	1.93165	1.72356	1.76312	0	1.66751	3.84649	3.78783	14.3658	4.14302	7.02509	12.8289	9.44743	20.9057	55.1173	6.61691	12.1272	21.9379	41.7759	9.09818	5.241	11.0361	2.56953
119946	CAGGCATGAGCCACCGCGCCCGGCCGGAGCACTGCTTTTCTACTGTGAAGTTTTTATTTCCCATTCAGCTCAGCCTGAGAAACAAGCTTCTGACCCCAGTCTTAGTAACAAGCCAGGGCATGAGAGCAATGCAACTTCATCCCTGGACAGAAACTAAGCACCATGTAGTTTCCTATACCAACCCGTCACTATGTGCCAGGAAGTCTCTGACTTTGGGACTGGAAGACGTGGAGCTGTTTGAGTTTGGCCAAAATAGTTTCCCTCTCTGAGCTTCGGTTTCCCTATTTGTAAAATGAAAGGAATGAGCCCTACTCACCTCCTAAGGTGGCCGTGAGTTTTGAGCTGAGTGAATGGACGTGGAAGCACTTTGGAAATCATGAAGCACTTTTGAGTGAATGG…	908	chr9	110206452	110207359	-	none	none	4.0122	24.026	3.25969e-06	2.23022	0	3.62305	0	7.756	4.40779	6.04992	8.33757	1.92324	27.4618	18.9024	12.4291	5.85424	25.6578	20.2445	52.2642	13.7793	38.7562	26.4593	41.1335	35.9273	35.3818	9.43379	7.88295	12.8476
6400	GCCAGTGATCTGCTCAATCCCCGGGACCTCTTACCCCGTTTCTGGCCACTCTCCCAACACCATGCACCTGTAGAACTCCTACAGGACTTCCCATGGACAGCTGAAGCTGTTCCTACCAGACACGAAGGAAGCCAGGAGTGCTTGAAAGTTTATGTTCCCCTACCCTGGGGCAAGTTGTAGCCATTGATTGGCCAAGAGACCATGAACACCCAACTCCCCCAACTCCAAACAGAACTATTTCAGAGGCATAATTGATAC	258	chr20	56334235	56334492	-	none	none	1.01196	12.9701	3.50983e-06	2.84453	2.93637	0	0	1.72356	0	1.51248	0	1.92324	42.6131	25.7072	5.17878	2.3417	3.49879	21.5941	32.2296	4.35137	18.9055	5.51236	7.31263	2.50655	12.1309	4.1928	7.88295	11.5629
37200	TTGTTTGGGATGTCAGTGGGTGTGGAGGAAATGCCAGTAAATGTGTGTTGAAGGAATGAGGGAATAAATGAATGACGCATCACTAAGATGGTGATCCCTGGTCTGTGAAGCCGACTTGCTGCCTCACAGCCTCTATTTCTCAAGGTTACTTTTCTTTTATTGTTCTCAGGCCTAACATACGATTGTAGACTCAAACTCTTTGTGTCACTTTAGGAGCAGGTCCACCGTGGCAAAATGGTTCTAGGGCCTCGGCAAAAATAGGGACATCTCAATACTGTGG	280	chr2	39952748	39953027	+	none	none	0.56718	16.8698	3.80303e-06	3.11689	0	0	0	0	0	4.53744	0	0	46.4009	34.0243	38.323	8.19593	8.16385	45.8875	17.4214	13.7793	18.9055	2.20494	0	2.50655	3.03273	9.43379	2.36488	19.2715
68869	GATCCAAATAAGCTAAGTTAGAAATGAAACAGGAGATGTTACAACTGATACCACAGAAATACAAAAGATCATTCAAGGCTACTATGAATACCTTTATGCACACAAACTAGAAAACCTAGAGGAGATGGATAAATTCCTAGGAATATACAACTATTTTAGATTAAACCAGGAAGAAATAGAAATTCTGAACAGACCAATAACAAGCAGTGAGATAGAAATGGTAATAAAAAAATTGCCAACAAAAAAATTCCAGGACCAGATGGATGCATTCACAGCTGAATTCTATCAGACATTCAAAGAAGAATTGATATCAATCCTAT	320	chr5	13968989	13969308	-	none	none	1.58498	12.8312	3.86247e-06	2.49339	0	0	2.89748	2.58533	2.64467	0	1.66751	2.88486	7.57566	11.3414	6.21454	3.51254	12.8289	12.1467	12.195	23.9325	5.67164	8.81977	15.5393	39.2693	15.1636	2.0964	21.284	7.70859
109590	ATTGCACATTAAAATGCACCGACAAAATAAGAGATCTGTCATTCCTTCGTTAAGAAACAGTAATCCAGTACAAGATTTATAGGCTTAAGTCTCAACCGTGTGTTCACAATAAATCCCCATTCAGTGCTCAAACCAGAGCAAGCCTCCCTGTCGTTCAGTGTTTTCTAGTCGAAATGTCCCCAATATAAGATTATCAAAGGTTTTCTTACAGAACTACATATAAAATCCTTTTGCCAGCAAAAGCTTAATTTGGATTGGCGGTTTCCCTTTTTGGGTATGCTCAGACAAGATCTTGGTTATATCAGAAACACATAGGTACTGATGTATTATTAGCAGGCCTGGTGTTAATTAGGGAGAATTACCAGAAATAGTTTGCTTCGTGGAAATTTATTGCAGAAT…	977	chr4	95590035	95591011	+	none	none	8.51923	44.9249	4.04142e-06	2.13888	5.87273	18.1153	6.76079	8.61778	6.17091	12.0998	6.67005	3.84649	124.998	49.9023	26.9297	48.0048	13.9952	89.0758	67.9435	20.3064	22.6866	16.5371	10.9689	23.3945	37.4036	97.4825	37.0499	32.1191
22938	GCCTTGTCTGCAGAAATTTTTTATTCCTTTTTCTGTTAGCAACCAGCACTCAAACGTTAAATTTGGTAGTTGATGTACTTTGTAACAAATGAGTGTGTGCAAGTAGTGATTAAAAATAAGATTCATTCTCAAGGCACAAATGTCAGAGGGGAAGAGAGTATCTCAAAAAACAAACTAACACAGAGTATGCAAAAAGATTACTGGGAGGCTTTAGAAGTATGCAATTGAATGGCCAGTATTGCATTCTAGGACATTAGACACTTCAACTGTGTCTACTGAAGAAAGAGAACAGTTTTCCAGTTAGTAGCATAGGTTAATAGGAGCTATCACCTGCTGTTGGTTTGAATGTGATGGGCACAGCTGAGGGAAAAGGGACCCCATGCCCCCAATATTGAGTGC…	418	chr9	79122334	79122751	+	none	none	1.8095	15.391	4.57573e-06	2.53589	0	3.62305	0	0	1.76312	4.53744	1.66751	2.88486	60.6052	23.4389	13.4648	7.02509	9.33011	13.4963	22.6478	10.8784	13.2338	9.92224	24.6801	15.8748	7.07637	6.28919	3.15318	5.13906
34502	GACTCAAAAATGGTGATTCCAGACCTCAAGAAATAAGAACTTGAATTTCAGAGAAATCTTCCCTTATTATCCCTGAGGTCCACTCCATAGCTTGATCAAAGAAGTGGGATACTATGTAGTAGACTAGTGTGGCAGCACCTTAAACCCACAAATAAGTTTGGCTGTTGTAAAGAGAAGGGAAACCAAAATTATTTCAGGACCTACTATGTGCAGAGTTTTTATCTGCTATATACATAGGCATATGCTATTCCATCAGTGGTTCAGAGGGCATAAACAGTTAATAAAGCTATCTCAGGGATGATTAAATTGAGAGTTGCTCAGGGTCATACAATTTTTGAGTCAGGAATTAAACCCAGGGCTATTTCATTCCAAGGCCCATGTTACTTTCTGGTAAAAC	397	chr8	128075691	128076087	+	none	none	1.36826	13.7038	4.74026e-06	2.65006	0	2.41537	1.93165	2.58533	0	1.51248	2.50127	0	18.9391	16.6341	26.9297	3.51254	9.33011	14.846	16.5503	19.5812	3.78109	2.20494	5.48447	41.7759	23.2509	9.43379	3.15318	3.85429
109032	CAATGGAAACACCACGCTGAAACTATTGATTAAGATGTGAAATTTCCAAAATATTACAGAAAAACTTCAACTTTTTTGTACTTCCAGAGGAATCTGTATGAGCATAATTATTGAGTAGAGTAGCCAGATAGAACCTGATTAGCTATTACACTTTAATTTTTAAAATACACATTCCAGAAGAAAATTACTCTGAACTTTATTTCTTTATTCCAGTCGGAGGAAAATTAAGACTTTTTTTATACTCTTCAGTCGAAATAGACAATTATACAGGTATATGAACATTGGCATATAGTCTGTTCTACTTGTTCATTAAAAATATCCTACATAAGCTTAACTCTCAAAATAATTGAGTTTCCTTTAATATATGTGACAGAAGAGGTAAATAATATATGATTTTAA…	452	chr2	193333904	193334355	+	none	none	0.656224	13.2142	5.46069e-06	2.97693	0	0	0	1.72356	3.52623	0	0	0	22.727	6.04876	30.0369	3.51254	0	16.1956	8.7107	0	12.2886	9.92224	12.7971	15.8748	2.02182	34.5906	21.284	15.4172
40523	CCTGACAATTTTAGCCTCCTTAATTGAATGAAACGGAGAGCAGAGGAATCCATGGAGCTTTTCAAGTATGAACTTTGAAATATAAGTTAAATTAATTCCAGCTTAATTAACTGGAACTTACCATTCATTCTGCTTTGCTAAATTACTATGCTACTGCTTAGTGATTTTTCTAATACCATTATAAATGCTTTGAATTCTCCTGCCCCTAGAAAAGATAAATTGATCTGAATCTCTTATAGTTTGTTTGTGCCTGTATCTGGGAAGTTCTGGATGACCTTTGACTGTATCAACGTAGATTATAATCGAGAATATAAATTACAGCTGAGGGGGAAAAGTGGTTACTCCTGGTAGATCAATCTGGATGCAATCAGGAGGACAGAAAT	383	chr4	95591720	95592102	+	none	none	5.03698	35.9765	5.47174e-06	2.41621	8.8091	7.24611	5.79496	1.72356	2.64467	9.07488	5.00254	0	145.831	34.0243	34.1799	26.9295	23.3253	78.2787	31.3585	10.8784	43.4826	19.8445	10.9689	9.19069	30.3273	38.7834	8.67124	29.5496
113773	TCTGGACATTTCATATAAATGGAATCATATGATATGTGGCTGGCCTTTTGTGTCTGGCTTCTTTCACCTAGTGTCATGTTTTCAAAGTTCATCCATGTTGTAGCATGTATCAGTACATCATTCCTTTTTACGACTGAATAATATTTCCTTGTATGGGTAGATTGCATTTTATTTATCCATGCATCAGTTGATGGACACTTGTTTCTACTTTTTGACTGTTATGTATAATGCTGCTATGACATTCATGTACAAATTATCATGTG	263	chr2	42663059	42663321	-	none	none	0	11.7457	5.55773e-06	3.30633	0	0	0	0	0	0	0	0	35.9844	9.82923	10.3576	16.3919	26.8241	41.8386	8.7107	0	18.9055	2.20494	0	3.34207	0	2.0964	6.30636	5.13906
85204	AAAAAAAAAAGGAAGTCACTGTGGATGTCAAAGAACACACAGGCTTTCCACAACTGGAATCACAGACAATTTGGAGCTTGATGGGCTCCACTGCAATAGACTTGAAACTTCATTTGTGTCATTTGGTCCCAGCAAATGGAACCTGGCTTTTCTGGGAAAGAATTCCAGCTGCCAGTTTGAATCCACTGAGTAGTTCTATCCAGTGCCAATTATAATCTTGAAAGATGCAGTCCCCAAATCCCCAAAATCACAACTACAAAAGATTAAAATCCTGAATGCTGAATTCTGGGACAGGATTAGTGTGTTTTCATTGCATGCTGGATAGTTGTATCATGTTAGTTGTATCAAGTTAGTCAAAACGATTACCTTGCTGTCTTTATTTGGAAATTAAATGTGGTT…	700	chr4	123632520	123633219	+	none	none	2.53034	14.2881	6.61706e-06	2.17805	4.40455	0	1.93165	2.58533	3.52623	5.29368	2.50127	0	15.1513	29.4877	16.5721	21.0753	19.8265	17.5452	15.6793	5.0766	18.9055	2.20494	16.4534	10.0262	14.1527	10.482	13.401	2.56953
111193	GTGTTTGATCCTGTTGGGCCTCAGTAAGACATTCTTAAAGATGGAAATCCATGAAAAACGTGTAGCTAGTAACTGATAAAACTTGGATCCACTCTTTTGCTAGGACATACTCAGAAATTGAGAGCAAAATTTTCAACCAGCTCTCGACTGAAATGTGTGGGTTAGGTTAAGATTTAGGAATTCATCCTCTCCATTGATATTGCCATAAATGGTAGTCATAACTCTTTTGCAGATAAAAAATGTGGTTATATATTTCATTTATTAGGTG	268	chr5	13947609	13947876	-	none	none	0.79243	11.1227	6.6949e-06	2.81989	0	0	1.93165	0	4.40779	0	0	0	9.46957	6.04876	5.17878	2.3417	12.8289	8.0978	2.61321	24.6578	7.56219	9.92224	15.5393	41.7759	14.1527	2.0964	11.8244	3.85429
55249	AATTTATGAAGGTTTTAAACATAGGTAAAAAGTTGTTTACCTGGGTCCTTTGGACAAATTTCTCTTCTTCTTTTATCCTTTTGCAAAGAGAACAAAGATCAGCAAATACTAGCAGCCTAAAGCTACACTATGTGTGGCTTTGCATGCCTACCAATCTTTAGTGTTCCCTTGACTCCTGAAAACAATGGATTCTATCATATCATGGATATTAAGAGGCACATTAACGCTTTCTTGTGGAAACAGATGTTTGGTGG	254	chr4	106455994	106456247	-	none	none	3.90857	16.3616	7.87813e-06	1.82419	0	2.41537	7.72662	4.30889	4.40779	9.07488	3.33503	0	12.3104	22.6828	12.4291	14.0502	13.9952	16.1956	22.6478	10.1532	24.5771	33.0741	9.14078	16.7103	12.1309	12.5784	14.9776	14.1324
14584	CCCTAAGCAAAGGGGGACTTGGGTTCCATGGTTGGAGGAGAGGTTTTCTCCTTCTCCCCTTAGAGAGGAACAAGAACGCCTGCTGCTGCTGGCAGCATCTTATGATGTGAGGGATGCCAGCTTGAGAACAAAGCCAACGCATGAAGCAGGGCAGAGCCGAGAGACTTGCAGCTAAAATGGAACCAGAGCCTCTATCGCAGCAGGACTGAAGCC	213	chr20	56331370	56331582	-	none	none	0.362185	10.2736	7.91877e-06	3.06142	0	0	2.89748	0	0	0	0	0	22.727	18.9024	4.14302	0	0	17.5452	36.585	5.0766	16.0696	2.20494	10.0549	2.50655	11.12	6.28919	4.72977	6.42382
101348	TTGTCAATCACGCCTACCAGGGCACCCCGAAATGCAAAACGCACTAAGTTCAGGGACTTCCTCCTCTTCCTCTTGCTGCTGAAAAGGCCATTGGTTGTCTGCGACGTGGACCCAATCCACCCATTGTCCCATAGCGAGCATCAGAGATATCCAGGTGTGGCGAAGGTCGCTTTTGTGTCTGTCGTTCGTTGGCTGTTACCAGCTCTCATTAGCCCTTGGGTTTGGACAGAAGCGAATGTTTAGTTCCCCTGGAGAGAGGGAGGGGTATGGTGTGCAGAGAAAGCCCCGCTGGGTGGGTTCTTTCTGTCTCTTACATTTGCCTCGGTGCGCATCGGAGCAGGTGCAGCTGGAAACACACGCTATACATTTACATCA	375	chr5	14011147	14011521	-	none	none	2.22785	15.0057	8.23679e-06	2.34326	0	3.62305	2.89748	3.44711	1.76312	0	4.16878	1.92324	12.3104	13.6097	7.25029	3.51254	6.99758	12.1467	13.0661	39.8875	5.67164	11.0247	24.6801	40.1048	18.1964	6.28919	18.9191	6.42382
107053	GAACAATTGGACCTTCGCGTGCAGAAAAATGAGTCTAGACATAGCTCTTACACCCTTTACAAAAATTAACTCAAACTAAATTACAGACCTAAATGTAAAACACAAACCTGTAAAACTTCGAGAAGGTAACAGAAGAAATTTAGATGATCTTGGGTGTGAAGATGAATTTATATATGCAGTCAAAAGCATGAAAGAAATAACCTGGATATTATATAATTGATAAGCTAAATTTTATTAAAATTAAAAACTTCTGATCAGTGAAAGGTAATGCCAAAAGAATGAGAATGCAAGCCACAGAATGGGAGAAAATATTTGCAAAAGACACACCTGATAAAGGACTGTTATCCAAAATATACAAAGAACTCCACAATAAGAAAACAAATGCCTTGATTAAAAAAA…	522	chr8	128044990	128045511	+	none	none	1.79072	12.9546	8.46047e-06	2.37705	0	2.41537	2.89748	1.72356	1.76312	3.02496	2.50127	0	12.3104	21.1707	14.5006	11.7085	10.4964	8.0978	13.9371	15.2298	10.398	3.30741	4.57039	32.5852	30.3273	8.38559	10.2478	0
107194	GAAGATCCTCACCAGCGGGACCCTAAGCTGCCAAATTCCCAGAGAGAAATTAAGTCATTGTGAGGCTCACTGCTGAGAGAGTGTCAGCCACGAGCAATAGATCACTAGTGTTACTAATAGGCTCCTCACCAACACAGCTGCCTGGAATTGGCAAGTCGAGCTCTTCTGGGATCAGCCAAAGAGGACACCTGGGCTCCTCCCCATGTAGGTGGTTTTGTGGCCCTACTTGCATCCAAACAGCCCTTAATACACACAAAATTGTCGG	265	chr10	115993405	115993669	+	none	none	0	10.4598	9.14495e-06	3.25584	0	0	0	0	0	0	0	0	12.3104	17.3902	14.5006	0	25.6578	14.846	24.39	2.17568	10.398	2.20494	0	20.0524	0	15.723	0	7.70859
53312	CTGTTATTGGATAGACTGTAAGGTACATATCTAGTGGATCTAGTTGGTATATTGTGTTGTTTAAGTCTTCTATTGTCTTATTCCATTGAATTGTACTGTCCATTATTGAGAATAGGATATTGAAATCTCCAACTGTTGTGGAATTGCCTATTTCTCCTTTCAATTCTGTCTGGTTTTGCCTCCAACATTTGATGGTCTTATATAGGTG	208	chr3	174151937	174152144	-	none	none	0	12.1496	9.70165e-06	3.24842	0	0	0	0	0	0	0	0	10.4165	15.878	4.14302	32.7837	13.9952	32.3912	41.8114	0	12.2886	0	1.82816	1.67103	5.05455	0	1.57659	20.5562
106192	TGGACTTGCCGCTCACCCCTAATCCTCCCAGTCTGGATGGGCCACACTTCTCCCTTGACTCACACCACAGGTCATAGCTGCTGACTCTCAGGAAAACCAGCACCATTGTTTTCACTGACTCTTGACTCCTGGAGAAGGCAGGACTTCAGGCTAGGAGAGGGAGGACGAAGTGTACTCTTCTCCCCTTTCACTTTTCTGTCTCCCTAGAGCTTCTGCTGCTTTCTACTGAATTTTGTTTCTTGCTTGAAGAAGAGGGTAGTGAAGGAAAGGAGGAAGGCAAAACAGCAAGAGAGAGAAGAGGCTGTTTGGAACAT	314	chr7	140126053	140126366	+	none	none	2.5283	17.8064	1.02283e-05	2.37549	0	7.24611	3.86331	0	0	3.02496	4.16878	1.92324	25.5678	7.56095	13.4648	14.0502	3.49879	14.846	9.58177	10.8784	9.45273	49.6112	52.1025	20.8879	8.08727	22.0122	7.88295	15.4172
39581	CTCAGTCTTTTCATGGCAGAAATGTTTTCATTAATATCTGTATTGGTACCAGTAAGTCAGACATTATCCTAAATTAAAATACCCAAAGAGGAAAAAAGCCCTAATCTCCTAATCTTTAATCTGATTTTACCACACCTGAATTTACATGACTTGATCTAATATGTAACTTGTTTTGTATTCTCTAAAATGGGAGTTTTAGGATTACAGACACAAAATTAGGGAATATATTTGAAAGTGAACAAACTAACAATTCAAGGCTTTCA	263	chr2	42667905	42668167	-	none	none	0.18906	10.6889	1.04522e-05	3.12325	0	0	0	0	0	1.51248	0	0	16.0983	15.1219	9.3218	22.2461	13.9952	36.4401	0	1.45046	25.5224	0	0	5.84862	3.03273	4.1928	12.6127	5.13906
114078	AATTTTGGGCCTTACATTTCAGTCTTCAATCGATTCTGAGTTTATGTTGTTATATGGTGTTACATAGGAAGCTAATATCATTCTTCTCCATATGGATATTTAGTTTTCCCAGTGTCATTCATTTGAAGAGGCTGTCCTTTCCCCAGCGTATGTTCTTGGCATGTTCGTCCAAAATCAGTTGGCTGGAAATATGTGGATTTATTTCTGGGTGCCGTATTCTATGGTCTTTACCCCAAGAATCATTACTTCTTAAAATGCAATTCAAATTAGCATGAAACATTTGCAGTTTAAGGAAAGGCTTATAGCATCAGAATCCTTAATCATAGATTTCATTATTTTGTGTTGTTTTTTTGAGATAGG	360	GL000214.1	54528	54887	-	none	none	1.32734	14.5678	1.0927e-05	2.67308	0	2.41537	1.93165	2.58533	1.76312	0	0	1.92324	8.52261	9.07314	34.1799	60.8841	9.33011	21.5941	2.61321	1.45046	13.2338	9.92224	22.852	9.19069	2.02182	16.7712	6.30636	5.13906
72701	GTCGCTGCTTAGGCTTGCAAGGGGGTCCAGACCAGGCTGTGGATGGGAAATGGGAGGCTGGGGGAGGATGGAGGCTGAGCAGTGGCTGGATGTTGGGGTGCCCTGTTGAGGGGCAGCTGGCAGCAGCCACGGACACAGGGGTGGGTGCAAAGACACTGAGTTTCTGTTCCAGGAGGAAGGGGGGCCAGCTGGCAGAGGAGAGATCACCCTGGGCAATTTGGTGGTGCCTGGGGTGCACACTTCCCCAGAGGCAGCAGGAGGAGGAGCTGGATACACCCTTCCCTGGGCTTGGAGGAGAGCACGTTCCCTCCCAGCTCCCACCTGGCATCCAGGAGGGCCCGGCCTGGGGTCAGGGCACATGGGGCCCTCCTGCCCTGGGACTGGGCAGCTCCCTGGGGC…	654	chr4	776902	777555	+	none	none	3.3715	14.5736	1.12296e-05	1.90694	0	8.45379	5.79496	0	2.64467	3.02496	4.16878	2.88486	24.6209	5.29266	19.6794	14.0502	18.6602	16.1956	19.1635	12.3289	8.50746	19.8445	8.2267	10.0262	10.1091	14.6748	8.67124	23.1258
14849	GCCTGAATACCCAGTAGTGGGGTTGCTGGATCCCTCGGCAGTCCCATTATTAGTTTTTTTGAGAAAACCTCCTGTTGTTCTCTATAGTGGCTGCACTAATTTACCTTCCCACCAACAGCATGTAAGAGTTTACTGTTCTCTGGAGCCTCACGAGCATTTGTTATTTTTTTTGTCTTTTCAATGACAGCAATTTATTCAAATTGAAGCAAGATTATATCACATTGTAGATTTGATTTGTATTTCCCTGAGGATTAGTGATACTGAGC	266	GL000214.1	55240	55505	-	none	none	0.323167	10.7211	1.16556e-05	3.04796	0	0	0	2.58533	0	0	0	0	1.89391	11.3414	27.9654	38.638	4.66505	17.5452	5.22642	0	5.67164	6.61483	21.9379	8.35517	0	14.6748	3.15318	3.85429
58757	CGTGATTGTCTCTTAGTGTGTGCATTTGTCTGGTGTCTCTGTCTGTCTTAATCTCTTTTTAAAAGGACACCAGATATATTGGATTAGAACTCATCTTATTGCCTATTTTTTACTTAATTGCTTCTTTAAATATCTTGTCTCCAAATGGGTTGCATTCTGTGGTACTCAGATTTAGGGATTCAATATATGAATTGGGGGGATCACAAATCAGCCAATATCACATGAATTCTTTTTCTAGCAAAGAAAGCATCCATTCTATTAGGAGTCTTCCTTTACTTAATAGAAAACCAGCAGAACAGTACTATGTTTATACAAATGTAAATTAATTTACTTCTTCCTGTATGAGAGCACTCATATGTGTGTGCATGTGAAAACAAAAGTCATAAAGTCACTGTATAT…	482	chr5	34137688	34138169	-	none	none	2.56715	16.7122	1.16778e-05	2.27931	0	2.41537	1.93165	2.58533	3.52623	3.02496	4.16878	2.88486	8.52261	34.0243	62.1454	17.5627	6.99758	9.44743	12.195	7.97751	29.3035	3.30741	10.9689	25.0655	9.09818	8.38559	13.401	8.99335
89985	ACAGGCATGAGCCACTGCACCTGGCCAACTCTTTCAAGAAGAAGAAACATTTTAAGACCATAACTAGTCCTTGTACCTCATATAATGTGATCTCATTGTGCCATATATTCTCAGTGTGTAAACTTTTGTAGGGCCAAAGAAAAAACTTCCCTTTTGTCCTCTGAAGGTTTGGTGAAAATCAACTGACAAAAGGCAGATAAATAGAAGAAAAGGATTTTATTTGATCATAGTTTTATGTGACTTGGGAGCCTTCAGAATGAAGACCCAAAGGTATAAGGGGACAGTCCATTTTATGCTTAGTTTCAACAGCATATGGACAGCTGTGTAGAATATGGTTGGACAAAGAGGGTATAACCTAATGCTATTAGACTGGGGAAATCCAGTAAGACCTGTCTGCTT…	520	chr8	82600120	82600639	-	none	none	2.61654	23.5417	1.18611e-05	2.53033	0	0	1.93165	4.30889	4.40779	2.26872	4.16878	3.84649	4.73478	3.78047	25.8939	2.3417	11.6626	18.8949	4.35535	34.0857	22.6866	56.226	43.8758	60.1573	44.48	25.1568	15.7659	2.56953
103372	GTTGACACATTTGCATTTTCAGTTACTAAAGAGCTTCCTCCTTTCAGAAGTATCTTCCCAAATTACTAACAGGCCCTGGTGTTTGTGGGAACAGAAGGGCTTTTCCTTTGATGTAATCTCAAAGCAGTTTCAACACAATTGAACCCCTGGAAATTAAAAAAGAAAAAAAACGACAATTCTCTGAATACTTTTCCTGGTAATTTAGAAAAGTAGTGCATTGACCCACTGAGCCTGCTCTTTTTTCTCTCTATCGCCCAGGCTGGAGTGCAATGGCACGATCTCAGTTCACTGCAACCTC	298	chr7	38296470	38296767	-	none	none	2.47949	21.2109	1.26248e-05	2.48144	0	0	4.82914	0	1.76312	9.07488	4.16878	0	11.3635	17.3902	49.7163	5.85424	8.16385	4.0489	33.1007	29.7343	24.5771	17.6395	28.3364	20.8879	41.4473	3.1446	36.2616	7.70859
43722	TCCTCCTCTCCTGTTCTTCCTAAGACATCATCACTGAAATTTAAGCTTATAAATTTAAAATGGAGTAAATCTATAAGGGAAAAGCATTAAAAAAAGAGAGAAAGATGGCTTACTAATGGATGAGAGTCCAACACATTTCTGGAAGACAGGGTTCATGAGAGGCCTAGCACTGTGGCTCCCACCTGTAATCCCAGCACTTT	200	JH591181.2	685732	685931	+	none	none	4.12753	17.9685	1.26321e-05	1.91431	0	10.8692	1.93165	2.58533	6.17091	4.53744	5.00254	1.92324	17.0452	13.6097	13.4648	23.417	5.83132	20.2445	40.0692	13.7793	25.5224	7.7173	27.4223	6.68414	24.2618	14.6748	15.7659	17.9867
68076	AAGGTATTGTTCAGTACTTTTCCATTAATTTTTCAAAGGTCTTGACCTCCTAATGAAAAATTTCTGACTAAAAGGGGTTTTCCTCACCACTCAGTTCCTTCTTCTGCTAGGTCCTACAGTGAATCAATATCTCGTATTTGGTCCTTCAGACAGTTGCCACGGAAATGAGAGCTGCAAACACTTTCAGCTTTCTGGCTTCACTGTGGGATCCAGCATAGAACATGATTGAGCTGTCAGAGAACCTCCTGAAGGAAAGTTGTACCTGATAAGTAAGAGTTTCCAGAAAAATGGTGACACATACAGGAAGAAAAATAGATTGTTTAACTCAGTCTGAAAAATCCCTTTTGATTCATAAACTGTCTACATGATTGAAACATACGAAACCATCTCTTTCTCTAA…	647	chr4	123631878	123632524	+	none	none	1.8891	11.3801	1.43438e-05	2.22483	2.93637	0	0	2.58533	3.52623	1.51248	1.66751	2.88486	19.8861	18.1463	14.5006	11.7085	8.16385	22.9438	13.9371	4.35137	15.1244	2.20494	10.0549	5.0131	16.1745	4.1928	11.8244	3.85429
119680	AGAGCTCACTGCAAGACAGATGAGAAAGAGGTTGTTTTAAGATGAAGAAAAGGAATGATACTTGATTCATCATCTTATACATGATTCACAAGAAAAATATAATGTCTTTATTTTTCAGAGGGTTTTTTAAAATTAAGAGATGGGATCTTGCTACGTTGCCCAGGCTGTAGTGCTGTGGCTATTCACAGGCATGGTCATAGCTCACTACTGTCTTGAACTCCTGGGCTCAAGCCATCCTCTTACCTCAGCCTCCCATGTAGCAGGGACTACAGGTGCCTGTGACCACATCTAGTTTTCCAGTGGGTTTTAAAATGACCTAAGTGTTTGAGGAGAGGAACAGGCTGGCACTGAGAGGCATGACTAAATTGTGAGCCCTCCTTGAGGACTGGAGCTGTGTCT…	521	chr9	110205930	110206450	-	none	none	1.74195	12.0736	1.46135e-05	2.37589	4.40455	0	1.93165	0	1.76312	0	5.8363	0	9.46957	9.07314	5.17878	2.3417	13.9952	8.0978	25.261	17.4055	19.8507	8.81977	22.852	21.7235	12.1309	5.241	7.88295	3.85429
89067	TTTCAGCTCCGAATATTCGTCCTCGTGCAGCGCCCCCGCCCCCAGCTTTCCAGATGGGAAGGTAAAAAGTTGCCACAAGTTAGAGTGAGTTAGCTGCTGGCAAAAGTTTAAATAACTACCGAGGGAGGTGAGGGTTCGACCAGGAATGGGTTCTAATCTGAGGACGGGTAGGAAGGAAGGAGAGTGTGCGATTCTTGCAGCCCCTTTGCTGTGACATTGCGACCAGAATTTGTCGAATCGGGCTGTTAAAACACCATTTCTGTTGGGCATTTGCTCCTGCTGACTGCGGCAGTAACTTTCCATAATTAATGACCCGTTCCATTATCGGTCGCATCCTGAACTAAATTGCTTTTAACGAGTTATTCTTCTTTGTCTTAGCTGGGGGGTGGGGGAACACAC…	432	chr7	25989619	25990050	-	none	none	7.14223	26.7836	1.89204e-05	1.76454	11.7455	7.24611	4.82914	4.30889	8.81558	11.3436	5.00254	3.84649	33.1435	20.4146	17.6079	29.2712	40.8192	22.9438	33.9717	13.7793	24.5771	26.4593	75.8685	30.0786	23.2509	10.482	7.88295	17.9867
37682	AAGGCTCCAAGTGAAGTTACAAAATTTATATTTGTACAAAACTCCTTTGAACAATTATTTGACAGTAACCGTCTTTTTCTAGTTATGTTTGTTGACCTGAATTTCTCAGCCACCCTTTGCATGTGCGAATCGTGAGACTCTTGTTCTCAGCAAAGATGACTAATGGATCTTTTAGAAATTCATGCTTTGATTTTCTGTGTTAGCCGTGGAAGCTGCTTCATTT	223	chr21	38063349	38063571	-	none	none	1.08716	10.5153	2.33777e-05	2.51982	0	0	1.93165	0	1.76312	0	5.00254	0	6.6287	8.31704	17.6079	3.51254	0	8.0978	26.1321	12.3289	9.45273	8.81977	19.1956	8.35517	12.1309	5.241	3.15318	19.2715
10044	AATATTTTGAAAGGAAAGTCATGAAGTCTTAAGATACTAGATATAAAACCATATTTCACAGCTAAAAAATATTGAAAATGTACTAATAGTTTACATTTGAACCCTTAGACCAAGGCAGTAGTAGCCCCGAAATAGATGTGAGTATAAATAAAATGTTCCAAAAATCCTAGGAACATAAGGAAGGTAAACTTTTGGAGAATACTAGATTATGGCTT	215	chr9	79123721	79123935	+	none	none	1.33061	10.2075	2.56572e-05	2.4089	2.93637	0	1.93165	0	1.76312	1.51248	2.50127	0	28.4087	5.29266	7.25029	12.8793	10.4964	10.7971	13.0661	7.25228	2.83582	2.20494	18.2816	17.5459	11.12	8.38559	2.36488	5.13906
48415	TATGGCTTATAATTTTCCGTAGTTCTTTTCGTTTTGTCAGGTTTTCTTATGAAGGTTATTCAAGCCTCATAAAATGAATTTGGAAGTGTTCCCTTTTTTTCTATATTCTGGAAGAGTTTATTTAAGATTGGAATTGTTTGTTCCTTTAATATTTGGTAAAACGTATCCAGATAACCATCTGACCTAGAGTTTTCTTTGTAATGAGATTTTAAACTA	216	chr8	128034740	128034955	+	none	none	4.2386	18.7516	2.70339e-05	1.92631	5.87273	0	7.72662	3.44711	3.52623	3.7812	6.67005	2.88486	10.4165	30.2438	27.9654	8.19593	24.4915	10.7971	37.456	15.955	19.8507	6.61483	7.31263	31.7497	32.3491	15.723	15.7659	5.13906
44148	GCAAACAGTCACTCGATAGCGGGTTGGCGGAAGTGTAACAGTGTGATGGTGCCTTCACCTGGGCAGAGAGCAACAGGGGGCCCTGCACAGAAGACAACATCTGCCAGTGATGAAACCAGCTCCACCCCTGCCAACCGTGGCCTCCTCTACAGCACATACCTGGGGCCACCATCCAAGGCCCAGAGGAGCCAGGAGCTAATTGCATGGCTTTGCTCTACTTGATATTTCTGGGTTCCTACATTTCACACCTGTCCCAACACTTTGAGCTCCTCTAGAGCAAGGACCAATTCTTTATCTCCAAATCTCTGGAACATAGAGGAACTGAGAATGGGTGCT	336	chr9	110205515	110205850	-	none	none	2.00223	13.3132	2.74224e-05	2.32216	5.87273	0	0	1.72356	4.40779	1.51248	2.50127	0	16.0983	9.82923	5.17878	0	13.9952	8.0978	30.4875	14.5046	15.1244	14.3321	27.4223	25.0655	12.1309	5.241	3.94147	11.5629
116229	ATAAGCTGCATTTATTGTTATTTAAATTGGTCCAATGAGTTTGTTTATTATTTGTTAGCTTAAGTTTAAAGATGTAATTTTGCCTGGATGAGAGAAAACATCTCATAAAGATACTCTTAGTCTGTTAGATCCACTGAAATGAAAGTTTTCAGAGAATTTTCACAAAGTTGATAAAGCATCGGAAAAAATGAAAGCAGTTTTACATTTTTAATTCCTTAGTGGTTGAGATCTTATGATAAAATGAACTTATAAGTTAAAAAGTGACCTTCCGATTCTCTTTTATCCAATTGACTTAATGAGAATTGTAGCAATCAAATTCATAATTTGTAATTTTCTGAGAAGTGATTTTTCAGGAAAGTGCGGTGCAAGAAAAGGTATGGACTTTGTTTCTCGACTCCT…	775	chr7	38311953	38312727	-	none	none	80.1259	502.404	2.82769e-05	2.24958	80.7501	38.6459	197.029	5.17067	49.3672	186.035	66.7005	17.3092	370.26	258.584	326.263	420.334	139.952	417.037	315.327	485.903	498.159	1407.86	566.729	424.443	1884.34	133.121	271.962	118.198
114300	AAAAGCTCCTAGCACTGATAAATGAGTTCAGCAGAACTTCAAAACACAAATCAGTAGTACTGCTATACACCAACAGTGACCAAGCCGAGAATCAAATCAAGAACTCAACCCCTTTTACAATAGCTGCAACAACAACAAAAAATGAAATAAAATACTTAGGAGTAAACCTAACCAAGGAGGTGAAGGACCTTTACAAGGAAAACTACAG	208	chr5	13968111	13968318	-	none	none	0.521098	9.68849	2.93414e-05	2.81422	0	0	0	0	0	0	4.16878	0	12.3104	3.78047	2.07151	4.68339	3.49879	4.0489	19.1635	29.0091	3.78109	7.7173	12.7971	23.3945	10.1091	2.0964	16.5542	0
112599	ACAATCTGTTATTATTTCTTATATCCTCAGGCGATGTTACTTCTAATGTCACAGGGGTTGTACATTTTGCGATATTATTCGTAATATTTTAGAGAGATGTTACTCCTAATGTCACAGAGGGTGTACACCTTGTGAAGTTATTCATAATAGTTTTGGGGGCTGTTACTCCTAATGTCACCCGTGGTGTACAAACAGTGATATTATTCATAATATTTTATGGACATGTTACTCCTAATATTGCAGGGGCTGTACACCTTGTAATATTATTCATAATATCCTAAAGAAATGTTACCTCTAATGTCACAGGGGGTGTACACTGTATGATATGGTTCCCCATATTGTAATGGGATGTTACTCCTAATATCACAGGGGGTGTTCACACTGTGGTAATATTCGTAA…	636	chr12	52505376	52506011	-	none	none	14.4108	42.8603	2.97216e-05	1.5045	30.8318	13.2845	9.65827	12.9267	9.69714	16.6373	11.6726	10.5778	49.2418	52.1705	47.6448	44.4922	45.4843	43.1883	71.4278	43.5137	49.1542	30.8692	60.3292	41.7759	12.1309	9.43379	28.3786	56.5296
6237	ACCCCCTGCGATATTGGGAGTAATATCATCTTGTCGCCCTCTGGATATTAGGAAGAGTTTCACAGGGGTGTGTACACTCCCTGCAACATGGGGAGTAATATCATCCTGTGCCCCCTGGATGTTAAAAACCAAATCACGGGGGTTGTACACCTGCTGCGATATTGGTAAACGTTACTTCTAGTATCCCACAGAGGGTACACCCTGTGATATTTTTCATAATATCATAGGGAGATATTGCTTCTAATAACACAGTGGGTGTACACCATGTGTGTACACTCTGTGATGTGATAGCTTATATCCTAGGGAGATATTCCTTCTAGTATCACAGTGAGTGTACACCCTGTGATATCATTCGTAATATCCTAG	366	chr12	52508154	52508519	-	none	none	8.46773	26.0864	3.63183e-05	1.54588	16.15	7.24611	8.69244	11.2031	7.93402	5.29368	8.33757	2.88486	20.8331	34.7804	16.5721	24.5878	34.9879	25.643	45.2957	28.2839	40.6467	26.4593	31.9927	15.0393	11.12	10.482	13.401	37.2582
113749	GCCACAGGTCAGCCCCAGACTGTGAACCCAGCTCAGGCAGCCAGGACCCAGGACTGGTTCCATCAGGGGCATGAGGGCCCACAGGAGTGAGCGAGGGAGAAGGATGAGGACAGTGATTATTGTTCCCCCTGTATGGATGAGGAAACTGAGACTCAGAGGAGTAAAGAAAGCAATGAGCAGTCTGAGGTTGGGGAAGGCCAAACCTCACTTCCTCCTCCCAAATCATGTGTCTTCAGAGTACATTC	245	chr15	69866922	69867166	+	none	none	0.671974	9.34285	4.07092e-05	2.68408	0	0	3.86331	0	0	1.51248	0	0	11.3635	9.82923	12.4291	9.36678	18.6602	0	18.2925	0	12.2886	3.30741	9.14078	2.50655	3.03273	11.5302	11.0361	16.7019
1140	ACCTTAAGTTTCCAGGGGAGGAATGTCAAAGGATGTGGTGATGTGCTTGGAAATCCCCACACCCAGCACTAGGCTGTTAAATAACTTATGGCCCAACTGTACAAAGGAATACTAGGGAGCCATCAAAAAGTAGGCTGCTGTGCTTTGTATTGATGAGGAATGATCTCCCAAGATGCAGAGTTAAGTGAAAATAAGCTAGGAGCTGGGCAGCATAGATAGTATGTGCTGCTACTAACGTGCACAGAGAAAGGGGGGGTGGAGACACAACACGTGCCTGTATGTGCACAGACCAGCTCCAGGAGGATGCATGAGAAATCGGCAGCAGGCTTGCTTCTGGGGAAGAG	344	chr20	56326171	56326514	-	none	none	2.19525	14.7284	4.36413e-05	2.31445	4.40455	3.62305	2.89748	1.72356	2.64467	2.26872	0	0	29.3557	15.1219	6.21454	5.85424	22.159	14.846	45.2957	8.70274	19.8507	13.2297	5.48447	3.34207	32.3491	7.33739	3.94147	2.56953
20948	GGAAAAGGGATTGAGCGGTTGGAGTGCAGCAGCTGAGAAACAGCAGAAGAGAAATGGAGAAGGATGAGAAAGAGACCAAGAGCATAGGCTGAAGGAAAGAGGGGTGTGAGAACACAGGGGAGATCCCAGGGGCTGCAGAGGCTGCAGACCCTAGACTGTGAGAGCGAGACCAGAGGCAGAGATGACCAGAGAGAAACCAGGGAAGAGGAACAGAGAGAGACACATGGAGACAATTCAAGATAACAAGAGATGTACGCTGAGAGAGAT	267	chr2	219864403	219864669	-	none	none	1.70785	13.4565	4.40458e-05	2.3418	0	0	1.93165	0	0	7.5624	4.16878	0	31.2496	14.3658	8.28605	5.85424	5.83132	18.8949	22.6478	5.80182	5.67164	23.1519	20.1097	10.8617	23.2509	11.5302	3.94147	3.85429
91775	ATTCATACATGAGGAAACATCACACATACTCAAGATGGGAGAGCCATTCTAAAAAATAACTAGGCAGAAATCTTCAAAAATATTAAAGTCACGGAAACCAAGAAAAAATATGAACCTGTTTCAGATTAAAGGAAACTAAACAGACCTAACATTTTAATACAATGTTTGATTTTGAACTTGAACTTTTTGTTATATAAGACACTATTGAGACAAGTGCTAATGCTTGAATAGGGCTGAAGGATTAGATTATAATAATACATTAATGCAAATTTCCTGATTTTAAACATTGTAGTTTGATTGCACAAGGAGAATGTCTTTATGTGTGGAAAATAAATAGTCAACATTCTGTCTTCAAGCTTCTGAGAAAACTCTGCTTTTAGGGCATAGATAGAAGTGGAT…	664	chr5	69275864	69276525	+	none	none	25.0522	74.2558	4.51142e-05	1.47147	17.6182	21.7383	29.9406	46.536	26.4467	19.6622	25.0127	13.4627	45.4539	67.2924	121.183	39.8088	41.9855	90.4254	97.5599	42.7885	120.995	28.6643	42.0476	91.0714	86.9382	54.5064	150.564	66.8078
90880	TGGTTCTGCCAAGTGAGACACATCAGGGCCTATCACTTGCCCAGAGGCGCACAGCCTCGGAAACCAGGCTTTGAATCGTGCACCTTTCTCAGGTCTGCTGCCAGATCCCTCTGACTCTACCCAAGTTCATGGTTGCATTGAGAGCTATGGAGGTCACCAAATAACCAGACTTGAGGGTCCAACTCCTGTGAGCCTGGTCTCCACAGAGCACATGGTCCACATTGAGGCTCACTGAGTAAGGCCTTGTCACAAGCTGCAAGTGG	263	chr19	51299079	51299341	-	none	none	2.73928	13.706	4.75065e-05	2.01065	2.93637	3.62305	0	1.72356	0	5.29368	8.33757	0	9.46957	9.07314	18.6436	8.19593	11.6626	22.9438	28.7453	15.2298	3.78109	5.51236	16.4534	16.7103	13.1418	12.5784	7.88295	19.2715
63997	AGGTAACTTTTGCGTAGCTACAAAGAAGCATTCAACAGAGAGTTAAACCTATGATGGAAAGACTGAAGAGGTCCAAGCTGTAGAGAAACAGGACTGCAAACCACAAAGGGCTGAATCAGTCAAGGAGAACTGCACGGCGGGATGAACAGGGACCAGTGGAACATTTGGATAAGCTGTTGAGAAGAAAGGAGAATTCAGAGAAAAAGAACTG	211	GL000214.1	48884	49094	-	none	none	1.57898	14.4701	4.81928e-05	2.47353	0	0	1.93165	5.17067	2.64467	0	0	2.88486	1.89391	9.07314	12.4291	23.417	3.49879	17.5452	8.7107	4.35137	7.56219	35.2791	42.9617	15.0393	2.02182	31.446	4.72977	11.5629
63550	TACATATTTAATGTGTATGCTTTGTGTTTGGAGACAAATATCACCTATGAAACCATCACCACATTCTATGTCATAAACATGTCCATCACCTCAAAGTTTCCACCTGCTCATTTTCTATTTTTTAATCTCCATTAGAGGAGATGAGGTACATAAATAAAATAATTTCAGGGACTTGGTCTCGGCAAAGATGTATGGCTAAGACTTCAAGGACAGGCAATTTAAATAGACAAATGGGACTATATTAAACTAAAAAGCTTCTGCACAGCAAAGGAAGCAGTCAACAGAGTGAAGAGACAACCTGTTGAATGGGAGAAAATATTCTCAAAGTATTCATCCAACAAGGGACTAATACCTAGAATATACGAGGAACTGCAACAACTGAATAGTAAAAGACCCACA…	461	chr13	95669538	95669998	-	none	none	7.00489	22.6337	4.83896e-05	1.60262	10.2773	9.66148	6.76079	8.61778	7.05246	3.02496	5.8363	4.80811	17.9922	20.4146	30.0369	10.5376	18.6602	22.9438	41.8114	13.7793	24.5771	47.4063	16.4534	26.7366	23.2509	8.38559	27.5903	11.5629
61666	GAATCTGCCAGTGCCTTGATCTGGGACTTCCCAGCATCCAGGGCTGTACGAAAGTTCTGTAGTCTGTGAGCCGTCCAGTTTATGGTATTTTGTTATAGCAGCCCAAATGCTATATGTACTTAGCCCATGTGGACTAAGATAATTGGTAAGAGGTCTTCACACTTTCTCAGCTACCAGAAAGTACATTTGAATTCAACTGAGGAAATCTATTTAGTCATTGTTTTGCCATGTT	232	chr2	123298564	123298795	+	none	none	0.921161	10.0243	5.19143e-05	2.60688	2.93637	0	1.93165	0	0	0	2.50127	0	4.73478	33.2682	17.6079	2.3417	8.16385	4.0489	23.5189	10.1532	14.1791	2.20494	7.31263	8.35517	13.1418	0	2.36488	8.99335
33005	TCCTGCCCATGGGAATGTAAGGAAGTGCCGTTTCTGGATATGGGACTCATGTCTCTGTGTAGGACTCATCTCCTCCATACTCTTTCCCCTTCCCCTGGCTGGAAGCAGGGGAAGGCAAGTGAATTCAGTCACGTAGACAACAAGAAAGCCATGGGGATGGGGGAGCTACACGGGAAAGGGACTTGGGTTTCTGAGTGACTGTGTGGAGCTGAGCAGCCCTCACTACTTGGAACTCCCTGTAAGACAGAAAGAAACTTCTCTGGTCTAAAGCCACAAGGACTTAGCTTTACCCCAAGAACAGAGCACACCCAGTGGAGCACT	321	chr21	38014688	38015008	-	none	none	5.36116	28.9423	5.25908e-05	2.08509	0	6.03842	12.5558	1.72356	7.05246	0	11.6726	3.84649	18.9391	8.31704	29.0012	37.4671	20.9927	28.3423	26.1321	36.9866	12.2886	51.8162	57.5869	10.0262	27.2946	16.7712	7.88295	73.2316
92427	ATGGGACTGTAGTTTTAAAAAATGCCCCTTTGGGAACTCAAGGGCCATGCATCCTGTACTGAGGTCTCTGCAGCCATGTGAACTACCTTCACAGCATCAGAGAAAAGATCCTTTGGATTTGTGAGACCAGTTTCCAGCCCCACTATAATCGAGCCTGAACACTAAGACTTCCCTGTGCACCGGCAGATTTTCACTTCACTTTCGGTAAGGCATTTGGAAGCAGAACGGCCTCTTTGGACTGAAAAATACTGAGTGAGTTACCTGAGAACCAATGTGAAGTAGCTGTTGAGGTGAGGCCTCTTGGAAAAACTGGACTTCCTGCTCACCTGACATAGGAAGCTTGTAAGGTTTTCATTTGAAGGGATATTTGATATTTAGTTTATTTTACTTCAAATTGTT…	471	chr8	82601375	82601845	-	none	none	2.1009	18.2712	5.28285e-05	2.42856	0	0	1.93165	3.44711	2.64467	3.7812	5.00254	0	5.68174	5.29266	22.7866	8.19593	5.83132	10.7971	0	26.8334	12.2886	42.9964	32.9068	50.9666	36.3927	16.7712	9.45954	5.13906
78427	CATGTGGAACCTGAATTATTTTTTAGTGAAGAGAGTGGTTATTTAAAAAGAAGTCATCTCCAAAGACTAAGTGTAGTTGGCAAGATGCCCACAATTTCTGGGGAAGGAATTCCTATGGCCCCTCTTTATTGTACAAATACAGAACAAGGAAGCACCTATTGCCCACTGGGAAGGATGACCAGACCACTTTGTGGCTTCACAGGGCCACCCTTCCCTAGAACTCTCTTGTGTACACTCAGCTGTCTGGGGAGGTGTCAGGGGCATTGGATCTCACCTCTCTTTCATTCTGAGGTTCAGCGTAATTACAACCTCTCTCATAGATGGGAGTCAGCTGACAGGAAAGGATACCAAAGGCCTCCAAGAGGGAACTCCCCTTAGGGAAGGTTGGAAGAGTGAGGA…	501	chr8	82601847	82602347	-	none	none	2.52891	18.1438	5.36372e-05	2.30382	0	0	1.93165	5.17067	4.40779	0	5.8363	2.88486	4.73478	3.78047	26.9297	3.51254	8.16385	14.846	8.7107	20.3064	7.56219	33.0741	28.3364	48.46	38.4146	23.0604	16.5542	3.85429
903	GAGGGATCAGGGGTAACCAGCATTTAGAATTCCTAAGACTCTTCTTGGGAGGCTGAGGCAAGAGGACTCCTTGAGCCCGGGATTGCAAGACCAGCCTGAGTAACATGGCAAGACCCCATCTCAGAAAAGAAAAAAAAATTCCTAAGACTCATTCCTCTTCTGTTCATGATTTCTTTGGGAAAAATTTTTCCTATGTTCCAACTGTGGAAGACTGGATACAC	221	chr4	123627603	123627823	+	none	none	3.90209	14.2065	5.59439e-05	1.71744	5.87273	2.41537	6.76079	3.44711	3.52623	2.26872	5.00254	1.92324	10.4165	12.8536	13.4648	22.2461	10.4964	26.9927	20.9057	7.97751	24.5771	9.92224	14.6253	5.84862	15.1636	4.1928	17.3425	10.2781
46424	ACAAAGTCCCACAAGGTGGTGCCCAAATATCTTTTTTCAAACAACACTTCCTGAAGACCCATGCAGAGTCCTGACTAAATTGTGTTAGTATTTGGCATTTCTGAATTTGGTCAATTAGAATAACAGAAAATATATAATTAAGTAAAAGTTACTCAACATTAAATAACATTATATATGTGATTTCAAAATCTATAGTTCTGGATAT	205	chr7	7581037	7581241	-	none	none	1.32406	17.4242	5.7026e-05	2.65627	0	0	2.89748	0	3.52623	0	4.16878	0	3.78783	6.80485	15.5363	0	5.83132	6.74817	8.7107	39.1623	5.67164	15.4346	34.735	50.131	43.4691	3.1446	37.0499	2.56953
53755	CCGCAAGAATAGGCTGGGCTGGGCTGCTGAAGAAGGAGACACATGGAATAGAATGGAGTTGCCCAGTCATACTGGTTGAGACCTTTCTATATCAGAGCAGTAAGCCAGCCCCTAGACATAAGGAAGCCCAGCAGAAGTCAGCAGAGCTCTTAGGCAATTCACAGCTGCCTGCAGGGTGAGCCACTGAGCTCAGCTGAGCTGAACCTGTACTGTATCAGCTGAACCCACAGACTCG	235	chr4	188301341	188301575	-	none	none	1.75914	23.2879	5.71799e-05	2.67066	0	0	5.79496	0	1.76312	1.51248	5.00254	0	2.84087	20.4146	13.4648	0	16.3277	5.39853	64.4592	5.0766	76.5671	63.9433	38.3913	5.0131	14.1527	26.205	2.36488	17.9867
11860	GGAAAAAAGAACACAGTCAGTGAGGGTCTTTGCTCCTGTTCCCCAATTTTCTTTGTCCAAATGGCTCAGCCTTGAATTCAAGAGGAGTGGTGCAGGATTTAATTGCTCCCACTTGTCTTCCTTGTGCAAAACTGCAGCTAGAAGAGCAAATGATAAGTTGAGAATATTTAACACTCAGCAACAATACCAGGAACTTGTTCAAACTTTGTTTTTGAAGCTTCTTGACCTTCCAATGATTTATTTCTTCCACACATGGTTTCATTAGAACTTCACTTGGAGAAGAAGAGAAATAGCAAATAACAGCATCTTTCATCTATAACCAGAATATTCCAAGCCTTTCAAAAGTTGTTGCAAAAAGAATAAAGTATGAGCTACCTAGGCCTTGTTTGTCTGAGTCTT…	636	chr4	188295200	188295835	-	none	none	4.69699	38.5437	5.76783e-05	2.41013	0	3.62305	8.69244	0	0	7.5624	10.0051	7.69297	6.6287	37.8047	24.8581	8.19593	30.3229	70.1809	68.8146	11.6036	127.612	72.7631	55.7588	15.0393	23.2509	17.8194	2.36488	43.682
42804	AAAAAAGAAAATAACAATGGTGTCTGTTTCATGCACACAGATGTTCACTGCAGCACTATTCACAATAGCAATGACATAGAATCAACCTAAGTGTTCTAAATGACAGACTAGATAAAGAAAATGAGGTACATATACACCTTGGAATACTATGCAGCCACAAAAAATAGTGAGATCGTGTCTTTTGAGGGAATATGTATGGAATTGGAGGCTATTATC	216	chr8	128039283	128039498	+	none	none	2.59579	14.7726	5.81305e-05	2.12253	0	2.41537	1.93165	4.30889	5.28935	2.26872	1.66751	2.88486	17.0452	18.9024	24.8581	8.19593	4.66505	5.39853	13.9371	29.0091	11.3433	7.7173	6.39855	45.9535	26.2836	6.28919	3.94147	6.42382
41866	GGTCATAAATTCATGTTAACACATCCAGTGTACATGAAGTAGGCACCGAGTTAAACTATTTGTCTACTATATAGCATGTCATCTTAAAAGCCTTATTTTTTCCTCAAAATATTAACTTTATTTTTCTCCCTGTAAAATCAAGACACAGTTAAAATGTAGCCTTCCTCATTTTCTGGGAATACTTTCTAACAAGATATGCTTCTTTCCAATTGGACTTCTAAATTTCTAGCAATTCTAACAGTGCATAAAAGAGGCAACCCCAAAAGTGTAGCAGGTACTGAATAACAGATTTGCAGCCTTGGGTATCCACATTAAAATTTGAAATCTAAGTGAATTACTTCAAGCTGATTTCTTAGGTCAAGGAGAGATTATGGTCCTTAAATGCCTGATAAGGTCACA…	487	chr5	69279579	69280065	+	none	none	23.8083	71.6508	6.08204e-05	1.48454	17.6182	12.0768	30.9065	43.0889	29.973	18.906	22.5114	15.3859	58.7113	68.8046	142.934	51.5173	43.1518	71.5306	108.884	30.4596	126.667	28.6643	41.1335	86.8938	85.9273	44.0244	109.573	47.5363
96429	GAAAATAATCAAGAAAAAATTTAAATAAGAGTTTTGGAAAGTTGCCATTTTGTTTCTAAATTCAGGAGATGGTGAATAATCTGGAGGTACAGCTGTAAATACTGCTGCATCCCAAAACTTGGAGGGTGCAGATGTGAAATTGAGATGTTATATAAAGTTAGATATTAACTAGGGGGACTGCTCATGGTATACACATTGAAGCTACATGGTCAACTTGATAGACAGTATGTACATGCGGAAGTAGATTCTCTTTAAAACAAGTGACTGTGTATGTTAAAAATAAAAGTGAACAAAATGGCTAGGCATGGTGGCTCACACCTATAATCCCAGGATTTGGGAGGCTGAGGCAGGCAGATCACTTGAGCGCAGGAGTTTTAAACCAGCCTGGTCAATATGGTG…	471	chr7	38306027	38306497	-	none	none	27.1896	150.503	6.15648e-05	2.11619	11.7455	6.03842	63.7446	6.03245	21.1574	67.3054	36.6853	4.80811	78.5974	112.658	139.827	94.8387	24.4915	58.0342	174.214	201.613	180.547	170.883	178.245	129.505	540.837	53.4582	231.759	38.5429
11735	GAGAAATTCTCAGCCTATTTACATAGTTAAGAGACCTCAGGAAATAGTCTAATAGGTAAAAGAGTAATACATTAAAAAATTAAATTGTTCTATAAAAATTGATCTGAGAATTTTGAATTACAGGGACAGTCTAAGTAGGTGGTTTTAAGGGGTCCAGAAAGAAGAGAATTGTAAAAAGTAAGAGAAGATAGAAAAAGAGAGGTCTAGTAATATGCTGGAAGCTTTGAACTGAGGAGAAATGGTAGTCAGCAG	252	chr8	128038558	128038809	+	none	none	2.92439	15.3619	6.23996e-05	2.04941	0	2.41537	4.82914	4.30889	1.76312	3.02496	4.16878	2.88486	12.3104	20.4146	30.0369	5.85424	15.1614	9.44743	14.8082	18.1307	6.61691	8.81977	4.57039	57.6507	18.1964	8.38559	10.2478	5.13906
63915	TCCACAATGCCAAAATTATTTTCAGAGTCATACTACTTGGCGTTTTTCACTGTGTTGACATTTGCACTGATGGTGCAAAAGCAATGATGTGCAACTGTGCAAGTGGTCATTGTATTCTTTACCACTATGCATGCCCAGAGATGGGGGGAAACCCAGTTTCACTTAACAATGTCTTTTATTAAGCAGTAAATATTGTTATTTTTATTAAATTTTGACCCCATTTTTACTTGAAAGAATGACTAACAGACAAACTATGATTATTCAGATGTGGGCATGTAGCAGAC	284	chr5	148254978	148255261	+	none	none	4.19253	14.6413	6.29892e-05	1.61165	0	2.41537	3.86331	5.17067	4.40779	4.53744	8.33757	4.80811	9.46957	16.6341	18.6436	11.7085	3.49879	12.1467	23.5189	11.6036	17.9602	11.0247	14.6253	18.3814	29.3164	13.6266	11.8244	10.2781
113807	GAGGATTAAGTGAATTAATATGAGCAAGGTCCTCATAAGAATGCCTGACACATGGTAAGCCCTATTATTATTTTTGTTACATTATGCATATTTAAATGATCTTATAAAGCAGTTGCAAGGGCATGGATGGAATTTGGAGTATATTTTATTTCTTTAATAGATGTATCAAGGAGGACAGATTTTACATAGTAAAACTTGTCCAAAAATATGGATAGGGATGGGGTGACCCAAGTTATTCCTTTTTAAAAAAATAAGAATGAGAGGCATAAAGCAGACTGACTAATCAGTTGAGTTCATACCAACTATTTTCCACAGCCACGATTCTATAAGATAGAATAACGATCCAGAGATAGAATGGTTATGCCAATTTTTAAAAAAGTTTCTTTCCAGCTCTTAAGA…	653	chr8	82602349	82603001	-	none	none	3.15486	20.5981	6.87083e-05	2.23095	0	3.62305	2.89748	6.03245	6.17091	1.51248	5.00254	0	2.84087	9.07314	19.6794	7.02509	6.99758	25.643	1.74214	36.9866	19.8507	50.7137	26.5083	35.9273	43.4691	25.1568	10.2478	7.70859
30745	TGCAATAATAGTATTAGGAGGTGGGGCATGGAAGCGAAACTACCCTGTGGAGGAGAGAATAGTTTTGAACTGCATGAGCCAGAAAGCCAGAAAGCCAGAAAGCCATTGTATGGGAAACACCTTTAATCATCAGAGGTGCCCAGAGTGGCCAATTGGAATCTCGTCAACCAAAACTGGAAATTTTCTACCGTCAAGGCTATTTCTGATAATGCAGTGATACAGTTGTAAACACACCATAC	239	chr5	13996115	13996353	-	none	none	1.07207	12.7234	6.88104e-05	2.58138	0	0	0	0	4.40779	0	4.16878	0	8.52261	3.78047	10.3576	4.68339	5.83132	10.7971	13.0661	27.5587	7.56219	5.51236	15.5393	50.131	24.2618	0	13.401	2.56953
80326	GCCTTAGAGAATCAAGAGGGCAAGATTGCAAGGGATGGAGGCTTCCCTGTGCTCTCTTCTCTCTGGTTCCAATGAGGAGGGGACCTTGTCCTATGGAGTGGACTGTGATTTGCAGGTGTATGAATGACAGTGTCCACAGGAGAGCCAAGTATGACGAAGAAGGACTCAGGATGTCAAGAAGTGCTTCAGGGCAGACAGACTAAAAA	206	chr9	112973363	112973568	+	none	none	3.28222	12.947	6.98791e-05	1.82229	4.40455	7.24611	1.93165	0	1.76312	3.02496	5.00254	2.88486	17.0452	9.07314	11.3933	8.19593	11.6626	20.2445	24.39	3.62614	8.50746	4.40989	21.9379	15.8748	15.1636	8.38559	11.8244	15.4172
21204	AAAAAAAAAAATCCCGGAACATTACACAGGCATATAAATTTGAATCAGGAAAATATAAAATTAGCTGATTATTTTTATTCAGTAAAAGTGCCTTGGCACAGAACTAAAATTGATAACTTATGGTTTTAGCATGTAGATAAGTACATGAGAGTAAATCACATTTCTATATGAATAGAAATATCCACTTTATTCATGTATAGATTATAAAACTATACTAAACAAAAAGTAATCATTTACTATTACAAAAATTATTAAGAGCCATTACAAAAATTCTCTGCCTACTAATTT	288	JH636052.4	2020051	2020338	-	none	none	15.3559	36.9048	7.00552e-05	1.20435	4.40455	19.323	19.3165	15.512	21.1574	15.881	16.6751	10.5778	35.0374	59.7315	48.6805	39.8088	17.494	25.643	43.5535	37.7119	41.592	19.8445	31.9927	40.9404	44.48	33.5424	47.2977	23.1258
102630	ATGCAGATACAATTCTCTGAAATATGTAAGTCCTAGCAGACTTGTCTCTTTTTAAATGATTCTAGGACCCCAAAATATCATCACCACTGAAATTAAGATGTTGGCACTGGTACTAGAATCAATAAACACAATGCAGATGCTACTATGGTAGCATATTAAAAGAATTTGAAAAAGTTGAAAAAAGATTTTCATCTAGCAGAGCTTTGGAGAAGAGCAATTTATTGTATCACAGACCTCAAG	240	chr7	7578112	7578351	-	none	none	2.33429	23.1937	7.06579e-05	2.50657	0	0	2.89748	2.58533	4.40779	3.7812	5.00254	0	1.89391	18.1463	22.7866	2.3417	9.33011	4.0489	16.5503	56.5678	6.61691	13.2297	43.8758	74.3611	46.5018	4.1928	48.086	2.56953
91841	ACCATCGTAACTAAAAATTTAAAAAGTAAAACTACAACTCCACCACAAATTGCAAGACACATTCAAACTACAGAGCTTTTATATTCTAAGCATCAGCCTAAGAGTTAGATTGCAGACTACATACACTTATCTTCTATGTACACTCATATCTGGATAGAGATATAATGATTGGGACAATCAAATAGGGCCATCTCTAAAAAACCAGAATCTGAAAACATGACCTGCCTGCTTTGAGTTGAGTCTACACTCCTTTACCACTTGCA	263	chr2	193329328	193329590	+	none	none	1.22826	17.3047	7.39079e-05	2.66604	0	0	1.93165	1.72356	6.17091	0	0	0	8.52261	5.29266	35.2157	4.68339	0	26.9927	18.2925	0	17.9602	11.0247	10.9689	26.7366	3.03273	61.8437	14.1893	32.1191
66689	CATCAATCTAGTAGAATAAAATATTTGAGTTCTTAATTTCCTTTAATTAGGATAACCTTTTTCTTCAAGTGAAGAGAATGGTTTTATTACATAGTTTTCTTCGGAAAAGATAGGCTGTATTTTCTAGCAGTTACGAATTTGTTATGTATGATGATCTGGTTCTTGGAACATTCTTGAATCTAGTGTCTCTAAGGCAGGTGTGTACAGCAAGAAGTGAATAACACAGAAATCAATGATGAAAGCATTAGAAGACAATTGAGTCTGTCAGAACTGCA	275	chr7	97596482	97596756	-	none	none	5.15764	18.1739	7.43409e-05	1.6789	4.40455	10.8692	4.82914	4.30889	0	4.53744	7.50381	4.80811	25.5678	29.4877	16.5721	25.7587	20.9927	16.1956	16.5503	9.42796	8.50746	16.5371	16.4534	10.8617	11.12	40.8798	7.88295	17.9867
13032	GGTCTTGTTTTTCCTTTAGAATCTCAGATTCAGTGCTTCAGTCTTCAAAAAGGGAATAATTTACACGTAGGAAATTACTTCTGCTGAGTTCTTAAAATAAGAAGCTCTTTGACGGTTGTCTTTTGTGGTCCATCACAGCTGATGCGTCTGATGGTTTTGGTACCTGAGAAGCCAAGGTCTATATTTTCTCTAACCAATAAATAAAATAAATCTCACTTCCTCTTCAATTTTAGGATAAGTACAAAAATAAGGAACTCTAAGGTTTTTCTGGATTCTATTTGTTTAACCACTCTACTGAGGTATGACTGGC	310	chr13	95670012	95670321	-	none	none	4.14347	14.5759	7.59671e-05	1.64668	4.40455	0	3.86331	3.44711	5.28935	4.53744	5.8363	5.76973	13.2574	13.6097	19.6794	2.3417	11.6626	16.1956	24.39	10.1532	17.9602	24.2544	12.7971	19.2169	16.1745	4.1928	15.7659	11.5629
121277	AATCTGGCCTATGTGCACATCTGGGCACAGAACCTCCCCTTGAACTTGTGACACAGATTCCTTTGTTCACATGTTTTCCTGCTGACCTTCTCCCCACTATCGCCCTGTTCTCCCACCGCATTCCCCTTGCTGAGATAGTGAAAATAGTAATCTGTAGATACCAAGGGAACTCAGAGACCATGGCCGGTGCACATCCTCCGTACGCTGAGCGCTGGTCCCCTGGGCCCA	228	chr22	23880585	23880812	+	none	none	29.5521	180.335	7.89806e-05	2.19	16.15	55.5535	55.0521	2.58533	7.05246	84.6989	6.67005	8.65459	232.004	173.902	122.219	321.983	169.108	384.646	375.431	231.348	117.214	99.2224	245.887	14.2038	53.5782	58.6991	100.902	185.006
10783	AATGCCATAAATGCTCCACTTAAAAGATACAGCAAGGCAGAATGCATAAGAATCCACCAACCAAGTATCTCTTATCTTCAAGAGACTCACCAACACATAAGGACTCACATACATTTAAGGTAAAGGGGTGGAAAAAGATATTCCATGCAAATGAACACCAAAAGCGAGCAGGAATAGCTGTTCTTATATCAGACAAAACAGACTTGAAAGCAACAACCATTAAAAAAGACAGAGGGATATTATATAATGATAAAAGGACTAGTCCAAC	268	chr5	13970126	13970393	-	none	none	1.24127	11.5116	8.2432e-05	2.45677	0	0	1.93165	0	4.40779	0	1.66751	1.92324	5.68174	12.0975	5.17878	2.3417	5.83132	12.1467	9.58177	34.0857	10.398	3.30741	12.7971	40.1048	9.09818	4.1928	17.3425	0
21318	CCTGACCAGGCTCTGTCCTGGGCCAGCCCTTTACTCTGCCTGGCACTGAAAGATTTGCCTGTCAGGGGCCTGGCATGGTCCTGGTGCACCTTCCCTGTGTCTTTGAGGGCTTCCCCTTCCCTCCCCAACCATGTCAGGGGCCAGGATTCCACATCCTGGGTTTGCACAACAAAGAGATCTCTGCTTGGAATGACCCCCTCCCAAACACACACACACACACACACACACA	229	chr2	219865060	219865288	-	none	none	1.29395	9.71987	8.2995e-05	2.32764	0	2.41537	2.89748	0	3.52623	1.51248	0	0	25.5678	9.82923	3.10727	7.02509	4.66505	13.4963	22.6478	2.17568	3.78109	15.4346	10.9689	6.68414	13.1418	10.482	3.94147	2.56953
31870	GAAATGATAGTTCACATAATGGGCACATCTTTGAGATGTGGGAGGAAACTGGGAGTACCCAGTGAAAACCCATGTGGACCTGGGGAGAATGTGTAAAGGACACACAGGAAGTGGCCAGCTGGGAGTTGATTGTTTTTTCTTATCAACATTACAATGAAATGATACTGAACGAAATGACATTATTCAAGTACCTGCTGTAATAGTCAGACTCCTTCATATAAAATTCAAAGCCCTCTACACTCGGGCACTACATTGGACTTCCATCCTACACCTACATTCTAGCCACTGTACTACACATCATTTACCAAAGGCGCTGTATACTTCTGTGCTACCAAACATTTGCCAGTCTGGTTCCCTCTGCATTTCAAGATTACACACCCCTCATAATCCTGCAAAGCC…	431	chr10	43168555	43168985	-	none	none	0.503979	25.8969	8.48736e-05	2.9272	0	0	0	0	1.76312	2.26872	0	0	1.89391	0	5.17878	2.3417	0	12.1467	0	2.90091	18.9055	31.9717	85.9234	20.0524	90.9818	60.7955	26.0137	55.2449
51274	AAGTGAAATGAAGATGAGGAAAGACCGAGGGTGAGCTAGAGGGACAGCCATGTAGAGCCATGCGGGGTGGGACGGGTGAGTGGCCCTCAGAACCCTATCCCAAACACCCCTACAAAACCAGTTCCTTTGAGGAGCCAGATGAGTAAGAATACAATGAGTTAAGAGGAAATTCAGTACAATTTCATTATTCTTTAAAGCAATTAGCCTGTGGGTCTGCGATACGCCTACATAATCAAGAAAGGTGTCAGAAAATGTCAA	258	chr2	39952264	39952521	+	none	none	2.07291	25.6067	9.86991e-05	2.61195	5.87273	0	2.89748	0	1.76312	6.04992	0	0	60.6052	28.7316	65.2526	5.85424	23.3253	82.3276	33.9717	13.7793	28.3582	2.20494	0	5.0131	5.05455	5.241	6.30636	43.682
18975	GCAACAGGTCATGGAAAGTAAGAATTATTACTATCAAGGGGCTGATGGGCCAGAGGAGGGAAGGAATTAATTAGAGGAGCTAACAGACCAACAAACAAACAAACAAACGAACAAAAAACCCAGGTCCCAGGACAGGGAATCCTGATGGGGCGGAGGTGGTATCTCCGCAGTTACTGAGAGAGGGGCTGTGGTCAGTTTCTTCCCCTTGAAGATGTTTCTTCCCCTTGAAGATGAGAATGATGTTAATATCCACTATCTGGAGTTGTTCTGAAG	273	chr4	96080074	96080346	+	none	none	5.42409	22.2982	9.90812e-05	1.82434	4.40455	7.24611	1.93165	8.61778	7.93402	4.53744	5.8363	2.88486	10.4165	35.5365	12.4291	5.85424	16.3277	13.4963	22.6478	11.6036	21.7413	15.4346	10.9689	13.3683	30.3273	60.7955	59.1221	16.7019
94997	TCTGTAGATTACAAAGCATATATACCCATTAGAATAGTCTTAATTATAAATAATAAAAAGCAGTCAAAACTGGGTTAAAAATGAAAATGATTTATTGGCTTATATATCTCCAACTTCTAGTGGTAGGGAAAATATCAAGTGTAGTTTGACCGAGTTTCCCTCCCCATCTCTCTATGATTCTCTTTGTTATTCCTTCTGTAGATTGCTTTTGGAAATATG	219	chr2	193331231	193331449	+	none	none	0.791379	11.0409	0.000101828	2.62489	0	0	0	0	4.40779	0	0	1.92324	9.46957	3.02438	18.6436	0	0	9.44743	14.8082	2.90091	10.398	5.51236	10.0549	15.0393	2.02182	30.3978	10.2478	34.6886
18096	CTTATTTACAAGAGAGAGCATTCTAAGACTCTCAAAATGTAAAATACTATACATTTTGAAGACAGTTTCTTTGTATGCAATATGAGTAGGATTATGATGAAAACACACAGAGTCTGCAGTGCCCCATAAAAGGGCACTAGTGAATGTGATCAAGGCCAAACTATATAGGACTCTGAATGGGACAGAAAGCCCAGCCTCAGGTCATATTTCACAGTCAGTCTCACACAGCTTCTAAGTTAAATCAAAGTGTTTATGATAGTTATAAGGTCAGAATTGTACCTAAGTTGGGCCAAGAGGACATTTCTTAAGCTTGCTCTCCCAAACCATTGATTTATTGGTCTATTTATTTAACATCCTCTGAATGCCCATGGGGTTCTGCAGCCCTGTGCCAGATGCTGA…	578	chr11	12382494	12383071	+	none	none	3.34292	28.217	0.000104801	2.41263	7.34091	2.41537	2.89748	3.44711	3.52623	3.7812	3.33503	0	80.4913	15.1219	16.5721	4.68339	4.66505	20.2445	13.9371	7.97751	7.56219	33.0741	148.995	40.9404	12.1309	2.0964	3.15318	39.8277
50120	GTGGTGTAGCTTTTAAATTAAGCCTTTGTGATATTTGATTATACGCCAATCTTTGATGACAGAAACGATGTCATTTATCTTAATATTCCCAGCGCAAGAGAAAACCGATAATCAAAATATTTGTTCAATTAAGTAGAGTAAAAATCAGCGGGAATAAGATAGGAAAAATGAGACCGAAATAACAGAACATCTATTATTGGATGCTAAAACTTTTACAGGATTTACTGCAGGAGGACTGCAAAGGGAAAGAAACTTCAACGGAGCAGTTTTTCAGATGGGCTGTCAACAAACCACAATTTGGAAGCAGCAGCAGAAAGCTGCGGCGTTGTCTTAGAAAGGTGATCGGCGTTCCTTAGAAATGAAAACTGGTCAGGTAACAGGTTTGAGCCCCTCGAGTCA…	476	chr2	37194228	37194703	-	none	none	3.55094	18.8248	0.000106673	2.03161	0	3.62305	2.89748	2.58533	6.17091	4.53744	6.67005	1.92324	14.2044	7.56095	13.4648	21.0753	44.318	9.44743	42.6824	5.0766	28.3582	46.3038	6.39855	3.34207	12.1309	20.964	7.88295	17.9867
45356	GTGACCTCAAAAATGTTTGCACAACATTCTTCTCCTAAGACACACTGAGCATCCTTTGGTAAATATTTTCGGTTTTCTGTTCACTCAGGCACATCTTTGTAAACACTGTTTTACAACTCTTGCTCTCCCCAGCTGAGTAAGCAATCCCCATTTTACTTAAGCTGGAAGTATGGTGGAAGGTGGTAAATGAGCATATGCAGATCAAAGTGAAGACCAGCAATCGTGAAACAAACCTATGGCCCAGTCCTCCTCTGTTTCCTGTACTGCATGATTTTCTTAACCCTCATATTGGCAGGTTAGTGCCACTAGTCC	312	chr5	14009698	14010009	-	none	none	3.45396	23.1751	0.000108584	2.24399	2.93637	0	1.93165	3.44711	6.17091	0	8.33757	4.80811	19.8861	6.04876	10.3576	3.51254	19.8265	29.6919	23.5189	61.6444	11.3433	15.4346	49.3602	72.69	17.1855	2.0964	20.4957	7.70859
27908	AGAAAAGATATTTCTAGAATATCTAGAAAGCAGTCAGAGAAAACGAACATGTTGCATATAGAGGGCCAACAATTTATAATGACAGCTGGCTTCTCCTCAGAAACTATGGAAATTAAAAGACAGTGAAATATGTCTTTATAAAGCACTGAAAGCAAAAACAAAAAAACTGTCAATGTAGAATTCTACATCCAGTAAATGTGTCCTCCAAAAAAACTTATTTGAAGACATTTTTAGATAAAAACTGAGAAATTTTTGTCAGTCAAAAATTTTTGTCACAGATATAAGGAAGGTATTTCACACTAAAGAAAATGATACTAGGAGGGAATTTAGATCTTCAGAAAC	342	chr8	128042754	128043095	+	none	none	2.74853	18.0969	0.000109075	2.21631	0	0	3.86331	0	5.28935	3.02496	5.00254	4.80811	19.8861	25.7072	43.5018	0	24.4915	8.0978	20.9057	26.8334	13.2338	5.51236	8.2267	38.4338	29.3164	9.43379	13.401	2.56953
119160	GGCATGGGCTCCACGTTGCCTTTTTCTAGTCATTATGGTTATCCATGCTCTCTTATTTGTTCTGGTGTAAGTCCAATAGCATACTAATTCAAGACCATCTGTTGGGATTAAGATTGTGGTGCATTGTTTCTCTGGGTGCAAAACTAATTGTCTTTTATAGATTGATGAAACTGAAGATTTTATTTTGCATAATCTTCCCAATTAATTTAGTGCTGATTTTCACGCTTGAGAATGAGAGGTGGCAAATCTTTGGTTTGAGTTACCCTATTTAATGTTGGAGAATGAAAGGGAATGGATGACTAAGTTGGACTCCAACCTCCCACCAACTTTAATCAAAACAGCTCCAAGGCAGGAGGGCTTTAGTCCATTTCCCCCATCTAGGAATCACCTGTTTGCTTC…	844	chr7	7577121	7577964	-	none	none	2.78708	27.8879	0.000110425	2.5028	5.87273	0	3.86331	0	5.28935	2.26872	5.00254	0	6.6287	14.3658	39.3587	2.3417	11.6626	2.69927	13.9371	65.9958	7.56219	23.1519	43.8758	93.578	66.72	2.0964	49.6626	2.56953
57936	CAGAAGGGAACATTAGAGCCAATTTTGTCTTCTGACAGATGGGTAAACTGAGGCCCAGAGAGGGCCATGACTTGGAGAAGATTCAAGGTGCCAGTGAAAGGCAGAGCTGAGCTAGGATCCATTCAGTGCCTGACAGCAGCCCAGGCCCTGCAGGGTCTTTGGTTACCTTAAATAGCTTAATACACAGACTTTTCTACCACAGGTTGAGCTTGAGAGGGG	219	chr20	56291191	56291409	+	none	none	3.01668	14.1917	0.000113819	1.92226	0	2.41537	0	6.03245	2.64467	2.26872	5.00254	5.76973	17.9922	28.7316	7.25029	3.51254	27.9903	5.39853	6.96856	18.1307	5.67164	16.5371	8.2267	8.35517	16.1745	28.3014	14.9776	12.8476
34981	TTTTTGATGTTTTCCTGGCCCTGTCAATTTTATTCCCGGCTTGCCTTATTCACCAACACCACAAGACACTATCAGCTCAGACCCAGAAACAGGATGCCAACATTGCAGAATCCATTTAGACATGGTAACGTCTAGTCTGAGGCTTACAGGGGACTGTGACTAAATTTATTTTAAAGCTTAAATGGAGGGAAAGGTTTCTCTGCCTGTCTGACACTTGGTTTCATTACTCAGCCTCTTTCCTAGTGATAGAGATTTTGTTCACTGTCCCTTGAAAGATATCAATCACCTGAGCTCACCTGTTCCCAGTAGCTGTACTTTTGATCAGTGGCTCCAGAATGAATCATCTGAAAATTTCTGCTGCATTAAGCAGAGCCCCTTTCAAGTAGCC	388	chr8	128066026	128066413	+	none	none	0.962514	10.0319	0.000116854	2.4829	0	0	0	0	1.76312	1.51248	2.50127	1.92324	21.78	14.3658	23.8224	3.51254	5.83132	4.0489	13.9371	19.5812	0	2.20494	6.39855	22.559	14.1527	2.0964	2.36488	3.85429
75598	GAAGGGTGTAGGCCTTGAGATGAAGAATGGTCTGGCCCATGCAGGTGGCCCAACCTAGTCATATAAGGCCTTAAAAGTGGAGGAACCTTTCTTAGCTGGGTCAGAGACAGACGAAACAAGGAAAAGGATCAGAGAAAGGCAACGTGATAAGGACCCACTGGGCATTACTGGCTCTGACAAAAACAGGGGCCATGAGAAAAGG	202	chr20	56335088	56335289	-	none	none	1.86603	16.511	0.000129156	2.4207	4.40455	0	0	2.58533	2.64467	5.29368	0	0	57.7644	35.5365	6.21454	8.19593	2.33253	20.2445	42.6824	2.90091	21.7413	2.20494	14.6253	3.34207	15.1636	15.723	3.94147	11.5629
97402	TCTTGAAGACAGAAGGCAGTTAATTCTTGTCTTTTTATCCCGCCTGCCACTCTGTGTCTTTTAAGTGGGGTGTTTAATCCATTTAAACTCAAGGTTAGTATTGATATGTGAGATTTTGATCCTTTCATCATGTTGTTAGCTGAGTGTGATGTAGACTTGAACATGTAGTTGCTTTACAGTGTCTGCGGGCTATGTGCTTAAGTGTGTTTTTGGAGTAGCAGGTGTCATTTTTCAATTTCACGTTCAGCATTTCCTTAAGGACCTCTTGTAAGGCTGGTCTAATGGAAACAAATGTCCTCAGTATTTGCTTTTCTGAGAAGAATTTTATT	329	chr5	34143808	34144136	-	none	none	4.40928	17.1724	0.000131511	1.73968	2.93637	0	3.86331	12.0649	4.40779	3.02496	4.16878	4.80811	11.3635	26.4633	52.8236	14.0502	11.6626	13.4963	13.0661	10.8784	16.0696	5.51236	12.7971	27.5721	15.1636	15.723	16.5542	11.5629
16301	TCAGACCGCAACCCCAGCCAACAAGGTAGCTACAAACTCTTGAGAAGCCTTGAGACAGAGGTACTCAATAGAGCCATTCCTATGAGAAACGTAAGTATCTGCTGTTTTACACCGCTAAGGTTTTAGCTAATGTATTATGCCATAATAGATAAGTTATATACAACCTTTATCAAATAATAAAAGTAACCATCATCAGTAATGAGACAAATCAAAAACCATGGCCCACCCAACAGAACATAATGAGGAGAGTACAGAATTGCTTCTGGGATATTTCTGACAAAGATGTATATGCTTCATTCATACATGAG	308	chr5	69275569	69275876	+	none	none	31.1536	88.9498	0.000133791	1.41812	23.4909	21.7383	34.7698	51.7067	48.4857	19.6622	29.1815	20.194	56.8174	100.561	204.044	76.1051	41.9855	75.5795	148.082	45.6894	156.915	39.689	58.501	96.0845	69.7527	67.0847	128.492	57.8144
111196	TCTTTACCTACAACCCAAGCCTGACGTCCCTCGGTTTTAAATAGCAGGGGGAGGGGAATCAATGTTTGATTCAGGTGTTTCGAAGACCATGCCACAGGCGATGAGCAGAACTCTTCATGTTGAAACGGTTCTGCTACAGTACTAGATTGCTCTCAGGCGATTTGGGGTTGATACAGGCAAGCCGGTGCAAAACTGGAATACTGGATATGAAGTGAAATGTATAAAAGACATAAAATGTCACAAAATAGTTTGATCACAAGTGTTGATTTTCCTGGTGAGTTGGGGCTGCGTGTTTCCATGTTTTCTGAAGGTTCACATAAA	321	JH636052.4	2029656	2029976	-	none	none	7.96429	25.5813	0.000139342	1.54665	0	15.6999	11.5899	7.756	4.40779	9.83112	12.5064	1.92324	27.4618	37.0486	49.7163	18.7336	12.8289	17.5452	30.4875	19.5812	24.5771	7.7173	29.2505	35.9273	24.2618	19.9158	36.2616	17.9867
61054	CAACAATTACTTTTATAACCAATAATTCCATGATTTTGCTTGGGTAATCCCTTTTAATGGTGACTGAAATCATGACTGACCGAGTCAGTGGCTAGAAAAGGGGCTTTGCCTTTGTAACTTTTGACGACCATGACTCCGTCGTTAAGATTGTCATTCAGAAATACCATACTGTGAATGACCACAACTGTGAAGTTAGGAAAGCCCTGTCAAAGCAAGAGATGGC	223	JH591181.2	686909	687131	+	none	none	3.15593	13.9772	0.000144796	1.8555	0	3.62305	4.82914	0	7.93402	3.02496	5.8363	0	8.52261	9.07314	12.4291	25.7587	5.83132	21.5941	17.4214	7.25228	8.50746	16.5371	24.6801	14.2038	27.2946	9.43379	8.67124	6.42382
34584	CCATGTTTAAGAGTTGGCTCATGGAGTTTGGGGTCCCATTCCTGCCTTTTGTAACTTCCTCCTAATGTCAAGGATAGATTGAGTAATACAACGCATGCCTAGAAGAGCCCACCCTTCCGGGTTGTCTGGGTCTACATTAGTATATTTCCTGAGTGCCTCAACCAAGCAGCCCTAAAACAGAATGGGATTTTCATCCTTCCACTGAGTTACTTCTCTATCCTTGTCATAATTAACTGGCTTAATCACACACCTTTTCATACTTTCTATTAAACAAGTTAGCAT	282	JH636052.4	2000386	2000667	-	none	none	4.1139	13.339	0.000151154	1.56454	2.93637	3.62305	5.79496	7.756	2.64467	2.26872	5.00254	2.88486	23.6739	20.4146	22.7866	9.36678	10.4964	9.44743	9.58177	13.0541	17.0149	13.2297	8.2267	9.19069	13.1418	14.6748	16.5542	2.56953
36959	TTCTTGTTTTTAACATATCAACACAAACCAAAGTATTCTGTATGCTCCATTGATACCATCTCATTGTTGTTTGGATAGGCAAGATAAACATGTCTTAAGTTTTTAAAGGTTACAGAAGGGTTGAAAATGATGGAATCCAATCACTGATTCAAAATGTGTGTTTACTAGGTAGTATTTAAGAATGAATGCATATAATAATTATTGTTATTTTTAATTT	217	chr5	34163817	34164033	-	none	none	14.9116	48.0324	0.000162621	1.55309	14.6818	9.66148	11.5899	18.9591	15.868	18.906	20.0102	9.61621	29.3557	72.5851	150.185	30.442	41.9855	36.4401	35.7139	31.1848	75.6219	12.1272	35.6491	80.2097	33.36	28.3014	49.6626	25.6953
64114	TTAATGACCTCCCCTCCCAACTTAGCACCTTTGGAAACACCGTCCAGCAGGGTCATTTTCTTCCTCAGGTTGGGGTTAATTGGGGCTGTCAACTTTCACAGGTTAGCAACTTTGGATTTCATTTTTTTTGTCTTGTTTTACTTTTAAACACTAGTAAGAGCCAATGTTTATTGGGCACTGCCCATGTGCCATGCCAGGCCCTGTTCTAACCACTTCACATTCTTCCACTTAGTCATTCCACAAATATGCATTGGGATCCTACGGAGAGCCAGAAATGAGCTCACTGGATCC	291	chr20	56289403	56289693	+	none	none	2.54867	12.8368	0.000177533	1.97021	0	0	4.82914	6.03245	0	1.51248	4.16878	3.84649	11.3635	17.3902	8.28605	3.51254	11.6626	5.39853	15.6793	24.6578	10.398	4.40989	11.883	5.84862	19.2073	37.7352	10.2478	7.70859
86488	GCGGTAGCAGTCATCAGGGAAAAATATAAAACCTCATTTTGTGTTTATGTGTTAACAAGTTGAGCAAGTTGAGACTCCTCAAAAACGTGGTTACATTTATGTTACAGTCTATAATTATATATTTTGTGTGCTTTGTCTATAGGTTGAACCCCCAAAATTGTAAATTGACAGCTCATATAATCATAGCAAATTCTGCTTCATGGCCATATAGTCTGTTCCATTTCATTTTCTCTTTTGCA	239	chrX	93841865	93842103	-	none	none	1.04928	12.6496	0.000187747	2.55251	2.93637	0	1.93165	0	3.52623	0	0	0	0	15.878	18.6436	2.3417	16.3277	5.39853	12.195	5.0766	10.398	13.2297	28.3364	47.6245	21.2291	3.1446	0	2.56953
44073	GAAACTGAACACACTAGGGTACAAGAGAAGGAATGCTTCTCGCTGGTGGTCTTCTTAGACTCAAAGAGAGAAGTATCTCTCCCTCTCCCCAGGAACTCTACAGAGCAAGGACAAAACCACTTCTGACTTAGAGGGAGGGCTGAATGCAGTGACCCTATTTACCAAATCCCAAACTGGGTCATGAATTTTTTTAATGACATTTCAGTTTGAAAAGAAAGCTGGAAGATGGAGTTTGTGTGCTGACATGTTGGAATTCCTGGGGC	263	chr11	12380954	12381216	+	none	none	2.79329	21.9659	0.000207436	2.3371	5.87273	3.62305	1.93165	2.58533	0	3.7812	1.66751	2.88486	38.8252	10.5853	15.5363	2.3417	2.33253	10.7971	18.2925	12.3289	6.61691	36.3816	137.112	32.5852	11.12	5.241	2.36488	8.99335
70193	CCCCTCCTCCTTTCCTTTATGTGTTTCCTGATAAGCCAATCTGTGTACTGCTTTCCCTGCACTGTCTGTACAGTTGGAAGCATTATTCAAATGAGTCCTGTGAAACTGATGGCCTGTGGCCCCGGTTGTTAAACACCGACACGCTGCTCATTAACACTCAGCATCCGGATATCCTAATTTCAGCTCAGATTTTGGTAAATATATATTTTCTTGATCATTTCCAACTACCATGCAAAGCCACATCCTGTCCTCTCTGAGATGCTTAGAAGAGTGTAT	276	chr21	38012222	38012497	-	none	none	3.86779	18.2022	0.000222147	1.93079	2.93637	3.62305	9.65827	1.72356	4.40779	0	6.67005	1.92324	17.9922	6.80485	15.5363	22.2461	8.16385	14.846	18.2925	18.8559	9.45273	27.5618	31.9927	4.17759	22.24	14.6748	3.15318	55.2449
19387	ACATGGGGTGAGTTAGCCACTATGTATGGTTTTTAGCATGGCAGAAGAGTGAATCAGTGCCACATAGTGTAGCTAACACTTCAACAGAAAATATACAGTCTTTCTGACAATATGACACAGTTCAGGGCAACCAAACCCACTGGAAAGTGAGTAGGTAAAGGATTTCTGGAAACAAGACAGGCAGAGAGAGTGAGTCAAAAATGTTAGCTGGTGGCTGAGTATGTTTGTATGAGGCAGACTCAAAACAACACGGATTAAAATAAAAGCACTAAACAACATTGCATTCAAGAAACAGGCTTTGTAGCTTTAGTACGACTAAGTTAATTTACGGTTCAAACGAAAACATTAACATATTTGAAGGAATACCACAGAATTTAGAGTTCAGAACATGGCTCAACA…	661	chr8	128041803	128042463	+	none	none	4.61269	21.6867	0.000231186	1.92575	0	6.03842	9.65827	4.30889	7.93402	4.53744	2.50127	1.92324	17.9922	24.195	53.8593	5.85424	11.6626	13.4963	20.0346	27.5587	17.9602	15.4346	8.2267	76.8676	29.3164	9.43379	8.67124	6.42382
43759	AATGAAACACATCCCAAGAAACTCTGTTTATGGTGCAGGAAGGGTTTAGTGACTTTACTGCTCAGATTACCATTTGGATATCAGTTTCATCATCGTCAACCTCCAATTTCCTGTTTTGCTTATCTTAGAATGACTCTTTTAAAAAATGTTTGCACTGCTCAGATGGCTTTGGCTTCAAGTTGATTAGATATGGAACTGGTTTATAATGGATTAGAATGCAGGATTTGTTTGCTTTGTAATATTTTAAGAAAGCAATGAAAGAAGCGGCAATGACAGGGAGAGATATTGTATACTTACAGTCTGATTCTTTTTTCATTACCGGAAAAGACAACTAATTTAGGAATGTGGATTATGGCCCTTGGTCCCTTTTTGATTTGTGTTTCACTTCAGGGTTTTCCT…	480	chr21	38012527	38013005	-	none	none	2.30702	16.8682	0.000246355	2.24475	0	2.41537	0	1.72356	2.64467	0	11.6726	0	17.0452	3.78047	16.5721	10.5376	8.16385	22.9438	11.3239	14.5046	6.61691	25.3568	27.4223	5.84862	26.2836	11.5302	1.57659	60.3839
97480	GCCTGAGTCCCTGGGAAGAATGCCACAAGTCAGAGGCAAAAAAAAAAAGGTTTTGTTCACTCATTGAACAAACATTCTGCTCCTATTCAGTGTGAAGCTCTGTGCTGGGTATGGGGCACAGGGCTGGGAAGAAAACCAACTCCCTGACCTCGTGTGACATTGTGGGGGACAAAGGGACTAAAGACACACACACACATGCAAACTCATAGCTCAATGAGGTCAGGAGGTCATTTCAGACATGGTGATAACAGGCCAAAGGCCAGAGTTGGGGT	272	chr20	56288065	56288336	+	none	none	6.07667	22.394	0.000251529	1.683	4.40455	0	6.76079	13.7885	6.17091	4.53744	3.33503	9.61621	45.4539	34.0243	8.28605	7.02509	23.3253	8.0978	18.2925	40.6128	24.5771	20.947	17.3675	6.68414	25.2727	31.446	17.3425	29.5496
93171	AATGTGCTTGGAAGAGTGCCTGGGACATAGTAAGTGCTATTGTTTTATCAGTTTTAACTTTCAACCCTGGTAGATCTGCTGCTAGTTTGAAATAGCAATCGTATAACTATGTATGGAGCCTAAAACTTTCAACATTTTCTATCAGTACTATTCACCATCTTGATCATAGAATTAGAGAATTTTTGTTTACTTTGCCAGTTGATAAGATAACCAAGGTTCTTTTTTCTTTAAATGCCACCAAATCCAGTATATGACTACCAAAATTTGTATAAAATCTGATATAAACCAAATAGACATGATAGATGTTTATTTGGTTTATAAAGTGATAATTGTGTATGTAGAATATTTTACTCCTTTAAACTGAAATATCCA	372	chr8	82603777	82604148	-	none	none	2.29292	18.6054	0.000263227	2.30989	0	0	1.93165	4.30889	7.93402	0	4.16878	0	4.73478	3.02438	15.5363	2.3417	9.33011	25.643	6.96856	29.0091	26.4676	44.0989	24.6801	48.46	29.3164	14.6748	13.401	0
89425	ACTACAAAGACAACTAAAAGCTGAAGGAGTGTCATCTTTTCAGTTTTGTTGGTTGCCTGAGATAAGCTTGTTGTTAAGAAACACATCGGTTTAGATGCTAGTTATTTACCACCCTTTGATGGCTCTGACTTAGTTTGGAGAAATTAATCAGTAGAACTTGGTATTGGATGATCATCCATGGAGACCAGAATGAGATCCCTTTGTAAAATGAAGAATGAGATAAATGAAAAGGGATCAGTTGTTTTATGTTTACTGTGTTTATAGATGTTGACAACAAATTTATACAATTTAAACAAATTTATAATGGCTAAACAAATCTT	320	chr8	128040977	128041296	+	none	none	4.10859	19.1916	0.000264308	1.93385	5.87273	3.62305	5.79496	4.30889	4.40779	3.02496	5.8363	0	20.8331	21.9267	47.6448	7.02509	12.8289	2.69927	14.8082	27.5587	9.45273	9.92224	7.31263	58.4862	37.4036	12.5784	6.30636	10.2781
29049	AAAATATTTGCCATCTGTGTATCTGAGAAGGGACTAATATCCAGAATCTATAAGGACTTTAAATCAAGACAAAACAAATTACTTCACTAAAAAGTGGTCAGAGAACATGAATACACACTTTCTAAAGAAGATATACAAGCAACCAATGAACATATGAAAAATTCCCTGCATCACTATTGGAGACATGCAAATCGAAACCACAATGAGATA	210	chr2	123325817	123326026	+	none	none	1.23095	9.72157	0.000271773	2.32029	2.93637	0	2.89748	0	0	1.51248	2.50127	0	4.73478	21.9267	22.7866	0	4.66505	4.0489	13.9371	11.6036	17.9602	8.81977	10.0549	10.0262	17.1855	0	3.94147	3.85429
94502	CTTTTCTCTAGGGTGAAGGGACTCTCGAGTGTGGTCATTGAGGACAAGTCAACGAGAGATTCCCGAGTACGTCTACAGTGAGCCTTGTGGTAAGCTTGGGCGCTCGGAAGAAGCCAGGGTTAATGGGGCAAACTAAAAGTAAAGTCTCTCATTCCACCTGATGAGAAACACCCAGAGGTGTGGAGGGGCAGGCCACCCCTTCAGGGTAGGGTCCCCTCCATGCAGACCATAGAGCACAGGTGTGCCCCAAAGAGGAGCAGAGAGAAGGAGGGAGAGGGCCCACGAGAGACTTGGAAATGAATGGCAGGATTTTAGGCGCTGGACTTGGGTTCGGGGCACCTGGCCTTTCCTTGTGTATTTCTCCTACTGTCTGCCTAACTATTTAATACAATAAAAGAA…	582	chr22	23879235	23879816	+	none	none	7.04641	63.9086	0.000272067	2.38891	0	7.24611	6.76079	0	0	37.812	1.66751	2.88486	76.7035	90.7314	23.8224	49.1756	79.3059	161.956	128.918	52.2164	47.2637	28.6643	119.744	0	35.3818	17.8194	50.4509	60.3839
11418	CAAGCTTTGCAATTTACTAATCATCAATCTAAAACAAATTTCTGTAATATTTTAGCCCCTCTTCACTGATACATAAAGAGAACTTGCATATAAAAACAATAGAGGAATTCAAGATTCTATACATTTAAAATCTCAACTGTAGAAATGATTTTCTGCCATATCTAGTAATTCAGAGCTAGACAAAACCATTAATTTGATTATATACCTGCTATGGTTTGAATGTGTCCCCCAAAGTTTATGTGTTGGAAACCTAATTCTCAATGTAATGGTGTTGGGAGTTAGGGCCTAATAAGAGGTGATTAAATTATGAGAGTTCTGCCCTCATGAATGGACTAATATCATTTTCCTTGGAGTGGGTTAGTTA	364	chr5	34162442	34162805	-	none	none	10.4003	38.9629	0.000278541	1.69774	2.93637	6.03842	10.6241	19.8209	19.3943	9.83112	11.6726	2.88486	33.1435	47.634	132.577	39.8088	25.6578	25.643	40.9403	15.955	55.7711	6.61483	27.4223	53.4731	34.3709	26.205	40.203	17.9867
107472	ATTCAATAAGCAAGTGTGATGGCTATGAGGACAGATCTTAACAGGTTTTTTTTTCTGGAAGGCTTAAAATCATGCATTACTCAATCTAATACTTCACGAAATTTCAGTAAAACCTAATGATAATATAGAAGCTTGTGTTGTAGTTTTGTAATCAACAGCAAAACATAAAATTTAAAAAAAACATACATTACTGGGGCTGTATCCTGCTACAATAATAAGGCTGACATAATAGATGGAGAACAATATGGTAACAAGCCAAAATGTATTACTTCATCCACAAATAGTATCGTGCTATATATAGACAGACTTGTTAAAAATTTAAAGAAATACAC	332	chr8	128105087	128105418	+	none	none	1.60451	17.1501	0.000282581	2.45416	0	0	6.76079	0	4.40779	0	1.66751	0	111.741	34.7804	16.5721	3.51254	9.33011	14.846	8.7107	13.7793	4.72637	2.20494	2.74223	23.3945	9.09818	5.241	4.72977	8.99335
110788	TCCACCGTTTTGCTGTAATTTCTTTAACCACCTGCCAACTCACTAAGGGCATTTGCTTAGTGTTTAATGTTCGCCTCCCAAATCAGTCTTTTTAATTGAATAGGCTATTTTTTTCACATTTCATATTCAAGCTTAACTTCCCTTTTGTAATATAGGCAGATGTTAAGATCACGTCAGCACTGCTGTGCAAAGGTTTATGGTAGATATTATTTTATATCTTTGTTCCAC	228	chr5	34164075	34164302	-	none	none	4.79124	25.5588	0.000286571	2.01987	0	4.83074	0	14.6502	7.05246	3.7812	4.16878	3.84649	17.9922	34.0243	122.219	32.7837	8.16385	8.0978	12.195	15.955	32.1393	7.7173	23.766	31.7497	17.1855	14.6748	21.284	8.99335
41500	GAAGAAGATTACCTCATTTTAAATGTAGCTAATTAATTTTAAAAAGTATATCTCTGTTTTTAATGCAAATATTCCTGGAAGAAGAGGGTTTTGGTTGCTCACCTTATGGAACTGGGAGCAGTGACTAGGTCCCTTTCGATGATTCAGCAGATTCGTTTTCATATTATAAAACTTGTATGTCATCACATACTTGCATATCACATCATAATCACGTTAGCAATGATGTATCACACGTAAAAGTAGAATTTCTCATCCTCGGCACGCTTGACATTTGGGGTTGGTTAATTTTTTGTTGTGGGGCAGTTTAGCAGGATCCCTGCTCTCTGCCCACTGACTGATTGGTGGCACCTCCATGCCCAGTAGACACAATAAAAAATGTCTCCAGACATTGCCAAATCT…	835	chr3	169803235	169804069	+	none	none	21.5957	64.4496	0.000287869	1.45753	17.6182	19.323	27.0432	5.17067	35.2623	18.906	35.0178	14.4243	83.3322	33.2682	33.1442	62.0549	186.602	68.8313	54.0064	26.8334	51.99	98.1199	42.0476	63.4993	85.9273	57.6509	40.203	43.682
51884	CTTGATAATCTGCATTTATGCTGTAATTTAAACAAATACATTTTAAGTAGCTTTGGTGGGAATTCTTTGGTTTATCGTTTAAAATATCAACAAGACTATACCAAATATAACATTTAGTACATGAAAGTGAAGGGAGAATATTATTTGGCTTTCACCTACCAGGAGTAAGTGATTCTATGTTATTTATATCTGAAGGAGTGCTTTGATGTACTTATTTATGCAGCATTATATTAAAACTAAAACTAAAATTTCCCGTAATTTTATATTAGAT	271	chr2	42665489	42665759	-	none	none	0.512227	13.7912	0.000290346	2.69105	0	0	0	2.58533	0	1.51248	0	0	36.9313	8.31704	8.28605	21.0753	16.3277	67.4817	13.9371	0	28.3582	0	0	3.34207	2.02182	6.28919	3.15318	5.13906
15035	ACCTGCCCTGCTCTGTGACTTGCTTTTGACCACCAGCATGCTGCAGAAGTGATGCCGTGTGACTTCTGAGCGGGTCATAGGAAGCCTTGCAGTGTGGCCTGGGTCTTCAGGAATGCTTGTTTGAGGAAAACCACTGTCATGTAAGAAGTATGGCTACCCTGAGACTGTCATGGTGTGAGGACTCCTAAATGAGTCACATGTGGATGGCCACCTATTCAGGCCTCAGTTCTTCCAGCCATTGCGACTGTGGCCCACGCATGTGGGGGAAGAGGCCATTTTTCACGCCCATCCCAGTTGAGTCTTTAGATGAT	311	chr3	193567868	193568178	-	none	none	1.13661	24.9777	0.000308024	2.6651	2.93637	0	1.93165	1.72356	0	0	2.50127	0	66.287	6.04876	0	3.51254	8.16385	35.0905	98.4309	1.45046	19.8507	27.5618	103.291	5.0131	2.02182	0	2.36488	20.5562
53703	CCACTTCAGGGAGTCAGCCAATTACAACAATCCAACAGCTGTCCCGCGCCACAGCAGGCAGCACCGCAGTAGATTTATGTTCCACCCAAATGGTCTTTTTACTCCCTGGAAAGCCCCCACAAAAGATTCCTAGAGGGGTATATGGCCCGCTGCCAGAAGGGAGGGTAGGCCTTTGAGGGAGATCAAGTCTAAATTTGAAGGGAGTCCAAATTCATACTGGGGTAATTTATTCAGATTATAAAGGGGGAATTCAGTTAGTGATCAGCTCCACTGTTCCCCGGAGTGCCAATCCAGGTGATAGAATTGCTCAATTACTGCTTTTGCCTTATGTTAAAATTGGGGAAAACAAAAAGGAAAGAACAGGAGGGTTTGGAAGTACCAACCCTGCAGGAAAAGCTG…	766	chr22	23883138	23883903	+	none	none	139.013	860.87	0.000311498	2.14901	79.2819	165.453	356.39	39.6418	20.2758	365.264	42.5216	43.273	382.571	700.144	946.681	873.452	1618.77	3509.05	1965.13	795.575	372.438	288.847	845.522	31.7497	168.822	445.485	498.202	331.469
100357	TAACAAAATCAATCTTTCAGAGTAATGATTCTCATTATGGAGTCATTTGATGATTAAGACCAGTTGGCATAGGAAGAAATTGTGATTTAGAAATTATGTGATAATTATGAATTGGTCTTAAGCTACAGTGTTCATTGATCACTTTTTCAAATTACGAATGGATTCTATTACTTTTTATATGACCAGATTACATTAATACTAG	202	GL000214.1	53152	53353	-	none	none	1.77898	17.343	0.000315155	2.40636	0	3.62305	1.93165	6.03245	2.64467	0	0	0	2.84087	14.3658	45.5733	77.276	5.83132	21.5941	0	1.45046	14.1791	20.947	27.4223	12.5328	4.04364	10.482	8.67124	10.2781
97141	TACACTATTTTAAATTTTCAAAATTAGGTCATGTAAATGTTGTGTCATATTTCCAATTCATAAGTAGTATACTTATGAATACTGAATAGTGAACATAGGGTACATTTATATCCTACTGATTGCTTAGCTGTGGACCAGAGGTAAACAGAGAATGAATGGTATTTTCACAGGTTAGTAAACTGTTTTTCTATGATCTCTTATATACAAGTGTGATGAACATTTTTTCCCCCTTCCTGAACTAATATAGGAACATATGGTCTAATAAGTGTGAGTTCATTTGGGGAGGGCAGGATAG	295	JH636052.4	2015325	2015619	-	none	none	17.0291	35.8114	0.000316814	1.04256	19.0864	14.4922	16.4191	26.7151	14.9865	12.8561	19.1764	12.5011	33.1435	40.073	46.609	22.2461	22.159	37.7897	43.5535	30.4596	46.3184	26.4593	25.5942	42.6114	48.5236	32.4942	54.3924	20.5562
70145	AAAAAATAGAAATAAGAAAAGACACATTAAAAGCATTAAATGAGTTTCAAAAGTTGCTAGGAGATACTAATTGGATTTGGAGATATTAATTGGATTTGGCCAACTCTAGGCATTCCTACTTATGCCATGTCAAATTTGTTCTCTTTCTTAAGAGGGGACTCGGAATTAAATAGTGAAAGAACGTTAACTCCAGAGGCAACTAAAGAAATTAAATTAATTGAAGAAAAAATTCGG	234	chr22	23884601	23884834	+	none	none	118.305	727.734	0.000321801	2.14087	57.2591	236.706	262.705	45.6742	15.868	268.465	36.6853	23.0789	407.191	567.827	787.175	1629.82	1271.23	2525.16	1403.29	536.669	330.846	255.773	722.122	21.7235	166.8	377.352	379.958	260.807
49425	TGTGTACACCGCCTGTGTCATTATTCATAATATCCTAGGGAGATGTTTCTTTTAATGTCACAAAGAGTGTACAAAATGTCACAGAAGGTGTACAGCTTGTGACATTATCTGTAATACCCTAGAAGGATGTTACTCCTAATATGTCACAGGGGTGTACACCCTTTGATATTATTTGTAATCTCATAGAGAGATATTACTTCAAATATCACAGTGGATGTACACACATAGTGTATACCCTGTGATATTATTCATAATATCCTAGGGAGA	267	chr12	52502380	52502646	-	none	none	2.74579	12.2585	0.000339981	1.863	2.93637	0	2.89748	1.72356	4.40779	3.7812	3.33503	2.88486	7.57566	21.9267	6.21454	7.02509	13.9952	12.1467	32.2296	21.0316	10.398	3.30741	19.1956	5.0131	8.08727	4.1928	7.09465	16.7019
26269	CACAATGCGTGTACACCTTGTGATATTATTCATAATATCCTAATATCACAGGGGGTGTGTTCCCTGTGATATTATTCCTAATATCCTAGACGGATATTGTTCCTAACATCACAGGCTGTGTACCCCTTGTCATATCATTCATAATATCCTAAAACTACGTTATTCCTCATGTCACAGGGGGTGTTCACCCTGTGATATTATTCGTAATAGTTTTATGGGATGTTACTCCTAATGCCACACGGGGTGTACACAGAGTCACACAGTGATATGACCTG	275	chr12	52503167	52503441	-	none	none	18.087	51.4016	0.000366096	1.42391	38.1728	26.5691	7.72662	13.7885	14.9865	19.6622	14.1739	9.61621	46.4009	75.6095	49.7163	40.9797	51.3156	48.5868	87.9781	70.3471	48.2089	39.689	74.0403	77.7031	18.1964	15.723	14.9776	62.9535
32576	TATTGCTGTTTACATTAGCATCAAAATAAATGAAATATTTAGCTATAAATCTATCAAAATATGTATAAGGTCTATATGAAGAGCAAAAACTCTGATGAAAGGTATCAAAGAAGAACTAAATAAATGAAGAGATAATCCATGTTCATGAAGAGGAGAACTCAATATTGTCAAGATGTCAGTGCGTCCCAGCTTGTTCTAATGCAATTCCAATCAAAATCCCAGGAAGTTATTTTGTGGATATCAACAAAGTAATTTGAAACTTCCTATGAAAAAACAAACGACTCAGAATAGCAAACCCAATATCGAAGGGAAAGAATAGAGCAAGAGGACTGAAATCACTTGAGTTCAAGACTTACTATGAAGCCACAGTGATCAAGACAATGTGGTATTGGCCAAAAA…	409	chr8	128044468	128044876	+	none	none	2.86206	11.4193	0.000367675	1.7517	0	3.62305	5.79496	2.58533	5.28935	2.26872	3.33503	0	8.52261	10.5853	18.6436	4.68339	9.33011	5.39853	16.5503	17.4055	8.50746	5.51236	9.14078	26.7366	18.1964	13.6266	4.72977	5.13906
75572	CTCCCTAAGATGATAAAAAAATCAAAGGGTGGACCCTGTCTGTGACATCAAAAGTAACATCTCTGTGGCTATTCCGAATAGCATCACAGGGTGTACACAGCCTGTGACGTTAGGAGTAGCATCCCCATAAGATATTCCGAGTAATATCACAGGGTGTACACCCCATGTGACATTAAGAGCAACATCTTCTTAGGATATTACGAACAACCTCACAGGGTGTACGCCCCCTGTGACTTTAAAAGTAACATCCCCCT	254	chr7	97593360	97593613	-	none	none	6.1153	19.1539	0.00038198	1.47978	0	7.24611	7.72662	3.44711	7.05246	12.0998	7.50381	3.84649	11.3635	26.4633	25.8939	14.0502	11.6626	10.7971	17.4214	15.2298	31.194	7.7173	26.5083	20.0524	19.2073	33.5424	7.09465	28.2648
49383	TGGTATGTTGTCAAAGAAGGTTTAGAAGTTCAATTTAAATAATACTGAAGATACCTGCTATTGTATAAGCAATGAAAATGCTATACAGATGTTCTGAAATAAAACAAACACACCCATACTCTGACCACTGAACTTTGGACCAGTATTGCTCTTCATTAGTATCCTAAAATGTATGGACATTTTATGGGTCATTGTTCCAAACCTGTCTTTGGAGCTATCTGGAGTAGCACAGAACCAACCTGTCTTTAGAGCTTCCTTGAGCAGCACAGAAAAGGGACTTTCAGAGCTTCAGGAGACAGTATTTCATCCAAGTGCAGCTTCTGGAAGTGAAATGTATTTAGAAGGTTTGCTCTGCT	356	chr4	188294843	188295198	-	none	none	5.9511	39.1483	0.00039367	2.16709	0	3.62305	6.76079	0	3.52623	9.07488	15.0076	9.61621	4.73478	53.6827	27.9654	5.85424	23.3253	82.3276	77.5253	10.8784	129.502	59.5335	52.1025	5.84862	16.1745	38.7834	4.72977	33.4039
109286	TGACCCTATCCTCAATGAGAGTATTCAATTGTGTGTGTGGTCAGTTGTACTATTTTCACTGTATATACATAACTACTGTTAACTGTCATCCTTAATGGCCATTGTATATGTCATGGAAGGATCAGATGTACTGTATCAACCAATGGGGAAGATAATGTGGATAGAAAAGATTGTATTATCATTTGGGATTTAAGGTAATAATTAT	205	chr2	42653496	42653700	-	none	none	0.661168	20.5262	0.000403686	2.68072	0	0	0	0	5.28935	0	0	0	40.7191	10.5853	12.4291	32.7837	24.4915	124.166	6.09749	0	50.0995	0	1.82816	4.17759	2.02182	6.28919	6.30636	6.42382
51951	CATCTGCCCCCTTCCGGCAATCAGTCACAGCCACTCTGCTCCCTCAAGCACCTGATCTTGTACCTACTTATTCTAAAGAAGAAAAGGACTTTCTCCAGGTAGAGGGAAGGACAAGTGATGGAGGAAGGATGGATTCGGTTACCAGATGGGAGAGTAGCTGTGCCACAGCTGCTAGGAGCTGCAGTTGTACTGGCTGTGCATGAAACCACCCATCTAGGTCAGAGTCACTGGAAAAGTTGTTAGGCTGGTATTTCTACATCTCGCATTTGTCAGCCCTTGCCAAAACGGTGACA	293	chr12	52510192	52510484	-	none	none	36.2402	84.3314	0.000406859	1.17271	71.941	31.3998	27.0432	37.9182	27.3283	38.5682	31.6828	24.0405	70.0748	103.585	65.2526	63.2258	113.128	89.0758	148.953	74.6985	82.2388	95.915	120.658	96.0845	24.2618	48.2172	47.2977	106.635
76481	TGTGTTCCAATAAAACTTTATTTACAAACCAAGCAATGGGCCAAATTTGGCCCACAGGCCATGGTTTGCCAACACCAGTCTTAGAGCATTAAATATAAAACTCTGATTAACTAGATATGTAGAGTTCTTCCATTTTAGTGACTATTGAGCTCAGCTGCTGTTGAGGCAGATTAGGAAGATGGACATAGGAAACTGGATTCAGAAAGGATGAGGACTGTTT	220	chr17	67543571	67543790	+	none	none	6.40696	20.9165	0.000415144	1.5254	0	4.83074	4.82914	10.3413	12.3418	7.5624	7.50381	3.84649	30.3026	12.8536	14.5006	11.7085	30.3229	18.8949	21.7768	21.7568	18.9055	19.8445	58.501	22.559	23.2509	11.5302	10.2478	7.70859
105494	CGTCTAAGAAGTGTGAGCACCCACAGCATGGAGTGTGCCAGATTGGACAACAGACATTTCCTAAGATTGAGTGACTTTAGGAGAGCAGGGAGTGCCTGGCTCAGGCAAGGTGGCACCTTTGGGGGTCCCAGGTGGCAGACAGAGCTTCGCCCAGGTCGAACTGTGCATGGGCCCAGGGTGCTGGCCAGAGGTGGGGCGGCTGGAGTTCACAGGCCAGGCAGCCAAGGGGTTGGTCTGGCAAGTGGTCTGCCACCATGGACCCAGGCCTCAGACCAAACAGGCTGCTAAAGACACGGGTCCTCAAATCATCTGCAGGCAGGGTCTGGCCTGGGCCCCAGGAGTCCACAGGCAGGGAGCGCCCTGGGGAAGAGCTGAGGATGCTGCATCAGAAAAGAGGTA…	425	chr21	38014262	38014686	-	none	none	4.00515	22.4625	0.00042629	2.04605	0	2.41537	11.5899	0	2.64467	0	12.5064	2.88486	17.0452	4.53657	26.9297	23.417	12.8289	28.3423	14.8082	16.6802	3.78109	44.0989	44.7898	14.2038	14.1527	31.446	7.09465	55.2449
29762	CTCTTGCCATATGATCTGCACACGCTGGTCCCCTTTCACCTTCTGCCATGAGTAGAAGCAGTCAATGGCCCTCACCAGAAGCAGATGCTGGTGTCATGCTTCTTGCATAGACTGCAGAATTGTAAGCCAAATAAACCTCTTTTCTTTATAGATTACTCAGCCTTAGGTATTCCTTTATAGCAACACAAAATGGACTAAGACAGTGTTCCTCTAATTACTGATGAAGGAGTTGAGAGAATGCCTAGGTCATATTCTGGGTCCAAGGATAATGAATCCCAGAAATTTCAGAGCTTTGGGGCAGGTGTTAGAAATTCTACTATATCAAGCTTTTCTACTGACAAAAAGAAGAAAGAGAAAGAAAGAAAGAAAAAGAAAAAAAGAAAGAAAGAAAGGAAAGGA…	621	chr7	7578344	7578964	-	none	none	2.11359	18.0052	0.000430285	2.31455	0	0	2.89748	6.89423	3.52623	0	1.66751	1.92324	4.73478	9.82923	24.8581	2.3417	10.4964	0	12.195	41.338	7.56219	7.7173	37.4772	63.4993	16.1745	3.1446	44.1445	2.56953
6662	CCGGAACCCGTAAAGATGTCTTTGATCGTAAAAGTGGGGAGGAGACCCTGATGGAAGAAGAGAAGACTTCAGCCTCACAATAGAAAAGACTGTGTTTATGCACCTAAATCTAACTTAGACACCATCTAATTCAAGAAACAGGCACATTTAGGGAAATAAAGAAAAGAGGCAGAAAGAGATGAAGCACCTTGGCTGAATCAGAGAAATTAGG	211	chr8	128076546	128076756	+	none	none	2.33753	15.1157	0.000461295	2.13712	0	0	5.79496	3.44711	5.28935	0	4.16878	0	5.68174	22.6828	50.752	3.51254	24.4915	9.44743	14.8082	22.4821	10.398	3.30741	4.57039	36.7628	15.1636	7.33739	7.88295	2.56953
119061	AAGGGATGGAGATTTTCCTAGAATCAAGGAGTCACCTCATTTCTGTCCTTTCTTGGTCTCTTCCGTTCATTGTCACAGTGATTGTCAACTGTCATGCACTGATGGGAGTGCTATTTAGCATGGAAATTGGATTATAATAAAGCTAGATGTTTGTCAGAGGTTGCGTAAGCTGCCATCAAGGATTTCACCAGCTTCAGCTGGTTTAGTCC	209	JH636052.4	2006963	2007171	-	none	none	4.43947	15.2684	0.000467992	1.58391	0	4.83074	2.89748	6.03245	5.28935	4.53744	10.0051	1.92324	11.3635	22.6828	12.4291	2.3417	2.33253	14.846	19.1635	20.3064	12.2886	11.0247	17.3675	15.8748	24.2618	22.0122	24.4371	11.5629
118374	GAGGCTTTTTCTCAGCAAAGGGCAGAGGCAAAGGAGAGAAGAAAGGAAGGGCCCTGTGCTGTGAAGCAATTTTCTCATTTTCTGCTGCTGGTGCTTGCGTTGTTGTCTTCCTCAACATGCAGGGGAGGCCCAGAGAGGCACTGCTACGGGTTCCAGACATTCCTTGTATTCTCACTGCCTGGCTCTGTCCTCAACCACTTACTTTCGGTGTTAGCGGTGAGTCTCAAAGGAACATTGTGCTGAACTGTTCTCCATCTCAACTACATGATCCTGCAGCCCTCAGGATGAAGGGTTTCGGTCTTTGATTCCGGCGACCTGGAGGCTTGCTTACTGTCAACTCCATGCGGAGAACTGTAGAAAACAGG	365	chr7	156263895	156264259	-	none	none	1.68527	12.4994	0.000473062	2.23486	0	4.83074	3.86331	0	1.76312	3.02496	0	0	21.78	13.6097	5.17878	28.1003	13.9952	22.9438	20.9057	6.52705	16.0696	12.1272	14.6253	5.84862	0	0	1.57659	16.7019
74314	ATCTTTGAAAATATCCCATTGTAGCAGGTGGGAAGGCACCATGAAGGAGGCAGATGCAGGTAAGTTTTTCACATTTCATGGCAGGAGGACAAGAGAAATGGTCTGATGGCTTCTACTTTCTTTGTGAAGGAAACACAGTCATCTACTGAGAGTGAGGGGAAAGGCAGGGAAGTCAGTGGTTTAAGAGAAGTGAAGAAGGTTTAAAATTGCACTGGAAAATTACAGCTTGATGGGGAAAGAGCCAGATGGTTACGGGCAACTCTGAGGGCCAGGTTAGGCTTCCTGAAGCTGACTGTGGCACAGTGGCCAAGCGTAGACTTGGGACTGCCAGGTGGCCTGTTGGTGTGAATCCAGCTTCCCTCACTCCCTCAGTTGTGTGACTGGGCACATTTTGACCTC…	426	chr4	96079658	96080083	+	none	none	6.32617	26.8624	0.000477706	1.81524	5.87273	2.41537	6.76079	7.756	2.64467	6.04992	13.3401	5.76973	19.8861	46.1218	15.5363	21.0753	11.6626	5.39853	26.1321	14.5046	24.5771	15.4346	11.883	11.6972	16.1745	87.0005	89.8656	12.8476
92077	ATCTCGAGAAAAGAGCCGCACTGATCCTGCAGTTCTTTATAGGCCGGAGGCCTGATCACCCTAGGCTCATGAATGAGCGCAGTGGCCATGGGGAAGGGCGCAACGGGAACCGAGACCCTGGGGACTGATTGGGCTGCATACTTGCGAGGTGGGCAACGTGTTCTGTTAACAACAGGGAACCCTCGTCCACAGGTGGCCACCCCTTGCTCTTGAGTCCCACCCAAAACCTCTAGTAGGGTTTTAATAACGCTCACCGTAAAGGTGTCTTCATAATTACTAGTGACAAGTTCTCTTGACTCTAGCAAGGTTCCCGTGTGGTCATCAAGTACAGAATGCAATTTCTTAATGATTTATCTGATATTAAAAGTATTTATGATCTC	380	chr1	228644683	228645062	-	none	none	32.297	110.976	0.000481001	1.61041	57.2591	16.9076	33.8039	6.89423	31.7361	58.2305	33.3503	20.194	147.725	37.0486	91.1465	72.5926	104.964	290.171	54.0064	29.0091	69.9502	131.194	111.518	108.617	204.204	141.507	25.2254	156.741
57538	CGGATACCTAAGGCATCACTCTTTTTGGATTAAAGATGTTTATTGGTCCTTGTGAGGTGTGAGAATTGAGTCCAGTCCAAATTACTCATCTCTAAGACATTTCATTTGAAATATATTGGTGACATTTTGTCTTTTGATTAAACAAACAGAAACAGTAACTTCCTAAGCAAAGAGCCAAATAACTAACTTACTTTCCTGGTCCAGTTGTAGCTAGGACATCTTATATCTGTGCAATGCTTTTTGCACTATGATGGTGTATGTACCACGATGTCGCTCTTTCTTTCTTTCTTTCTTTCTTTCTTT	303	chr8	82600900	82601202	-	none	none	2.54728	16.5904	0.00049818	2.14294	0	2.41537	2.89748	3.44711	0	3.02496	6.67005	1.92324	5.68174	3.02438	19.6794	2.3417	5.83132	9.44743	2.61321	31.91	24.5771	41.8939	22.852	35.9273	24.2618	25.1568	10.2478	0
89153	GTAACATCTATGTGTGAAGACATATGTCTTAAATGTATATTAGTAGTTAGAATTTCACAAATTCTAACTGTGCAAATAAAGTAGGGAAATGTCCATTTAGGTTTCTGTCACTCCCATAAATAGATTTATTTCTCATAATATAATTACATATTGGGAGAGTAATTAGTTAACCACATAGTATTAGACATGCTATTGCATTAACTGACC	207	chr5	34156585	34156791	-	none	none	3.0857	12.8923	0.000529706	1.76911	0	2.41537	4.82914	6.89423	1.76312	3.7812	5.00254	0	6.6287	14.3658	30.0369	14.0502	5.83132	12.1467	7.83963	13.7793	32.1393	9.92224	8.2267	20.8879	6.06546	8.38559	13.401	2.56953
75869	TGTTTAGAATGAAAAATGCTTTCATGGTTAAGCAAAAATGTATAAAAGGGCTTCTGAAGTAAATTTTTTTCTCTTATGTAGTTAAATAGATCATTTTGCCAGAAGTTCTGGGTGGACAGATCATAGGTAAAAGCAAGTGTGAAAGGATTTAAGTTTCCAACAAAATTACAGCACCCAAAGGATGGGGTATTTTTCATAAAGTTATTTCCTAAAGGAAGGGATAGTGC	227	chr10	115807157	115807383	+	none	none	3.021	14.0554	0.00053531	1.89177	4.40455	0	0	4.30889	3.52623	0	10.0051	1.92324	22.727	10.5853	6.21454	4.68339	12.8289	10.7971	33.1007	22.4821	13.2338	12.1272	5.48447	5.84862	24.2618	26.205	7.88295	6.42382
30368	ATGACTTTTACCAAACATACTGCCTGCAAACATATTGTTAACAAGGTACATCCTGCACAGCCCTAGATCCCTTAAACCTTACAGCACATGTTTCCGTGAGCACAGGGTTGGGGCTAAAGTTACAGATTAACAGCATCTCAAGGCAAAACAATTTTTCTTAGTACAGATCAAAATGGAGTTTCTTATGTCTTCCTTTTCTACATAGACACAGTGAAAGTCTGATCTCTCTTTTCCTTACATATCCC	245	chr22	23888763	23889007	-	none	none	0.56718	13.7507	0.00054187	2.59751	0	0	0	0	0	4.53744	0	0	6.6287	7.56095	4.14302	25.7587	33.8216	66.132	24.39	10.8784	3.78109	4.40989	20.1097	0	3.03273	3.1446	2.36488	3.85429
68445	ACAGCAAAAAATAAAAAGCCATCTGGCCTGTGTCCAAAATGTGGAAAAGCAAAACATTGGGCCAATCAATGTCATTCTAAATTTGATAAAGATGGGCAACCATTGTCTGGAAACAGGAAGAGGGGCCAGCCTCAGGCCCCCCAACAAACTGGGGCATTCCCAGTTAAACTGTTTGTTCCTCAGGGTTTTCAAGGACAACAACCCCTACAGAAAATACCACCACT	224	chr22	23882919	23883142	+	none	none	96.737	598.977	0.000557919	2.11961	42.5773	194.437	197.995	23.268	8.81558	257.878	25.8465	23.0789	357.95	504.315	556.201	1347.65	1055.47	2122.97	1208.17	395.249	237.264	210.572	609.69	16.7103	132.429	298.737	286.151	244.105
28450	CAAAAAGCCATATTTTTCTTCTTGCAGAGAGCCTATAAATGGACGTGCAAGTAGGAGAGATATTGCTAAATTCTTTTCCTAGCAAGGAATATAATACTAAGACCCTAGGGAAAGAATTGCATTCCTGGGGGGAGGTCTATAAACGGCCGCTCTGGGAGTGTCTGTCCTATGTGGTTGAGATAAGGACTGAGATACGCCCTGGTCTCCTGCAGTACCCTCAGGCTTACTAGGATTGGGAAACCCCAGTCCTGGTAAATTTGAGGTCAGGCCGGTTCTTTGCTCTGAACCCTGTTTTCTGTTAAGATGTTTATCAAGACAATACATGCACCGCTGAACATAGACCCTTATCAGGAGTTTCTGATTTTGCTCTGGTCCTGTTTCTTCAGA	387	chr22	23889422	23889808	+	none	none	80.2688	405.513	0.000563687	1.96413	44.0455	142.507	184.473	24.9916	17.6312	173.935	26.6802	27.887	233.898	256.316	321.084	768.076	885.194	1602.01	662.885	248.753	190.945	164.268	358.319	30.0786	229.476	203.351	198.65	134.9
8646	ATTAAAAGTAATATCTTACTAGGATATTACGAATAATATCACAGGGTATACAGCCCCTGTGACATGAGGAGTAATGTCTTTTTAGGATATCGCGAATAATATAACAAGATGTACACACCCTGTGACATTAGGTGTAACATCCGTCTAGGAGACTATGAATACTATCGCAGCGAACACACCCCCTGTGACAATAGGAGTAACATCCCCGTAGGATATTATGAATAATATCACAAGGTGTACACACATTGTGACTTCAGTGCTAATATCCCTCTCATATACTGTGACTATCACAGGGTGTGCACCCCTGTGATATGACATTAGGAGTAACATCTCCCTAGAGTATTATGAATACTA	354	chr21	44371234	44371587	-	none	none	3.93334	14.9442	0.000572655	1.67167	0	0	7.72662	3.44711	5.28935	3.7812	8.33757	2.88486	10.4165	19.6585	36.2515	19.9044	10.4964	8.0978	22.6478	18.8559	21.7413	9.92224	9.14078	22.559	11.12	4.1928	10.2478	3.85429
41074	ACACACACACACACACACACACACACATTCGTATATGCTAAGTACTCAATGAGTGGTGGAGATGATAATACAGAAGTTCAGAGGAAGGAGACAACTTTGCAACTGTGTTGGTTTGAGAATGTTTTATAGGCTATGATGTCAATATGATACTTTCAGTGGTCTCCTAAATGAGACAGAGCAATAGAAAACTTATTTAGTGATTATGATATATCCTAAGTATTAAAAGAAGGAACACCCAGATAGCAGACATTTGACAAATTCTCACTCGGTGAATGAATTTGTAAATTTCATTAGCACATCAAAATAAGTATGTTTTAAAGTAAATGTGGCATCTCTGCCCTCAGAGCTAAGCTTTCTCCTGTCTTCCATGTTAACCCACCAAAGGCATTACTGTTTACC…	490	chr8	82605256	82605745	-	none	none	4.08537	21.9384	0.00059545	2.00415	0	7.24611	3.86331	6.03245	7.05246	2.26872	3.33503	2.88486	1.89391	6.80485	23.8224	4.68339	9.33011	20.2445	4.35535	20.3064	17.9602	65.0458	35.6491	60.9928	48.5236	15.723	11.8244	3.85429
1601	TGCAATAAAGAACAATAGCAGGCCAGGTGCGCGGTGGCTCACACCTGTAATCTTAGCACTTTGGGAGTCTGAGGCAGGATTATTGCTTGAGCCCAGGAGTTTGAGACCCCTGGGCAATGGTAGTGGGACCTCATCTCTTAAAAAAAAAAAGAAAAAAAGAAAAAAAGAAAAGAAAAAGAAAGACAGAAATATATTAGCCAGGTGTCTTGGTGCATGCCAGTA	222	chr20	56294314	56294536	+	none	none	15.2802	37.899	0.000602928	1.23972	17.6182	15.6999	16.4191	6.03245	8.81558	24.9559	12.5064	20.194	29.3557	36.2926	64.2169	44.4922	29.1566	37.7897	30.4875	37.7119	40.6467	8.81977	35.6491	20.8879	71.7746	50.3136	31.5318	37.2582
3760	GCACAGAATACTGTGGGAACATAGGAGAGAGTAGGATGAACTGTACGTAGGTAGCCAGTGATGACTTCACTGAGATTATATTTAAGCTGAGCCTTAAGTGACAAGTAAATGCTGGGCAGATGCAGGAGAAGAAGCAAAAACATAAACAAAGGTCTGAAAATTAATAACTTGTTTAAGGAATGATGGACTATAGGGTTTTGGAGCTAATGAAAGAAATGGG	220	chr8	128067884	128068103	+	none	none	1.71821	11.7086	0.000607357	2.16272	0	0	5.79496	0	3.52623	0	2.50127	1.92324	12.3104	13.6097	38.323	3.51254	5.83132	6.74817	11.3239	15.2298	5.67164	3.30741	6.39855	34.2562	22.24	3.1446	1.57659	3.85429
6905	GATACAGACTTTTTTCTTGCTACATGATGTTTCTTGTTGGTGTTTAGAGAAAGCATACTGCTTCTTTTGCTTCTTATGACAAAGAAATGAACTATGGTTGCAGAGTGTGTAATTTAAAAAAGAAACTTTGTCACTTTCTAGGAAGAAATTGCCTAAAAATAGAAAAATCTTACCTCTCCTACCTCTTCTACCTTTTGAGAAACTCCTTTTTAT	213	chr2	193333554	193333766	+	none	none	1.67463	13.3139	0.000626326	2.24089	0	0	2.89748	3.44711	7.05246	0	0	0	25.5678	6.04876	25.8939	4.68339	0	20.2445	16.5503	1.45046	10.398	6.61483	7.31263	15.0393	2.02182	37.7352	14.1893	19.2715
89961	AAATGATTGGCAAAAGAATTCCTCAAAATTGTGGAATTCTCAGATCCAAATAGATCAAAAATTGGCAAACCAAATTAATGATCTTAGACAAACTGTCATTTGGATGGGAGAGGCTCATGAGCTTGGAATATCTTTTTCAGTTACGATGTGACTGGAATACATCAGATTTTTGTGTTACACCACAAGCCTATAATGAGTCTGAGCATCACTGGGACATGGTTAGATGCCATCTGCAAGGAGGAGAAGATAATCTTACTTTAGACATTTCAAAATTAAAAGAATTTTTTTTTTTCTTTGAGACAGAGTCTCGC	311	chr22	23887915	23888224	+	none	none	104.376	538.008	0.000634372	1.98061	42.5773	201.683	173.849	60.3245	22.0389	274.515	35.0178	25.0022	328.594	409.047	375.979	1453.02	718.418	1712.68	1048.77	506.209	228.756	220.494	637.113	23.3945	135.462	287.207	305.858	217.125
62263	TCTTATATTAAAATGTTCTATCATTTTCCTAATTATTTTAAAGTCGATTACAAAAATATATATATATTCTTGTAGTGCCAGAAAATTGAATACATTAATAAATGGGGTAGAATAGATGAATCTCCCATGAAGAAGAATTCCAAATAATTTATGAACTCTGCCCTCAAGGATATGGAGCAGAACTTCCTACTTCTCTAGTGTGAGCTGAATAGTGACTTCCTTCCAAAAATTACATATGGAAAGGGGGAAAATAACTTTGTAGTGGAGAAATCTGATAAACACTATCTCGGCTAGGTTATCAAGATTAACACTAACAGTAATAAGTCACACTGATAGTATGTACCTTTGAGATGAAGTGATGAGAAGGCCACTTTACCTCTCTGTTGTATTCCTCTCAAA…	440	JH636052.4	4000016	4000455	-	none	none	21.4684	102.946	0.000647568	1.91367	10.2773	12.0768	18.3507	12.0649	42.3148	31.0058	28.3477	17.3092	102.271	47.634	40.3945	4.68339	281.07	94.4743	108.013	124.739	88.8557	249.159	158.136	146.216	148.604	5.241	28.3786	19.2715
29529	TTCACATGCATGTAAAGCATCTATCTCAGAACAGCTTTCTAAGGCATCTCAGGTCAAAGCGTCCACTTTGGAATCCTCTTATGATGGTGTCTCTGAATATTTTATTCTAAGACACAATTATTCACTCACAAAATAAAAGGATATATTTTTTTCCAATTTATTCTGTTATTCTACAGTTGTATGAAGTAAAAACTACAGAGACATTACCCCAAGTAATAATGACCAAATCCGTGATAAATTTCTTTGCCTTTTTTTTT	257	chr7	38311150	38311406	-	none	none	65.7328	336.373	0.00065767	1.9698	69.0046	28.9844	193.165	2.58533	33.4992	141.417	53.3604	3.84649	220.641	177.682	255.832	289.199	76.9734	237.535	261.321	445.29	402.686	509.342	343.693	297.444	1396.07	105.868	271.173	91.2183
75583	ACAGATCTTGTGGAGTGGTCCTTCCTTCCTCACAGTACAATTAAGACTTTTACATTGTACTTGGATCAAATGGCTACATTAATTGGTCAGGGAAGATTATGAATAATAACATTGTGTGGAAATGACCCAGATAAAATCACTGTTCCTTTCAACAAGCAACAGGTTAGACAAGCCTTTATCAATTCTGGTGCATGGCAGATTGGTCTTGCCGATTTTGTGGGAATTATTGACAATCGTTACCCCAAAACAAAAATCTTCCAGTTTTTAAAATTGACTACTTGGATTTTACCTAAAGTTACCAAACATAAGCCTTTAAAAAATGCTCTGGCAGTGTTTACTGATGGTTCCAGCAATGGAAAAGTGGCTTACACCGGGCCAAAAGAATGAGTCATCAAAACT…	530	chr22	23884928	23885457	+	none	none	121.921	685.232	0.000659294	2.04295	48.45	309.167	149.703	32.7476	17.6312	356.945	36.6853	24.0405	434.653	643.437	315.906	1682.51	1453.16	1573.67	1470.37	645.453	373.383	315.307	749.544	19.2169	189.04	335.424	476.13	286.503
32281	GAAATGAGAAATTTAATTCTTATTTTCTTAGAAATTGTTCAATTATTAAATTCACTTCAAACCAGCCAAAGCATTGGAGTTTCAATTGGAAATCAAAATAGAAAGAATTGTAACATTTATAATTTCAGTTATTAGATTAAAAATACGTGTATAACCCATTAACATTCCAGATTCAAGTGATATGCCTTTGTAAACATATGATGCTTTGTTATGTATCTTGACCCTATCCCTATAAGAAGCTCTGAAATCATGACTTTTAATAGAGCAATTA	271	chr7	38306819	38307089	-	none	none	63.5545	287.556	0.000681663	1.86537	51.3864	26.5691	188.336	12.9267	33.4992	131.586	58.363	5.76973	112.688	202.633	259.975	160.406	74.6409	159.257	265.676	492.43	351.642	496.112	262.34	225.59	1058.42	77.5667	309.012	92.5031
34247	TGGAAAGTTCCATTTTGGTCAGGAAAGGTTGCATCCATTTACTTCTGTGTCTGTTCAGTGTTCTTTCCTATGGTGTTTCACTTCCTGATTTTCCAGAGCCCATCTGCACTCAGAAACCTGGGCATATCAGTTCTGCTTCTGAAAGTAGACTAATGATTTACTGCCTCATTTGCAGTGAAGCCTTCCATAGATTTGTGAAATGTCATCCAGAAGCATGATTATATTGTCCCATTCTGTGGTTAACTTATGCCC	252	chr2	42665871	42666122	-	none	none	1.05826	22.8683	0.000689146	2.56477	0	0	0	4.30889	2.64467	1.51248	0	0	57.7644	12.0975	14.5006	24.5878	33.8216	113.369	9.58177	0	63.3333	0	0	4.17759	2.02182	7.33739	7.88295	15.4172
123197	ATTTTTTTTAATAAGTGAGAAAACATCAATAGCGGTCAAATGGATCCCATGAATTAGTCAGTAAAGGGGTTAGGGGTAGAATATAGGCATTTGTATTTTTAATCAAAATGAAGAACTAAGCAAGGCACAGATAGAGCCCCCACTCCAGGCTCAGTCTCTGGTGGTTACTAGTTTAGCGGGATAACTGGTCAACCTGGACAGGGCATGTAGATCAGTTTTGAATTTCTTGGTTGCACAG	238	chr21	38011111	38011348	-	none	none	4.92016	22.35	0.000703685	1.84099	0	3.62305	7.72662	7.756	8.81558	2.26872	9.17132	0	17.9922	9.82923	23.8224	29.2712	16.3277	29.6919	20.0346	13.7793	5.67164	28.6643	37.4772	8.35517	35.3818	16.7712	1.57659	62.9535
45327	TCTTCCAACCCAACCTTTAGGTTTGGTAAAGTATAGAATAGTGCCATCCCTGAAATGCTTTGTAAATTCCTTTTCCTTTTCATTTCCAAAGTTGATCCCAGTACAACATATTTACAGGATGGCTTTAAACTCTTGATGAATTCAAAGCCCTGGTGGTGAATAGAGGAAAGGAAATGTGTGGCCATGCATTGCTGCAATCAACTGCCTACAAAGTGGACTTTC	222	chr2	96199132	96199353	+	none	none	2.74904	11.7403	0.000718036	1.80921	2.93637	3.62305	3.86331	1.72356	0	5.29368	1.66751	2.88486	6.6287	12.8536	20.7151	3.51254	2.33253	10.7971	8.7107	2.90091	12.2886	13.2297	11.883	5.84862	15.1636	36.687	6.30636	17.9867
85820	TCTGGGCCTCAGGGTTAGAGGTTGTCTTTGGCGTATTTCAATATAACCAGTCTTTAGGATCCTTTGATATCATTGTTAGAAACAGTAATGCGTAGTCATGGGCTGAGAACTTGGGACCAGGATCTAGGATTTTTGGTCTCTCAGCCCTGGCTCCCCACTTCCTGGGATAGAACCAAACCAGTGTGTATGGAAGTTGACAGGCACACTGTGCATTGGGGGTTGAGCTGTGTCCCTGCAAGAGATATGTTCAAGTCTGGACTCCTGGTACTTGTGAATGTGACCTTATTTGGAAATGGAGTCTTTGCAGATGTAACTAAGATGGAAGTTATAAGAAGAGGAAAATAGATACAGAGACACACATACAGAGGAGGACACCATGTAAAGGCACAGACA	393	chr21	38011697	38012089	-	none	none	3.65367	17.4529	0.000746043	1.87816	0	0	7.72662	2.58533	3.52623	0	12.5064	2.88486	13.2574	3.78047	25.8939	11.7085	11.6626	16.1956	10.4528	18.8559	12.2886	23.1519	32.9068	11.6972	28.3055	24.1086	1.57659	33.4039
60807	ATAGAGCAAGACTCCATCTCAAAAAAAAAAGAAAAAAGAAAATAGTCTCTGGTTAAATAACCTCTGAAAGACTCCACCAAAAATTTCATCTTAGCATTTCTCCCCAAACTTCAGGTAAAATAAAATAGAGTTGAGAGAAAAATAGAAAGGCAAGGGAGTACCTGTTCACTATTTTTATTAAACCAGTGTTCTACTTTATTTTAGGTGTATCTTTTCTTATTTAAATGTCAGCTAAACTTTCTTTTTAAGATATTGAATGAAAGATGCCCGTCCTTCAGGTTTCGTTTAAGCAAGAATCCCCATTCTCAAATAATATAATATAAACTTTCCAAATTCTTAAGTAGATCATCTGAGATTGAAAGCTAAGTTTAACTTTCTCAAAGATATTTTAGCCGCCAT…	412	GL339449.2	554381	554792	-	none	none	34.3504	85.4786	0.000752162	1.23903	24.9591	25.3614	35.7356	52.5685	47.6041	31.7621	30.849	25.9638	59.6583	94.5119	128.434	52.6882	54.8144	59.3839	141.113	64.5453	162.587	34.1766	41.1335	74.3611	79.8618	59.7473	189.979	70.6621
123215	CTTTAACTTTTAACCCAGATGATTTTATTTTAAAATGTGTGTTTATATACATCCATATGTACATAGAAAAAAGACAGGAATGTTGAAAGCTAAAGTATTAGTAGAGATTATTTCAGGATGGTAGGTTATAAGGATTTCATGTGCTTATTTATTTACCTTTTGTTTGTTCATCTGTATTTGCTAATTTTTCTATTTTTTTATTTTTATTTTTTGAGACAGGATCTCGCTTTGTCACTCAGGCTGGAGTACAGTGGCACAATCATGGCTCACCACAGCCTTGACCTCCTGGGCTCAGGTGATCC	302	chr11	46277472	46277773	-	none	none	5.95426	25.2403	0.000766834	1.8125	7.34091	8.45379	11.5899	1.72356	3.52623	7.5624	1.66751	5.76973	56.8174	8.31704	11.3933	11.7085	29.1566	31.0416	20.0346	21.7568	27.4129	54.0211	47.5321	49.2955	19.2073	9.43379	1.57659	5.13906
96078	GGGGAATATTACTCCTAAACCAAAGGCGTGTGTACCCCCTGTGATATTATTCGTAATACTCTCATACACTCACAGTATATGAGAGGGATATTAGCACTGAAGTCACAATGTGTGTACACCCTGTGATATTATTCACAATATATGAGGGAGGTATAACTTTTACTCATGATGTTCTAGAAAGATGTTACTCCTAATGTCACAGGGGTGTACACC	213	chr12	52507429	52507642	-	none	none	18.6436	50.1131	0.000787371	1.34898	41.1091	18.1153	12.5558	21.5445	14.9865	15.1248	14.1739	11.5395	42.6131	81.6582	34.1799	30.442	57.1469	49.9364	96.6888	44.9641	53.8806	37.484	95.9782	45.9535	16.1745	14.6748	26.802	73.2316
60918	CTGCACGCCAGCCTGGGCGACAGAGCGAGACTGTGTCTCAAAAACAAAAAAACAAAACAAAACAAAAAAAACCTTATTCTCAGAATGAAGATCTGAAATAAGAAACAAACAAACAAACAAAAAATATTTTAAAAAGGAAATAGAAAACAAATAACTTATTCATGATTCCATGGGAAAAAAGACTGAAAATAAGTGTTCTAAAGTAAATAAGGGCATGAGAAATTGTTCAAAATATAGTGTTAAAGAGAAAAAAGGTTATTCAACAATATGATGC	274	chr11	46276695	46276968	-	none	none	7.24834	33.2724	0.000797819	1.88479	14.6818	9.66148	8.69244	1.72356	1.76312	8.31864	8.33757	4.80811	74.8096	6.04876	6.21454	29.2712	23.3253	36.4401	27.0032	14.5046	35.9204	103.632	69.47	46.789	30.3273	14.6748	2.36488	11.5629
43312	TTATTAATGTTAACCCATTTCAACAGACTCCAATACATCACTGGATAATCAGATCTTGCTAATTTCTTTTAATTTTGGGTGCCTAGGATCTCCTAGATGATGCAGAGAGAAATAGTGATTCTAGGTCAGTTTATTGTACTCTTTAACTTAATGAGATTAGTTCTATCATTTTATTTCTGAAGCGATGTTAAGTTTTAGTTGATGCAGTTTGTCAAGTAAAAAAAAAAATATTGTTTCTAGTAATCCAAACATTTTATACCAAGATCTGTATAGAACTTTATCAAAGGATATTTTCTATGATAGTTGAATTGATTGTATTTTTCCTTTTAATTGGTTAAAGTGGTTAAGTTCATTATTTCCTACTCTATCTATGAAGATCTCAAGAGTAATTTAGGGATT…	420	chr5	34139518	34139937	-	none	none	5.51638	19.9149	0.000812734	1.64814	2.93637	6.03842	13.5216	3.44711	5.28935	6.80616	4.16878	1.92324	7.57566	31.756	60.0738	28.1003	8.16385	8.0978	15.6793	9.42796	24.5771	5.51236	19.1956	37.5983	18.1964	16.7712	18.9191	8.99335
118636	ATTTTCTCAATAAAGAAATTACTTTCAACTTTCTAGGCTCACAGTCATTCAGATCATCTACCATCTGCCAATGAGATCAACTTGGTTGAGAATTTTGGGATTTTAAATTAGCTGTCCTACCTTTTTAAATCTCTTTTAAATCCTTCCCATATTAGGATCCAACAAAACTTTATCTTAGGAAATATGATAAGTAGCTTCCAATTGTTGTAGTGTGGTCTACAAATGTGATTTGATTCATCTTCCCCCACTCTAATTTTCTCCCCTTTTCTCCTCCCTTACATGGAGTCTAAGTAAGTATTTGAACAAGTCATTTATGTATTAAATTAGAACTGATATTAACTAAATGTAGGAACATTCTGCTTATACCAGTTTTTCTCATGTCGTAAAGTGTAGTTCTGA…	1113	JH636052.4	4000589	4001701	-	none	none	12.338	58.8419	0.000812842	1.90565	10.2773	19.323	7.72662	1.72356	16.7496	10.5874	15.0076	17.3092	73.8626	27.9755	11.3933	4.68339	146.949	45.8875	67.0724	65.2705	58.6069	134.502	104.205	83.5517	80.8727	2.0964	16.5542	17.9867
44902	GTATTTTGCAGGGGCTAAGGATTCTAGTTAGTGAAGCGGCGATCTGGTGGAAAATTAAAGTATCCATGAGAAATGCTGAAAATAAGAATTAATGAGATCTGGTGGCCTAAGGAGTAGAGTCCAAAATGGTAAATCTGTGTAACTGGCATGGTATCAACTCTGTTTTAGCTATTGCTTAATAGGTTGAAGAGTTGAAGGGTTTTCAAAGTACTTTTTATTGTGAAAATTTAAAAACATGTATATTAAGGGTAATATGACAAAAATCTGTATACCCACCACCCAGAATTTAAATGTTTCAGGGTTTTAAAAAAATTCTTCTCAGATCATTAGAAATAGAGTTGAAGTCCCCTTTGTATCCAGTCCCAGTCCTA	371	chr7	7588003	7588373	-	none	none	2.48138	15.9462	0.000823431	2.10229	0	0	2.89748	6.89423	5.28935	2.26872	2.50127	0	5.68174	9.82923	17.6079	2.3417	8.16385	2.69927	6.09749	38.4371	5.67164	16.5371	20.1097	47.6245	31.3382	2.0964	37.0499	3.85429
88411	GTAGGGGCTACCTAATGAACTCTATACCCTATATCTGCATTTGTATATTTTTTCTCAATTTATGTTAGCTTCTTTGGTCTAAAGGTAGGAACTTAAACTTCCTAATATTTATTTTCACTTGCGTTAATGATCTTTTGTTTAGAATTATTTATGTACTCATAATATTGCTCCTTAATGTATTCTTAAATGTGTTACTTGGAATCTTTCTCACAGAACTTTGGCATGTTTCTATGTTTATA	239	chr5	34159957	34160195	-	none	none	5.54715	20.1013	0.000835446	1.64388	2.93637	3.62305	9.65827	6.03245	7.93402	6.04992	3.33503	4.80811	6.6287	18.9024	73.5387	21.0753	12.8289	6.74817	17.4214	7.97751	36.8657	6.61483	18.2816	33.4207	21.2291	10.482	14.1893	15.4172
10640	TGAAAAAGATCTTGGGTTTGCTAGTTATATTGCTTAATGCAAATGACTGCAGTAACCTTTAAATATGATATACTCAACTCAGAGGACATAATTTCTTCCATATATTAAATACTACCTTTGCTGGAGACATCTTACTTTTCCAACCTTTGCTTTTAAGAAGTAGTCTGGAGTGGGTGACATTTATTTTTGTTGATTTGATTCGTTATGGTTATTGATGGTGACATTCCTTTAGAACTCAGATCATCCTCAAAATCGGTGTGCATTTGCATTTACTTTTGACAAAATTATTCCTCAAGAAAGTTCTAGAAAAAAATGGCTG	319	chr8	128040609	128040927	+	none	none	3.43066	16.2248	0.000852741	1.8742	0	2.41537	5.79496	1.72356	4.40779	6.04992	4.16878	2.88486	8.52261	17.3902	39.3587	9.36678	17.494	6.74817	31.3585	23.2073	8.50746	3.30741	9.14078	45.1179	22.24	11.5302	6.30636	0
60531	GCAAAAGCTGAAACTACTCTGCTTTCTCACTTACCTACACTTTTGACTTTCGAAATACATTTCTCTCTTCGGATATGAGCTGCAAACTCCTTATATAAAGGCTCCAACTCTGCAGCCCTAATTATTCTAGTTGGCCCAAGAAAAATCCTAATTGTTTTATCTAAGGAGACGGAATTTTCCAATACTGTAGAGGCATGTGTGTGTGTTTGCTTTAAGGAAGCTGTTTTGGTAATAAAAAGTCACTGA	246	chr5	69279332	69279577	+	none	none	22.445	59.3897	0.00087422	1.31703	26.4273	21.7383	28.9748	32.7476	25.5652	15.1248	11.6726	17.3092	40.7191	57.4632	114.969	45.6631	22.159	44.5379	83.6228	36.2614	115.323	14.3321	43.8758	66.0059	84.9164	50.3136	95.3837	34.6886
70650	CTGGAATAATATTTTGTTCAATGTCATTTTGTTATAACATTGATGAGAAAAAAAATTCAATTCCTGGGCCAGGCTCACTGTGTGGAGTTGACATGTTTTCCCCATGTCTGTGTGGGTTTTCTCCAGGTCCTGGAGTTTCCTCCCACATCCCAAAGCTTTGCCCATTAGATGCATTGGTGTGTCTACATGGTGCCTGTCTGAGAGAGTGGGTGGGTGTATGAGTGCCCTTTGACAGTAC	238	chr7	7576858	7577095	-	none	none	1.67181	14.7336	0.000893884	2.28087	0	2.41537	0	2.58533	3.52623	1.51248	3.33503	0	0	6.04876	20.7151	2.3417	3.49879	2.69927	15.6793	31.1848	6.61691	7.7173	18.2816	55.1442	23.2509	3.1446	39.4147	0
43297	CCGATCTGAAAAGGCTACATATTGTATTAGTCCAACTATATGACATTCTGGAAAAGGCCAAATTATGAAGACAGTAAAAAGATCAGTAAAAAGACTCCTCTAGGAGTTAGTGGGGAGGAGGGATAAATAGGTAGAGCACAGAAGATCTTTAGGGCATGAAACTATTCTGTACTACAGTAATACTGTATTACTGATATTACTGATACTACAATGGTGGATACATACCATTATGTATTGTCAAAATCTATAGAAGGAACAACAGCG	264	chr8	128046118	128046381	+	none	none	1.43753	10.0562	0.000932795	2.16735	0	2.41537	1.93165	2.58533	2.64467	0	0	1.92324	9.46957	11.3414	24.8581	0	5.83132	2.69927	15.6793	15.955	5.67164	3.30741	7.31263	38.4338	10.1091	6.28919	3.94147	0
1801	GTAAAAGTTGGGTGTGTACAGGTAAGTTAGGTCAGATTGTGATGTTTGGATTTAGTGACTGAATAGTGGAATGGTGACTAAGATTTAGATTATAAAAAGGACAGGATTACAGTTGTGTTTGGGAAGAAGACCTTGAGTAAATTACTAAAGACAGGGGCACATTTGGTATGTTTTCAAAATTTCCAGTGGGAGCAATAATGACTTGACTGTGGCTATTATCTTAGA	225	chr8	128068112	128068336	+	none	none	1.9081	13.5133	0.000947169	2.1503	0	0	0	5.17067	2.64467	3.02496	2.50127	1.92324	1.89391	17.3902	36.2515	5.85424	12.8289	5.39853	19.1635	21.7568	8.50746	3.30741	4.57039	53.4731	14.1527	5.241	0	6.42382
95946	GTTTAGAACAATGTTAGCAAGTCTACAATAGATGTTTGATATAACGTTAATTTTAAAGGCTTATGATTACACATAAAAATGAACTTTATTTAAAAACACCCCTCTCTGTGACATAGTGTTCATGAGATAGTTCTGAAGTCCAAGGTGAGTTCCCACAGACTGCCCTGTCGGTCCCTCCAGCAATTTCAATCAAGTTTCCTCTTGAGGTGCACCCTCTTTATAAGTGAAATTGGATTTCTCTGAGTTATAATCTGCATTGTGACATCCCAATTAATTATAAACCAAATACTTTACTGTATTTCAAACAGAAATGACTATAGC	321	chr7	38336644	38336964	-	none	none	3.96358	26.6949	0.00095249	2.13084	0	2.41537	3.86331	2.58533	5.28935	4.53744	9.17132	3.84649	14.2044	4.53657	0	21.0753	38.4867	6.74817	16.5503	5.80182	9.45273	110.247	45.7039	10.8617	38.4146	90.1451	11.0361	3.85429
37145	ATTCTGCCTATAAGGTAGGGAAGGACTTTCTGAAAGGGTGACACTGAGTTCCACCTTGAAAAATGCCTGAGAATTCACCCATAGACACAGTGGAAGAGGGGTGTTCCGAGGAAGGGAGATCAATGTGCAGAGAGACAGAAATCCCGGTTCGCTTATTCCCAACAAGGCAGAGAACAAACCTCTCCCAGTGATGCCCTCCCTTGTTCCCG	209	chr3	193567220	193567428	-	none	none	1.03944	18.512	0.000973276	2.4958	0	3.62305	0	0	0	3.02496	1.66751	0	43.56	6.04876	0	5.85424	5.83132	26.9927	81.0095	3.62614	12.2886	15.4346	61.2432	5.84862	4.04364	0	0	24.4105
18891	AAAAAGTGTATGTATATGTTTGTAAGACACTAGATTTCACCATTTTGCATTTGGACAACCAGTTTGGATGAGCACATTTCCTGATATGCAAAGGAGAGAGAAGACAGAAGTTTTCAAAATATTGAATAGAGTTTTAAATAATTGTAATATAAACTTGAGAAGTTGGCTTGTGTGGAAAAAAAGAATCAGGACGAACTTTAGAGTA	205	chr8	128065269	128065473	+	none	none	2.51319	10.8856	0.000981706	1.78268	0	0	4.82914	2.58533	4.40779	3.02496	3.33503	1.92324	10.4165	21.9267	15.5363	2.3417	8.16385	5.39853	17.4214	15.2298	12.2886	5.51236	2.74223	14.2038	27.2946	5.241	7.88295	2.56953
74602	GTGTGTGTGTGTGTGTGTGTGTGTGTAAGTTCTCTACAGTGTTCTCAATTCTTTGCATATATTAGCTCCTTTAACCCACACTACCTATAGTGTCTGCTCTGTTGTTCTCATCAAACATATCTAACTCCTGAAATAAGTGGAGTATTAGTTCATGCACTTGTCCAAATCACAGAGCTGATAGGTGGCAGGACAGCCTAGGGAGGGACCCAGGTAATCTGGTTCCTCTTGAATATGACACTAAACTGCTTCTGAATCACAGGAGTATAAAAGAAAAGACACATTGTTCCTGTCCCCATGGAGGAGACAGAACTGACCATCATGGAACAGTAACTGACACACATTACTACCGTGTGCTGAAACTTGTGCCCAGGGTTCCAGTGATTAGGTGTATTCAGAGAA…	434	chr7	38338259	38338692	-	none	none	8.28096	53.3938	0.00102049	2.10793	0	14.4922	6.76079	1.72356	11.4603	14.3686	11.6726	5.76973	16.0983	9.82923	2.07151	42.1505	114.294	22.9438	39.1982	18.8559	10.398	216.084	77.6967	14.2038	85.9273	160.374	12.6127	11.5629
76131	CAAGGCTTTAGTGGAAGGTAATCTTTTCAGTTTCTGACCCAGATTTCTTTTTCAAGCAAAACTCCTCTGAAAGCCTCTTTGCTATAGAGGTGATGAAGGCACTTGCTAGCCTAAGCAGAAACATAAAGTAAAAAATTTTGTAGTAGGGAATTTTTGTTGGTAAGAAATCAGTATCATCTTGTAACACAAACACGTGTTAATAGAACTTAAAAATACTCAGCCTAATTCCTTGGGACTTTCAGTATCTTGACATCACTTGTATTATCATTTGAACTTGGACATTGAGCCCTTTATTTTTGGGAGTTTACAGTTAA	314	chr17	67544975	67545288	+	none	none	11.4607	34.7568	0.00103727	1.46168	8.8091	16.9076	9.65827	12.0649	14.9865	13.6123	10.8388	4.80811	53.9765	15.878	30.0369	21.0753	97.9661	18.8949	24.39	20.3064	42.5373	33.0741	89.5797	27.5721	26.2836	11.5302	27.5903	15.4172
44014	GTCAAGGTATAAATAGATCTGATCTTTCTCTATTTGTAGGCTCTGCATGAAAAAGTTAAAACTGCTCTATCCATTGACCAAAGAAAATAATTAAAGAAAAATATTGAACATTCAAACCTATGATAGGACTAGATCAATCTACTTTCAGATATTTCTTAGAAAAAAAATTGTAAAACTTTCCAGATGGCACCTTGATTTATTTT	203	chr7	7579698	7579900	-	none	none	2.87293	22.0289	0.0010754	2.19518	0	0	3.86331	4.30889	3.52623	3.7812	7.50381	0	1.89391	12.0975	31.0727	2.3417	10.4964	0	11.3239	56.5678	10.398	16.5371	28.3364	59.3217	40.4364	3.1446	64.6402	3.85429
91455	GGCAATTTTCCAGCTGTTTTGCCACGACAGGCCTCAATCCGTAATACCAAGGCTGGAATGGCGTGTTAGGGGGGCGGTGGCTGACGGGGATACGCGGACTCTTGATGCGTAAGGAGTGCCCCTCTGCTCCCATACGTTCCCCAGCCCAGCCTTCCCTGAGTGTATCGCGCGCGCTGTGCCTTCGCCGTGAGTTCGACATAAGTCCCAGGCTGTCGCGTCTGCCATCAGACGCGCAGATTTAGTTGAAGGCAGCGTGGAATGGCGTCTGCAGGGCTGTTGTGTACTTGACATAAACAGATTCGGTGTGGAACT	312	chr17	62223861	62224172	+	none	none	4.11451	19.4591	0.00110286	1.90376	5.87273	10.8692	2.89748	0	1.76312	5.29368	3.33503	2.88486	113.635	15.878	10.3576	14.0502	13.9952	22.9438	8.7107	5.80182	7.56219	15.4346	12.7971	10.8617	8.08727	25.1568	5.51806	20.5562
44086	TATTTTTCGTACTATCCTAGGGGATGTTACTCCAAATGTCACAGAAGGTGTACACTCTGTGATATTACTCGTAATCTGTCAGGGAAATGTACTCCTAATGTCACAGGGCATGTACACCATGTGCGCACAGCCCTTGTGATGTTATTTGTACTATTCTCGAGGGATGTTAATCCTAATATTCCATATGCTGTTAACCATGTGGGAACACCTTTGTGGTATTATTCCTAACATACTAGAAGGATGTAACTCCTAACATCACATGGGGTATACGCCATGTGTGTACACATTCT	290	chr12	52505095	52505384	-	none	none	32.9519	85.1899	0.00110925	1.29711	98.3683	14.4922	24.1457	33.6094	21.1574	27.9809	27.514	16.3476	78.5974	120.219	91.1465	85.4719	79.3059	68.8313	143.727	95.0049	96.4179	69.4557	113.346	106.946	37.4036	24.1086	42.5679	110.49
35060	CTTCCTTTTTCTCCTGCTCAAGCACAAGCCTGGATAGCGCAAAGGCCTAAAAATTTTCTAGGGCATTTAGAGATAATGAAAGATGGCCACTTTGATGCACAAAGACCTAAATTTTAGTCCCTCACTGATTAATGATTTGACCTTTGGGTGGGTCTTAATATCTGTCCTCTATTTTATCAACTGTGAAATGGCAGAATTAAATAAAAGTGGTTTCTAAGTTTCCTTCCAGTTCAGAGATTTAACACTATTGTTTGTCCCCAATACAAGAAAAGTTTAAATACCAATCAGTGGTTATCAAATAATTCACCAAGATCTAGAATAACACTGTCTAATATCTGAAAGTAAAATGAACTAAGTGAAAAATAGAAATATTTTGCCATTTAAAGCAGA	390	chr7	7579906	7580295	-	none	none	1.81869	16.3166	0.00110958	2.27528	2.93637	0	0	0	1.76312	1.51248	8.33757	0	1.89391	9.07314	20.7151	0	10.4964	4.0489	5.22642	41.338	9.45273	14.3321	23.766	54.3086	34.3709	5.241	26.802	0
9958	TCAAACGCAGGTTAGACAAGCACAAACCCCAAGAGAAAATCAAGTAGAAAGGGACAGAGTCTCTATCCCGGCAATGCCAACTCAGATACAGTATCCACAATATCAGCCGGTAGAAAATAAGACCCAACCGCTGGTAGTTTATCAATACCGGCTGCCAACCGAGCTTCAGTATCGGCCTCCTTCAGAGGTTCAATACAGACCTCAAGCGGTGTGTCCTGTGCCAAATAGCACGGCACCATACCAGCAACCCACAGCGATGGCGTCTAATTCACCAGCAACACAGGACGCGGCGCTGTATCCTCAGCCGCCCACTGTGAGACTTAATCCTACAGCATCACGTAGTGGACAGGGTGGTGCACTGCATGCAGTCATTGATGAAGCCAGAAAACAGGGCGATCT…	1225	chr22	23881636	23882860	+	none	none	195.22	1117.28	0.00111077	2.0336	85.1546	375.59	413.374	62.048	18.5127	514.999	51.6929	40.3881	606.999	1013.17	1189.05	2176.61	2102.77	4035.4	2202.94	824.584	444.278	406.812	949.727	27.5721	200.16	583.847	673.204	439.389
109253	CATCCTGTGAAATTATTTGTAGTAATCCAGGGGGATGATTATCCTAAAGTCACAGGGTGTGTACACCCTGTGATATTATTCATATTATTCTAGGGGGATGTTACTCCTAATGTCGCAGATGTGTATGCGCTGTGATATTATTCACAATATACTAGCTGGATATTGTTACTAATGTCACAATGCGTGTACACCTTGTGATATTATT	205	chr12	52506563	52506767	-	none	none	14.862	44.5782	0.00112305	1.47209	45.5137	7.24611	6.76079	15.512	13.2234	18.906	5.00254	6.73135	45.4539	59.7315	50.752	32.7837	39.653	41.8386	85.3649	58.0182	69.0049	23.1519	54.8447	51.8021	16.1745	9.43379	21.284	53.9601
91780	GGGTGGTATAAATGGGGAGCATTTTGTTCAGGGATGTTTTCTGGATGTGGCATTTGAGCTAGACCTTAAAAGATGGAGTACAATTCCACAAGGAAGGCTTAGTAGTTGGGCATTCCAAACAAAAAGGACAGGTGTTTAGACATGGAAAGCATTAGGGACATTTGAGAAATTGGGAATAGCTCAGTTTAGCTGGCAGACTGGAAATACAAAGAGGAATTCCAAGAACCTA	229	chr5	148246198	148246426	+	none	none	4.64159	14.0864	0.00116251	1.46787	7.34091	2.41537	3.86331	11.2031	3.52623	3.7812	5.00254	0	6.6287	23.4389	20.7151	3.51254	13.9952	6.74817	18.2925	18.1307	14.1791	20.947	11.883	9.19069	8.08727	11.5302	14.9776	23.1258
116615	ACTATTGGTTATTTCTGGAGTGTGGCGGGGTGATAAGAATATGGGTGATAAGAGTCGATATAGTACAGTAGTCAGAAGTACATACCTGAAATCAGACTGCTTGTGCTAGATTCTTGTCACTACCACATACTAGCTGTGTATCTTGAGGCATGTTTGTTGTTCTCTCTGAACATCCATTTTTCTATGTATAAAATGAGAACAAAAGCACCTAAATCAAAAAGTTGTCAGCAGGATTTAATTAAAAGATACCAATAAAGTGCTTGATATAGTTCCTGGCACATAGTAAGTACTCAGTAAATACTAAGTTTTCCCCCAGGTTCTAAGTTTTCTGTAATGCATCATTTTACTTTTACCATTAAAAAATGTTATTATTGTTAAGCTGCTCTATTTCTGAAAAAC…	413	chr8	128043905	128044317	+	none	none	3.36153	16.6848	0.0011676	1.92032	0	4.83074	10.6241	1.72356	5.28935	0	2.50127	1.92324	10.4165	24.9511	33.1442	2.3417	15.1614	9.44743	17.4214	16.6802	9.45273	6.61483	8.2267	51.8021	42.4582	8.38559	7.88295	2.56953
59303	AAAAAAAAAGCCTAGAGAATACAAAGGTGACACCAACTCCAGAGAATATGCTGCTTGCAGCTCTGATGATTGTATCAACGGTGGTAAGTCTTCCCAAGTCTGCAGGAGCAGCTGCAGCTAATTATACTTACTGGGCCTATGTGCCTTTCCCACCCTTAATTCGGGCAGTTACATAGATGGATAATCCTATTGAAGTAGATGTTAATAATAGTGCATGGGTGCCTGGCCCCACAGATGACTGTTGCCCTGCCCAACCTGAAGAAGGAATGATGATGAATATTTCCATTGGGTATCCTTATCCTCCTGTTTGCCTAGGGAAGGCACCAGGATGCTTAATGCCTACAACCCAAAATTGGTTGGTAGAAGTACCTACAGTCAGTGCTACCAGTAGATTTACTT…	1111	chr22	23886597	23887707	+	none	none	156.21	890.146	0.00117148	2.02482	51.3864	349.021	340.937	40.5036	17.6312	388.707	31.6828	29.8103	557.758	668.388	686.706	2369.8	1083.46	2755.95	2053.11	912.337	385.671	295.462	888.484	26.7366	215.324	471.69	505.297	366.158
43371	CAGAAAATGTCAAGCTTTTACCTAGTAACGATTGAGGAGCTGGTTCTGTGTTGCACGATTCCATACATTCCAATATCACAAAGGAAGAAAAAAATCTTCCTTCAGGGAAAGACAATTTGTTCTTGTTTCCTTTTGACAATGGAATGCATGGATTTGGTCAATGCGGGGGAAACTTGGTTCAGCATTCTGGACTTTTATGGCTGTGTTCACTTGGTTGGCAGATGACCATGAAAAGTAACTTGTTTG	246	chr2	39952509	39952754	+	none	none	0.28359	8.81632	0.00119055	2.5175	0	0	0	0	0	2.26872	0	0	29.3557	15.1219	21.7509	3.51254	5.83132	13.4963	13.9371	6.52705	11.3433	0	0	0	0	7.33739	0	12.8476
55644	TGATTAGTGAAAAGACTAAATTCAAATCTCTTTTATGTGTCATAACTTTTATGCAACGAATACAGATATAGTTCTTCCACTTCCTTGTATCAAGATTTACTAGTGAAACTGACATTTTTTCCTTTGGTATAGTCAGATTGAGTATTAAGTTTATCTTTCATGTCTATCATTATTCTAAGTTAGCTGAACATTGACTAGTATATTCTATTTTTCAAGGTCTGTGAATAGTTAGAGCCACATTACAAAGTCAGTACAAGATGTAACTTACTCATGCAACCAAAGGTCAAACCAGG	293	chr12	14915116	14915408	-	none	none	2.50438	14.2288	0.0011977	1.98989	0	2.41537	2.89748	2.58533	1.76312	4.53744	5.8363	0	4.73478	9.82923	15.5363	4.68339	5.83132	26.9927	4.35535	6.52705	7.56219	18.742	5.48447	4.17759	20.2182	76.5185	12.6127	3.85429
89743	TGGTAAAAGTCATCGCCATTCTCCATTCTCGATTAACCAGGGGCTCAATGCACTGTGGAAAGCCACAGGAACCTCTGCCCAAGAAAGCCTGGCTGTTGTGGGAAGTCAGGGACCCCGAATGGAGGGACCAGCTGGTGCTGCATCAGGAAACATAAATTGTGAAGATTTCTTGGACATTTATCAGTTTCCAAAATTAATACTTTTATAATTTCTTACACCTGTCTTACTTTAATCTCTTAATCCTGTTATCTTTGTAAGCTGAGGATATACGTCACCTCAGGACCACTATTGTACAAATTGATTGTAAAACATGTTCACATGTGTTTGAACAATATGAAATCAGTGCACCTTGAAAATGAACAGAATAACAGTGATTTTAGGGAACAAAGGAAGACAACC…	421	chr22	23888995	23889415	+	none	none	146.632	778.385	0.00121017	1.97177	66.0682	294.675	341.903	28.4387	29.0914	311.571	41.6878	59.6205	426.131	551.949	625.597	1546.69	1667.76	3104.16	1416.36	519.263	347.861	394.685	702.926	31.7497	166.8	308.171	331.872	312.198
15950	TGAATATCTGGAAAGCTTTCCCAAGAAGGACAAGTAGAAACAAGCCCAGACTGTGAAGACTGCAATAAATATCTCATTTTTAAATGCCCAGACTTGATGGACATTCATGAGCATCAAGACCATGAAGGAAAACTACCTCACCAAATGAACAAATGAACTAAATAAGGCACAAATGACCAATCCCAGAGAGATAGGAATATATGAACTTTAAAACAGAGAATTCAAAT	227	chr2	193338279	193338505	+	none	none	0.771363	10.074	0.00121104	2.37421	0	0	0	0	6.17091	0	0	0	7.57566	7.56095	14.5006	2.3417	0	18.8949	8.7107	0	6.61691	8.81977	10.9689	5.84862	0	31.446	17.3425	20.5562
71319	TGTGCCTGGCAGTTCTAAATGTATTCACTTATGAATCTATGAGATCTCCTATGAAGATTGATGGTAGCATTATCTCTACTTTCCAGATGAGGAAACTGAAGGACAGCAAGTTTGGGCAATTTGCTAACGACACAGCTTGTAAGTGGTATGGCCACTTGTAAGCCACTCCATTAGAAGCCAGAGCCTGTAAGCTTAATCACGTCCCCTCCCCACATACAGATACTAGTGAGAGAACCAACTTTAAATTTCC	250	chr8	128075025	128075274	+	none	none	1.6099	9.81739	0.0012509	2.02918	0	0	1.93165	5.17067	1.76312	1.51248	2.50127	0	9.46957	20.4146	22.7866	2.3417	4.66505	24.2934	7.83963	11.6036	5.67164	0	8.2267	15.0393	12.1309	6.28919	6.30636	0
69534	TACCACACCAGCCTAAATAATAAAGAACCAGCCACCAGGTTTCAGTGGAAAGTATTGCCTCAGGGAATGCTTAATAGTTCAACTATTTGTCAGCTCAAGCTCTGCAACCAGTTAGAGACAAGTTTTCAGACTGTTACATCGTTCACTATGTTGATATTTTGTGTGCTGCAGAAACGAGAGACAAATTAATTGACCGTTACACATTTCTGCAGACAGAGGTTGCCAACGCGGGACTGACAATAACATCTGATAAGATTCAAACCTCTACTCCTTTCCGTTACTTGGGAATGCAGGTAGAGGAAAGGAAAATTAAACCACAAAAAA	324	chr22	23884283	23884606	+	none	none	143.751	835.874	0.00127417	2.03559	85.1546	281.39	345.766	38.78	14.1049	336.527	30.0152	18.2708	441.282	730.388	983.968	1954.15	1439.17	2818.03	1583.61	580.182	313.831	271.208	814.444	20.8879	153.658	432.906	506.085	330.185
119027	ATTGCATTTAGTCAGGAATAAACAACATGGAAAGAAGAAATATTAATATTGAAAAAATATTTTAGAGAAAGAGATTAATAGTCATAAGATTGGTATAACGGGAATTTAGCCTGTCACTGTAGCCTATGAGGCACTGTGTGTTGCAAATGTGACACAATTATTCAAGCTGGGGATTGAATGACAAATAATGAAGCAAGAGATCTTAGGGAGTAAACGATATAAAAGATAATTGAGTCCGTGTTGCTGTACCCCGAAACTGCTCTAAACCATAAAGTTTATTAAATAATAGTAACAATTGAAAAATAGTAGAGGGAATGTGGAAGGATCAACTCAATCAGAATTTGGTGAGGGCATAGGAACTGAAGTCACGCTGTTCCACATTTAAGCAATGCCACATCC…	491	chr7	7579195	7579685	-	none	none	3.43446	22.6408	0.00131761	2.09612	0	0	5.79496	1.72356	6.17091	3.7812	10.0051	0	2.84087	12.0975	29.0012	2.3417	13.9952	6.74817	10.4528	60.9192	8.50746	19.8445	32.9068	64.3348	51.5564	3.1446	40.9913	2.56953
82423	CCTAGAGTAGTATTTTTATGTTTTATGGCTGGCTTTATAAAAAAGGGGTCCTGATTTCTGGGACCTGATTTGGGAAAGAGGAATTCTAGCTTCTATGACTAGTCTGGGGAAGAATGTGGGACCAGAGACAGGAGACCAAAAGGAGTCAGAGGAAAATTTTTCCTTCTAAGGCTGCTTCTGAGGCCTTCATTGTGGGGTATCATTTTCTGAACCCCAAAACTTTGAACTCAGTGTGTTTCACTCTCTGCTCTTGCTGTGTGACCTGAGGACAAATCACTTAACTACTCTGAGCCTCAGTTTCCTCATCTGTCTGACAAAGCTA	322	chr8	82599417	82599738	-	none	none	3.22746	20.6215	0.00137409	2.07019	0	2.41537	0	3.44711	6.17091	3.7812	10.0051	0	1.89391	4.53657	15.5363	5.85424	2.33253	21.5941	5.22642	23.2073	17.0149	72.7631	36.5631	51.8021	33.36	16.7712	18.9191	2.56953
105850	TATCATCCTCTCCCCCACTGGATATTAGAAAAAATACCACACATGGTGTACACCCACTGTGATATTAGGAAGAATATTACAGGGTGTACACCCACTCTGACTTTAGGAGAAACAGCTACCTAAAATGTCACAAACAATATCACAGGGTATACAGTAATATCTCCCTAGGATATTACAAATACTATTACAGGGTGTACACCCACTGCGATAACAAGAGAAATACATCCCAAGGACATTACCAATAATATCACAGGCTGTACACCCACTATGACATAAGGAGTGATATTTCCCTAGGATATTACGAATAACATCACAGAATGTACACCCATGGTGTGCACCCATGGTGATATTAGGAGTAATATCTACCCAGGACATAACC	379	chr21	44373166	44373544	-	none	none	8.90751	22.6566	0.00140955	1.27489	13.2136	6.03842	9.65827	6.89423	10.5787	7.5624	12.5064	4.80811	29.3557	43.8535	48.6805	17.5627	16.3277	13.4963	31.3585	19.5812	10.398	26.4593	23.766	25.0655	19.2073	13.6266	17.3425	6.42382
22064	AGGAGAAAATCAGCTTCCTGTTTGGATACCCACTAGACATTTAAAGTTCTACAATGAACTCACTGGAGATGCAAAGAAAAGTGTGGAGATGGAGACACCCCAATCGACTCGCCAGGTAAACAAAATGGTGATATCAGAAGAACAGAAAAAGTTGCCTTCCATCAAGGAAGCAGAGTTGCCAATATAGGCACAATTAAAGAAGCTGACACAGTTAGCTAAAAAAAAAAGCCTAGAGAATACAAAGGTGA	248	chr22	23886379	23886626	+	none	none	267.845	1333.48	0.00146489	1.91773	117.455	567.612	527.342	85.316	58.1828	629.948	74.2043	82.6994	771.77	1026.78	1392.06	2566.5	2395.51	5071.92	2575.76	1084.94	643.731	511.547	1122.49	51.8021	303.273	574.413	722.866	520.33
100931	CCAGGGCTCAGAACAAGTGAAGGGTTTGTTCAAAATCTCCCAGTTAGTCTGAAGCAGAGCAAAAATCACACACAAGATGATCTGAGTTCAAAACACAAGCTGTGGTCACTAAATGGTCAGAATGAGCTCCTCTGTGCTCTGAGAGCCTGGCAAAGACTGGGAATGAAATGGACTTCCTTGCCTTAAATGGAAGGTGTTGAGGAAGAAAGAGTTAAGGTCTCACAGAGTTTAACTAAAGGCAAGTTTTCTCTTCCCTCAGGAAGGAATCGTGGATCATTCTCCAGCTTTTTCTCTAGACCATGTTC	305	chr8	128163898	128164202	+	none	none	2.29733	11.8547	0.00147437	1.91616	0	0	3.86331	4.30889	0	3.02496	3.33503	3.84649	15.1513	24.195	29.0012	0	13.9952	8.0978	23.5189	15.955	7.56219	5.51236	5.48447	23.3945	5.05455	2.0964	5.51806	5.13906
39961	ATAGGAATTCTCTATAATTCCCAAGGACAGGCCATAATTGAAAGAACTAATAGAACACTCAAAGCTCAATTGGTTAAACAAAAAAAAGGAAAAGACAGGAGTATAACACTCCCCAGATGCAACTTAATCTAGCACTCTATACTTTAAATGTTTTAAACATTTATAGAAATCAGACCACTACCTCTGCAGAACAACATCTTACTGGTAAAAGGAACAGCCCACATGAAGGAAAACTGATTTGGTGGAAAGATAATAAAAATAAAACATGGGAAATGGGGAAGGTGATAACGTGGGGGAGAGGTTTTGCTTGTGTTTCACCAGGAG	324	chr22	23886060	23886383	+	none	none	157.896	841.15	0.0015097	1.96308	118.923	282.598	345.766	43.0889	20.2758	373.583	43.3553	35.58	462.115	631.339	904.215	1817.16	1510.31	2984.04	1749.98	598.313	383.781	361.611	734.005	20.0524	168.822	355.339	454.846	322.476
108737	TTTTTAAATGAGGTATGAATAATGCTAGTGTAAAATTTCAGTTTGCCTTTTTTAAAATTGTAAAATACTGTCCATGTTTTATACTCCTGAGTCCTGCATCCCCAAAACATTAACAGAGGGATCAATTTTTACGTGAGGTAAAGAAAGTTATATGCTTATATATCTGGAAAAATATTGTACAGTCTGAAAATCAAGGAGAGAACAGCTAAGTTTGAAGCAGAATTAGTTCAACTCCAGAGCTGCTCCCATCCCTTTCCACAGACACATTCTTGTCAGGTAATGCACCCTACACCCC	295	chr7	38336349	38336643	-	none	none	3.78029	22.6622	0.0015279	2.0337	0	6.03842	2.89748	2.58533	7.05246	3.7812	5.00254	2.88486	9.46957	3.78047	0	15.221	19.8265	12.1467	14.8082	8.70274	5.67164	104.735	47.5321	13.3683	21.2291	73.3739	6.30636	6.42382
61286	ACACTAATAATGGCAAAAAGATTTAAGAAATGTGTCCTGTGTGCCAGGTACCGTCTTAAGTGTTTGTTTTACATGCAGCAACTGATTTAATCCTTATAGCAACTCTGACAGGAACTATTATCCCCTTCTTACAGATGAGGAAATTTAAACATTGAAAGTAAGAAACTCACTATGATACAACTAGACAGACATTGGGGAAGCTGGGATGCAAACCCAGAATTCTGGTCCACAGTTCTTGCTCTTTACCACT	250	chr3	169804087	169804336	+	none	none	22.7999	64.6475	0.00152966	1.37488	13.2136	15.6999	33.8039	6.89423	36.1439	24.9559	39.1866	12.5011	62.4992	31.756	44.5375	52.6882	213.426	68.8313	56.6196	28.2839	72.786	89.3002	29.2505	44.2824	71.7746	83.8559	43.3562	41.1125
1417	AAATGTTGACTGGTAGAGCTGGAAGAGATCTCAGCAACTACTTTATAGATGAGGAAACTAAGACATAGAGAAGTGGATAACTTTCCAACATCATACAGCCTTTGAACAGTAGATTCATTGGAATAATTAAAACAGAAGGTCTTCTTTCCCTGCTAGGGGGATTTCTGCCATGAACCACTCCTCCTGTAGTACTCAAAGGTCTAACTTGGC	210	chr8	23526630	23526839	+	none	none	4.4302	17.6102	0.00154863	1.75063	11.7455	2.41537	4.82914	4.30889	3.52623	2.26872	2.50127	3.84649	35.9844	16.6341	58.0023	15.221	33.8216	12.1467	25.261	1.45046	9.45273	16.5371	20.1097	8.35517	5.05455	12.5784	4.72977	6.42382
29321	TAAAAATTACTATCAAATAAGAAAATTCCTTTGCTTGAACTTTATTTCTAATGCAAAGTTTATTGTGAAAATGGCATACGTGCTTGGCATTGCCTGAAACAAAGTTTAGATCCTTTCATCATCAAAAGCATTTACAAAGCATCTTCATGTGTGTAACTCTTGGCAAACTACTGTACAAAATGTTTCAACAGAGAAGCTGCTCTCAGCTAGAAGTTCACTATCTATGAATTAGTGTCACCTGTGAGCTATGCTGATCATCAAACAGAAACCAATTATGAAGTATGAAGGCTCACCACTAAAACAGTGTTCATGAGAAGTGATCCAGTTTCTACTGAACGGTCAAGTTGAATACATGCAGCAAAGATCACAATGGTAGGGAAAGCAGTACTTATCTCAAAT…	441	chr2	193334868	193335308	+	none	none	1.51738	12.5941	0.0015882	2.19235	0	0	0	2.58533	7.05246	0	2.50127	0	10.4165	3.78047	23.8224	0	0	18.8949	9.58177	2.90091	15.1244	7.7173	8.2267	15.8748	2.02182	46.1208	12.6127	24.4105
39595	AAAAAATATTGTACAACATTGCACCCAGTGTCAGATTCTACACCTGGCCACTCAGGAGGCAAGAGTTAATCCCAGAGGTCTATGTCCTAATGTGTTATGGCAAATGGATGTCATGCACGTACCTTCATTTGGAAAATTGTCATTTGTCCATGTGACAGTTGATACTTATTCACATTTCATATGGGCAACCTGCCAGACAGGAGAAAGTACTTCCCATGTTAAAAGACATTTATTATCTTGTTTTCCTGTCATGGGAGTTCCAGAAAAAGTTAAAACAGACAATGG	285	chr22	23885714	23885998	+	none	none	137.045	821.524	0.00159375	2.04218	80.7501	144.922	380.536	14.6502	11.4603	411.395	26.6802	25.9638	338.064	679.729	920.787	912.09	1624.61	3302.55	1757.82	728.854	419.701	319.717	792.506	21.7235	168.822	392.026	449.328	316.052
65560	GAAGTATGTTAGATTTTGCACCTGAATGAATGTGTAAGTCACTTCCCACAACCAATTCTGTTTTAGAGCGTTTTCAAGATCTGCCTTTACCTAGAAGACTGTATGACATTCTGGCCATCACAGCTCAAAATAATGTCTTTATAATTCCACAAATGTGATATGCATTACTAATGGACTTATTTTACTAAAAGCAAAGAGAGAAATCTATCACCTGAAATAAAGAAAACTAAGAATGTTCAACAAGTAATGCTCATCCTAAAA	261	chr13	95667393	95667653	-	none	none	7.86205	24.183	0.00160915	1.49244	19.0864	3.62305	2.89748	6.03245	11.4603	8.31864	6.67005	4.80811	17.9922	24.195	23.8224	5.85424	20.9927	26.9927	54.8774	23.2073	30.2487	50.7137	7.31263	34.2562	19.2073	5.241	29.1669	12.8476
123210	TGACATAATCCATGCACCAAGCATGTGGTAAGTGCTCAACTATAGTATTAACAGAAATTCATAGTGCCACTTTTCTTGTGGTTTATGATTTTTTTTATCTTTTTGTCAGCAACCCAAATACAGGTATAGAGACAACGAAGATAGGATTCATTCAGGGTACTGGTTTATCATGCAAACGCAGCAACAGGTCATGGAAGGTAAGAATTATTACTATCAAGGG	220	chr4	96080353	96080572	+	none	none	4.29714	16.8768	0.00168911	1.70738	5.87273	0	0	6.03245	5.28935	3.7812	6.67005	6.73135	9.46957	29.4877	23.8224	4.68339	5.83132	5.39853	17.4214	5.0766	15.1244	18.742	6.39855	12.5328	20.2182	42.9762	42.5679	10.2781
94141	ACTTAGTATGTTATGAGTATTGTTCATTCCAGCTAACCTGGCTTGTTTTATGACTATTTGTGTCCTGTTTTAATTTTCCTATTTTGCTCTAAGTCTTTGAGCATAATAACTATGTTTATTCATTTTGATATTCCCTATCACATCTAACACAGTATCTTCTGTGTGCTTATTCAAATAATGTGTTGAAGCACAGACTAGTGTCCAAATAAATAGTGTGCTTTTCAAAAACCTCCTTTTAATCTTCAGTGAAAATTTTTATTATCTAGGGCAAGTCTACGATCTTGTGCAAGAAAGTGTGGGATCGAGAATAGGAAATATC	319	chr8	82604294	82604612	-	none	none	3.29104	18.4679	0.00200754	1.95954	0	0	3.86331	2.58533	6.17091	4.53744	9.17132	0	1.89391	5.29266	31.0727	2.3417	5.83132	17.5452	6.96856	29.0091	17.9602	58.431	31.0787	36.7628	29.3164	11.5302	7.88295	2.56953
68409	AAGGTGGCTGGAACAACTTTATACATACAGCCTGAATGAACTGCCTCATCATTTATATGTTTGAGGAAAGTGTCTGTTTGATAATTTAAATTAAGTTTAAACTGTCATAAACGGAGAGCTGTACAGATTCTGTGGGAGAGGATACTGGGGTACCAGATACTCATTACTAGGCTCTCCACTCTGCCTTCTTCAATACTCTGGATCGGTGCCCTTTATTCATTTTTTTCACAACTTCCTCCCCTTTGCTCACATTCTTTACAAGCTTCCAGGATTTTTAAATTTTATTTTATTTCTTTCCACAATGACT	307	JH636052.4	2017949	2018255	-	none	none	11.5932	29.7011	0.0020906	1.2626	11.7455	6.03842	16.4191	15.512	11.4603	9.83112	15.0076	6.73135	18.9391	46.1218	55.9308	12.8793	13.9952	29.6919	29.6164	18.8559	40.6467	7.7173	22.852	41.7759	40.4364	45.0726	37.8382	12.8476
30790	TAAAAATAAGTTTGTATTTCTAAAACTGTGAAAAATCATCTCAGGTTGTACTGTTCATTTAAACCTTGACTTTGGCAGTGTTAGGCTGCTTGGAATCAATCAATGCCAAGATGCACCATGTTAATTGCAACCGAGAAAGGAAGTGGCAGGTGTTTCCAACCCTGATGAGCTGCAATGAAATTGATGTTTTCTGCATTCTGGA	202	chr11	12383073	12383274	+	none	none	4.7734	31.3981	0.0021012	2.07439	2.93637	7.24611	0	2.58533	5.28935	7.5624	5.8363	6.73135	135.415	12.0975	18.6436	9.36678	4.66505	22.9438	11.3239	10.8784	6.61691	27.5618	177.331	29.2431	5.05455	5.241	1.57659	24.4105
17260	AAAAAATTGGCAAAGAATTAAAACAAGCAAATAGGGAAGGTAAAATCATCCCACTTACAGTATGGAATGATTGGGCCATTATTAAAGCAACTTTAGAACCATTTCAAACAGGAGAAGATATTGTTTCAGTTTCTGATGCCCCTAAAAGCTGTGTAACAGATTGTGAAGAAGAGGCAGGGACAGAATCCCAGCAAGGAACGGA	202	chr22	23881230	23881431	+	none	none	244.897	1249.7	0.00212121	1.91491	139.477	514.474	530.239	78.4218	27.3283	535.418	61.698	72.1216	689.385	982.167	1271.91	2558.3	2402.5	4603.6	2453.81	918.139	569.054	447.603	1115.18	32.5852	257.782	582.799	605.411	504.912
90397	ATCAGAGGGTATACACGTATTGTGACATTAGTAGTAACATCCTGCTAGGATATTACGAATAATATCACAAGGTGTACACCCCGGGTGACATTAATTGATGGAACAGTCCCCTAGAATATGACCAATAACATTACAAGGTGTAGAACACCTGTGATTTATGAGTAAGAGTTCTATAGAATATTACAAGTAATATCATTCAGTGTGCACCCCGTGTGACATTAGGA	224	chr21	44371644	44371867	-	none	none	7.71079	24.076	0.00217894	1.46921	0	10.8692	15.4532	2.58533	9.69714	7.5624	11.6726	3.84649	16.0983	31.756	85.9677	15.221	18.6602	14.846	37.456	23.9325	9.45273	23.1519	22.852	22.559	16.1745	13.6266	14.1893	19.2715
38331	CTGTAATATTCTATGGAAATATTACTCGTAAATCACAGGGGCTGTACTTCCTGTGATATTATTCTTCATATTCCAGCGGAATGTTACTACTGTTGTCACAGGGGGTGTACACCCTGTGATATTACTCGTCATATCCTAGCGGGATGTTACTACCAATGTCACAATGCGTGTACACCCTGTGATATTATTTGTAGTATCCTAAAGAGATGTTACTACTAAGGTCACAATGCATGTACACCCTCTGATATTATTCGTTATATCCTCGGGGGATGTTACTCCTAATGTCACATGGGGTGTACTCCCTGTGATATTATTCGTAATATCCTAGGGGGATGTTACTTTTAATGTCACCGGGGGTGTATATCATGTGTATTCAACATCTGTGATACTATTCCTATA	399	chr12	52502771	52503169	-	none	none	15.9752	42.1737	0.00229197	1.31189	33.7682	13.2845	11.5899	27.5769	17.6312	12.8561	9.17132	1.92324	37.8783	64.2681	26.9297	37.4671	58.3132	41.8386	74.041	56.5678	41.592	38.5865	57.5869	40.1048	23.2509	10.482	15.7659	50.1058
44159	AGCGGTTCCATTTTCCCCCGAACATTCAGCCACTTCCCTGGAGCAATTTTTCCTGCCCCGCTGGGGACCAGCGAGTGGCCTAGTTGCGGCTGTGGCCCTGGACAGCGGCGTGAGGCCCAAACCTCTAGGTAGGGCCCAGTTGGATCCTGATTTTTCATTGAGCCAGGCAGTCTCAGCCCGAGTTGAAAGGCCTCCTTAGCCTTGGAACTAACGTCTCTTCACCCTGACTTCTGGGCAAGGGGAGATCCCAGGAAAAGGTTTACCTGCAGGTTTTCCAAGGCCAAAGCCCCAGCAAGGACCCCCTCTCCAACCTTTGTTATAGGGCTACATGGGGCCTGGGCTCAGCATCCTCATTTGGGGTAAACTGAGGCCCGGGACAAGCCCGGCAGAGCCTAAGGC…	480	chr7	97842311	97842790	+	none	none	27.6129	108.689	0.00229808	1.70356	42.5773	33.8152	21.2482	7.756	37.907	10.5874	45.8566	21.1557	45.4539	24.9511	27.9654	12.8793	58.3132	82.3276	144.598	89.203	61.4428	429.964	198.355	138.696	216.335	104.82	18.9191	84.7945
57362	AAGGGCCCTGAGTCTTTGGCATTGGGCTAGAAGGTGGCGCTCTCCTAGCATATGACTCAGGCTACAAGGGGATGCTTGCCTGCTGAGCACTGTCAGTTTCCTTGCTTAGAAAATGGAAATAAGAAGAATCCTGTCCATCTCAGAGGACTTTATGGGAATCAGATGAGAAAAGAGGTTCTGGGGAAAACTTCGATTTGCTATTTAGATCCTT	211	chr5	148254291	148254501	+	none	none	4.04274	11.8817	0.00231825	1.37111	0	4.83074	4.82914	5.17067	4.40779	6.04992	4.16878	2.88486	3.78783	12.0975	22.7866	5.85424	8.16385	10.7971	20.0346	6.52705	4.72637	13.2297	12.7971	10.8617	19.2073	12.5784	8.67124	17.9867
9315	CAAGTCCTCAGATTTATCAGTATTATATTTGAAGATAAAGAACTATCTAATAAAATAGAATAAAGACATTCAAAAGTTAAATTTTAAAAATTTCATCAGTGGATTTTAATTGGGAAATATGCATGTTTCAATAAACACTATAAATTGTTTCTGGAACCTGTGCATCTTTCTTTTGCCAAATTGCATTTGGAACATTTTTACAGAATTAATTGTACAACCTTGTTAATGAGTATTCTTTTTTGC	243	chr5	34159562	34159804	-	none	none	12.4558	37.5814	0.00243867	1.43953	11.7455	7.24611	15.4532	16.3738	14.1049	12.8561	14.1739	7.69297	25.5678	52.1705	157.435	33.9546	17.494	20.2445	39.1982	19.5812	49.1542	7.7173	39.3054	43.4469	26.2836	22.0122	32.3201	15.4172
53009	ATGCCAAACAATAATTGTTGCCCCTTGTCTTTCTTAAAAGGAGACTGCATCCATTTAACCAAACTAAGAAATTTTCAATTAGTCCTCTGCTGAAGTCATACTATACACATCTACTTAATTAAAGATACATTTATTGAAGAGAACAGGTCTCCTCCTGGTTTATCTGCTATAGCCTTGCTTAGGAAAGGAATAATAGTCTGTCTTTTAATTAGGTGTGGCTATTGATTGGAGCAAATGTTGTCAGGTGGCCCAAGCATGAATCAATGAGTGACCATGAGGTCACCCATCAGTGAGG	295	chr2	165751868	165752162	-	none	none	3.84225	19.2024	0.00252068	1.89463	2.93637	8.45379	6.76079	4.30889	1.76312	1.51248	5.00254	0	28.4087	29.4877	12.4291	33.9546	8.16385	48.5868	40.0692	1.45046	11.3433	13.2297	33.8209	3.34207	0	9.43379	28.3786	5.13906
47989	GAGCCTGGATGTGTATGTGGCATAGGTATAGCTTTGACCTAACAATTCCACTTCTGGGAATTCATCCTAAGAAAGTGATTATGGAAATGGATAAGGATCTTTCTACAAGCATTTCAGTGTGTCTTTCAATTCTAAAAAAAGAGAAAACTAAATATGCAACAAGGATATGGATAGATAACCCATGATATATTCATAAAGCATCATATTATATAGCCTTTGAGAATAATGTGGGGGACTAGGCATGTTGGCTCATGCCTGTAATCCCAGCACTTTCGGAGGCTGAGGCAGG	289	chr6	138480410	138480698	-	none	none	9.81704	34.2771	0.00254758	1.57709	5.87273	4.83074	18.3507	3.44711	5.28935	20.4185	11.6726	8.65459	50.1887	25.7072	110.826	78.4468	41.9855	13.4963	31.3585	26.1082	41.592	9.92224	18.2816	8.35517	29.3164	26.205	7.09465	29.5496
93215	ACTCACTGCTTAGTGAAATTGAGTGATTATTCTCTGGCCTCAGTTTTCTAATCCATAAAATGGGATAACAGTATGAATTCAGCAGGGTTGTATAAGAATTGCACAACATAGTGTGAATTAAGTACTTGGCACATTGTCCAACCCAAAATAGGTGCCCAACAAATGTTTTCTGGATTCACATGTAAAGAGACAATGGGATCTACTATGGAGAGTTGCTCTCAGTCCATCTAATTTACAGAGCAGCAATTCTCCAGAGGATTCAGCTGTACTTCTAACTGCTCAAATGGAAGGTTATCAACATCAGCTCACACACGCAAAAATTGAACTTATGGATTCGTTTCTTG	344	chr7	38308324	38308667	-	none	none	121.839	502.097	0.0025902	1.73792	89.5592	41.0613	361.219	22.4062	69.6431	290.396	85.0432	15.3859	204.543	328.901	570.702	316.129	134.12	332.01	436.406	778.17	602.139	773.935	424.132	446.166	2008.68	122.639	446.963	107.92
113481	AATTATATAAATATAATGTACAATTGAAAAATTACTCATATTTTATAACATGCTTTTAAAATTAGAAGCAAACTATATGGTGGAGAAATATACACTGTCTCACAAGTATAACAAGTAAAATACTATTTGCACTAAAAGCAAAGAGTATGAAATTAAGATGAGCACATTATGCCTAATTAAATTTATAGCATGCTCACAAATTAATATTTCTGTATATGTTTACTAATTTTGTATGAAAATCAGAAGCTTTGCTACACAGACAGAAATTATCAAGATTGTTTTCTTTTCTTCTGAAATGAGAAATTTAATTCTTATTTTCTTA	322	chr7	38290962	38291283	-	none	none	59.6411	263.358	0.00262075	1.79317	33.7682	19.323	197.029	9.47956	41.4332	127.805	42.5216	5.76973	73.8626	156.512	261.011	166.26	78.1397	159.257	253.481	328.528	319.502	424.451	212.066	260.681	1153.45	44.0244	256.984	65.523
55231	ACATTTTACCTCTGCAACTAACAAACCTTGTTTATTTCTCCAAGAAGCTTAAAAAGAGTTTGTGGAGTCGCACGAGGTCATGTATGGCACTTGTGTTCCCCTCTTCCTCTTCCAGTTACTAAAATAATCTGGTGAGTGCTAGTTGTCTTAGCCATAGAAGGAAAAGCAGACCTATCAACCAATAGTATGATAACCCGTAAGTCTCAGCATGGCTTGGGGACAAAATCTTTAGATTCACCATGGTTTTAATTTCCCATGA	259	chr4	170014992	170015250	-	none	none	3.90061	14.8778	0.00272565	1.63315	0	3.62305	2.89748	6.03245	1.76312	6.04992	10.8388	0	14.2044	13.6097	8.28605	14.0502	20.9927	21.5941	27.0032	20.3064	19.8507	7.7173	1.82816	5.0131	7.07637	36.687	13.401	6.42382
39750	TTTGAGACATTCTAAACAGAATGTGTAACTTCTCATATGTATGCCTCTCCCATCTGTGAACCTAGGCCAAAGTTGCAAAAACAATCATATTAATAGTAGAGTAGAGAAAAAGTTAGTCTATGGTTCTCAACCCTCGTGTACATTGGAACCATCTGGGAGCTGTGAACACTGTCGCTGCCAATGTTCCAGCCACCAGAGATTTGGATTTAACTGGTGGGGCCTAGGAATTGGTGTTTTTTTGTTTTGTTTTGTTTTTTACACACCTTCATGTGATTCTGATGTGAAGCTGGGTTCAGAACACTTATCTAGTACCTTCTAAAGAGAACTGACTTAAATTTACTTTCTTTTGAACATTTGCAGGGAGTAACAT	370	chr17	67539915	67540284	+	none	none	10.9269	29.4559	0.00278547	1.30779	4.40455	14.4922	10.6241	11.2031	19.3943	12.0998	7.50381	7.69297	49.2418	13.6097	26.9297	10.5376	69.9758	36.4401	35.7139	23.2073	27.4129	13.2297	60.3292	19.2169	31.3382	17.8194	26.0137	10.2781
90000	GGCAGGGACAGAATCCCAGCAAGGAACGGAAAGTTCACATTGTAAATATGTAGCAGAGTCTGTAATGGCTCAGTCAACGCAAAATGTTGACTACAGTCAATTACAGGAGATAATATACCCTGAATCATCAAAATTGGGGGAAGGAGGTCCAGAATCATTGGGGCCATCAGAGCCTAAACCACGATCGCCATCAACTCCTCC	201	chr22	23881402	23881602	+	none	none	172.999	934.833	0.00284338	1.93939	71.941	374.382	439.451	28.4387	15.868	385.682	44.1891	24.0405	502.834	759.875	977.754	1979.9	1773.89	3226.97	1864.09	753.512	440.497	330.741	836.382	21.7235	194.095	407.749	559.689	327.615
20002	GGATAATTTATAGAATGTAAATTTGATGTATGTATATCCAATCCATTTCTAAGTATGAGATATTATAGGCAAACATTTACTTTCTGTCTGAGTAGAACATTTCTCGCTGACAAGGGAGATGATTTTTATGTTGTTATTTGCATTTGCAAAAGAACACTATCTTTTCTTTATCAAGATGTTCTTGATCCTGTGTGAAATATTTTCAGAAAAATTAAAGAGAAATTAAACTTAGACAATTCCCTCTTATACACCTGAAGCAAGCCCCTTGACACTCAAATAGTCACATAATAATTCTTTCCTCTTTTTGTGGAAAAAGCCTATAATAAAAGCTAAATAAATTTAGTAT	346	chr5	34125962	34126307	-	none	none	2.9889	10.8918	0.00284936	1.63459	5.87273	0	1.93165	6.89423	1.76312	3.02496	2.50127	1.92324	5.68174	20.4146	33.1442	11.7085	5.83132	5.39853	3.48428	10.8784	13.2338	3.30741	7.31263	15.8748	19.2073	4.1928	9.45954	5.13906
105558	AAGACCATCATCTCACCATATTCAGAAGGTGAGATAAGATGAGGACCTATGGAGGGTACAATATTTCAACAGCTGCTACTTGGATTGGAATGAAAGCTGCCCACTGACTCAAGAAAAGGTTAGTGCAGAGTTCTAAAGGCCTAATTGATGCTGGAATTACTTAATTACTTTGTCTTGAAATCAGTTTTTCTTTAACACTGTCTGGTTAT	209	chr2	193323000	193323208	+	none	none	1.67399	18.6274	0.0029701	2.25557	0	0	1.93165	0	11.4603	0	0	0	20.8331	5.29266	39.3587	5.85424	0	25.643	7.83963	0	24.5771	16.5371	17.3675	16.7103	2.02182	62.8919	19.7074	33.4039
82144	AAACTTAAAGAATCTAGCTAAAGAAAGGGGACAAGAGGCAATGAATGCTGTGGTACCGTACAGAAAATGTCCAAGTTTATCATTTGATTTTTAATTTCTTTAGTACAATGAATTAGAAGTATTTCAATGAAGAGACACTAGTTCTTAGGATGAAAATTAGATTGGAAAATATATTGACTAGAGACTACAATTATATAAATATAATGTACAATTGAAAA	218	chr7	38307352	38307569	-	none	none	79.0652	327.769	0.0030102	1.7357	41.1091	26.5691	239.525	8.61778	48.4857	184.523	75.0381	8.65459	137.309	211.707	329.37	225.974	80.4722	232.137	289.195	463.421	426.318	526.981	292.505	281.569	1278.8	84.9041	302.705	80.9402
118287	AAAAAATTTTTGAGGCATCAAAAGCCCATTTAAATTTGGTGCCAGGAACGGAGACAATCGTGAAAGCTGCTGATAGCCTCACAAATCTTAAGCCAGTCACTTGGGTTAAAAGCATCAGAAGTTTCACTATTGTAAATTTCATATTAATCCTTGTATGCCTGTTCTGTCTGTTGTTAGTCTACAGGTGTATCCAGCAGCTCCAAAGAGACAGCAACCAGCAAGAA	224	chr22	23888496	23888719	+	none	none	123.992	675.996	0.00309774	1.94087	93.9637	240.329	254.013	18.0973	11.4603	323.671	22.5114	27.887	429.918	545.9	455.733	1801.93	854.871	2405.05	1358	553.349	272.239	265.696	803.475	9.19069	133.44	382.593	328.719	215.84
32661	AAAAACATTGTATTAAGATGTCTGTTTTTTATTTTTGTTGTTCTATGTGCTTTACTTAATCCTTTATCTTAATTGATATCATTTCTAACACCAACATATTGGTCCTAAGATTTATAGCCAATTAGTTTAGGGTTCTGTTCATATGTCTCAGGAAAAAAAGGTTAAAATCTTACCAAAAATGGTCAAGATATCAAATCAATTAAATCCAGTTGGAAACATCATAAATCTGAAATACATATTTAAACATAAAATGGCTATAACTATTTAGCTA	271	chr7	38308028	38308298	-	none	none	92.9668	380.647	0.00326473	1.72114	54.3228	27.7767	304.236	14.6502	56.4197	197.379	78.3731	10.5778	155.301	279.755	448.482	270.466	97.9661	207.844	295.293	512.736	487.761	522.571	393.054	297.444	1615.43	94.3379	302.705	109.205
58030	CTGAAATATTCTCTAAGTGGCCTGTTAGTGTATTAAAATTTCCTCTTAAACCTTTTTATTTTTATGTTTTTTTAAAGCTCCTAGTGGAAGGTTTGGCTACATAAACTGTATTTCATAAAGTTCGGCTCTGAAGCATAATGCCAATTGCACAGTTGCCCACATTGAGCTATGAATGGGCAGCGTTTGTAACCATGGATATGGTGAACTTAATGCGAGAGCCATATTCATCTGAGGCTTGCAAGGGTTGGACAGTGCCCTA	259	chr5	34161231	34161489	-	none	none	6.13938	21.8811	0.00332326	1.57885	0	3.62305	6.76079	13.7885	2.64467	8.31864	9.17132	4.80811	13.2574	21.9267	89.075	18.7336	18.6602	8.0978	18.2925	13.0541	51.99	6.61483	17.3675	20.8879	11.12	11.5302	20.4957	8.99335
75238	AAAAAAAAAAGTTTAGGGAGCTGGGAGATGAAGCCAAAAGAAATGTTTTGGAGACAAGGATTAGATTAAAGCTCAAACTTGAAAATCAATTTTGAGTAAGAGACTGATTGTGCTGCAGCGTGACTTTGATGTGGACTGCACGGAATAGAAACACACACTAGATACCTCTGTGGAGGCCTAGCAAAAGGAGCAGACGCAGGGT	202	chr4	102270178	102270379	+	none	none	2.32719	10.7921	0.00332393	1.84771	7.34091	2.41537	0	0	0	3.02496	5.8363	0	47.3478	12.0975	2.07151	10.5376	8.16385	14.846	7.83963	8.70274	7.56219	5.51236	3.65631	4.17759	4.04364	11.5302	7.88295	16.7019
40117	AGAGGAGAGTCATAAAACTTGATTATTTAATCATGATTAGGAAAGTTTGGTATATAACACAGTAGCCATATTTTATACAGTTGTGGCTACTGTGAAATAGGAAGCTCAGCAGCAGCCATTGGGAGTGTGCATGTCTTGGCCGTGAGTAATCTGAGTAAATTCTACAAGTATGTTTCAGTAATTGAAAACAGAAGACATTCATATGAAATTTGCCGAAAGTCCTATTCCCAGCGATTAAGTAATTATCTGTTATAAATC	258	chr5	34157191	34157448	-	none	none	4.54023	17.5035	0.00335826	1.65851	2.93637	3.62305	4.82914	6.89423	4.40779	5.29368	8.33757	0	12.3104	34.7804	72.5029	9.36678	4.66505	13.4963	7.83963	10.1532	27.4129	2.20494	9.14078	23.3945	21.2291	11.5302	11.0361	8.99335
25109	TAACAAGTCTGTGAGAGTCTGTTATGAGTATAAAATGAACTAAGTCCCTAATGTGCAATATGAAAAAATGAATACAAGATTAATCTCTCAGACTACCTTTCACTATCCAGTGTAGAGAGAATCAGTCCAGGGTAAAACTAACTTTATGTAATGAAGGATAAAAGGAAGAAATCAAATTAATGAAAATTGATGCATGGATTAGAAAAAAAATC	212	chr5	34162052	34162263	-	none	none	16.5715	47.0174	0.00370162	1.36302	11.7455	8.45379	14.4874	22.4062	23.8021	15.1248	25.0127	11.5395	20.8331	70.3168	172.971	39.8088	29.1566	25.643	62.7171	20.3064	63.3333	12.1272	31.9927	66.0059	45.4909	27.2532	38.6265	25.6953
94102	GAAATAAAAGTAGTATCCAGGCAACAAGGTCAACATCCAGAGAAAGGACAAAGATAAACACAGAAAATGATGTAATGAATGTGAGAGAGTTAGGATCCCGTGGAAGCCAGACCCGGGAGAAATGATGACTGCAGCCTGGTTGCAGTGGATTAAGAGCTGGTGAAATCACACGGATAAACAACCCAGTGGATGGCTATGAAGGAAAGTAAACACCTTTCTACTTTTTTTCTATAACTCACAGTAGAAAATATGCTTTACATTATCATCCAG	270	chr6	138479389	138479658	-	none	none	9.8048	35.905	0.00375042	1.60503	0	7.24611	17.3849	4.30889	7.93402	24.9559	10.8388	5.76973	34.0904	26.4633	102.54	93.6678	27.9903	10.7971	38.3271	31.91	49.1542	14.3321	10.0549	5.0131	31.3382	23.0604	20.4957	55.2449
35206	TAAATTCTGATTGCTCTTATTTTCTTTATTTTAATTAACTAATTAATGTTCTACTAGAGTCTTCTCAAAATATTTTCATCATTTTGCAACATTTGGTCAGGTTTTCTTCAGTGAGGATTGGGTAGTTATCCAAGCTCCCATGTTTACCAACTTTGTGATCTGGGACGTCATGCGTGCCACACTGTTCTTGTCTATCAGAGAGAGATAATAATACCACTGCCTCTCAACGCTGGTGAGAAGTGTGAAGGAAGTAATGGAAGAAA	263	chr7	38336967	38337229	-	none	none	2.45694	18.0665	0.00433665	2.06163	0	4.83074	1.93165	0	1.76312	5.29368	5.8363	0	5.68174	2.26828	0	7.02509	34.9879	18.8949	12.195	2.17568	1.89055	83.7878	38.3913	7.51966	17.1855	49.2654	3.94147	3.85429
55111	ACAATCACAGTGGTTTGCTCTGTGATGCCTATTTCTTTCCAATGTTTTTAGTTTTGTTGCTTAAAAATTCTGGCTCACACAAATAAGTTGCTGTGAATGCTATTAATAACAACAGTGAACTCTGTTTAGCAATGGAAAGTCTTCTTTAATCTTAATCTAAAATGGCTATAAACTTATAATCATTCTTCAATGTATTAAAGTATTAGAGATTAGCTTTCTTCTTTGAGTATCAA	233	chr6	138478993	138479225	-	none	none	11.4411	37.6726	0.00486058	1.50201	7.34091	6.03842	18.3507	4.30889	7.93402	23.4434	18.3426	5.76973	46.4009	30.9999	137.756	85.4719	24.4915	16.1956	40.0692	34.0857	38.7562	11.0247	13.7112	9.19069	30.3273	26.205	11.8244	46.2515
105269	CTGTCAGTTGCATAAAAGTGCATCCTTTGATGCCTGCATACACTTAACAGATGATGTTCAAGCGTGTCATGTTTGAGTTGTTATTGTGCAAAAGAATTAATTGCCACTTATTTTAATTTGTTATATTTCCATCCTAAAGGATGAATCTCCCAAGAGGGCCAAGAGAGAAGGTGGTTTGGCCCCTAGTATTCTGTTAATAGATGAGAGAAGCAATTTGTTC	220	chr11	12382083	12382302	+	none	none	5.01334	26.6017	0.00491909	1.89891	13.2136	6.03842	0	1.72356	3.52623	6.04992	6.67005	2.88486	108.9	17.3902	24.8581	8.19593	5.83132	12.1467	6.96856	9.42796	2.83582	29.7667	128.885	30.9141	5.05455	11.5302	2.36488	20.5562
68228	TACATATTTGGCATAAACTAAAGTCTAAGTAATGTGAAATATTAGTGTTCTCATTAAGTGGAATTATACAACCTGTGTCTGCCTGTATGTGCCTAATAAGTATAAATTCTATTCTGTATATTCTTTAGAACTATAATATGACTTAGAAGTATAATTTTAAATTTCTCTGCTGATTTATCAAGAATCATATTCACTATAACCATGTATGCTGAGAACAACTTTTT	224	chr6	138477576	138477799	-	none	none	7.47572	26.7578	0.00509771	1.56469	0	4.83074	12.5558	5.17067	5.28935	24.1997	5.8363	1.92324	35.9844	23.4389	99.4326	59.7132	19.8265	16.1956	22.6478	17.4055	21.7413	8.81977	11.883	8.35517	27.2946	22.0122	10.2478	23.1258
118652	AAGTAAAATTGTCCCTGCCAACATCATAGAATTCAAGTGAGAGATTAATGATGTCATATATAAAGCATCACTTTGAACTTCAGAAAGTCAATTAAATTTAAATTTATAAAAAAAAACAAATACTCAAACCTTTCTAGGTTTCAAGTTTCTATCTAAGCTGTAAGAAAAAGTTACAATATAGTCGTATGTTAAAGTACATGAGTCAATGATA	211	chr5	34138508	34138718	-	none	none	3.84376	14.6243	0.00521568	1.63472	2.93637	2.41537	4.82914	6.03245	4.40779	3.7812	2.50127	3.84649	6.6287	18.1463	77.6817	7.02509	4.66505	4.0489	9.58177	13.0541	20.796	2.20494	10.9689	22.559	8.08727	5.241	7.88295	15.4172
3712	CCTCTTTCTAGACTGTGTCCCTCTGAAAGGGATGCATTCAGATCCAAGCAATGTGCTCCCCCAGTGGGCTGACTTAGGTGGAAAAGTTAAAGAAGTCATTTTATATTTATACACCATTCAATTTCAACTTGGCAGTCAGAGCAGCACACACAATGTCAACGCAAATCGAAAGAGGCCTCATAACATACAAAGTTGATTCTCTCTTATGATTCTAGCTAAGTAGAATAAACTCCCAGG	237	chr5	148243957	148244193	+	none	none	3.52833	9.74847	0.00553184	1.33369	2.93637	2.41537	5.79496	4.30889	3.52623	3.02496	3.33503	2.88486	2.84087	15.878	14.5006	7.02509	10.4964	0	17.4214	6.52705	6.61691	13.2297	13.7112	13.3683	9.09818	8.38559	7.88295	8.99335
17674	ACTGTATGTTTAAGTACTGTATGTTACTGTGGAAACTTACCCATTTTCCCCTCAGAACAACTCTGTCTCAGGAGGTGAGTCTGAGAGCTACTGTTTCTTTGTAAAGGTTTTATCTGATCAGGCCCACGGTCACCACGTCAGCCCCACTGCCCCTAAATAGTTTGAATCTTGATGTTTTGATTTCAAAGACTTCTGATTCTAGCTACATAGCTTTGTCCATTTCCCACCTTACCACTATTTACTTTGAATTTTGTTGCATGCCGAGACCAGTGACTGCCACAAATGTGACTGTTCCTAGAATCTGCTTTCTGCTCTGATCTTTAGTCAGTGCGCAGACTCTAACA	344	GL339449.2	669488	669831	-	none	none	16.1739	43.6444	0.00574539	1.30306	10.2773	13.2845	17.3849	31.024	16.7496	13.6123	11.6726	15.3859	16.0983	53.6827	116.005	21.0753	20.9927	28.3423	56.6196	9.42796	62.388	16.5371	21.9379	67.6769	53.5782	45.0726	78.0412	30.8344
80374	AGTGGTTTACAAAGCATAGACACTTACTTCTCTCTTCAATTAAACCCTGAGTCAGTGGTTGAGGTTGGTGCAGCAGGTCCCAGGAGATTAAGTGACCATATACCTTAAATGTTACTGTTTCCTCATCCCATAGGGGGTTGTTCTCATTTGTGTGTCTCAAAGATATGTACCAGGCACATTGTGTTCTAGCCCATAGGAAGAGGAAAAGAGAGTAGAGGAGTCCATGCCTCAGAGGCAGAAGTTACACAAATCTCATATATTGCATTGGTGAAGACAGAGTTGCAGAGATATACCTGAGTAATCACAGCTCTCTTCCTATGGCATAGGGAGGGGAATCATTAG	342	chr6	138478137	138478478	-	none	none	12.6633	48.7218	0.00596892	1.63399	2.93637	6.03842	20.2824	5.17067	9.69714	34.0308	18.3426	4.80811	53.0296	35.5365	216.473	122.939	31.4891	25.643	48.7799	22.4821	55.7711	8.81977	12.7971	12.5328	42.4582	45.0726	11.0361	34.6886
17956	AATCATCTAGAGACACAGTGAGAAGAGGAGAAACCACGACAATAATATTAGTGAAGAGCAATGACAAAGGACATGGGAGGAGAATTAACAAGGGAGAAAATAGAGATTACAACCCCAAATCAACACAGTTATGCTGGTTAAGCTGCAGGCCTGGTTCTGAGCCTGCCAGCACTCAGGGAAGGTTACCTGAGTTTCATGGCTGCCATTGTGAGAATGAAGAAAATATATCAGTTTCTCAAAAGAACACCAAGTTTTCCAAGGACTAAACTCTCAGCAGAATGGCTTACTTGGAAAATTACATAGGGAACATGAGTAAAACTGGG	323	chr2	165750977	165751299	-	none	none	4.40848	19.9391	0.00680747	1.76615	4.40455	9.66148	1.93165	9.47956	1.76312	3.02496	5.00254	0	41.6661	31.756	9.3218	28.1003	6.99758	44.5379	40.9403	2.17568	9.45273	20.947	43.8758	4.17759	0	6.28919	23.6488	5.13906
45526	ACACAAAGATCAATACCCAGAAGGTGAGAGGAATCAAGTTTTCATGGTGGTCACATCAACATATTGTTCTTCATTCTAATTAGACTGGTTCATGTCATACATCAATTTTTGAACAAGCCACTGCAACTACAGAAATGCCATATGATGATTGGCTGAGAGCTGAATTATGTGTCCCTCCCATTCAATTTAAATTTATCAGTGTTTGACCTATCCCAGACA	219	chr2	193331649	193331867	+	none	none	2.13089	16.7398	0.00837178	2.01783	0	0	3.86331	1.72356	11.4603	0	0	0	14.2044	3.78047	37.2872	0	0	22.9438	14.8082	2.90091	16.0696	17.6395	10.0549	23.3945	3.03273	54.5064	8.67124	38.5429
51687	GGGAAGACTGACTATAAACAAAATATATGTAATAGGTGGTGGTAAGTACCGTGGAGAAGTAACAAATGGGGCAAAGTGAGTTATACAGCTCCATTCTTAGAAACCTTGGAGTACTTTTCTTAGTTTATACTCGTGGTGGTTTCCTTTTGTCTCCTTTATTACATGGGACTCTGACATGTGCCCATAGCTAGGGTGACAGTAGGATCTACCCGATAGTAGGGTGGCAGTAGGATCTACCCAAAAAGCGTCCTGCTGATACAGGACCAAAGCATCCTGTTGTTCTCGAGCCTATAAAAAGAGCTAATGGTCTTGCTTCTCTTAACTGTGGCCTCCTACACTGTGTTTTGGATGATTGGTGATGTCTTGGATATTCTGTTTCTTTGGAACTTTGAATATACA…	429	GL339449.2	657254	657682	-	none	none	57.742	144.99	0.00940709	1.21655	38.1728	47.0997	86.9244	90.4867	52.8935	42.3494	61.698	42.3113	96.5896	144.414	619.382	140.502	62.9782	85.0269	189.893	125.464	114.378	33.0741	74.9544	158.748	158.713	99.5789	130.069	86.0792
20006	CCTGTGATATTTTTCATAATATTTAAGGGAGATACTGCTTCTAATATCACAGTGGGTGTACCGCATGTGTGTATACTCTGTGACAGTATATTTTATATCCTAGGGAGGTATTACTCCTAATATCACAGTGGGTGTTCACCCTGTGATATCATTCTTATTTGACCTTGCTGCCTTTTTTAACCCACACTACAAAAGGAATGGAACAGATAAGAAGATATTGAGATTAGACAGTGCTGCCGTGCGGCCGCCGCAAGACACTTTTAATATCCCTGTTTCCCAGGCTGTAGATAAAGGGGTTGAGCATGGAG	308	chr12	52501966	52502273	-	none	OR7E47P	17.1487	44.2331	0.00413104	1.28371	48.45	13.2845	5.79496	12.9267	15.868	13.6123	16.6751	10.5778	29.3557	54.4388	54.8951	32.7837	41.9855	37.7897	80.1385	60.1939	45.3731	25.3568	81.353	57.6507	7.07637	18.8676	25.2254	55.2449
75058	TAACAAGAGGGCTCAAGAAAGCTTCACAAAGGGGGAACAAGCTGGTCTTAAAAGGTAAAGAGAAGTTTGTCAGGAGTAGAAGGGATGGAAAAGCATTTCAAATAAAAGGAGCAGCTTGTACAAAGCAGAAAAGTGTGTGCCAAGGAATGATATGAACTCATGAACTTCAGTGTGAGTGGACTATAGGGAACAGTGTTATAAAATGAAGCTGGAGAAGAAGGTTGGCCTGAGATTGCAAGGGGACCAAAAATTCTGTTAAGAAGCTAAGCATTTTGACCATGGGCAGCAGACAGCCCCAAACATTTTCAAGCAGGGACATCACATGAGAACCAGTTTTTGGACGGTAACAATGTAAGTTATTAATGCCATCAAGAAAAGGAATAAAGGCATAGAAAGTTA…	537	chr4	95544091	95544624	-	none	PDLIM5	4.71921	49.3506	5.51363e-13	3.0783	8.8091	4.83074	2.89748	1.72356	9.69714	4.53744	3.33503	1.92324	65.34	36.2926	32.1084	50.3465	68.8096	90.4254	39.1982	15.2298	37.8109	54.0211	24.6801	40.1048	77.84	105.868	18.1308	33.4039
39353	GGAAAAGGCTCACAAAAATGCTAACCTTCTGAAATTCATACCTGCAAAGGGCAGGCATTTCTATTTTGGGGGGCCACCACCAGTCAGAAAACTGGCTCAATGAACAACGGGTCCAGATCTATCAAAGCATTGCTTATATTCTAATGAATTATTCATTCTCATTTTGTATATGATTAAACTAAAATTAGAAAACTGATGTGTTCCAACACAGAAAGGCTCTTCATGACTTTATGACTGAATTTGTGAAAAACATTTCATTACATTTGTAAGATAGTAATATTTTATACATACATTTGTATCTAATGAACTAAATTTACCTAAGCTGCTATCCATAATTTAAACAGGAACGCATAAACACATGATGAATCCGCTATCACCTTCTAAATCAAAAGACTTTTT…	1542	chr4	95542231	95543772	-	none	PDLIM5	11.9896	96.1895	3.47185e-09	2.6793	13.2136	14.4922	5.79496	12.9267	29.0914	10.5874	5.00254	4.80811	155.301	85.4387	46.609	79.6177	110.795	157.907	93.2045	18.8559	118.159	50.7137	52.1025	43.4469	97.0473	330.183	55.9689	43.682
21642	AGATGGGGTTTTGCCATGCTGCCCAGGCTGATCTCAAACTCCTGGGCTCAAGTGATCCTCAGGAGCCACCGCACTCAGCTATGATCAATTCTTAAAGCTATCACATTGTGAAAAGTGGCCCCTTGGGTACTCAATCAGCATTCATCTCAAAACTGATGAAGAACGACTAGAAATTAGAGGGCTAGGTGAAGAAGTACATTCTGTACAGAGTGGTAAGAACTTTCAAAAGCATGGTAGTATGCCATGTCTTGGAAACTGAAGATGGTTTAGTGCAACCAAGCACAGATTATAAATTGGGTGAAGCAGGAGATGAGGCTGAGAAGTTAGTAGGGGCCAAAGTATAAAAGGTCCTAAATGATTTGTTAAGGAAGGGTGGGATAGTCAAGCATCCACAGCAGA…	651	chr4	95540867	95541517	-	none	PDLIM5	0.934426	15.2876	5.91435e-09	3.28099	0	4.83074	0	0	2.64467	0	0	0	19.8861	9.82923	11.3933	7.02509	16.3277	18.8949	27.0032	2.90091	30.2487	8.81977	9.14078	11.6972	13.1418	36.687	12.6127	8.99335
44070	GGCTCTGTCTCGACTATAAAATCACCTTGCCCCAAACAAATTTAAATTATAACTTAGGAGGTTCATGGACTTTCATCCATTCTGGAAACAAAGAGAAAAACCAAATCAAATACCAGAATCTGTTTTCTCACTGGGCAAATAGCAACAGGATCCACAGTTTTACCACAATTGTTTCCCTGTCTCCATGTGGTATCTACATAATTCTTTTCCCAAAGGAGGAAATCAAATAACAGGCCAATCTGAGTAATTAAACTCCCCTCCC	262	chr4	95586995	95587256	-	none	PDLIM5	1.18888	19.8621	8.56191e-09	3.20764	0	0	0	0	4.40779	1.51248	1.66751	1.92324	48.2948	15.878	5.17878	5.85424	16.3277	40.489	26.1321	3.62614	13.2338	18.742	33.8209	21.7235	31.3382	15.723	4.72977	16.7019
22240	TGCTGGGATTACAGGCGTGAGCCACCGTGGAAAAAAAAAAAAAGAAAAAAAAGAAAGATCACTTGCTGTAGTATGGAGGTATGGGGGACAGACTGAAGGAGGGGAAAGGAGACAGGGAAATTAGAAGTCATTTGTAATGAAGAGGTCATGAATCAAAGCAATGGCTCTGATGACACAGAGAAGAAATTTGAGAAATAATAAAAAGTAAAACCATTAGATGTTAGTTACTGTGAGAATGTGGGGCGTGGGGTCTAAAAGTCTACATTCTAGCTTTGGTGACTGAGTGGATGTGCAATTCCCAGAGATAGGAAATGGTTATTTTCAGACATACTGGATTTGAGGTGCCACCAGGAGATGGCAAATAGATCACTCAGTTGGAGAGAAAGATCTGTAAATTAT…	1748	chr4	95538799	95540545	-	none	PDLIM5	7.53868	40.0382	1.95554e-07	2.1896	7.34091	4.83074	10.6241	1.72356	16.7496	7.5624	6.67005	4.80811	55.8705	45.3657	36.2515	33.9546	43.1518	49.9364	66.2013	10.1532	70.8955	24.2544	44.7898	21.7235	70.7637	10.482	36.2616	20.5562
807	TGTTGCTCAGCCTGGTCTTGAACTCCTGGCCTCAAGCAATCATCCCACTTCAGTTTCCGAAAGCACTGGGATTACAGGTGTGAGCCATCATTCCCAGCCCAGTTACTCCTTCTACTCACATACTCACTCATTCATAAATATTTAAGCACCTACTATATGCCAAACGTTGGTTGTGCTATGCACTGGCCACAAAACAATAAACAAGAAACAACCCTTGCCTAACAGAACACCCAGTGTTATGCATTCATAATAAAGGGAAAAAAGAGACAAGACTGCCATTATCTTCTCTCAACCAAGAGTTACCTGTTTAAACAGCAGGTCTTATCTATGCTAGTTCCAGTTTGGTTTTGAAGATCATATGGCCTTTATTACCAAGTCATTTGTGATTTATAACTACAT…	440	chr4	95538335	95538764	-	none	PDLIM5	1.92645	20.6085	1.2465e-06	2.76256	0	4.83074	2.89748	0	6.17091	1.51248	0	0	23.6739	13.6097	6.21454	15.221	13.9952	13.4963	15.6793	4.35137	43.4826	19.8445	14.6253	18.3814	39.4255	74.4221	9.45954	3.85429
122161	GTTATCTGATTGTTTTACCTTTCATATATAAAGGATTTTTGGTTTTACTGTTGGTGGGTGTACTTTTTGTAAACATACCTGTGATGCTGCTCCAACATCCCTGCTAAGAGCTTTGCTGATTTTAACAAGTATGTGATTCCACTGCTGTAAGCCAAGGGTAAACTTGATTCCACCAAATTTGCTTAAGTGTTACTTCTCTGTATTAAAGCTTCAAGTTCACTCACTGTCTAACCAATGATACACAGCTACCTGAAGACATTAAAATCTTTCAGAAATTTATTCTCAATTTTTTTCTTCTTATAAATTACTAGCATATCAGGATAAAGAATAAAGTGTGTGAAGAGGCAAAATAAGTGTGTACCACTAACTTGAAAATTCCGCAACAGGTGTCACCTTAGT…	653	chr4	95517952	95518604	-	none	PDLIM5	0.702252	11.6936	1.33063e-06	2.99643	0	0	1.93165	0	1.76312	0	0	1.92324	11.3635	12.0975	5.17878	2.3417	19.8265	0	11.3239	8.70274	19.8507	12.1272	2.74223	15.8748	30.3273	27.2532	5.51806	2.56953
108010	GGCTGGCAGATCACCTGAGGTCAGGAGTTCGAGACTCATTTCCTCCAGACTTGGTCCCATGCACCTTTTTCCTTTGCTAATCTTGCTGTGTATTCTTTTGCTATAATAAATCTTAGTCAGGAGTGCAACTATATACTAATCCTGTAAGTCCTTCTATCGAAACAATAAACCTAGGAGTGGTCTTGGGGCATCTCTGACACTAAACAGTTTTGAAAAACAGTAAGAATGATTTTCTTGAAATATTGCTCCCTATTCTTGTTCTCTCAAATGCAAGTGTCATAGAGCCATCAGCTTTTATTATTTTTGATCAGTTTAACTTAAAAAACTAAAACCTGCTTGATGATAAAACACGCTATACAATAAAAAACTTTAAGCACTTTAATAATCTTTATCATAAAT…	519	chr4	95537666	95538184	-	none	PDLIM5	3.09541	28.0182	2.38477e-06	2.61136	2.93637	0	2.89748	7.756	6.17091	0	5.00254	0	20.8331	23.4389	12.4291	10.5376	16.3277	13.4963	40.0692	7.97751	45.3731	18.742	26.5083	16.7103	43.4691	126.832	16.5542	8.99335
114881	CAATTCAGTTTTAAAAACACACAATACTTCTTAAAGTTCCCACAGAATAAGTATCATATAAGCTAAAGAAATTTCAATTTTTGATTGTACCTTTTGTACACAGGTTTGTATACGTTCTCTCTCAGAGGCCTAAGATGTTTAAATCTTAAACAGTACTCTTTAGCTACAAAGGGCTTGGAGTAGACTATAAAGAATTCATAGAAATCTAAGTTATTACCAAGGCAGTTTTTCCATTTATGCTTAAATCCAGAATTGATCTGAAGTTCAATTTTCTCTGAGGATAAAATTTAATTGAACCATTTAATGTTGTAATGGAAGAATATTAGGGTTTATCTAGACAATCATATATCTGAATATATGATGCCCAATCCCCTAAAAATCTAACATTTTTTCCCTAAT…	491	chr4	95535522	95536012	-	none	PDLIM5	0.89768	12.516	3.49163e-06	2.84158	0	0	1.93165	1.72356	3.52623	0	0	0	9.46957	9.07314	4.14302	4.68339	3.49879	16.1956	15.6793	2.17568	15.1244	5.51236	11.883	9.19069	17.1855	61.8437	9.45954	5.13906
17111	AATTTAATTCCAGGAGAGCTGCCAGACAAACTGACTTAAAAGAGAGGAATTCAGTGTCAAGCTTAATATAGTTTGGGTGAAGGAACTGGTAATAGTAGCCCAGGTTATGAAAAAACCTAGAGAAGCATGACAGCCATCCTCAAATGTCTGACCTGCAGATTCACTCTATGTAACTACATTGTTTGCCTAATTTCAAGGAGTGAAATCTACAGTGAGATGGATTTGCTTCAATAAAAGGTGATTCCTAATATAAAAAAATCCTCCAAAGGAAAAAAATCTGTTCCTAATGAGGCTTTCTGTGAGAGCCCTGTCACCAGAAGCCACTTAAGCAGAGGATGGAATGCCGCACAACGAATTTAGCCATTTAGCCTGTGGAAGGCTCAGTTATATTTCAGCATG…	787	chr4	95536402	95537188	-	none	PDLIM5	1.00788	15.4442	4.12563e-06	2.8912	0	0	1.93165	1.72356	4.40779	0	0	0	12.3104	9.82923	14.5006	0	9.33011	18.8949	17.4214	2.90091	16.0696	5.51236	18.2816	10.0262	24.2618	73.3739	11.8244	2.56953
65431	TACGAGCATCTTTTAAAAGCACTGTGGTGGACAAATTATTTTACATCTCTAAGCCTCAGTTACCTGTACTTTAAGTGTACCGAGTAACATTTTGCTCATAAGATTTCTACGAGGCTTAAATAAGATAATTATGTATAAAGTGCTTAGCATACTCTAAGGCACAGAATATAACCTTAACATATTAAAAGGATAATTACATAATTACCATATTCAAATAATAAAAGTAAGCCTTATTTTCAACATTTTTACTCATTACAAATAAATGATTTTTGAAATACTTATATAGAGGTCATTTTCATTCTGGGATTAAATTACCCTTGCGGATTTGATTTTTAAAACTAATT	344	chr4	95537332	95537675	-	none	PDLIM5	1.63086	16.3975	1.11833e-05	2.61526	0	3.62305	1.93165	0	2.64467	1.51248	3.33503	0	15.1513	7.56095	8.28605	3.51254	10.4964	12.1467	20.0346	1.45046	28.3582	12.1272	17.3675	6.68414	12.1309	89.0969	10.2478	7.70859
25918	GTAAAAGAGAAACACAGTGACTATCGTCTTAGAATACTCAAAACTGCAGACATTAACAATCCTTCCTAAAATTTGGAAACACTGTATTTGTCACTCTTAATTCTTCATTTCCAGTGGATTATATGCAAACTTTCCAATTTGGAACATTAAAAAGTAATTCTTTCGCTGAATGTCAACTTTAACTTTCAGTCCTTTAACATACTACATTTAAAGGGTTGTGAGGCCACCTATAGTTTTATATCTGAAAGGCATAAATGACTTGCTTCTCCAAAATAAATGCACAGGTAAAATGAGTTTAAACATAATAGTAAATAAAGAGAACAAGTTCTAAAGAAGGTAACCTTAATTGACAATTTTTTA	360	chr4	95570982	95571341	-	none	PDLIM5	1.18915	19.8775	1.39974e-05	2.8619	0	2.41537	4.82914	0	0	2.26872	0	0	112.688	28.7316	20.7151	7.02509	3.49879	66.132	2.61321	5.0766	13.2338	4.40989	7.31263	5.0131	11.12	14.6748	5.51806	10.2781
34578	CTTCTTTATGCATCTTGTCTCCTCCACTTCATTATAAACTACCTGAGGTTGGGGACTTTACTGTGACTGTGGGTAAATTATTTAAACTTGGTAAATTTCCTCACCTGTAAAATGGTATAAAAATACTACCTTTATCCCAAGATTACTGTTAAGAATTAAATAAGATATGAGATAATACATGCAAATTACTTAGCACAGTGCCCAG	205	chr4	95536208	95536412	-	none	PDLIM5	1.67775	16.4554	1.73772e-05	2.57139	0	0	3.86331	6.03245	3.52623	0	0	0	7.57566	10.5853	12.4291	9.36678	10.4964	5.39853	15.6793	6.52705	22.6866	15.4346	10.9689	13.3683	31.3382	78.6149	10.2478	2.56953
15532	AAATAAACAGGGACTGAAATGAAATAATAGATTGATATGACTTCTATCTTAAGAATACCAAGGTTTTTGTTTCATTTTTTCAAAAACTGAAAATAGAGACAAGTACACTAATAGAGCAAAAGTTTATTTTCAAGATGGAGCTAATGAGGAAAAACGAAAAGGAAGAAAGTTAACCTCAGTGTCAGCAACCTGATTTATCTTGAGTTTACATTCCTTTCCCACATTTGTTTAACTGTTGCAACAAATAAAGCTCAGATACAGATTAAGAAT	270	chr4	95534525	95534794	-	none	PDLIM5	1.93063	17.2614	2.20556e-05	2.49998	0	0	3.86331	5.17067	3.52623	0	0	2.88486	17.0452	12.0975	7.25029	3.51254	11.6626	5.39853	23.5189	14.5046	23.6318	12.1272	6.39855	5.84862	37.4036	78.6149	9.45954	7.70859
111422	TTCTTTGCATAGCTTATTAAGAATAGCAGCTTTAGGTAATATACTCAACTAACGTGTCTTAATAAGGATATGTCACAAGACACCAGTATGTTTGTGAAACACAGCAATAATGAAGACATGGGATGGGTCAGCAAACTATTTCTTCATTAATCTATTTTGTGTGGGTCAATGAATATCAACAAAGTTTTAAAAAAACTTACAAAACAGTATGTTCAGAAATATGTAATTTATGCTTCCTAAATTTTCAATGAATGTACAAAGGTAATAGGTTTCTCCTTAAGAAGTAACATTAACTCTATTCTTCCAGTGCTAAAATTCCATTCTGAT	327	chr4	95516635	95516961	-	none	PDLIM5	2.06202	15.6156	4.64728e-05	2.33808	0	0	1.93165	1.72356	6.17091	0	6.67005	0	9.46957	2.26828	7.25029	7.02509	29.1566	13.4963	16.5503	14.5046	21.7413	31.9717	6.39855	21.7235	30.3273	28.3014	7.09465	2.56953
2807	TCTGTAAGTCCTCTACATACCCTGAGCGGTAAGTCATTAAGAAAAAGAGTCTAGTGAGAACCATTTAGAATCACTTTCTGTATGGGGGGCTTCAAATCCCTCCAGGATATAAATAAACCTCTGGGTTTTGGTTATTTTTATTTGCTGTCTTTCAACACAGAGCATTTATTAGTTTCACCATCACCCTTGACGACATCACTTCTGTTTTTTACTTATCCC	219	chr4	95518615	95518833	-	none	PDLIM5	3.53	16.183	0.000414012	1.88292	2.93637	0	6.76079	4.30889	7.05246	0	3.33503	3.84649	11.3635	12.0975	13.4648	10.5376	16.3277	8.0978	11.3239	13.0541	24.5771	13.2297	3.65631	15.0393	47.5127	46.1208	8.67124	3.85429
76389	AATAACAGATCTTTATAAGTGCTAATAGTACACGTTTAATTTGGTAAACAACAACAACAACAGGCATTTCCAGCATTAAACAGAATTAAACAATTTGGATGTGAAAATACATAGGAACTATGTTTCTTGGCTCAATAATTTTTAAGTACTAGTCTCACAAGGAACTGAAGTGTAGTAATTACTTATGTTCAACAGATGGCGACCTTTACATTGTAGTCAGCAAAACAGTATTTGCATAAAACAGTATACTCAACCAGCAGAAAATCAAAGATCAATTACAAATATTCCATATTTTGCAAGAGACAAAAATTACTTGATCATATACACCATTTTTTGACAGGTGGTTTTTTTACAGGTTGGCAAACA	366	chr4	95517071	95517436	-	none	PDLIM5	6.4353	30.6409	0.00222436	1.85424	0	4.83074	10.6241	5.17067	16.7496	0	8.33757	5.76973	16.0983	11.3414	16.5721	2.3417	47.8168	12.1467	35.7139	23.9325	28.3582	85.9928	6.39855	35.9273	56.6109	85.9523	17.3425	7.70859
7019	TATTACATTGCCTTTCATTGGTGCCACTGACTTCTCAAAAAGAAAAGAATGGTTTCAGAGTCAAATGTGAAGAATGTTGTTTCTTAATTATTATTATTTATTTTTCACTTGAAAATGTACAACGCCCATGAACACCTTAAGGCTTTATAGTGCTATAATGAAGAAGAAGAAAACCATTTACTTGAGCACACAAGTCTCTTTAATTAGCTAAAATTAATTAATTAAGCATCTATAAAGACAAGTTGGGAAATGCTCCTGGAGAGTCAGTCAAGAATTCTTTGAGTAGCAGGTAATACAAACTCAACCTGAGCCATTCTAAGAACAAGCTGGATATTGGCAAGAACTTACTTAGTAAACTACTAGGAGAATCTCTCTGAGTTGTCGGTTTCCAT	392	chr3	169804338	169804729	+	none	PHC3	11.6163	40.4671	2.87963e-05	1.64252	0	13.2845	17.3849	7.756	14.1049	18.1498	11.6726	10.5778	32.1965	29.4877	25.8939	35.1254	113.128	63.4328	29.6164	16.6802	45.3731	39.689	24.6801	35.0917	55.6	46.1208	28.3786	26.9801
4311	TTCTATAAAAACCAAATGCATATAGACAGCCAACTATATCGAAAGTTTAGGACAAATAATCCTATGTTCAAGACAACATCAGGGTGTGTTTAAACAGTTTAGAACTCTTCTTAAACCCGGCCCCCTCTTTCCTTCTATTACTTTTTCCTCTAAATATATTGCCTTCTAGTTGTTGGCCAAATATGGGACTGAAATATGTTTAAATATATTGAAATTAATCAGTAAAGACTTGCTTACACTCTTTGCAGATTTTAAATCAGGAGATTTTTAAAACCATTTCAAACCTCACTAAGCTTTTTGTTTTGTTTACACAGAGGATTCCCCATGTCTCATAAGCTTAAAGAAAAAAAAA	352	chr3	169805004	169805355	+	none	PHC3	11.8854	36.0853	0.00233562	1.43239	4.40455	9.66148	12.5558	3.44711	24.6836	11.3436	24.1789	4.80811	39.7722	18.1463	19.6794	31.6129	124.79	36.4401	28.7453	13.0541	25.5224	52.9186	22.852	22.559	38.4146	44.0244	22.8606	35.9734
110146	AAAGTAGTTCAACCATTGTGGAAGACAGTGTGGCGATTCCTCAAGCATCTAGAACTAGAAATACCATTTGACCCAGAAATCCCATTACTGGGTATATACCATAAGGATTATAAACGATTCTACTATAAAGACACACGCACAAGTATGTTTATTGCAGCACTATTCACAATAGCAAATAATTGGAACCAACCGAAATGCCCATCAATGATAGACTAGATAAAGAAAATGTGGTACATATACACTATGAAATACGATGCAGCCATAAAAAGAATAAGGTTATGTCCTTTGCAGAAGCGTGGATAAAGCTGGAGACTATTATCCTTAGCAGACTAACACCAGAACAGGAAACCAAATACCACCTG	362	chr9	71586161	71586514	-	none	PIP5K1B	2.4208	19.6379	6.33318e-05	2.404	0	4.83074	4.82914	1.72356	1.76312	0	3.33503	2.88486	48.2948	21.9267	9.3218	16.3919	9.33011	31.0416	65.3303	7.97751	40.6467	9.92224	2.74223	6.68414	15.1636	0	6.30636	23.1258
99231	GGAGGAGGGGCGCTGTGCCCTCTCCCCAACGGCGGTCAGCTTGGAACGCCTGCCCGGCGCACGCCCGGGGCCGGGGAGCCGAACTCGGTGCCAGCCGCACCCGGGCGGGTTGCTGGTGCGCCCTCCCCTCGCCCCCGTCCCTGGGGTCCTTGACCCAGGCTCTTGGGGCTAGCCTATCTTCTGAGGAGCACAAGGTCCCTGGGGGCTCAGGGAAGAGAAATTGGAGAAAGGGGGAGGAAGCCCCCAAGATGGATCACCC	259	chr20	56285259	56285517	+	none	PMEPA1	17.0744	47.4921	1.47109e-05	1.40792	16.15	15.6999	15.4532	11.2031	17.6312	11.3436	18.3426	30.7719	108.9	23.4389	30.0369	26.9295	46.6505	35.0905	47.9089	65.9958	47.2637	42.9964	38.3913	38.4338	58.6327	61.8437	34.685	52.6753
111529	CATGGCCCACTGAACCCCCAAGCGCTTTCACCCGAACCCAAGGAGGACGACCAGGAAAGACGGGAACTCGCGTAGACACGCCCGGAAGCCCTTGTCATGTAAATAGCTGTCGGGGACTGGTGTATTGTCGCCGCCCCAGCCGGCGGGACCTGGGGCGAATCCACACCCATTGTCTGCTGCCCAAGGGGCCTCCGGCTGGGGGGCGCGGCTGCGGAGTTCAAAAGGGGTATGAGCAGGAGGGGTGTACTTTTAGTTCATTAAGTTTTAATTACAGGAGTGCTACAAGAACACATTCTTCAGGTTTAAAAAGATATTAAAATATTACATAAGAGACCTCCCCTCCCTGGCCCACCTCCAGCCTCTTAAAAATTTAGTGTGTCGCCTTTTAGACACTTTCTC…	812	chr20	56285573	56286384	+	none	PMEPA1	21.0837	51.5101	0.000506859	1.21543	13.2136	25.3614	9.65827	17.2356	15.868	25.7122	30.849	30.7719	139.203	40.8291	30.0369	39.8088	60.6457	31.0416	51.3932	52.9416	36.8657	57.3285	44.7898	38.4338	54.5891	61.8437	29.1669	55.2449
27595	GTTAGTTAACCTGCTGCTGAGAATTTCCAGCAACACAGAGCAGAAACTGAGCTCTACATGCAACAAACTGTCATGGTTATTAGTTTTGATTTATCTAATTGCCTATCTTCACATAATAGCCTTAATAGCTGTGTGTCCTTGAGAAAATTTTTAAGAAACCAGTTTCATCACCTGTAGAATGGAGACAGTAAGTAATACCTATTAAAG	207	chr4	102132943	102133149	+	none	PPP3CA	1.68334	27.4869	1.00077e-05	2.89208	4.40455	0	3.86331	0	1.76312	1.51248	0	1.92324	130.68	15.878	12.4291	21.0753	6.99758	125.516	10.4528	4.35137	42.5373	4.40989	1.82816	10.0262	6.06546	7.33739	5.51806	34.6886
19648	GCAGATGCCGCCGTGGCTCCATCCATCAGCACCCAGTCCTTTGCTTCACTGTGCTCTGGCCAAGCGCGTGCGACTTCCTGTCACACCTTAGGCCTGAGCGCTTATTAAGAAAACAGTATGAAAAATGACAAACACTCCTGTCCACAGTCTGAGAATCCCAAGTGTCTCAACACGGTACCAGAAGTACCACCTGGGAGCAGCACTGGCTATCTTGGGTCAGGGACACACAAGCTTGAACGTGGCCTCTTAGAGGAGCTCGATGTCAGATATGTAAACACTGGCACAAGAAAATCCAGACACTAAGCATTCACCGTGTCAATTCTGAGACAGGAAACACCGCCCAGAGTGAGGAGCCTGCGCAGCCCGGGGCCCAGGAGGAGAGGCCTTCACTCGCATGTC…	536	chr1	2335422	2335957	-	none	RER1	10.229	49.0418	0.00014386	1.95548	4.40455	10.8692	12.5558	7.756	14.9865	12.8561	11.6726	6.73135	83.3322	46.8779	15.5363	36.2963	27.9903	37.7897	83.6228	17.4055	108.706	19.8445	15.5393	5.84862	28.3055	48.2172	20.4957	188.86
107516	CCCAAGTCTTTTAATAAAACTATCCTTCCAGGAATAAGCACCACATTGACATAGTGACTTGCCGCAGCTTCAGCGACCTTATTAGAGCAGCTTAGCCTTAGTCCATCTGATCCCAAATCCCGCTCTGCCAGGGTTTCAGGAGGCTGGAGCGAGGACTGTCCCATCCCCTGCTGAGGTGGCTGATCAGCCAGACCGGCAGGACATCTGCTCCCAGCCTGTCTCTCAATGGAGGAAGGTGGGCCTTGATGTTGATGTCAGCCCCAAAGGCTATGGAGGGCCTGCAAACCCCACCACAGACACACACCAGCCCTCCCACAACTGACGGTGTGAGCTGTCATCAACCTCAAGTCACTCTCATGACAGCCAAGGCCACCTCACGTCACTCCTGACCCAGAATTT…	403	chr19	33529941	33530343	+	none	RHPN2	1.90133	17.2333	0.000571169	2.34493	5.87273	0	0	0	2.64467	2.26872	2.50127	1.92324	56.8174	40.073	5.17878	0	15.1614	12.1467	47.0378	9.42796	16.0696	0	0	5.0131	18.1964	16.7712	19.7074	14.1324
4544	CAGAGCTTTGGCTTGGCCAACATTATCTTTAACACAGCCCCTCCACAACCCGGTCACTCATGGATTCACCAGAAATTGGGTAATGATATTTCTTAAATGTAGAGCTCATATGTACTTCAGTGTTTCATATTAGAAGTGCTTTGGTCTTTATTTAGAAGTTTGGCGATGTTTTTGTGACCAGGAATGTGCTGTGGGAACTTTCCTCTTATTTATATCAATTAACCTATGGTGAAACTGGTTTCCTTGTACACTGCATGGCTTAAAGCTCCAGTTTCTAAGAACCTATGGATGATGTTAAGTGAAGACTTACTGTGTTGAGGGCCTAACTCTAAAAATAGAAAGAAATTAATCCAAAATGTATTTCTAAGGACTAACACTTGTATTAAATTACTCCAACCG…	594	chr7	156434549	156435142	-	none	RNF32	0	11.0324	1.85152e-08	3.84411	0	0	0	0	0	0	0	0	16.0983	9.82923	4.14302	29.2712	20.9927	6.74817	7.83963	15.2298	4.72637	11.0247	27.4223	4.17759	2.02182	0	1.57659	15.4172
16965	ATGGCACATTACAGGTAGGAGGAAAGAACTGGCAGGCTGGAAATCAGCATGATATGCTTATTTTGGGGAGAAAGGGAACAATGAAGAAACTGGAACGCAAGAGGAACACTGGCTAACTTCAGTCTGTCCAGAACACAGAAGTACAGAATATGGGGACAGACCAACTTGAGTTCCAATTGAACTCTACCGCTTTGCTGCGCAAGATACTGGACACAGCTGAGCCCCAGGCTCCTCATCTATAAAGCAGGTATAATAACGCTGGCTTTGCAGGGTTGCCGCAAGGATTAATGAGACAACCTTTGAAGTATCTAAAGTAGGTCTTTTCACACAGAACTTACTCTTGTTATTCTTGCTTCAATTCCCTTCAAAGCTGGTGGAATAATTTGGAATTGGCCCTTT…	414	chr7	156435706	156436119	-	none	RNF32	1.83736	24.6775	6.51952e-07	2.92914	0	4.83074	0	0	1.76312	2.26872	5.8363	0	15.1513	21.1707	8.28605	78.4468	26.8241	13.4963	17.4214	24.6578	13.2338	47.4063	64.8996	16.7103	4.04364	2.0964	6.30636	34.6886
69189	CCCCGTATCTCATCAAGACAACTGAACTTGGAGAAATGGTGGAATTTAAAATACTGAAAGATCACTGCCAGAATTTTCTCAGTTCCTGCTTCCAAAATGCCTATAACCTGCAGAAGATACAGTTTGCATCACACTAAAAATGGTCCGGTCATAGCTGCAGTCTGCAATTTAATCTCAAGTTTCTACACAGTAGACCACTGTCATTAATATCAAG	214	chr7	156434336	156434549	-	none	RNF32	0.853166	16.308	8.20586e-07	3.10096	0	2.41537	2.89748	0	0	1.51248	0	0	16.0983	10.5853	13.4648	51.5173	25.6578	10.7971	15.6793	25.383	3.78109	22.0494	42.0476	6.68414	4.04364	0	1.57659	11.5629
109292	GGACATGGTGTATTTTATGAAGACAGATGTATTCAAAATATACTGTGATGAGGAGAAATAGAAAGTTATTCAAGTAATCTAGGAACTGGCACAGAAGGCCCTTGAACATATTTCTTCTAATGTTGTTTCCCTATAACGCTGATGAGAAAAAAAATTGATCCCCAGCAGGGGCCACTGTCTGTTTGGAGTTTGCACGTCCTCCCCATGTGCTGTGGGTTTCCTCCAGGTACC	231	chr7	156435482	156435712	-	none	RNF32	0.916501	11.4288	0.000135329	2.58711	0	4.83074	0	0	0	0	2.50127	0	9.46957	12.8536	4.14302	46.8339	12.8289	2.69927	9.58177	11.6036	3.78109	7.7173	35.6491	6.68414	2.02182	0	1.57659	15.4172
105109	AGATCTATTAGAAAATATGTCTTTAAAGTGCAGAAGAGTATTTACTTTAAAAAAGCACTACAAATATAAATAGGGTTGTAATACCTTTACTTGTATCAGAAATCTTATTGTACACATTTTGTGCTAGAGGAAAACCCTGAGGCAGTTGTTAAAATTTTGTCCAACATCAGTGAGTTTATATTGAAGAAAAACCTGCAAATATAATAAATTTGGAAAAACATTTTTTCAAAA	231	chr19	24016545	24016775	+	none	RP11-255H23.4	7.84469	21.5652	0.000436662	1.3686	7.34091	12.0768	13.5216	2.58533	7.05246	8.31864	4.16878	7.69297	31.2496	7.56095	25.8939	37.4671	17.494	18.8949	13.0661	7.97751	20.796	30.8692	25.5942	24.23	27.2946	16.7712	14.1893	25.6953
8042	GGCCCCTCCCTGTTGTTGATTTGATGATTCTCCATAAATGTGGATGGCTAAACCCTGTTTTTTTGACTGCCTTCACTCTCACACTGAACCTGCCTTCCGCCTCATTAACAAGCTCTGGATTTCCCTCTTTGTCCACAAACAATTTGGTTCCATCCGGGAGGATGGAGAACCCCTAGGTAAATAAACTGTTTAGGGGCTGCTGCAGATGAACCAAGCTCATCTTGTTATGAAAATGAACACTGAACAGAAATAAATGAACTTGACAATAGCACATGAGCATCCTTGCATTGTAAAGTCTTCATTCATGTCAAAAGCAGCAGTTGGTTATTTGTTTCAAAGTGTCTTCATGCATCAAGTAGCTTCTGGTAATAGAGATTAACTTTG	384	chrX	16174066	16174449	+	none	RP11-431J24.2	0.614174	13.2625	4.30185e-06	3.00984	0	0	0	0	2.64467	2.26872	0	0	16.0983	4.53657	18.6436	11.7085	2.33253	18.8949	15.6793	3.62614	12.2886	2.20494	5.48447	3.34207	79.8618	7.33739	6.30636	3.85429
24740	AAAAAAAAATCATGCTATTAATTAATCAAATATCTATAAATGCATAAAGTACAGTATTTATTCTTGATACATAGGTTTTGAGTCAAATGTATTTACTTAGATTTGTCTTTGACTGCTACACTGAATCAGTAGTTTCACTATAAGAAAGAAGGGATTGTATCTGAGTAGAAATGGGAACATGTTTATATTTAATGTATGCTTCT	203	chrX	16171596	16171798	+	none	RP11-431J24.2	2.53019	20.1402	0.00237343	2.16014	4.40455	0	0	0	10.5787	0	3.33503	1.92324	31.2496	9.82923	24.8581	19.9044	0	29.6919	20.9057	4.35137	20.796	6.61483	10.9689	2.50655	115.244	17.8194	2.36488	5.13906
13091	TACAGGATATTCTCTTGTCCCCAAAGTGAATCTGTTTAACTTGGCACAAGGGAGTGGACAGGGTCATTGTGGGCTGCCCCAGGAGAGACATATTGGTGGGCACAACATTCAATGCCACAATGAAATGGAAGGCTAAGACAAAGAAGGGTGGGATCCTTGGGAGCAAAGACACTGGCCAAGAAATACACCAAATTTGACCAAAACCTGAATGGAGTGCTGTGGCTCTGGAAGTGCTGGAAAGGAAGGGGCTCAACTTCACCAAACACTGACAATGTGCCAAGTCCAGTGCTGGGCACATGAAGC	303	chrX	16175552	16175854	+	none	RP11-431J24.2	5.23443	28.6657	0.00447215	1.90948	2.93637	2.41537	2.89748	2.58533	12.3418	1.51248	13.3401	3.84649	60.6052	7.56095	45.5733	7.02509	3.49879	52.6357	35.7139	5.80182	28.3582	12.1272	9.14078	1.67103	147.593	30.3978	7.09465	3.85429
66123	GGAGAACAGGCAACATGTGGCAGAAGGGAAGACAGAGGTGCAGAGGCTGATGACGTCAGAATCACAGGAACAGGATTTCTTTGGCCACTTTGGCTGAAATTCACCACTTCCATCCAATTCCAGTGAGAGACATGGACTCACAGATGGAGCATTTCTTGCAACAAGAGATACTACTTTTTCAAAAAGTCACCCAGGAATTGATAGTGTTGAATGACTCGATACTCGATCGTGGATGGTTTCCAGTTCAAGGATACTTTCTACAGCAGAATAATAACACTAGCAAA	284	chr1	143403478	143403761	+	none	RP11-435B5.4	4.36239	38.9486	0.000231697	2.38828	0	10.8692	8.69244	4.30889	2.64467	4.53744	0	3.84649	11.3635	10.5853	100.468	229.486	6.99758	43.1883	13.9371	1.45046	29.3035	63.9433	40.2194	13.3683	6.06546	27.2532	16.5542	8.99335
16554	CTTTGAGAATTTTGTTATGTGGCCAGAAAGTCATTGGAAGAACAAAGCGAACGTTGTCTGGCTGGACAACAACTCAAGACAAGCACTGGGCAGGATGGAGGAGGGAAGCCAAGGAGGCCCCCTCATCAAAGGAGTCCAGCAAAGCCCGAAGGGCACCACACACCCTCAGTTTCTTTTCTCCATTTCCATCAAGCCCAGCACACCGAGACAGTCCCACAGTCTCCACACTCTCAACGTGAGCGCATTCACGATGTTTTGAG	260	chr4	95601186	95601445	-	none	RP11-554D13.1	2.53111	23.0859	0.000293732	2.39892	5.87273	3.62305	6.76079	1.72356	0	2.26872	0	0	158.142	19.6585	15.5363	18.7336	8.16385	41.8386	16.5503	1.45046	2.83582	8.81977	5.48447	8.35517	21.2291	18.8676	3.15318	20.5562
90392	TCTTAAACAAATTGGTATAATCATCATATAGTAGCTGTGGTAGGCACACACCTTTTTCTAACTCCAGTGCCCAGTAGGGAATAGTTTTTGTTTGGTACAAGGACCAGATAAAGGATAGCCAAGCCCTGCCAGATTGAGACCCTGGGCCAGGTACCAACCTCTCACTAAACCTCAGTTTCCTCATCAGTCTTTACATCCCACAGGGCTTTTCC	212	chr4	95606992	95607203	-	none	RP11-554D13.1	8.57833	50.5995	0.00376453	1.97533	13.2136	26.5691	5.79496	1.72356	5.28935	14.3686	1.66751	0	214.959	49.1462	43.5018	97.1804	10.4964	194.347	17.4214	2.90091	43.4826	12.1272	19.1956	10.0262	18.1964	33.5424	7.09465	35.9734
67107	GGGCACTGGTGTCCCAGTCAATGGCAGGCAGGAGGTAGCCCAGGCAGCCCCCAAGACTGATCATGAAGGCATAGACAGAGTAGGCCTGGCGACAGTGGTCCGGGTCCCGGAAGAGGTCAGAGAGCAGGGCCTCCAGTGGAGTGAAGCACACCTGGCCACAGAAGTCCAGCAGCCCCACGCCCAGGATGAGCAGTGCCAGCTCCAGGGGCCTGGGATCCGGGCACAGCAGCCCTGCTAGCCAGCCGGCCCTTGGGATGAG	259	chr1	205632357	205632615	+	none	SLC45A3	0	15.5546	1.03241e-08	3.95614	0	0	0	0	0	0	0	0	73.8626	4.53657	10.3576	12.8793	37.3204	4.0489	7.83963	1.45046	25.5224	24.2544	10.9689	5.0131	5.05455	16.7712	0	8.99335
50509	CCCCTTGCTGAAGGCAGAGGAAGGTAGTCTGAAGGTTTCCTGGGAGTCTCAGCTGTGAGGACAGGCGGGTGAGAGGGAACACAAAGACAGCTGGCCATAGGCTTCAAGACGCTTCTAGGACGCCTGAGCTGGAAGGCGCTGGTGAGATTATTTGGAAAGTCGTTGGGGGAGCAGAGGGCACACTGCGGCTGGAACCAGGCAGATCTGAAATCCAGCCTTAACTCCTCCACTCCCTCTAGACTTTGAATAAGCTCCGCCTTTCCTTCTGTCAAACTGGGGCAACGACTCTGATCAGACTCCTAGAGCAGCCAGAGGCCTTCCTGAAACCGCAAGCAGAGATGTTCCACACCCATGAGAAGCCGTGTATGCAGATGGGGTCCATCCCCACTTTCCTGACAG…	738	chr1	205631457	205632194	+	none	SLC45A3	0	29.2645	1.29083e-08	3.96609	0	0	0	0	0	0	0	0	141.097	7.56095	17.6079	32.7837	113.128	8.0978	14.8082	1.45046	49.1542	28.6643	11.883	2.50655	10.1091	17.8194	0	11.5629
56251	AGAAGGTGAACCCGGTGAGGGCGGCTGAAGCTGTCACCACGGCCACACTGTGGGACAGGCATGTGGCACCGGCAGCCACAGGGAAAGCTGCCACACTGGCCAAATAGACTGCTCGAGTGCCGAATCGCTGCACCAGCCGGTCCATGACCAGAGAGAAGACCAGGGAGATGGCGCACTGCAGGAACAGCCCCAGGCTGCCCATCCGAACGCCTGCAGAGGGAGAGGGGCCATCAGACAGAGCCTGGGAGGGAAGGGTCGGAGCAGTCTCAGGGAGATGAGAAGGCGGAACCACAGGTACCTGCTGCACGAGACCTGCTGTGGACCAGCCCTGCTCCCCAGCACCCTTCCCCTTTCTACCTCTAGCAATG	368	chr1	205631045	205631412	+	none	SLC45A3	0.449896	23.5385	1.45678e-07	3.53929	0	0	1.93165	0	0	0	1.66751	0	100.377	3.78047	17.6079	24.5878	96.7999	4.0489	19.1635	2.90091	32.1393	19.8445	5.48447	5.84862	7.07637	24.1086	0	12.8476
4234	TGAAAGCCTACAACAACAAGTATTTATTGAGCACCAAGTTCATTACTGGAGTGAGCTACTATTACTAATGGGTAGGCCACCTCATTCAGGGCTAGAAAAATATTGCTACAGAGTCTCCAAGTAATGTTTGGGGAAAACAAATTCCTAAATATATCCCTGAAGATGTTTGTATAAGGACTCTAAAATAGACCACATAGAAATATTTGCATGTTTCTATTTACATAATGG	228	chr7	89855898	89856125	-	none	STEAP2	0	13.5045	1.5887e-09	4.07635	0	0	0	0	0	0	0	0	13.2574	5.29266	23.8224	17.5627	3.49879	49.9364	4.35535	5.0766	28.3582	4.40989	21.9379	8.35517	18.1964	6.28919	3.15318	2.56953
103196	AGGTATACTAGGGAGAGCAAAGTAATGGCAACTATAGGTAAGGTTTTATTCACAATCTCTATAGGAATTTTGTAAAAGTCACTCTGTTGGTTTCTAGCATATGGATGAATCACATCTCTGACAAAGGAATAAAGGAAAAAAAATGTGGCCAAGCTTATAGCTACCACCACTGGCCCTCTCCAGAGAGTAAAGAGTCGTAGGGGTAAATTTTCAATCTCTCTGGCTGATGATAAGGATCCCAAGTCAATGGGAATGAAATTCAACTGGCGGGCAAGTTCAATAACCTGTTGTCGCGCTTGAATATTGTTGCTGCATATATAAACCTGTGGAAAAAACAAAAAGACTCAGCATTACCATTGTTGTTTATAAAAATGGTAGCAATCGCATGCTCCACTTACG…	402	chr7	89856206	89856607	-	none	STEAP2	1.33793	20.1363	2.83294e-08	3.24038	5.87273	4.83074	0	0	0	0	0	0	35.9844	13.6097	36.2515	22.2461	4.66505	52.6357	9.58177	7.97751	38.7562	5.51236	16.4534	13.3683	29.3164	11.5302	6.30636	17.9867
94511	TTTGCTGAAAACACATGTGGGCCCTTAAGGGGTAGGTGATTTATCAATGTTATTGTTATGTTAATGTCTCAGTTACCTCAATGTCCTGGTTTCTGGCCCAGCAGGGATAAATACATCTCCTGATGTCCTATGTCCTTTATCACGCCTGCAGTCTTACTCTTTCACATTTTTGGTGTATCTTCTTTCTCACTTTTCTAACTCATTTACAATCCTTTCTTTAAAAATTTGTCTTCACCTGTCCTGTTTTTTCAGTATTAAAATACAACTATGTTCATTCACCACATTTTCCATAGCACCAGTACAATAAAAAGTGACTTGGATAAAGCTTTTCATTTCCTTACTGCACAATTTGCTCAAGTTGTCATTCTCAATATTGTCTCATTTCCCCATACCCTGACA	399	chr7	89842486	89842884	-	none	STEAP2	3.05623	25.2599	5.55815e-06	2.52557	4.40455	3.62305	2.89748	0	4.40779	3.02496	4.16878	1.92324	61.5522	5.29266	27.9654	58.5424	4.66505	62.0831	11.3239	10.8784	26.4676	7.7173	2.74223	16.7103	31.3382	20.964	7.09465	48.8211
64973	GTGTTTGCCATGCAGGTAGAATACATGCAGGTCAAATCTCATATTGTGCTAAATCACAGCATTCTGAAAAACTTGGGACCTTGCAAAAGGCCATATCTCAGAAAAGTTACTGCTTCAAATAAATGTGCCATTTTACAAAATTATACCTACTGTATCAGAAAAAAAAAATGTTCTCTCATGTGAGTGACATTTATATGACTGCCATTTGTAGGGAATAGGACATTCTCACATAGCAAGGCTGAAGAATGGTTTTGAAAGCTGAGAGTATTCTCTGAATGATAAATGTGGCAGAACTTTAAGATGCTCCTGTGGGAAGAGACTCTTCCCCCGACAACTGGAGAGTTTCCTTATAAAAATGGAACATGCATTATTATGAAAAAAGTAACCACTGAATTATAG…	487	chr7	87934629	87935115	+	none	STEAP4	0	29.5211	2.68679e-10	4.31361	0	0	0	0	0	0	0	0	148.672	21.1707	14.5006	10.5376	8.16385	74.2298	21.7768	4.35137	33.0846	13.2297	0	3.34207	10.1091	53.4582	9.45954	46.2515
16995	GGTGGGCAAGGATGCACGTATGCGTTCACTACATGGACATTCGATGAATGAAGGTGTCCCGAATTAACATTATACTAGACAATGAAGGGTGTAAACTGCAGCCCAGGAGCACCACTGCCCTACCCCCTCAGTTACGAACTTTCACTGGATTCTTTAAATGTGGGCTGAAGATAATGGCACATAGTTTGAAGGATGTAGTGAGGATGGCTTTGTAGCCTTAGGACTGGGCAGTGATCAACGCAGTAAATGAAAGCTGCGATTGCCAGGTGAGGGCCCCGGTGCTCTGTACTCATTTTATTGTGCCCCTATCTGAACAGGATTCCGTAGAAATGA	333	chr17	62224448	62224780	+	none	TEX2	4.0341	20.8833	0.000158555	2.03338	2.93637	7.24611	0	2.58533	2.64467	3.7812	2.50127	10.5778	99.4305	15.1219	11.3933	16.3919	13.9952	22.9438	15.6793	10.1532	16.0696	12.1272	13.7112	7.51966	11.12	39.8316	5.51806	23.1258
109999	AGATGATGAAACTGAGGCACAAACTGCTTAATGAACTTGTCCATGGTAAAGAAGAAAGGACCCTGGATAAGAGAGGAAAAGGACCTGGATTCTAGTCCTGCCACTATTGCCGACTGACCTGAGCAACTCTCTTCCCCTAATCTGTTGTGATTTTCCCTTTGTAAAATGGGAAGCCTGGACCAGACAATCACTGAGTCTTCCTTTAGCTCCCTGATGATTTTTACTGCTTAAGCCAACTTCTATCTGAAACCAGTATTCCCCAGGAGTTTAAGATGGCAGGCTAAGTTACATGAGCAGGAACATATTTATTTTGGGAAAACCTATTGGGAGAAAATGCAAGGCTGCATGATGGTCAGGAGGCTGGTGGGACAACTGACTGCTGGACCACAATCAGAAGTG…	404	chr1	156258509	156258912	-	none	TMEM79	5.92564	33.4987	4.58347e-07	2.25889	10.2773	8.45379	3.86331	3.44711	0	6.80616	11.6726	2.88486	86.1731	13.6097	33.1442	33.9546	32.6554	66.132	55.7485	22.4821	32.1393	12.1272	31.9927	21.7235	27.2946	11.5302	24.4371	30.8344
18775	AAGATCAGAGCAGAACTAAATGAAATTGAAACAACAACAAAAAAAATACAAAAGATAAATGAAACAAAAACCTGGTTCTTTGAAAAGATAAATAAAATTGATAGACCATTAGCAAGGTTAACCAAGAAAAGAAGAGAAAATCCAAATAAGCTCAATTAGAAGCAAAATGGGAGATATTACAACTGACACCACTGAAATACAAAAGATCATTCATGGCTACTATGAACAGCTTTATGCACATCAACTGGGAAACCTAGAGATGGATAAATTCCTGGAAAGATATAACCCTCCTAGCTTAAGTCAGGAAGAATTAGACACCCTGAACAATAACAAGCAGTAAGATTGAAATGGTAATATAAAAATTACCAACAAAAAAAGTCAAGAACCAGACAGATTCAC…	600	chr2	1470074	1470673	-	none	TPO	0.554116	12.7141	1.94011e-08	3.34832	0	0	1.93165	0	0	0	2.50127	0	19.8861	18.9024	14.5006	7.02509	11.6626	13.4963	35.7139	6.52705	18.9055	7.7173	8.2267	10.8617	12.1309	0	6.30636	11.5629
61528	AGGAGGTCACTGTCGACTTCGAGCAAAGGAGATTCCTGAACCAAAACTGAGCCTAGAAGCCATCAACACATAAGTAGACCTGGCCTTATAAAATATGAAAGTGCTTCATGCTGACAGTTCTGTATTGATGGGGCTGTAGAAAAACATTTGTAAGAAAAGTGAGAGATAGAGAGTTAACATCTAGAGTGGAAAGGAGCAATTAAAATCAATTAACAGTCAAATAGTAGAAAAATGGACAAAGGCTATGAACAGATCATTCGTTGAACAAATACAAATTGCCAAAAAAAGATAAATAAAGGACAACTTTAAAATTCACTAATATTCAGGGAAAGCAACTAATGTAACA	346	chr2	1476645	1476990	-	none	TPO	0	11.7374	2.90968e-08	3.82478	0	0	0	0	0	0	0	0	7.57566	22.6828	13.4648	2.3417	10.4964	14.846	38.3271	9.42796	12.2886	6.61483	3.65631	13.3683	26.2836	0	0	6.42382
33691	CCAGAGGAAAAGAAGTCATTATACGAAAAATGCATTGGCACATCCGTGTTTATAGCCGCACAATTCACAATTGCCAAACTGTGGAAGCAACCCAAATGCCCATCAATCAATGAGTGGATAAAGAAACTGTGATTTTTTATATACGATGGAATACTACTCAGCCATAAAAAGGAGTGAATTAATGGCATTTGCAGAGACCTGGTTGAGATTGGAG	214	chr2	1467962	1468175	-	none	TPO	0.570624	14.1403	1.24031e-07	3.30363	0	0	2.89748	0	0	0	1.66751	0	18.9391	24.9511	12.4291	4.68339	10.4964	18.8949	43.5535	7.25228	22.6866	9.92224	6.39855	17.5459	19.2073	0	1.57659	7.70859
2286	GATTAAATCAAAGCATGTTGTATGGCAGAGAGCTCTGTCGATGGAAAATTACAGTTGCAATCACAGGGCCTGGAAATTACGATTTGATACATGGTCCCAGGAGAATTATGTACCAAGATTCTACTTTCAGGTTTAACAGTGTTTCTTTCAGACAGAAAAATCAGTGTCAAGTTGTTTTGGTATTTAAGGGGAATATTTTGGTCAATAAACTGCATCCAAATGAAGCATAATAGGAATAATTCTAGAATATGAATCTTCTCTTTTAGCTTACCAGTTTAGGAAGGCAAG	288	chr2	1487688	1487975	-	none	TPO	1.10754	15.0708	4.95456e-07	2.96384	2.93637	0	1.93165	1.72356	0	2.26872	0	0	26.5148	20.4146	11.3933	7.02509	18.6602	25.643	39.1982	8.70274	27.4129	8.81977	7.31263	15.0393	13.1418	0	1.57659	10.2781
57120	GACCTGGTGGGAAGAAAACATGAAGCCCTGCTTCACAACCCAGTGTGGAAAACAAAGAAAGAGCACCGAGTGAGGCAGGATTTGCCATGAGAAAGGAGCAGGGCTCAGGCATGCAGGAGAGATGAGAAGAACCAGGAGCGACTGTATATGCGGTTTCATGGCAGCACATTGGAAAATGAAGAACAGATCGATGACTCCCTAACAAAATAGAAATAACCACAGCTTTTCCAAGAAGAAATGTAAAACTCCAATGGACAATGAGGATGGAAGAGATAGACAAGGTGATCAGAAATCCAG	297	chr2	1478345	1478641	-	none	TPO	0.241457	9.69134	2.42382e-06	3.23352	0	0	1.93165	0	0	0	0	0	13.2574	7.56095	6.21454	3.51254	3.49879	9.44743	38.3271	8.70274	11.3433	7.7173	5.48447	13.3683	24.2618	0	2.36488	0
45657	GCTTGTGCATGACTTCTTTAGGTGTAGCCAAGTGAGCATTCATATCATGGAAAGGGCACACCGTGACCACTCATATCGTGGGAAGAGCACACTATGAGCACTCAGATCATCAGAAGGACACACCATGAGCATTTGGATCAAGGGAAGGACATAGCATGAGTATTTGGATCACAGAAAGGACACACCATGAGCACTCAGATCATGTGAAGGGCACTCTATAAGCATTCAGAACACAGGAGGGGCACGCCATGAGCATTCACGTCAT	265	chr2	1475955	1476219	-	none	TPO	0.690301	11.0568	2.69826e-06	2.92794	0	0	1.93165	0	0	0	1.66751	1.92324	17.0452	18.1463	16.5721	5.85424	9.33011	5.39853	35.7139	9.42796	20.796	11.0247	3.65631	5.0131	7.07637	0	1.57659	10.2781
37158	TAACAATGTAGATGTCATAGAGAAGAAAAAAAATTGACGAAAATCGACCTAAATTTATGAATAATGGCACCGTAAACAAAATGAAAAGCCAAGCAATCATATAGAGTGAAGGACCAAGGCTCACTCCTTGTCCACCTTTTTCGCCTTTGAAACCTGTTTGCAGCAAAGATCTAACAAAGCTCACGTCCAAAGTTATTTGGATCTAAGTATTCC	213	chr2	1474051	1474263	-	none	TPO	0.674844	11.9207	3.33176e-06	2.9627	0	0	2.89748	0	0	0	2.50127	0	18.9391	24.9511	11.3933	3.51254	6.99758	14.846	36.585	17.4055	14.1791	6.61483	2.74223	11.6972	14.1527	0	1.57659	5.13906
4965	CAGGAAAATACATAGTCTTAACTACACTTGTCAAAAAGCACGACACAGTGAACGTAACTCAACTCGCTTTCAGCATAAGAGGGTGAGAAATGTGAAGTAGATGAAAAAGTGTAATAGGAAGGTAATAGAAAATAAAGAACAGGAAAGACTTATGGGCTCGAATAGACTAACTGCACCCAGAACTGAGCCCATAACCAAAGATCTGCCACCCCAGAGGTTATCAGGACCAGAGTCACAAATAAGCTCTACCAGTTATTCAAAACAAAAAGCCCAAATTTGATTTTAGACAAGGTAATCCTGAGCATAGTAAAAGAATGGGCAACCCCTGACCACTGTCAGATGCTGGTGTGTTTGTAACACCCAAATAGGTGCAGCATCGGAAAAGAGCACTGTAGCACA…	476	chr2	1474734	1475209	-	none	TPO	0.528103	9.88224	7.19206e-06	2.9123	0	0	0	1.72356	0	0	2.50127	0	11.3635	16.6341	19.6794	4.68339	8.16385	12.1467	24.39	7.97751	9.45273	13.2297	1.82816	9.19069	9.09818	0	0	10.2781
2339	ATAACATTGGAAAAATTCTTCTTGCTATTGGCTCAGGCAAGGATTTAATGACCAAGAACACAAAAGCAAATTCAATAAAAAGAAAGATAAATAGTTGGGACTTAATTAAACTAAAGAGCTTTTGCACAGCAAAAGGAACAGTCAGTAGAGTAAACAGACAACTCACAGAGTGGGAGAAAATCTTCACAATCCACACATCTGAC	203	chr2	1468578	1468780	-	none	TPO	1.12187	11.6545	0.000110732	2.49378	0	0	5.79496	0	0	1.51248	1.66751	0	17.9922	24.195	15.5363	2.3417	3.49879	22.9438	39.1982	6.52705	12.2886	4.40989	4.57039	5.84862	11.12	0	3.15318	12.8476
87142	TAGCTATGTCCTGTTTCTCTACATTGTGAATGGTGAGAGTGGATGTAGACGTTTCAGGTATCCTATCCACCTCAAATTTGCCTGACGGAATGCCGGATTCCTTTCTGACAGTGCCGTCATATGAAATGGACACCAGGAACTGTATGACTTCACCAGGTCTCTCTCGATACCAATATACAGATGTTGCAGAAATTGTTATTCCAG	204	chr7	38356644	38356847	+	none	TRGV9	0.528103	17.6515	6.32736e-09	3.5743	0	0	0	1.72356	0	0	2.50127	0	35.0374	6.04876	19.6794	5.85424	5.83132	35.0905	6.96856	12.3289	6.61691	23.1519	20.1097	22.559	63.6873	5.241	3.94147	10.2781
4464	AGTTCCCTTCAGTTCAAATCCTGTGCCCTTATTTGCTGCTTGCTGACGTAAGCAATAAGTAACCCTCTAACTAATGGTATCTACATATTTCTGTAACTTGTATTTAATGATGGTGTACCTGGTGATTGTAAAAATATTAGACAGATATAAAAGTATCTATATAATATCTATAAACTGTTAATGCTGAGGTATAGTCTGTGAATTATGTGTTTTGTATTTTTATTCATTGTGTAATTTAGTGGTGGTGAAAGTTCTACACTCAATCCTTAAAGAGTGGCAGTATCCCTTTTTCAATTTAACATGGTCTGCATCAATCTGTTTGCCTGCTAAACAAGTTAGAATAGGAAATAGTAAAATAAATCCAAACAAGAGTGTAATATTGGTTAGGGAAACAAACTT…	831	chr17	57060837	57061667	+	none	TRIM37	12.2116	44.6253	0.000190367	1.69242	10.2773	13.2845	10.6241	10.3413	15.868	1.51248	30.0152	5.76973	35.0374	24.195	29.0012	39.8088	53.6481	18.8949	36.585	53.6669	44.4278	42.9964	108.775	22.559	78.8509	37.7352	78.8295	8.99335
17887	TAACAGAGGACTAAAATCTCTGAATTTTAAAGACACAGATGACTGGCATATTTTGGATACCAGTATAGCTATATCAAATAGACAAAAACAGCTTCACTTTAGCAATGATCAGATTGTTAATCTACAGATTTTATTTTTTAAAATTTGGATGTAAGTAGAGACTTTCAGTATTTGTTTTCTCTTGATTTTGAAGTCATTTCTTCTTCTCACGTCTGTGACAAATGGTTGAAAAGGAGTCAACATGGCCCCAACTATAGTGCCGGAACCTTTTCATCATTCTGAGGCTTTGCCCCACACATGGTCCTCACTCATATCTGTCACCTTCTGAAGCCTAGATCTTGTTAACCCATCAGGTGCAGTGTCAGTTTCAAATCAAATTATCTAAGAAAACAAGAAAAC…	583	chr17	57059902	57060484	+	none	TRIM37	13.5092	46.1981	0.000504526	1.60942	19.0864	10.8692	10.6241	11.2031	13.2234	1.51248	30.0152	11.5395	29.3557	17.3902	34.1799	28.1003	78.1397	20.2445	40.0692	54.3921	34.9751	54.0211	105.119	11.6972	63.6873	51.3618	94.5954	21.841
113294	AAAGGACAAATGCCCACTCTTCTATTCTGATCTGCAAATAGCTTAAATGTCTCTTGCAAAACAAAGTAAGATACCACCAGTATTACAACACAATGATTTTCCAGACAAATGGTATGGTGTTGAAAAATAACTGTTACTTCTTAAAGCAGCATTTTATCTTCTATTTTGAAGACTATTTATTGTAATAATTAGAAAACATGAAATAGGGAACTCCAGACTGACACAGCAGTTGTTTTTGAAAAGGAAATAAACTTTGATGAATTAGATAATCCAGATACATCATTGTAAACTCTTACTCTAGGTGCTCTTTGGTGAGAGACAGGCTTTGTTCTCTTGTTCATAACATTTCTCTGCAAAGAATTCTCTATGGAGTGAAGCGAATGAAGTGAATAATTTCTT…	503	chr17	57061979	57062481	+	none	TRIM37	6.42762	24.5618	0.00122057	1.69461	4.40455	8.45379	4.82914	2.58533	11.4603	0	15.8414	3.84649	22.727	6.80485	14.5006	25.7587	22.159	16.1956	14.8082	23.9325	28.3582	35.2791	51.1884	9.19069	45.4909	16.7712	55.9689	3.85429
46562	TTTACAGATAAAACTGCTGTGGTTCAAGTGCTTCCTTCCCCATCAAATCCTTGATAAGGCTTTGTGGGAAAATGATCTAAATTATTGTTTTAATTTTTAAACCTAATTTATTCACTCAGTGAACATTCTTACCTAAGCAAGGCTATAAAAGGGAATACTACAGTTTTGTCCACACTTTAATTTGAGACCATTTTTCTTTGAATCGTAAGTTAGCAAAAGAAATTTTTTTCACCTTTGAAAATCACGTGATGT	252	chr17	57061726	57061977	+	none	TRIM37	9.23285	30.8205	0.00134237	1.56339	11.7455	7.24611	5.79496	6.89423	20.2758	1.51248	17.5089	2.88486	27.4618	11.3414	10.3576	16.3919	50.1493	13.4963	27.8743	29.7343	24.5771	46.3038	63.0714	21.7235	43.4691	33.5424	64.6402	8.99335
88220	CTTTAGGGGTCTGGATTTTGTAGGTCCGACTACACAGCAGTGTTAACTCATTTCTCATGCCATTAGCTCTCTACAAAATAAAGCAAAGTAGTTCTAGTGTGGTCGTTATAAACCAATATTGTGAAAAATAGCAACTATTCATTTGTTCACAACATGCGTATTTATAGAGTAGTTAGGTACCATTTGTAAGGTAAATCCTTTAAAATTCTATAATACATACTAAAATAGTGGTTATTGGTCTGATATATGCTGCTCTTGGTTCTATAAACTAGATAAAAGCAGTGCTTTGTGAAATGCAGTGTTCTCTCTTAACGCC	316	chr17	57060505	57060820	+	none	TRIM37	11.5049	33.2128	0.00332463	1.3937	11.7455	12.0768	10.6241	6.89423	15.868	3.02496	18.3426	13.4627	40.7191	11.3414	22.7866	25.7587	46.6505	22.9438	42.6824	32.6353	29.3035	30.8692	64.8996	8.35517	47.5127	26.205	74.888	3.85429
102495	CTGAGTCCAGAATACCTAGAAATTTGGAATTTGGCTATTGCCGTGTCTGGACTGTGAGTATGGGAAGGGGAAACTTTTCTGTCTGTTGTCCCCACTACCGCCCCTCACATCCGTGATTCTGAACCCCATGATAAATGCCCTTTGAACCTTTTTCCTCCTTTTGATGCCGAATCCCCTTTTATGGGACTCCGCCAGCACGGGTGCATTTAACCTTCCTGAGCTTGCCCACCTGACGCATGCAGCCAAGAAGCTTTGAAAGATGGAGTGCCCTGGCTGAGGGTTCCAGGTCTCAGCAAGGCCACGAGGTGGTGACTGCCTCCCAGAACTCTGTTGGGCCACCCTCCGTCCTGGAGACCCCCAAAACCTCCATAGCACCAACTCTGCCCATTCACACACACA…	786	chr22	19928020	19928805	+	none	TXNRD2	0.587435	20.5573	1.55582e-07	3.46076	2.93637	0	0	0	1.76312	0	0	0	56.8174	24.195	12.4291	39.8088	12.8289	31.0416	33.1007	19.5812	26.4676	2.20494	7.31263	47.6245	0	0	3.94147	11.5629
11533	TCCGGGGTAACTATGGGTCACGCAGAGTCTAAACATTATGCTTATCTCTGCTATATTAAATTCCTGTTAAAATGGGGGAGTTCGGGTTCCCATGGAAAATATGGTCACCCTATTCAGGGCAGTGGAAGAACACTGTCCTTGGTTTCCTGAAAAGGGAACGTTAGATGTGGAACTATGGGATCATGTTGGTGCAAAATTCCGAGAACTGGTCCCAACAGGAAATTATGTTCCTGTCACTGTTTGGGGTGATTGGGCCTTGGTACGTGCCATCCTAATGACATACCAATCCCGTGACACCCTGCAGTTACCACAGTTTTCTGAATCTGGCCACCCTCTACCTCTTCCTCAGCTTTCCTCTCCCACTCGGCCTTCATTATCTGCTCAGCCCCTCCCTTTGCC…	1096	chr22	19923442	19924537	+	none	TXNRD2	2.7464	45.9244	2.11425e-05	2.83928	0	2.41537	2.89748	0	9.69714	5.29368	1.66751	0	37.8783	49.1462	51.7878	105.376	19.8265	161.956	50.5221	44.9641	74.6766	0	15.5393	105.275	2.02182	2.0964	4.72977	8.99335
94882	AAAAAATTCTCCCTAAACGAAGGCAAGCCAGTGTCATGGAAAAACTCCCAAACCAATACCTGGGAACCTGGAACAATTATAACGTGGGGAAGAGGGTATGCTTGTGTTTTACCAGGAGATCGTCAATCCCGTCTGGGTGCCCACTAGGAGACTTAAACTTCGTGTGAATACTGACAATAAAAACCACGAGGAAGAGACGTTCGCGTCAGAGACTGCCCTCATACCTGATGAGATCTGTACCGACTCCTCAGAAACTGGCATGCCAAATCAAAATGGGTCTGGTTCAATCCTCCCTAATGGCAATGTAAACCCCTCTAACTAATCCCACTTCTCCTAATTATCTTTTTCTCCTTACGAACCTAAAAATCTCACCATTTCTATTAGCCTGAAAATAACATC…	649	chr22	19926497	19927145	+	none	TXNRD2	4.98031	40.1165	3.71337e-05	2.42437	2.93637	4.83074	6.76079	1.72356	3.52623	11.3436	5.8363	2.88486	100.377	49.9023	31.0727	87.8136	16.3277	101.223	40.9403	32.6353	59.5522	7.7173	10.0549	81.8807	2.02182	2.0964	11.8244	6.42382
47933	CCGCTCAGCCAGGAGAAGGCACTGCATTTAATGTTACTATGGGTTATAAATACCCTCCTCTGTGCCTTGGACATGCACCTGGTTGTATCCATCTAGAAGCTCAAGTCTGGGCTGCTTGTCTTCCAGAGAGATTAGCTATAGGGAAATGGGGACATTTGGTCTCTGGCCTCTCCCTTTCTCCTTTAAGACAAATAAAAAGAGGAGTAATAGGAGATACCCCATACTTTCAATATAAACCTGTAGGAAAACCATATCCTAAAAATTTTGAGGGCCCATCTAAAACTTCAATTTGGGAATGATTGTGTTAACTCACATGCAGTAGTATTAAAAAATGACTCGGCTGGGCGCAGTGGCTCATGCCTGTA	365	chr22	19927147	19927511	+	none	TXNRD2	7.40438	50.0499	6.53665e-05	2.27756	5.87273	4.83074	4.82914	8.61778	6.17091	11.3436	10.8388	6.73135	132.574	80.146	51.7878	86.6427	25.6578	105.271	47.0378	65.2705	74.6766	2.20494	19.1956	77.7031	3.03273	3.1446	11.0361	15.4172
42972	AAAAAAACTACACTGTTAAAAACTTAAAAGCGGCCAAGCCGGCTCAACAAACACGGCCAAATGCTCCTGCTACTGTTTGCCTGCGTTGTCGTAAGGGTAAACATTGGGCAAGTACTTGCCACTCAGTCTGATATAGATGAAAATCCCTTGCCACAGAACCAGGGAAACAGGAAGCAAGGCCAGTCCCAGGCCCCAATATCAAATGGGACACCTCGGACTCAGACCAATGTTGTGTTTTTGCGTCAAGCAGTCCCAACGCAGCCCCCAGCACAAACAAATTTACCTACAGCCAATCCAGATGGGTCCCAGCCTCTTCTTCTGTCTCAGTACAATGCTTGTCTACCTCCACAGTAGGCAGCAGGGCGGTCGATCTCTGTAGTACCATTCCTCTAAATTTAC…	782	chr22	19925219	19926000	+	none	TXNRD2	5.3538	54.2262	7.29796e-05	2.53497	2.93637	9.66148	6.76079	0	12.3418	5.29368	5.8363	0	112.688	85.4387	78.7175	90.1553	26.8241	120.117	48.7799	62.3696	62.388	4.40989	14.6253	127.834	4.04364	0	8.67124	20.5562
52591	AAAAAAAAAAAAAAAAAAACCCCAAAAAAACAACTCATATGGTTTAGTAACAGACTGGGCACGAAAGGGCTATTTAAAAAACAGTTGCTCCTCTGGCGGAAAGGAATGCCTGGAGACTACTTATTTTATTTCTTACTGGGAGGACCAGGATCATCATCCTATTTTGCATAGAAGGTTCAGTTTGTTCTTTCCCTTAAAATAGGAAGATAAGGGCATTATCCCCCTAAGTCTCGTATGATATTCCCCATTCT	251	chr22	19927771	19928021	+	none	TXNRD2	2.99994	32.66	0.000226804	2.49181	2.93637	4.83074	2.89748	0	7.05246	3.7812	2.50127	0	104.165	54.4388	14.5006	46.8339	12.8289	87.7262	36.585	36.9866	43.4826	0	8.2267	61.8283	2.02182	0	3.94147	8.99335
118556	TGATACTGGGGCTGATGTTTCTATTATTTCCTCTAATTTATGGCCTTCCTCCTGGCTTAAACATCCCACTAACATGAAACTAGAAGGTGTTAGAAAAGCTGAAGAAGTTCACCAGAGCACATTTATCTTGGCTTGCACTGGCCCTGATGGTCAAAAGGGAACAATTCAGCCTTATATCATGCCCATCCCCATTAATCTTCGGGGCAGAGATTTGCTGGCACAAATTGGGGCTGAAATTAATATTCCACATAACTTTTACAGTGCTCCCAGTCAACATATAATGGAAAACATGGGGTTTGTTTCCAGACTCGGTCTCGGTCCAAAACGTGAAAAAATTACTAAACCTCTTCAAGTTACTGTAAAAGAAGACAAGGCTGGTTTAAAAGCATAATTTAACTA…	498	chr22	19926005	19926502	+	none	TXNRD2	4.63647	46.5316	0.000299383	2.43599	2.93637	8.45379	3.86331	0	6.17091	9.83112	5.8363	0	91.8548	48.3901	61.1096	86.6427	19.8265	94.4743	54.8774	55.8426	85.0746	4.40989	13.7112	111.124	0	0	9.45954	7.70859
29387	ACCTTTTGGCAAAAGCTGTTCTAACTCCATCTCAGCATTTACAATTCCATACCTGGTGGTCAGAGGAGGCCCGCCTGCAGGCTCAGCTAAATCGGGCTGATGGCATTCCAATTACTCAGGCTCAGCTCACAGGCTCCGATAATTACTCTGATACTACTGCTCATTTAGGCTTTGATGCTCTCACCACGGAACAAGTAACAAAGGTGTGTATGAGAGCTTGGGATAAATTACGCACCCCAGGCCAAGCTTCTGTTTCTTTTACTATTGTTAAACAGGGTCACAATGAATTATATCTTGATTTTTTAGCTAAATTACAAGATGCTGTTGAAAAATCTGTCTCTGATGAGCACACTCAAGGTATTCTTCTTCATATGTTAGCTTTTCAAAATGCGAACCATG…	613	chr22	19924613	19925225	+	none	TXNRD2	9.85686	73.6705	0.00135362	2.17737	5.87273	18.1153	7.72662	0	15.868	15.881	12.5064	2.88486	161.93	77.1217	107.719	120.597	26.8241	186.249	60.1039	112.41	87.9104	2.20494	13.7112	181.307	3.03273	0	15.7659	21.841
17000	CCACAACAACAAAAGTGTTCCATATCGGAAAAGCCAAGGTTGTCATGTTTTGTTTAAAAAAGAAAAACGACAAAGCACAAAACCTCAATCCGACCTTTCTGCAGTTGAACTGTTCCAAAGGGGACAGTAGGTGGATGACACTGCCTCTTCAACACGACTGCTGGGGATTTTTCTCTGACAAACATTGGTGTCTTCTTTACAAAGAGCAAAGAGGAAGGTCACCAACTTGCTTCAGCTCAACATTAAACTCAACACATATAACACCATGACATCACACACACACAGTGATGTTCCCTGCAACTGGGCTCGATGCATTATGTCTGGAGGGCGAGGGCT	336	chr4	96083935	96084270	+	none	UNC5C	1.38373	13.1979	9.77814e-07	2.63812	0	0	1.93165	1.72356	2.64467	2.26872	2.50127	0	6.6287	26.4633	11.3933	11.7085	9.33011	4.0489	16.5503	10.8784	9.45273	9.92224	6.39855	5.0131	13.1418	35.6388	30.7435	3.85429
103092	CGACATTCTGCAGAGATTCCCAACCTGGGATTCCAGAAGATCTCTGGACAGGTCCCTTCAGTAGGCAAGCGTCTGAGTAGACAGCAGGCTGATGAAGAGCTGCTAATAATTGGTGGGCTTGCTGTGCCAGTACACTTGCGGAGTACCTGTTGGTTTGTCCTGCTGATGCCCCCCAACCATGCTAAATAGGTCTGAGGCACACATTACATTTGGTTGAATGAGCCCGTTAATATCCTACCACAGATGAAT	249	chr4	96084937	96085185	+	none	UNC5C	1.33774	13.8115	1.98511e-05	2.57072	0	0	0	0	1.76312	2.26872	6.67005	0	8.52261	21.1707	13.4648	15.221	5.83132	2.69927	14.8082	7.25228	6.61691	11.0247	6.39855	5.0131	7.07637	52.41	37.0499	6.42382
89114	TATGCTCTCTTGCAAGTCCTTATATAGGTTTATATTTTCCTGGCCCCATAGGGGCAGACCTTATAGAGGCAAAGACCTTTGAATTCTGGGGAGATGGTGATCACCTTATTAACTCCCTTCTGCATACGTGGATTACAGAGGAGTAAGCAGACCAAGAGCACAGCTGCTGTGATCCTGACAGAGACACACAGAAGGACACGAGACAAGAGCCTTGTTGCTCTTTGCCAGGAGAAGTGAAAAGTCTTGATTCCACCCTCAAAACGTTGACTTTTCAGATACCTTACTTGTAGGAAAAAATACCTTAAAAAAATTACTGGTCGCATAGTTTCAGGGTGTCCTGAACTCAGTCCCCACGACTTTTTTCTCCT	368	chr4	96086039	96086406	+	none	UNC5C	4.1205	20.9731	9.93629e-05	2.0301	4.40455	3.62305	3.86331	4.30889	2.64467	3.02496	9.17132	1.92324	8.52261	34.7804	19.6794	14.0502	16.3277	16.1956	30.4875	12.3289	20.796	3.30741	8.2267	12.5328	4.04364	79.6631	41.7796	12.8476
43357	CAAAAGCTCTTCCATTCTCAAAGAAGATGGATAAAGTCCCATTTCATTTCAGCTGTGTTTCCATGGGACCCCTCTCATTCATTAGCCTTGGGCTTACACTGAGTTCTCCACATGAAACTGATGACTTGTCCAGAACAACTGCCCAGCAAAAGCTAAGACTCATTCAACTTGAAGGCTTGAAAACCCAACAAGTAAACCTTTTC	203	chr4	96085827	96086029	+	none	UNC5C	4.00524	19.3029	0.000122523	1.94439	0	2.41537	3.86331	3.44711	1.76312	9.07488	6.67005	4.80811	10.4165	31.756	21.7509	14.0502	9.33011	5.39853	25.261	13.0541	9.45273	11.0247	14.6253	12.5328	13.1418	73.3739	34.685	8.99335
97399	GAACCCCAAGGGTTCTCAGTGACTTCAGTAAGACAAACAATTCCTGTTTGTGTTCAATAGTTCTGTGTTGGTGACTTTTTAGTCAAAATAAGTTTTTAGTAACAGTTATGGAATTGATTCATGTTCATAGCTACATAGTTGCTCCCCTCTAGTTTTCACTAGGCATAGAAGTTTCTTTGACCATTCAGTTCAGATTCTAGTTCTTGATTTCCATAGATGATTCCA	225	chr4	96087640	96087864	+	none	UNC5C	2.35056	12.6328	0.000151508	2.03942	2.93637	0	2.89748	0	1.76312	4.53744	6.67005	0	6.6287	18.9024	13.4648	4.68339	9.33011	8.0978	17.4214	13.0541	15.1244	9.92224	5.48447	1.67103	9.09818	36.687	19.7074	12.8476
87308	CTAATATTGAGATGGGTGATGCAAATGAAAAAAAAGTGAGAATAAGAAAATTATAAATTTGAAGTGAAAATTTCCCTACATCTGTTTGTCATAAAGGTCCTTGAACTCTACAGGTTTTCATTCCCTTCGTCAAACACATTCTAGTGAATATTAAACTCAGGTTAGATTGTGTTGTACACCACTAGATGGCAGCATGCACAAATGATAGTTTTTTCTATCCAAATGAAACCAGCCAAACTGCCTCTCCAGCGGTGTAGAAAGAAGCAGGATGTATCACATAGAATGGTTGATGAAGTGGCTTCCTATGAAATGAACTGTTATATCTGGACCTTCTAAGTTTGAAAGCAATCTAACAGCTATTACTTTAC	368	chr4	96087087	96087454	+	none	UNC5C	1.92295	10.9756	0.000179723	2.0561	0	0	0	2.58533	3.52623	1.51248	5.8363	1.92324	4.73478	13.6097	12.4291	10.5376	6.99758	4.0489	9.58177	5.80182	9.45273	7.7173	11.883	7.51966	6.06546	40.8798	20.4957	3.85429
104656	AGATACATTAAGGAAACTTGAAAGAGTGTGATAAGAAGAAAATAAAAACAGGATGAAACCTCTGCCTTTGGATTCCCAAATTCAGCAGAAAAGAAGCTGCTTTCTTCCCTTTGATTAACAACCCCAATTTTCTCTTCCCTAGACATAGTATTCCATTCGCATATATAAGACTTATTTCTTTCTAAGCAGATACTTCTTACATTTCCAAAGATAAATATTAAGGAACTAAAAGGAGATTTAAAGTATACAAACCCCAATGAAAACCATAAGTGTTAAAAATGACAACTCTTCAAAGACTGTTTTATATAGATTTTACATAGTTCTGTTACAAGAAGCAACTGAAGATATGTTGTGTATGAATGAGTTGATGTACTGGGCTCACAGTGACCTAATATTGAG…	402	chr4	96086699	96087100	+	none	UNC5C	5.59102	20.1168	0.000430375	1.63858	2.93637	3.62305	1.93165	6.89423	9.69714	6.04992	11.6726	1.92324	12.3104	23.4389	13.4648	10.5376	18.6602	9.44743	20.9057	11.6036	19.8507	9.92224	16.4534	12.5328	27.2946	62.8919	40.9913	11.5629
111771	CGGGATAGAAAAGGCAAAGGTATTTTACACCAGCTGTAGATTTCTTGCTCTTATATGTCACTCCGAACAGAGTTGTTTTAACATTGAGAACCTATGTAGCTCAGGTCCCCATTCTCTGATGCTGCCTCCATAGTGCTCAGGATCAGAGGCCAAAAGAGAGCCCATCAATCCTTAGGCTGCTGATCAGCAAAACCTGCCTACAATTCATCTTCTA	214	chr4	96084424	96084637	+	none	UNC5C	4.22048	13.5608	0.0089878	1.47074	4.40455	3.62305	1.93165	3.44711	1.76312	3.7812	10.0051	4.80811	13.2574	27.9755	13.4648	14.0502	5.83132	2.69927	23.5189	5.0766	14.1791	6.61483	6.39855	3.34207	10.1091	40.8798	24.4371	5.13906
121023	GAGCCGAGCTCTTTCTTTCACAAGAACCAAAAAGCATGGTCCACGCCCTATATGGAAGTGACCCTTGAAACCTATACACAAGATGAGACACAGATTGCAAATTACCTTAAGCTATTAGTGATAGAGAAAATGAAATCAGTGCATTTTCATGGGAAGCCACTGGACTGCCCCCTCAAGGGCAGGGACCATTCATTTTGGGGTTAACCACTGTATTGCTATTCTTTCCACAGATTCTGGAACATAATATGTGCTTAAGAACTATTTGCTACATAAACAAATGAAGAAATGAGGCCAGCCTTACCTACTGA	308	chr19	9489758	9490065	-	none	ZNF177	3.63081	14.4572	2.55691e-05	1.81882	4.40455	2.41537	3.86331	2.58533	1.76312	5.29368	5.8363	2.88486	10.4165	17.3902	21.7509	7.02509	5.83132	5.39853	20.9057	18.8559	22.6866	6.61483	15.5393	6.68414	12.1309	22.0122	25.2254	12.8476
61610	TGTTTATGCCATTGGATGTTTTTCCCCCAGGAATGTTCTGCATAGCAATTGTATCTTTTGGTTTAAGTTGAGTTTCCCAGTCTGAAATAGCACAGGAATTTTTATAATTATTGGGAGAAAAGGTTGGGATCAAAGAAAAAGGGAGGGAGACCCTATGGATTTGTTTTCAAATAATATCTTCTAAGTAGAGAAATGTAAGAAAGAAGA	207	chr19	9490607	9490813	-	none	ZNF177	3.14954	12.4997	9.1793e-05	1.72888	0	0	4.82914	4.30889	2.64467	3.02496	7.50381	2.88486	16.0983	13.6097	26.9297	12.8793	4.66505	8.0978	13.0661	10.1532	11.3433	6.61483	10.0549	7.51966	7.07637	19.9158	16.5542	15.4172
106670	ATTTTTTTGAGCAGGGTCCAGCAATGCCCACTCCTCCTGGGAAAAGTCCACTGCCACTTCCTGGAAGGTTACTGAGTTCTAAAACATCACATACATATTCTGGCTCAGCCAATGACCATTTTTGACAATGTACCAGGAGAATGGTGGGTGAGGCTGACAGGACTGGAGAGGAGACTCAGGGCACTGGAAGCTCAGACATGCATCAGAGGCCTTCTCTTAATTTGCCTTAAAGCTG	235	chr19	9489481	9489715	-	none	ZNF177	4.40055	14.5939	0.00182307	1.52857	2.93637	0	7.72662	9.47956	5.28935	2.26872	7.50381	0	11.3635	17.3902	26.9297	3.51254	6.99758	10.7971	31.3585	15.2298	10.398	13.2297	10.0549	16.7103	10.1091	13.6266	26.802	8.99335
74867	CCAAATGTACTAACCCTCACTGGCCAAGGCTGCACCCTGTTCTGCCCAAGGCTCACCTGCACAGTCACCTTGTAAAATTCCTCTTTCATCTGTCTTCAGCTGTTCTTGATCCACCTTGGAGATCAGACTGTGTCTGCAGAGCTGATACCCTGCTCACGCAGAAAGCAAGGATGTGGGAGAAATGTGTGAGAATTAAATATTCCACAAAACTGATTGCCATACTTTGGCTTTAACTAAAGGATTATTAAAATAGTCAAGTGCAGCTTTAGGA	271	chr19	9490081	9490351	-	none	ZNF177	4.39131	11.7394	0.00410001	1.30981	5.87273	3.62305	2.89748	6.03245	4.40779	4.53744	5.8363	1.92324	16.0983	13.6097	25.8939	3.51254	4.66505	13.4963	16.5503	9.42796	13.2338	8.81977	7.31263	5.84862	9.09818	10.482	22.0723	7.70859
110243	AAAAAAAAAAAAAAAACTCTTTAGAAATATACCAAAGTAAATGCAATATCATTTTTGATTTTTACAAACTAGCTTCAAGCAGAAAAGACAAAAGCTTCAGGGGATACCATATGTTCACTCCCCAGGCAAAGCCTATCTGTGTGGGATTAATGACAGCATTGAGTGGGTGGCTGTGTGCCTTGTGGGAGAATACGTTACTAATGGTCACTGGAAGAAAAGGAGTCAGCTTTCTCTTTTCTTATGTCTTTAACGATGCTTAACTCTCCCTTATTTAAAATAAAACACATATTAGATTCTGCATCTGAACCAACATTAACATTCCATTTCTTTCTGCTAAATTAACTTTCTTGGACAACTGGATCATGTTCATGGATAGTGCCTCTCCCATCCACTTTTTCT…	586	chr9	79381099	79381684	+	PCA3	PRUNE2	0	77.9528	1.24868e-13	4.92145	0	0	0	0	0	0	0	0	57.7644	55.1949	72.5029	16.3919	82.8047	175.452	128.047	135.618	140.846	0	16.4534	3.34207	35.3818	156.182	168.695	2.56953
45464	TAAAATTAAAGCTAAAAGTAAACCAAATGAAACTAACATTTCAACCACAACAAAATCCTGCAAAACTGTTGAAAGCATTCTAGGTTTATTGCAACAATTTGCAATAAACTTAATTAAATGCTGATATGATATTTTCTTTAAAGTTTAAATTTTGTTTTTTAACCAAGAGCAGCTCAGTCAACCTAATAAAGAAAGTGAAGCCCAAAATCATTCCAAATAGCAAAGGGACAGTGGAGAAATCCAGAAATGACTGCTCATAATGGTCAGTATGATTAGTACCTCAACTTTGATAATATCTCAACTATCAATGCGAAAGTAAATTTGTGAAGGAAGATACCAAAAATTAAATTTCAAAAAATCTGAAAAAGAAGAATTAGTAATTGATAAACTAATAACTAA…	482	chr9	79385486	79385967	+	PCA3	PRUNE2	1.61089	179.438	5.64737e-13	4.57951	2.93637	2.41537	1.93165	0	0	2.26872	3.33503	0	81.4383	128.536	232.009	21.0753	136.453	403.54	272.645	418.457	325.174	2.20494	14.6253	5.0131	67.7309	356.388	394.147	11.5629
101238	TTTTTTCATGTGTAGCTTCTTATCACATAGGGAGTCCAAACATCACTTTCTCTGTGAGGGCTTTCTCTCCAAAGCACTGTTCTGCGGTCCAACCCTACCACTGTCACTGTCAACTCATACACAGGCATACACATACACAACGCATACACATGATCACTATTCAAAATGACCATTTTCCTTATTTATTGTTTATCATCTACCTCTCCCACCTCGCCACACCTTCCCCCCAAGGCGAAGGTAGGCTTCGTGAAATCTTAACCTTGCCTGTCTTATTCACTGCTGTATTCTGGTATAGCGTCTCCAACATACTTACTGATGAATAAATATCTGTTTAACAAATAAACTCTCTCTCCTCTACTGAAACTATTGTTGGCAGTCACCAAGGACCTATTCAAAACA…	458	chr9	79381679	79382136	+	PCA3	PRUNE2	0	46.0981	1.51442e-12	4.71239	0	0	0	0	0	0	0	0	22.727	46.1218	56.9666	5.85424	53.6481	107.971	80.1385	60.9192	103.98	0	8.2267	2.50655	23.2509	60.7955	99.3252	5.13906
13140	GTCGGGGGTCAGGGATTGCTGGAGTGGTAGGGTAATAATGGCTACTTTATCAAGGTGTTTGGGTAACACTAAGCAGAGTATTGAATGGCTGCAAATTGTACACATCAAAGCAGTTGTACACATTGAGTAAATGAATTTTCAAAAAATTCAGCAAAAGACAGAAAACAGGAAAAACCAAACCTAAATGTCATTCTGACTGAAGAGCAGAGCCAAGAATCTGCTACTGCTTTCTGTTTTTATTTCCAATTATTTCCCAGAGGGAGAGGCCACTATACTCCGTGTACTGCCCACAAAAGCCACCAACCACTCAGGTGTGGTTTGCAGACCACACCCTAAGTGAGAAAGGAAAAGCCACTCTGGCTTATTTGACAAAAAGCAGAAATGCTCACCTTGTGACAA…	703	chr9	79386446	79387148	+	PCA3	PRUNE2	0.452882	73.3071	3.47408e-11	4.40268	0	3.62305	0	0	0	0	0	0	40.7191	61.9998	88.0393	9.36678	64.1445	130.914	127.176	159.55	144.627	0	10.0549	2.50655	29.3164	156.182	141.893	6.42382
9206	TGTTGACCAGGCTGGTCTCAAACTCCTGGCTTCAAGCAATCCTCCCATCTTGGCCTCCCACAGTGCTGCGATTAACAGGCATGAGCCACTGTACCCAGCCTGACTATGTAAATTATTGACAGACAGTCACACATGGATTTCAAAAAATTAAGTGGCTTTAACAGAAGTTGGGAAGCCCAACCAAGTCACTTTTTGCTCCTTTCCTTCAACAGGAAAAATGTATGTTTCCTCCAAAACCTTGCCACCTGGGAAAAGGAACAATTTGTATT	269	chr9	79387681	79387949	+	PCA3	PRUNE2	0.826964	92.5127	5.27313e-11	4.31511	0	0	0	0	0	3.02496	1.66751	1.92324	52.0826	85.4387	116.005	18.7336	64.1445	163.306	148.953	184.933	131.393	0	12.7971	1.67103	36.3927	207.543	249.101	7.70859
34897	AGGAGACAATTAAAGGCTGGAAGGCACTGGATGCCTGATGATGAAGTGGACTTTCAAACTGGGGCACTACTGAAACGATGGGATGGCCAGAGACACAGGAGATCAGTTGGAGCAAGCTCAATAACAAAGTGGTTCAACGAGGACTTGGAATTGCATGGAGCTGGAGCTGAAGTTTAGCCCAATTGTTTACTAGTTGAGTGAATGTGGATGATTGGATGATCATTTCTCATCTCTGAGCCTCAGGTTCCCCATCCATAAAATGGGATACACAGTATGATCTATAAAGTGGGATATAGTATGATCTACTTCACTGGGTTATTTGAAGGATGAATTGAGATAATTTATTTCAGGTGCCTAGAACAATGCCCAGATTAGTACATTTGGTGGAACTGAGAAATG…	845	chr9	79393317	79394161	+	PCA3	PRUNE2	2.17004	168.196	5.2913e-11	4.23995	0	7.24611	1.93165	0	0	1.51248	6.67005	0	82.3853	80.146	220.616	16.3919	389.532	350.905	299.648	346.659	276.02	4.40989	34.735	7.51966	69.7527	236.893	270.385	5.13906
4124	AAAGTGCTGGGATTACAAGTGTGAGCCACTAGGCCCGACCCAATTCTTTAAACCAGAATAAAATAATGATTTAAAGAAAGTTAAATATGGAGGAAACAGGGGAGCTTTAGCACCTTTGAGTAGTGAAAAGATTGTAGATTTTAGAGACAGAAAAACATGAGTTCAAATTCTGTTACCAGCTATGAATTACTTTTTGTTGCTGAGCTTCTATTTCCTCATCTATGTAATGGGAACACTAATATCTACTACACAGATGAGTTATGAGAAACAAAAATAATTTACATAAAGTTCTGGGCACTCTGTAATCACTCAGTGAATTATAAAACACCATACTTCAAGTCCCAAAGAAGAAAAAAAA	358	chr9	79389635	79389992	+	PCA3	PRUNE2	0.690301	52.7403	1.87317e-10	4.13043	0	0	1.93165	0	0	0	1.66751	1.92324	27.4618	54.4388	56.9666	8.19593	50.1493	109.32	77.5253	114.586	66.1691	0	7.31263	2.50655	24.2618	119.495	119.033	6.42382
14312	ATGGTGGGAAGGACCTGATGATACAGAGGTCTGTAGGCCATGGGAATGGGTTTGGAATTTTATTCAAAGAGCTATGGGAAGTGACTAGAAGGTTTAAAGTTGGGGAAGAGGTTTTGTGTTTCTGTTATATTTGTGTTTTATACAAATTACTCTGGTTGCTGTGTTGATAGGACAGCAGAAGGGTAGGAGCAGGGACACCAGTTAAGTTATTGCAATGGTTAAGGTGAGAGGTGGTGGCTGGGCCTAGGCCTTTTTGGAGTGAACAAGCTATTTGCTTGGCTTCCATGATCCTTCTCCCTCCACTGGAATGGAAGGTACTTGATATTAGAGATTTTTGTCTGTTTCATCACTACTGTAACCCCAATGTCTACAACAGACTCTGGCACATAGAAGACACTT…	1397	chr9	79379444	79380840	+	PCA3	PRUNE2	0.856037	101.91	2.19429e-10	4.22899	0	2.41537	1.93165	0	0	0	2.50127	0	59.6583	91.4875	137.756	11.7085	95.6336	230.787	201.217	203.789	182.438	0	9.14078	2.50655	31.3382	169.808	199.439	3.85429
7888	TTTTTTTTTTTTTGGAAGTATCTGGATGTTCCTTAGTCACTTAAAGGAGAACTGAAAAATAGCAGTGAGTTCCACATAATCCAACCTGTGAGATTAAGGCTCTTTGTGGGGAAGGACAAAGATCTGTAAATTTACAGTTTCCTTCCAAAGCCAACGTCGAATTTTGAAACATATCAAAGCTCTTCTTCAAGACAAATAATCTATAGTACATCTTTCTTATGGGATGCACTTATGAAAAATGGTGGCTGTCAACATCTAGTCACTTTAGCTCTCAAAATGGTTCATTTTAAGAGAAAGTTTTAGAATCTCATATTTATTCCTGTGGAAGGACAGCATTGTGGCTTGGACTTTATAAGGTCTTTATTCAACTAAATAGGTAAAGAAACCTCCATGACAGGA…	1211	chr9	79394150	79395360	+	PCA3	PRUNE2	1.50201	124.149	2.80511e-10	4.13357	0	7.24611	0	0	0	2.26872	2.50127	0	58.7113	93.7558	203.008	8.19593	172.607	209.193	224.736	290.816	146.517	3.30741	16.4534	2.50655	46.5018	302.93	199.439	7.70859
66875	CATCCCTAAACCTAATTCCACTCTTCTCTATTTCCTTCCAAAAAATTCCAGCATTTTCTGGTGTGAGATTTGGGAGGGATAGGAATAAGAAAGAACACTGATACTACTTCTAAGCATCCCTTCTTTATAACTACAAAAGACAATCTCACGTGCACAGAGTAATCAACTCATGAGTAAATATTTAACATTTCAGTAAAGACAGTAAGCACAAATGAAATTTTTTAAATTTTTGTAAATTTTAGGGGGTACAAGTGCAGTTTTGTTACATGGATATTGAGTAGTGGTGAAGTCTGAGCTTTTAGTGTAGCCATCACCTGAATAGCAGACATTGTACCCAATGG	341	chr9	79390837	79391177	+	PCA3	PRUNE2	0.241457	47.7211	2.95191e-10	4.25319	0	0	1.93165	0	0	0	0	0	17.9922	32.5121	88.0393	8.19593	36.1542	98.5232	98.4309	95.0049	63.3333	0	9.14078	1.67103	9.09818	90.1451	112.726	2.56953
112678	GAATAGGACCAGACAGAAAATCAAGTTTATTTGGTCGGGGGGAAAGAAAGGACTTTTTCACTAACCATCTGTGTGAAACACTGGAGGAGAAACAAGAGTCTTAGAATTTGGGAGTATAAATGAAAACATCCAGCTAGAATGCATCTCTTTGCAATGACAAAGAGGAACAATATTCTCAGAGGACCATTTTGTACTTTGTCTTTTTTTTTTGAGACAAGGTCTCACTCTGTCTCCCAGCCTGGAGTGCAGTTGCACGATCACAGTTCACTGCAGCCTTGACCTTCCAGGCTCAAGCGATCCTCTCACCTTAGCCTCCAGAGTAGCTGGGACTACAGGCATGCACTACCATGCCCAGCTAATTTTTGTGGTTTTTTTTTGTAGAGATGGGATCTCGCTATG…	409	chr9	79390021	79390429	+	PCA3	PRUNE2	1.40974	80.6571	4.11138e-10	4.01763	0	3.62305	0	0	0	2.26872	2.50127	2.88486	39.7722	58.2193	89.075	11.7085	78.1397	178.152	162.89	162.451	107.761	2.20494	10.9689	2.50655	36.3927	168.76	178.943	2.56953
69476	ACACAAAGGGCCTGGACCTTTCTTCCACTCAGCGGAGATTCTCGGCACTCCTAAACTGTTCCTCTTGGGTTGGGTTCCCACATCTGCCACTGCACCAATGCCATCAGGGTAGCTTCCTCTTGGGCCCTTCTTTCTCCCCTGCCCCATAGCCCTTGAGGTTGTATATTGCTGAGAGATGATGTTGTTTGAAGGAGAGAAGTGGGGGAGGGCAGAGAAGGGAAGAAATGCAATGACCCAAAGCATGTGAAACTGCTAGGGACAAAGGGTAAGAAAGACCATTCCAGGATTCCACAATGAAGTAGGAGAGGGGTGCCAACCTCAGTTTTAGTAGGGAGGCTTCTCAGACTGCCCTGTTCTCAACAGTGGGGAAAAAGTCTTCTGAGAAAGAATATAATAAGC…	1349	chr9	79391858	79393206	+	PCA3	PRUNE2	0.850381	98.5244	4.71676e-10	4.15979	0	3.62305	0	0	0	1.51248	1.66751	0	39.7722	72.5851	166.757	16.3919	61.812	187.599	203.83	177.681	134.229	0	10.0549	2.50655	23.2509	215.929	260.137	3.85429
16892	AGATGTGGTAGGTGTTTCCCACAAAGACAGCTACTGAGAACCAATGAGGAGCCAGCTCCTCCATCGTATCGGGAGATGCCCAGGTGGGGATCTGCCCAGGACCACGCAGGCTACGCTGCAACCTAGGGTGTGCCTGCAACCCTCATCCCCGTGTGTTTCCCATCTGAGAAAGTGGTCTAGGACATCCACCAAGTTTTTATGCTACGTACCTGAGAATAATCCATGACATTTTTTCCTCCCTAGTCCCCATAGCCAGTCCATCAACACATCCTATTGGTTATTACTTAAATAAATTAGATATATTAAATATCTATAAAAATGTATCTTGAATTTTTCTACTACATTTTGACTGCCCCCATCCTACTTCAAACCATGGTCACCTCTCCCATGGTCTATGAA…	1194	chr9	79395681	79396874	+	PCA3	PRUNE2	0	45.2266	5.34658e-10	4.29025	0	0	0	0	0	0	0	0	23.6739	41.5852	69.3957	4.68339	53.6481	56.6846	87.9781	99.3562	66.1691	0	12.7971	0	16.1745	92.2415	95.3837	3.85429
84429	GGCTCCCAAAGTGCTGAGATTACAGGCGTGAAACACTTTCAATATATGTCGTTATATTCTGATGCTTGTATTTCTGTAGGAGAGCTTATCAAAGTAGGCTTGCTGGATAAAAGGGAACGTGAACTAAAAACTTAAATCAACATTTCTGGATTACTTTCAAAAAAGCGGTAGCAATTAAAATTACCCTGAACATTCTGTCATAGTTTCTCAAAAATACTTTAAAATAAAAAAGTAAATGTTTATGTTTCAAATAATTAAATTGAAAACAATCCTGAAAATGTATTATAAAGATTAACTAGACAAGAGCAGTGAAGTCCATTTCTTAGGATTAAAAACATAAAATTTATTAGCATCATAACCTAATGCAGATATCCTCCCAGAATATCAGGACCTTGCCAA…	891	chr9	79384594	79385484	+	PCA3	PRUNE2	0	52.543	5.5498e-10	4.30342	0	0	0	0	0	0	0	0	26.5148	51.4144	66.2884	2.3417	51.3156	117.418	87.107	84.8517	66.1691	0	5.48447	1.67103	17.1855	112.157	148.199	2.56953
39352	TGTGTGTGTGTGTGTGTGTGTGTGTATATCCCTGCTGACTAGATCATCAACAATTTTGTCAAAGTTGAAGTCATCTCATAAAAAATTCACTTCAGAAAATAATTTATGGTTTACCTCACCTTAATCTGACCACTTTCTTTTGAATTTCTTACCACCCAAGTAATTGGAATCTTCTATGATTTAATCACAAATCACTGGACATTTGCATGGTATGAGACTCTGTATGGATTCTATGCTACATTAAAATAAAAAAGAAATTGTAAGTCTTTACTTTGCATAATTCCTACCACCAAAAACGCTGTACTTTATAAAAAATTTAAATTACAGTAGTAATAGATGCCTTGTTTTAACAAGTCAAACAAAGATATATAACTCGACCCTTTCCAGTCCTCTCAGCAG…	456	chr9	79383516	79383971	+	PCA3	PRUNE2	1.38972	85.7447	6.80899e-10	3.99966	0	2.41537	1.93165	0	0	1.51248	3.33503	1.92324	42.6131	65.0242	82.8605	12.8793	96.7999	174.103	172.472	185.658	156.915	0	7.31263	1.67103	34.3709	137.314	195.497	6.42382
91712	TCTTAGAATCTTTCATTATGGTACTCATATATGGGTTGGATCTTATTGCTTTGCTTTTAAAATAAGAGATTATTATACTCTGGTTTCTCTTCAGATCGTATAAATCTCTTGCCCTTTAAAATATGAGATTAAATTATACACACTATTCTGCAGCTTAAAACAATTTTTTACTTCAATACACTGGGGACATCCCTCAGGGTCAATACATACAGAATAACTGAACTGTTTTCCAGTAGCTCCGTAGCACTTCTTTGCATGGCTGTATCATAATTGATTCAATCCTTCCTCTATTGATGGACATTAAGGTTGCTTTCCATTTCTTCCAAGTGAAAAATGTTGTTAAGAGTTTCGCTCTTCTTGCCCAGGCTGGAGT	373	chr9	79384019	79384391	+	PCA3	PRUNE2	0.51036	40.8832	9.37877e-10	4.03242	0	2.41537	0	0	0	0	1.66751	0	15.1513	29.4877	42.466	4.68339	38.4867	85.0269	82.7517	100.807	65.2238	0	10.9689	2.50655	19.2073	87.0005	67.7934	2.56953
44747	TTCTTTGTTGACTTCTCATCTTCCTCCTCCCCTAACAGGAGGCACCTTAAAGCCTCATCTCTTGACCCTATTTTGTTTTAATACATATCGTGCATCTCTCGTGAATCTTTAAATGAATCCAGCCTGCCCAGCACAAGTCTATCCAGGGGTGTAAAAACCCAGCTGGAGGGAGTGCACACTGGCTCCTATCTTCTATCCGAACACTGTCCTTTTCGGTGTTTTCAGCATTACCCTTCCATGCCCACTATGGCTATTCTCATCTTCCCTGGCTTCCTAACCCTCTTGGTTCCTCACTTTGGGTGTAAAAGAGCAAGGACTGGAAGTATTAATAATTGTACATTCACATCTCTCTGATCTTCCCTGTTCTTTCTTCGATGATTTGGAAACTGCCCTCCAGCT…	633	chr9	79382538	79383168	+	PCA3	PRUNE2	0.18906	31.587	1.3911e-09	4.07617	0	0	0	0	0	1.51248	0	0	18.9391	31.756	35.2157	2.3417	36.1542	79.6284	56.6196	52.2164	71.8408	2.20494	7.31263	1.67103	5.05455	52.41	52.0275	0
52646	TAACAAAATGAAAACGAATAAACTCAGAGTTACAGAGTCCTCAAAAGCTGTCAAATATGAATTATTTCTTCATGCACTTAATAAGTCCTACTATATGCTGGGCACTCTTCTAGAAGAAAGAGCTATGAAGCAGAGTCCCTGCTCAAGGAGACAGACACAAACTGCAGCAATGTGACATGAAGGCAGGTACAATGAGGAAGACTACGGTG	209	chr9	79386236	79386444	+	PCA3	PRUNE2	2.28077	129.961	1.65337e-09	3.92158	2.93637	4.83074	3.86331	0	0	3.02496	1.66751	1.92324	64.3931	119.463	234.081	10.5376	116.626	257.78	217.768	228.447	185.274	0	10.9689	1.67103	45.4909	278.821	300.34	7.70859
33042	CCAGCCTTATCTGTCATCACCATCAACCCCTCCCATGCACCTAAACAAAATCTAACTTGTAATTCCTTGAACATGTCAGGCATACATTATTCCTTCTGCCTGAGAAGCTCTTCCTTGTCTCTTAAATCTAGAATGATGTAAAGTTTTGAATAAGTTGACTATCTTACTTCATGCAAAGAAGGGACACATATGAGATTCATCATCACATGAGACAGCAAATACTAAAAGTGTAATTTGATTATAAGAGTTTAGATAAATATATGAAATGCAAGAGCCACAGAGGGAATGTTTATGGGGCACGTTTGTAAGCCTGGGATGTGAAGCAAAG	328	chr9	79400022	79400349	+	PCA3	PRUNE2	24.557	1020.2	1.87285e-09	3.82282	11.7455	64.0073	39.5989	1.72356	2.64467	19.6622	41.6878	15.3859	905.291	348.56	1260.52	142.843	3265.54	3156.79	1176.82	1040.7	2450.15	7.7173	213.894	23.3945	482.204	1056.58	757.551	34.6886
43864	AAATGGCAATAGTCATTTTGGGGGCTATGCAACCACAGCAATACATAGGTTGGGGCATAACCAATCACTTGCTACGTAGTCTTGAAACTCTGGGAACTGTCTGTCTCCAAGCTCTAAGCAAACTCTTAAAGGAAACCAAAAATAACCTTCTGTAGTTTTGCAAAAGTCTCCTCCCATGGACAAGGTTAACTGCAACTTGTGAACATGGTAAATTATTTTCTTTCTTTTTTTTAGAGACAGGGTCTTGCTTGTCCCCCAGGCTGGAACGTAGTGGTGCAATCACAGTTCACTGTAGCCTTGGCCTCCCAGACTCAAGCAATCCACCCACCTCAGCCTCCCCAGTAGCTGGGACTATAGGCACACACC	366	chr9	79387266	79387630	+	PCA3	PRUNE2	0.76554	56.5864	3.76841e-09	3.91123	0	3.62305	0	0	0	0	2.50127	0	36.9313	45.3657	60.0738	7.02509	33.8216	107.971	117.594	95.0049	98.3084	0	10.9689	1.67103	21.2291	129.977	135.587	3.85429
60698	GACTACAGACATCTCAATGGCAGGGGTGAGTTACATGGTAGAACGAAGAATAGACCAGAAGCCAGAAGTGCTGGCCTTTAACCATATACCTGCTATTCGCTAGCTGTGTACCCTCTGCAAATGTCCTGGGTCTTAGATTGGTGTCTATGAATTAGACAATCTTTAAGATCTCTTCTAGCCTCCCCCATGTTACGTGTCATTTTCCTTAGGTTTCTTTTAAAGTGCCCAAAACAGTCCACATAGTAGGTATTGTGGTGATTAAACAGAAAGGCACTGAACCACAAAGCAGACACTTGATTAACATCAGTTGTATCTGACTATGCCTTTTTTTGTTTGTTTGTTTTTTGGAAACAGAGTTCC	360	chr9	79397724	79398083	+	PCA3	PRUNE2	0	29.8592	5.44511e-09	4.05804	0	0	0	0	0	0	0	0	9.46957	18.9024	36.2515	9.36678	32.6554	49.9364	67.9435	57.293	37.8109	0	4.57039	1.67103	9.09818	60.7955	81.9827	0
84298	CTGGGATTACAGGTGTGAGCCACTGCTCCCCAAGAAGTCATATGACCTGTGGGATCTCTAGAGGGGACCTCAAGAGAATGGTGTGTGTCAGGCACTGCACTAGTGACTTTATGTAGATTGCTTCATTTGTTCCTGCCAACAGCCCACTGAAATAAGTATTAAAATTCTGTGCCCAGTGAAGAAACAGAGAGGGTGTTTGTGATGCTCGGAAACCAATAATATTGTGTGTAGCTCTCAACTCAAGTTCAGGGTATGCTGACACCTTGCCATTTGTCTCCTCAAATGGTCGTATGTATTTCCAGGTGAGAAATAAGAAAGGCTGCTGACTTT	330	chr9	79398319	79398648	+	PCA3	PRUNE2	0	25.9724	9.3687e-09	3.99255	0	0	0	0	0	0	0	0	12.3104	22.6828	30.0369	3.51254	34.9879	55.335	63.5881	44.9641	36.8657	0	3.65631	1.67103	9.09818	40.8798	55.9689	0
112245	TAATTTTTCATTCCTTACCACCCTCCCGCCTTCCCACCTTTTGGACTCTCCGATGTTATTATTTCACTCTCTGTGTCCATGTGTACACACTGTTTAGCCCCCACTTACAAGTGAGACCATGTGGTATCTGATTTTCCATTTTTGAATTATTTCACATAGGATAATGATCTCCAGTTCCATCCATATTGCTGCAAAAGCTGAGTAGTATATCACGGTATACATTTACACCACATTTTCTTTTTTTTTT	247	chr9	79391179	79391425	+	PCA3	PRUNE2	0	25.1845	9.57771e-09	3.99383	0	0	0	0	0	0	0	0	11.3635	15.1219	27.9654	3.51254	24.4915	58.0342	49.651	44.2389	41.592	0	5.48447	1.67103	9.09818	58.6991	52.0275	0
113391	ACCTTCCAAAGTGTTGGGATTACAGGTGTGAGCTACTCTGCCCAGCCTATTTTGTCATTTTAAAAATCATTTTCTCAGTCTGTCCATATTTCTTCTCTTCAGGTATGCAAGGAATGTTATCTCTTTACATTTGCCCTAGAACTCCTCAAATTTTCTTGGATGTGAAAATAGTTGTACATCATCCCATTTCAGGCAAATTCTCTTGGGCCTTACCTCTCCCAGAAAAAGCACAAGGATTGCTCACCCGGCCTTCATGCCGGCTATGCAGGCCCATTTCTAACACATCCTTCTCTAGCCTTTAGCTCGGACCAACACCAAGTACCACCATTTCTATAACTTCCATTACTCCCCTCCTCCTATGACTAC	366	chr9	79390471	79390835	+	PCA3	PRUNE2	0.301921	40.7721	1.99379e-08	3.87238	0	2.41537	0	0	0	0	0	0	17.0452	32.5121	59.0381	8.19593	34.9879	87.7262	73.1699	88.4778	65.2238	0	5.48447	1.67103	11.12	75.4703	92.2305	0
116756	TACAGGCGTGAGCCACCGCACCCGGCCAAGTACATCTTATGTAGGTGCAGTAATGTAAGAATGTTTTTTTCCCTGTTCTATGTTTCAACTGGTAAAGGGAATTCAACAAGGAAACTTACTTAGGAGACCCCATGTGTTAATTTTGGTAAAAATAACCCCACAGAAAAAAGGTGGAAAGTAATTGATGGAATAAAGCAGGTAGAGAAATGAGACTCCTTTATAAAGAGAAGGAGCAAGTGAAAACTAAACGAAATGACTCTTAGAAGACAGTAGATCTATTTTAAGTCTTCAGGGCTAGGAAAGGACAGGTATTTTTAAACTTAATTGGGTCATTTCAAATAATAATTAGATTATTTACTTGAAAACTTGGGCAGAGTAGAGGGAAAAGAATAGGTTTGA…	489	chr9	79388633	79389121	+	PCA3	PRUNE2	1.3071	68.0494	2.47915e-08	3.70247	0	3.62305	2.89748	0	0	2.26872	1.66751	0	35.0374	66.5363	69.3957	4.68339	64.1445	130.914	99.302	155.199	103.035	0	7.31263	1.67103	21.2291	158.278	169.483	2.56953
17340	AGAAACAAAAATCAAATCAACAATATAATTTCTTACATTGAAATTTATAACCTGAGATCCTACCAGCTTCCCCTACTTTATATTACTTTAAGTTCATGCTTATTTCCCAAGTTAATTTTACTTCACCAAAGCGGTCTTTTGTTGTTGTTGGGATTCATCCAGCTTAAGGAAAAACTTTGAATTACTGTGTGCACTGACTGAGAAGGAATGCAATAAACAGGCCATGTTACTTCCAAATCCTTTTCATTGAAGAAATAGAAATTT	264	chr9	79387951	79388214	+	PCA3	PRUNE2	0.845283	74.2169	3.56854e-07	3.5692	0	0	0	1.72356	3.52623	1.51248	0	0	38.8252	49.9023	81.8247	2.3417	58.3132	157.907	117.594	166.077	113.433	0	7.31263	0	24.2618	183.435	183.673	2.56953
105149	ATGGCAACCAGCAATGACCAGCTCAGTGGCTGGACTGAGAAGAAGCTCCAAAGCACTTCCCAAAGCCAAACTTGCACCAAAAAAAAGGTCAGGGTCACTGTTTGGTGGTCTGCTGCTGGTCTGATCCACCGCTGCTCTCTGAATCCTGGCAAAACCATTACATCTGAGAAGTATGCTCAACAAATCAATGAGCTACGCCAAAAACTGCAGCATCTGCAGCTGGCATTGGTCAACATAACGGGTCCAATTCTTCTCCACGACAACGCTCAACTGCACCTTGCGCAAGCAGCGCTTCAAAAGTTGAACAAATTGGGCTACATAGTTTTTCCTCATCCGCCATATTCACCTGACGTCTTGCCAACTAACTACCACTTCTTCAAGTATCTCAACAACTTTTTG…	526	chr8	128032688	128033213	+	PCAT1	none	2.10564	21.1859	3.86488e-07	2.73585	0	2.41537	2.89748	1.72356	3.52623	3.7812	2.50127	0	13.2574	18.9024	20.7151	3.51254	9.33011	12.1467	12.195	36.9866	12.2886	47.4063	13.7112	68.5124	33.36	18.8676	2.36488	15.4172
68185	TTGAAGATGAGGAGCATAGTGACCAGCCATTGGAAGTCGACAAAGACCAATTGAGAGGAATCATTGAAGCTGATCATCTTACAACTACACGAGAAGTTGTCAAAGAACGCAATGTTGACCATTGTGTGGTCTTTTCGCATTTGAAGCAAATTGGAAAGGTGAAAAACTTGATAAGTGGGTGCCTCGTGAGCTCAGCAAAAATCCAAAAAAATAATCATTTTTAAGTGTTGTCTTCTCTTATTCTACGCAACAACAATAACCATTTTGCAATCGGATTGTGATGTGCAATGAAAAGTGGATTTGGGGCCGGGCGCGGTGGCTCACGCCTGTATTTCCAGCACTTT	344	chr8	128032067	128032410	+	PCAT1	none	2.104	22.612	2.96473e-06	2.73247	0	3.62305	1.93165	1.72356	7.05246	0	2.50127	0	23.6739	10.5853	12.4291	9.36678	10.4964	5.39853	16.5503	34.8109	8.50746	34.1766	18.2816	114.466	25.2727	23.0604	3.15318	11.5629
81581	AAGCTTACAGCTTTTTACTTCAAGTGCTTCTCAACCCATCAGACCAGAAGCTGGAAACTGCCAAGGGTAGCTCTCACACAGTGAGAGAAAAGAGACAGGGGATAAATATCCTAGCTGGCCTCTCCCTTGGCAGGAAAAGTCTGAGGTTTACACGGTGACTCAAATGGTCCCCAGAAGGATTGAACCCCTACAGTGGCAATGGCTCATTCGGACCCTCTTTATTGCTTTCTCTCCCTTCT	239	chr8	128031339	128031577	+	PCAT1	none	1.35564	13.0369	2.35295e-05	2.53457	0	0	4.82914	2.58533	1.76312	0	1.66751	0	50.1887	11.3414	16.5721	4.68339	13.9952	31.0416	9.58177	10.8784	4.72637	5.51236	3.65631	20.8879	10.1091	10.482	2.36488	2.56953
2649	TTTCACTGAGTAAATATTCCAAAGTAGAAGTTACATAAGCAAACATCCCTCCTCTATTAACTATTTAAGGTTTTCCCAATGTTTGTCTTGGAAAAAATACTACAGGGAAGCACAGGCATACATTTTCCCTTGTGTTTTAAATTATTTCCATAGGTTGGTCTTTAAGAAAAGGAATTATTGAGTAGAGGTTTTGAACACTTGAAGGTTTTTATTATATACTACCAAATAACTTTCTAAAGGGGCTCATTCTCATCTACATTCCCAACA	267	chr8	128027187	128027453	+	PCAT1	none	2.16004	13.0774	0.00071576	2.07934	0	0	7.72662	0	7.05246	0	2.50127	0	9.46957	18.9024	19.6794	5.85424	8.16385	10.7971	18.2925	25.383	6.61691	5.51236	8.2267	37.5983	23.2509	4.1928	4.72977	2.56953
106894	GTCACTCTGAACCTGCTCTTTGGTGTTTTCATGAGTGGTGGGAAGAATAGGGACCATATGGAGCCCACACAGGAAGCTCTAGCAGTAACACAGCAAGCAGGAAGACAATTCTAAGGAAGCAGCCCATAGTCTTCTTTCTTTTCCTGTGCATCTTCCACTGTCAGTGAGGCTCCTCATTTATGGTGAACCCAACTGTGTGTATCTCCCAAGTTCTCACCCGCAGATTAATGTTTTCAGGAAGATAGGCCATCAACAGTGAGAGGAAGAAGTTACATTGTCGTATGAGGGATGCATTTTAACCATTAATTTGTGGTACAGGCTGGGCGCAGTGGCTTACGCATGTAATCCCAGCACTTTGGGAGGCCGGGGCTGG	373	chr9	97329812	97330179	+	PCAT7	FBP2	4.03154	34.6261	9.80868e-10	2.74796	2.93637	4.83074	2.89748	4.30889	4.40779	8.31864	1.66751	2.88486	58.7113	14.3658	14.5006	45.6631	16.3277	40.489	25.261	6.52705	17.9602	37.484	81.353	47.6245	45.4909	38.7834	23.6488	39.8277
111158	AGCAGAGTTACGTTTTTTTTGTTGTTGTTTTTTTTGTTGTTGTTTTTTTAGGTTTCCGTGTGTTTCTATTGAGCTGCTCAGTGCCCGGCTTAGAAGACCAGGAAAAGGAGTCACAGGTCGTATGCTGGAGGCTTGAGCCGCGGCACCGTGGCGCGGCTCGCCTCGCTGCGGTTGGTGGTGGCGGTGGACATTGCAGCGCGGCTGGAGGGGTAGGAAGAAGAAGATAGTTTTGGGATAGATAGAGG	245	chr9	97317384	97317628	+	PCAT7	none	1.52453	22.3235	3.25908e-10	3.21302	0	0	0	1.72356	4.40779	1.51248	1.66751	2.88486	43.56	6.04876	14.5006	32.7837	17.494	20.2445	15.6793	4.35137	16.0696	14.3321	45.7039	28.4076	18.1964	29.3496	15.7659	34.6886
54066	GTATGCTAACAGCTACACACTAATGCACAGCCACCAACCCCAGATCAGTTACGTGAACTTCTGCATTCACAAACACACTTAACACACTCTGTGGCTATTGCCTCTTTACTGACCTGTAAGTCAGTTCTAGAAGACAGACGATCCATGAAGGCAGGTCCTAGCCTGCCCATTTGCATTGGTATCTCCAAGGCCAAGCTAGAGAAGGCACACAATAGGCTTTCCACTAATATTTGTGAATGAATGAATGAACAGAGAGAGGAGTTTTCTTTCCACAGTTTCCTTCTACCTGCTACTCCTTGAGCATATGAGGCT	312	chr8	129060274	129060585	+	PVT1	none	2.34334	11.7346	8.98007e-05	2.01217	2.93637	0	2.89748	3.44711	2.64467	2.26872	1.66751	2.88486	12.3104	23.4389	25.8939	11.7085	6.99758	9.44743	16.5503	8.70274	6.61691	2.20494	4.57039	26.7366	8.08727	13.6266	3.15318	7.70859
15057	CTTCAAATGAATGTGAGCCAACGTTGGCCCTGTTGGGTGTGCAAGGAGTTCTTGCAGAGTTGATGGAGACCCTGTTTCGAGTCACATGAATAATTAATCTAGGGAAACAGTAGTCAAACAGTCAACTCATTCTTTCTTGCACTCTTGCTGATCCTCAGCAATTTCTCGGCTGCTCCTCCTGCCAGAGTCCTGTTTTGTACCTTGTAAA	208	chr8	129024790	129024997	+	PVT1	none	2.26774	10.8384	0.00045618	1.9031	0	2.41537	0	6.89423	4.40779	0	2.50127	1.92324	5.68174	17.3902	18.6436	3.51254	13.9952	9.44743	21.7768	9.42796	14.1791	5.51236	4.57039	22.559	3.03273	8.38559	6.30636	8.99335
25142	ACATGGGCAGAGTCATTTCTAGACTTGCTAGGAAAGGCCAAGCCAGGCTTGGACCTGGGTCTCTACTGTACTCTTTACTCTACTCAGTCTTTTCCAAGGTGGAAATAATATTTTCTCTGAGGCTGATGTTTTTCTGTTTGTTTTGCATTTTGGTAAATTCATCAACATCAATATCCCCTTTAATGCTCACAAATGCCCTTAGAAC	205	chr8	129024464	129024668	+	PVT1	none	4.99559	17.3757	0.0005094	1.61843	2.93637	3.62305	5.79496	5.17067	7.05246	3.7812	5.8363	5.76973	4.73478	24.9511	29.0012	10.5376	12.8289	8.0978	30.4875	26.1082	13.2338	16.5371	7.31263	50.9666	10.1091	12.5784	10.2478	10.2781
51966	GACTTGTTCAACTTGACACAGTCCTGTGGTCATAGCGAATCTTTCTAAAGCTCTGATCAGTCAAGAAGGGGGTTGTATCAATCCTCAGAACCCTGAGTGGAACTTTCTACAGGATTTATTAGGAGAAAAACCTTCCCGGAAGCTGCAGAAGGACAAATACAGAATCCGTGTCTGGGAGAAACCTCGTGGCCTGGTCTCCATTATTTG	207	chr8	128808028	128808234	+	PVT1	none	4.5312	14.8656	0.00060437	1.51359	0	0	4.82914	8.61778	6.17091	2.26872	6.67005	7.69297	17.0452	9.82923	18.6436	8.19593	16.3277	21.5941	14.8082	11.6036	6.61691	6.61483	19.1956	34.2562	12.1309	12.5784	18.1308	10.2781
97655	TCATCAGAACAGACCATACTAGCACCTTGATCTTGCACTTGTAGTCTTCAGAACTGTAAGAAAATGAATTTTCTATTATTTAAGCCACCCAGTCTGGTGCAGTCTATTATTGCCTTCCAAATGGAGAAATACAAGGAAACTAGGGCCGTCTTAGCTTCACAGAGAGAAGATGTGGAGAGGAGTTAGGAGGTAGAGACTGGACCTTGATGGTGGTGATATTC	221	chr8	129023767	129023987	+	PVT1	none	6.08494	18.5493	0.00557339	1.4394	4.40455	7.24611	5.79496	4.30889	11.4603	3.02496	6.67005	5.76973	8.52261	31.756	34.1799	3.51254	22.159	9.44743	26.1321	23.2073	11.3433	12.1272	4.57039	60.9928	13.1418	14.6748	9.45954	11.5629
32303	TACATTGGGCAGCAGTTTATAGTGTTCTTGGCCAATCTGCATAAAAGCCACTTGAGGAGGTTTGATTAAGAAAATTGTGTTTATCTCCTGTATTACCTCTGTGTTTGATTTATTCTTTAGTCTCAAATTTATTTTCTGAGTGGACTGATTTTCTATATGAACTGAAATGATGTTTTAATAGAATAATAGGTATTTTTAGAGGAAAAGTATTTTT	214	chr17	67547694	67547907	+	RP1-193H18.2	none	14.5595	35.9207	0.00836364	1.1908	4.40455	18.1153	15.4532	17.2356	23.8021	17.3935	13.3401	6.73135	54.9235	29.4877	16.5721	16.3919	71.1421	36.4401	43.5535	28.2839	39.7015	40.7914	89.5797	22.559	21.2291	14.6748	37.8382	11.5629
122023	CTTTCAGATAACTTTATTTACCTTTTCCTTTGCCAAGCATACAACATTAGATTTGAAATATGCTTTGTATCAAGTGGAAGTGTCTCTTAAGATAGCCCCTAGAACAACACATCAAGAGGCCCACCAAAGAGGACCAGAGAAAGGTGACTGAAGGAGCCATACTCAGGCAGGGAAATACGGAGAGAAAGCAGAGGAATTGGCTCCTAATGCTTCACTGTAC	220	chr1	40931310	40931529	+	RP1-228H13.5	none	2.26645	8.55416	0.00175151	1.66318	0	4.83074	2.89748	1.72356	3.52623	2.26872	0	2.88486	10.4165	6.04876	7.25029	4.68339	4.66505	10.7971	9.58177	7.97751	5.67164	20.947	10.0549	8.35517	16.1745	2.0964	3.15318	8.99335
121135	GAATTAAACATGAGTTTCTTCAACAGGTAATTGGTAGAATAGTTTTTGTATCCTTATAATGGAAAAATTTTAAGATATTAAAAGATAAGTTAGTTTGCATGTATTTACCTGAAGCTATGTCTGCACCTATATGCAAAATAGGAGTTTGCAAAATAATATACATGATATCATTCACTTCATACAGAGTATTGGTTAACACGTTAAAGAATTTTCTGTGTGGGACCAAGTTAAGGAATTTACATGCATTGG	249	chr5	34172736	34172984	-	RP11-1023L17.1	none	11.5979	40.5141	0.000426678	1.61966	5.87273	4.83074	18.3507	21.5445	14.1049	11.3436	10.0051	6.73135	29.3557	49.1462	142.934	32.7837	27.9903	40.489	42.6824	22.4821	65.2238	4.40989	29.2505	44.2824	33.36	17.8194	33.8967	32.1191
123168	AGGAAAAAATGCATTTTATAAGTTGTTTGCTTTGTGTAGTGCATCTTGTTAACCGTAGGACTACTGTTGCATTGAAACAAAATAGAATTAATCTGTTCAGGTAAATAGAACTGGAAGTGAGATTTGTTGTCACTCCTTCTCCTTCAAGTACTGACCAGTCTTTTAATTCACACATAACTAACACTCTGTGCAATAATATTTTTTTGTTCTCTGTCTTTTCAAATAGAACT	230	chr5	34220052	34220279	-	RP11-1023L17.1	none	1.97864	10.2286	0.000803489	1.95221	0	2.41537	2.89748	3.44711	2.64467	0	2.50127	1.92324	6.6287	10.5853	18.6436	3.51254	16.3277	8.0978	12.195	2.90091	34.0298	2.20494	10.9689	7.51966	10.1091	13.6266	6.30636	0
7926	TGCTTAATGAAAATATCTCGGTGGAAACCCTGAACTCTAAAACTACCCTGTGGTATTCAGAATGAGTCAAGCAAAGCCCATAATAAATGACTTTATAGGTAGCTTTTGGATACAGCTCTAGGTTTAAAATTTGAGAATAAGGTTGGCAGATTCTATTCTTTACAAAGGAAGGGCTGTCACAGCAGTGTGTGCCTGGAACCCATTTTAAATAAAGGAAAAATTGAAGAGCTGGCATTTTAACCATCATATGTCTAATACATAATGATGCTTCATAAGTTATTGAGACCTCCCTCAATCTCTGGGATAGTTGGAGCAATGGCTGAA	324	chr5	34171020	34171343	-	RP11-1023L17.1	none	9.0791	34.3237	0.00142557	1.67405	0	14.4922	10.6241	13.7885	9.69714	4.53744	10.8388	8.65459	16.0983	40.073	168.828	25.7587	18.6602	26.9927	20.0346	21.7568	42.5373	11.0247	35.6491	52.6376	17.1855	20.964	18.1308	12.8476
2901	CTCGATCTCTGGGATAGTTGGAGTAATGGCTGAATATAAACTATCAGAAAAATTGAATCTGTAATTCTGTCAATAAGTGAGAAAATATTCTAAGATTCTTTAAATTTTAATTCTGGGTTTTTGAACACATTGATGTGTAAAATATAACAAAATAAGGTGGACACTGTTTAACTGCAGTTGGTATCAATTCTTGTGTACTGAATTTAAGGAGAGAGATGTTATCACCGTAGGAAATTATACCAACTAATGACTGCATACCATTAATATATTTTCTGAAGTTTGAATTTTCAGTTAATGCACTTTCA	305	chr5	34170749	34171053	-	RP11-1023L17.1	none	18.1688	55.8224	0.0034577	1.44921	13.2136	10.8692	17.3849	31.8858	21.1574	18.906	17.5089	14.4243	30.3026	70.3168	248.581	55.0298	52.4819	29.6919	42.6824	21.0316	64.2786	13.2297	47.5321	83.5517	43.4691	20.964	52.0275	17.9867
72406	TGACACTGCCCTAGCAGAGGTTATCCATGAGGGCCCCCCGCTCCCGTGCACAGCAAACTTTTGCCTGGATTTCCAGGCATTTTCATACATCTTCTGAAATCTAGGCGGAGGTTCATGAACGTTAATTCTTCGGTGCATCTGCAGGCTTAACACCACCTAGAACCTGAAAGGCTTGGAACTTGCACCCTCTGAAGCCATGGCCTGAGGTGTACCTTGGCCCCTTTTACCTGTGGCAGGAGCA	241	chr5	34188145	34188383	-	RP11-1023L17.1	none	3.42315	15.1263	0.00752708	1.73206	2.93637	2.41537	2.89748	6.03245	0	6.04992	4.16878	2.88486	6.6287	18.1463	98.3968	3.51254	6.99758	4.0489	10.4528	21.7568	11.3433	5.51236	19.1956	10.0262	3.03273	3.1446	13.401	6.42382
4286	TTTTCTTCCCAGTCTCAGGTATGTCTTTATAAGCAGCATGAAAATGGACTAATATGATGAGTTATTTGTTAACAACAACAACAAAAACAAATAGGACTTTGTTATTATAACAGTTGCCCAACTTTTAGCTCCTTTGACAAAACATGTTAATAATGAAATATAAAATGAAGTGAAATGTTTAATTAATCTCATGAATTTGCCTCCTTTAAAAAATATGTGAATATACCTACACACACTATGGGAATTTTCAAAGCCTTCCTAAAGCAGTGACATTTATCAGAATAAAAGTAATCATTAAAGAAAATATGGAAGATGTTCTTAATGATCTCTGCCTGAGATATTTTTAAACATTTATAAAATTATTGGTTTTAGTAAAAATTGAGGGGAGACAAGGATTTA…	568	chr5	34120898	34121465	-	RP11-1084J3.4	none	3.04925	22.0071	1.87689e-06	2.43107	2.93637	0	2.89748	4.30889	5.28935	4.53744	2.50127	1.92324	16.0983	37.0486	73.5387	17.5627	23.3253	10.7971	19.1635	9.42796	45.3731	9.92224	13.7112	38.4338	13.1418	5.241	14.1893	5.13906
108327	AATATTCAGAACATGCATAAACAAAGTTGTGTAGAAGCCAGAGAATACTTAAGAAATGCTAAAACTTTAGGGTCATTGGGTCAGCAATTGACATCCCTTTAAGCTGGACTTTGTGGCTCTTTTTCTTCTGTGCTTGAGATGTATCCACTCAGGTTGTTTTGAAATTATTCCTGGTTTTTATGGCAAAGGACCCTTTTAGGAAAGTTGTTCTCTGTGGTATTCTCTTGATCTTCTTGGACAGGCACAATTAACCTTCCATTTTCGCTTTGAAAAGCTAATTTTCTTTGTTCTCTGTGTTTATTCGTATATATCTTAAAAGCCAAGAGGTAACTTGAATTATTCTGCAACTCCCAAGACCACTGAGAACTTGCAAGTTCTATCCAAGTCTGTGAATACTTC…	3082	chr5	34093120	34096201	-	RP11-1084J3.4	none	5.7222	30.891	4.9767e-06	2.15871	2.93637	10.8692	6.76079	6.03245	4.40779	6.04992	5.8363	2.88486	17.0452	38.5608	102.54	32.7837	23.3253	5.39853	20.9057	11.6036	62.388	15.4346	27.4223	52.6376	30.3273	15.723	29.1669	8.99335
117558	TATTTTCAAAAATGTAAAGAAAATGTTACATATTTTTAAGAAAACTTAAGATTTTTTTTAATTCCAGGTTTTGACTTTCATGAACAAATGGGTCAGCAAAACTTACAGACATTTGTCACAAATAAATAGTGTACAAAATAATGGATAGATTATAGAACTGTTTTGTAGAACTGATGGGACTCAACAGTGTTTTGTTGTTGTTGTTTAATGTGTTTTATTTTGAAAATCAACAATTTAGTAAAAAGGGCATAGATTAAGGGTCACAAAGTTGTCATTTGGCTTACAGAATTACTCAGGGTTAAAAAAATAATTATTAGCAACATTTAACAACCTGAAGATCTTACATAAGAAGCCAGATGTTCTACTTCTTAAAGTCTGATTTTAAATTAATCATTGCAA…	713	chr5	34076989	34077701	-	RP11-1084J3.4	none	3.5439	24.2273	6.305e-06	2.34617	0	3.62305	2.89748	4.30889	8.81558	4.53744	4.16878	0	18.9391	48.3901	73.5387	22.2461	12.8289	8.0978	24.39	14.5046	45.3731	3.30741	8.2267	36.7628	22.24	9.43379	25.2254	14.1324
94986	GTTTTTAATTTATTCTTCCATGTAAATGGCAGGATTAAATCGCCTTTACTAATTAAGTGTCAAGGCAGATTATTCTGTCTAAACTGAATTGTGGCATGTTAAAGGAAACACTTTAAATATTCATTATAAAATGAGCCATTGGGTCTGCTATATTGGAGATCCACTCTTTTATATAATTCCCTATTGGTTGGATATTTTAATGTAAATATACATTTCTATAGTCATTTAAAAAATGTGTATATTAGGTATGTATGCTGAAGCCATACAGGCATGAATTTGAACCTTGTCTTTGTCACTTACTAGATCACCTTAGCAAATTTGGTTATCTTTTATTTTGTTTCAATATCTGCTAGTTTGCTATAAAAATATGAAATAATTCCACATTTGTACAATAGTATT…	1428	chr5	34082017	34083444	-	RP11-1084J3.4	none	1.7969	16.0626	8.24926e-06	2.5221	0	0	1.93165	1.72356	3.52623	3.02496	4.16878	0	9.46957	21.1707	46.609	22.2461	6.99758	12.1467	20.9057	5.80182	41.592	0	10.9689	18.3814	16.1745	6.28919	11.8244	6.42382
56499	GGAAAAATGTCATTTAGAATTTTGGATTCAAAATTGGAACTTTGCTTCTTTAAGAAATGTTTCTTTACTTGAACATAAATAGATGTTCAGTTTATTTCTTTGCAAATGCATTATTATTATAATAGAATCACACTAGTGTATTTCCTGGGTATACGGTAAGTTTTGTCAATAATTTCATTATTGGAAGTTCATTTTTTTATAGTCATAAAAGGATAATAATAACATACCCATTCTGTTTTAGGCACTGCGCCTACTGTATATAAGTAAATCTTCCTCATCTTTATAACCAATCACAGAGCGTTTTTACCAACCTTGTTCAAAGATTCGAAGACTGTAGCATAGAGAGTTTAGGCAGCTTCCCCACAATCACAAAAGGAAAGAGGCAGGTTGAGGATTTGA…	1193	chr5	34080338	34081530	-	RP11-1084J3.4	none	9.16358	37.0371	1.38391e-05	1.84021	8.8091	6.03842	14.4874	8.61778	8.81558	11.3436	7.50381	7.69297	15.1513	46.8779	123.255	18.7336	30.3229	28.3423	33.9717	20.3064	57.6617	9.92224	29.2505	51.8021	42.4582	16.7712	43.3562	24.4105
28507	AAACAAATCAAATTTGCTAAGTGAAAATAAAATTCAAATTATTTAATAATATTAGTATTCTGTGTTATTAGAATAAAGAAAAAACTTATGTGTGTAAACAATGTATAAATAATGAAGAGAAAAATAAGCTAAAATCAGACGAAATGAGATGTCATGCTTCCCATTACAATGGCGTATTTAAAAAGGTAATATTCGTTATCTTTGAGGAAACACTGAGATTTTCTGATAGGTTGTTTTTGTGTGAGTAAACATTGTTACATTAGATTTTTAGAAATCAATTTTACTGTATAGCAAGGGCTTTCTATTTATTTCACATCTAGGAATCTCCTTTGAAATAGACCTCATTGACCATGTTCATGACAGACCAATTATATTAAAGAAAAATGGAAAATTTCCCAA…	947	chr5	34101540	34102486	-	RP11-1084J3.4	none	1.77341	13.242	1.99969e-05	2.36256	0	0	1.93165	1.72356	2.64467	0	5.00254	2.88486	5.68174	11.3414	51.7878	10.5376	5.83132	8.0978	12.195	8.70274	32.1393	5.51236	10.9689	13.3683	17.1855	6.28919	7.09465	5.13906
72634	GAACACAACATAGGATCTACACTTTTAGCAAATTTTTAAGTATATAAAAAGTATTGTTAACTACAAGCAATATGCTAAACAGTAGAACTCTAGGACTTATTCATCTTGTTTATAACTTTGTACCCTTTGACTGGCACCTCCCCATTTCCTTCTCCCTGAGTCCCTGGCTACTGCCTTTTACTCTCTGCTTCTATGATTTTGACTCAGACTTATCATATAATTGGTATTGTGTAGATTTTGTCTGTCTGTGTCTGGCTTATTTCACCAGCATAATGTCCTCCAAGTTCATCCGTGTTATCTCAAATGGCAGGATTTACTTATTTTTTAACGCTGAAGAATATTTTATTGTATGCATATACCATGTTTTTTAATCCATTCATTTGATAAACATTTAATCTG…	1208	chr5	34078827	34080034	-	RP11-1084J3.4	none	3.56183	19.7083	2.26604e-05	2.12171	2.93637	0	2.89748	3.44711	1.76312	6.80616	5.8363	4.80811	9.46957	30.2438	59.0381	21.0753	15.1614	8.0978	13.0661	8.70274	45.3731	2.20494	20.1097	20.8879	10.1091	11.5302	19.7074	20.5562
6740	GGCATGTCTCACATGGCGTTAGACAAAAGAAGAGAACTTGTTCACGGAAACACCTCTTTATAAAACCATCAGATCTTATGAGACTTGTTCACTATCATGAGAACAGCATGGGAAAGACCCACCCCTATGATTCAATTACCTCCTAACAGTTCCCTCCCACAACACGTGGGAACTGTGGGAGCTATAGTTCAAGATGAGATTTGAGTGGAGACACAACCAAATCATACCAGGTATTAAGTAAGTAAATATGGCAT	254	chr5	34120579	34120832	-	RP11-1084J3.4	none	7.33244	30.6748	2.57602e-05	1.86303	5.87273	4.83074	7.72662	12.9267	9.69714	5.29368	7.50381	4.80811	15.1513	36.2926	105.647	23.417	19.8265	20.2445	32.2296	13.7793	54.8258	12.1272	15.5393	41.7759	28.3055	15.723	41.7796	14.1324
17254	TATATGTTAATAAGCCCATTTTGTTGATGCAAAAATTGAACCGCAAGTATTTTAAGCCATTTGCTAAAGTTAACAAATTCACTGCTGTAGTCTGAATGTGTCCCCAAAATTTCATGTATTTAAACTTAATCTCCAATGCAATAGTTTCAAGAGAGGAACTTTAAGAGGTGATTGGGTCGTTAGAACTTCTCTCCTTTGAATGAGTTAAGTCCTTCATGATAAAGGCTTCATAGAGCATTTGGCCTTTTGCCTTTTCTGTCTCTTCTACCACATGAAGATACAATGTTTGTTTGTCCCCTCTGGAGGACACATGAACAAAATGCTATCTTGGAAGCAGAGAGACAGGGCCCTCACCAGACACTGAACCTGTCGGTGGTTGGACATTGGACTTCCCAGCCT…	1003	chr5	34099567	34100569	-	RP11-1084J3.4	none	3.48579	18.7916	3.42791e-05	2.11199	2.93637	4.83074	2.89748	7.756	2.64467	2.26872	1.66751	2.88486	15.1513	17.3902	63.1811	22.2461	13.9952	6.74817	11.3239	6.52705	38.7562	2.20494	18.2816	30.0786	24.2618	7.33739	14.1893	8.99335
54515	CAGCCATGATTGTAAGTTTCCTGAGGCCTCCCAAGACATGTGGAACTGTGAATCAATTAAACCTCCTTTGTTTTCAAATGACCCAGTCTCAGTGTCTTTACAGCAGTGGGAAAATTTACTAACACAAGTGGATTATCACTGCTGGGTATCCGGTGGAGGCAAATGAACAGGGGAACGACTGGGCCTTGGTCAAACCAAATAAAAACAAAATTCATGTTATAGCAGCTCATGCATTAGCAGCACGCCCCAATAAAATGGCAGGGGATGGGGTCCCACCAATTCACATCACAGACATCAACCAGGGCACATTGGGTAAGCAGGCAACCAATTCTGTCACATAAAGCATTTATCTTTACATTAGGTATAGCTTTAACATTCCGACTAAATAAAAAAAATAAG…	771	chr5	34077762	34078530	-	RP11-1084J3.4	none	1.72763	10.0223	3.60809e-05	2.18817	2.93637	0	3.86331	0	1.76312	0	3.33503	1.92324	10.4165	16.6341	25.8939	15.221	6.99758	9.44743	6.96856	3.62614	12.2886	3.30741	9.14078	13.3683	9.09818	3.1446	7.09465	7.70859
111860	ATAAACTCTATGTAGTACATAATGGTACATTTAACAATATAGAATTTTTTGAGGTTTCTAAAAATCAATTCAATACTGCTATTTGCAAATCTTTTTATGGCATAAACTCTACCCATGAAGTAAGTAATTGCTAACTAGTTATTCAGACAATTTAATAAAAACTGCATAGTATGTTGAGGTATTTATTATATTAAATATGTCATAGTTTTATAAGTTTTATGTTAAGAGAATTTACTCTCTGCCCCCAAAAAGCCATTTTTTGTAACATAAAGCAAAACTAAAATTATTTTAAGTTTATTTATGGC	305	chr5	34070437	34070741	-	RP11-1084J3.4	none	2.84194	14.6728	4.23806e-05	2.0265	0	0	5.79496	6.89423	1.76312	3.02496	3.33503	1.92324	10.4165	26.4633	35.2157	9.36678	8.16385	4.0489	15.6793	13.0541	29.3035	3.30741	8.2267	18.3814	14.1527	8.38559	12.6127	17.9867
20474	TTTCTATTTCTGATTGTGAATATGCTACCTATTCACTTTTGCTTACCTATGTCTGTATGAATATCTACCAATGATATAACCTCACACATTTCAAATTATTTAAGGTAAAGATTTGATTTTGCTTTCGTTCTCATCGTAATGTATCCATTCCCTTTATTTGAGAATGTTTCTCATTTAATAATCTCAGTATTTTAAACTATTACTTAACAAAATATGAGAGAAATGTCATGTCATAGTTAACTGAGGTCAGTGGACAGATTTTCTTTCTCTCTATAGCCATTCATTAATTTGTTTATTCATCAAATGTTTATGTAGCCCCTATTATGCAACATTCATTTTTGTGACAGAGGGGATAGTATAGCACAAAAAGTAGAAATATCTGCCTTCAGTGACCATCTA…	660	chr5	34069232	34069891	-	RP11-1084J3.4	none	4.38246	20.7102	4.64812e-05	1.94349	0	0	6.76079	12.0649	3.52623	3.02496	5.8363	3.84649	12.3104	27.9755	60.0738	31.6129	15.1614	13.4963	18.2925	15.2298	27.4129	8.81977	12.7971	38.4338	17.1855	8.38559	12.6127	11.5629
65855	ACACAGGCCCAGATCAAGTCCAACACCAACAGGGCAAAATATATCAAATTGTAAGGGCTGCAGCTCTCCAGTGCTGAAATCTGGGTTCATGGAGGCAGCCTTGCCCCCATGGCTCTGCTGGCATTACCTTAGTTGGTGCTCTCTGTGATAGCCTGTCCCCATGGCAGTTCTCTGAGGTGGGCCCATCCCTGTGGGTTCTCTGCCTGGACCTTCTAGCTCTCTCAGGGCATCCTTTGAAATCTAGTCACATCCCCTCTGCTTTCCTGGGTGAAATACACACTTCGCTAAGGCTGCTGATTTCACTGGTGGGGTGACTGAGGAGGAGAACTGCAGAGTGCGGGGAGTGGAGACTGCAATGTGAGGAGGCTGTTATAATCAGTGGTGGTCTCTCTTTTGATA…	530	chr5	34122903	34123432	-	RP11-1084J3.4	none	2.29781	12.7412	5.33655e-05	2.06141	0	0	2.89748	5.17067	1.76312	6.04992	2.50127	0	4.73478	17.3902	33.1442	10.5376	6.99758	5.39853	13.9371	6.52705	17.9602	4.40989	9.14078	20.8879	11.12	7.33739	18.9191	15.4172
102111	GTCATTTCCTATTTATTATAGTAGGTGTATGATTTAATGTAATTCTTCCTCCTCTTATGCTATCAAATTGAAGACTCATAATTCACATTGGGTTAAATAATGCTTAATATATCATCTCTATTCTTTTTCTTTCCATGTACTTCAACTCTGTTAATACTCAGTTCTACTAGACTCAAATATAATACATCATTAAGCTCATGAATGACCAGAAAATATAAATTGCAGTATTTCCCGGTAGGATCTTTATTTTTAACTCTTGTGAATTATATTTGCCTCTTTATTTCCTAGACACTAGTTTTGATGGTAGACTAGATATAACTCTAATTATTCCAGAGAACTAAACAGGGTCAGCTATAATTCCTTAGAATACCAAACATGAGTATTTTTTCATCCATGCAT…	504	chr5	34075193	34075696	-	RP11-1084J3.4	none	4.65817	23.0697	5.59942e-05	2.00639	2.93637	0	5.79496	3.44711	8.81558	4.53744	5.00254	6.73135	13.2574	37.0486	64.2169	23.417	20.9927	10.7971	16.5503	12.3289	41.592	2.20494	24.6801	41.7759	20.2182	8.38559	25.2254	6.42382
59722	GATCATTCTGCAAAATAATAAGATGACTTTCAGAAAAGAAAGGTTTAAAGGACTTTTTGCTTTTATGTTTAATAGTTTCATATAGCTTGGCTCATTAAGCACTAGGTATTTTCTAAATGATCATTAAAATTAAAAAAAATTAATTGTGGTAAAATACACCTAAAATAAAACTTACCATTTCATCATTTTTAAGTGTACAGTTTGGTAGTATTAAGTACATTCACATTGTTGTGTGAGCATCACCGTCATTAATCTCTAGGGCTCTTCTTGCAAAATGAAACACTATACCTATTAAACAGCAACCCCATACAATTCTCTACTGCATACGGTCACTGACAGCCAACTTTCTACTTTCTGTCTGTATGATTCTGATGACTCTAGCTACCTCATACATGTGTA…	688	chr5	34075854	34076545	-	RP11-1084J3.4	none	1.49038	12.7314	5.70469e-05	2.45729	4.40455	0	0	1.72356	3.52623	2.26872	0	0	6.6287	15.878	56.9666	10.5376	9.33011	2.69927	8.7107	7.25228	23.6318	2.20494	9.14078	18.3814	11.12	2.0964	16.5542	2.56953
119231	TTCATGCAGATGTGGTGAGGGAGAATGTATTACAAGAACAAATTTTTTCAGAGAGAAAGCCAGGACCGCAGAGGATAGAGGACAGGAAATTCTTTTCAATAAGCAGCGATCAGTTTTAAGCAAGAAACTTTCTCCACTGGTAGAGCAGAGAGTCTCTGCAATTTTTGTCCTGCAAAATTTTATTGCTCTGAGCAGTGACTGCGTGGTCATTCTTTTTTTTCTCAAATGAGACATTTTATTGTAATTTTAAGTAATATATAGTTGCTATTAATGATACGTAGGAAACTTTTGTGATAGAGAGGACTGTACCCAAATATCCTGACATCTGAACTGTATACCATGCCTGAGTGTAACTATGGCTTGTCTTTCTTGGGAAGTGGGTAGACATGTTCTAACTTG…	1298	chr5	34109612	34110906	-	RP11-1084J3.4	none	8.70611	34.8398	6.18898e-05	1.8044	10.2773	2.41537	9.65827	11.2031	10.5787	7.5624	8.33757	9.61621	17.9922	39.3169	124.291	36.2963	26.8241	17.5452	30.4875	16.6802	74.6766	12.1272	18.2816	50.9666	23.2509	20.964	32.3201	15.4172
18575	ATGGCTCAAATTATGACTGGTTGAGTGGAGTAGATTGGCAGGACTGCCCTTCTCCACGTGGTTATTCAGGGATTCATACTGACAGAAGTGGCCGGAAAATTAGTCTGGTGCTCATGTCTTTTTCACTCCAACGAGATAGAAGAAGAAATGAGTGCAAGTGAGAGGTTATGAACAAGGTCTTGAAGTGGAGTTCATAATTTGGGATGACTGTGGCTGGAATGTAGGCTAGCTGTGTATCCAATAAGAACAGGAGATCATACATTTTGGATAGTAGCCACCAGTCTCTTTCACAAGTACTTTCT	302	chr5	34070140	34070441	-	RP11-1084J3.4	none	4.7281	22.2895	8.11735e-05	1.93718	0	3.62305	6.76079	6.89423	8.81558	7.5624	4.16878	0	12.3104	44.6096	67.3241	21.0753	19.8265	9.44743	19.1635	7.97751	38.7562	8.81977	19.1956	25.0655	21.2291	13.6266	20.4957	7.70859
24184	TTCCTATTGCTGCTGTAACAAAATGCCACAAACTTTGTGGCTTAAAACAGCACACATTAATTCTCTTAGGAAAAAAATTAGAGTTCTGGAGGTTGGAGTTTAAAAATCAAAGTGTTGGTTGGATTGAGTTACTCTTGGAGGCTTGTGGAGTAATCCATTTCCTTGCCTTTTCCAGCTTCTAGGGACTGCTTGAATTCCTTGACTCACAGTGCCTCACACCAACCTCTGGTTCTATTGAAACTTTGTCCGGCCTCCTCCCAACCTGCCGTCTCAACCTCTAGTTTCCCTCTTATAAGGACCTTTGTAATTGTGATTACATCACACTCACCTGGATAATTCAGGAAAATCTCATCATCTCAAGATCCTTAACACAATAAAATCTGCAAATTCCCTTTTACC…	716	chr5	34108743	34109458	-	RP11-1084J3.4	none	5.99353	28.1011	9.2797e-05	1.94443	4.40455	3.62305	2.89748	12.0649	5.28935	8.31864	7.50381	3.84649	17.0452	34.7804	106.683	29.2712	11.6626	9.44743	20.9057	12.3289	54.8258	5.51236	25.5942	48.46	24.2618	13.6266	23.6488	11.5629
122844	GAGAAAATCAAGAGAGAAAAGTGTGACATGAAAGTAAATGGGACCTGGTGTCTTTAATAGAGTTACTGCTGCCATACCTCTGGGGAAATACTCTGGAAGCAAGAGTAAACTGATAAATCTAATAAGTTACTTGCTGGAATCCTGCTTTCATACCTGAAATATACAAACTTCATTGAAAAACCCAGTAGTCATCATAACAGAACAAAGTAGTTAATTTCACAAAAATACAGCCCTTCAGATCAATGAGAACTAATGCAATTCACACATTTAATAAGATTACTTTTTAAATTATATGGTTTCATAAGCTGAAGATTCTGAAAATCACAGGATATGGGATAAAGTGTTTAATAAGTATAATTTGGAGATTAATTTTCAGCTAAAGAGAGGTTAAATATATTG…	935	chr5	34092001	34092936	-	RP11-1084J3.4	none	4.14531	22.8923	0.000108077	2.08644	0	4.83074	7.72662	6.89423	9.69714	1.51248	2.50127	0	9.46957	30.2438	52.8236	31.6129	22.159	5.39853	17.4214	7.97751	62.388	4.40989	17.3675	42.6114	23.2509	14.6748	14.1893	10.2781
71547	TGCAATTAAGAAGCTTCGCCCTTATGTAGGGCTGCTGGTGGCCCAGTCACACACCTCTTTCTAGGGAGAAAAAAGACAGGGAGACTATATCTTTACTCTGGAATGTAAGCATATTTTCTCCAGGAATTGGATAGAGATACGTTTATCTTTATTGCTCTAGAACAGCTCAAAACAGTGAGATATTTCTAAACTTTACTCTCAGCGAATGTCTCAATATACAAACTTTCCTAATTTGTCTGTAATTATCTTTGCTCAGAAAAACTCGATTTCAGACATATAGAGATCCGGGGAGAATTGTCACAACATTCCCACTAAAATAGCCACCTTCACAAATAAATATTTTGTCTGAACATCAC	356	chr5	34084306	34084661	-	RP11-1084J3.4	none	3.99518	20.0637	0.000116679	1.99684	0	3.62305	4.82914	6.89423	4.40779	2.26872	4.16878	5.76973	3.78783	38.5608	68.3599	12.8793	16.3277	14.846	11.3239	11.6036	37.8109	3.30741	18.2816	27.5721	24.2618	7.33739	15.7659	8.99335
100684	TTTGTCTTCCTTAAGACTTAAAATACTGAAATATAGTACTTTATGACGAGAAAATACTAGACAGCTCTTAAATAAAATTCTGTTGTCCGTGTACTTTTAAAAAATATTGTGATACTGCAAAATATAAGTGTCTCCTTTTACCAATTTTCTGAAGATAGAAGGTTGTTTAAGAACCATGCTATTCTGGCAAAAGAACACCTAAGGTGGACTTGGATTTTCAGCACGGGGAGAGCACAATAAATAAGAGTGTACTTAATCTTGCTTTTTACTGGAAACACATATTGGAAACAAAGCCATTTCATAGTCTATGTGTATAGAAGAATACTCTTGACTCCAAAGAACTTCACTTGTATGTGGAACTCCAAGAGAGTCAATAATAAAATCAATAATAATTATAAA…	1013	chr5	34107717	34108729	-	RP11-1084J3.4	none	8.46359	32.0973	0.000118537	1.73024	2.93637	8.45379	8.69244	11.2031	12.3418	5.29368	9.17132	9.61621	24.6209	44.6096	96.3253	19.9044	29.1566	20.2445	23.5189	14.5046	69.0049	8.81977	23.766	48.46	44.48	17.8194	14.1893	14.1324
10752	CAGTGAGCTGTGATTGCACCACTACACTCCGCTCCAGCCTGGGAGACAGAGCAAGACTTTCTCTCTAAAAAGTAGAAAACATAAAAATAAAAAAAAACACACACAAATAATTTAAAAATTAAAAGTTCATTATTCTAACAAAGGTGGGATTCTGGAAGGATAACAACAGCAAAACCCAGCAAAACACAGGAATAGAAAGTCAACTGAAAAAATTTTAATTGTCCCTATATGTTTTTTAGAGTTTCATGCCACTAAATGCAGAAATATTCAATTCAACCAGCATTTAACATATTTCAAAAATAAAATGGAAATCATATGCCACTGTGATTGTCGAGATAAAAACTGATTGTCCAGAGAACATTGAGAGAGTATGTTGAGGCATTTTGTTTTATTTTTTTA…	420	chr5	34103065	34103484	-	RP11-1084J3.4	none	4.56944	21.6785	0.000121905	1.93712	0	4.83074	2.89748	10.3413	7.93402	5.29368	3.33503	1.92324	11.3635	25.7072	69.3957	11.7085	13.9952	12.1467	18.2925	8.70274	52.9353	6.61483	10.0549	40.1048	21.2291	13.6266	18.1308	12.8476
95697	GCATGCTAACTAGTTTTCTGATTCTTTTTTTCTGTTTAAAATTACATATATTTTGAAATTTGAAACCTTTTAATGTATGTACAGGTTTAAATTGAATGCAGACAAACAATTACATGAATAATAAGTCTATTTTAGAAATCCAAATATACACTTTCAAATAGCCTACAATTCCTCCAGCTTTCCAACAGTCTCAAGACACCTTTTTTTCTTGTATAATTTATGCT	224	chr5	34074974	34075197	-	RP11-1084J3.4	none	4.28268	21.2823	0.000124777	1.98445	0	3.62305	5.79496	4.30889	8.81558	4.53744	3.33503	3.84649	9.46957	33.2682	74.5744	15.221	18.6602	10.7971	10.4528	10.8784	37.8109	2.20494	23.766	31.7497	12.1309	5.241	27.5903	16.7019
73245	CAAATATTGATGACCTATAAATATTCTATACTGGATATTTTGTTGGAAAAAGTGATGAAATTAAGACACAGGGCACAATGATGTGTTAGAAGAGAGATGGCTGAGAAGTCATGAAATAATATTTTACGTTGCTCACAAAGTGCAGAAATTTATTACTATAGAATTTGTTTAGTCAAGTGTACATATTAAAACTTTAAGTATAAAACTGAGCATTTGAAATAAAGTGTGCAATTGAGCAAAAAGGAAAAGCAAAATGGTAAAACAAAAAAAAAGTAAAATGATCTGTCAAAATAAGATAGAATGTGAGTTCATCTCTGTGGATATAAAATAACTATATGAAATATAGGCTTTACACAGGAAAATATAAGTCCCAGAAAAATTTAAAGGACATAGATGTCT…	1359	chr5	34113637	34114995	-	RP11-1084J3.4	none	3.91088	18.6305	0.000136225	1.95274	2.93637	4.83074	1.93165	6.03245	6.17091	6.04992	3.33503	0	8.52261	28.7316	55.9308	25.7587	9.33011	4.0489	15.6793	13.0541	38.7562	8.81977	21.9379	26.7366	7.07637	6.28919	19.7074	7.70859
63619	CTTAACAGTAAACAGGTGTTAATCCGAAACTTTGTCCATGAACTTTTTCATTTATGAATTTATTGTATCTAAATGCCAAGATGATTTTTTTTTGAGTTACATAATCTTACTTCATGGAATTGTAGCAAAATCGCAGCTTGGAGATATAGTATGTGGTTTCATAATGTTCGTTCTCCTACTTCCAGGCATAAGATAAGCTGGCAGTTACTTTCCCCTTGAAGATAGGCAGAGTGAAATGACTAAAACTGACCAACAAAATGATGGACAGAATCTATAAGGGCCAGTGCATATTTTAATTTACTGTTTATCTCCTGCCCTTGTAGCAAACAACATGAAGTAGACACCCAGCTGTTTCAGAGTAGCCAGTGCATACTTAATTTTGAAAGAAATATTTTATTG…	858	chr5	34086637	34087494	-	RP11-1084J3.4	none	4.18138	19.4603	0.00013825	1.93094	2.93637	4.83074	2.89748	8.61778	7.05246	3.7812	3.33503	0	16.0983	32.5121	60.0738	16.3919	13.9952	6.74817	15.6793	7.97751	38.7562	7.7173	15.5393	30.9141	18.1964	3.1446	17.3425	10.2781
6191	TAAAGGAAAGCACATTCCCACATAAAGAGGCGAAGAATGTTGTGTAGGTCACATTTATCTAGAAGAGCTCGAAGCTGATGACAAAGGTTATACAAAGTAGGTGGGGCCGCTCTACAGACTCAGGGTATTTAACCATGGGTCTGCAACAGGTCAGCATGTCAGCTCTTGTAACACTGCTTGTAACGCTCAATGTGCTCATCTATCAAAGCGGGGTA	215	chr5	34091257	34091471	-	RP11-1084J3.4	none	3.17817	16.0216	0.000151039	2.0061	4.40455	0	3.86331	4.30889	3.52623	2.26872	4.16878	2.88486	7.57566	22.6828	52.8236	14.0502	11.6626	9.44743	7.83963	6.52705	38.7562	2.20494	14.6253	31.7497	12.1309	8.38559	9.45954	6.42382
84531	GAACAGATTAATACAGCAAATTGGTACTAGTAGAGTGGGGTGTTGCTTAAAAGATTCTTGAAAATGTGGAAGCAATTTTGGACCTGGGTAACAGATAGAGGGTGAAACAGTTGGGAGGGCTCAGAAGAAGACAAGGAAATCTGGGAAAGTTTGAAACTCCCTAGAGACTTGTTGAATGGCTTTGCCCCAAACTGCTTACAAGGATATGGACAATGAATCCAGGCTGAGATGATATCAGATGGAGATGAGAAACTTGTTGGGAACTGGAGCAAATGTGACTCTTGTTATGTTTTAGCAAAAAGACTGG	307	chr5	34067163	34067468	-	RP11-1084J3.4	none	5.29571	20.838	0.000154822	1.75522	4.40455	0	2.89748	13.7885	6.17091	5.29368	5.00254	4.80811	11.3635	53.6827	49.7163	15.221	19.8265	9.44743	15.6793	12.3289	28.3582	5.51236	22.852	18.3814	18.1964	12.5784	19.7074	20.5562
64088	ACTAATGGTTGCATCTAGCTGTGTCTTCACAACCCATGATGCAAGGGGCAGGGTAGCTCTCTGGGACTTCTTTTATAAGAGCACCAATTCCATTCATACCATTTATGCCCCCATGACCTAATCACTTCTCAAAGGCCTCACATCCTGATACTATATGACCCCATACCTGATACCTTGGGAATCAGAATGTCAGCATATACATTTGGGAGGACACAAACATTTTGATCATAACAAGGTCCTAGAAAAGAAAATTGAAATCACAGAAGTAGATTTGATTATTTAACATTTGCATCTAGATTGCCAACATTTTATTTCTGTTAATGAGTTTGCAAATTCAACTCTGTTAGAGCGATA	354	chr5	34089275	34089628	-	RP11-1084J3.4	none	5.53268	23.4715	0.000173042	1.82857	2.93637	2.41537	4.82914	15.512	6.17091	6.04992	2.50127	3.84649	11.3635	31.756	69.3957	11.7085	11.6626	25.643	20.0346	7.97751	44.4278	14.3321	19.1956	49.2955	23.2509	11.5302	14.9776	8.99335
18203	AAATCCATTTTATCAGTTGGAGAAATTCAAGATTAATGTTGGAGAAACAGTATAAAGCTCTAGTTTTTCAGGCTGTAGAATATAAAATCATCAGACAAAACCTAAAAAGGCAAGATATTAGATGTAAGAAATGTCTTGAAATGAATGTGAAGTGAATTGAAAAGAGCCGTGAATAAAGCAAAAACCACTAGGAATTCAATTTTGTTGGCTATTTCTGACATTCACAAGTAGACGTACCAGAAGAAATAAAATCTAAGAAGAGTTTATCT	269	chr5	34068262	34068530	-	RP11-1084J3.4	none	4.89764	20.0081	0.000178193	1.7821	2.93637	0	6.76079	7.756	5.28935	6.04992	7.50381	2.88486	17.9922	30.9999	54.8951	9.36678	19.8265	14.846	25.261	10.8784	34.0298	2.20494	14.6253	26.7366	10.1091	8.38559	18.1308	21.841
90656	TACACATATATAAACATGTATTATGATTGTAAATGAAATAATGCACAATACTTTATAAAATGTTTTGGAAATGGAAGAGGTTTGTTGTCCTAATGAATGGGAATTACTACCGGCATTTAGTCTCCCTTGGAGACCGAGCAGTTCCCAACATAAAAGAATGTTCTTGAGCACTGCAAAATTAGCAGAATGTCTTTTTGTACATTCATGTAGTTGAAAAATCTATTTATACATAAATCTGCTTTTTAAACAATATAAATATGGTCTGTTTCCTGAAATCATCTAGTTTTCATATACGCTGGATTTTTTTTTTTTT	313	chr5	34083617	34083929	-	RP11-1084J3.4	none	4.69569	20.3393	0.000202412	1.86628	5.87273	3.62305	7.72662	3.44711	7.93402	4.53744	2.50127	1.92324	5.68174	34.7804	63.1811	17.5627	15.1614	10.7971	10.4528	11.6036	50.0995	4.40989	16.4534	32.5852	15.1636	8.38559	14.9776	14.1324
113626	CAAAAATACTATGATATGTTTCAATACTTAGGTGTACTTCCTGAATAATTTTGGAAATATTTTATTATTATATTGCTTCATTAAAGCTAGCATCCTGGGAACTAAATGCATGACTTATCATTATAAATAAACAATTAAATCCGGAAAAACTGCTTCACTAGAGAAAGTTAGGCTCATAAAATATCTTGCAGTTAAATTCCCCTGTTTTTTTTTTCTTTCTACTTTAATTCAAACCTCTGTAAACATTTACCATTGGCATTTGTTAATTGAAATTTAATCTACTTGATAGCTTATTTTGGGGCGATCACCTACATTTTTTATTCTCTATTGATTCAAATTTTTGTTGCCAAAAAATAAATAATTAAGAATCATGTCAATAAGTTAGAAACATTTCATGGA…	437	chr5	34081545	34081981	-	RP11-1084J3.4	none	6.49215	26.9267	0.000209102	1.81989	5.87273	6.03842	13.5216	4.30889	4.40779	2.26872	11.6726	3.84649	16.0983	40.8291	83.8962	32.7837	22.159	18.8949	16.5503	10.8784	55.7711	3.30741	17.3675	30.0786	28.3055	7.33739	26.0137	20.5562
81616	AAAAACAATCTGTTAATCTTTGATTGGCGTATAACTCTGAGACAATTCTCCCCATGTAAATAATGCCTAGGTGTGCTACATTTAGTATATGAAGAAAAGGTAAAGACTCAGTTATAGGGCAGAACACAGGTGGCTCACGCAAGTCATCTCAGCACTGTAGGAGGCCAAGACGGGAGGATTGCTTGAGCCCGGGAGTTCCAGACCCGCCTTGGCAACACAGTGAGACCCAGTTTCATAAACAAACAAACAAACAAAAAAAGCAAAAAAGCA	270	chr5	34088765	34089034	-	RP11-1084J3.4	none	7.65203	29.4462	0.000237661	1.73383	4.40455	3.62305	5.79496	13.7885	7.93402	6.04992	10.0051	9.61621	17.9922	55.1949	67.3241	21.0753	19.8265	9.44743	24.39	18.8559	68.0597	3.30741	19.1956	50.9666	21.2291	22.0122	39.4147	12.8476
27738	TAAAGATACGCATAATGGCAAATATTTGAATACATCCAGGAGCTATTTTGGGGAAGTTAGCAACAGGTCAGAGAGAAGTAGGACTTTCTAAAATCAAATAAATGACAAATTATAGATTAGAGATTAGTCCATACAGTGTGATCTATGTATACAGAGCATAGGAGAGTAGTTGAAGCATAGTCCTTGGAGCCAGATTGATTGGATTCAGGTCAAGCTCCATCATTTATTCAATAATTTTCTTAACCTTGCTGTTCCTCAATCTCTTCATTTGTAATGTATGTATAATAATAGTATCTAACTATTGAAATTCTCATGAGAAAAATTTAATGTTAAAAATGCACAATTTCTTCTCACTGGTATAGTCAACTTGAAAAAATGCAGTTTCTATATATACCTGAC…	1029	chr5	34096811	34097839	-	RP11-1084J3.4	none	5.297	23.7866	0.000238731	1.86719	0	2.41537	5.79496	10.3413	7.05246	5.29368	6.67005	4.80811	10.4165	30.2438	84.932	26.9295	15.1614	8.0978	19.1635	8.70274	48.2089	8.81977	10.0549	28.4076	40.4364	14.6748	17.3425	8.99335
41969	TTTATCTGTTAGTAAATATTTTATAATAAGGGAGCATGTTTCTTTCTGACTTGACATTAAAGTACCTATACATCTGTTAAAAAGTGCTTTGACCTTTAGCAATGTGGTATGATCAACGATATTATAAGCTGATTTAGGTTAGAAAAAAGACACATGGGCTTATCAGTTTTAGAAGTAGACATCTGTGTGCAAAAAAAATGTATTTCTGTATTTCAAGCACAAAATTAAGAACACTTAATTTTTCCTTTGGAAAAAAATTAAACACATACACTCGCATACGTATACCACTCATACACAAACACCTATTTTTTGAAGCTTTGCTTTAAAACATAACATTTTAGAAATAAAATCGTGGATAGAAGGAGACAAGTGTTTAGTATGAAAAAAATTGCAGCATTT…	408	chr5	34123833	34124240	-	RP11-1084J3.4	none	6.15484	27.0923	0.000273601	1.85124	2.93637	0	3.86331	16.3738	4.40779	4.53744	7.50381	9.61621	9.46957	45.3657	94.2538	26.9295	22.159	14.846	17.4214	13.7793	45.3731	4.40989	18.2816	40.1048	24.2618	19.9158	18.9191	17.9867
120513	CTCAGCCTCCCTTGTGGCTAGGTGTGCCATGTGACTAAGTGCTCATGATTGAGATGTAAGTAAATGTGAAATGCAGGACAGCAATACCCCTTATTAAATGTAATTGCCCATAATTCCCTTGTTTTTTACTTTCATCCCAAATGAAAATGGTGATGACCAGGGCAACACTAATAGCTGTGTATCATGGATAACAAAGCCATACCCAATTTGTTGGGTTCTGGACTGATTCATGGAGCATAGAGTTCCTGGGCTCATAATGTAAGCAGAAAACACTCTTCAGTTTTAATAAGAAATCTATATTGTGGGGCTTATTAGCTCTAGCAATGTAGGTTTTACTGTAGCTAATAAATAATTGGTACATTGGAAGGCTTTCTGCCTGCCACAAAAACCTAAAAAAAA…	966	chr5	34111088	34112053	-	RP11-1084J3.4	none	4.96093	24.31	0.000276843	1.94416	0	2.41537	4.82914	9.47956	7.05246	6.80616	3.33503	5.76973	10.4165	42.3413	82.8605	12.8793	11.6626	18.8949	19.1635	10.8784	44.4278	3.30741	16.4534	54.3086	25.2727	8.38559	21.284	6.42382
55142	TGGCTGTGTTCCCACCCAAATCTCATCTTGGATTCCCACATGTTGTAGAAGGGACCCAGTGGGAGGTAATTGAATTATGGAGGTAGGTTTTCCCCATGCCATTCTCATGATAGTAAATGAGTCTCAAGCGATCTGACAGTTTTAAAAATGGAAGTTTCTCTGCCTAAGCCCTCTGTTTGCTACCATCCATGTAAGATGTGTCTTGCTTCTCCTTGCCTTCCAC	223	chr5	34060720	34060942	-	RP11-1084J3.4	none	2.21769	12.1141	0.000278802	2.02976	0	2.41537	1.93165	5.17067	1.76312	4.53744	0	1.92324	4.73478	21.9267	30.0369	4.68339	11.6626	4.0489	10.4528	3.62614	23.6318	2.20494	15.5393	21.7235	4.04364	8.38559	18.1308	8.99335
14707	TAAATTACATAGCATTCAAAATTATTAATGAAAGTAGCATTTTAAAATATGTGATGTATTTTTTCTTCTGCACTTTAAAAAAAAGAACTGCTTTATCGAGGCTTGATTGGCATACAAAAAACTGCACATAGTTAAATGTATACAACGTGATGAATTTGGAGCTATGTACACAATTGTGAAACCATCTCCACAATCTATGCCATGCACTTACTCATCTCCTCTAAAAGTTTCTTATTTCCTTCTTGTTTATTTATTATTTTTGTAATAAGAACACAACATAG	281	chr5	34080022	34080302	-	RP11-1084J3.4	none	5.05005	20.6616	0.000283761	1.80162	2.93637	7.24611	7.72662	8.61778	7.05246	2.26872	1.66751	2.88486	9.46957	35.5365	56.9666	22.2461	11.6626	8.0978	16.5503	11.6036	50.0995	4.40989	16.4534	24.23	26.2836	6.28919	16.5542	14.1324
102456	CTTTCATTTCAAAACAGTAATTTCATACAAATACTTAACAAGTCACATGCATCCAATCTTAATTTTAGAGCATTAAACTTTAAAGTCTCTCGGTGCCATTTAATTTACAGGTTTCTTTCTGCCACCAATATTCATATCTGGAAAACATGGACAGGATTTCTTAATTTTCTGGAGTAAATATTCTGTCTAACACAGTTCCAGTTAACATGTACATTTGCCACATATAGAAAAGAACTAACACATACTGAATTCTGATTTCCGATAACAGAACATAGCATGTATGCTGTCTTACAGTAACAATTAAATGTTTTTCACAATGCGTATTTTTACAGTGGGACAATGAAGCAATACAAACAAAACCAGCAGACACGTTATCTTTAGTAGAAAATGTTATGCAAA…	717	chr5	34098584	34099300	-	RP11-1084J3.4	none	7.62098	29.9116	0.000309256	1.74225	2.93637	7.24611	5.79496	15.512	7.05246	8.31864	8.33757	5.76973	22.727	31.756	96.3253	36.2963	23.3253	12.1467	33.1007	8.70274	69.0049	6.61483	16.4534	50.131	23.2509	13.6266	19.7074	15.4172
28751	GAATACATCTTGGTAATAAAATCTCTGTCTGTCCATGGCCTATAATATAAATTGCATAAATTTCTAGTAATTTGATATCTTGCAATGTTGTAAAAATCAACTACTTTTATACTCCAAATAATAGGGAAACAATGATCATCTAGAGCCCTTGTCAAGGGTCTCCTATTGAGAGTCCTTAGACAGTGTGACACATCTCTATGGCAAAGATCAGATATAATATGTTACATTTACACAAGTAACAGACTTCTGGCTCTCCTCCAACTCAGGTATACTCTTCTGCCGAGAGACTGTACTTCTCAGC	301	chr5	34112048	34112348	-	RP11-1084J3.4	none	7.81098	33.1895	0.000326015	1.82232	4.40455	2.41537	10.6241	14.6502	12.3418	9.07488	4.16878	4.80811	8.52261	46.1218	98.3968	37.4671	22.159	12.1467	20.0346	15.955	87.9104	7.7173	22.852	47.6245	31.3382	22.0122	41.7796	8.99335
18980	TTGTGGCTACATTAACACAACTACATTACATTAATATGACATAGAGATGAAAAAGACCAAGTTAGCTTGTGAAAAATGAATTCAAGAATGTGGATGAGTTTCTTAGTTCAGAATTGCTCAGGAATTGGGACATTATGTAGGTAAGATTCTGGAAAGGGCAAAAGGATGAAAAACAAGAGAAGGCCTAACCCATCTGCTACTTGATTATCTTAATGAAGCAAATCTAGAGATTTATTAAAGTAACTCTTGCTTATTGAGCACCATATTTAACACAAACTATTTAGCTTTAAGGCAA	295	chr5	34088171	34088465	-	RP11-1084J3.4	none	7.3284	25.1144	0.000359155	1.60137	7.34091	2.41537	4.82914	15.512	10.5787	7.5624	7.50381	2.88486	16.0983	38.5608	79.7532	15.221	19.8265	16.1956	15.6793	17.4055	43.4826	6.61483	21.9379	21.7235	29.3164	15.723	27.5903	16.7019
32698	TCACTAGAGTTCAGGAGTTCAAAACCAGCTTGGGCAACAAAGGGAGACCCCATTCCCCCAGCAAAATAATAATAATTCACAACAAGTGAATTGTAACTATCATTCTCCGTTTACTTGTTAAAAATGGAAACTGAGTAACTGATATAAATCTTTAATTATAATCAATCTTTCTTATCAAAAGTTTAGAGGAAATGCTGTAAACTAGTTTCTGGCCAGGAATTCTTCCAAATCAAGATTGAAGACACGTTGGTCATCCCCAGCAATGGAAAGTAGAGAATCTACAAAGTAATATCACAATAGCTTTGCATCCCTTCTTGTGAACTCCGTTTCTTTCCCGGTAATTTCTATTTCTGTTCCAATGGCCTGGAACTTCAGCTTGGAACAGTTCTATTCCAGTGG…	825	chr5	34071508	34072332	-	RP11-1084J3.4	none	3.13582	13.2703	0.000362426	1.79282	0	2.41537	6.76079	4.30889	4.40779	3.02496	4.16878	0	11.3635	18.1463	40.3945	11.7085	10.4964	10.7971	13.0661	5.0766	17.9602	4.40989	6.39855	19.2169	16.1745	3.1446	14.9776	8.99335
16402	CAGAAGACTCATTTGCTGCTGTTCTTCGTGCTGTAACAACAGAGTGTCTGCAAGTGTGGTAGATACGTGCTTGTGCAGATGGAGCCCTCTTACAGAACAGGACAAACTTCTTCTTTTCTGTCAAGGATGGTCCAGGAGTCGAGTGAAGGAAGCCCAGGAGCCAAGGCAGGGAGGCAGGTCTTTTGCCCAGAAAAACAACCAAAGTCCC	208	chr5	34058036	34058243	-	RP11-1084J3.4	none	3.14453	14.3118	0.000390384	1.87863	4.40455	0	1.93165	9.47956	1.76312	3.02496	1.66751	2.88486	17.9922	19.6585	48.6805	15.221	12.8289	10.7971	5.22642	5.0766	29.3035	3.30741	10.9689	14.2038	9.09818	11.5302	8.67124	6.42382
94211	GTTAAGATATGTCATGGTATAAATATATGATCATAATTTTTAAATAATTTTCTAATAATTATAGATTTACAGAAAATATGCAAATGCACTACAAAGAGTTCTTGTATACTCTTCACCTAGCTTTTCCTAACAATAGGATCTTACCTAATAAAGGCACATTCATGAAAACTGAGAAATTAAAATTGATACAGTACTCTTAGGTAAATTATAGCTTATACTTTAATTTCTCCAGCTTTTCACAAATTTCCCTTTTCTGTTTTGAGATCCTATTCACAATGCCATGTCTTATTCAGTCGTTATATCTTCTTGATCTCCTATGATCTATGACAGTCTTTCCTATTAATAGTTTCTTATGACATGAACAGTTTTGAAGAAAAATGCTTAGGTATTTTGTAGAAT…	687	chr5	34103936	34104622	-	RP11-1084J3.4	none	6.23547	22.669	0.00039182	1.67112	7.34091	3.62305	6.76079	14.6502	5.28935	5.29368	5.00254	1.92324	9.46957	28.7316	62.1454	15.221	16.3277	10.7971	20.0346	9.42796	57.6617	9.92224	16.4534	36.7628	16.1745	11.5302	18.9191	23.1258
34668	ACTATCCAGCATTAGATATGAAGATATAATTTTTAAATCTAATACTCATTTAGATTGCTTACTAAGAAACAGCAACAAGGTGAAACAAAATTTCCAACAAACACAGAGCTGGATAATTTCTTAGAAGGAATGCTGGCAGAAAATAATTCTCCACCTAGAATTATATATCCAAATAATGATAATTTCAAATTATTATTTATAATTTTGAAAATATTAATGACACTATTTTTGATGGCCAAATAAAAAAAAAGTTGAACAAAGTGCCTAAGGCTAGGAGAACATTATTGAATAAATTTTTTTATTTTTATTACCTTTCAGAAAGTAGACACAGATCCTCCTATGATGTGTTAGAATGATTAATGGGA	365	chr5	34115028	34115392	-	RP11-1084J3.4	none	8.23806	29.799	0.000409506	1.66107	4.40455	7.24611	12.5558	15.512	9.69714	6.80616	5.8363	3.84649	17.0452	35.5365	97.3611	23.417	13.9952	18.8949	26.1321	17.4055	53.8806	6.61483	22.852	55.1442	33.36	13.6266	29.9552	11.5629
32442	TCACCATTAGACACTGTTTTCAGTCCCTAACTGCCACTATTGGTGCACTTACAGATGCCTAGAATATAAAGTCAGGTATTGCATGAATTGGAAAATAACCAGAGTACATTACAGGGACTGTAATAAACAGTCTTAAAGTGAGGGTAAGACCATGACTTTTAGAAAGATAAAAATAGTGTATGTAGCAATAGGGGAATGGCTAGATAATTATGGCAATACATTCCATGCAACACTGCCCAGAGGTTTAAAATAGTGAAACCGATTTATAAGTATTAGAGAATTGGAAACTTCTTTGAAATATATTTAGTGAAAATATTGTGATGGAACAATTTGAATATAATGACTTCATCTGTATTGTAACATGTACACATGTACAAATATACACATATATA	392	chr5	34083918	34084309	-	RP11-1084J3.4	none	7.16455	28.7101	0.000447009	1.76482	7.34091	3.62305	12.5558	6.89423	14.1049	5.29368	7.50381	0	15.1513	49.1462	92.1823	19.9044	13.9952	22.9438	13.0661	15.955	66.1691	7.7173	18.2816	39.2693	25.2727	15.723	29.1669	15.4172
28867	TTTCAAATCCTCTTTTCAAACATACAGTTTGCTTTCCCACTCTGAAAAAAAAAATGTGATTTATGAAAATTTCACAAGACTATAGATGGCTATACTTAAAGTAAGAATATAAAAAACTGAAACTGATATGATCTAAAACAAAAACGTCAGTTCAGGAAATACAAATCAAGAGTAGAAATATTTGAGTTCCTGAATATCATAGTTCTGAAACATGCATGAATGCCAAAGTGAATTTCTAGGTCTGATTAGAAATCTACTGAATTTCTAAATCTGGACCATTAGACCAAATGTTATTTATTGTAAAAGCATTAGGTGACTTAAACAGGACTTTCACTTGAGGTAGTATTAAAATTAGGAACAATCCATTCCTCAAGTTTAATCAAATACCGATGTTTCTGT…	679	chr5	34119848	34120526	-	RP11-1084J3.4	none	3.63939	15.9551	0.000492098	1.81726	0	2.41537	6.76079	8.61778	3.52623	5.29368	2.50127	0	3.78783	20.4146	52.8236	11.7085	9.33011	8.0978	17.4214	10.8784	19.8507	2.20494	12.7971	19.2169	22.24	16.7712	11.0361	16.7019
87499	TGAGAATAGAACAAGGAGACAGATCAATAAAGAAAAAGATTTTAACACACAACTAACTGTAACACACATCTATCTATAGGACACTCTATTTAGCAAAAGCAGAAAGCATACTTTTTTAAAGTGCACGTGGAACATTTTTAAAAGCCTCAATAAAATTTTTTAAAATTGCAATAATACAAATTATATTCTTCAACCTCAATGAAATTTTAAAAATCTTCAAAAGGAAATTTGAGAAATTTACAAATATGCAGCTATCAAACAACAGATTCTTAAATAAGCAGTGGGTCGAAGAAATTACAAGAAAGGTTTGAAAATGCTTTGAGATGAATATAATGTACATATAAAATGGTAAAAAGTATACAAAAAACTAAAGCAGTTTTCAGAGTGAAACACATAGCT…	676	chr5	34115837	34116512	-	RP11-1084J3.4	none	8.33153	31.7026	0.000524266	1.69852	4.40455	0	8.69244	12.9267	18.5127	11.3436	5.00254	5.76973	18.9391	40.073	92.1823	31.6129	16.3277	16.1956	20.0346	14.5046	56.7164	9.92224	26.5083	59.3217	43.4691	19.9158	29.9552	11.5629
19511	GAAAGAATGTCCAGCATGTGGAACCCTGAAACAGCTCTGTAAGAGGGTGTTAGCAAACTAAGAGCATTTGCTTTACGTGATTTTGGGGTTGTTTAACAAAGTGGGGCTTTGCTTTGGACTTAGAGTGGGAGAAACTGAGTGTGAGAGTAGTTATATGATTGCATTTTTAAATAAATCTTACCAAGAAGGAGAGATGACAAGGTTGAAGCTCCAGGTTTATTTGGGAAGGAAACAGCAGACACTTATATTAGCCGATGTAGAGAAATGTTTGCTATTTTGTGGCTTAGACAATTGTCAAGTTTTGTCTGTGTTTAGACATGAATATGAAGTGGCCTTGTTTTTGTCTTATTTACTACAGTCCCACA	365	chr5	34074432	34074796	-	RP11-1084J3.4	none	8.78988	31.141	0.000614655	1.63784	5.87273	10.8692	8.69244	11.2031	14.9865	5.29368	6.67005	6.73135	23.6739	42.3413	107.719	33.9546	19.8265	14.846	24.39	16.6802	59.5522	9.92224	24.6801	46.789	28.3055	10.482	29.9552	5.13906
70880	ATAGAAGGTTAAAAATGAGACAAAGAGAAAAACAAAACATATTCTGACTTGATCTTCATGTACAGAAAGGAGTGGTTAGTATCAAAATCTTCTACTAGCCCTTTATAGGCCTGAATGTGTCATTTTGATATGCTTGTTCACCGAATCTGCCTGGTGACCACATGGTATCTGGCTAATGTTTCAAAACAAAGACTCATCCACTGAATGATATAATTCCTGTTTTATTATCCTGCTTCTAGAATTCTTGCTTTTGAAATAGGTCTTG	265	chr5	34113322	34113586	-	RP11-1084J3.4	none	8.07605	26.8203	0.000637234	1.55692	2.93637	6.03842	6.76079	16.3738	12.3418	6.04992	8.33757	5.76973	10.4165	41.5852	60.0738	32.7837	10.4964	10.7971	21.7768	19.5812	56.7164	13.2297	14.6253	55.1442	26.2836	23.0604	19.7074	12.8476
101018	GCTCGTAACCTGAGAGTGCTAAGTAGTTCTCAGGACCAACTATGCCAAGGTCAACACGGGAATGCCCAATATGATTGGGATGTGTCATAGTGAAAGCGGACCATCATAGTTGATAGCAACTTTAAGAAAATGTCACTACAGAAGTTAGTTGTTTTTATTACCAAGACAAATGTCAGAGTAGCTGATCCTGAAATGATGAGTTCATGTTTTATTAAAAGTGATGTTTTTCTGAACATACATGTCCTTGAAATCTGCAGCTCCTAGATGCCACTGAAATTTAAATAATTGAGTCAAGCCTCTGCCACTCTGAAATTCTGTGACCCAAATTTTATTGGAGAGCCAAGTTTTCTATATAACTGAGATGTTACTGTCTGCACTCTGATACTAGATGTGT	394	chr5	34076589	34076982	-	RP11-1084J3.4	none	8.77385	29.9156	0.000652652	1.61179	13.2136	10.8692	8.69244	6.03245	15.868	3.7812	5.00254	6.73135	29.3557	46.8779	105.647	31.6129	22.159	14.846	22.6478	9.42796	48.2089	8.81977	19.1956	35.9273	28.3055	11.5302	29.9552	14.1324
75111	TGTGAAATTCAAGGTATTAGTCAAGAAAGCCTCCAGTGAGAAAAAAGGGCTCGACATCAGAAGAATAGCCCATCACTATAGAAAGTTAAATATTCGGAGCTCCAAATTCACATAGGGGGAAATAGCATTGCTCTATCCTCATATATGACACAGGAGAGAATGTTACAGCTTGAGTCTTGTCATGCTTACAATTCAAAGATGAATAAACAAACAACACATAGTGAAATCAAAGTTAAATGAAGCAAGTATGACACCTTAAGAATAAGAATTAAACTGAATGTGCATGTCATCATACTTCTGAAACTGACTTTGGTCAGAGAGGAAAACTTATAAGGAAGAACTCAAGAAGATGAAAGGTAGCATGGAATCTAAAACACAAGAGACAGAAAGTGTAATTAG…	586	chr5	34104949	34105534	-	RP11-1084J3.4	none	6.50202	24.2209	0.000747731	1.67797	4.40455	2.41537	10.6241	11.2031	8.81558	3.7812	5.00254	5.76973	10.4165	26.4633	58.0023	22.2461	20.9927	9.44743	20.0346	13.7793	65.2238	5.51236	18.2816	51.8021	21.2291	5.241	26.0137	12.8476
16648	ATATAAGATGAAGTATAATTGATATTTCTTCTACTCTTTTTTCATAGTTGATTTTAAAAGCAATTGTATGAAATAACATTTACATATTTGTATTTATTGAGCCATCAGCGTAAAAATGCAATGTATTTGACAATAACAGCACAAAGAATGGGGATGGAAACAAAGCATACTACATTGGAGTGAAGAACTTGTATCAGATCCTTTTTTTTTTTTA	214	chr5	34117887	34118100	-	RP11-1084J3.4	none	2.8035	12.2419	0.000781964	1.82959	4.40455	0	1.93165	6.03245	5.28935	2.26872	2.50127	0	5.68174	24.195	22.7866	5.85424	6.99758	6.74817	13.0661	2.17568	17.9602	2.20494	10.0549	27.5721	8.08727	9.43379	18.9191	14.1324
61708	CTTTAGTTCTGTCTATCATTCCTTAGTGTCAACGATGAAAATTATTGTGAACTAACCAAGTTGAATGACAGTGAACAGTGTGAATGACTGGCTGTTCCCCAAATCATATGAACATGTCCTCACACTTAACTTGCTTAACTTGCAAAGCTTTGAATGGTGTTCAAGGTGAGTCTGGAACAAAGTGAACTGCTGTAATTCAATTTTAAGTTCAGTAAAATACAGGGAAATGATCTATGAAATGAAACTTCTCTCTCCTATCTGCTTTAATAAAAAATGTTAGAAATAAGTTATTCATGGTTTCTGTGTTAAAAACATTGTATTATATTTACACCATTGAATATATGTTGTTCCTTAACTGCTTACAC	365	chr5	34098202	34098566	-	RP11-1084J3.4	none	3.44021	18.0599	0.000784713	1.95468	0	0	3.86331	4.30889	7.05246	4.53744	5.8363	1.92324	8.52261	24.195	67.3241	16.3919	9.33011	4.0489	7.83963	4.35137	45.3731	2.20494	10.9689	33.4207	16.1745	7.33739	17.3425	14.1324
117890	CACAGGTGATGTTTACTGTGTTTCTTAACTTGAGGCAAGTACATTTGCAGGGGATTAAATTTAACCTATGACTTAACTTACATGTTCGGCAAGGGATACTGTGCATGGATATCTATAACTAATCAAATAATTAAGAATTTCATTGTTATTTGTGACATAGATAAACTAGGACATACCTATGTTGCCAAGAGTTCTGCCTTTTCACATATAATGTTACACTCTGTAAACCACAAGTTTGATAACAGTATTTTTGTAATTATTAGTAGCTCATTTCTTACATTATACAGCATTATATCATAAAAAGACTATTGAGCTCATTTAACAAATACAACATGGTCATACTATTACTTATGTATGACAAATAATGTAACTAAGCTTATGGAAATTTGCATTTGTTTA…	463	chr5	34068651	34069113	-	RP11-1084J3.4	none	4.66647	17.3151	0.000917282	1.64925	0	3.62305	4.82914	6.03245	4.40779	5.29368	8.33757	4.80811	9.46957	26.4633	54.8951	19.9044	13.9952	5.39853	14.8082	12.3289	29.3035	8.81977	18.2816	28.4076	16.1745	4.1928	9.45954	5.13906
20806	TTTTCTGCCCTTCCCCTACAAATACCAAGGATCTGGTATTCTTACATTTAAGAAATACATAAATGAACAGAAAATTAACCACCACTAAATAGAGGAAATGGAGCTTGTCTTAGTCTATTCAGGTTGTAATAATAAAATACCATAAATTGGGTGCTTTATAAACAAGTTTATTACACAGTTCTGGAGGCTGGAAAATCCAAGATCAAGGCATTAGCAGATTTGGTGTCTATTGAGGGTCCACAACCTGCTTCGCAGATGGCTGTCTTTTCAATGTGTCATTACGTGGCAGAAGGAAAGAAGGGGCTCCCTGAAGTCTCTTT	320	chr5	34090832	34091151	-	RP11-1084J3.4	none	5.29497	19.1187	0.00111068	1.64006	5.87273	3.62305	4.82914	7.756	8.81558	4.53744	5.00254	1.92324	6.6287	33.2682	62.1454	16.3919	16.3277	9.44743	14.8082	6.52705	34.9751	2.20494	13.7112	30.0786	16.1745	11.5302	14.9776	16.7019
96627	GTCCCACAATGGCCTTGTCTGATGTTGATTCTTTCTCAAATTGTTTGCATTCAGCATAACGACAAGACCTAACTGGGCTCCTGCTCCAAGCTAACAGGGACTGCTCTTATCTTTCTTGTAGACACGTGAATTCAATTTAAAGACATGATTTATTGATTTCTGCACCTCTGTTTTCTCACCAGTACAATAATAATATCTGA	200	chr5	34074240	34074439	-	RP11-1084J3.4	none	5.40101	19.4098	0.00119192	1.63397	2.93637	3.62305	10.6241	4.30889	5.28935	3.02496	6.67005	6.73135	14.2044	22.6828	67.3241	15.221	13.9952	6.74817	11.3239	13.0541	33.0846	3.30741	17.3675	31.7497	14.1527	8.38559	31.5318	6.42382
12670	ACCAAAACAGATATATAGACCAATGGAACAAAACAGAGGCCTAGGAAATAACACCACACATCTACAATCTTCTGGTCTTTGGCAAGCCTGTCAATAACAAGCAATGAGAAAAGGATTCCCTATTTAATAAATAGTATTGGGAAAACTGGATAACAATATGCACAAAACTGAAACTGGACTCCTTCTTATACCTTATAGAA	200	chr5	34085434	34085633	-	RP11-1084J3.4	none	3.35879	14.5432	0.00119589	1.77804	0	0	3.86331	3.44711	5.28935	5.29368	4.16878	4.80811	9.46957	21.9267	38.323	15.221	4.66505	4.0489	13.9371	6.52705	36.8657	7.7173	9.14078	25.0655	8.08727	4.1928	23.6488	3.85429
68759	CAAAAAGAAAGCTATTTTGATTTTTTTAAAAAAGAGAATTGTCAAACTTCTGGGAAAATATAATATTTATACAAACCAATGTCTAGATGGCATATTTTATGAAAATTGAAAGTGACCTCATCTAAGTTTTATGGCTTTGGGAAACAAATATGCAGCACCAGCCATAAGCCTATATCTTTTAAAGTGTTGGGAAATAATAAATATGAATGATTACTGGAAAGAATGGACTTGTTAGGCTCAAAATGAATACTATTTGGGTTAGTTTATTTTTAGAATAATAAAATGCAATACTTTAAAATTTTTTGTAACTCAGTGTGC	318	chr5	34100903	34101220	-	RP11-1084J3.4	none	4.04395	15.3333	0.00121429	1.66728	2.93637	0	4.82914	7.756	5.28935	3.7812	5.8363	1.92324	16.0983	19.6585	50.752	12.8793	5.83132	4.0489	12.195	7.97751	31.194	3.30741	13.7112	20.0524	13.1418	9.43379	17.3425	7.70859
13863	TTATGCCAGAAAGTTTGTTGTAAGTGCTTATAGCTGCAATAGAAAACAATACAGTTGTTTATAAAAGGGAGATTCCCTAAGCAGAGTATAATAGAGAGACGGTTGCTTGTGAGGGGTGGCAGAGAGGCATGGAGGAATCTCTATGGCACTATGTCCCTGACATCTAATCTTTAAAGTTGTACAGGATCTGACAAATAAGAGAACCTTGCCCTATCATTGGGATAATTCTCTTTAGAAAACTGGGGAAGCTTTTAATGTCAAAGAGCTATGACATTTTAGCACTATGAGGTAGATTAAGATTTCTCCCTTAGGATAGTAACACTCAGAGATATTGATCAGATTCTAAGAGCTTGAATTGTTGTTTTTTTAAAAGAATATTCTGAGTTATACCATTTCGAT…	808	chr5	34118838	34119645	-	RP11-1084J3.4	none	6.01715	23.4405	0.00139993	1.69358	2.93637	2.41537	2.89748	16.3738	7.05246	8.31864	3.33503	4.80811	9.46957	43.0974	72.5029	21.0753	10.4964	13.4963	21.7768	8.70274	50.0995	4.40989	15.5393	45.1179	19.2073	11.5302	11.8244	16.7019
20485	AATTTGGCAAAGCCAAATGTGATTACAAATTAAACTGTGTCTTAAACCAGTAATTTTCATTTGTAGCATTTAAAGCACAAAGAAAAAAAAAAGCATATCTGTTCTGCTGTCCTGGAAATTGGGAGTACAACATAATCATTGACAACATGAAGAGAATATAGATCAGGGTGTAGAGTAGTTAAGAAAGATTTTTCTGAGAATAAAATATTGAAGACAAAAAAGAGCCTGTTTTAATCTATTCCTGTGACCTCAATTTCTGAGATGACATGCAAGGAACTAAAATACACACACCTCATGTTTGCTGAAAATCTGATATTATTTATATGTATATATGTTTATGTAGATGTAGATATGGA	356	chr5	34123464	34123820	-	RP11-1084J3.4	none	9.0885	30.2439	0.00140074	1.55281	4.40455	12.0768	11.5899	13.7885	7.93402	6.04992	9.17132	7.69297	12.3104	46.1218	116.005	31.6129	16.3277	10.7971	18.2925	15.2298	62.388	9.92224	19.1956	40.1048	21.2291	15.723	26.802	21.841
43741	GGGAGGTCTCTCTCAGACTTATTTTATAAAGTCACTCATTTCATTCATGAAGGCTTTACTCCGATGACCTAATCATTTTCCAAAAGCCCCACCTCCTTATACCATCATTTTGGGGATTAGAGTTTCAACATGTGAATTTTGGAAAGGTACAAATGTTCAGACCATAACAGGTAAAATATCATTTTTCTAATTCTCCCTGTGCAAATATTTACAAATGCCAAATGACATGGTTTGGCTCTGAGTTCCCACCCAAATCTTATCTTGAATTGTACTCCCATAGTTCCCAAGTGTTGTGGGAGGGAGCTGGTGGGAGATCATTTGAATCATGGGGATGGTTTTCTTCATGGTGTTCTCATGATAGTGAATG	367	chr5	34121618	34121983	-	RP11-1084J3.4	none	5.90748	25.2637	0.00152555	1.7693	0	2.41537	6.76079	7.756	9.69714	8.31864	7.50381	4.80811	15.1513	35.5365	87.0035	39.8088	12.8289	12.1467	22.6478	8.70274	42.5373	0	10.9689	42.6114	9.09818	17.8194	26.802	20.5562
111618	CAAAATAATAAGTTTATTATCAATTGCAGTTCAAAATCCCAAAGGGATAAAATCTAAGGAGAAAATGATAAGGTTTATCTCACTTATAGGGTGGAAAGTTTCAAGAAAATGACCACCTTAAATTTGATTACAAGCTGCATAATATGCAGGTTTGGAAAATAAGCTTTAATGTTTGGTTTACCGGCAATTAGTGTCAAGCTTAGATACAGATGGTATGTTGTTAATCTGTTAAAGCTGGGGCTGTCTTTCAAGAATTAAAACAAATCAACAAAGTTGATTGCTATATAATTGAATATCCACAATTTCATTTTGCTCTAAATGTATTTACG	329	chr5	34071087	34071415	-	RP11-1084J3.4	none	6.02479	22.0742	0.00188601	1.64599	8.8091	2.41537	8.69244	12.0649	4.40779	6.80616	5.00254	0	13.2574	42.3413	66.2884	24.5878	16.3277	8.0978	16.5503	15.2298	41.592	6.61483	4.57039	34.2562	22.24	8.38559	21.284	11.5629
94125	GAGGGCATGTGTGCATCATCTGGAAAAAAAGGTGCATGTCTCTTAGCAACTCCAAATTAGTGATATCCTTTTGTAGCATCAGCTATCTTCCCAGCCTCTAGAACTATGACAAGTCATTTTCTGTTGTTTGCAAGCCACTCAGTCTAAAGCATTGTGTTATGGCAACCTGAATGGACTGAGACAACTATTAAAATGCTTAGCATTTGGAAATTTCTTGCATCTGTAGCCTTGTTTTCTCAGCCTTCCCACTAACCCCTCTTACTCTACAATTTAGC	275	chr5	34096243	34096517	-	RP11-1084J3.4	none	6.49479	23.6533	0.00227734	1.62661	4.40455	4.83074	10.6241	7.756	8.81558	6.80616	5.8363	2.88486	16.0983	34.7804	81.8247	14.0502	12.8289	10.7971	24.39	6.52705	42.5373	7.7173	10.9689	48.46	32.3491	10.482	22.0723	2.56953
[truncated: 241 more rows]

## Sheet: spliced_contigs
LineInSam	contig	size	chromosome	start	end	strand	HUGO_ID_gene	HUGO_ID_as_gene	meanA	meanB	pvalue	log2FC	B67T15	B67T14	B67T13	B67T10	B65T8	B65T6	B65T4	B65T2	B65T3	B65T1	B67T11	B67T12	B67T18	B67T19	B67T20	B67T21	B67T22	B67T24	B65T5	B65T7	B67T16	B67T9	B67T17	B67T23
[truncated: 54 more rows]

## Sheet: repeat_contigs
LineInSam	contig	size	chromosome	start	end	strand	HUGO_ID_gene	HUGO_ID_as_gene	meanA	meanB	pvalue	log2FC	B67T15	B67T14	B67T13	B67T10	B65T8	B65T6	B65T4	B65T2	B65T3	B65T1	B67T11	B67T12	B67T18	B67T19	B67T20	B67T21	B67T22	B67T24	B65T5	B65T7	B67T16	B67T9	B67T17	B67T23
[truncated: 167 more rows]

[truncated: 1 more sheets: unmapped_contigs]
