# Supplementary material for: Reference-free transcriptome exploration reveals novel RNAs for prostate cancer diagnosis
Source: Life Sci Alliance. 2019 Nov 15;2(6):e201900449. doi: 10.26508/lsa.201900449 (PMC6858606; doi:10.26508/lsa.201900449)
Supplement: Supplementary file 4 [file LSA-2019-00449_TableS4.xlsx]

## Sheet: pvalue<0.05
Table S4. Differential expression analysis of the GENCODE annotated genes from the total stranded RNA-seq datasets. Only hits with adjacent p-value below 0.05 are presented.
id	gene_name	chromosome	start	end	strand	gene_type	normal_1	normal_2	normal_3	normal_4	normal_5	normal_6	normal_7	normal_8	tumor_1	tumor_2	tumor_3	tumor_4	tumor_5	tumor_6	tumor_7	tumor_8	tumor_9	tumor_10	tumor_11	tumor_12	tumor_13	tumor_14	tumor_15	tumor_16	Mean_normal	Mean_tumor	Median_normal	Median_tumor	FoldChange	log2FoldChange	pvalue	padj
ENSG00000226779.1_3	NAALADL2-AS2	chr3	174952651	174988885	-	as_lncRNA	20.6759	5.72408	14.2447	17.0333	9.26372	11.6541	9.26372	4.36203	16.0624	8.8727	9.26372	200.021	12.8947	6.83023	6.35678	3.08791	14.7476	28470.5	8.44591	17.7454	3184.42	7.63355	47.9823	17.9594	11.5277	2002.05	10.4589	13.8212	173.562	7.4393	8.85876e-09	1.11526e-06
ENSG00000149021.6_3	SCGB1A1	chr11	62172575	62190667	+	protein_coding_gene	1603.53	216.561	673.95	78.1526	768.889	83.6976	141.014	341.329	23.5582	13.3091	8.23442	17.4882	10.9109	8.78173	1.05946	5.14651	5.67217	26.7619	24.282	21.0727	13.4695	16.3576	10.9051	7.85723	488.391	13.4292	278.945	12.11	0.027485	-5.18521	5.5616e-28	3.08307e-23
ENSG00000132517.14_3	SLC52A1	chr17	4935895	4955304	-	protein_coding_gene	49.0096	50.5627	50.7466	30.0587	28.8205	51.9137	28.8205	23.9912	9.63744	8.8727	3.08791	6.55806	8.9271	7.80598	5.29732	4.11721	3.4033	8.23442	5.2787	7.76361	3.36739	5.45254	5.45254	5.61231	39.2404	6.17928	39.5342	5.53242	0.157273	-2.66866	5.04027e-27	1.39704e-22
ENSG00000231806.2_3	PCAT7	chr9	97317351	97330409	+	as_lncRNA	35.2257	29.5744	40.0631	77.1507	29.8498	29.665	18.5274	9.81457	119.933	194.09	267.619	156.3	215.242	544.467	727.851	462.157	332.389	375.695	201.646	367.108	428.781	160.305	502.724	390.617	33.7338	340.433	29.7574	349.748	10.0777	3.3331	3.35914e-24	6.20713e-20
ENSG00000176153.11_3	GPX2	chr14	65405870	65409623	-	protein_coding_gene	952.624	201.297	348.104	71.139	99.8423	108.065	66.9046	539.801	26.7707	4.43635	7.20512	17.4882	13.8866	13.6605	11.6541	5.14651	6.8066	36.0256	7.39017	13.3091	8.9797	18.5386	7.63355	3.36739	298.472	12.6437	154.681	10.3169	0.0423914	-4.56008	3.50136e-23	4.85245e-19
ENSG00000084207.15_3	GSTP1	chr11	67351066	67354131	+	protein_coding_gene	4347.31	3707.3	4558.29	3576.99	2231.53	3833.14	4631.86	5257.34	1231.45	825.161	1045.77	594.598	879.815	886.955	307.244	473.479	530.915	951.075	866.762	979.324	955.215	609.594	318.428	254.799	4017.97	731.912	4090.22	845.962	0.182167	-2.45667	2.6422e-22	2.9294e-18
ENSG00000143320.8_3	CRABP2	chr1	156669398	156675608	-	protein_coding_gene	935.777	567.638	748.735	167.327	332.465	668.521	726.687	637.947	123.145	73.1998	63.8167	110.394	71.4168	120.993	54.0326	38.0842	68.066	80.2856	58.0656	86.5088	111.124	100.327	58.8874	7.85723	598.137	76.6377	653.234	72.3083	0.128124	-2.96439	2.08105e-21	1.92272e-17
ENSG00000240801.1_4	AC132217.1	chr11	2150351	2151194	-	sRNA	614.152	168.86	166.484	269.526	194.538	131.373	212.036	246.455	61.0371	42.1453	56.6116	36.0693	46.6193	54.6419	52.9732	24.7033	70.3349	34.9963	44.341	23.2908	44.8985	75.245	46.8918	28.0616	250.428	46.4288	203.287	45.7589	0.185214	-2.43273	3.68119e-21	2.91524e-17
ENSG00000167244.18_4	IGF2	chr11	2150342	2162468	-	protein_coding_gene	1727.59	360.617	388.167	722.411	543.472	272.282	468.333	526.715	152.057	118.672	120.428	92.9059	105.141	117.09	133.492	63.8167	155.417	84.4028	121.41	67.6543	104.389	164.667	89.4216	66.2253	626.198	109.824	497.524	111.116	0.175299	-2.51211	1.05898e-20	7.33804e-17
ENSG00000100427.15_3	MLC1	chr22	50497820	50524331	-	protein_coding_gene	192.975	27.6664	66.7718	161.315	206.89	26.4866	43.2307	252.998	18.204	11.0909	13.3809	13.1161	7.9352	19.515	18.0109	6.17581	4.53773	7.20512	6.33443	4.43635	7.85723	15.2671	7.63355	4.48985	122.292	10.3244	114.043	7.89622	0.0845738	-3.56365	4.5793e-19	2.82059e-15
ENSG00000197168.11_3	NEK5	chr13	52607747	52703214	-	protein_coding_gene	142.434	285.25	276.88	316.618	167.776	238.379	298.498	74.1545	613.583	1592.65	1853.77	988.081	2820.96	2929.19	1646.41	1824.95	1376.07	1012.83	1620.56	664.344	1432.26	1242.09	599.779	700.416	224.999	1432.37	257.63	1404.16	6.36636	2.67047	6.3351e-19	3.51186e-15
ENSG00000145777.14_3	TSLP	chr5	110405760	110413722	+	protein_coding_gene	372.167	193.665	324.956	318.622	371.578	175.871	127.633	181.024	71.7454	60.9998	20.586	37.1624	48.6031	52.6904	19.0703	31.9084	45.3773	53.5237	81.2919	57.6726	32.5514	41.4393	8.72406	25.8166	258.19	43.0727	256.144	43.4083	0.1668	-2.58381	7.57814e-19	3.81904e-15
ENSG00000180739.13_3	S1PR5	chr19	10623418	10628607	-	protein_coding_gene	78.1091	59.1489	125.531	44.0861	66.9046	49.7948	38.0842	67.6115	16.0624	8.8727	8.23442	6.55806	19.838	23.4179	11.6541	9.26372	6.8066	15.4395	17.9476	21.0727	8.9797	8.72406	8.72406	3.36739	66.1588	12.1852	63.0268	9.12171	0.184683	-2.43687	1.82782e-18	8.44379e-15
ENSG00000171401.14_4	KRT13	chr17	39657233	39661957	-	protein_coding_gene	16410.6	1808.81	1445.83	211.413	285.117	1169.65	191.45	456.923	23.5582	19.9636	4.11721	18.5812	18.8461	23.4179	7.41624	13.3809	60.125	204.831	22.1705	68.7634	7.85723	68.702	4.36203	1.12246	2747.47	35.4509	813.285	19.4048	0.0129041	-6.27603	6.16283e-18	2.62797e-14
ENSG00000188643.10_3	S100A16	chr1	153579362	153585621	-	protein_coding_gene	1991.78	523.754	590.263	457.894	439.512	541.386	690.662	598.689	126.357	181.89	97.7837	98.3709	187.469	163.926	57.211	95.7251	107.771	145.132	194.256	180.781	196.431	141.766	102.508	43.776	729.243	132.572	565.824	134.062	0.181748	-2.45999	9.36904e-18	3.70981e-14
ENSG00000063180.8_3	CA11	chr19	49141199	49149569	-	protein_coding_gene	277.211	313.871	333.859	440.861	241.886	337.969	416.867	555.068	182.04	92.0543	99.8423	97.2779	114.068	103.429	58.2705	44.26	83.948	130.721	124.577	150.836	122.348	83.9691	141.766	67.3477	364.699	106.047	335.914	101.636	0.290873	-1.78154	3.74868e-17	1.38539e-13
ENSG00000234465.10_3	PINLYP	chr19	44080952	44088116	+	protein_coding_gene	97.2534	159.32	160.252	164.321	125.575	133.492	215.124	171.21	43.9039	41.0362	27.7912	39.3484	39.676	68.3023	23.3082	31.9084	29.4953	75.1391	52.787	57.6726	50.5108	31.6247	33.8057	13.4695	153.319	41.2362	159.786	39.5122	0.269419	-1.89208	4.19594e-17	1.45376e-13
ENSG00000142619.4_3	PADI3	chr1	17575593	17610728	+	protein_coding_gene	690.729	86.8153	164.704	4.00783	11.3223	83.6976	23.674	49.0728	12.8499	6.65453	3.08791	4.37204	3.9676	6.83023	1.05946	4.11721	5.67217	6.17581	3.16722	5.54544	3.36739	2.18102	4.36203	5.61231	139.253	4.93889	66.3852	4.36704	0.0354204	-4.81927	6.05593e-17	1.97477e-13
ENSG00000164764.10_3	SBSPON	chr8	73976775	74036323	-	protein_coding_gene	2089.03	1099.02	1221.48	1688.3	2368.42	513.84	601.113	1305.34	388.71	103.145	290.263	80.8828	209.291	207.834	36.0217	78.227	161.089	305.703	193.2	147.509	231.227	177.753	61.0684	243.574	1360.82	182.219	1263.41	185.477	0.133909	-2.90068	6.68288e-17	2.05814e-13
ENSG00000250767.1_3	AC139783.1	chr5	33997149	33997829	-	pseudogene	4.59465	11.4482	19.5864	107.209	15.4395	14.8325	17.4981	15.2671	256.998	997.07	388.047	1587.05	736.982	194.174	666.402	1252.66	4041.99	40.1428	570.099	265.072	180.716	260.631	283.532	268.268	25.7345	749.364	15.3533	335.789	29.1449	4.86517	1.25915e-16	3.67373e-13
ENSG00000232677.6_2	LINC00665	chr19	36803969	36822620	-	lncRNA	320.86	641.097	730.038	477.934	501.27	691.829	731.834	347.872	1052.62	1340.89	1762.17	1250.4	1423.38	1251.88	1420.74	994.306	1742.49	1308.24	1626.89	1129.05	1031.54	1676.11	1441.65	1436.75	555.342	1368.07	571.184	1380.81	2.46384	1.30091	3.20633e-16	8.88715e-13
ENSG00000103485.17_3	QPRT	chr16	29690329	29710020	+	protein_coding_gene	232.03	220.377	224.353	232.454	404.516	175.871	270.706	350.053	76.0287	44.3635	74.1098	32.7903	119.028	66.3508	28.6055	31.9084	79.4103	81.3149	107.685	51.018	87.552	47.9823	61.0684	28.0616	263.795	63.5799	232.242	63.7096	0.24122	-2.05158	4.05504e-16	1.07043e-12
ENSG00000166206.14_3	GABRB3	chr15	26788693	27184686	-	protein_coding_gene	1317.9	1680.97	2429.6	1580.09	912.991	1634.75	1220.75	718.645	6428.17	5028.6	4715.23	2619.95	14720.8	8955.41	5124.62	7382.16	4166.77	12473.1	4668.48	4464.08	4212.6	6810.22	8539.77	5057.81	1436.96	6585.48	1448.99	5091.22	4.58273	2.19621	4.93027e-16	1.1883e-12
ENSG00000226306.6_2	NPY6R	chr5	137136882	137146440	+	pseudogene	36.7572	187.941	210.109	76.1487	68.9632	74.1624	46.3186	16.3576	6.42496	12.2	7.20512	4.37204	2.9757	4.87874	1.05946	4.11721	9.07546	9.26372	20.059	2.21818	1.12246	10.9051	3.27152	15.7145	89.5947	7.17895	71.5628	5.65185	0.0799829	-3.64416	4.83526e-16	1.1883e-12
ENSG00000105707.13_3	HPN	chr19	35531410	35557475	+	protein_coding_gene	117.929	1070.4	914.329	1105.16	251.15	1114.56	760.654	260.631	2574.27	5067.42	7873.13	6149.28	3164.16	6821.45	3704.94	4024.57	3402.16	2182.12	8224.21	2263.65	3360.65	9756.77	5669.55	7311.72	699.351	5096.88	837.492	4546	7.28842	2.86561	5.75725e-16	1.32981e-12
ENSG00000142494.13_3	SLC47A1	chr17	19398698	19482347	+	protein_coding_gene	507.709	216.561	390.838	282.552	500.241	244.736	295.41	329.333	172.403	122	85.4321	130.068	136.882	101.478	70.984	65.8753	68.066	157.483	103.462	95.3815	141.43	97.0552	68.702	58.368	345.922	104.692	312.372	99.2665	0.302594	-1.72455	8.58114e-16	1.90278e-12
ENSG00000242110.7_3	AMACR	chr5	33986283	34008213	-	protein_coding_gene	1150.19	2576.79	2795.51	9214	869.76	2251.36	2842.93	3769.89	26543.6	99718.1	34748.2	104733	31538.4	19193	86990.4	96592.8	232028	2595.9	26068.3	30711.7	15716.7	51438.2	12136.3	32066.5	3183.8	56426.2	2686.15	31802.5	17.723	4.14755	1.03785e-15	2.21282e-12
ENSG00000145113.21_3	MUC4	chr3	195473636	195539148	-	protein_coding_gene	5355.83	564.776	259.075	197.386	484.801	158.919	513.622	403.488	59.9663	26.6181	32.9377	57.9295	69.433	57.5691	5.29732	49.4065	18.1509	171.893	34.8394	44.3635	65.1028	27.2627	14.1766	8.9797	992.237	46.4954	444.145	39.6014	0.0468703	-4.41518	2.12788e-15	4.36884e-12
ENSG00000189280.3_3	GJB5	chr1	35220648	35224113	+	protein_coding_gene	276.445	110.666	145.117	51.0998	42.2014	67.8056	106.018	91.6026	10.7083	4.43635	4.11721	20.7672	19.838	5.85449	2.11893	7.20512	6.8066	21.6153	12.6689	32.1635	5.61231	5.45254	2.18102	2.24492	111.369	10.2369	98.8104	6.33054	0.0918831	-3.44406	2.38952e-15	4.73083e-12
ENSG00000214860.4_3	EVPLL	chr17	18280976	18292961	+	protein_coding_gene	26.0364	57.2408	73.0038	25.0489	29.8498	43.438	48.3772	22.9007	4.28331	5.54544	4.11721	7.65107	7.9352	2.92724	1.05946	3.08791	2.26887	17.4981	11.6131	4.43635	6.73477	2.18102	1.09051	1.12246	40.7369	5.222	36.6439	4.20026	0.128626	-2.95874	2.58133e-15	4.93434e-12
ENSG00000197766.7_3	CFD	chr19	859643	863630	+	protein_coding_gene	1850.88	403.548	459.39	937.832	1327.8	401.537	441.571	410.031	199.174	160.818	108.077	95.0919	81.3358	146.362	82.6381	116.311	105.502	283.058	52.787	147.509	70.7151	185.386	76.3355	35.9188	779.073	121.689	450.48	106.79	0.15619	-2.67862	3.84001e-15	6.8668e-12
ENSG00000171954.12_3	CYP4F22	chr19	15619304	15663128	+	protein_coding_gene	107.209	28.6204	157.581	45.0881	123.516	27.546	33.967	197.382	24.629	12.2	11.3223	12.0231	13.8866	10.7332	5.29732	10.293	9.07546	12.3516	6.33443	12.2	23.5717	6.54305	20.7196	6.73477	90.1137	12.3697	76.1483	11.6727	0.137181	-2.86585	3.75358e-15	6.8668e-12
ENSG00000161149.12_3	TUBA3FP	chr22	21362482	21368581	-	lncRNA	13.784	28.6204	34.7213	22.0431	25.7326	26.4866	26.7619	35.9868	11.7791	5.54544	4.11721	5.46505	10.9109	7.80598	2.11893	4.11721	9.07546	10.293	4.22296	5.54544	8.9797	2.18102	5.45254	3.36739	26.7671	6.31108	26.6242	5.50525	0.237304	-2.07519	5.32064e-15	9.21717e-12
ENSG00000171867.16_3	PRNP	chr20	4666882	4682236	+	protein_coding_gene	10312.7	6523.55	7740.19	6968.61	7227.76	5924.52	6775.9	7417.63	4435.36	4220.08	3530.51	4092.23	3966.61	4331.34	4141.44	4112.06	3990.94	3852.68	5661.93	4232.28	4008.31	5436.18	3724.08	3778.21	7361.36	4219.64	7098.19	4102.15	0.573176	-0.80295	6.07516e-15	1.02053e-11
ENSG00000223400.1_2	AP006748.1	chr21	42948062	42953246	-	lncRNA	5.36043	32.4365	3.56116	35.0685	1.0293	8.4757	22.6446	1.09051	417.622	219.599	390.106	467.808	388.825	355.172	740.565	341.728	323.313	24.7033	476.138	112.018	104.389	174.481	5.45254	1087.67	13.7083	351.849	6.91807	348.45	25.68	4.68257	6.66395e-15	1.08652e-11
ENSG00000225937.1_3	PCA3	chr9	79379352	79402485	+	as_lncRNA	283.337	1647.58	816.397	121.237	45.2893	1113.5	2394.16	147.219	73622.5	75622	58612.6	83132.2	20299.2	27337.5	6695.81	1106.5	44712.5	49511.5	66354.3	4116.93	961.95	252.998	44318.2	16429.5	821.089	35817.9	549.867	35827.9	43.6229	5.44701	7.11443e-15	1.12682e-11
ENSG00000261211.1_3	AL031123.2	chr6	6680542	6683866	-	lncRNA	14.5497	26.7124	11.5738	14.0274	20.586	20.1298	17.4981	9.81457	65.3204	29.9454	86.4614	45.9064	61.4978	145.386	138.79	50.4358	88.4858	43.2307	99.2395	41.0362	152.655	126.499	155.943	126.838	16.8615	91.1044	16.0239	87.4736	5.40624	2.43463	7.74365e-15	1.19241e-11
ENSG00000095627.9_3	TDRD1	chr10	115939029	115992063	+	protein_coding_gene	76.5775	136.424	33.8311	789.542	27.7912	229.903	39.1135	38.1678	11049.9	9955.17	17599	9614.12	8005.62	11848.5	1405.91	10680	5654.01	88.52	831.922	302.781	9664.4	214.83	11101.4	915.929	171.419	6808.25	57.8455	8809.87	39.7203	5.31181	1.54386e-14	2.31308e-11
ENSG00000213424.8_3	KRT222	chr17	38810917	38821433	-	protein_coding_gene	71.9829	180.309	74.7844	368.72	298.498	64.6272	98.813	130.861	25.6998	26.6181	12.3516	17.4882	31.7408	55.6176	49.7948	6.17581	14.7476	23.674	24.282	17.7454	28.0616	20.7196	9.81457	13.4695	161.074	23.6251	114.837	22.1968	0.146919	-2.76691	1.61484e-14	2.35575e-11
ENSG00000090776.5_3	EFNB1	chrX	68048840	68061990	+	protein_coding_gene	919.696	381.606	646.351	441.863	505.387	452.391	516.71	541.982	177.757	139.745	196.597	156.3	177.55	186.368	177.99	78.227	170.165	274.824	355.784	169.69	131.328	203.925	152.671	105.511	550.748	178.402	511.049	173.858	0.323881	-1.62646	1.75705e-14	2.43506e-11
ENSG00000189334.8_3	S100A14	chr1	153586731	153589462	-	protein_coding_gene	933.48	392.1	372.142	135.264	122.487	332.671	303.644	801.523	74.9578	76.5271	12.3516	41.5344	25.7894	25.3694	5.29732	23.674	29.4953	48.3772	46.4525	97.5997	20.2043	11.9956	5.45254	4.48985	424.164	34.348	352.406	25.5794	0.0809464	-3.62689	1.72788e-14	2.43506e-11
ENSG00000215915.9_3	ATAD3C	chr1	1385069	1405538	+	protein_coding_gene	129.416	134.516	146.008	90.1761	89.5493	143.028	146.161	222.464	73.887	29.9454	31.9084	36.0693	47.6112	34.1512	33.9028	49.4065	12.4788	50.4358	46.4525	21.0727	23.5717	38.1678	43.6203	12.3471	137.665	36.5643	138.772	35.1103	0.266104	-1.90994	2.39313e-14	3.23569e-11
ENSG00000170477.12_3	KRT4	chr12	53200333	53208335	-	protein_coding_gene	1915.2	593.397	480.757	25.0489	273.794	200.239	146.161	32.7152	27.8415	13.3091	2.0586	38.2554	19.838	51.7146	2.11893	6.17581	19.2854	54.553	13.7246	21.0727	7.85723	8.72406	19.6291	2.24492	458.414	19.2752	237.016	16.505	0.0420689	-4.5711	2.93317e-14	3.87143e-11
ENSG00000197822.10_3	OCLN	chr5	68788119	68853931	+	protein_coding_gene	1699.26	1620.87	1890.98	1207.36	1129.14	1601.91	1349.42	1123.22	2305.49	2627.43	5996.71	4490.09	2739.63	3822	2292.68	4625.68	4999.45	4143.97	2995.13	3336.14	4310.25	2671.74	4525.61	3507.69	1452.77	3711.86	1475.66	3664.85	2.55475	1.35318	3.05923e-14	3.94392e-11
ENSG00000242583.1_3	AC008040.2	chr3	169780032	169780739	+	pseudogene	29.0995	32.4365	37.3922	40.0783	16.4688	45.5569	43.2307	46.8918	109.224	77.6361	129.692	126.789	107.125	83.9143	121.838	83.3735	79.4103	107.047	86.5706	75.418	205.411	201.744	97.0552	124.593	36.3943	113.553	38.7352	107.086	3.12599	1.64431	4.05872e-14	5.11352e-11
ENSG00000250522.1_3	AC004066.2	chr4	106461347	106473512	-	as_lncRNA	81.1722	245.182	376.593	316.618	134.839	400.477	226.446	91.6026	1522.71	890.597	1697.32	1278.82	1303.36	1089.91	758.576	1447.2	1984.12	659.783	954.388	929.415	546.639	514.72	604.141	1277.36	234.116	1091.19	235.814	1022.15	4.66158	2.22082	4.75331e-14	5.85555e-11
ENSG00000164175.14_3	SLC45A2	chr5	33944721	33984835	-	protein_coding_gene	42.8834	56.2868	106.835	159.311	96.7544	77.3408	65.8753	65.4305	486.155	1412.98	3213.48	5516.42	3900.15	469.335	1571.18	2031.84	28261	131.751	464.525	364.89	189.696	803.704	167.938	1636.55	83.8397	3163.85	71.6081	1108.34	37.74	5.23802	5.04283e-14	6.07716e-11
ENSG00000218803.1_2	GSTM2P1	chr6	111368071	111368724	-	pseudogene	126.353	202.251	259.965	186.364	308.791	255.331	208.948	189.748	81.3828	57.6726	59.6995	25.1392	64.4735	60.4964	33.9028	27.7912	46.5118	76.1684	101.351	41.0362	24.6942	39.2583	21.8102	10.1022	217.219	48.2181	205.6	43.774	0.222253	-2.16973	6.77712e-14	7.9934e-11
ENSG00000114115.9_3	RBP1	chr3	139236276	139258671	-	protein_coding_gene	488.565	251.86	373.032	477.934	555.823	366.574	434.366	308.614	147.774	119.781	125.575	99.4639	192.429	145.386	51.9137	63.8167	91.8891	166.747	95.0165	161.927	224.492	126.499	107.96	63.9803	407.096	124.041	403.699	122.678	0.304717	-1.71446	7.07754e-14	8.17382e-11
ENSG00000189129.13_3	PLAC9	chr10	81891438	81905115	+	protein_coding_gene	218.246	150.734	86.3582	368.72	227.476	108.065	179.099	76.3355	77.0995	18.8545	46.3186	29.5113	8.9271	45.8601	3.17839	11.3223	14.7476	27.7912	22.1705	24.3999	14.592	17.4481	21.8102	23.5717	176.879	25.4752	164.916	21.9903	0.144099	-2.79486	7.98389e-14	9.03239e-11
ENSG00000181195.10_3	PENK	chr8	57349233	57359293	-	protein_coding_gene	443.384	89.6773	128.202	731.429	853.292	531.85	201.743	753.541	81.3828	18.8545	26.7619	17.4882	30.7489	26.3452	3.17839	2.0586	13.6132	39.1135	133.023	8.8727	16.8369	11.9956	4.36203	14.592	466.64	28.0767	487.617	17.1625	0.0602027	-4.05403	8.16697e-14	9.05472e-11
ENSG00000232806.1_3	AP001610.2	chr21	42931052	42934885	-	lncRNA	3.82888	19.0803	0.890291	8.01566	1.0293	4.23785	9.26372	2.18102	78.1703	66.5453	75.1391	143.184	64.4735	76.1083	341.147	157.483	163.358	4.11721	117.187	53.2362	49.3883	174.481	10.9051	656.64	6.06587	139.473	4.03336	77.1393	22.9914	4.52302	8.8615e-14	9.6321e-11
ENSG00000258376.2_3	AC004846.1	chr14	73709359	73712687	-	as_lncRNA	31.3968	24.8044	35.6116	42.0822	51.4651	34.9623	39.1135	34.8962	7.49578	11.0909	7.20512	5.46505	6.9433	9.75748	4.23785	6.17581	4.53773	17.4981	17.9476	14.4181	20.2043	6.54305	5.45254	3.36739	36.7915	9.27126	35.287	7.07421	0.252371	-1.98638	9.85799e-14	1.03809e-10
ENSG00000173267.13_3	SNCG	chr10	88718375	88723017	+	protein_coding_gene	680.774	347.261	708.672	413.808	657.724	306.185	508.475	500.543	180.97	93.1634	99.8423	64.4876	156.72	128.799	10.5946	34.9963	51.0495	131.751	96.0723	68.7634	104.389	174.481	93.7837	39.2862	515.43	95.5718	504.509	94.928	0.185455	-2.43086	1.0043e-13	1.03809e-10
ENSG00000279141.3_2	LINC01451	chr9	139506476	139511633	-	lncRNA	33.6941	20.0343	27.599	9.01761	33.967	15.8919	19.5567	9.81457	6.42496	2.21818	1.0293	6.55806	6.9433	4.87874	3.17839	1.0293	2.26887	5.14651	4.22296	3.32726	5.61231	2.18102	2.18102	1.12246	21.1969	3.64516	19.7955	3.25283	0.171651	-2.54245	1.01122e-13	1.03809e-10
ENSG00000221818.8_3	EBF2	chr8	25699246	25902913	-	protein_coding_gene	187.615	94.4474	40.9534	203.397	76.1684	55.0921	57.6409	125.408	642.496	360.453	1977.29	597.877	1765.58	607.891	2742.95	1043.71	352.809	599.054	1482.26	487.999	301.942	1200.65	101.417	990.012	105.09	953.399	85.3079	625.193	9.06922	3.18098	1.07839e-13	1.08692e-10
ENSG00000260209.1_3	AP000842.3	chr11	125742926	125744423	-	lncRNA	1.53155	17.1723	14.2447	5.00979	16.4688	12.7136	15.4395	5.45254	109.224	47.6908	49.4065	52.4645	63.4816	101.478	42.3785	28.8205	66.9316	27.7912	91.8493	97.5997	69.5926	28.3532	145.038	56.1231	11.0041	67.3889	13.4791	59.8023	6.15283	2.62125	1.14082e-13	1.12931e-10
ENSG00000224594.2_3	AC041040.1	chr8	49297150	49297609	+	pseudogene	14.5497	8.58613	23.1476	22.0431	14.4102	15.8919	15.4395	21.8102	3.21248	2.21818	2.0586	3.27903	3.9676	3.90299	2.11893	1.0293	1.13443	4.11721	7.39017	3.32726	4.48985	8.72406	3.27152	1.12246	16.9848	3.46026	15.6657	3.27528	0.204441	-2.29024	1.19865e-13	1.16574e-10
ENSG00000203635.2_3	AC144450.1	chr2	1624282	1629191	-	lncRNA	13.784	115.436	16.9155	72.1409	17.4981	68.8651	44.26	23.9912	1007.65	844.016	3917.52	1555.35	694.33	1348.48	428.023	593.907	377.766	87.4907	423.351	98.7088	574.701	407.85	22.9007	850.826	46.6113	827.055	34.1256	584.304	17.7519	4.1499	1.38923e-13	1.27783e-10
ENSG00000273294.1_3	C1QTNF3-AMACR	chr5	33987279	34124633	-	protein_coding_gene	2972.74	6198.23	6406.53	19278.7	8083.11	5995.5	4775.96	5548.5	39474.9	153388	49723.5	176697	60471.2	30212.1	106517	188566	370430	13434.5	37662.4	47223.8	22260.7	58967	17432.9	45085.9	7407.4	88596.7	6096.87	48473.7	11.9606	3.58022	1.38726e-13	1.27783e-10
ENSG00000132470.13_3	ITGB4	chr17	73717408	73753899	+	protein_coding_gene	1840.16	1047.51	1012.26	548.071	788.446	1030.86	1251.63	964.009	398.347	219.599	179.099	263.415	405.687	404.935	243.677	134.839	124.788	483.772	344.171	281.708	246.942	190.839	154.852	84.1847	1060.37	260.053	1021.56	245.309	0.245279	-2.0275	1.4061e-13	1.27783e-10
ENSG00000069011.15_3	PITX1	chr5	134363425	134370503	-	protein_coding_gene	444.15	199.389	281.332	156.305	224.388	316.779	138.956	163.576	44.9747	47.6908	38.0842	69.9527	57.5302	44.8844	75.2219	13.3809	35.1674	52.4944	105.574	59.8907	88.6745	26.1722	37.0773	13.4695	240.609	50.64	211.888	46.3327	0.210357	-2.24909	1.35907e-13	1.27783e-10
ENSG00000166840.13_3	GLYATL1	chr11	58672871	58811000	+	protein_coding_gene	577.394	875.785	1900.77	1395.73	538.325	1157.99	1513.07	1231.18	11677.4	9115.59	11197.8	8863.22	5642.92	7434.22	4849.16	7058.95	4917.77	5260.76	8135.53	1532.76	2698.4	3175.56	1389.31	9317.56	1148.78	6391.68	1194.59	6350.94	5.56401	2.47613	1.50072e-13	1.34181e-10
ENSG00000168060.15_3	NAALADL1	chr11	64812290	64826021	-	protein_coding_gene	134.776	134.516	183.4	188.368	143.073	154.682	226.446	147.219	66.3912	51.018	42.2014	44.8134	72.4087	71.2296	20.1298	39.1135	55.5872	79.2563	46.4525	76.5271	89.797	61.0684	27.2627	33.6739	164.06	54.8082	150.95	53.3026	0.33423	-1.58109	1.54361e-13	1.35826e-10
ENSG00000249601.2_2	LINC01187	chr5	169618583	169626145	-	lncRNA	98.785	92.5394	148.679	7.0137	7.20512	185.406	45.2893	62.1589	11.7791	6.65453	1.0293	14.2091	3.9676	4.87874	1.05946	3.08791	4.53773	13.3809	3.16722	12.2	1.12246	2.18102	2.18102	1.12246	80.8845	5.40991	77.3491	3.56741	0.0668505	-3.90292	2.76093e-13	2.39144e-10
ENSG00000196878.14_3	LAMB3	chr1	209788215	209825811	-	protein_coding_gene	5684.35	1185.84	1793.94	1036.02	2019.49	860.284	817.266	727.369	425.118	176.345	113.223	288.555	456.274	244.913	83.6976	172.923	99.8301	403.486	440.243	258.417	175.104	116.684	217.011	40.4086	1765.57	232.015	1110.93	196.678	0.131413	-2.92782	2.89839e-13	2.47188e-10
ENSG00000282413.1_3	AL133461.1	chr10	121578378	121578645	+	pseudogene	38.2888	33.3905	54.3077	24.047	31.9084	24.3677	40.1428	34.8962	17.1332	13.3091	9.26372	2.18602	14.8785	10.7332	5.29732	6.17581	6.8066	10.293	9.50165	18.8545	5.61231	10.9051	4.36203	5.61231	35.1686	9.43277	34.1434	9.38269	0.268146	-1.89891	3.12036e-13	2.62087e-10
ENSG00000163362.10_4	INAVA	chr1	200860176	200884863	+	protein_coding_gene	697.621	300.514	457.609	131.256	291.293	361.277	301.586	227.916	53.5413	58.7816	27.7912	89.6269	96.2143	118.065	55.0921	57.6409	30.6297	113.223	60.1771	97.5997	40.4086	70.883	16.3576	12.3471	346.134	62.3987	301.05	58.2113	0.180328	-2.4713	3.35342e-13	2.77458e-10
ENSG00000128050.8_3	PAICS	chr4	57301907	57330745	+	protein_coding_gene	1932.82	2588.24	2773.26	2842.55	1787.9	2546.95	2509.44	2271.53	5612.2	3936.15	5671.46	5082.5	3218.72	3963.49	5170.18	5379.13	4597.86	5501.62	4983.09	4823.42	3258.51	3263.89	5635.74	5580.88	2406.58	4729.93	2528.19	5032.79	1.96545	0.97486	3.41815e-13	2.78655e-10
ENSG00000166743.9_3	ACSM1	chr16	20634559	20710212	-	protein_coding_gene	342.301	1642.81	629.436	2767.41	1108.56	771.289	252.179	814.609	10146.1	17147.6	20334.9	21039.4	32066.1	3509.76	7038.01	21192.3	10228	590.819	31725	398.162	18989.8	19009.7	3983.62	39865.4	1041.07	16079	792.949	18068.7	15.445	3.94907	3.66053e-13	2.94089e-10
ENSG00000144355.14_3	DLX1	chr2	172949468	172954405	+	protein_coding_gene	8.42353	5.72408	0.890291	63.1233	1.0293	9.53517	3.08791	4.36203	207.74	128.654	420.985	397.856	333.278	615.697	22.2487	659.783	174.703	9.26372	5.2787	332.726	661.13	604.141	558.34	354.698	12.022	342.908	5.04306	343.988	28.546	4.83522	3.92192e-13	3.06213e-10
ENSG00000142973.13_3	CYP4B1	chr1	47223510	47285085	+	protein_coding_gene	2076.78	977.864	971.307	323.632	1165.17	708.781	482.743	777.532	165.978	82.0725	33.967	122.417	291.619	98.5505	18.0109	51.4651	74.8726	254.238	161.528	106.472	41.5311	27.2627	26.1722	22.4492	935.476	98.6629	874.42	78.4725	0.105496	-3.24474	3.87787e-13	3.06213e-10
ENSG00000158104.11_3	HPD	chr12	122277433	122301502	-	protein_coding_gene	53.6043	15.2642	48.966	24.047	50.4358	16.9514	44.26	39.2583	12.8499	13.3091	5.14651	5.46505	5.9514	9.75748	12.7136	6.17581	5.67217	13.3809	4.22296	2.21818	12.3471	4.36203	3.27152	7.85723	36.5984	7.7938	41.7591	6.06361	0.21264	-2.23351	4.32229e-13	3.32786e-10
ENSG00000228983.9_2	SLC47A1P1	chr17	19483256	19499371	+	pseudogene	71.2171	43.8846	40.9534	40.0783	57.6409	27.546	42.2014	42.5298	20.3457	19.9636	13.3809	18.5812	15.8704	13.6605	5.29732	4.11721	6.8066	14.4102	7.39017	14.4181	8.9797	10.9051	2.18102	4.48985	45.7564	11.2998	42.3656	12.143	0.246748	-2.01889	4.58254e-13	3.4799e-10
ENSG00000019549.9_3	SNAI2	chr8	49830327	49834299	-	protein_coding_gene	1713.8	696.43	719.355	1322.58	1760.11	719.375	872.848	802.614	372.648	341.599	211.007	231.718	191.437	155.144	150.444	109.106	187.181	521.856	437.076	393.726	130.206	243.183	163.576	104.389	1075.89	246.518	837.731	201.222	0.229119	-2.12583	5.33644e-13	3.99764e-10
ENSG00000255545.7_3	AP004608.1	chr11	134306367	134375555	+	lncRNA	68.154	641.097	105.054	300.587	400.399	180.109	286.146	173.391	2211.26	895.034	5821.73	1690.89	2925.11	2657.94	4682.83	2805.88	258.651	3156.87	7214.92	561.198	441.128	2240.99	2480.91	2065.33	269.367	2631.92	233.127	2360.95	9.77208	3.28867	5.72409e-13	4.22901e-10
ENSG00000165410.14_3	CFL2	chr14	35175975	35184029	-	protein_coding_gene	3919.24	5034.33	6264.98	5326.4	6175.81	4894.72	4139.85	3994.53	2940.49	2494.34	1752.9	1810.03	2196.07	1960.28	1244.87	1281.48	2077.15	3015.86	2629.85	2573.08	2090.02	1581.24	1089.42	1644.41	4968.73	2023.84	4964.53	2018.71	0.407317	-1.29578	5.79787e-13	4.22901e-10
ENSG00000197956.9_3	S100A6	chr1	153507075	153508720	-	protein_coding_gene	14224.3	5793.73	6540.97	4195.19	4775.96	4512.25	5643.66	4677.19	2427.56	1814.47	1048.86	1314.89	1554.31	2509.62	746.921	949.017	1241.07	1398.82	1064.19	2315.78	3316.88	1381.67	847.325	764.397	6295.4	1543.49	5209.81	1348.28	0.245168	-2.02816	6.01606e-13	4.33117e-10
ENSG00000283175.1_3	AC007920.2	chr3	187009060	187015721	+	as_lncRNA	163.876	152.642	227.024	186.364	393.193	187.525	155.425	231.188	84.5953	68.7634	28.8205	34.9763	92.2467	60.4964	14.8325	30.8791	47.6462	103.96	67.5673	49.9089	71.8376	43.6203	32.7152	41.5311	212.155	54.6498	186.944	48.7776	0.257772	-1.95583	6.17268e-13	4.38696e-10
ENSG00000107731.12_3	UNC5B	chr10	72972327	73062621	+	protein_coding_gene	1542.27	727.913	1509.04	762.489	1403.97	602.835	873.878	1182.11	295.548	262.854	212.036	202.207	613.986	395.178	372.931	235.71	222.349	475.538	386.401	365.999	363.678	317.338	352.234	113.369	1075.56	324.21	1027.99	334.786	0.301455	-1.72999	7.29839e-13	5.05733e-10
ENSG00000217643.1_2	PTGES3P2	chr2	26045338	26045819	+	pseudogene	9.1893	22.8963	23.1476	23.045	16.4688	15.8919	19.5567	15.2671	9.63744	6.65453	5.14651	5.46505	3.9676	4.87874	3.17839	3.08791	4.53773	3.08791	3.16722	5.54544	6.73477	3.27152	1.09051	4.48985	18.1829	4.62132	18.0128	4.51379	0.254241	-1.97573	7.23906e-13	5.05733e-10
ENSG00000152661.7_3	GJA1	chr6	121756838	121770873	+	protein_coding_gene	12741.7	4356.03	9506.53	5809.35	5399.72	5650.12	5307.08	10353.3	2982.25	1894.32	1021.07	1565.19	2944.95	1715.36	466.164	1153.85	1683.5	2510.47	2749.14	2446.65	2562.58	1512.53	1456.92	936.133	7390.48	1850.07	5729.73	1699.43	0.250329	-1.9981	7.42106e-13	5.07884e-10
ENSG00000228613.1_4	AC141930.1	chr2	1550437	1623885	-	as_lncRNA	98.785	476.053	103.274	288.564	113.223	262.747	171.893	59.9779	2123.45	2650.72	10070.7	2260.35	2788.23	2311.55	1094.43	2812.05	1359.05	483.772	2395.47	298.345	1485.02	1059.97	131.951	3397.69	196.815	2295.17	142.558	2191.9	11.6622	3.54377	8.00764e-13	5.34824e-10
ENSG00000147255.18_3	IGSF1	chrX	130407480	130712873	-	protein_coding_gene	245.048	76.3211	64.9912	217.425	5786.74	101.708	132.78	95.9647	80.312	64.3271	48.3772	28.4183	65.4654	28.2967	18.0109	30.8791	15.8821	31.9084	57.0099	34.3817	29.184	19.6291	25.0817	56.1231	840.122	39.5804	117.244	31.3937	0.0471191	-4.40755	7.92689e-13	5.34824e-10
ENSG00000234949.2_3	AC104667.2	chr2	238499663	238504624	+	as_lncRNA	19.1444	30.5284	16.0252	44.0861	4.11721	36.0217	43.2307	33.8057	363.01	201.854	136.897	157.393	62.4897	365.905	441.796	338.64	81.6792	28.8205	83.4034	199.636	276.126	480.914	105.779	297.452	28.3699	226.362	32.1671	200.745	7.99006	2.99821	9.0524e-13	5.83511e-10
ENSG00000125170.10_3	DOK4	chr16	57505834	57521239	-	protein_coding_gene	473.249	506.581	1100.4	411.804	347.904	666.402	778.152	737.183	223.803	148.618	168.806	183.626	229.129	252.719	224.606	71.0219	119.115	267.619	261.823	174.127	237.962	256.269	264.993	120.103	627.71	200.271	586.492	224.204	0.319096	-1.64794	9.01233e-13	5.83511e-10
ENSG00000167191.11_3	GPRC5B	chr16	19868013	19897489	-	protein_coding_gene	1333.98	789.924	1170.73	1275.49	1495.58	980.003	800.797	1778.62	346.948	281.708	193.509	241.555	597.124	298.579	108.065	148.22	184.913	497.153	536.315	159.709	268.268	248.636	355.506	90.9194	1203.14	284.82	1223.11	258.452	0.236775	-2.07841	8.87705e-13	5.83511e-10
ENSG00000136840.18_3	ST6GALNAC4	chr9	130670165	130679317	-	protein_coding_gene	224.372	130.7	170.936	113.221	125.575	121.838	213.066	196.291	57.8246	52.1271	43.2307	31.6973	64.4735	81.9628	31.7839	49.4065	40.8396	81.3149	65.4558	70.9816	80.8173	66.521	61.0684	22.4492	162	56.3721	150.818	59.4465	0.348026	-1.52273	9.58041e-13	6.10448e-10
ENSG00000159556.9_3	ISL2	chr15	76629065	76634817	+	protein_coding_gene	68.154	70.597	85.4679	43.0842	61.7581	27.546	33.967	32.7152	5.35413	7.76361	8.23442	7.65107	12.8947	18.5392	3.17839	7.20512	3.4033	21.6153	3.16722	9.98179	8.9797	11.9956	21.8102	1.12246	52.9112	9.55601	52.4211	7.99902	0.180925	-2.46654	1.04868e-12	6.56233e-10
ENSG00000140279.12_3	DUOX2	chr15	45384848	45406542	-	protein_coding_gene	2130.39	111.62	127.312	208.407	79.2563	134.552	53.5237	101.417	18.204	4.43635	67.9339	17.4882	34.7165	9.75748	9.53517	12.3516	4.53773	47.3479	35.8951	13.3091	7.85723	6.54305	14.1766	3.36739	368.309	19.2161	119.466	12.8303	0.0522147	-4.2594	1.05357e-12	6.56233e-10
ENSG00000140254.12_3	DUOXA1	chr15	45409565	45422136	-	protein_coding_gene	578.926	411.18	1092.39	480.939	429.219	515.959	325.26	577.969	115.649	54.3453	41.1721	73.2317	172.591	56.5934	5.29732	15.4395	34.033	124.546	145.692	52.1271	17.9594	17.4481	51.2539	12.3471	551.48	61.8578	498.449	51.6905	0.11222	-3.15559	1.08318e-12	6.67177e-10
ENSG00000264831.1	MIR4260	chr1	209796789	209796855	-	miRNA	167.705	46.7467	79.2359	33.0646	65.8753	25.4271	23.674	21.8102	8.56661	8.8727	4.11721	12.0231	9.919	7.80598	2.11893	3.08791	3.4033	11.3223	15.8361	14.4181	11.2246	3.27152	9.81457	1.12246	57.9423	7.93278	39.9056	8.71966	0.136492	-2.87311	1.16113e-12	7.07331e-10
ENSG00000147117.7_3	ZNF157	chrX	47229982	47273704	+	protein_coding_gene	39.0545	53.4248	51.6369	33.0646	47.3479	27.546	36.0256	40.3488	24.629	8.8727	16.4688	9.83709	18.8461	16.5877	5.29732	11.3223	9.07546	19.5567	8.44591	16.6363	15.7145	14.1766	5.45254	6.73477	41.0561	12.9784	39.7017	12.7495	0.316794	-1.65839	1.23471e-12	7.4398e-10
ENSG00000280927.1_3	CTBP1-AS	chr4	1203908	1212379	+	as_lncRNA	22.9733	77.2751	40.9534	288.564	36.0256	29.665	60.7288	7.63355	53.5413	497.98	1561.45	628.481	243.015	759.132	384.585	1158.99	663.643	703.013	1211.99	801.87	310.922	593.236	1031.62	1688.18	70.4773	768.229	38.4895	683.328	10.9027	3.44661	1.28201e-12	7.64176e-10
ENSG00000173457.10_3	PPP1R14B	chr11	64011952	64014413	-	protein_coding_gene	160.813	180.309	178.058	207.405	101.901	219.309	260.413	194.11	502.218	432.544	489.948	326.81	323.359	751.326	644.154	793.592	372.094	314.966	363.174	414.799	799.193	784.075	715.373	529.802	187.79	534.839	187.21	496.083	2.84895	1.51043	1.3167e-12	7.76504e-10
ENSG00000188910.7_3	GJB3	chr1	35246790	35251970	+	protein_coding_gene	573.566	81.0912	105.054	39.0763	54.553	56.1515	46.3186	59.9779	14.9916	3.32726	11.3223	14.2091	15.8704	16.5877	4.23785	14.4102	13.6132	25.7326	15.8361	33.2726	14.592	4.36203	7.63355	5.61231	126.974	13.4757	58.0647	14.3097	0.106015	-3.23765	1.35301e-12	7.89515e-10
ENSG00000239713.8_3	APOBEC3G	chr22	39473010	39483748	+	protein_coding_gene	391.311	711.694	863.582	561.096	505.387	473.58	635.079	812.428	232.369	219.599	88.52	172.696	292.61	256.622	85.8165	160.571	121.384	250.12	97.128	252.872	148.165	95.9647	99.2362	53.8782	619.27	164.222	598.088	154.368	0.265276	-1.91444	1.42098e-12	8.20544e-10
ENSG00000254244.1_2	PAICSP4	chr8	4644854	4646106	+	pseudogene	567.439	821.406	854.679	887.734	483.772	800.954	784.328	709.921	1875.02	1314.27	1774.52	1678.86	907.588	1273.35	1706.8	1869.21	1491.78	1397.79	1490.7	1649.21	1168.48	1062.15	1750.26	1980.02	738.779	1524.38	792.641	1570.5	2.06348	1.04508	1.44154e-12	8.23834e-10
ENSG00000259344.1	RP11-566K19.6	chr15	23095170	23115256	-	pseudogene	75.8117	42.9306	2416.25	81.1585	106.018	367.634	250.12	415.483	44.9747	28.8363	19.5567	12.0231	130.931	33.1754	6.35678	22.6446	29.4953	34.9963	35.8951	28.8363	26.9391	20.7196	25.0817	15.7145	469.426	32.261	178.069	27.8877	0.0687662	-3.86216	1.6429e-12	9.29327e-10
ENSG00000224884.1_4	AC034187.1	chr3	8615412	8634810	-	lncRNA	34.4599	54.3788	27.599	39.0763	111.165	50.8542	14.4102	14.1766	16.0624	11.0909	4.11721	3.27903	9.919	6.83023	1.05946	3.08791	5.67217	10.293	5.2787	8.8727	2.24492	2.18102	2.18102	4.48985	43.265	6.04122	36.7681	4.88427	0.139925	-2.83728	1.73269e-12	9.70218e-10
ENSG00000284526.1_2	AC015802.6	chr17	74559792	74566626	-	protein_coding_gene	362.977	172.677	305.37	106.207	186.304	188.584	195.567	130.861	62.1079	24.3999	50.4358	51.3715	81.3358	38.0542	10.5946	25.7326	15.8821	71.0219	63.3443	47.6908	42.6536	32.7152	31.6247	6.73477	206.068	40.9812	187.444	40.3539	0.198947	-2.32955	1.76216e-12	9.76855e-10
ENSG00000176928.5_3	GCNT4	chr5	74321171	74326724	-	protein_coding_gene	734.378	380.652	508.356	362.708	514.651	466.164	266.589	610.684	194.89	129.763	100.872	159.58	188.461	129.774	24.3677	89.5493	125.922	203.802	149.915	154.163	134.695	118.865	47.9823	66.2253	480.523	126.177	487.26	129.769	0.262582	-1.92916	1.81066e-12	9.93803e-10
ENSG00000175906.4_3	ARL4D	chr17	41476327	41478505	+	protein_coding_gene	1196.91	192.711	225.244	148.29	124.546	218.249	199.685	347.872	96.3744	46.5817	52.4944	51.3715	68.4411	67.3266	65.6867	34.9963	32.8986	72.0512	92.905	60.9998	48.2659	75.245	20.7196	14.592	331.688	56.3094	208.967	56.7471	0.169717	-2.5588	2.01684e-12	1.09611e-09
ENSG00000095303.14_4	PTGS1	chr9	125132809	125157982	+	protein_coding_gene	1696.19	495.133	583.141	388.759	3039.53	243.677	362.314	468.918	94.2327	136.418	129.692	120.231	234.088	214.664	147.265	78.227	162.224	215.124	152.026	167.472	190.819	237.731	171.21	68.4702	909.708	157.493	482.026	157.125	0.173127	-2.5301	2.72587e-12	1.46708e-09
ENSG00000211695.2_3	TRGV9	chr7	38356618	38358462	-	protein_coding_gene	114.1	1269.79	308.931	1104.16	115.282	555.159	225.417	199.563	3807.86	3349.44	5876.29	2035.19	970.078	4042.52	19994.2	12004.8	2285.88	2890.28	7267.71	2086.19	1572.57	30970.4	2342.41	10323.3	486.55	6988.69	267.174	3578.65	14.3641	3.84439	3.19144e-12	1.70113e-09
ENSG00000142227.10_3	EMP3	chr19	48824766	48833810	+	protein_coding_gene	615.683	282.388	280.442	319.624	381.871	228.844	361.285	340.238	137.066	116.454	129.692	64.4876	150.769	191.247	134.552	156.454	125.922	154.395	146.748	147.509	157.145	130.861	98.1457	47.1434	351.297	130.537	329.931	135.809	0.371561	-1.42833	3.2857e-12	1.73469e-09
ENSG00000088727.12_3	KIF9	chr3	47269516	47324941	-	protein_coding_gene	232.796	262.354	194.083	276.54	153.366	192.822	200.714	206.106	549.334	481.344	484.801	401.135	448.339	632.284	709.84	731.834	398.186	313.937	270.269	379.308	480.414	527.806	461.285	427.658	214.848	481.111	203.41	470.849	2.23886	1.16276	3.48419e-12	1.78839e-09
ENSG00000107736.19_3	CDH23	chr10	73156691	73575704	+	protein_coding_gene	852.308	499.903	217.231	278.544	638.167	121.838	249.091	368.592	108.153	144.181	80.2856	99.4639	137.874	180.513	134.552	121.458	68.066	133.809	98.1837	72.0907	77.4499	59.9779	88.3311	59.4905	403.209	103.993	323.568	98.8238	0.257936	-1.95492	3.48331e-12	1.78839e-09
ENSG00000250786.1_2	SNHG18	chr5	9546312	9550721	+	lncRNA	403.563	683.074	1006.03	558.09	327.318	969.409	674.193	1032.71	253.786	74.3089	29.8498	131.161	200.364	124.896	18.0109	37.0549	136.132	176.011	131.967	112.018	99.8991	28.3532	45.8013	21.3268	706.798	101.309	678.633	105.958	0.143365	-2.80224	3.44768e-12	1.78839e-09
ENSG00000138356.13_3	AOX1	chr2	201450591	201541787	+	protein_coding_gene	5900.3	5526.6	11595.1	1707.33	2769.85	5123.56	2830.58	34608.4	1518.43	1104.65	776.094	683.131	2563.07	748.398	250.033	680.369	557.007	2060.66	1582.55	489.108	437.76	446.018	586.693	251.431	8757.72	920.963	5325.08	681.75	0.105165	-3.24928	3.89874e-12	1.98281e-09
ENSG00000126458.3_3	RRAS	chr19	50138549	50143458	-	protein_coding_gene	812.487	685.936	837.764	755.476	682.427	822.143	828.588	581.241	335.169	295.017	309.82	184.719	284.675	346.39	354.92	227.476	218.946	343.787	528.925	239.563	511.843	451.47	231.188	332.249	750.758	324.76	783.982	321.034	0.432543	-1.20909	3.96962e-12	2.00051e-09
ENSG00000186007.9_3	LEMD1	chr1	205350506	205426219	-	protein_coding_gene	106.443	82.0452	154.02	28.0548	50.4358	59.3299	109.106	124.318	32.1248	24.3999	5.14651	10.9301	12.8947	15.612	9.53517	14.4102	20.4198	39.1135	12.6689	38.8181	20.2043	11.9956	20.7196	7.85723	89.2191	18.5531	94.244	15.0111	0.207676	-2.26759	4.61168e-12	2.30221e-09
ENSG00000141744.3_3	PNMT	chr17	37824234	37826728	+	protein_coding_gene	43.6492	5.72408	12.4641	58.1135	46.3186	6.35678	5.14651	107.96	6.42496	5.54544	5.14651	2.18602	0.9919	3.90299	3.17839	3.08791	1.13443	1.0293	3.16722	5.54544	2.24492	2.18102	3.27152	1.12246	35.7166	3.13503	28.0566	3.12756	0.0878873	-3.5082	4.69288e-12	2.30221e-09
ENSG00000244067.2_3	GSTA2	chr6	52614887	52628367	-	protein_coding_gene	27.5679	12.4022	373.032	19.0372	6.17581	201.298	104.989	625.951	47.1164	5.54544	1.0293	5.46505	4.9595	4.87874	2.11893	1.0293	6.8066	7.20512	3.16722	5.54544	3.36739	3.27152	1.09051	4.48985	171.307	6.69289	66.2784	4.68429	0.039065	-4.67798	4.66346e-12	2.30221e-09
ENSG00000108830.9_3	RND2	chr17	41177258	41184053	+	protein_coding_gene	219.012	221.331	304.479	185.362	205.86	245.795	356.139	226.826	141.349	45.4726	42.2014	60.1156	91.2548	57.5691	10.5946	17.4981	35.1674	73.0805	55.9542	66.5453	68.4702	62.1589	70.883	20.2043	245.601	57.4074	224.078	58.8423	0.233799	-2.09666	4.77383e-12	2.32138e-09
ENSG00000121316.10_3	PLBD1	chr12	14656595	14721283	-	protein_coding_gene	939.606	455.065	1803.73	521.018	497.153	818.965	784.328	707.74	250.573	258.417	203.802	249.206	352.124	321.997	351.742	311.879	265.457	288.205	282.938	321.635	405.209	318.428	227.916	125.716	815.95	283.453	746.034	285.571	0.34734	-1.52558	5.1251e-12	2.47052e-09
ENSG00000234753.5_3	FOXP4-AS1	chr6	41462591	41516359	-	as_lncRNA	70.4513	69.643	65.8815	112.219	110.135	65.6867	128.663	55.6159	201.315	224.036	408.633	155.207	317.408	330.778	240.498	270.706	262.054	337.611	168.918	196.309	142.553	213.74	280.26	117.859	84.787	241.743	70.0472	232.267	2.854	1.51298	5.2588e-12	2.51312e-09
ENSG00000129965.14_4	INS-IGF2	chr11	2152625	2182439	-	protein_coding_gene	549.827	70.597	89.0291	167.327	186.304	42.3785	93.6665	89.4216	40.6914	22.1818	39.1135	25.1392	34.7165	23.4179	32.8434	20.586	38.5707	21.6153	43.2853	9.98179	17.9594	45.8013	11.9956	13.4695	161.069	27.5855	91.5441	24.2786	0.171106	-2.54704	5.47085e-12	2.59211e-09
ENSG00000169562.9_3	GJB1	chrX	70435044	70445366	+	protein_coding_gene	366.041	509.443	437.133	802.568	331.435	612.37	693.75	179.934	3049.71	2652.94	3878.41	3166.45	1784.43	4451.36	6776.33	2685.45	429.95	1074.59	2204.38	1561.6	3606.47	5786.23	589.965	2656.87	491.584	2897.2	473.288	2671.16	5.89375	2.55919	5.77994e-12	2.71534e-09
ENSG00000163141.18_3	BNIPL	chr1	151009046	151020076	+	protein_coding_gene	547.529	1254.53	260.855	695.358	661.841	540.326	195.567	495.091	248.432	32.1635	48.3772	86.3478	118.036	98.5505	85.8165	39.1135	36.3019	276.882	100.295	46.5817	107.756	64.34	50.1634	114.491	581.387	97.103	543.928	86.0822	0.167059	-2.58157	5.8508e-12	2.72554e-09
ENSG00000123500.9_3	COL10A1	chr6	116440086	116479910	-	protein_coding_gene	19.9102	17.1723	24.9281	24.047	16.4688	84.757	74.1098	13.0861	49.258	73.1998	48.3772	163.952	647.711	355.172	786.122	410.692	906.412	64.846	259.712	273.945	2281.97	1018.53	185.386	526.435	34.3099	503.232	21.9786	314.558	14.6797	3.87575	6.50368e-12	3.00443e-09
ENSG00000248663.6_2	LINC00992	chr5	116751205	116881993	+	lncRNA	222.841	237.549	710.452	478.935	96.7544	424.845	172.923	121.046	1840.75	654.362	2299.46	1697.45	1587.04	1629.5	1795.79	2631.93	1455.48	1466.76	1299.61	1133.49	1167.36	347.872	2785.16	846.336	308.168	1539.9	230.195	1526.9	4.99611	2.32081	7.35863e-12	3.37128e-09
ENSG00000123689.5_3	G0S2	chr1	209848765	209849733	+	protein_coding_gene	3949.87	268.078	291.125	434.849	200.714	190.703	322.172	502.724	179.899	102.036	123.516	91.8129	68.4411	108.308	93.2328	84.4028	120.25	94.6958	106.63	149.727	63.9803	112.322	97.0552	66.2253	770.029	103.908	306.648	99.5456	0.134891	-2.89013	7.88863e-12	3.58448e-09
ENSG00000261373.1_3	VPS9D1-AS1	chr16	89778264	89784573	+	as_lncRNA	22.2075	30.5284	40.0631	19.0372	9.26372	23.3082	59.6995	18.5386	87.8078	64.3271	151.307	45.9064	157.712	81.9628	262.747	102.93	142.939	133.809	96.0723	82.0725	66.2253	136.313	154.852	86.4296	27.8308	115.838	22.7578	99.5012	4.16071	2.05683	8.05178e-12	3.62886e-09
ENSG00000128268.11_3	MGAT3	chr22	39853349	39888199	+	protein_coding_gene	87.2984	98.2634	79.2359	52.1018	69.9926	41.3191	103.96	78.5166	10.7083	16.6363	21.6153	8.74408	24.7975	37.0784	10.5946	25.7326	23.8231	24.7033	39.0623	24.3999	33.6739	27.2627	25.0817	6.73477	76.3359	22.5405	78.8762	24.5516	0.295517	-1.75869	8.2463e-12	3.68656e-09
ENSG00000245750.7_2	DRAIC	chr15	69755365	69863779	+	lncRNA	359.914	709.786	620.533	501.98	261.443	627.202	444.659	496.181	4610.98	961.579	3759.01	5180.87	2035.38	2883.33	1180.24	995.335	2493.48	1923.77	846.703	1889.89	2110.23	1209.37	1546.34	1321.14	502.712	2184.23	499.081	1906.83	4.34499	2.11935	8.33853e-12	3.69797e-09
ENSG00000227145.1_3	IL21-AS1	chr4	123540138	123610311	+	as_lncRNA	92.6588	34.3445	144.227	40.0783	21.6153	79.4597	77.1977	99.2362	29.9831	17.7454	6.17581	7.65107	27.7732	16.5877	25.4271	9.26372	6.8066	22.6446	8.44591	13.3091	5.61231	7.63355	11.9956	8.9797	73.6022	14.1272	78.3287	10.6297	0.192232	-2.37908	9.39968e-12	4.13549e-09
ENSG00000187908.16_3	DMBT1	chr10	124320181	124403252	+	protein_coding_gene	679.243	43.8846	106.835	13.0254	18.5274	58.2705	24.7033	207.196	32.1248	14.4181	4.11721	13.1161	15.8704	8.78173	2.11893	11.3223	3.4033	11.3223	17.9476	11.0909	5.61231	8.72406	5.45254	5.61231	143.961	10.6897	51.0776	9.9363	0.0742252	-3.75195	9.54232e-12	4.16518e-09
ENSG00000198885.9_4	ITPRIPL1	chr2	96991069	96996255	+	protein_coding_gene	141.668	176.493	176.278	163.319	130.721	137.73	184.245	185.386	38.5497	84.2907	16.4688	69.9527	55.5464	45.8601	16.9514	37.0549	18.1509	43.2307	46.4525	64.3271	22.4492	26.1722	23.9912	5.61231	161.98	38.4413	169.798	37.8023	0.237417	-2.0745	1.08274e-11	4.68919e-09
ENSG00000278041.1_3	AL133325.3	chr20	21479899	21483572	-	lncRNA	0.765775	3.81606	2.67087	1.00196	1.0293	2.11893	1.0293	1.09051	9.63744	45.4726	66.9046	17.4882	18.8461	65.3751	20.1298	7.20512	14.7476	40.1428	7.39017	13.3091	16.8369	9.81457	28.3532	6.73477	1.69034	24.2743	1.0599	17.1625	14.3638	3.84436	1.11498e-11	4.79138e-09
ENSG00000119547.5_3	ONECUT2	chr18	55102917	55158529	+	protein_coding_gene	98.785	70.597	347.213	115.225	47.3479	113.363	76.1684	66.521	311.61	1256.6	174.981	2780.62	834.188	2206.17	1075.36	378.783	2137.27	1568.66	174.197	2121.68	572.456	714.283	4888.75	145.92	116.903	1333.84	87.4767	954.771	11.4057	3.51169	1.18374e-11	5.0092e-09
ENSG00000177191.2_3	B3GNT8	chr19	41931264	41934635	-	protein_coding_gene	79.6406	39.1146	83.6873	24.047	34.9963	61.4489	53.5237	99.2362	14.9916	4.43635	7.20512	13.1161	21.8218	10.7332	12.7136	8.23442	18.1509	19.5567	16.8918	9.98179	14.592	22.9007	31.6247	5.61231	59.4618	14.5352	57.4863	13.8541	0.24434	-2.03304	1.17753e-11	5.0092e-09
ENSG00000165795.23_3	NDRG2	chr14	21484922	21539031	-	protein_coding_gene	4055.55	3313.29	7388.52	3496.83	2296.37	3807.71	4735.82	6070.86	2495.03	1104.65	1288.69	1071.15	1838.98	1452.89	1569.06	812.119	779.356	1793.04	2038.63	1631.47	829.499	1842.96	929.113	645.416	4395.62	1382.63	3931.63	1370.79	0.314556	-1.66861	1.21228e-11	5.09112e-09
ENSG00000105971.14_3	CAV2	chr7	115927434	116148595	+	protein_coding_gene	3805.9	1893.72	2428.71	1851.62	2788.38	1930.34	1774.52	2073.06	1193.97	867.307	452.893	708.271	977.021	815.725	262.747	537.296	536.587	1023.13	1007.18	902.797	873.275	697.925	500.543	254.799	2318.28	725.716	2001.7	761.998	0.313033	-1.67561	1.26998e-11	5.25381e-09
ENSG00000258837.1_3	AL133370.1	chr14	68591721	68596913	-	as_lncRNA	290.995	170.768	129.982	12.0235	72.0512	152.563	98.813	32.7152	5.35413	5.54544	3.08791	19.6742	3.9676	8.78173	1.05946	2.0586	3.4033	41.1721	2.11148	26.6181	2.24492	6.54305	4.36203	2.24492	119.989	8.63931	114.398	4.16482	0.0720004	-3.79585	1.26709e-11	5.25381e-09
ENSG00000072571.19_4	HMMR	chr5	162887209	162918951	+	protein_coding_gene	44.415	69.643	42.734	115.225	87.4907	68.8651	157.483	63.2494	323.39	216.272	193.509	252.485	154.736	478.116	595.418	792.563	308.566	305.703	172.085	184.109	689.192	693.563	596.508	191.941	81.1382	384.26	69.2541	307.134	4.74017	2.24494	1.30928e-11	5.3763e-09
ENSG00000225431.1_2	LINC01671	chr21	44019390	44035168	-	lncRNA	72.7486	27.6664	48.0757	35.0685	27.7912	42.3785	59.6995	281.351	19.2749	7.76361	6.17581	9.83709	21.8218	9.75748	2.11893	5.14651	3.4033	16.4688	9.50165	12.2	5.61231	3.27152	2.18102	1.12246	74.3474	8.47857	45.2271	6.96971	0.114486	-3.12676	1.34564e-11	5.48496e-09
ENSG00000106538.9_3	RARRES2	chr7	150035406	150038763	-	protein_coding_gene	1242.09	1309.86	1456.52	1385.71	886.229	1825.45	2235.64	1236.64	527.917	503.526	414.809	413.158	457.266	571.788	200.239	232.622	357.346	520.827	693.621	557.871	844.091	568.155	166.848	292.963	1447.27	457.69	1347.78	480.396	0.316251	-1.66086	1.38624e-11	5.60922e-09
ENSG00000248632.1_3	AC106872.5	chr4	165889739	165891154	-	pseudogene	34.4599	49.6087	75.6747	69.135	66.9046	40.2596	67.9339	111.232	25.6998	26.6181	16.4688	12.0231	34.7165	17.5635	6.35678	11.3223	24.9575	26.7619	25.3377	21.0727	28.0616	15.2671	16.3576	14.592	64.401	20.1986	67.4193	19.3181	0.31433	-1.66965	1.44866e-11	5.8193e-09
ENSG00000179967.11_2	PPP1R14BP3	chr4	140036084	140036528	-	pseudogene	338.473	353.939	442.475	455.89	190.421	441.796	521.856	422.026	979.806	924.979	918.138	797.898	612.002	1561.2	1260.76	1843.48	738.516	606.259	822.421	862.87	1678.08	1527.8	1353.32	1060.73	395.86	1096.77	431.911	952.393	2.77084	1.47033	1.51545e-11	6.00062e-09
ENSG00000161055.3_3	SCGB3A1	chr5	180017103	180018540	-	protein_coding_gene	833.163	229.917	177.168	33.0646	147.19	80.5192	83.3735	50.1634	18.204	59.8907	4.11721	22.9532	7.9352	7.80598	2.11893	3.08791	3.4033	29.8498	20.059	4.43635	2.24492	9.81457	2.18102	2.24492	204.32	12.5217	115.282	6.12117	0.0612321	-4.02957	1.51221e-11	6.00062e-09
ENSG00000115138.10_3	POMC	chr2	25383722	25391772	-	protein_coding_gene	42.1176	15.2642	32.0505	31.0607	22.6446	16.9514	33.967	73.064	5.35413	13.3091	6.17581	5.46505	14.8785	7.80598	2.11893	6.17581	6.8066	11.3223	9.50165	11.0909	12.3471	5.45254	6.54305	4.48985	33.39	8.05233	31.5556	6.67482	0.241563	-2.04953	1.52902e-11	6.01144e-09
ENSG00000183196.8_3	CHST6	chr16	75505950	75529282	-	protein_coding_gene	76.5775	41.9766	46.2951	32.0626	69.9926	27.546	37.0549	37.0773	17.1332	16.6363	12.3516	4.37204	15.8704	14.6362	3.17839	10.293	7.94103	19.5567	6.33443	4.43635	16.8369	3.27152	11.9956	19.0819	46.0728	11.4954	39.5269	12.1736	0.249207	-2.00458	1.56308e-11	6.10205e-09
ENSG00000171208.9_3	NETO2	chr16	47111614	47177908	-	protein_coding_gene	208.291	134.516	86.3582	175.342	220.271	146.206	182.186	383.859	916.627	440.308	1586.15	831.781	946.272	1893.93	697.127	223.359	1258.09	1140.47	505.699	779.689	498.373	382.768	861.501	491.638	192.129	840.861	178.764	805.735	4.37826	2.13036	1.62959e-11	6.31723e-09
ENSG00000016602.9_3	CLCA4	chr1	87012761	87046437	+	protein_coding_gene	3969.01	296.698	256.404	73.1429	95.7251	112.303	89.5493	852.777	55.683	15.5272	6.17581	36.0693	41.6598	13.6605	6.35678	24.7033	12.4788	141.014	4.22296	92.0543	13.4695	14.1766	5.45254	5.61231	718.202	30.5198	184.353	13.9185	0.0424982	-4.55646	1.73639e-11	6.68449e-09
ENSG00000267968.1_3	AC011523.1	chr19	51333786	51354345	+	as_lncRNA	19.1444	26.7124	42.734	37.0724	24.7033	14.8325	34.9963	94.8742	130.641	545.671	521.856	337.74	347.165	731.811	314.661	334.523	122.519	74.1098	72.846	63.218	178.471	67.6115	193.02	319.902	36.8837	272.235	30.8543	253.84	7.39247	2.88606	1.76572e-11	6.75055e-09
ENSG00000128059.8_3	PPAT	chr4	57259528	57301781	-	protein_coding_gene	706.81	980.726	978.43	971.898	731.834	834.857	775.065	543.073	1452.04	1257.71	1810.54	1658.1	1520.58	1354.34	3071.38	2754.41	2197.4	1728.2	1755.69	1712.43	1290.83	1406.75	2165.75	2876.87	815.337	1875.81	804.961	1720.31	2.3005	1.20195	1.89711e-11	7.20315e-09
ENSG00000154102.10_4	C16orf74	chr16	85723690	85784735	-	protein_coding_gene	221.309	204.159	390.838	189.37	277.912	258.509	171.893	146.128	57.8246	51.018	37.0549	27.3253	86.2953	66.3508	28.6055	49.4065	40.8396	130.721	103.462	43.2544	76.3274	95.9647	20.7196	23.5717	232.515	58.6714	212.734	50.2123	0.252449	-1.98594	1.95842e-11	7.38536e-09
ENSG00000101856.9_3	PGRMC1	chrX	118370208	118378429	+	protein_coding_gene	5549.57	7222.84	8764.91	8356.32	6263.3	7708.65	7894.75	7889.82	5096.06	3267.37	2707.06	4041.95	3752.36	3954.71	4093.77	3297.88	3803.75	5483.09	4675.87	4367.59	4282.19	5284.6	4948.72	3825.35	7456.27	4180.15	7799.24	4067.86	0.560629	-0.834881	2.03263e-11	7.61345e-09
ENSG00000183873.15_4	SCN5A	chr3	38589548	38691164	-	protein_coding_gene	173.831	75.3671	144.227	55.1076	116.311	74.1624	88.52	98.1457	29.9831	29.9454	32.9377	17.4882	41.6598	51.7146	20.1298	22.6446	20.4198	53.5237	48.564	23.2908	47.1434	22.9007	14.1766	17.9594	103.209	30.9051	93.3328	26.6181	0.299513	-1.73931	2.04999e-11	7.62691e-09
ENSG00000284060.1_2	AC002472.2	chr22	21357184	21363742	-	pseudogene	23.739	41.9766	57.8689	30.0587	62.7874	39.2001	42.2014	49.0728	18.204	16.6363	3.08791	8.74408	13.8866	17.5635	2.11893	5.14651	13.6132	25.7326	8.44591	8.8727	10.1022	8.72406	10.9051	11.2246	43.3631	11.438	42.089	10.5036	0.264437	-1.91901	2.10542e-11	7.78093e-09
ENSG00000228873.1_3	AC012307.1	chr2	96811341	96812751	-	lncRNA	20.6759	5.72408	212.78	16.0313	5.14651	20.1298	40.1428	368.592	11.7791	2.21818	1.0293	2.18602	17.8542	0.975748	1.05946	2.0586	1.13443	2.0586	2.11148	4.43635	1.12246	5.45254	2.18102	1.12246	86.1527	3.67375	20.4029	2.08504	0.0428084	-4.54596	2.21261e-11	8.12293e-09
ENSG00000205978.5_3	NYNRIN	chr14	24867992	24888494	+	protein_coding_gene	644.017	372.065	799.481	337.66	750.361	525.494	532.149	446.018	87.8078	158.6	84.4028	114.766	284.675	224.422	77.3408	54.553	130.46	321.142	161.528	192.981	120.103	117.775	141.766	55.0006	550.906	145.458	528.821	125.282	0.2641	-1.92085	2.38284e-11	8.69033e-09
ENSG00000250641.1_4	AL662899.2	chr6	31674681	31685695	+	protein_coding_gene	53.6043	76.3211	50.7466	106.207	61.7581	52.9732	89.5493	51.2539	51.3997	12.2	7.20512	6.55806	16.8623	7.80598	4.23785	2.0586	5.67217	18.5274	11.6131	13.3091	4.48985	8.72406	4.36203	4.48985	67.8017	11.2197	57.6812	7.50555	0.165704	-2.59332	2.42077e-11	8.77093e-09
ENSG00000172201.11_3	ID4	chr6	19837617	19840915	+	protein_coding_gene	2855.58	2578.7	5818.05	3413.67	1873.33	4954.05	3521.24	4230.08	1256.08	558.98	157.483	596.784	724.087	416.644	111.244	277.912	532.049	925.343	1208.82	1812.25	746.437	443.837	501.634	261.534	3655.59	658.195	3467.46	545.515	0.180049	-2.47354	2.47964e-11	8.92589e-09
ENSG00000070731.10_3	ST6GALNAC2	chr17	74561461	74583038	-	protein_coding_gene	576.629	318.641	457.609	170.333	312.908	291.352	321.142	187.567	95.3035	55.4544	95.7251	83.0688	127.955	66.3508	18.0109	41.1721	37.4363	166.747	95.0165	72.0907	66.2253	43.6203	52.3444	12.3471	329.523	70.5543	315.774	66.288	0.214164	-2.22321	2.6054e-11	9.25837e-09
ENSG00000258932.5_3	AL390334.1	chr14	27727923	28314492	-	pseudogene	670.819	394.962	887.62	286.56	9837.04	589.061	132.78	126.499	223.803	149.727	64.846	119.138	98.1981	85.8658	28.6055	86.4614	243.903	224.388	48.564	97.5997	79.6948	31.6247	126.499	116.736	1615.67	114.103	492.012	97.8989	0.0706204	-3.82377	2.59478e-11	9.25837e-09
ENSG00000119986.6_3	AVPI1	chr10	99437181	99447080	-	protein_coding_gene	546.763	440.754	811.945	299.585	424.073	1029.8	593.907	503.815	267.707	202.963	168.806	204.393	242.024	249.791	129.254	110.135	133.863	276.882	244.931	237.345	170.614	143.947	175.572	56.1231	581.33	188.397	525.289	189.267	0.324154	-1.62525	2.68533e-11	9.4816e-09
ENSG00000183010.16_3	PYCR1	chr17	79890260	79900288	-	protein_coding_gene	888.299	1724.86	1077.25	1996.9	540.384	1384.72	1691.14	1309.7	3093.62	2821.52	4376.59	3084.48	1764.59	3927.38	6157.6	3913.41	2808.86	3370.96	4008.64	2455.52	3269.73	6305.32	4073.05	4703.12	1326.66	3758.4	1347.21	3642.19	2.83314	1.5024	2.93411e-11	1.02297e-08
ENSG00000204616.10_3	TRIM31	chr6	30070674	30080883	-	protein_coding_gene	1794.98	33.3905	8.01262	12.0235	27.7912	5.29732	14.4102	21.8102	8.56661	3.32726	9.26372	8.74408	11.9028	12.6847	16.9514	5.14651	3.4033	4.11721	1.05574	8.8727	6.73477	13.0861	4.36203	3.36739	239.714	7.59915	18.1102	7.65069	0.03171	-4.97892	2.93378e-11	1.02297e-08
ENSG00000248330.5_2	LINC00613	chr4	136788138	136834835	-	lncRNA	59.7305	10.4942	10.6835	47.092	1338.09	2.11893	6.17581	1.09051	10.7083	14.4181	4.11721	3.27903	2.9757	1.9515	3.17839	6.17581	4.53773	3.08791	6.33443	6.65453	4.48985	4.36203	5.45254	5.61231	184.435	5.45846	10.5888	4.51379	0.029566	-5.07992	2.95693e-11	1.02448e-08
ENSG00000069482.6_3	GAL	chr11	68451247	68458643	+	protein_coding_gene	6.1262	7.63211	2.67087	10.0196	3.08791	5.29732	4.11721	15.2671	51.3997	29.9454	46.3186	25.1392	27.7732	37.0784	52.9732	60.7288	23.8231	18.5274	15.8361	9.98179	17.9594	51.2539	68.702	34.7963	6.77729	35.7648	5.71176	32.3708	5.32047	2.41155	2.97715e-11	1.02508e-08
ENSG00000105974.11_3	CAV1	chr7	116164839	116201238	+	protein_coding_gene	6964.72	3433.5	5995.22	4324.45	7231.88	4217.72	3914.44	3348.95	1938.2	1735.72	1081.8	1293.03	1915.36	1427.52	451.331	969.603	1667.62	2922.19	2457.76	1582.67	1222.36	1260.63	1089.42	599.395	4928.86	1475.91	4271.08	1360.28	0.299442	-1.73965	3.03637e-11	1.03902e-08
ENSG00000138028.15_3	CGREF1	chr2	27321757	27341983	-	protein_coding_gene	119.461	243.274	251.062	375.734	82.3442	244.736	251.15	67.6115	890.927	570.071	951.075	375.996	467.185	356.148	1534.1	1503.81	940.445	671.105	941.719	731.998	400.719	1552.88	1498.36	1514.2	204.421	931.296	244.005	915.686	4.55575	2.18769	3.12723e-11	1.06354e-08
ENSG00000178750.2_3	STX19	chr3	93733213	93747454	-	protein_coding_gene	219.012	401.64	845.776	388.759	148.22	531.85	352.021	512.539	1515.22	1305.4	2873.81	1819.86	1393.62	1363.12	1610.38	1684.97	1115.15	545.53	1607.89	1690.25	1615.22	1799.34	524.534	1646.65	424.977	1506.93	395.2	1609.14	3.54602	1.8262	3.155e-11	1.06645e-08
ENSG00000121552.3_3	CSTA	chr3	122044091	122060819	+	protein_coding_gene	553.655	698.338	461.171	569.112	252.179	439.677	628.904	360.958	252.715	62.1089	46.3186	203.3	112.085	133.677	46.6164	112.194	56.7217	161.6	95.0165	220.708	180.716	97.0552	44.7108	65.1028	495.499	118.165	507.413	104.57	0.238459	-2.06819	3.69036e-11	1.23985e-08
ENSG00000214491.8_3	SEC14L6	chr22	30918786	30942669	-	protein_coding_gene	124.821	45.7927	99.7126	138.27	161.6	62.5083	117.34	61.0684	29.9831	42.1453	15.4395	48.0925	19.838	37.0784	14.8325	6.17581	11.3443	24.7033	31.6722	16.6363	14.592	18.5386	6.54305	5.61231	101.389	21.4517	108.527	17.5875	0.211667	-2.24013	3.7552e-11	1.25403e-08
ENSG00000282301.1_3	CYP3A7-CYP3A51P	chr7	99282580	99332725	-	protein_coding_gene	134.776	89.6773	159.362	48.0939	16.4688	190.703	56.6116	165.757	50.3288	19.9636	10.293	18.5812	13.8866	42.9329	7.41624	13.3809	7.94103	21.6153	13.7246	26.6181	8.9797	13.0861	14.1766	6.73477	107.681	18.1037	112.227	13.8056	0.168321	-2.57071	3.90184e-11	1.29517e-08
ENSG00000140274.13_3	DUOXA2	chr15	45406519	45410619	+	protein_coding_gene	1327.85	1.90803	3.56116	11.0215	1.0293	6.35678	2.0586	10.9051	3.21248	2.21818	8.23442	1.09301	1.9838	0.975748	2.11893	3.08791	2.26887	3.08791	1.05574	1.10909	1.12246	1.09051	1.09051	1.12246	170.587	2.1795	4.95897	1.55313	0.0127941	-6.28838	3.9251e-11	1.29517e-08
ENSG00000167747.14_4	C19orf48	chr19	51300961	51308186	-	protein_coding_gene	1306.41	3355.27	2177.65	4017.85	1112.68	2575.55	3078.64	1857.13	7120.99	7084.85	7275.11	6215.95	3911.06	7169.79	6937.36	10885.9	5564.39	6327.12	6545.58	4030.42	4952.3	8850.56	4649.92	7898.77	2435.15	6588.76	2376.6	6741.47	2.70579	1.43605	3.98383e-11	1.29908e-08
ENSG00000184785.5_3	SMIM10	chrX	134124968	134126503	+	protein_coding_gene	349.193	343.445	465.622	338.661	405.545	327.374	367.461	352.234	197.032	135.309	72.0512	91.8129	97.2062	122.944	37.0812	50.4358	102.099	134.839	129.856	187.436	197.553	140.675	44.7108	66.2253	368.692	112.954	350.714	112.522	0.306283	-1.70706	3.96961e-11	1.29908e-08
ENSG00000269086.2_3	AC008555.2	chr19	35328793	35346208	+	lncRNA	18.3786	51.5168	25.8184	23.045	8.23442	38.1407	23.674	47.9823	148.845	320.526	335.553	392.391	636.8	434.208	206.595	117.34	52.1839	27.7912	235.43	212.945	44.8985	45.8013	334.786	165.002	29.5988	231.943	24.7462	209.77	7.8446	2.9717	4.19367e-11	1.35866e-08
ENSG00000149557.12_3	FEZ1	chr11	125315641	125366213	-	protein_coding_gene	476.312	296.698	351.665	317.62	508.475	324.196	474.508	432.932	192.749	145.29	95.7251	116.952	158.704	161.974	46.6164	67.9339	117.981	161.6	181.587	156.381	248.064	149.4	75.245	69.5926	397.801	134.112	392.298	147.345	0.337122	-1.56866	4.21557e-11	1.35866e-08
ENSG00000132932.16_3	ATP8A2	chr13	25946209	26599989	+	protein_coding_gene	464.826	181.263	233.256	333.652	119.399	179.049	294.38	218.102	1993.88	3053.32	7842.25	3000.31	5889.9	2207.14	1665.48	2622.66	2267.73	263.501	66.5116	2416.7	635.314	9583.38	142.857	4862.51	252.991	3032.09	225.679	2342.22	11.9833	3.58296	4.3625e-11	1.39789e-08
ENSG00000179909.15_3	ZNF154	chr19	58208735	58220562	-	protein_coding_gene	527.619	1086.62	858.24	420.822	1017.98	719.375	529.061	630.313	188.465	226.254	108.077	106.022	335.262	146.362	30.7244	113.223	105.502	366.432	183.699	76.5271	127.961	54.5254	149.4	37.0412	723.754	147.217	674.844	120.592	0.203468	-2.29712	4.56629e-11	1.45342e-08
ENSG00000258185.2_4	AC010196.1	chr12	86993355	87232775	-	lncRNA	304.779	40.0686	198.535	127.249	937.694	81.5787	103.96	62.1589	63.1787	46.5817	22.6446	19.6742	36.7003	25.3694	10.5946	36.0256	26.092	64.846	8.44591	28.8363	28.0616	14.1766	28.3532	32.5514	232.003	30.7583	115.604	28.2074	0.132588	-2.91497	4.58824e-11	1.45342e-08
ENSG00000042493.15_3	CAPG	chr2	85621871	85645555	-	protein_coding_gene	2373.9	1458.69	2776.82	2264.42	995.335	2008.74	1528.51	1398.03	593.238	363.781	198.655	344.298	860.969	742.544	1021.32	434.366	372.094	524.944	346.282	429.217	865.418	608.503	430.751	165.002	1850.56	518.837	1768.63	432.558	0.280373	-1.83458	4.74793e-11	1.49546e-08
ENSG00000180592.16_3	SKIDA1	chr10	21802407	21815297	-	protein_coding_gene	78.8748	186.033	158.472	77.1507	81.3149	139.849	117.34	81.7881	39.6206	23.2908	28.8205	42.6274	54.5545	44.8844	18.0109	11.3223	22.6887	66.9046	47.5083	26.6181	23.5717	17.4481	13.0861	24.6942	115.103	31.6032	99.5643	25.6561	0.274996	-1.86252	4.9697e-11	1.55647e-08
ENSG00000102934.9_3	PLLP	chr16	57282459	57318599	-	protein_coding_gene	182.254	207.975	346.323	86.1683	98.813	189.644	273.794	298.799	56.7538	70.9816	32.9377	67.7666	54.5545	73.1811	38.1407	17.4981	39.7052	116.311	47.5083	86.5088	53.8782	67.6115	82.8786	39.2862	210.471	59.0939	198.809	55.6541	0.280764	-1.83257	5.08509e-11	1.58366e-08
ENSG00000170571.11_3	EMB	chr5	49692026	49739082	-	protein_coding_gene	4309.78	7741.82	8074.94	6391.48	5658.07	8909.03	6901.47	4907.28	9981.17	10070.5	13322.3	14745.8	10798.8	10686.4	18614.8	10650.2	15055.1	14653.1	11161.3	18726.9	11495.1	15281.3	12531	12573.8	6611.74	13146.7	6646.48	12552.4	1.98841	0.991618	5.84184e-11	1.80918e-08
ENSG00000267943.1_3	AC010328.1	chr19	53510765	53516433	+	lncRNA	8.42353	8.58613	16.0252	19.0372	19.5567	10.5946	9.26372	16.3576	4.28331	1.10909	2.0586	1.09301	4.9595	2.92724	3.17839	1.0293	4.53773	7.20512	5.2787	1.10909	1.12246	2.18102	1.09051	1.12246	13.4806	2.76784	13.3099	2.11981	0.208169	-2.26417	6.13372e-11	1.88902e-08
ENSG00000241935.8_3	HOGA1	chr10	99344080	99372559	+	protein_coding_gene	57.4331	82.0452	90.8097	76.1487	133.809	48.7353	61.7581	44.7108	21.4165	31.0545	4.11721	15.3021	13.8866	31.2239	3.17839	8.23442	5.67217	27.7912	25.3377	22.1818	23.5717	9.81457	15.2671	7.85723	74.4313	16.6192	68.9534	15.2846	0.223421	-2.16216	6.17789e-11	1.89211e-08
ENSG00000156096.13_3	UGT2B4	chr4	70345883	70391732	-	protein_coding_gene	37.523	27.6664	12.4641	31.0607	73.0805	7.41624	8.23442	7.63355	2880.52	98.7088	1468.81	1981.63	90.2629	351.269	418.488	160.571	197.391	1338.09	101.351	17.7454	47.1434	112.322	608.503	20.2043	25.6348	618.314	20.0652	178.981	24.1086	4.59147	6.3301e-11	1.91754e-08
ENSG00000189433.5_3	GJB4	chr1	35225342	35229325	+	protein_coding_gene	568.205	36.2525	60.5398	13.0254	37.0549	22.2487	47.3479	23.9912	1.07083	5.54544	3.08791	7.65107	19.838	3.90299	3.17839	5.14651	3.4033	24.7033	10.5574	8.8727	2.24492	4.36203	6.54305	2.24492	101.083	7.02204	36.6537	4.75427	0.0695262	-3.8463	6.31394e-11	1.91754e-08
ENSG00000233041.8_3	PHGR1	chr15	40643234	40648635	+	protein_coding_gene	4.59465	8.58613	1.78058	12.0235	3.08791	9.53517	12.3516	1.09051	61.0371	99.8179	707.131	73.2317	66.4573	136.605	994.836	171.893	1.13443	2.0586	121.41	12.2	197.553	1091.6	11.9956	16.8369	6.63126	235.362	6.59039	86.5248	35.5354	5.15118	6.55592e-11	1.97515e-08
ENSG00000112175.7_3	BMP5	chr6	55618443	55740362	-	protein_coding_gene	2682.51	1465.37	497.673	5491.73	11968.7	188.584	65.8753	30.5342	51.3997	53.2362	12.3516	69.9527	39.676	107.332	15.8919	30.8791	18.1509	459.069	111.908	32.1635	28.0616	52.3444	52.3444	474.801	2798.87	100.598	981.519	51.872	0.0359424	-4.79817	6.80958e-11	2.04048e-08
ENSG00000117143.13_4	UAP1	chr1	162531296	162569632	+	protein_coding_gene	8561.37	7042.53	3345.71	8055.73	4069.86	4295.06	5011.67	5581.22	21401.5	13687.3	32220.2	18191	13821.1	13617.5	23762.7	20258.7	12189.5	11876.1	12962.4	14726.5	6032.11	27149.3	12276.9	25704.4	5745.4	17492.3	5296.45	14273.8	3.04454	1.60622	7.12031e-11	2.12212e-08
ENSG00000137699.16_1	TRIM29	chr11	119981983	120056237	-	protein_coding_gene	3160.35	1403.35	2022.74	940.838	1813.63	1431.33	1260.9	946.561	330.885	215.163	146.161	287.462	490.99	279.064	43.438	94.6958	137.266	624.786	401.181	322.745	147.043	114.503	42.5298	20.2043	1622.46	231.132	1417.34	181.103	0.14247	-2.81127	8.18031e-11	2.425e-08
ENSG00000128040.10_3	SPINK2	chr4	57676026	57687908	-	protein_coding_gene	14.5497	9.54014	19.5864	27.0528	3.08791	7.41624	16.4688	1622.68	8.56661	12.2	4.11721	6.55806	2.9757	17.5635	4.23785	12.3516	6.8066	4.11721	3.16722	6.65453	12.3471	4.36203	6.54305	5.61231	215.047	7.38628	15.5093	6.55055	0.0343664	-4.86286	8.78344e-11	2.58995e-08
ENSG00000197757.7_3	HOXC6	chr12	54384408	54424607	+	protein_coding_gene	26.0364	11.4482	64.9912	58.1135	9.26372	118.66	61.7581	15.2671	26.7707	158.6	49.4065	345.391	387.833	79.0356	667.462	403.486	867.841	500.241	842.48	519.053	337.861	348.962	794.98	436.638	45.6923	422.878	42.0749	395.66	9.25904	3.21086	8.92528e-11	2.61359e-08
ENSG00000246022.2_3	ALDH1L1-AS2	chr3	125898908	125929012	+	as_lncRNA	56.6674	43.8846	56.0883	22.0431	96.7544	18.0109	27.7912	35.9868	8.56661	9.98179	8.23442	8.74408	17.8542	25.3694	2.11893	6.17581	3.4033	15.4395	7.39017	7.76361	6.73477	4.36203	4.36203	4.48985	44.6533	8.81191	39.9357	7.57689	0.198394	-2.33356	8.95793e-11	2.61359e-08
ENSG00000231482.2_3	AC141930.2	chr2	1576326	1584083	-	lncRNA	9.1893	63.9189	18.6961	53.1037	22.6446	41.3191	20.586	5.45254	178.828	379.308	1037.54	280.904	387.833	283.943	98.5301	464.215	214.408	60.7288	313.555	36.5999	159.39	127.589	21.8102	560.109	29.3638	287.83	21.6153	247.656	9.80807	3.29397	9.1323e-11	2.65052e-08
ENSG00000171124.12_3	FUT3	chr19	5842899	5851485	-	protein_coding_gene	70.4513	27.6664	14.2447	16.0313	13.3809	12.7136	12.3516	55.6159	6.42496	4.43635	3.08791	7.65107	6.9433	4.87874	1.05946	3.08791	4.53773	9.26372	7.39017	2.21818	5.61231	4.36203	1.09051	1.12246	27.807	4.57293	15.138	4.48704	0.164314	-2.60548	9.4638e-11	2.73242e-08
ENSG00000086696.10_3	HSD17B2	chr16	82068609	82132139	+	protein_coding_gene	366.041	34.3445	64.1009	65.1272	74.1098	60.3894	83.3735	285.713	36.4081	17.7454	16.4688	31.6973	19.838	22.4422	28.6055	23.674	18.1509	30.8791	5.2787	38.8181	34.7963	11.9956	7.63355	13.4695	129.15	22.3688	69.6185	21.1401	0.173058	-2.53067	9.68216e-11	2.78099e-08
ENSG00000255523.1_3	AP001652.1	chr11	58684488	58696162	-	as_lncRNA	9.95508	5.72408	11.5738	10.0196	3.08791	2.11893	5.14651	14.1766	79.2411	135.309	95.7251	122.417	107.125	644.969	42.3785	38.0842	55.5872	51.4651	45.3968	14.4181	24.6942	23.9912	11.9956	66.2253	7.72531	97.4389	7.83958	53.5262	12.594	3.65467	1.00675e-10	2.87677e-08
ENSG00000160870.12_3	CYP3A7	chr7	99302660	99332819	-	protein_coding_gene	115.632	69.643	136.214	40.0783	16.4688	167.395	52.4944	143.947	41.7622	17.7454	7.20512	17.4882	10.9109	36.1027	3.17839	10.293	5.67217	14.4102	11.6131	23.2908	5.61231	11.9956	9.81457	4.48985	92.7342	14.474	92.6375	11.262	0.156282	-2.67778	1.01433e-10	2.88355e-08
ENSG00000276115.1_4	AC026356.2	chr12	32505283	32507078	+	lncRNA	22.9733	128.792	36.5019	59.1155	82.3442	56.1515	38.0842	18.5386	78.1703	188.545	335.553	224.067	306.497	254.67	229.903	197.626	237.097	391.135	360.007	106.472	154.9	130.861	177.753	182.961	55.3126	222.264	47.1179	210.847	4.0213	2.00766	1.0619e-10	2.97305e-08
ENSG00000157551.17_3	KCNJ15	chr21	39529128	39679279	+	protein_coding_gene	2232.23	401.64	324.956	357.699	812.119	257.45	200.714	758.993	174.545	56.5635	60.7288	193.463	136.882	123.92	30.7244	114.253	133.863	268.648	91.8493	87.6179	42.6536	73.064	80.6976	30.3065	668.226	106.236	379.669	89.7336	0.158978	-2.6531	1.05187e-10	2.97305e-08
ENSG00000137440.4_3	FGFBP1	chr4	15937192	15940363	-	protein_coding_gene	1435.83	33.3905	20.4767	15.0294	37.0549	32.8434	5.14651	42.5298	34.2664	4.43635	3.08791	4.37204	13.8866	4.87874	1.05946	9.26372	1.13443	8.23442	10.5574	5.54544	1.12246	7.63355	3.27152	1.12246	202.787	7.11706	33.1169	4.65754	0.0351174	-4.83167	1.05828e-10	2.97305e-08
ENSG00000164379.6_3	FOXQ1	chr6	1312675	1314983	+	protein_coding_gene	682.306	233.733	265.307	102.2	146.161	131.373	48.3772	58.8874	10.7083	17.7454	6.17581	68.8597	34.7165	37.0784	30.7244	22.6446	12.4788	49.4065	51.7312	53.2362	11.2246	28.3532	23.9912	41.5311	208.543	31.2879	138.767	29.5388	0.149919	-2.73775	1.11879e-10	3.101e-08
ENSG00000125968.8_3	ID1	chr20	30193086	30194318	+	protein_coding_gene	12989.1	2030.14	8829.01	1575.08	654.636	5982.79	3007.62	10196.2	1849.32	789.67	251.15	635.039	812.366	944.524	125.017	417.897	403.858	1350.44	441.299	832.925	1175.22	613.956	993.453	145.92	5658.08	736.378	4495.2	712.355	0.130146	-2.9418	1.11793e-10	3.101e-08
ENSG00000153029.14_3	MR1	chr1	181002561	181031074	+	protein_coding_gene	1412.86	1600.84	1820.64	1477.89	1403.97	1681.37	1645.85	2091.59	663.912	483.562	445.688	577.109	842.123	954.281	1043.57	455.981	592.174	961.368	737.962	581.162	874.398	664.119	496.181	228.982	1641.88	662.661	1623.34	628.043	0.403652	-1.30881	1.12968e-10	3.11561e-08
ENSG00000246430.6_3	LINC00968	chr8	57408805	57472382	-	lncRNA	232.796	117.344	59.6495	137.268	505.387	121.838	61.7581	211.559	72.8162	19.9636	20.586	29.5113	36.7003	51.7146	9.53517	23.674	21.5542	90.5786	20.059	19.9636	16.8369	10.9051	21.8102	25.8166	180.95	30.7516	129.553	21.6822	0.170142	-2.55519	1.14381e-10	3.13895e-08
ENSG00000273049.1_4	AC012531.3	chr12	54379629	54428672	+	protein_coding_gene	32.1626	11.4482	71.2233	59.1155	10.293	131.373	68.9632	22.9007	28.9123	165.254	55.5823	357.414	417.59	91.7203	708.781	416.867	931.37	527.003	902.657	573.398	354.698	366.411	864.773	456.842	50.935	451.205	45.639	417.229	8.86202	3.14764	1.20643e-10	3.29449e-08
ENSG00000142627.12_3	EPHA2	chr1	16450832	16482582	-	protein_coding_gene	3962.12	565.73	592.934	293.573	356.139	431.201	278.941	184.296	210.953	105.363	67.9339	103.836	116.052	170.756	24.3677	104.989	80.5447	215.124	171.03	64.3271	118.981	68.702	44.7108	34.7963	833.117	106.404	393.67	104.412	0.127707	-2.96909	1.23356e-10	3.35208e-08
ENSG00000129465.15_3	RIPK3	chr14	24805227	24809251	-	protein_coding_gene	131.713	77.2751	84.5776	60.1174	50.4358	95.3517	141.014	81.7881	39.6206	32.1635	15.4395	43.7204	51.5788	43.9086	38.1407	31.9084	40.8396	44.26	30.6164	29.9454	26.9391	37.0773	28.3532	14.592	90.2842	34.319	83.1829	34.6204	0.380105	-1.39553	1.29485e-10	3.50147e-08
ENSG00000170178.6_3	HOXD12	chr2	176964458	176965921	+	protein_coding_gene	12.2524	7.63211	24.0379	8.01566	29.8498	7.41624	19.5567	11.9956	3.21248	3.32726	2.0586	2.18602	3.9676	2.92724	3.17839	3.08791	3.4033	8.23442	2.11148	1.10909	3.36739	3.27152	1.09051	2.24492	15.0945	3.04863	12.124	3.13315	0.202815	-2.30176	1.33719e-10	3.5984e-08
ENSG00000126787.12_3	DLGAP5	chr14	55614830	55658396	-	protein_coding_gene	44.415	25.7584	15.1349	50.0979	51.4651	25.4271	79.2563	28.3532	118.862	84.2907	127.633	109.301	120.02	281.015	337.969	399.369	142.939	111.165	95.0165	94.2725	456.842	365.32	399.126	94.2868	39.9885	208.589	36.3841	123.827	5.21847	2.38363	1.38554e-10	3.69266e-08
ENSG00000168269.8_3	FOXI1	chr5	169532901	169536729	+	protein_coding_gene	81.1722	42.9306	230.585	6.01174	7.20512	101.708	54.553	52.3444	9.63744	1.10909	2.0586	30.6043	1.9838	0.975748	1.05946	1.0293	2.26887	2.0586	3.16722	7.76361	1.12246	2.18102	1.09051	1.12246	72.0639	4.32703	53.4487	2.0212	0.0598565	-4.06235	1.38064e-10	3.69266e-08
ENSG00000221381.1	SNORD88B	chr19	51302289	51302379	-	snoRNA	6.1262	24.8044	24.9281	24.047	19.5567	20.1298	28.8205	10.9051	37.4789	56.5635	111.165	48.0925	64.4735	56.5934	41.3191	77.1977	46.5118	91.6079	124.577	51.018	66.2253	52.3444	50.1634	46.0209	19.9147	63.8345	22.0884	54.4539	3.21899	1.68661	1.46365e-10	3.88217e-08
ENSG00000281398.2_3	SNHG4	chr5	138609791	138618933	+	lncRNA	1946.6	2301.08	2157.17	3659.15	1023.13	2442.06	3033.35	1680.47	32870.1	13675.1	12323.8	3315.1	6547.53	7304.45	10427.2	20410	10091.9	10432	2123.09	7151.4	6085.99	13262.8	4888.75	11570.3	2280.38	10780	2229.13	10259.6	4.72729	2.24101	1.54608e-10	4.0536e-08
ENSG00000265460.6_3	AC015910.1	chr17	37394719	37407071	+	pseudogene	20.6759	19.0803	57.8689	5.00979	4.11721	59.3299	21.6153	54.5254	8.56661	4.43635	1.0293	12.0231	0.9919	3.90299	2.11893	4.11721	1.13443	2.0586	1.05574	4.43635	1.12246	2.18102	1.09051	3.36739	30.2778	3.35206	21.1456	2.14997	0.110586	-3.17675	1.55022e-10	4.0536e-08
ENSG00000205089.7_3	CCNI2	chr5	132083137	132090095	+	protein_coding_gene	65.0909	39.1146	112.177	21.0411	9.26372	36.0217	90.5786	331.514	12.8499	3.32726	2.0586	14.2091	22.8137	9.75748	2.11893	4.11721	4.53773	23.674	4.22296	9.98179	2.24492	1.09051	3.27152	2.24492	88.1002	7.65753	52.1027	4.17008	0.0872265	-3.51909	1.54797e-10	4.0536e-08
ENSG00000141314.12_3	RHBDL3	chr17	30593195	30651680	+	protein_coding_gene	150.858	107.804	176.278	143.28	306.732	115.481	100.872	61.0684	56.7538	46.5817	37.0549	37.1624	56.5383	31.2239	10.5946	28.8205	13.6132	71.0219	31.6722	45.4726	19.0819	25.0817	59.9779	16.8369	145.297	36.718	129.381	34.3635	0.252845	-1.98368	1.56511e-10	4.07332e-08
ENSG00000163110.14_3	PDLIM5	chr4	95373008	95589378	+	protein_coding_gene	23870	80663.8	59089.5	77134.7	46683	47070.9	34393.1	89430.4	204429	230229	293702	141274	148132	146994	279476	371364	91780.2	243618	214502	83392.3	65795.4	340365	283195	421322	57291.9	222473	53080.2	222365	3.88316	1.95723	1.6469e-10	4.26179e-08
ENSG00000128714.5_3	HOXD13	chr2	176957619	176960666	+	protein_coding_gene	428.834	450.295	1217.03	367.718	739.039	472.521	374.666	683.748	185.253	79.8543	4.11721	80.8828	115.06	83.9143	4.23785	20.586	19.2854	153.366	73.9017	83.1816	40.4086	22.9007	9.81457	12.3471	591.731	61.8195	461.408	57.1552	0.104501	-3.25842	1.6529e-10	4.26179e-08
ENSG00000197674.6_3	OR51C1P	chr11	4711653	4719061	-	pseudogene	186.849	3241.74	26.7087	871.703	393.193	558.337	281	65.4305	2410.43	9159.96	27320.8	6257.48	22745.3	6526.78	5741.23	7118.65	7024.41	7801.08	10285	6662.29	3814.13	3663.02	612.865	21728.6	703.12	9304.5	337.096	6843.35	13.2331	3.72608	1.79955e-10	4.61844e-08
ENSG00000204323.5_3	SMIM5	chr17	73629514	73637484	+	protein_coding_gene	150.092	54.3788	47.1854	28.0548	13.3809	74.1624	65.8753	32.7152	11.7791	5.54544	7.20512	12.0231	15.8704	12.6847	13.773	15.4395	10.2099	24.7033	19.0033	16.6363	17.9594	17.4481	11.9956	16.8369	58.2306	14.3196	50.7821	14.6063	0.245162	-2.02819	1.81181e-10	4.62846e-08
ENSG00000133067.17_3	LGR6	chr1	202163029	202288909	+	protein_coding_gene	329.283	302.422	248.391	252.493	821.383	139.849	108.077	51.2539	44.9747	70.9816	43.2307	34.9763	97.2062	20.4907	21.1893	67.9339	18.1509	118.37	53.8427	23.2908	12.3471	17.4481	29.4437	35.9188	281.644	44.3622	250.442	35.4476	0.157609	-2.66558	1.8554e-10	4.71807e-08
ENSG00000184905.8_3	TCEAL2	chrX	101380660	101382683	+	protein_coding_gene	295.589	471.283	1203.67	303.593	447.746	652.629	563.028	1599.77	394.064	52.1271	30.8791	50.2785	127.955	70.2538	19.0703	56.6116	54.4528	116.311	112.964	120.891	116.736	107.96	10.9051	24.6942	692.165	91.6346	517.156	63.4327	0.132404	-2.91698	1.87022e-10	4.72892e-08
ENSG00000174279.4_3	EVX2	chr2	176942200	176948641	-	protein_coding_gene	67.3882	52.4708	213.67	58.1135	173.952	82.6381	50.4358	57.7969	35.3373	26.6181	2.0586	15.3021	10.9109	8.78173	3.17839	4.11721	1.13443	26.7619	23.2263	16.6363	5.61231	3.27152	4.36203	6.73477	94.5582	12.1277	62.7509	7.75825	0.128261	-2.96285	1.87672e-10	4.72892e-08
ENSG00000103034.14_3	NDRG4	chr16	58496750	58547532	+	protein_coding_gene	247.345	64.8729	101.493	65.1272	156.454	91.1138	71.0219	407.85	54.6121	37.709	21.6153	28.4183	36.7003	18.5392	33.9028	11.3223	29.4953	45.2893	38.0066	8.8727	47.1434	27.2627	56.7064	16.8369	150.66	32.027	96.3035	31.699	0.212554	-2.2341	1.97254e-10	4.94787e-08
ENSG00000143401.14_4	ANP32E	chr1	150190717	150208504	-	protein_coding_gene	1993.31	1986.26	2807.09	2366.62	1987.58	1955.77	2065.81	2183.2	1299.98	1032.56	532.149	1179.36	991.9	1102.59	358.099	829.618	833.808	881.083	805.529	1540.52	1115.73	1017.44	689.201	644.293	2168.2	928.367	2029.56	936.491	0.428159	-1.22378	2.06094e-10	5.14631e-08
ENSG00000140873.15_3	ADAMTS18	chr16	77281710	77469011	-	protein_coding_gene	198.336	62.0109	26.7087	801.566	2034.93	48.7353	62.7874	67.6115	44.9747	59.8907	23.674	9.83709	16.8623	22.4422	39.2001	27.7912	19.2854	63.8167	72.846	23.2908	35.9188	19.6291	41.4393	15.7145	412.836	33.5383	65.1995	25.7326	0.0812491	-3.6215	2.10349e-10	5.22901e-08
ENSG00000258162.2_3	AC069228.1	chr12	81771821	81866733	+	as_lncRNA	71.2171	20.0343	31.1602	61.1194	13.3809	85.8165	19.5567	17.4481	29.9831	103.145	107.047	4628.9	168.623	985.505	121.838	585.673	10430	313.937	29.5607	1567.14	1146.03	61.0684	782.985	38.1637	39.9667	1318.72	25.5972	241.28	32.9853	5.04375	2.12864e-10	5.2679e-08
ENSG00000256812.1_3	CAPNS2	chr16	55600584	55601599	+	protein_coding_gene	245.048	213.699	145.117	15.0294	53.5237	79.4597	52.4944	52.3444	13.9207	5.54544	9.26372	6.55806	27.7732	25.3694	2.11893	7.20512	5.67217	38.0842	8.44591	28.8363	5.61231	3.27152	3.27152	4.48985	107.09	12.2149	66.4917	6.88159	0.114261	-3.1296	2.19746e-10	5.41406e-08
ENSG00000180616.8_3	SSTR2	chr17	71161151	71172772	+	protein_coding_gene	402.032	194.619	138.885	238.466	403.486	133.492	191.45	123.227	91.0202	73.1998	59.6995	36.0693	53.5626	92.696	12.7136	44.26	46.5118	23.674	117.187	42.1453	46.0209	81.7881	65.4305	25.8166	228.207	56.9872	193.035	50.0372	0.249699	-2.00174	2.24263e-10	5.5009e-08
ENSG00000260228.5_3	AC009119.1	chr16	83823572	83841439	-	as_lncRNA	60.4962	331.997	97.932	108.211	56.6116	65.6867	104.989	95.9647	1815.05	344.926	2273.73	958.57	885.767	866.464	2434.65	122.487	728.306	563.028	180.531	308.326	1115.73	1555.06	51.2539	1966.55	115.236	1010.65	96.9483	876.115	8.77003	3.13258	2.63925e-10	6.41696e-08
ENSG00000164616.15_2	FBXL21	chr5	135266006	135287280	+	pseudogene	578.16	305.284	84.5776	525.025	2276.82	39.2001	39.1135	13.0861	14.9916	29.9454	22.6446	28.4183	12.8947	45.8601	3.17839	5.14651	6.8066	81.3149	67.5673	4.43635	1.12246	3.27152	11.9956	33.6739	482.658	23.3293	194.931	13.9431	0.0483618	-4.36999	2.62828e-10	6.41696e-08
ENSG00000173253.15_3	DMRT2	chr9	1049858	1057552	+	protein_coding_gene	19.1444	18.1263	52.5272	7.0137	7.20512	19.0703	10.293	43.6203	4.28331	1.10909	4.11721	3.27903	1.9838	1.9515	1.05946	1.0293	1.13443	12.3516	3.16722	2.21818	1.12246	4.36203	4.36203	1.12246	22.125	3.04082	18.5983	2.10099	0.137941	-2.85788	2.69829e-10	6.53186e-08
ENSG00000261117.1_3	AC009486.1	chr2	12855541	12856353	+	lncRNA	14.5497	8.58613	18.6961	9.01761	11.3223	11.6541	15.4395	19.6291	5.35413	4.43635	2.0586	3.27903	3.9676	3.90299	2.11893	3.08791	3.4033	7.20512	5.2787	4.43635	4.48985	3.27152	3.27152	2.24492	13.6118	3.86293	13.1019	3.65314	0.283909	-1.8165	2.79778e-10	6.74326e-08
ENSG00000142910.15_3	TINAGL1	chr1	32042086	32053287	+	protein_coding_gene	1869.26	809.004	934.805	650.27	944.899	928.09	847.116	744.817	282.698	354.908	285.117	216.416	355.1	449.82	86.876	197.626	208.736	476.567	510.978	212.945	387.249	350.053	222.464	102.144	966.032	293.731	887.603	283.907	0.304053	-1.71761	2.87736e-10	6.90504e-08
ENSG00000254399.2_2	GLYATL1P4	chr11	58810210	58818444	+	pseudogene	6.89198	3.81606	6.23204	6.01174	1.0293	4.23785	4.11721	4.36203	38.5497	33.2726	39.1135	39.3484	38.6841	20.4907	16.9514	15.4395	11.3443	18.5274	13.7246	7.76361	29.184	13.0861	11.9956	20.2043	4.58728	22.98	4.29994	19.3659	4.94847	2.30698	2.93669e-10	7.01705e-08
ENSG00000151746.13_3	BICD1	chr12	32259769	32536567	+	protein_coding_gene	1894.53	7469.93	2529.32	4177.16	4746.11	3707.06	2995.27	1543.07	4879.76	10273.5	16785.9	10776	17207.5	13839	14118.4	13773.1	14302.9	20967.9	19229.2	7981	6857.12	6603.02	11042.5	7692.23	3632.81	12270.6	3351.17	12407.8	3.37776	1.75606	3.06937e-10	7.29754e-08
ENSG00000125247.15_3	TMTC4	chr13	101256181	101327347	-	protein_coding_gene	794.875	2475.67	1451.17	1681.28	1343.24	1644.29	1750.84	1166.84	3605.47	3532.44	4580.39	4264.93	4377.25	6153.06	8981.07	3932.96	3920.6	1823.92	4192.34	4813.44	3792.8	4905.1	2476.54	2322.37	1538.53	4229.67	1547.73	4062.65	2.74931	1.45907	3.08041e-10	7.29754e-08
ENSG00000100027.14_3	YPEL1	chr22	22051833	22090123	-	protein_coding_gene	157.75	359.663	329.408	250.489	224.388	414.25	334.523	199.563	471.164	548.998	1361.77	614.272	737.973	1211.88	1299.96	798.739	585.367	295.41	1182.43	522.38	1130.32	1018.53	1695.74	1007.97	283.754	905.181	289.948	903.355	3.19064	1.67384	3.15262e-10	7.40532e-08
ENSG00000158050.4_3	DUSP2	chr2	96808905	96811179	-	protein_coding_gene	2029.3	125.93	1798.39	366.716	58.6702	839.095	328.347	1937.83	312.681	76.5271	56.6116	136.626	230.121	75.1326	44.4974	148.22	115.712	98.813	90.7936	113.127	51.6333	148.309	38.1678	21.3268	935.535	109.894	602.906	94.8033	0.117471	-3.08962	3.13941e-10	7.40532e-08
ENSG00000198734.10_3	F5	chr1	169483404	169555826	-	protein_coding_gene	1697.72	640.143	568.896	504.986	1092.09	483.115	348.933	187.567	5157.1	9461.63	2922.19	4036.49	14744.6	8260.68	1100.78	1954.64	10515.1	5905.11	503.588	1934.25	1312.16	6826.58	8287.86	2091.15	690.432	5313.37	536.941	4596.79	7.69474	2.94387	3.16963e-10	7.41386e-08
ENSG00000137857.17_3	DUOX1	chr15	45422131	45457774	+	protein_coding_gene	614.152	508.489	869.814	661.292	586.702	474.639	371.578	500.543	131.712	43.2544	52.4944	73.2317	227.145	75.1326	8.4757	26.7619	27.2264	181.157	177.364	72.0907	47.1434	10.9051	37.0773	6.73477	573.401	74.8691	547.596	49.8189	0.130631	-2.93643	3.22683e-10	7.51593e-08
ENSG00000117650.12_3	NEK2	chr1	211831999	211848972	-	protein_coding_gene	19.1444	19.0803	4.45145	23.045	26.7619	11.6541	43.2307	19.6291	68.5329	57.6726	53.5237	61.2086	52.5707	115.138	211.893	199.685	81.6792	55.5823	47.5083	51.018	189.696	278.079	258.45	83.0622	20.8746	116.581	19.3868	75.106	5.59405	2.48389	3.24897e-10	7.53584e-08
ENSG00000171747.8_3	LGALS4	chr19	39292311	39304004	-	protein_coding_gene	227.435	52.4708	121.08	17.0333	46.3186	136.671	49.4065	23.9912	22.4874	13.3091	15.4395	21.8602	16.8623	23.4179	14.8325	6.17581	9.07546	23.674	9.50165	13.3091	10.1022	6.54305	33.8057	7.85723	84.3007	15.5158	50.9386	14.0708	0.183879	-2.44317	3.37804e-10	7.80256e-08
ENSG00000153446.15_3	C16orf89	chr16	5094123	5116111	-	protein_coding_gene	187.615	78.2291	126.421	115.225	125.575	78.4003	226.446	49.0728	46.0455	38.8181	20.586	34.9763	41.6598	32.1997	4.23785	18.5274	22.6887	49.4065	8.44591	42.1453	19.0819	39.2583	9.81457	12.3471	123.373	27.5149	120.4	27.4442	0.222999	-2.16489	3.58323e-10	8.23839e-08
ENSG00000149575.5_3	SCN2B	chr11	118032666	118047388	-	protein_coding_gene	85.001	55.3328	148.679	57.1116	83.3735	80.5192	113.223	31.6247	23.5582	12.2	8.23442	19.6742	46.6193	16.5877	5.29732	9.26372	12.4788	29.8498	9.50165	17.7454	11.2246	38.1678	3.27152	10.1022	81.8581	17.111	81.9463	12.3394	0.209244	-2.25674	3.59645e-10	8.23839e-08
ENSG00000284543.1_1	LINC01226	chr1	31971827	32048907	+	lncRNA	673.882	267.124	309.821	249.487	373.637	322.077	319.084	293.347	102.799	151.945	129.692	91.8129	152.753	157.095	36.0217	88.52	77.1414	181.157	177.364	96.4906	149.287	128.68	86.1501	41.5311	351.057	115.528	314.452	115.74	0.329058	-1.60359	3.74306e-10	8.53895e-08
ENSG00000248485.1_3	PCP4L1	chr1	161228517	161255240	+	protein_coding_gene	1078.21	181.263	312.492	194.38	189.392	188.584	250.12	218.102	96.3744	33.2726	43.2307	24.0462	95.2224	18.5392	8.4757	12.3516	27.2264	132.78	32.7279	102.036	57.2456	39.2583	19.6291	16.8369	326.568	47.4533	206.241	33.0003	0.145277	-2.78312	3.81191e-10	8.66037e-08
ENSG00000134757.4_3	DSG3	chr18	29027758	29058665	+	protein_coding_gene	993.976	75.3671	78.3456	32.0626	242.915	127.136	48.3772	34.8962	34.2664	11.0909	1.0293	12.0231	13.8866	9.75748	11.6541	11.3223	38.5707	51.4651	6.33443	35.4908	13.4695	26.1722	8.72406	6.73477	204.134	18.2495	76.8563	11.8386	0.0893001	-3.48519	3.94636e-10	8.89295e-08
ENSG00000164326.4_3	CARTPT	chr5	71014990	71016875	+	protein_coding_gene	274.147	142.148	631.216	98.1918	32.9377	48.7353	16.4688	1199.56	17.1332	14.4181	65.8753	31.6973	18.8461	5.85449	1.05946	1.0293	5.67217	19.5567	54.8984	5.54544	11.2246	13.0861	1.09051	6.73477	305.425	17.1076	120.17	12.1554	0.0560461	-4.15724	3.94523e-10	8.89295e-08
ENSG00000173404.4_3	INSM1	chr20	20348765	20351593	+	protein_coding_gene	7.65775	9.54014	6.23204	2.00391	1.0293	11.6541	12.3516	3.27152	41.7622	98.7088	130.721	71.0457	101.174	115.138	4.23785	1.0293	93.0235	97.7837	3.16722	106.472	159.39	64.34	53.4349	80.8173	6.71755	76.3904	6.94489	86.9204	11.359	3.50577	4.0965e-10	9.19392e-08
ENSG00000253368.3_4	TRNP1	chr1	27320198	27327389	+	protein_coding_gene	284.103	157.412	294.686	149.292	294.38	222.487	218.212	291.166	141.349	93.1634	84.4028	122.417	99.19	124.896	64.6272	79.2563	90.7546	192.48	141.469	93.1634	96.5317	75.245	110.141	81.9397	238.967	105.689	253.295	94.8476	0.442358	-1.17671	4.21225e-10	9.41556e-08
ENSG00000273046.1_4	AC012531.2	chr12	54410894	54429145	+	lncRNA	12.2524	8.58613	61.4301	52.1018	4.11721	123.957	58.6702	7.63355	23.5582	155.272	49.4065	332.275	407.671	84.89	683.354	390.106	910.95	523.915	883.654	545.671	328.881	343.51	693.563	444.495	41.0936	425.073	32.1771	398.888	10.3513	3.37173	4.38501e-10	9.76238e-08
ENSG00000143179.14_3	UCK2	chr1	165796768	165880855	+	protein_coding_gene	1917.5	1503.53	1163.61	1278.5	1702.47	1169.65	1450.29	1213.74	2871.96	2497.67	5016.82	2922.71	4729.38	4651.39	4689.18	4571.13	2804.32	2978.8	6050.44	1887.67	1967.68	2310.79	3415.47	2482.89	1424.91	3490.52	1364.39	2950.76	2.44956	1.29252	4.42677e-10	9.81592e-08
ENSG00000187210.12_3	GCNT1	chr9	79034766	79122332	+	protein_coding_gene	1307.18	2689.37	2285.38	2294.48	774.035	2548.01	3501.69	1282.44	12644.3	3502.5	15198.7	6217.04	18121	25153.8	25250.2	16366.9	10744.2	2036.99	7844.14	6331.78	3697.39	7260.6	4258.43	9580.21	2085.32	10888	2289.93	8712.18	5.22133	2.38442	4.48936e-10	9.91505e-08
ENSG00000256751.5_3	PLBD1-AS1	chr12	14720684	14772689	+	as_lncRNA	118.695	171.723	2264.9	142.278	422.014	723.613	212.036	478.733	62.1079	51.018	53.5237	98.3709	183.501	61.4721	14.8325	30.8791	40.8396	228.505	45.3968	63.218	41.5311	16.3576	41.4393	29.184	566.749	66.3861	317.025	48.2074	0.117178	-3.09322	4.61689e-10	1.01562e-07
ENSG00000244161.1_3	FLNB-AS1	chr3	58148274	58156363	-	as_lncRNA	8.42353	40.0686	13.3544	30.0587	14.4102	20.1298	16.4688	15.2671	22.4874	191.872	159.542	106.022	62.4897	113.187	621.905	156.454	38.5707	83.3735	123.521	49.9089	58.368	439.475	68.702	96.5317	19.7726	149.526	15.868	101.277	7.57031	2.92035	4.63766e-10	1.01616e-07
ENSG00000274964.1_4	AC026356.1	chr12	32492302	32493658	+	lncRNA	40.5861	152.642	66.7718	101.198	96.7544	97.4706	66.9046	30.5342	117.791	201.854	371.578	369.438	411.638	334.681	256.39	252.179	392.514	525.973	427.574	169.69	204.288	153.762	239.912	134.695	81.6077	285.247	81.8295	254.285	3.49724	1.80622	4.87904e-10	1.06484e-07
ENSG00000244355.7_4	LY6G6D	chr6	31683133	31685581	+	protein_coding_gene	45.9465	71.551	48.966	102.2	60.7288	50.8542	85.4321	47.9823	46.0455	9.98179	4.11721	6.55806	15.8704	6.83023	1.05946	1.0293	3.4033	17.4981	8.44591	9.98179	2.24492	7.63355	2.18102	4.48985	64.2076	9.21065	55.7915	6.69415	0.143689	-2.79898	5.07425e-10	1.1031e-07
ENSG00000260597.1_4	AC012531.1	chr12	54413694	54416373	+	lncRNA	2.29733	0.954014	13.3544	4.00783	2.0586	12.7136	5.14651	1.09051	2.14165	22.1818	10.293	41.5344	74.3925	11.709	79.4597	47.3479	156.552	74.1098	142.525	67.6543	33.6739	16.3576	122.137	48.2659	5.20284	59.3959	3.15258	47.8069	11.4128	3.51258	5.12525e-10	1.10984e-07
ENSG00000269420.5_3	PLA2G4C-AS1	chr19	48564628	48568202	+	as_lncRNA	4.59465	20.9883	1.78058	7.0137	3.08791	3.17839	5.14651	5.45254	37.4789	83.1816	287.175	76.5107	50.5869	109.284	174.811	20.586	15.8821	23.674	21.1148	38.8181	60.613	6.54305	26.1722	37.0412	6.40532	66.8421	4.87058	38.1485	10.4342	3.38324	5.8666e-10	1.24603e-07
ENSG00000226825.1_2	LINC01509	chr9	110182565	110193083	-	lncRNA	14.5497	47.7007	11.5738	43.0842	15.4395	12.7136	30.8791	16.3576	125.287	128.654	509.505	91.8129	186.477	192.222	354.92	203.802	52.1839	86.4614	255.489	16.6363	111.124	138.494	19.6291	158.267	24.0373	164.435	15.8986	133.574	6.84553	2.77516	5.8242e-10	1.24603e-07
ENSG00000171766.15_3	GATM	chr15	45653322	45694525	-	protein_coding_gene	1541.51	998.853	2412.69	655.28	775.065	1767.18	1153.85	983.638	530.059	468.035	268.648	592.412	787.568	516.17	262.747	489.948	509.36	557.882	323.056	626.635	565.721	374.044	384.949	280.616	1286.01	471.116	1076.35	499.654	0.366316	-1.44884	5.79589e-10	1.24603e-07
ENSG00000172819.16_3	RARG	chr12	53604351	53626764	-	protein_coding_gene	695.324	500.857	807.494	375.734	543.472	645.213	520.827	462.375	114.578	159.709	95.7251	158.487	316.416	234.179	167.395	84.4028	114.578	344.816	226.984	225.145	227.86	206.106	195.201	47.1434	568.912	182.42	532.149	181.298	0.320682	-1.64078	5.84841e-10	1.24603e-07
ENSG00000148600.14_3	CDHR1	chr10	85954391	85979377	+	protein_coding_gene	102.614	38.1606	49.8563	93.182	113.223	31.7839	54.553	91.6026	16.0624	13.3091	7.20512	20.7672	31.7408	8.78173	6.35678	8.23442	4.53773	44.26	22.1705	15.5272	4.48985	6.54305	14.1766	4.48985	71.8719	14.2908	73.0778	11.0454	0.199277	-2.32715	5.85231e-10	1.24603e-07
ENSG00000172638.12_3	EFEMP2	chr11	65633912	65641063	-	protein_coding_gene	817.848	785.153	1057.67	681.331	792.563	756.457	961.368	683.748	290.194	191.872	221.3	193.463	302.529	276.137	159.979	118.37	200.795	310.849	519.424	338.272	551.129	341.329	109.051	105.511	817.017	264.388	788.858	248.718	0.323591	-1.62776	6.13728e-10	1.29855e-07
ENSG00000198483.12_3	ANKRD35	chr1	145549209	145568526	+	protein_coding_gene	221.309	200.343	308.931	192.376	198.655	167.395	334.523	630.313	126.357	77.6361	53.5237	61.2086	144.817	64.3993	18.0109	36.0256	60.125	106.018	74.9575	93.1634	98.7767	66.521	23.9912	28.0616	281.731	70.8496	210.826	65.4602	0.251602	-1.99078	6.16512e-10	1.29948e-07
ENSG00000233515.1_2	LINC01518	chr10	43169645	43187171	-	lncRNA	11.4866	10.4942	2.67087	20.0391	4.11721	16.9514	5.14651	3.27152	4.28331	82.0725	24.7033	196.742	7.9352	27.3209	545.623	150.278	30.6297	296.439	20.059	5.54544	304.187	146.128	386.04	597.15	9.27218	176.571	7.82033	114.1	19.0375	4.25077	6.26847e-10	1.31626e-07
ENSG00000143845.14_3	ETNK2	chr1	204100190	204121131	-	protein_coding_gene	364.509	353.939	561.774	355.695	344.816	446.034	565.087	918.208	207.74	94.2725	124.546	118.045	158.704	253.694	150.444	64.846	69.2004	287.175	169.974	169.69	153.777	160.305	181.024	43.776	488.758	150.451	405.271	156.241	0.307977	-1.69911	6.42812e-10	1.34469e-07
ENSG00000167656.4_3	LY6D	chr8	143866296	143868008	-	protein_coding_gene	120.227	7.63211	23.1476	6.01174	15.4395	38.1407	14.4102	4.36203	4.28331	2.21818	1.0293	3.27903	0.9919	1.9515	2.11893	1.0293	2.26887	8.23442	3.16722	6.65453	2.24492	5.45254	2.18102	2.24492	28.6713	3.08437	14.9249	2.24492	0.106774	-3.22737	6.67322e-10	1.39071e-07
ENSG00000087077.13_3	TRIP6	chr7	100464760	100471076	+	protein_coding_gene	1137.94	742.223	1144.91	592.157	626.845	835.916	835.793	588.874	282.698	256.199	250.12	219.695	356.092	290.773	535.029	219.241	206.467	332.465	438.132	271.726	382.76	531.077	401.307	131.328	813.083	319.069	789.008	286.735	0.392362	-1.34974	6.70388e-10	1.39187e-07
ENSG00000166959.7_4	MS4A8	chr11	60467047	60483284	+	protein_coding_gene	62.0278	262.354	41.8437	28.0548	32.9377	109.125	116.311	67.6115	101.728	133.091	2983.95	466.715	848.074	1495.82	3358.5	215.124	861.035	287.175	346.282	513.508	460.209	1208.28	185.386	829.499	90.0331	893.399	64.8196	490.112	9.92363	3.31087	7.12608e-10	1.47401e-07
ENSG00000172005.10_3	MAL	chr2	95691422	95719741	+	protein_coding_gene	132.479	35.2985	23.1476	39.0763	171.893	27.546	37.0549	73.064	16.0624	15.5272	11.3223	2.18602	17.8542	9.75748	9.53517	27.7912	4.53773	20.586	12.6689	14.4181	15.7145	8.72406	2.18102	11.2246	67.445	12.5057	38.0656	11.9956	0.185597	-2.42976	7.3033e-10	1.50505e-07
ENSG00000114790.12_3	ARHGEF26	chr3	153838792	153975616	+	protein_coding_gene	2083.67	3626.21	5759.29	2494.87	5216.5	4363.93	4206.76	2087.23	5217.07	6602.4	5938.04	9621.77	9149.28	8412.9	16921.7	10840.6	9252.44	10951.8	11320.7	8724.08	10752.1	19650.9	7261.69	12772.5	3729.81	10211.9	3916.48	9437.1	2.73793	1.45308	7.43913e-10	1.52736e-07
ENSG00000200959.1	SNORA74A	chr5	138614470	138614667	+	snoRNA	1363.08	1630.41	1694.22	2882.63	745.215	1895.38	2252.11	1284.62	26839.2	11192.9	9201.96	2454.9	4736.32	5691.54	5829.17	15847.1	7842.34	7792.85	1310.17	5852.66	4655.97	10340.2	3904.02	8646.33	1718.46	8258.6	1662.32	6822.75	4.80585	2.26479	7.73156e-10	1.58155e-07
ENSG00000188086.13_3	PRSS45	chr3	46783582	46786245	-	protein_coding_gene	22.2075	12.4022	32.9408	25.0489	17.4981	15.8919	6.17581	31.6247	2.14165	2.21818	1.0293	10.9301	4.9595	4.87874	1.05946	10.293	1.13443	7.20512	4.22296	3.32726	1.12246	1.09051	2.18102	1.12246	20.4737	3.68226	19.8528	2.1996	0.180983	-2.46608	7.86583e-10	1.6031e-07
ENSG00000283189.2_3	AC104452.1	chr3	49454210	49466747	-	protein_coding_gene	967.174	1182.98	1370.16	1109.17	829.618	1196.13	1315.45	587.784	667.125	375.981	446.717	416.437	757.811	511.292	644.154	402.457	369.825	568.175	740.073	456.944	342.351	513.629	362.049	380.515	1069.81	497.221	1146.07	451.831	0.464825	-1.10524	7.91485e-10	1.60718e-07
ENSG00000104755.14_4	ADAM2	chr8	39601254	39695808	-	protein_coding_gene	50.5412	192.711	82.797	104.204	22.6446	559.397	99.8423	263.903	1817.19	365.999	24121.7	934.524	3423.05	763.035	1053.11	1141.5	10697.7	1288.69	3008.86	41.0362	7065.9	81.7881	9116.64	135.818	172.005	4066.03	102.023	1215.09	23.6434	4.56337	8.09118e-10	1.63363e-07
ENSG00000186807.9	ANXA8L2	chr10	47746936	47763041	+	protein_coding_gene	540.637	128.792	237.708	18.0352	51.4651	174.811	72.0512	123.227	14.9916	15.5272	6.17581	28.4183	24.7975	48.7874	4.23785	13.3809	39.7052	42.2014	9.50165	23.2908	33.6739	6.54305	3.27152	3.36739	168.341	19.867	126.01	15.2594	0.117993	-3.08323	8.10403e-10	1.63363e-07
ENSG00000173890.16_3	GPR160	chr3	169755717	169803191	+	protein_coding_gene	2410.66	6649.48	4471.04	6992.66	1811.57	5440.34	3568.59	2654.3	28768.8	12991.9	11824.6	14352.3	8015.54	12892.6	12369.2	14005.7	9371.55	8028.56	7146.3	9707.84	13890.5	21249.6	9376.19	23408.9	4249.83	13587.5	4019.82	12630.9	3.1972	1.67681	8.24467e-10	1.65595e-07
ENSG00000043355.11_3	ZIC2	chr13	100634026	100639027	+	protein_coding_gene	3.82888	2.86204	0.890291	24.047	1.0293	1.05946	3.08791	1.09051	26.7707	56.5635	46.3186	53.5575	33.7246	25.3694	389.882	136.897	96.4268	52.4944	9.50165	56.5635	20.2043	87.2406	81.7881	2.24492	4.73692	73.4718	1.97627	53.026	15.5169	3.95577	8.30689e-10	1.66243e-07
ENSG00000007062.11_3	PROM1	chr4	15964699	16086001	-	protein_coding_gene	1228.3	427.398	324.066	783.53	1155.91	159.979	707.131	419.845	114.578	227.363	26.7619	159.58	74.3925	60.4964	19.0703	146.161	40.8396	219.241	241.764	129.763	121.226	45.8013	45.8013	37.0412	650.77	106.868	567.264	94.4854	0.164204	-2.60644	8.64506e-10	1.72388e-07
ENSG00000270119.1	RP11-301J7.8	chr10	48249334	48262214	+	lncRNA	221.309	29.5744	64.9912	11.0215	16.4688	67.8056	24.7033	38.1678	11.7791	6.65453	4.11721	7.65107	8.9271	6.83023	1.05946	3.08791	14.7476	17.4981	11.6131	15.5272	10.1022	3.27152	3.27152	2.24492	59.2552	8.02393	33.8711	7.24065	0.134977	-2.88921	8.76503e-10	1.74154e-07
ENSG00000168938.5_3	PPIC	chr5	122358945	122372436	-	protein_coding_gene	840.055	987.404	853.789	1142.23	1119.88	812.608	956.222	1013.08	390.852	343.817	228.505	309.322	437.428	348.342	475.699	615.523	434.488	537.296	623.942	384.853	778.989	573.607	451.47	488.271	965.659	463.9	971.813	444.449	0.4804	-1.05769	8.84175e-10	1.74452e-07
ENSG00000242550.5_3	SERPINB10	chr18	61564408	61603345	+	protein_coding_gene	377.527	22.8963	38.2825	13.0254	23.674	39.2001	28.8205	34.8962	24.629	8.8727	4.11721	15.3021	6.9433	6.83023	5.29732	7.20512	5.67217	13.3809	6.33443	6.65453	12.3471	8.72406	3.27152	3.36739	72.2903	8.68432	31.8584	6.88677	0.119761	-3.06177	8.84296e-10	1.74452e-07
ENSG00000189377.8_3	CXCL17	chr19	42932440	42947200	-	protein_coding_gene	984.021	139.286	86.3582	72.1409	149.249	33.9028	159.542	164.667	34.2664	42.1453	4.11721	50.2785	31.7408	21.4664	2.11893	23.674	14.7476	44.26	8.44591	46.5817	25.8166	9.81457	5.45254	3.36739	223.646	23.0184	144.267	22.5702	0.102859	-3.28126	9.30464e-10	1.82262e-07
ENSG00000259905.5_2	PWRN1	chr15	24738284	24897277	+	lncRNA	1281.91	1636.13	229.695	367.718	2504.29	1946.23	129.692	152.671	64.2496	38.8181	58.6702	22.9532	226.153	422.499	29.665	26.7619	64.6627	135.868	13.7246	75.418	110.001	55.6159	14.1766	14.592	1031.04	85.8643	824.813	57.1431	0.0833184	-3.58522	9.28529e-10	1.82262e-07
ENSG00000100422.13_3	CERK	chr22	47080308	47134158	-	protein_coding_gene	1058.3	875.785	1143.13	960.877	1107.53	877.235	1484.25	1184.29	359.798	515.726	289.234	380.368	566.375	546.419	208.714	375.695	336.927	631.992	490.919	627.744	762.152	378.406	295.528	195.308	1086.43	435.081	1082.92	379.387	0.400494	-1.32015	9.35905e-10	1.82683e-07
ENSG00000189057.10_3	FAM111B	chr11	58874658	58894883	+	protein_coding_gene	101.082	134.516	102.383	192.376	192.48	162.098	168.806	80.6976	325.531	252.872	317.025	547.598	372.954	319.069	1534.1	457.01	225.752	488.919	461.358	245.108	738.58	875.678	553.978	1282.97	141.805	562.407	148.307	459.184	3.96703	1.98806	9.50161e-10	1.84815e-07
ENSG00000171848.14_4	RRM2	chr2	10260825	10271546	+	protein_coding_gene	42.1176	34.3445	24.0379	51.0998	68.9632	26.4866	171.893	22.9007	159.553	170.8	125.575	345.391	202.348	311.263	1125.15	305.703	178.106	186.304	245.987	87.6179	826.132	692.472	1134.13	177.349	55.2305	392.117	38.2311	224.167	7.10297	2.82842	9.81867e-10	1.90314e-07
ENSG00000146250.6_3	PRSS35	chr6	84222257	84235423	+	protein_coding_gene	78.1091	23.8503	30.2699	36.0705	66.9046	12.7136	22.6446	9.81457	7.49578	8.8727	2.0586	6.55806	4.9595	4.87874	5.29732	3.08791	9.07546	6.17581	6.33443	6.65453	12.3471	14.1766	6.54305	16.8369	35.0471	7.58453	27.0601	6.55055	0.21444	-2.22135	1.002e-09	1.93541e-07
ENSG00000112761.20_3	WISP3	chr6	112375275	112392172	+	protein_coding_gene	28.3337	33.3905	31.1602	15.0294	14.4102	13.773	67.9339	45.8013	12.8499	6.65453	1.0293	5.46505	13.8866	7.80598	1.05946	3.08791	5.67217	8.23442	9.50165	9.98179	6.73477	1.09051	4.36203	3.36739	31.229	6.29897	29.7469	6.16335	0.202265	-2.30568	1.05885e-09	2.0381e-07
ENSG00000225492.6_2	GBP1P1	chr1	89873238	89891802	+	pseudogene	150.092	132.608	156.691	370.724	369.52	219.309	205.86	345.691	104.941	62.1089	50.4358	99.4639	144.817	79.0356	38.1407	91.6079	77.1414	102.93	49.6197	147.509	44.8985	57.7969	53.4349	43.776	243.812	77.9786	212.585	69.6252	0.320122	-1.6433	1.06388e-09	2.04071e-07
ENSG00000224269.1_3	AP000697.1	chr21	38071073	38073864	-	as_lncRNA	5.36043	14.3102	2.67087	15.0294	5.14651	6.35678	9.26372	3.27152	31.054	34.3817	107.047	77.6037	19.838	25.3694	130.314	27.7912	19.2854	12.3516	71.7903	18.8545	66.2253	40.3488	32.7152	29.184	7.67617	46.5097	5.8586	31.8846	6.06809	2.60124	1.10834e-09	2.11865e-07
ENSG00000197632.8_3	SERPINB2	chr18	61538926	61571124	+	protein_coding_gene	528.385	22.8963	14.2447	12.0235	29.8498	50.8542	21.6153	33.8057	7.49578	14.4181	6.17581	18.5812	3.9676	10.7332	7.41624	12.3516	4.53773	13.3809	6.33443	8.8727	11.2246	2.18102	4.36203	2.24492	89.2093	8.39237	26.373	7.45601	0.0939011	-3.41271	1.12563e-09	2.14431e-07
ENSG00000169129.14_3	AFAP1L2	chr10	116054583	116164515	-	protein_coding_gene	1382.22	1157.22	3319.89	1034.02	1951.56	1772.48	1471.9	2078.51	512.926	424.781	343.787	240.462	1060.34	452.747	602.835	267.619	380.035	927.401	862.539	456.944	252.554	237.731	306.433	122.348	1770.98	465.718	1622.19	402.408	0.263003	-1.92685	1.13786e-09	2.15712e-07
ENSG00000198759.11_3	EGFL6	chrX	13587724	13651694	+	protein_coding_gene	79.6406	35.2985	40.9534	11.0215	47.3479	21.1893	16.4688	16.3576	10.7083	5.54544	6.17581	6.55806	13.8866	12.6847	3.17839	9.26372	6.8066	6.17581	12.6689	9.98179	11.2246	4.36203	5.45254	8.9797	33.5347	8.35331	28.2439	7.89315	0.248064	-2.01121	1.14211e-09	2.15712e-07
ENSG00000127241.16_4	MASP1	chr3	186935073	187009810	-	protein_coding_gene	1935.11	1523.56	2201.69	1422.78	4519.67	1252.29	1232.07	1968.37	599.663	492.435	270.706	278.718	695.322	416.644	149.384	228.505	235.962	853.292	1291.17	210.727	477.046	745.907	232.278	377.147	2006.94	472.182	1729.34	396.896	0.235286	-2.08751	1.14403e-09	2.15712e-07
ENSG00000108679.12_3	LGALS3BP	chr17	76967320	76976191	-	protein_coding_gene	3473.56	2556.76	3238.88	3280.41	3335.97	2970.73	2939.69	1616.13	883.432	548.998	626.845	631.76	1921.31	768.889	584.824	400.399	491.21	1099.29	2022.8	983.761	667.865	921.479	846.234	209.9	2926.52	850.562	3104.81	718.377	0.290652	-1.78263	1.19024e-09	2.23665e-07
ENSG00000095713.13_3	CRTAC1	chr10	99624757	99790585	-	protein_coding_gene	400.5	45.7927	89.0291	91.1781	78.227	47.6758	60.7288	193.02	54.6121	36.5999	41.1721	15.3021	25.7894	26.3452	6.35678	22.6446	28.3608	24.7033	38.0066	37.709	22.4492	23.9912	19.6291	16.8369	125.769	27.5318	83.628	25.2463	0.218616	-2.19353	1.2136e-09	2.27284e-07
ENSG00000130768.14_3	SMPDL3B	chr1	28261504	28285668	+	protein_coding_gene	99.5508	241.366	171.826	197.386	72.0512	201.298	312.908	257.36	597.521	361.563	1162.08	287.462	738.965	1144.55	2021.46	1120.91	444.698	314.966	1049.4	322.745	560.109	653.214	792.799	752.05	194.218	770.281	199.342	696.09	3.96764	1.98828	1.24958e-09	2.33235e-07
ENSG00000265763.3_3	ZNF488	chr10	48355089	48373866	+	protein_coding_gene	19.1444	22.8963	26.7087	20.0391	16.4688	11.6541	9.26372	15.2671	4.28331	5.54544	3.08791	5.46505	5.9514	4.87874	1.05946	5.14651	2.26887	13.3809	3.16722	8.8727	1.12246	5.45254	5.45254	4.48985	17.6803	4.97656	17.8066	5.01262	0.28094	-1.83166	1.25587e-09	2.33622e-07
ENSG00000214128.10_3	TMEM213	chr7	138482697	138522846	+	protein_coding_gene	30.631	25.7584	28.4893	9.01761	9.26372	36.0217	29.8498	53.4349	10.7083	16.6363	6.17581	4.37204	9.919	5.85449	2.11893	5.14651	9.07546	3.08791	7.39017	8.8727	3.36739	4.36203	3.27152	2.24492	27.8083	6.41272	29.1695	5.5005	0.230703	-2.11589	1.27388e-09	2.36178e-07
ENSG00000137726.16_3	FXYD6	chr11	117707691	117748201	-	protein_coding_gene	997.805	586.719	613.41	959.875	1748.78	450.272	745.215	233.369	215.236	292.799	285.117	145.37	302.529	170.756	72.0435	116.311	156.552	406.574	357.896	238.454	215.513	177.753	122.137	95.4093	791.931	210.653	679.313	196.494	0.266016	-1.91042	1.29744e-09	2.39745e-07
ENSG00000196154.11_3	S100A4	chr1	153516089	153522612	-	protein_coding_gene	2614.36	895.819	894.742	993.941	1257.81	638.856	1218.69	487.457	360.868	323.854	233.652	214.23	262.853	628.381	326.315	229.534	247.306	286.146	195.312	482.453	778.989	339.148	278.079	178.471	1125.21	335.35	944.88	282.113	0.297978	-1.74672	1.34265e-09	2.46456e-07
ENSG00000107485.15_3	GATA3	chr10	8095567	8117161	+	protein_coding_gene	312.436	454.111	567.115	182.356	378.783	290.293	315.996	573.607	79.2411	119.781	21.6153	90.7199	216.234	92.696	16.9514	97.7837	58.9905	199.685	65.4558	99.8179	59.4905	28.3532	38.1678	40.4086	384.337	82.837	347.39	72.3485	0.215635	-2.21334	1.34225e-09	2.46456e-07
ENSG00000260920.2_3	AL031985.3	chr1	40929991	40932439	+	lncRNA	34.4599	51.5168	53.4175	45.0881	49.4065	62.5083	45.2893	23.9912	95.3035	85.3998	114.253	114.766	101.174	108.308	202.357	159.542	114.578	71.0219	146.748	115.345	93.1644	182.115	42.5298	142.553	45.7097	118.072	47.3479	114.415	2.58401	1.36961	1.36884e-09	2.49766e-07
ENSG00000082014.16_3	SMARCD3	chr7	150935850	150974982	-	protein_coding_gene	711.405	643.005	770.992	750.466	863.585	838.035	1180.61	1348.96	343.735	333.835	267.619	313.694	434.452	488.85	92.1733	154.395	239.365	429.219	360.007	363.781	432.148	254.088	286.804	102.144	888.382	306.019	804.514	323.765	0.344546	-1.53723	1.37485e-09	2.49766e-07
ENSG00000284554.1_2	AL022318.4	chr22	39410368	39429281	+	protein_coding_gene	735.144	623.925	1188.54	592.157	741.098	1359.29	1069.45	1229	381.214	269.508	125.575	193.463	417.59	214.664	77.3408	128.663	111.174	376.725	257.6	607.78	169.492	126.499	98.1457	74.0825	942.325	226.845	905.271	181.477	0.240756	-2.05435	1.37243e-09	2.49766e-07
ENSG00000116983.12_3	HPCAL4	chr1	40144320	40157361	-	protein_coding_gene	49.7754	3.81606	7.12233	46.09	76.1684	14.8325	10.293	22.9007	5.35413	2.21818	3.08791	5.46505	4.9595	6.83023	4.23785	4.11721	2.26887	6.17581	4.22296	2.21818	4.48985	9.81457	6.54305	1.12246	28.8748	4.57036	18.8666	4.36385	0.158605	-2.65649	1.3787e-09	2.49766e-07
ENSG00000221857.7_4	AC020907.2	chr19	35629728	35642239	+	lncRNA	394.374	194.619	219.012	240.47	310.849	158.919	275.853	51.2539	66.3912	46.5817	89.5493	32.7903	52.5707	55.6176	14.8325	30.8791	57.8561	63.8167	127.744	76.5271	80.8173	89.4216	20.7196	44.8985	230.669	59.4384	229.741	56.7369	0.257562	-1.95701	1.42382e-09	2.57099e-07
ENSG00000100033.16_3	PRODH	chr22	18900290	18924066	-	protein_coding_gene	104.145	68.689	92.5902	59.1155	64.846	78.4003	20.586	31.6247	16.0624	11.0909	14.4102	12.0231	15.8704	17.5635	7.41624	6.17581	10.2099	49.4065	15.8361	9.98179	22.4492	14.1766	13.0861	1.12246	64.9997	14.8051	66.7675	13.6313	0.227846	-2.13387	1.46422e-09	2.63536e-07
ENSG00000185614.4_3	FAM212A	chr3	49840687	49842463	+	protein_coding_gene	70.4513	119.252	146.008	74.1448	49.4065	111.244	129.692	47.9823	10.7083	33.2726	24.7033	12.0231	26.7813	34.1512	6.35678	3.08791	20.4198	41.1721	22.1705	47.6908	31.4289	20.7196	19.6291	8.9797	93.5225	22.7059	92.6942	21.4451	0.242787	-2.04224	1.47701e-09	2.64978e-07
ENSG00000178038.16_3	ALS2CL	chr3	46710487	46735194	-	protein_coding_gene	722.892	353.939	498.563	120.235	332.465	474.639	344.816	298.799	63.1787	113.127	77.1977	195.649	165.647	192.222	132.433	53.5237	76.007	204.831	115.076	118.672	161.635	93.7837	104.689	53.8782	393.294	120.097	349.378	114.101	0.30533	-1.71156	1.51766e-09	2.71392e-07
ENSG00000129194.7_3	SOX15	chr17	7491496	7493488	-	protein_coding_gene	113.335	36.2525	50.7466	22.0431	27.7912	38.1407	34.9963	34.8962	19.2749	12.2	7.20512	6.55806	12.8947	10.7332	4.23785	4.11721	6.8066	22.6446	20.059	19.9636	11.2246	6.54305	6.54305	5.61231	44.7752	11.0386	35.6244	8.96917	0.245691	-2.02508	1.58222e-09	2.82028e-07
ENSG00000105270.14_3	CLIP3	chr19	36505562	36524245	-	protein_coding_gene	221.309	104.942	201.206	152.297	346.875	107.006	183.216	95.9647	53.5413	75.418	67.9339	45.9064	124.979	58.5449	46.6164	49.4065	60.125	83.3735	84.4591	60.9998	56.1231	76.3355	54.5254	26.9391	176.602	64.0767	167.757	59.3349	0.362929	-1.46224	1.61068e-09	2.85265e-07
ENSG00000263426.1	RN7SL471P	chr6	28945252	28945547	+	misc_RNA	147.795	121.16	413.095	96.1879	86.4614	192.822	615.523	50.1634	16.0624	117.563	15.4395	28.4183	6.9433	11.709	22.2487	11.3223	53.3184	13.3809	22.1705	56.5635	30.3065	10.9051	21.8102	3.36739	215.401	27.5956	134.477	18.9363	0.127948	-2.96637	1.60727e-09	2.85265e-07
ENSG00000124157.6_3	SEMG2	chr20	43849941	43853099	+	protein_coding_gene	28.3337	443.616	309.821	3.00587	7.20512	27.546	20.586	270225	17.1332	308.326	31.9084	110.394	5.9514	144.411	22.2487	7.20512	6.8066	9.26372	9.50165	28.8363	250.309	9.81457	58.8874	807.05	33883.1	114.253	27.9399	25.5425	0.00337223	-8.21208	1.63551e-09	2.8874e-07
ENSG00000119888.10_3	EPCAM	chr2	47572297	47614740	+	protein_coding_gene	2651.11	6336.56	5291.89	3849.52	2532.08	4540.86	3980.31	5497.25	14285.9	12925.3	14537.9	10906.1	8478.76	18193.8	17149.5	7326.57	5507.67	7681.68	8369.9	8566.59	5882.82	12897.4	12928	12302.2	4334.95	11121.3	4260.59	11604.1	2.56553	1.35926	1.64511e-09	2.89514e-07
ENSG00000253688.2_4	AC026904.3	chr8	49464087	49469001	-	lncRNA	13.784	21.9423	12.4641	24.047	16.4688	8.4757	13.3809	9.81457	9.63744	3.32726	3.08791	3.27903	6.9433	3.90299	1.05946	5.14651	7.94103	5.14651	4.22296	2.21818	3.36739	3.27152	3.27152	2.24492	15.0472	4.25425	13.5824	3.34732	0.28298	-1.82123	1.68962e-09	2.96406e-07
ENSG00000244274.7_3	DBNDD2	chr20	44034697	44039250	+	protein_coding_gene	751.991	537.11	783.456	421.824	531.12	648.391	774.035	888.764	342.664	277.272	167.776	205.486	320.384	301.506	100.649	116.311	228.021	310.849	329.391	267.29	416.433	247.545	162.486	96.5317	667.086	243.162	700.191	257.418	0.364521	-1.45592	1.74132e-09	3.04512e-07
ENSG00000148908.14_3	RGS10	chr10	121259340	121302220	-	protein_coding_gene	1235.96	1763.02	1352.35	1922.76	1099.29	1670.77	1726.14	962.918	3389.17	3003.41	3943.26	2965.34	2962.8	4589.92	1593.43	3364.79	4086.23	2416.8	1779.98	5050.79	3851.17	2476.54	3970.54	2835.34	1466.65	3267.47	1511.56	3184.1	2.22786	1.15566	1.75023e-09	3.05107e-07
ENSG00000206337.10_3	HCP5	chr6	31368479	31445283	+	lncRNA	2052.28	1993.89	1872.28	2298.49	2092.57	2006.62	2793.53	3119.94	1051.55	1008.16	975.779	1119.24	1773.52	1206.02	1612.5	1084.88	951.789	1454.4	1265.83	1467.32	1248.18	1434.02	1340.23	709.396	2278.7	1231.43	2072.42	1227.1	0.540481	-0.887685	1.77098e-09	3.07757e-07
ENSG00000136158.11_3	SPRY2	chr13	80910111	80915086	-	protein_coding_gene	690.729	684.982	762.089	853.667	832.706	555.159	746.244	523.444	402.631	364.89	306.732	330.089	420.566	376.639	226.725	232.622	304.028	502.299	579.601	410.362	240.207	386.04	375.135	288.473	706.127	359.19	718.487	370.012	0.508698	-0.975118	1.78356e-09	3.08973e-07
ENSG00000146555.18_3	SDK1	chr7	3341080	4308632	+	protein_coding_gene	4067.03	4225.33	2441.18	5354.46	18591.3	2910.35	2157.42	2694.64	21677.8	23777.7	72293	30761.7	115754	23782.9	16244.7	39498.4	79301.4	150948	15446.5	3146.48	16821.2	4473.26	51723.9	98995.5	5305.21	47790.4	3488.69	27272.3	9.00825	3.17125	1.80477e-09	3.10748e-07
ENSG00000107984.9_3	DKK1	chr10	54074056	54077802	+	protein_coding_gene	4832.04	155.504	268.868	173.339	243.945	261.687	152.337	459.104	164.907	29.9454	8.23442	165.045	101.174	99.5263	15.8919	111.165	24.9575	74.1098	22.1705	97.5997	55.0006	40.3488	17.4481	10.1022	818.353	64.8516	252.816	47.6747	0.0792441	-3.65755	1.80501e-09	3.10748e-07
ENSG00000236699.8_3	ARHGEF38	chr4	106473777	106629250	+	protein_coding_gene	4026.45	9456.19	8925.17	16367	8323.97	13246.5	8838.62	5007.61	30447.9	22232.8	38208.7	49018.2	68679.1	28895.8	13147.9	51917	48983.7	38240.6	49294.6	25367.1	18820.3	16053.4	9098.11	33029.6	9273.93	33839.7	8881.89	31738.7	3.64893	1.86747	1.81903e-09	3.12191e-07
ENSG00000088726.15_4	TMEM40	chr3	12775024	12810956	-	protein_coding_gene	639.422	157.412	179.839	45.0881	63.8167	133.492	68.9632	125.408	74.9578	15.5272	10.293	24.0462	60.5059	26.3452	4.23785	16.4688	17.0165	32.9377	19.0033	34.3817	8.9797	5.45254	6.54305	4.48985	176.68	22.5742	129.45	16.7427	0.127791	-2.96814	1.86672e-09	3.19388e-07
ENSG00000244509.3_3	APOBEC3C	chr22	39410088	39416357	+	protein_coding_gene	602.665	504.673	1037.19	488.955	612.435	1231.1	813.149	1047.98	326.602	196.309	84.4028	147.556	288.643	159.047	55.0921	82.3442	88.4858	267.619	224.872	550.107	126.838	102.508	75.245	59.4905	792.267	177.198	712.792	137.197	0.223677	-2.16051	1.88865e-09	3.22146e-07
ENSG00000171612.6_3	SLC25A33	chr1	9599541	9645237	+	protein_coding_gene	889.831	1376.64	714.904	1060.07	820.354	1018.14	836.823	824.424	1495.94	1257.71	2043.16	1464.63	1743.76	1656.82	2658.19	1853.77	1470.23	1454.4	1716.63	1192.27	2213.5	2020.71	2574.69	2142.78	942.649	1809.95	863.327	1730.2	1.92009	0.941174	1.91972e-09	3.26441e-07
ENSG00000160801.13_3	PTH1R	chr3	46919236	46945289	+	protein_coding_gene	88.0641	72.5051	84.5776	108.211	204.831	103.827	109.106	91.6026	24.629	24.3999	37.0549	18.5812	50.5869	39.0299	11.6541	12.3516	15.8821	61.7581	45.3968	21.0727	61.7354	39.2583	28.3532	13.4695	107.841	31.5758	97.715	26.4911	0.293266	-1.76972	1.93093e-09	3.27342e-07
ENSG00000167107.12_3	ACSF2	chr17	48503519	48552206	+	protein_coding_gene	679.243	829.038	1045.2	569.112	1057.09	928.09	910.932	1203.92	231.298	336.054	153.366	248.113	543.561	361.027	200.239	99.8423	206.467	679.339	322	253.981	211.023	199.563	150.49	87.552	902.829	267.745	919.511	221.161	0.296641	-1.75321	1.94714e-09	3.29085e-07
ENSG00000100206.9_3	DMC1	chr22	38914954	38966291	-	protein_coding_gene	176.128	125.93	125.531	129.252	169.835	123.957	131.751	85.0596	86.7369	72.0907	27.7912	43.7204	62.4897	48.7874	23.3082	27.7912	36.3019	51.4651	24.282	93.1634	37.0412	41.4393	25.0817	19.0819	133.43	45.0358	127.591	39.2403	0.33734	-1.56772	1.95438e-09	3.29305e-07
ENSG00000169314.14_4	C22orf15	chr22	24105208	24108048	+	protein_coding_gene	9.1893	8.58613	6.23204	7.0137	11.3223	12.7136	15.4395	16.3576	2.14165	4.43635	2.0586	1.09301	2.9757	3.90299	1.05946	1.0293	1.13443	2.0586	3.16722	6.65453	4.48985	1.09051	2.18102	1.12246	10.8568	2.53723	10.2558	2.10013	0.235778	-2.0845	1.98446e-09	3.32879e-07
ENSG00000105929.15_3	ATP6V0A4	chr7	138391040	138484305	-	protein_coding_gene	134.011	75.3671	109.506	25.0489	11.3223	111.244	73.0805	116.684	37.4789	26.6181	21.6153	39.3484	10.9109	21.4664	10.5946	26.7619	12.4788	17.4981	11.6131	14.4181	5.61231	14.1766	13.0861	12.3471	82.0329	18.5016	92.4364	14.2974	0.225468	-2.14901	1.98761e-09	3.32879e-07
ENSG00000050165.17_3	DKK3	chr11	11984653	12031316	-	protein_coding_gene	4564.79	2819.11	4106.91	3682.19	6416.67	3165.68	3786.8	3190.83	1649.07	941.615	1209.43	1058.03	1655.48	1791.47	1422.86	1892.89	1093.59	1700.41	1861.27	1268.8	2506.46	3046.88	690.291	973.175	3966.62	1547.61	3734.5	1535.97	0.39016	-1.35786	2.05196e-09	3.42622e-07
ENSG00000012171.19_3	SEMA3B	chr3	50304990	50314977	+	protein_coding_gene	804.83	318.641	517.259	239.468	331.435	424.845	396.281	443.837	162.766	151.945	160.571	119.138	177.55	229.301	245.795	110.135	169.031	213.066	290.328	99.8179	144.798	255.179	127.589	115.614	434.574	173.289	410.563	161.668	0.398655	-1.32679	2.09025e-09	3.47967e-07
ENSG00000171053.9_3	PATE1	chr11	125616188	125619762	+	protein_coding_gene	6.1262	12.4022	4.45145	1.00196	3.08791	3.17839	4.11721	3971.63	4.28331	25.509	2.0586	1.09301	0.9919	0.975748	1.05946	2.0586	2.26887	1.0293	1.05574	1.10909	5.61231	3.27152	2.18102	28.0616	500.749	5.16369	4.28433	2.0586	0.0102931	-6.60218	2.1231e-09	3.52378e-07
ENSG00000132702.12_3	HAPLN2	chr1	156589086	156595517	+	protein_coding_gene	42.8834	24.8044	56.9786	22.0431	36.0256	34.9623	31.9084	20.7196	20.3457	12.2	12.3516	8.74408	8.9271	8.78173	5.29732	4.11721	15.8821	19.5567	16.8918	11.0909	5.61231	5.45254	6.54305	3.36739	33.7907	10.3226	33.4353	8.85441	0.304742	-1.71434	2.14503e-09	3.53898e-07
ENSG00000279458.2_4	AC244230.1	chr10	47741976	47753885	+	lncRNA	268.787	58.1949	129.092	8.01566	20.586	94.2922	32.9377	63.2494	6.42496	7.76361	3.08791	15.3021	13.8866	21.4664	1.05946	6.17581	15.8821	25.7326	3.16722	14.4181	16.8369	5.45254	2.18102	2.24492	84.3944	10.0676	60.7221	7.09429	0.119237	-3.06809	2.13927e-09	3.53898e-07
ENSG00000189419.6_2	SPATA41	chr15	100884662	100889860	-	lncRNA	38.2888	28.6204	47.1854	37.0724	39.1135	42.3785	46.3186	157.033	14.9916	15.5272	15.4395	14.2091	12.8947	17.5635	14.8325	14.4102	7.94103	29.8498	14.7803	13.3091	17.9594	31.6247	8.72406	13.4695	54.5013	16.0954	40.746	14.8064	0.296404	-1.75437	2.1993e-09	3.60705e-07
ENSG00000109846.7_3	CRYAB	chr11	111779289	111794446	-	protein_coding_gene	1664.03	600.075	736.271	893.746	937.694	1244.87	956.222	2492.9	522.563	258.417	356.139	287.462	646.719	171.732	59.3299	96.7544	215.542	360.256	453.968	218.49	278.371	315.157	81.7881	211.023	1190.73	283.357	946.958	268.394	0.237994	-2.071	2.19558e-09	3.60705e-07
ENSG00000251381.7_2	LINC00958	chr11	12983389	13011095	-	lncRNA	357.617	103.034	184.29	25.0489	174.981	253.212	34.9963	286.804	25.6998	23.2908	15.4395	24.0462	39.676	55.6176	2.11893	8.23442	17.0165	66.9046	21.1148	12.2	20.2043	4.36203	4.36203	2.24492	177.498	21.4083	179.636	18.6104	0.120774	-3.04962	2.27152e-09	3.71451e-07
ENSG00000214772.2_3	AC010168.1	chr12	14818589	14910897	+	as_lncRNA	150.858	165.998	2021.85	134.262	616.552	848.63	162.63	267.174	95.3035	73.1998	40.1428	79.7898	218.218	31.2239	9.53517	39.1135	46.5118	207.919	31.6722	52.1271	32.5514	22.9007	46.8918	34.7963	545.994	66.3685	216.586	43.3273	0.121594	-3.03986	2.29873e-09	3.74794e-07
ENSG00000129757.12_3	CDKN1C	chr11	2904443	2907111	-	protein_coding_gene	366.806	664.948	511.917	434.849	293.351	548.802	331.435	230.097	161.695	99.8179	136.897	110.394	126.963	193.198	79.4597	68.9632	58.9905	165.718	247.043	97.5997	271.636	161.395	176.662	188.574	422.776	146.563	400.828	149.146	0.346641	-1.52849	2.31151e-09	3.75774e-07
ENSG00000109956.12_3	B3GAT1	chr11	134248398	134281812	-	protein_coding_gene	76.5775	366.341	126.421	371.726	358.197	214.012	420.985	143.947	785.986	860.652	1753.93	1362.98	1586.05	1129.92	848.63	2546.49	110.04	479.655	2705.86	1208.91	682.457	1428.57	1011.99	1119.09	259.776	1226.33	286.104	1124.51	4.72196	2.23939	2.34488e-09	3.79998e-07
ENSG00000162882.14_3	HAAO	chr2	42994229	43019733	-	protein_coding_gene	307.842	220.377	319.614	310.607	533.179	240.498	357.168	294.437	113.508	97.5997	81.3149	100.557	184.493	86.8415	31.7839	45.2893	54.4528	201.743	96.0723	106.472	114.491	50.1634	25.0817	31.4289	322.965	88.8308	309.224	91.4569	0.275178	-1.86156	2.35121e-09	3.79998e-07
ENSG00000114346.13_3	ECT2	chr3	172468472	172539264	+	protein_coding_gene	707.576	1190.61	679.292	1289.52	1467.78	935.506	864.614	742.636	4162.3	1897.65	2581.49	2001.3	1827.08	2326.18	2663.49	2644.28	1261.49	2068.9	1428.41	1365.29	3576.16	4063.23	3553.96	2695.03	984.692	2507.27	900.06	2453.84	2.54642	1.34847	2.39223e-09	3.85504e-07
ENSG00000052802.12_3	MSMO1	chr4	166248775	166264312	+	protein_coding_gene	6630.08	13195	9256.35	9575.7	5240.18	12816.3	5651.9	7404.55	3969.55	2170.48	3390.52	5209.29	4009.26	3309.74	2264.07	2731.77	2679.53	5248.41	4871.18	2726.14	4322.6	4331.5	1664.11	2125.94	8721.26	3439.01	8330.45	3350.13	0.394329	-1.34253	2.44613e-09	3.93046e-07
ENSG00000266964.5_3	FXYD1	chr19	35629712	35634013	+	protein_coding_gene	388.248	190.803	208.328	232.454	301.586	155.741	262.472	45.8013	57.8246	38.8181	83.3735	32.7903	49.595	50.7389	11.6541	25.7326	52.1839	58.6702	122.466	74.3089	76.3274	88.3311	18.5386	42.6536	223.179	55.2504	220.391	51.4614	0.247447	-2.01481	2.47414e-09	3.96399e-07
ENSG00000168765.16_3	GSTM4	chr1	110198703	110217458	+	protein_coding_gene	481.673	704.062	831.532	649.268	1097.24	674.878	724.629	467.828	300.902	267.29	330.406	219.695	389.817	303.458	294.531	234.681	196.257	505.387	395.902	269.508	187.451	153.762	150.49	104.389	703.888	268.995	689.47	268.399	0.38229	-1.38726	2.60161e-09	4.1562e-07
ENSG00000122691.12_3	TWIST1	chr7	19060614	19157295	-	protein_coding_gene	192.975	65.827	48.966	144.282	116.311	49.7948	49.4065	105.779	237.723	292.799	387.018	647.062	680.443	410.79	3604.29	415.838	3185.49	440.541	84.4591	322.745	168.369	343.51	598.689	1515.32	96.6677	833.443	85.8031	413.314	8.61847	3.10743	2.63423e-09	4.16035e-07
ENSG00000273213.1_4	AC239798.4	chr1	149398877	149400540	-	lncRNA	83.4695	272.848	478.086	119.233	127.633	115.481	213.066	151.581	103.87	36.5999	28.8205	59.0226	62.4897	40.9814	98.5301	34.9963	46.5118	63.8167	47.5083	69.8725	38.1637	95.9647	30.5342	35.9188	195.175	55.8501	139.607	47.01	0.286082	-1.8055	2.61505e-09	4.16035e-07
ENSG00000135406.13_3	PRPH	chr12	49687035	49692469	+	protein_coding_gene	62.0278	6.6781	27.599	16.0313	27.7912	15.8919	12.3516	10.9051	3.21248	4.43635	3.08791	2.18602	7.9352	4.87874	3.17839	3.08791	6.8066	3.08791	2.11148	5.54544	10.1022	8.72406	3.27152	1.12246	22.4095	4.54841	15.9616	3.242	0.201037	-2.31447	2.63091e-09	4.16035e-07
ENSG00000057149.15_3	SERPINB3	chr18	61322431	61329197	-	protein_coding_gene	566.674	15.2642	50.7466	159.311	379.813	26.4866	41.1721	936.746	35.3373	8.8727	3.08791	33.8833	43.6436	8.78173	4.23785	56.6116	3.4033	25.7326	5.2787	62.1089	16.8369	9.81457	11.9956	10.1022	272.027	21.233	105.029	11.0489	0.0780781	-3.67894	2.63156e-09	4.16035e-07
ENSG00000125998.7_3	FAM83C	chr20	33873534	33880204	-	protein_coding_gene	85.001	6.6781	24.0379	7.0137	3.08791	8.4757	5.14651	4.36203	1.07083	1.10909	1.0293	2.18602	1.9838	1.9515	1.05946	1.0293	1.13443	4.11721	1.05574	4.43635	1.12246	1.09051	1.09051	1.12246	17.9754	1.66181	6.8459	1.11577	0.0916366	-3.44793	2.74026e-09	4.31552e-07
ENSG00000227300.12_2	KRT16P2	chr17	16733313	16736144	-	pseudogene	274.913	3.81606	0.890291	2.00391	5.14651	6.35678	2.0586	11.9956	1.07083	4.43635	1.0293	1.09301	0.9919	0.975748	1.05946	3.08791	1.13443	3.08791	2.11148	1.10909	1.12246	1.09051	1.09051	1.12246	38.3976	1.60083	4.48128	1.10105	0.0415471	-4.58911	2.77432e-09	4.35678e-07
ENSG00000227959.1_3	AL451042.2	chr1	16481706	16483824	+	as_lncRNA	268.021	19.0803	4.45145	3.00587	10.293	14.8325	10.293	3.27152	5.35413	2.21818	2.0586	3.27903	1.9838	2.92724	1.05946	4.11721	7.94103	2.0586	4.22296	1.10909	1.12246	2.18102	1.09051	1.12246	41.6561	2.74036	10.293	2.11981	0.0654918	-3.93254	2.79347e-09	4.37447e-07
ENSG00000101342.9_3	TLDC2	chr20	35504524	35522638	+	protein_coding_gene	39.0545	69.643	51.6369	40.0783	37.0549	45.5569	47.3479	27.2627	10.7083	18.8545	24.7033	25.1392	10.9109	24.3937	5.29732	8.23442	7.94103	16.4688	10.5574	24.3999	15.7145	11.9956	7.63355	24.6942	44.7044	15.4779	42.8176	13.855	0.345907	-1.53154	2.81952e-09	4.40282e-07
ENSG00000124233.11_3	SEMG1	chr20	43835638	43838413	+	protein_coding_gene	24.5048	806.142	716.684	2.00391	9.26372	26.4866	25.7326	308096	21.4165	530.144	38.0842	50.2785	2.9757	79.0356	66.7462	4.11721	13.6132	23.674	9.50165	12.2	355.82	25.0817	41.4393	1620.84	38713.3	180.935	26.1096	31.5829	0.00467358	-7.74126	2.92573e-09	4.55584e-07
ENSG00000132821.11_3	VSTM2L	chr20	36531506	36573752	+	protein_coding_gene	209.057	228.963	129.982	219.429	108.077	232.022	287.175	330.424	415.481	318.308	1933.03	1657	577.286	445.917	2311.75	460.098	2646.63	255.267	1006.12	1247.72	1568.08	694.653	621.589	569.088	218.141	1045.5	224.196	658.121	4.79335	2.26103	2.95044e-09	4.5593e-07
ENSG00000178773.14_3	CPNE7	chr16	89642176	89663654	+	protein_coding_gene	54.37	64.8729	55.198	36.0705	12.3516	32.8434	56.6116	30.5342	101.728	68.7634	400.399	83.0688	84.3115	92.696	144.087	168.806	240.5	107.047	156.249	117.563	111.124	304.252	282.442	142.553	42.8565	162.849	45.2202	130.058	3.79285	1.92328	2.94618e-09	4.5593e-07
ENSG00000250685.7_3	AC009123.1	chr16	84226164	84230659	-	as_lncRNA	84.2353	95.4014	143.337	43.0842	64.846	84.757	51.4651	27.2627	11.7791	4.43635	4.11721	7.65107	22.8137	11.709	1.05946	1.0293	7.94103	41.1721	19.0033	13.3091	3.36739	3.27152	2.18102	1.12246	74.2986	9.74769	74.5407	6.04371	0.131526	-2.92658	2.95263e-09	4.5593e-07
ENSG00000188373.4_3	C10orf99	chr10	85933494	85945050	+	protein_coding_gene	85.7668	19.0803	12.4641	9.01761	5.14651	2.11893	6.17581	18.5386	2.14165	2.21818	1.0293	1.09301	1.9838	2.92724	1.05946	2.0586	3.4033	6.17581	1.05574	1.10909	3.36739	1.09051	1.09051	3.36739	19.7886	2.19819	10.7408	2.0212	0.110163	-3.18228	2.97223e-09	4.57683e-07
ENSG00000168490.13_3	PHYHIP	chr8	22077217	22089854	-	protein_coding_gene	257.3	71.551	247.501	58.1135	92.6372	128.195	83.3735	128.68	62.1079	19.9636	18.5274	36.0693	48.6031	41.9571	11.6541	13.3809	23.8231	50.4358	25.3377	19.9636	58.368	40.3488	9.81457	7.85723	133.419	30.5133	110.416	24.5804	0.228619	-2.12898	3.01897e-09	4.63592e-07
ENSG00000223345.3_2	HIST2H2BA	chr1	120906101	120915073	+	pseudogene	226.669	461.743	710.452	264.517	423.043	382.466	242.915	490.728	206.669	95.3815	145.132	88.5338	311.457	61.4721	143.028	68.9632	150.88	112.194	175.253	92.0543	86.4296	146.128	95.9647	60.613	400.317	127.509	402.755	104.079	0.318618	-1.6501	3.05878e-09	4.68407e-07
ENSG00000255245.4_3	FXYD6-FXYD2	chr11	117690878	117747382	-	protein_coding_gene	1025.37	621.063	655.254	998.951	1869.21	483.115	800.797	250.817	222.732	312.763	320.113	161.766	320.384	177.586	79.4597	119.399	165.627	462.157	383.233	261.745	236.839	183.205	130.861	104.389	838.073	227.641	728.026	202.969	0.271641	-1.88023	3.07757e-09	4.69986e-07
ENSG00000107105.14_3	ELAVL2	chr9	23690102	23826335	-	protein_coding_gene	153.921	205.113	397.96	241.472	78.227	565.753	79.2563	66.521	683.187	1376.38	1878.48	1536.77	1351.96	775.719	880.414	2250.05	1388.55	66.9046	1884.49	4799.02	746.437	379.497	5203.9	1488.38	223.528	1668.13	179.517	1382.46	7.46257	2.89967	3.13604e-09	4.76349e-07
ENSG00000039139.9_3	DNAH5	chr5	13690440	13944652	-	protein_coding_gene	697.621	4940.84	438.023	5860.45	1262.95	1500.2	1463.67	1366.41	5598.28	13677.3	13997.5	7676.21	9497.44	10561.5	33830.8	45525	17757.3	22845.4	38593.6	4092.53	3124.93	10658.6	2567.06	17111.9	2191.27	16069.7	1415.04	12167.9	7.33361	2.87452	3.14768e-09	4.76349e-07
ENSG00000221170.1	MIR1304	chr11	93466840	93466930	-	miRNA	78.1091	83.9532	88.1388	83.1624	115.282	94.2922	73.0805	41.4393	186.324	170.8	192.48	181.44	135.89	140.508	120.779	155.425	117.981	153.366	153.082	140.854	134.695	102.508	160.305	154.9	82.1822	150.083	83.5578	153.224	1.82527	0.868108	3.15657e-09	4.76349e-07
ENSG00000263874.2_3	LINC00672	chr17	37081421	37085637	+	protein_coding_gene	101.082	95.4014	194.974	179.35	153.366	114.422	162.63	23.9912	92.0911	33.2726	29.8498	31.6973	38.6841	44.8844	18.0109	27.7912	32.8986	40.1428	32.7279	67.6543	19.0819	37.0773	32.7152	38.1637	128.152	38.5464	133.894	33.0856	0.30072	-1.73351	3.1622e-09	4.76349e-07
ENSG00000135480.15_3	KRT7	chr12	52626304	52645970	+	protein_coding_gene	3291.3	694.522	1063.01	282.552	927.401	1680.31	828.588	1842.96	318.035	474.69	33.967	424.088	216.234	325.9	56.1515	179.099	167.896	362.314	282.938	279.49	144.798	101.417	68.702	32.5514	1326.33	216.767	995.204	197.666	0.16343	-2.61325	3.15579e-09	4.76349e-07
ENSG00000114631.10_3	PODXL2	chr3	127348024	127391652	+	protein_coding_gene	570.502	1268.84	991.784	894.748	479.655	1131.51	1102.38	279.17	1873.95	1628.14	2882.05	1449.33	1740.78	2390.58	2426.17	1508.96	2045.38	1336.03	3307.63	1579.34	3009.32	2572.51	2917.11	2812.89	839.823	2217.51	943.266	2217.98	2.64041	1.40076	3.17633e-09	4.76658e-07
ENSG00000198914.3_4	POU3F3	chr2	105471969	105475032	+	protein_coding_gene	1.53155	4.77007	4.45145	2.00391	1.0293	1.05946	2.0586	395.854	1.07083	3.32726	1.0293	2.18602	0.9919	1.9515	2.11893	1.0293	1.13443	1.0293	1.05574	2.21818	1.12246	1.09051	1.09051	3.36739	51.5948	1.61335	2.03126	1.10648	0.0312407	-5.00043	3.18144e-09	4.76658e-07
ENSG00000169515.5_3	CCDC8	chr19	46913629	46916841	-	protein_coding_gene	241.219	236.595	356.116	327.64	461.127	279.698	317.025	260.631	69.6037	67.6543	59.6995	51.3715	160.688	75.1326	40.2596	26.7619	70.3349	117.34	216.427	88.727	130.206	111.232	21.8102	37.0412	310.007	84.018	298.362	69.9693	0.271105	-1.88307	3.28029e-09	4.90047e-07
ENSG00000215033.3	AL603965.1	chr10	47746962	47770871	+	protein_coding_gene	552.89	135.47	255.513	26.0509	57.6409	186.466	79.2563	128.68	17.1332	29.9454	12.3516	46.9994	39.676	52.6904	15.8919	18.5274	54.4528	46.3186	14.7803	54.3453	35.9188	11.9956	5.45254	10.1022	177.746	29.1613	132.075	24.2364	0.163939	-2.60876	3.28849e-09	4.90047e-07
ENSG00000176951.6_3	OR51N1P	chr11	4807984	4808935	+	pseudogene	1.53155	16.2182	0.890291	15.0294	6.17581	8.4757	3.08791	1.09051	23.5582	29.9454	256.296	40.4414	189.453	34.1512	94.2922	190.421	80.5447	45.2893	147.803	17.7454	13.4695	6.54305	6.54305	114.491	6.56242	80.6868	4.63186	42.8653	12.3318	3.62431	3.31274e-09	4.92337e-07
ENSG00000189127.7_3	ANKRD34B	chr5	79852574	79866307	-	protein_coding_gene	12.2524	11.4482	3.56116	22.0431	7.20512	7.41624	4.11721	13.0861	51.3997	63.218	1221.78	1006.66	1312.28	339.56	2.11893	7.20512	69.2004	23.674	1.05574	77.6361	968.685	1.09051	1455.83	142.553	10.1412	421.497	9.4322	73.4183	41.564	5.37726	3.38815e-09	5.02198e-07
ENSG00000145020.15_3	AMT	chr3	49454208	49460186	-	protein_coding_gene	598.07	731.729	868.924	748.462	446.717	841.214	911.962	379.497	420.835	139.745	182.186	228.439	444.371	132.702	74.1624	104.989	105.502	270.706	276.604	167.472	77.4499	91.6026	113.413	63.9803	690.822	180.885	740.095	136.223	0.261903	-1.9329	3.46925e-09	5.12848e-07
ENSG00000163121.9_3	NEURL3	chr2	97163380	97173846	-	protein_coding_gene	97.2534	157.412	243.049	157.307	109.106	75.2219	106.018	181.024	68.5329	19.9636	19.5567	39.3484	35.7084	65.3751	9.53517	45.2893	12.4788	71.0219	23.2263	44.3635	34.7963	17.4481	14.1766	6.73477	140.799	32.9722	133.207	29.0113	0.234462	-2.09257	3.55012e-09	5.23407e-07
ENSG00000126249.7_3	PDCD2L	chr19	34895289	34917073	+	protein_coding_gene	136.308	231.825	288.454	208.407	130.721	220.368	282.029	189.748	435.826	368.217	490.977	368.344	365.019	474.213	530.791	428.19	277.936	285.117	350.505	357.126	321.024	443.837	462.375	537.659	210.983	406.072	214.388	398.267	1.92534	0.945111	3.64972e-09	5.36664e-07
ENSG00000173918.14_3	C1QTNF1	chr17	77018896	77045870	+	protein_coding_gene	1969.57	181.263	327.627	354.693	1214.58	211.893	336.582	431.841	125.287	98.7088	148.22	76.5107	239.048	158.071	95.3517	101.901	87.3513	164.688	219.594	100.927	172.859	243.183	139.585	48.2659	628.506	138.722	345.637	132.436	0.220696	-2.17987	3.81887e-09	5.60051e-07
ENSG00000102854.15_3	MSLN	chr16	810762	818865	+	protein_coding_gene	284.868	107.804	8.90291	2.00391	39.1135	46.6164	24.7033	5.45254	4.28331	1.10909	2.0586	5.46505	3.9676	6.83023	7.41624	3.08791	3.4033	11.3223	4.22296	2.21818	7.85723	6.54305	20.7196	3.36739	64.9331	5.86701	31.9084	4.25313	0.0901906	-3.47088	3.84106e-09	5.61819e-07
ENSG00000128482.15_3	RNF112	chr17	19314438	19320589	+	protein_coding_gene	251.174	126.884	90.8097	189.37	534.208	63.5678	94.6958	34.8962	24.629	34.3817	34.9963	44.8134	56.5383	25.3694	1.05946	16.4688	13.6132	54.553	47.5083	15.5272	23.5717	43.6203	13.0861	21.3268	173.201	29.4414	110.79	24.9992	0.170061	-2.55588	3.86158e-09	5.63333e-07
ENSG00000121064.12_3	SCPEP1	chr17	55055466	55084129	+	protein_coding_gene	3538.65	3552.75	3785.52	3870.56	2269.61	3006.76	3116.73	2905.11	1865.38	1172.31	1179.58	1359.7	1750.7	2662.82	1553.17	1990.67	1346.57	1525.43	2296.23	1605.96	1176.34	2309.7	1712.1	1124.71	3255.71	1664.46	3327.69	1579.57	0.511255	-0.967884	3.97001e-09	5.77142e-07
ENSG00000166091.19_3	CMTM5	chr14	23846017	23848981	+	protein_coding_gene	30.631	12.4022	14.2447	22.0431	27.7912	5.29732	23.674	7.63355	7.49578	5.54544	2.0586	4.37204	5.9514	2.92724	1.05946	4.11721	4.53773	8.23442	5.2787	2.21818	6.73477	4.36203	5.45254	4.48985	17.9646	4.67721	18.1439	4.51379	0.258531	-1.95159	3.98244e-09	5.77142e-07
ENSG00000171346.15_3	KRT15	chr17	39669995	39678781	-	protein_coding_gene	6172.91	4921.76	4402.49	2875.62	3800.18	3881.87	4086.33	3328.23	1045.13	603.344	487.889	745.433	1013.72	312.239	36.0217	279.97	665.912	1399.85	1165.54	542.344	151.532	233.369	28.3532	37.0412	4183.67	546.73	3984.1	515.117	0.130685	-2.93583	3.98747e-09	5.77142e-07
ENSG00000123485.11_3	HJURP	chr2	234742062	234763212	-	protein_coding_gene	12.2524	29.5744	16.9155	32.0626	36.0256	16.9514	67.9339	16.3576	70.6745	59.8907	77.1977	87.4408	97.2062	189.295	318.898	174.981	103.233	126.604	173.141	52.1271	1413.18	356.596	268.265	75.205	28.5092	227.746	23.2629	114.919	7.99615	2.9993	4.05202e-09	5.83643e-07
ENSG00000099957.16_3	P2RX6	chr22	21364097	21383119	+	protein_coding_gene	30.631	34.3445	38.2825	33.0646	47.3479	30.7244	28.8205	27.2627	8.56661	7.76361	9.26372	10.9301	12.8947	9.75748	8.4757	11.3223	11.3443	18.5274	26.3935	9.98179	5.61231	28.3532	6.54305	6.73477	33.8098	12.029	31.8945	9.86963	0.356344	-1.48866	4.05344e-09	5.83643e-07
ENSG00000183248.11_3	PRR36	chr19	7933605	7939264	-	protein_coding_gene	13.0182	18.1263	19.5864	27.0528	6.17581	26.4866	20.586	11.9956	23.5582	36.5999	88.52	29.5113	54.5545	63.4236	87.9354	47.3479	51.0495	45.2893	97.128	48.7999	77.4499	69.7925	56.7064	24.6942	17.8785	56.3975	18.8563	52.802	3.16017	1.66	4.21135e-09	6.04809e-07
ENSG00000135519.6_3	KCNH3	chr12	49932940	49952091	+	protein_coding_gene	17.6128	15.2642	27.599	27.0528	22.6446	25.4271	19.5567	8.72406	5.35413	7.76361	4.11721	7.65107	8.9271	12.6847	6.35678	3.08791	5.67217	10.293	9.50165	4.43635	11.2246	5.45254	5.45254	2.24492	20.4852	6.88877	21.1007	6.01447	0.337374	-1.56758	4.31162e-09	6.17609e-07
ENSG00000198624.12_3	CCDC69	chr5	150560613	150603706	-	protein_coding_gene	1538.44	1696.24	1237.5	1027.01	1424.55	1136.8	1645.85	1878.94	688.541	717.58	490.977	370.531	769.714	950.378	300.888	380.842	351.674	952.105	650.335	556.762	679.09	517.991	423.117	203.166	1448.17	562.731	1481.5	537.377	0.388631	-1.36353	4.55488e-09	6.50773e-07
ENSG00000198217.4_3	OR51H2P	chr11	4892947	4899347	+	pseudogene	9.95508	118.298	6.23204	103.202	21.6153	54.0326	10.293	3.27152	213.094	235.127	1214.58	231.718	981.981	150.265	576.348	1162.08	482.134	200.714	924.827	93.1634	81.9397	125.408	29.4437	921.541	40.8624	476.523	15.9542	233.422	11.6653	3.54416	4.67346e-09	6.64291e-07
ENSG00000165480.15_3	SKA3	chr13	21727734	21750741	-	protein_coding_gene	39.0545	28.6204	22.2573	29.0568	40.1428	26.4866	61.7581	28.3532	88.8786	60.9998	86.4614	60.1156	68.4411	141.483	204.476	193.509	82.8136	62.7874	50.6755	68.7634	153.777	158.124	152.671	85.3071	34.4662	107.455	28.8386	85.8843	3.11877	1.64098	4.66932e-09	6.64291e-07
ENSG00000136160.14_3	EDNRB	chr13	78469616	78493903	-	protein_coding_gene	2789.72	1908.03	5165.47	968.892	2209.91	1489.61	1483.22	2563.78	497.934	923.87	731.834	416.437	695.322	519.098	219.309	403.486	305.163	1446.17	413.85	1059.18	283.983	463.466	1111.23	396.229	2322.33	617.91	2058.97	480.7	0.266069	-1.91013	4.69287e-09	6.65344e-07
ENSG00000183347.14_3	GBP6	chr1	89829617	89852020	+	protein_coding_gene	31.3968	21.9423	24.9281	23.045	51.4651	19.0703	21.6153	16.3576	11.7791	4.43635	8.23442	8.74408	20.8299	7.80598	3.17839	7.20512	4.53773	11.3223	5.2787	7.76361	12.3471	8.72406	7.63355	5.61231	26.2276	8.46454	22.4937	7.7848	0.323553	-1.62792	4.72461e-09	6.68135e-07
ENSG00000183773.15_3	AIFM3	chr22	21319396	21335649	+	protein_coding_gene	50.5412	76.3211	46.2951	39.0763	30.8791	51.9137	46.3186	77.426	28.9123	15.5272	20.586	26.2322	15.8704	29.2724	13.773	7.20512	11.3443	20.586	15.8361	17.7454	13.4695	15.2671	20.7196	41.5311	52.3464	19.6174	48.4299	16.8079	0.37491	-1.41538	4.75161e-09	6.70243e-07
ENSG00000162616.8_3	DNAJB4	chr1	78444859	78483648	+	protein_coding_gene	4015.72	2466.13	3152.52	3317.48	3145.55	2207.92	2070.96	2549.61	1955.33	1332.01	1313.39	1474.47	1938.17	1102.59	644.154	1688.06	1254.68	1697.32	1176.09	1599.3	1562.47	877.859	1637.94	1149.4	2865.74	1400.2	2847.58	1403.24	0.488575	-1.03335	4.7999e-09	6.75336e-07
ENSG00000086548.8_3	CEACAM6	chr19	42254885	42276113	+	protein_coding_gene	2353.23	75.3671	78.3456	90.1761	279.97	82.6381	215.124	127.589	21.4165	18.8545	10.293	95.0919	64.4735	64.3993	54.0326	43.2307	15.8821	49.4065	44.341	55.4544	74.0825	54.5254	6.54305	12.3471	412.805	42.7734	108.883	46.8738	0.103591	-3.27102	4.85991e-09	6.82048e-07
ENSG00000226686.7_2	LINC01535	chr19	37742814	37756437	+	lncRNA	58.1989	118.298	73.0038	87.1703	186.304	108.065	97.7837	50.1634	48.1872	251.763	317.025	168.324	421.557	215.64	381.407	241.886	248.441	284.087	409.627	291.69	416.433	356.596	383.859	328.881	97.3733	297.838	92.477	304.358	3.06076	1.61389	5.05695e-09	7.07909e-07
ENSG00000228566.1_3	AC022387.1	chr10	65424424	65750328	+	lncRNA	653.972	886.279	234.146	717.401	440.541	1493.84	809.032	335.876	1543.06	2525.39	3980.31	3274.66	4315.76	2341.79	3795	3362.73	7623.39	7092.92	5069.66	3411.55	2103.49	172.3	4683.73	1151.65	696.386	3527.96	685.687	3387.14	5.06631	2.34094	5.09154e-09	7.10955e-07
ENSG00000187801.14_3	ZFP69B	chr1	40915774	40929390	+	protein_coding_gene	87.2984	115.436	137.995	154.301	121.458	119.719	181.157	89.4216	206.669	240.672	281	195.649	244.007	301.506	367.634	401.428	226.887	195.567	281.882	298.345	188.574	261.722	635.766	321.024	125.848	290.521	120.588	271.361	2.30958	1.20763	5.1779e-09	7.21198e-07
ENSG00000100575.13_3	TIMM9	chr14	58875212	58894332	-	protein_coding_gene	611.089	724.097	803.042	762.489	677.281	734.208	732.863	723.007	1144.71	1001.51	1030.33	1113.78	857.993	1091.86	998.014	1202.23	1010.78	942.841	1001.9	951.597	799.193	1069.79	803.704	1055.11	721.009	1004.71	728.48	1006.34	1.39387	0.479098	5.20816e-09	7.22359e-07
ENSG00000127129.9_3	EDN2	chr1	41944446	41950344	-	protein_coding_gene	731.315	52.4708	71.2233	166.325	55.5823	189.644	65.8753	256.269	77.0995	12.2	23.674	52.4645	48.6031	44.8844	45.5569	48.3772	55.5872	22.6446	34.8394	32.1635	22.4492	40.3488	22.9007	12.3471	198.588	37.2588	118.774	37.5941	0.187523	-2.41486	5.2123e-09	7.22359e-07
ENSG00000133019.11_3	CHRM3	chr1	239549865	240078752	+	protein_coding_gene	937.309	1062.77	453.158	1423.78	2851.17	5882.14	950.046	1803.7	8134	18399.8	100757	15312	89941.5	25187	30794.4	8710.98	7913.81	5110.49	2393.36	3963.88	24676.2	6035.96	8087.21	902.459	1920.51	22270	1243.28	8422.49	11.5962	3.53558	5.4608e-09	7.54911e-07
ENSG00000156970.12_3	BUB1B	chr15	40453224	40513337	+	protein_coding_gene	80.4064	73.4591	58.7592	102.2	162.63	58.2705	157.483	49.0728	162.766	147.509	309.82	175.975	262.853	444.941	622.964	390.106	264.323	273.794	241.764	147.509	400.719	521.263	591.055	145.92	92.7851	318.955	76.9327	269.059	3.43894	1.78197	5.48987e-09	7.57043e-07
ENSG00000169750.8_3	RAC3	chr17	79989500	79992080	+	protein_coding_gene	142.434	248.998	206.547	247.483	107.047	230.963	228.505	116.684	313.752	391.508	538.325	526.831	272.772	594.23	1125.15	730.805	367.556	344.816	390.623	301.672	1040.52	972.733	1266.08	699.294	191.083	617.292	217.526	532.578	3.23046	1.69174	5.75578e-09	7.90128e-07
ENSG00000150165.13	ANXA8L1	chr10	47157983	47174093	-	protein_coding_gene	215.183	22.8963	61.4301	6.01174	15.4395	77.3408	19.5567	28.3532	6.42496	6.65453	5.14651	7.65107	8.9271	10.7332	1.05946	3.08791	12.4788	17.4981	4.22296	16.6363	5.61231	5.45254	2.18102	1.12246	55.7764	7.18058	25.6248	6.01863	0.128484	-2.96034	5.7583e-09	7.90128e-07
ENSG00000182870.8	GALNT9	chr12	132680924	132905935	-	protein_coding_gene	66.6224	34.3445	52.5272	42.0822	52.4944	56.1515	54.553	32.7152	29.9831	38.8181	19.5567	12.0231	18.8461	18.5392	5.29732	17.4981	9.07546	9.26372	20.059	8.8727	11.2246	20.7196	14.1766	5.61231	48.9363	16.2229	52.5108	15.8374	0.331394	-1.59338	5.84207e-09	7.99642e-07
ENSG00000228350.1_3	CELSR3-AS1	chr3	48701209	48706607	+	as_lncRNA	6.89198	21.9423	6.23204	18.0352	6.17581	6.35678	11.3223	9.81457	10.7083	31.0545	33.967	22.9532	32.7327	36.1027	67.8056	34.9963	30.6297	32.9377	25.3377	28.8363	61.7354	75.245	41.4393	43.776	10.8464	38.1411	8.35327	33.4523	3.52267	1.81667	5.93989e-09	8.1103e-07
ENSG00000115380.19_3	EFEMP1	chr2	56093102	56151274	-	protein_coding_gene	6996.12	3298.98	3113.35	3611.05	6737.81	2626.41	3032.32	2881.12	1346.03	953.815	752.42	1000.1	2512.48	1087.96	355.98	952.105	1322.75	2661.78	1030.4	1042.54	2031.66	1011.99	651.033	607.252	4037.15	1207.52	3206.16	1021.2	0.299102	-1.74129	6.00158e-09	8.17438e-07
ENSG00000205420.10_3	KRT6A	chr12	52880958	52887041	-	protein_coding_gene	785.685	2.86204	2.67087	17.0333	202.773	2.11893	44.26	57.7969	8.56661	3.32726	12.3516	2.18602	14.8785	2.92724	4.23785	4.11721	3.4033	5.14651	23.2263	19.9636	11.2246	3.27152	4.36203	3.36739	139.4	7.90985	30.6466	4.29994	0.0567212	-4.13997	6.13575e-09	8.33665e-07
ENSG00000154678.16_3	PDE1C	chr7	31790793	32338941	-	protein_coding_gene	1814.89	948.29	1832.22	1984.88	4461	1324.33	701.984	1018.53	389.781	380.417	269.677	326.81	829.228	194.174	43.438	506.417	380.035	996.365	275.548	229.581	187.451	99.2362	312.976	159.39	1760.76	348.783	1569.61	294.262	0.198104	-2.33567	6.15805e-09	8.34649e-07
ENSG00000165801.9_3	ARHGEF40	chr14	21538429	21558399	+	protein_coding_gene	1144.07	506.581	1116.42	584.141	1015.92	669.581	785.358	711.011	301.973	314.981	336.582	281.997	543.561	419.571	258.509	258.355	319.91	515.68	520.479	331.617	347.963	389.311	346.781	124.593	816.636	350.742	748.184	334.1	0.429499	-1.21927	6.3478e-09	8.58269e-07
ENSG00000023608.4_3	SNAPC1	chr14	62229075	62263146	+	protein_coding_gene	1912.91	1806.9	2856.94	2266.43	2111.1	2131.64	1729.23	1615.04	1398.5	1133.49	1035.48	1379.38	1653.5	1477.28	1280.89	1284.57	1140.11	1307.21	1351.35	1462.89	1024.81	900.759	1111.23	1409.81	2053.77	1271.95	2012	1295.89	0.619322	-0.691237	6.39124e-09	8.62041e-07
ENSG00000197984.4_3	OR51A8P	chr11	4851405	4854302	+	pseudogene	5.36043	57.2408	2.67087	43.0842	12.3516	33.9028	12.3516	3.27152	83.5244	104.254	660.812	120.231	562.407	96.599	283.936	640.226	284.743	99.8423	505.699	45.4726	42.6536	38.1678	6.54305	520.822	21.2792	255.996	12.3516	112.243	12.0404	3.58981	6.55765e-09	8.82338e-07
ENSG00000159648.11_3	TEPP	chr16	58010339	58022020	+	protein_coding_gene	19.1444	11.4482	33.8311	23.045	23.674	29.665	24.7033	25.0817	13.9207	8.8727	3.08791	7.65107	5.9514	6.83023	3.17839	3.08791	2.26887	19.5567	2.11148	7.76361	2.24492	4.36203	3.27152	2.24492	23.8241	6.02528	24.1886	3.81678	0.254032	-1.97692	6.75339e-09	9.06475e-07
ENSG00000149150.8_3	SLC43A1	chr11	57252007	57283259	-	protein_coding_gene	392.077	1022.7	422.888	1003.96	466.274	612.37	705.072	668.481	2232.67	2346.83	4745.08	2199.14	2194.08	3761.51	8259.57	5103.28	1319.35	909.903	3035.25	475.799	900.215	7078.49	1762.26	3250.65	661.728	3098.38	640.425	2289.75	4.68253	2.22729	7.01346e-09	9.39109e-07
ENSG00000123473.15_3	STIL	chr1	47715811	47779819	-	protein_coding_gene	273.382	457.927	351.665	550.074	378.783	392.001	371.578	226.826	834.174	446.962	899.61	758.549	1427.34	1085.03	1328.57	1216.64	669.316	777.123	881.542	459.162	808.173	1287.89	1945.47	630.824	375.28	966.023	375.181	857.858	2.57445	1.36426	7.2112e-09	9.63259e-07
ENSG00000229847.8_3	EMX2OS	chr10	119232726	119304579	-	as_lncRNA	75.8117	21.9423	76.565	51.0998	82.3442	20.1298	20.586	1197.38	25.6998	35.4908	8.23442	8.74408	13.8866	25.3694	7.41624	10.293	3.4033	11.3223	49.6197	8.8727	14.592	3.27152	7.63355	29.184	193.232	16.4396	63.4558	10.8077	0.0851264	-3.55425	7.24719e-09	9.6574e-07
ENSG00000257434.1_3	AC073525.1	chr12	75414749	75438573	+	as_lncRNA	9.1893	36.2525	16.0252	31.0607	32.9377	16.9514	36.0256	10.9051	51.3997	34.3817	91.6079	1252.59	325.343	810.846	1235.33	205.86	176.972	53.5237	58.0656	135.309	42.6536	344.6	18.5386	25.8166	23.6684	303.928	24.006	113.458	12.8492	3.68361	7.33088e-09	9.74551e-07
ENSG00000104321.10_3	TRPA1	chr8	72932152	72987852	-	protein_coding_gene	962.579	17.1723	21.367	12.0235	10.293	7.41624	13.3809	14.1766	20.3457	18.8545	4.11721	5.46505	3.9676	7.80598	6.35678	11.3223	5.67217	10.293	4.22296	12.2	4.48985	6.54305	7.63355	8.9797	132.301	8.64184	13.7788	7.0883	0.0652135	-3.93869	7.43304e-09	9.85767e-07
ENSG00000167346.7_4	MMP26	chr11	4726157	5013659	+	protein_coding_gene	317.797	4059.33	91.7	3347.54	648.46	1527.75	473.479	105.779	6465.65	7550.67	41334.7	8420.55	33520.3	7570.83	20526	38666.8	15896.8	6535.04	31316.4	3003.41	2677.07	2622.67	735.002	35521.4	1321.48	16397.7	560.97	7995.69	12.4087	3.63328	7.45311e-09	9.8607e-07
ENSG00000117724.12_3	CENPF	chr1	214776538	214837931	+	protein_coding_gene	129.416	125.93	140.666	432.845	446.717	125.017	350.992	146.128	437.968	336.054	723.599	582.575	797.487	1046	2308.57	2724.56	981.285	899.61	564.82	419.235	1332.36	2467.82	2556.15	543.272	237.214	1170.09	143.397	848.549	4.93362	2.30265	7.5468e-09	9.96087e-07
ENSG00000205363.5_3	C15orf59	chr15	74027772	74045088	-	protein_coding_gene	304.013	246.136	387.277	189.37	308.791	221.428	182.186	155.943	77.0995	56.5635	54.553	66.6736	82.3277	120.993	13.773	14.4102	43.1085	141.014	120.354	53.2362	48.2659	52.3444	69.7925	15.7145	249.393	64.389	233.782	55.5582	0.258286	-1.95296	7.56954e-09	9.96715e-07
ENSG00000167701.13_3	GPT	chr8	145728356	145732557	+	protein_coding_gene	26.8021	41.0226	37.3922	21.0411	34.9963	39.2001	26.7619	17.4481	6.42496	7.76361	20.586	8.74408	6.9433	15.612	3.17839	6.17581	5.67217	5.14651	17.9476	8.8727	2.24492	10.9051	17.4481	6.73477	30.5831	9.4	30.8992	7.35346	0.308146	-1.69831	7.59424e-09	9.97599e-07
ENSG00000141469.16_3	SLC14A1	chr18	43304092	43332485	+	protein_coding_gene	15992.4	13048	14566	11400.3	13755.6	7691.7	3213.48	2539.79	2045.28	686.525	519.798	1309.43	4842.46	1428.49	479.937	594.937	640.955	4552.6	1108.53	1737.94	617.354	294.437	123.227	204.288	10275.9	1324.14	12224.2	663.74	0.128861	-2.95611	7.66088e-09	1.00397e-06
ENSG00000203818.7_3	HIST2H3PS2	chr1	149400132	149400542	-	protein_coding_gene	11.4866	34.3445	98.8223	23.045	23.674	20.1298	49.4065	32.7152	21.4165	11.0909	5.14651	3.27903	9.919	11.709	7.41624	9.26372	3.4033	12.3516	6.33443	7.76361	13.4695	6.54305	3.27152	3.36739	36.703	8.48408	28.1946	7.58993	0.231474	-2.11108	7.69794e-09	1.00645e-06
ENSG00000179636.14_3	TPPP2	chr14	21492268	21504435	+	protein_coding_gene	23.739	11.4482	27.599	23.045	21.6153	14.8325	29.8498	41.4393	12.8499	12.2	7.20512	3.27903	7.9352	10.7332	2.11893	4.11721	5.67217	10.293	2.11148	11.0909	3.36739	11.9956	5.45254	3.36739	24.196	7.11181	23.392	6.43864	0.294881	-1.7618	7.7892e-09	1.01599e-06
ENSG00000244649.4_2	LINC02086	chr17	46724285	46784708	+	lncRNA	110.272	48.6547	32.0505	61.1194	25.7326	41.3191	21.6153	77.426	22.4874	23.2908	10.293	5.46505	14.8785	18.5392	5.29732	17.4981	9.07546	22.6446	5.2787	23.2908	14.592	14.1766	4.36203	7.85723	52.2736	13.6892	44.9869	14.3843	0.261607	-1.93452	7.81341e-09	1.01675e-06
ENSG00000175130.6_3	MARCKSL1	chr1	32799433	32801980	-	protein_coding_gene	1314.84	2132.22	2294.28	1379.69	1172.38	2036.29	2711.18	1655.39	3266.02	3801.95	5285.47	3295.43	3347.66	6941.47	9507.62	2522.82	2567.22	3334.94	6080	5283.69	7278.04	6698.99	6305.32	2948.71	1837.03	4904.08	1845.84	4542.82	2.66961	1.41663	7.83809e-09	1.01757e-06
ENSG00000284681.1_1	AC007240.1	chr2	10262866	10339414	+	protein_coding_gene	66.6224	41.9766	32.0505	71.139	97.7837	36.0217	192.48	35.9868	168.12	186.327	155.425	349.763	229.129	325.9	1174.94	340.699	208.736	209.978	269.213	99.8179	901.337	714.283	1217.01	181.839	71.7575	420.782	54.2995	249.171	5.86545	2.55224	7.95392e-09	1.0302e-06
ENSG00000263432.1	RN7SL689P	chr5	122358184	122358478	-	misc_RNA	19.9102	19.0803	29.3796	23.045	54.553	18.0109	17.4981	21.8102	9.63744	12.2	6.17581	5.46505	13.8866	7.80598	7.41624	11.3223	9.07546	10.293	13.7246	6.65453	12.3471	8.72406	5.45254	6.73477	25.4109	9.18222	20.8602	8.89976	0.362411	-1.4643	8.04682e-09	1.0398e-06
ENSG00000248429.5_4	AC098679.1	chr4	159091904	159124029	+	as_lncRNA	410.455	419.766	746.064	1435.8	2144.04	1152.7	1025.19	479.823	3127.88	3035.57	4568.04	5521.89	7963.96	2622.81	2053.24	7582.87	6718.11	3593.29	1847.54	4999.77	1400.83	2928.01	1704.46	2212.37	976.729	3867.54	885.624	3081.73	3.96003	1.98551	8.10768e-09	1.04523e-06
ENSG00000123570.3_3	RAB9B	chrX	103077252	103087158	-	protein_coding_gene	703.747	773.705	845.776	991.937	1581.01	576.348	763.742	431.841	458.314	302.781	372.607	236.09	431.476	284.918	223.547	135.868	162.224	543.472	451.856	311.654	242.452	231.188	287.894	145.92	833.513	301.391	768.724	286.406	0.361649	-1.46734	8.13e-09	1.04568e-06
ENSG00000071539.13_4	TRIP13	chr5	892758	919472	+	protein_coding_gene	62.0278	33.3905	40.0631	36.0705	65.8753	28.6055	63.8167	44.7108	114.578	80.9634	204.831	99.4639	128.947	92.696	229.903	138.956	58.9905	98.813	101.351	100.927	211.023	188.658	329.333	90.9194	46.82	141.897	42.387	107.965	3.02855	1.59863	8.17718e-09	1.04805e-06
ENSG00000237512.6_3	UNC5B-AS1	chr10	72976981	72977985	-	as_lncRNA	11.4866	14.3102	12.4641	14.0274	6.17581	15.8919	9.26372	4.36203	5.35413	2.21818	2.0586	1.09301	3.9676	3.90299	1.05946	1.0293	4.53773	2.0586	2.11148	5.54544	3.36739	4.36203	2.18102	1.12246	10.9977	2.87309	11.9753	2.1996	0.259707	-1.94504	8.18625e-09	1.04805e-06
ENSG00000225792.1_3	AC004540.2	chr7	26411764	26416321	-	as_lncRNA	2.29733	10.4942	11.5738	15.0294	5.14651	7.41624	11.3223	38.1678	137.066	336.054	345.846	255.764	327.327	283.943	11.6541	72.0512	17.0165	20.586	9.50165	36.5999	245.819	58.8874	20.7196	75.205	12.6809	140.877	10.9082	73.6281	11.1506	3.47905	8.25813e-09	1.05239e-06
ENSG00000173612.9_3	GPRC6A	chr6	117113248	117150200	-	protein_coding_gene	46.7123	27.6664	170.936	12.0235	13.3809	59.3299	13.3809	22.9007	7.49578	16.6363	6.17581	21.8602	4.9595	8.78173	3.17839	4.11721	4.53773	7.20512	2.11148	6.65453	6.73477	2.18102	8.72406	6.73477	45.7913	7.38053	25.2835	6.69465	0.160652	-2.63799	8.25365e-09	1.05239e-06
ENSG00000198944.5_3	SOWAHA	chr5	132149279	132152489	+	protein_coding_gene	205.994	325.319	1096.84	124.243	61.7581	649.451	312.908	809.157	190.607	25.509	43.2307	92.9059	95.2224	43.9086	51.9137	14.4102	27.2264	79.2563	80.2362	123.109	61.7354	175.572	92.6932	50.5108	448.208	78.0029	319.113	70.4958	0.174027	-2.52262	8.36324e-09	1.06334e-06
ENSG00000197641.11_3	SERPINB13	chr18	61254223	61271873	+	protein_coding_gene	68.9198	10.4942	81.9068	15.0294	34.9963	8.4757	13.3809	18.5386	9.63744	6.65453	4.11721	3.27903	5.9514	1.9515	2.11893	2.0586	3.4033	18.5274	5.2787	2.21818	6.73477	5.45254	2.18102	2.24492	31.4677	5.11309	16.784	3.76025	0.162038	-2.6256	8.73252e-09	1.10775e-06
ENSG00000188277.9_3	C15orf62	chr15	41062278	41064647	+	protein_coding_gene	124.821	11.4482	12.4641	5.00979	12.3516	18.0109	20.586	21.8102	4.28331	4.43635	2.0586	4.37204	1.9838	9.75748	5.29732	6.17581	2.26887	5.14651	4.22296	2.21818	4.48985	8.72406	2.18102	2.24492	28.3128	4.36632	15.2375	4.32767	0.153592	-2.70282	8.76937e-09	1.10989e-06
ENSG00000266079.4_3	SNORA59B	chr17	19460524	19461224	+	snoRNA	17.6128	7.63211	15.1349	17.0333	7.20512	15.8919	20.586	14.1766	9.63744	5.54544	4.11721	9.83709	3.9676	2.92724	1.05946	1.0293	1.13443	4.11721	2.11148	3.32726	4.48985	1.09051	1.09051	3.36739	14.4091	3.67809	15.5134	3.34732	0.25454	-1.97403	8.86978e-09	1.11526e-06
ENSG00000181234.9_3	TMEM132C	chr12	128751948	129192460	+	protein_coding_gene	1044.52	248.998	418.437	653.276	2080.22	347.504	277.912	410.031	228.086	221.818	198.655	106.022	222.186	95.6233	13.773	122.487	116.847	220.271	220.649	118.672	58.368	55.6159	109.051	61.7354	685.112	135.616	414.234	117.759	0.197969	-2.33665	8.87222e-09	1.11526e-06
ENSG00000170370.11_3	EMX2	chr10	119301955	119309057	+	protein_coding_gene	6.1262	15.2642	20.4767	12.0235	18.5274	5.29732	5.14651	458.013	5.35413	4.43635	3.08791	2.18602	1.9838	10.7332	1.05946	1.0293	2.26887	1.0293	10.5574	1.10909	10.1022	2.18102	4.36203	6.73477	67.6094	4.26343	13.6439	2.67839	0.0631477	-3.98513	8.89873e-09	1.11607e-06
ENSG00000262050.1_3	AC005696.1	chr17	2615603	2616127	+	as_lncRNA	19.1444	35.2985	48.0757	26.0509	27.7912	40.2596	21.6153	21.8102	6.42496	6.65453	7.20512	7.65107	14.8785	24.3937	6.35678	5.14651	4.53773	14.4102	9.50165	7.76361	7.85723	10.9051	17.4481	7.85723	30.0057	9.937	26.921	7.81042	0.333105	-1.58595	9.1558e-09	1.14313e-06
ENSG00000253361.1_4	AC069120.1	chr8	38401170	38410198	-	lncRNA	16.0813	34.3445	21.367	92.18	155.425	16.9514	18.5274	21.8102	10.7083	13.3091	11.3223	9.83709	9.919	6.83023	3.17839	2.0586	2.26887	17.4981	10.5574	9.98179	10.1022	2.18102	5.45254	3.36739	47.0858	8.03577	21.5886	9.87805	0.171035	-2.54764	9.14989e-09	1.14313e-06
ENSG00000073969.18_3	NSF	chr17	44668035	44834830	+	protein_coding_gene	2278.18	2869.67	3042.12	2602.08	3103.35	2614.75	2292.26	2254.08	3475.9	3215.25	5747.62	3848.49	3995.37	5240.74	5089.66	3625.2	3726.61	5147.54	4992.59	4461.86	2943.1	4845.13	5786.23	4502.2	2632.06	4415.22	2608.42	4482.03	1.6775	0.746316	9.2638e-09	1.15402e-06
ENSG00000168427.8_3	KLHL30	chr2	239047363	239061588	+	protein_coding_gene	40.5861	11.4482	67.6621	15.0294	36.0256	23.3082	25.7326	25.0817	4.28331	3.32726	4.11721	5.46505	1.9838	14.6362	8.4757	1.0293	6.8066	11.3223	6.33443	1.10909	8.9797	14.1766	9.81457	1.12246	30.6092	6.43648	25.4071	5.89974	0.210141	-2.25057	9.52794e-09	1.18426e-06
ENSG00000235162.8_3	C12orf75	chr12	105629068	105789875	+	protein_coding_gene	2053.81	2547.22	3516.65	3409.66	6227.28	1871.01	2310.78	2577.96	1333.18	1090.23	1185.76	729.038	860.969	1569	369.753	466.274	559.276	1138.41	1478.03	1345.32	1719.61	484.185	567.064	480.414	3064.3	961.033	2562.59	975.601	0.313632	-1.67286	9.62773e-09	1.19279e-06
ENSG00000206172.8_3	HBA1	chr16	226679	227521	+	protein_coding_gene	604.197	13.3562	3.56116	18.0352	15.4395	16.9514	31.9084	57.7969	9.63744	14.4181	9.26372	8.74408	2.9757	3.90299	1.05946	5.14651	12.4788	10.293	7.39017	9.98179	6.73477	3.27152	17.4481	2.24492	95.1557	7.81195	17.4933	8.06713	0.0818679	-3.61056	9.63955e-09	1.19279e-06
ENSG00000137441.7_3	FGFBP2	chr4	15961866	15970932	-	protein_coding_gene	295.589	83.9532	76.565	159.311	174.981	37.0812	147.19	70.883	24.629	68.7634	5.14651	37.1624	13.8866	13.6605	6.35678	21.6153	6.8066	33.967	53.8427	36.5999	28.0616	15.2671	10.9051	5.61231	130.694	23.8927	115.572	18.4412	0.182606	-2.45319	9.79476e-09	1.20929e-06
ENSG00000128713.13_3	HOXD11	chr2	176968944	176974482	+	protein_coding_gene	329.283	179.355	624.984	154.301	452.893	228.844	154.395	290.075	101.728	19.9636	3.08791	52.4645	81.3358	30.2482	7.41624	14.4102	20.4198	159.542	23.2263	46.5817	16.8369	11.9956	4.36203	8.9797	301.766	37.6624	259.46	20.1917	0.12487	-3.0015	9.85745e-09	1.21433e-06
ENSG00000249951.1_3	AC108067.1	chr4	95596396	95623721	+	lncRNA	43.6492	130.7	97.0417	78.1526	44.26	81.5787	111.165	91.6026	144.562	815.179	476.567	419.716	702.265	2847.23	279.698	195.567	248.441	235.71	231.207	218.49	197.553	136.313	1055.61	322.147	84.7687	532.891	86.5907	264.07	6.28827	2.65266	9.96976e-09	1.2235e-06
ENSG00000215020.3	AL591684.1	chr10	48255279	48279199	+	protein_coding_gene	483.204	95.4014	176.278	27.0528	39.1135	182.228	67.9339	91.6026	21.4165	26.6181	21.6153	31.6973	26.7813	27.3209	11.6541	16.4688	54.4528	46.3186	22.1705	72.0907	24.6942	8.72406	10.9051	20.2043	145.352	27.6958	93.502	23.4323	0.190232	-2.39417	9.99811e-09	1.2235e-06
ENSG00000265190.6_3	ANXA8	chr10	48255204	48279200	+	protein_coding_gene	483.204	95.4014	176.278	27.0528	39.1135	182.228	67.9339	91.6026	21.4165	26.6181	21.6153	31.6973	26.7813	27.3209	11.6541	16.4688	54.4528	46.3186	22.1705	72.0907	24.6942	8.72406	10.9051	20.2043	145.352	27.6958	93.502	23.4323	0.190232	-2.39417	9.99811e-09	1.2235e-06
ENSG00000089685.14_3	BIRC5	chr17	76210267	76221717	+	protein_coding_gene	19.1444	24.8044	13.3544	39.0763	29.8498	19.0703	116.311	26.1722	118.862	99.8179	141.014	103.836	88.2791	440.062	435.439	236.74	81.6792	68.9632	101.351	80.9634	489.393	450.38	393.673	72.96	35.9729	212.713	25.4883	111.349	5.92131	2.56592	1.01963e-08	1.24501e-06
ENSG00000236305.1_3	SLC12A9-AS1	chr7	100434936	100450238	-	as_lncRNA	18.3786	20.0343	30.2699	28.0548	20.586	39.2001	32.9377	17.4481	52.4705	53.2362	137.926	51.3715	62.4897	56.5934	138.79	118.37	73.7382	55.5823	61.2329	42.1453	52.7557	75.245	54.5254	44.8985	25.8637	70.7107	24.3204	56.0878	2.74066	1.45453	1.02451e-08	1.24821e-06
ENSG00000105668.7_3	UPK1A	chr19	36157418	36169385	+	protein_coding_gene	209.822	87.7693	164.704	39.0763	397.311	215.071	238.798	22.9007	61.0371	12.2	7.20512	14.2091	27.7732	23.4179	3.17839	6.17581	4.53773	61.7581	19.0033	36.5999	31.4289	11.9956	45.8013	3.36739	171.932	23.1056	187.263	16.6062	0.134428	-2.89509	1.03588e-08	1.2593e-06
ENSG00000205611.4_2	LINC01597	chr20	29513582	29523155	-	lncRNA	11.4866	13.3562	90.8097	43.0842	24.7033	34.9623	43.2307	35.9868	9.63744	8.8727	6.17581	4.37204	11.9028	1.9515	7.41624	3.08791	6.8066	11.3223	7.39017	26.6181	7.85723	10.9051	5.45254	8.9797	37.2025	8.67176	35.4745	7.63674	0.232643	-2.10381	1.05155e-08	1.27555e-06
ENSG00000137752.23_4	CASP1	chr11	104896170	104905977	-	protein_coding_gene	915.101	520.892	486.989	540.055	528.032	518.077	900.639	1020.72	301.973	279.49	126.604	301.671	354.108	331.754	173.752	359.226	268.861	401.428	146.748	422.562	290.718	196.291	206.106	121.226	678.813	267.657	534.043	285.104	0.394336	-1.3425	1.0614e-08	1.28469e-06
ENSG00000269699.5_3	ZIM2	chr19	57285920	57352097	-	protein_coding_gene	1020.01	995.037	1533.97	996.947	1456.46	1025.56	956.222	930.203	669.266	442.526	705.072	583.668	959.167	475.189	551.98	688.603	515.033	665.959	834.034	628.853	584.803	664.119	500.543	708.274	1114.3	636.068	1008.48	646.486	0.570844	-0.808832	1.06714e-08	1.28602e-06
ENSG00000249188.1_3	ENPP7P1	chr8	8011830	8074438	+	pseudogene	96.4877	72.5051	64.9912	62.1213	201.743	47.6758	38.0842	68.702	31.054	17.7454	9.26372	30.6043	52.5707	25.3694	29.665	20.586	27.2264	28.8205	28.505	42.1453	14.592	14.1766	20.7196	17.9594	81.5388	25.6877	66.8466	26.2979	0.315248	-1.66544	1.06556e-08	1.28602e-06
ENSG00000233901.5_2	LINC01503	chr9	132094579	132121817	+	lncRNA	313.202	152.642	178.948	162.317	154.395	167.395	166.747	560.521	69.6037	38.8181	28.8205	49.1855	86.2953	167.829	20.1298	48.3772	28.3608	78.227	35.8951	72.0907	81.9397	21.8102	26.1722	15.7145	232.021	54.3293	167.071	43.5976	0.234398	-2.09297	1.07553e-08	1.29332e-06
ENSG00000102837.6_3	OLFM4	chr13	53602894	53626192	+	protein_coding_gene	63060.8	7095.96	5295.45	3751.33	9040.36	3467.62	2346.81	8023.96	400.489	279.49	80.2856	3009.06	683.419	201.004	25.4271	990.189	741.919	2691.63	841.424	2550.9	114.491	618.318	53.4349	61.7354	12760.3	833.951	6195.7	509.403	0.0653549	-3.93556	1.11832e-08	1.34186e-06
ENSG00000103175.10_3	WFDC1	chr16	84328252	84363457	+	protein_coding_gene	2025.48	1272.65	1994.25	1202.35	2992.18	1312.67	1465.73	499.453	591.096	341.599	359.226	256.857	614.978	483.971	189.644	138.956	285.877	691.691	731.627	399.272	1016.95	538.711	449.289	225.615	1595.6	457.21	1389.2	424.28	0.286538	-1.8032	1.13449e-08	1.35832e-06
ENSG00000183092.16_3	BEGAIN	chr14	101003484	101053750	-	protein_coding_gene	101.082	59.1489	145.117	58.1135	133.809	63.5678	45.2893	63.2494	21.4165	43.2544	40.1428	15.3021	40.6679	14.6362	15.8919	12.3516	15.8821	44.26	44.341	17.7454	34.7963	23.9912	22.9007	10.1022	83.6722	26.1051	63.4086	22.1586	0.311904	-1.68082	1.15599e-08	1.38108e-06
ENSG00000197308.9_3	GATA3-AS1	chr10	8092413	8095447	-	lncRNA	10.7209	17.1723	24.0379	5.00979	12.3516	11.6541	14.4102	122.137	5.35413	7.76361	1.0293	7.65107	0.9919	6.83023	1.05946	2.0586	1.13443	6.17581	1.05574	4.43635	3.36739	2.18102	1.09051	1.12246	27.1867	3.33138	13.3809	2.11981	0.122974	-3.02357	1.17541e-08	1.40126e-06
ENSG00000175336.9_3	APOF	chr12	56754353	56756607	-	protein_coding_gene	14.5497	90.6313	34.7213	88.1722	9.26372	62.5083	36.0256	22.9007	289.123	298.345	189.392	112.58	157.712	845.973	1181.3	269.677	259.785	142.044	214.315	257.308	63.9803	1532.16	29.4437	143.675	44.8466	374.176	35.3735	235.812	8.34648	3.06117	1.21483e-08	1.444e-06
ENSG00000183317.16_3	EPHA10	chr1	38179552	38230805	-	protein_coding_gene	65.0909	140.24	186.071	62.1213	22.6446	120.779	117.34	54.5254	187.395	249.545	538.325	272.16	288.643	341.512	291.352	172.923	287.012	216.153	411.738	212.945	156.022	366.411	455.832	261.534	96.1015	294.344	91.2157	279.586	3.06135	1.61417	1.21647e-08	1.444e-06
ENSG00000171126.7_4	KCNG3	chr2	42669157	42721237	-	protein_coding_gene	124.821	111.62	106.835	152.297	220.271	66.7462	111.165	57.7969	2586.05	4762.42	1385.44	2747.83	1870.72	4224.01	6.35678	971.661	1311.4	1131.2	76.0132	1909.85	581.435	25.0817	475.461	80.8173	118.944	1509.11	111.392	1221.3	12.6871	3.66529	1.25679e-08	1.48868e-06
ENSG00000232699.3_2	BDH2P1	chr6	99622620	99623355	+	pseudogene	1245.92	831.9	1330.09	1887.69	1070.47	1245.93	1244.43	2928.01	819.182	438.09	358.197	403.321	421.557	435.183	76.2813	570.233	594.443	516.71	509.922	519.053	495.006	351.143	257.36	908.072	1473.06	479.61	1245.92	466.548	0.325592	-1.61886	1.26617e-08	1.49659e-06
ENSG00000189134.3_3	NKAPL	chr6	28227098	28228736	+	protein_coding_gene	38.2888	66.781	161.143	61.1194	51.4651	50.8542	59.6995	110.141	39.6206	18.8545	28.8205	17.4882	31.7408	10.7332	5.29732	11.3223	17.0165	27.7912	33.7837	16.6363	16.8369	15.2671	7.63355	40.4086	74.9365	21.2032	60.4095	17.2523	0.282987	-1.82119	1.28616e-08	1.51699e-06
ENSG00000085415.15_3	SEH1L	chr18	12947132	12987535	+	protein_coding_gene	2156.42	1984.35	1853.59	1883.68	1541.89	1681.37	1709.67	1863.68	3135.38	2080.65	3652.99	2912.87	2722.77	1999.31	3520.6	3562.42	2785.03	2582.52	2820.93	2641.85	2457.07	3497.26	2547.43	2972.28	1834.33	2868.21	1858.63	2802.98	1.56345	0.644734	1.36004e-08	1.60071e-06
ENSG00000198327.3	HIST1H4F	chr6	26240561	26240976	+	protein_coding_gene	315.499	474.145	414.876	434.849	319.084	202.357	617.581	492.909	126.357	112.018	34.9963	78.6967	101.174	176.61	56.1515	126.604	76.007	232.622	58.0656	202.963	216.635	70.883	145.038	26.9391	408.913	115.11	424.862	106.596	0.281541	-1.82858	1.38133e-08	1.62233e-06
ENSG00000137648.17_3	TMPRSS4	chr11	117947727	117992605	+	protein_coding_gene	2842.56	316.733	178.948	53.1037	220.271	149.384	50.4358	207.196	31.054	36.5999	12.3516	43.7204	21.8218	20.4907	1.05946	15.4395	61.2594	209.978	9.50165	49.9089	22.4492	28.3532	53.4349	4.48985	502.329	38.8695	193.072	25.4012	0.0773635	-3.6922	1.40603e-08	1.64785e-06
ENSG00000232298.2_3	AL138902.1	chr1	24634046	24648391	-	as_lncRNA	57.4331	44.8387	44.5145	14.0274	22.6446	23.3082	27.7912	50.1634	5.35413	7.76361	10.293	7.65107	14.8785	13.6605	10.5946	6.17581	10.2099	22.6446	9.50165	12.2	8.9797	2.18102	20.7196	3.36739	35.5901	10.3859	36.1529	9.85577	0.291805	-1.77692	1.43433e-08	1.67747e-06
ENSG00000220988.1	SNORD88C	chr19	51305585	51305675	-	snoRNA	3.82888	29.5744	18.6961	28.0548	16.4688	36.0217	25.7326	8.72406	78.1703	51.018	130.721	44.8134	41.6598	72.2053	60.3894	115.282	114.578	93.6665	99.2395	36.5999	46.0209	44.7108	44.7108	61.7354	20.8877	70.9701	22.2143	61.0624	3.41318	1.77112	1.45838e-08	1.702e-06
ENSG00000208317.1	SNORD78	chr1	173834760	173834824	-	snoRNA	35.2257	22.8963	17.8058	18.0352	11.3223	13.773	22.6446	5.45254	52.4705	38.8181	94.6958	59.0226	86.2953	62.4478	38.1407	65.8753	61.2594	53.5237	64.4001	35.4908	31.4289	40.3488	29.4437	35.9188	18.3944	53.0988	17.9205	52.9971	2.85922	1.51562	1.48242e-08	1.72642e-06
ENSG00000201342.1	RNU4-38P	chr3	169775089	169775217	+	snRNA	1.53155	4.77007	13.3544	9.01761	10.293	6.35678	5.14651	4.36203	22.4874	23.2908	31.9084	24.0462	37.6922	14.6362	19.0703	29.8498	12.4788	34.9963	24.282	8.8727	16.8369	15.2671	27.2627	23.5717	6.85399	22.9093	5.75164	23.4313	3.36716	1.75153	1.4923e-08	1.73429e-06
ENSG00000162493.16_3	PDPN	chr1	13909960	13944452	+	protein_coding_gene	747.397	292.882	479.867	397.777	483.772	412.131	433.336	470.009	261.282	110.909	107.047	168.324	309.473	223.446	97.4706	170.864	90.7546	234.681	258.656	129.763	191.941	124.318	80.6976	53.8782	464.646	163.344	451.673	149.043	0.351622	-1.5079	1.49652e-08	1.73556e-06
ENSG00000132855.4_3	ANGPTL3	chr1	63063158	63071830	+	protein_coding_gene	6.1262	3.81606	3.56116	6.01174	4.11721	19.0703	4.11721	5.45254	28.9123	32.1635	62.7874	331.182	14.8785	173.683	54.0326	6.17581	9.07546	128.663	11.6131	22.1818	19.0819	115.594	121.046	8.9797	6.53406	71.2531	4.78487	30.5379	10.9401	3.45155	1.52059e-08	1.75645e-06
ENSG00000073067.13_3	CYP2W1	chr7	1022835	1029276	+	protein_coding_gene	11.4866	37.2065	32.9408	6.01174	11.3223	11.6541	10.293	2.18102	4.28331	3.32726	2.0586	4.37204	0.9919	2.92724	2.11893	5.14651	3.4033	4.11721	3.16722	1.10909	4.48985	1.09051	3.27152	1.12246	15.387	2.93731	11.4045	3.21937	0.189827	-2.39724	1.52088e-08	1.75645e-06
ENSG00000119630.13_3	PGF	chr14	75408537	75422487	-	protein_coding_gene	333.112	302.422	146.008	392.767	645.373	118.66	125.575	165.757	51.3997	51.018	77.1977	43.7204	40.6679	140.508	12.7136	19.5567	19.2854	63.8167	60.1771	43.2544	44.8985	80.6976	159.214	14.592	278.709	57.6698	234.09	47.9583	0.206995	-2.27233	1.55956e-08	1.79739e-06
ENSG00000238279.1_3	BX470102.1	chr1	153506079	153507591	+	as_lncRNA	22.9733	16.2182	20.4767	10.0196	7.20512	10.5946	11.3223	4.36203	5.35413	7.76361	3.08791	4.37204	2.9757	3.90299	2.11893	3.08791	1.13443	4.11721	2.11148	4.43635	4.48985	1.09051	1.09051	1.12246	12.8965	3.266	10.9585	3.08791	0.249825	-2.00101	1.56377e-08	1.7985e-06
ENSG00000124839.12_3	RAB17	chr2	238482965	238510257	-	protein_coding_gene	179.957	409.272	388.167	379.742	109.106	689.71	558.911	714.283	1203.61	1048.09	1449.26	1333.47	916.515	2037.36	2493.98	1855.83	972.209	487.889	1507.6	818.507	1554.61	1865.86	984.728	1016.95	428.643	1346.65	398.719	1268.54	3.14268	1.652	1.5853e-08	1.81948e-06
ENSG00000184564.8_3	SLITRK6	chr13	86366925	86373623	-	protein_coding_gene	1043.75	1618.01	1830.44	624.219	1262.95	893.127	476.567	395.854	550.405	312.763	167.776	288.555	212.267	367.857	154.682	122.487	200.795	775.065	351.561	311.654	264.901	310.795	187.567	204.288	1018.11	298.963	968.439	276.728	0.293633	-1.76792	1.66615e-08	1.90832e-06
ENSG00000260412.1_3	AL353746.1	chr9	27937615	27944495	-	lncRNA	13.0182	6.6781	10.6835	34.0665	84.4028	10.5946	4.11721	7.63355	5.35413	7.76361	2.0586	1.09301	1.9838	3.90299	1.05946	3.08791	3.4033	4.11721	2.11148	4.43635	3.36739	3.27152	2.18102	3.36739	21.3993	3.28495	10.6391	3.31945	0.15348	-2.70388	1.67629e-08	1.91598e-06
ENSG00000176895.9_4	OR51A7	chr11	4925013	4930692	+	protein_coding_gene	9.95508	85.8613	2.67087	79.1546	10.293	34.9623	11.3223	2.18102	108.153	157.49	811.09	195.649	634.816	149.289	341.147	774.035	356.212	141.014	695.732	64.3271	71.8376	46.8918	17.4481	720.621	29.5501	330.36	10.8077	176.57	11.1831	3.48325	1.69211e-08	1.93009e-06
ENSG00000128266.8_3	GNAZ	chr22	23412547	23467224	+	protein_coding_gene	333.112	284.296	628.545	328.642	694.779	370.812	477.596	543.073	213.094	141.963	195.567	93.9989	218.218	150.265	66.7462	58.6702	96.4268	218.212	331.502	141.963	178.471	154.852	190.839	68.4702	457.607	157.454	424.204	152.559	0.344179	-1.53877	1.70254e-08	1.93402e-06
ENSG00000006210.6_3	CX3CL1	chr16	57406370	57418960	+	protein_coding_gene	1278.84	403.548	748.735	719.405	987.101	671.7	1105.47	381.678	307.327	292.799	192.48	196.742	455.282	172.707	100.649	263.501	233.693	423.043	387.456	307.217	173.982	250.817	211.559	53.8782	787.06	251.446	734.07	242.255	0.319478	-1.64621	1.70167e-08	1.93402e-06
ENSG00000168306.12_3	ACOX2	chr3	58490863	58523046	-	protein_coding_gene	336.941	482.731	514.588	631.233	979.896	488.412	393.193	261.722	135.995	165.254	123.516	257.95	244.999	143.435	96.4111	34.9963	69.2004	267.619	234.374	138.636	94.2868	70.883	50.1634	41.5311	511.09	135.578	485.572	129.756	0.26535	-1.91403	1.7564e-08	1.99113e-06
ENSG00000158402.18_3	CDC25C	chr5	137620954	137674044	-	protein_coding_gene	35.2257	22.8963	22.2573	37.0724	28.8205	14.8325	27.7912	20.7196	53.5413	46.5817	58.6702	40.4414	60.5059	151.241	188.584	193.509	63.5283	99.8423	43.2853	43.2544	148.165	142.857	230.097	53.8782	26.2019	101.124	25.3437	62.0171	3.85433	1.94648	1.76489e-08	1.99666e-06
ENSG00000176092.14_4	CRYBG2	chr1	26648350	26686543	-	protein_coding_gene	606.494	46.7467	19.5864	10.0196	13.3809	45.5569	15.4395	23.9912	16.0624	7.76361	6.17581	8.74408	10.9109	18.5392	10.5946	16.4688	5.67217	17.4981	10.5574	9.98179	11.2246	8.72406	7.63355	14.592	97.6519	11.3215	21.7888	10.576	0.115787	-3.11045	1.77727e-08	2.00657e-06
ENSG00000186675.6_3	MAGEE2	chrX	75002823	75005071	-	protein_coding_gene	18.3786	7.63211	19.5864	4.00783	15.4395	13.773	15.4395	14.1766	3.21248	1.10909	4.11721	1.09301	5.9514	0.975748	1.05946	1.0293	3.4033	11.3223	2.11148	3.32726	4.48985	2.18102	2.18102	2.24492	13.5542	3.11305	14.8081	2.21297	0.229909	-2.12087	1.7857e-08	2.012e-06
ENSG00000164125.15_3	FAM198B	chr4	159045626	159094470	-	protein_coding_gene	3154.23	2216.17	5495.77	5120	4693.62	3945.44	4072.95	2037.07	13312.5	13912.4	24151.5	19606.4	9238.56	11929.5	9685.61	14139.5	8419.76	6900.44	3987.53	19505.5	9581.34	10904	6076.31	4815.36	3841.91	11635.4	4009.19	10294.8	3.02854	1.59862	1.79258e-08	2.01565e-06
ENSG00000168077.13_3	SCARA3	chr8	27491385	27534293	+	protein_coding_gene	1032.26	609.615	1124.44	682.333	2054.49	637.797	742.127	1329.33	253.786	303.89	302.615	262.322	612.002	274.185	74.1624	203.802	159.955	594.937	388.512	209.618	305.31	354.415	317.338	65.1028	1026.55	292.622	887.196	288.4	0.2851	-1.81046	1.80018e-08	2.0201e-06
ENSG00000187398.11_4	LUZP2	chr11	24518516	25104177	+	protein_coding_gene	1396.77	7138.89	4527.13	4654.09	1595.42	6640.71	2320.05	494	9606.38	9798.79	68230.4	52886.4	43593	31226.9	31259.5	47325.3	40886.1	7812.4	5177.34	22027.6	8582.34	5534.33	2295.52	27401.5	3595.88	25852.7	3423.59	24714.6	7.18955	2.8459	1.80941e-08	2.02636e-06
ENSG00000273733.1_3	AC011472.4	chr19	11331759	11332249	+	as_lncRNA	20.6759	30.5284	40.9534	21.0411	26.7619	30.7244	29.8498	18.5386	17.1332	17.7454	12.3516	13.1161	4.9595	12.6847	9.53517	6.17581	11.3443	13.3809	13.7246	9.98179	12.3471	9.81457	16.3576	10.1022	27.3842	11.9222	28.3058	12.3494	0.434032	-1.20413	1.8224e-08	2.03269e-06
ENSG00000120645.11_3	IQSEC3	chr12	175931	287626	+	protein_coding_gene	89.5957	42.9306	93.4805	81.1585	182.186	55.0921	62.7874	50.1634	63.1787	35.4908	27.7912	10.9301	34.7165	34.1512	11.6541	29.8498	13.6132	32.9377	23.2263	17.7454	22.4492	26.1722	20.7196	16.8369	82.1743	26.3414	71.973	24.6992	0.320901	-1.6398	1.82187e-08	2.03269e-06
ENSG00000171357.5_3	LURAP1	chr1	46669006	46686933	+	protein_coding_gene	395.14	490.363	412.205	363.71	454.952	348.563	377.754	371.863	127.428	97.5997	153.366	132.254	222.186	160.998	30.7244	52.4944	95.2924	242.915	210.092	166.363	114.491	44.7108	40.3488	75.205	401.819	122.904	386.447	120.96	0.305977	-1.7085	1.84432e-08	2.05301e-06
ENSG00000271798.1	SNORA51	chr20	2635713	2635844	+	snoRNA	7.65775	6.6781	4.45145	8.01566	4.11721	5.29732	13.3809	10.9051	52.4705	22.1818	20.586	14.2091	12.8947	30.2482	18.0109	30.8791	27.2264	20.586	10.5574	24.3999	15.7145	27.2627	30.5342	25.8166	7.56294	23.9736	7.16792	23.2908	3.18534	1.67145	1.89689e-08	2.10308e-06
ENSG00000122986.13_3	HVCN1	chr12	111065646	111142755	-	protein_coding_gene	261.895	171.723	232.366	272.532	315.996	168.455	310.849	218.102	94.2327	159.709	95.7251	93.9989	175.566	143.435	104.887	121.458	88.4858	153.366	108.741	131.981	141.43	131.951	101.417	46.0209	243.99	118.275	247.131	115.099	0.48497	-1.04403	1.89516e-08	2.10308e-06
ENSG00000139800.8_3	ZIC5	chr13	100615218	100624163	-	protein_coding_gene	7.65775	1.90803	0.890291	44.0861	1.0293	1.05946	3.08791	3.27152	44.9747	336.054	188.362	396.763	74.3925	63.4236	226.725	639.197	240.5	81.3149	1.05574	100.927	131.328	53.4349	3.27152	1.12246	7.8738	161.428	2.49797	91.1209	20.5023	4.35771	1.90325e-08	2.10592e-06
ENSG00000258973.1_4	AL096870.1	chr14	24801516	24806588	-	protein_coding_gene	92.6588	53.4248	72.1136	42.0822	54.553	67.8056	78.227	66.521	27.8415	28.8363	28.8205	28.4183	39.676	43.9086	22.2487	33.967	30.6297	52.4944	28.505	25.509	16.8369	27.2627	29.4437	10.1022	65.9232	29.6563	67.1633	28.6627	0.45036	-1.15085	1.91525e-08	2.11497e-06
ENSG00000280012.2_2	RPL23AP61	chr10	51532107	51532572	-	pseudogene	0.765775	3.81606	0.890291	3.00587	1.0293	5.29732	4.11721	5.45254	4.28331	48.7999	37.0549	38.2554	29.757	80.9871	64.6272	5.14651	10.2099	10.293	32.7279	1.10909	12.3471	43.6203	5.45254	43.776	3.04679	29.2779	3.41096	31.2425	9.76406	3.28748	1.93267e-08	2.12997e-06
ENSG00000170190.15_4	SLC16A5	chr17	73083822	73102257	+	protein_coding_gene	725.955	957.83	1425.36	407.797	487.889	852.868	683.457	580.15	310.54	98.7088	84.4028	118.045	283.683	149.289	25.4271	38.0842	48.7806	374.666	271.325	106.472	80.8173	42.5298	175.572	15.7145	765.163	139.004	704.706	102.591	0.181701	-2.46036	1.9368e-08	2.13028e-06
ENSG00000198467.13_3	TPM2	chr9	35681989	35691017	-	protein_coding_gene	16485.6	17427.9	26251.1	12767.9	22302.9	16329.5	21974.6	15384.9	8093.3	7229.03	4406.44	2888.83	7691.19	3776.14	1116.67	1606.74	3891.11	5704.39	10785.4	4572.77	10028.1	5889.83	1682.65	2362.78	18615.6	5107.84	16956.8	4489.61	0.274385	-1.86572	1.96241e-08	2.15418e-06
ENSG00000142961.14_3	MOB3C	chr1	47073387	47082563	-	protein_coding_gene	1234.43	888.187	993.565	838.638	822.412	777.646	936.665	871.316	536.484	397.053	481.713	558.528	506.861	725.956	630.381	409.662	325.582	485.831	676.729	566.744	441.128	563.792	449.289	251.431	920.357	500.448	879.751	496.346	0.543733	-0.879029	1.98193e-08	2.17131e-06
ENSG00000273523.1_3	AL139082.1	chr13	52703027	52706859	+	as_lncRNA	0.765775	1.90803	0.890291	1.00196	1.0293	5.29732	2.0586	2.18102	5.35413	14.4181	16.4688	13.1161	19.838	38.0542	21.1893	16.4688	15.8821	4.11721	8.44591	4.43635	12.3471	22.9007	3.27152	5.61231	1.89154	13.87	1.46867	13.7671	7.5467	2.91585	2.0158e-08	2.20406e-06
ENSG00000225950.8_3	NTF4	chr19	49564323	49568311	-	protein_coding_gene	100.317	163.136	175.387	105.205	95.7251	169.514	142.044	68.702	38.5497	19.9636	10.293	40.4414	37.6922	40.9814	3.17839	6.17581	7.94103	47.3479	33.7837	36.5999	12.3471	2.18102	4.36203	2.24492	127.504	21.5052	123.625	16.1553	0.168863	-2.56607	2.02916e-08	2.2143e-06
ENSG00000171680.21_3	PLEKHG5	chr1	6526152	6580121	-	protein_coding_gene	468.654	310.055	383.715	269.526	512.593	344.326	440.541	196.291	115.649	129.763	120.428	122.417	171.599	222.47	104.887	52.4944	98.6957	248.062	219.594	145.29	139.185	91.6026	143.947	44.8985	365.713	135.686	364.02	126.09	0.371099	-1.43013	2.04508e-08	2.22729e-06
ENSG00000070808.15_3	CAMK2A	chr5	149599054	149669854	-	protein_coding_gene	81.9379	60.1029	39.1728	35.0685	90.5786	34.9623	31.9084	25.0817	13.9207	28.8363	14.4102	9.83709	16.8623	13.6605	6.35678	10.293	15.8821	33.967	25.3377	17.7454	19.0819	18.5386	16.3576	14.592	49.8516	17.2299	37.1206	16.1198	0.344625	-1.5369	2.07395e-08	2.2543e-06
ENSG00000180532.10_3	ZSCAN4	chr19	58180303	58190520	+	protein_coding_gene	19.1444	17.1723	15.1349	3.00587	10.293	9.53517	4.11721	20.7196	8.56661	3.32726	1.0293	3.27903	0.9919	0.975748	1.05946	1.0293	3.4033	2.0586	2.11148	4.43635	2.24492	3.27152	1.09051	2.24492	12.3903	2.57001	12.714	2.1782	0.204633	-2.28889	2.11219e-08	2.29138e-06
ENSG00000166869.2_3	CHP2	chr16	23765948	23770272	+	protein_coding_gene	194.507	128.792	226.134	48.0939	79.2563	65.6867	107.047	80.6976	28.9123	8.8727	10.293	28.4183	38.6841	8.78173	1.05946	4.11721	9.07546	34.9963	2.11148	46.5817	2.24492	4.36203	5.45254	1.12246	116.277	14.6929	93.8725	8.82722	0.126392	-2.98403	2.13831e-08	2.31518e-06
ENSG00000198300.12_3	PEG3	chr19	57321451	57352096	-	protein_coding_gene	984.021	967.37	1516.17	983.922	1428.67	1007.55	945.929	922.57	653.204	433.653	697.867	573.83	950.24	458.601	550.921	684.486	504.823	648.46	830.867	615.544	581.435	657.576	497.272	703.784	1094.52	627.66	983.971	632.002	0.57348	-0.802184	2.14411e-08	2.31694e-06
ENSG00000204682.5_3	CASC10	chr10	21781587	21786191	-	protein_coding_gene	32.1626	23.8503	37.3922	26.0509	53.5237	22.2487	41.1721	34.8962	4.28331	11.0909	9.26372	10.9301	11.9028	12.6847	5.29732	5.14651	14.7476	22.6446	7.39017	9.98179	7.85723	20.7196	25.0817	7.85723	33.9121	11.68	33.5294	10.4559	0.344514	-1.53737	2.16753e-08	2.33768e-06
ENSG00000159263.15_3	SIM2	chr21	38071433	38122218	+	protein_coding_gene	191.444	2935.5	106.835	1639.2	880.053	1732.22	710.219	9.81457	3199.63	7580.61	17233.6	5079.22	7150.61	5849.61	23138.7	14549.2	9583.69	2725.59	21341.8	2622.99	5518.02	6017.42	2418.75	8760.82	1025.66	8923.14	795.136	6584.01	8.70009	3.12103	2.20978e-08	2.37862e-06
ENSG00000148773.13_3	MKI67	chr10	129894923	129924649	-	protein_coding_gene	75.046	57.2408	63.2106	139.272	369.52	65.6867	258.355	142.857	285.911	196.309	1080.77	504.971	647.711	932.815	1436.63	1003.57	436.757	396.281	590.158	159.709	772.254	1113.41	1692.47	244.697	146.398	718.401	107.159	618.934	4.90958	2.2956	2.32869e-08	2.50176e-06
ENSG00000140519.12_3	RHCG	chr15	90014629	90039844	-	protein_coding_gene	152.389	58.1949	7.12233	25.0489	14.4102	62.5083	20.586	46.8918	11.7791	7.76361	8.23442	12.0231	0.9919	10.7332	2.11893	6.17581	12.4788	16.4688	5.2787	17.7454	2.24492	8.72406	5.45254	2.24492	48.394	8.15364	35.9704	7.99902	0.168045	-2.57308	2.33938e-08	2.50838e-06
ENSG00000170955.9_4	CAVIN3	chr11	6340176	6341877	-	protein_coding_gene	271.85	208.929	318.724	197.386	181.157	258.509	279.97	197.382	88.8786	60.9998	83.3735	55.7435	85.3034	114.162	61.4489	47.3479	120.25	95.7251	153.082	88.727	216.635	116.684	87.2406	41.5311	239.238	94.8208	233.719	87.9838	0.396165	-1.33583	2.3473e-08	2.51202e-06
ENSG00000138271.5_3	GPR87	chr3	151011874	151034740	-	protein_coding_gene	918.93	560.96	481.647	395.773	308.791	536.088	367.461	594.327	207.74	72.0907	43.2307	130.068	157.712	91.7203	2.11893	68.9632	63.5283	174.981	62.2886	135.309	70.7151	19.6291	21.8102	4.48985	520.497	82.8997	508.868	69.8392	0.15929	-2.65027	2.35635e-08	2.51684e-06
ENSG00000258604.1_4	AL161668.3	chr14	21492331	21497430	+	lncRNA	12.2524	9.54014	16.0252	17.0333	13.3809	11.6541	25.7326	19.6291	8.56661	5.54544	5.14651	2.18602	4.9595	6.83023	2.11893	3.08791	5.67217	9.26372	1.05574	9.98179	1.12246	4.36203	4.36203	3.36739	15.656	4.85178	14.7031	4.66077	0.311933	-1.68069	2.4122e-08	2.57154e-06
ENSG00000272634.2_3	AC103710.2	chr11	4730799	4733651	+	pseudogene	5.36043	22.8963	2.67087	37.0724	2.0586	6.35678	3.08791	2.18102	124.216	38.8181	273.794	96.1849	283.683	72.2053	198.12	232.622	31.7641	20.586	326.223	11.0909	34.7963	15.2671	3.27152	255.921	10.2105	126.16	4.22417	84.1951	12.3584	3.62742	2.42552e-08	2.57588e-06
ENSG00000119919.10_3	NKX2-3	chr10	101292690	101296281	+	protein_coding_gene	0.765775	0.954014	0.890291	7.0137	1.0293	4.23785	1.0293	3.27152	13.9207	23.2908	21.6153	7.65107	2.9757	32.1997	141.968	24.7033	40.8396	18.5274	5.2787	28.8363	11.2246	26.1722	10.9051	3.36739	2.39897	25.8422	1.0293	20.0714	10.939	3.45141	2.42556e-08	2.57588e-06
ENSG00000167332.8_4	OR51E2	chr11	4701401	4719084	-	protein_coding_gene	551.358	18330.4	251.062	3359.56	1460.58	3031.12	1928.91	295.528	8467.02	38813.6	71347.1	24585.1	55668.4	29941.8	34557.6	20837.2	21493	25525.7	30000.9	23802.1	19015.6	26197.3	2403.48	81378.5	3651.07	32127.1	1694.75	25861.5	8.79939	3.1374	2.45254e-08	2.59955e-06
ENSG00000257259.1_3	LINC02388	chr12	58959743	59175529	-	lncRNA	376.761	84.9072	52.5272	302.591	1338.09	42.3785	40.1428	91.6026	69.6037	88.727	53.5237	36.0693	44.6355	37.0784	12.7136	27.7912	26.092	101.901	26.3935	21.0727	24.6942	18.5386	26.1722	29.184	291.125	40.2619	88.2549	28.4876	0.138331	-2.8538	2.46994e-08	2.613e-06
ENSG00000242781.1_2	LINC02050	chr3	80814048	80838505	+	lncRNA	13.784	2.86204	1.78058	12.0235	6.17581	5.29732	7.20512	8.72406	522.563	17.7454	442.6	1255.87	194.412	37.0784	8.4757	1.0293	17.0165	5.14651	11.6131	78.7452	519.7	2.18102	892.035	8.9797	7.23155	250.949	6.69046	27.4119	34.6729	5.11574	2.49961e-08	2.63433e-06
ENSG00000115844.10_3	DLX2	chr2	172964167	172967628	-	protein_coding_gene	2.29733	0.954014	1.78058	9.01761	1.0293	1.05946	2.0586	4.36203	7.49578	11.0909	20.586	17.4882	16.8623	12.6847	9.53517	60.7288	10.2099	3.08791	6.33443	13.3091	49.3883	115.594	58.8874	32.5514	2.81987	27.8646	1.91959	15.0857	9.92439	3.31098	2.49906e-08	2.63433e-06
ENSG00000196090.12_3	PTPRT	chr20	40701392	41818610	-	protein_coding_gene	846.182	906.313	285.783	1302.54	598.025	262.747	516.71	642.309	664.983	6697.78	1108.56	2719.41	4075.72	2059.8	2756.72	11397.5	2389.12	620.669	3771.1	1366.4	6337.42	1633.58	10643.4	2403.19	670.077	3790.33	620.167	2561.3	5.65643	2.49989	2.50944e-08	2.63967e-06
ENSG00000198832.10_3	SELENOM	chr22	31500758	31516055	-	protein_coding_gene	2139.58	1686.7	2954.88	1717.35	1007.69	2907.17	2916.01	3983.62	1024.78	723.125	592.878	709.364	614.978	963.063	370.812	370.549	498.016	676.252	1055.74	800.761	1873.39	1358.77	1124.31	683.579	2414.12	840.023	2523.37	716.244	0.347957	-1.52302	2.52399e-08	2.64995e-06
ENSG00000213406.3_2	ANXA2P1	chr4	154228944	154229869	-	pseudogene	143.966	92.5394	110.396	144.282	58.6702	64.6272	69.9926	181.024	50.3288	41.0362	20.586	19.6742	30.7489	48.7874	50.8542	41.1721	22.6887	45.2893	52.787	26.6181	74.0825	35.9868	53.4349	16.8369	108.187	39.432	101.468	41.1042	0.364421	-1.45632	2.58973e-08	2.71383e-06
ENSG00000109832.13_3	DDX25	chr11	125773243	125813597	+	protein_coding_gene	19.9102	18.1263	42.734	11.0215	19.5567	22.2487	30.8791	31.6247	11.7791	13.3091	6.17581	6.55806	13.8866	9.75748	8.4757	9.26372	14.7476	5.14651	6.33443	6.65453	8.9797	3.27152	9.81457	3.36739	24.5126	8.59511	21.0794	8.7277	0.350809	-1.51124	2.62979e-08	2.75061e-06
ENSG00000108342.12_3	CSF3	chr17	38171614	38174066	+	protein_coding_gene	1556.82	6.6781	5.34175	42.0822	13.3809	2.11893	9.26372	10.9051	19.2749	3.32726	8.23442	6.55806	3.9676	1.9515	1.05946	21.6153	11.3443	2.0586	11.6131	1.10909	4.48985	2.18102	1.09051	1.12246	205.824	6.31234	10.0844	3.64743	0.030665	-5.02726	2.657e-08	2.77383e-06
ENSG00000174482.10_3	LINGO2	chr9	27948076	28670284	-	protein_coding_gene	1200.74	684.028	571.567	1656.23	7358.48	319.958	272.765	284.623	294.477	303.89	134.839	155.207	267.813	233.204	41.3191	142.044	119.115	865.643	101.351	140.854	110.001	64.34	115.594	120.103	1543.55	200.612	627.797	137.846	0.129983	-2.94361	2.73352e-08	2.84836e-06
ENSG00000226650.5_3	KIF4B	chr5	154393315	154397692	+	protein_coding_gene	12.2524	14.3102	10.6835	17.0333	22.6446	19.0703	25.7326	7.63355	29.9831	27.7272	47.3479	32.7903	38.6841	80.0113	149.384	97.7837	32.8986	36.0256	46.4525	27.7272	127.961	149.4	164.667	40.4086	16.1701	70.5782	15.6717	43.4306	4.37277	2.12855	2.78252e-08	2.88316e-06
ENSG00000243811.8_3	APOBEC3D	chr22	39417118	39429281	+	protein_coding_gene	138.605	134.516	171.826	112.219	138.956	150.444	269.677	191.929	49.258	70.9816	43.2307	45.9064	130.931	58.5449	24.3677	48.3772	34.033	113.223	35.8951	60.9998	42.6536	26.1722	25.0817	15.7145	163.522	51.5856	144.7	44.5686	0.315905	-1.66244	2.77584e-08	2.88316e-06
ENSG00000198491.3_3	AC007920.1	chr3	186914878	186925417	-	as_lncRNA	29.8652	11.4482	20.4767	27.0528	77.1977	19.0703	9.26372	21.8102	6.42496	5.54544	7.20512	3.27903	17.8542	5.85449	2.11893	10.293	5.67217	11.3223	5.2787	4.43635	4.48985	6.54305	3.27152	4.48985	27.0231	6.50494	21.1434	5.6088	0.242198	-2.04574	2.78165e-08	2.88316e-06
ENSG00000182534.13_4	MXRA7	chr17	74668633	74707098	-	protein_coding_gene	4045.59	5269.97	6523.16	4215.23	6071.85	4100.12	4438.35	2290.07	1781.85	1133.49	1285.6	861.292	1757.65	2900.9	841.214	1893.92	1167.33	1639.68	1616.34	1461.78	3348.3	2029.43	2644.48	606.13	4619.29	1685.59	4326.79	1628.01	0.364903	-1.45441	2.79653e-08	2.89227e-06
ENSG00000143382.14_3	ADAMTSL4	chr1	150521845	150533413	+	protein_coding_gene	164.642	31.4825	48.966	43.0842	52.4944	40.2596	56.6116	51.2539	19.2749	17.7454	26.7619	13.1161	23.8056	25.3694	14.8325	19.5567	27.2264	18.5274	41.1738	14.4181	28.0616	19.6291	10.9051	13.4695	61.0992	20.8671	50.1099	19.4158	0.340359	-1.55487	2.80328e-08	2.89385e-06
ENSG00000237353.6_3	PATE4	chr11	125703211	125709964	+	protein_coding_gene	9.95508	4.77007	8.01262	1.00196	1.0293	1.05946	2.0586	1396.94	3.21248	6.65453	1.0293	2.18602	3.9676	1.9515	3.17839	3.08791	2.26887	2.0586	1.05574	1.10909	8.9797	4.36203	6.54305	15.7145	178.103	4.20995	3.41434	3.13315	0.0236036	-5.40485	2.87694e-08	2.96437e-06
ENSG00000237061.1_4	AC100823.1	chr8	73996022	73998114	-	lncRNA	45.9465	17.1723	28.4893	46.09	84.4028	9.53517	15.4395	28.3532	12.8499	5.54544	13.3809	2.18602	10.9109	4.87874	2.11893	1.0293	5.67217	16.4688	10.5574	5.54544	8.9797	3.27152	1.09051	3.36739	34.4286	6.74082	28.4213	5.54544	0.196215	-2.3495	2.88676e-08	2.96897e-06
ENSG00000217576.7_4	AL158066.1	chr13	52741844	52865692	-	lncRNA	349.193	1011.25	895.633	775.515	901.669	784.003	626.845	521.263	1077.25	2459.96	4148.09	2355.44	2608.7	8153.35	2275.73	2596.93	2397.06	1506.9	5235.41	1001.51	1624.2	1320.6	1324.97	1541.14	733.172	2601.7	779.759	2315.58	3.54879	1.82733	2.92056e-08	2.98906e-06
ENSG00000237172.3_3	B3GNT9	chr16	67182008	67185117	-	protein_coding_gene	376.761	234.687	504.795	303.593	457.01	379.288	522.886	468.918	130.641	141.963	138.956	198.928	151.761	188.319	84.757	56.6116	64.6627	166.747	203.758	199.636	193.063	153.762	45.8013	30.3065	405.992	134.355	418.149	146.862	0.330993	-1.59513	2.92247e-08	2.98906e-06
ENSG00000224984.1_3	AL512363.1	chr6	54704916	54705653	-	as_lncRNA	1.53155	20.9883	27.599	8.01566	14.4102	12.7136	14.4102	6.54305	7.49578	2.21818	1.0293	2.18602	1.9838	5.85449	2.11893	3.08791	2.26887	2.0586	3.16722	2.21818	1.12246	1.09051	1.09051	2.24492	13.2764	2.57723	13.5619	2.2021	0.195364	-2.35576	2.91481e-08	2.98906e-06
ENSG00000207621.1	MIR224	chrX	151127050	151127130	-	miRNA	20.6759	9.54014	27.599	8.01566	12.3516	20.1298	8.23442	13.0861	5.35413	3.32726	2.0586	3.27903	7.9352	4.87874	2.11893	2.0586	1.13443	11.3223	1.05574	4.43635	1.12246	1.09051	2.18102	1.12246	14.9541	3.40474	12.7189	2.14997	0.228972	-2.12676	2.94775e-08	3.00936e-06
ENSG00000167580.7_3	AQP2	chr12	50344524	50352664	+	protein_coding_gene	22.9733	5.72408	8.01262	20.0391	19.5567	1.05946	2.0586	286.804	1.07083	7.76361	3.08791	1.09301	1.9838	6.83023	1.05946	1.0293	1.13443	1.0293	1.05574	1.10909	2.24492	1.09051	5.45254	10.1022	45.7784	2.94605	13.7847	1.12176	0.0643841	-3.95715	2.96844e-08	3.02491e-06
ENSG00000232320.6_3	AC009299.2	chr2	162197327	162197837	-	pseudogene	796.406	1072.31	1336.33	780.525	933.577	832.738	941.812	560.521	407.985	228.472	240.857	173.789	334.27	513.243	156.801	332.465	229.155	362.314	372.676	293.908	727.355	528.896	410.031	135.818	906.777	340.502	883.158	333.367	0.375502	-1.41311	3.00589e-08	3.05746e-06
ENSG00000140859.15_3	KIFC3	chr16	57792129	57896957	-	protein_coding_gene	1226.77	429.306	643.68	393.769	510.534	485.234	548.618	429.66	273.061	260.636	183.216	243.741	335.262	262.476	157.86	190.421	149.745	324.23	295.607	232.908	266.024	191.929	148.309	53.8782	583.447	223.081	497.884	238.325	0.382273	-1.38733	3.03764e-08	3.0841e-06
ENSG00000143196.4_3	DPT	chr1	168664697	168698502	-	protein_coding_gene	1584.39	373.973	457.609	1441.82	971.661	491.591	785.358	631.404	345.877	160.818	304.673	108.208	158.704	99.5263	11.6541	45.2893	196.257	303.644	350.505	78.7452	85.3071	126.499	22.9007	72.96	842.225	154.473	708.381	117.353	0.183417	-2.4468	3.11875e-08	3.16066e-06
ENSG00000176857.5_2	GJA1P1	chr5	108387016	108388158	-	pseudogene	20.6759	8.58613	22.2573	15.0294	11.3223	13.773	9.26372	16.3576	3.21248	4.43635	5.14651	4.37204	7.9352	7.80598	3.17839	2.0586	3.4033	8.23442	6.33443	3.32726	4.48985	1.09051	7.63355	4.48985	14.6582	4.8218	14.4012	4.4631	0.328617	-1.60552	3.1507e-08	3.1814e-06
ENSG00000178934.4_3	LGALS7B	chr19	39279851	39282389	+	protein_coding_gene	19.9102	6.6781	6.23204	1.00196	4.11721	9.53517	6.17581	6.54305	2.14165	1.10909	1.0293	1.09301	0.9919	0.975748	1.05946	1.0293	1.13443	1.0293	1.05574	1.10909	1.12246	1.09051	2.18102	1.12246	7.52419	1.20465	6.38754	1.09176	0.156709	-2.67384	3.1484e-08	3.1814e-06
ENSG00000225356.3_3	AC093840.1	chr4	182443819	182444154	+	pseudogene	323.923	681.166	636.558	398.779	292.322	480.996	473.479	725.188	1642.65	1438.49	1592.33	1218.71	913.54	2042.24	2014.04	868.731	604.653	754.479	817.142	970.452	676.845	1507.08	1250.81	1444.61	501.551	1234.8	477.238	1234.76	2.46229	1.3	3.17961e-08	3.20475e-06
ENSG00000166250.11_3	CLMP	chr11	122940573	123065989	-	protein_coding_gene	1958.85	740.315	1096.84	1130.21	1636.59	875.117	1057.09	796.071	495.793	490.217	531.12	385.833	702.265	407.863	164.217	298.498	373.228	760.654	482.473	314.981	474.801	549.616	129.77	308.677	1161.39	429.375	1076.97	441.332	0.369702	-1.43557	3.25068e-08	3.27044e-06
ENSG00000108352.11_4	RAPGEFL1	chr17	38333263	38351908	+	protein_coding_gene	568.971	244.228	365.91	118.231	329.377	218.249	200.714	143.947	65.3204	67.6543	169.835	63.3946	111.093	91.7203	150.444	66.9046	70.3349	162.63	125.633	57.6726	58.368	97.0552	93.7837	44.8985	273.703	93.5463	231.238	81.0276	0.3417	-1.5492	3.27243e-08	3.27793e-06
ENSG00000139269.2_3	INHBE	chr12	57846106	57853063	+	protein_coding_gene	27.5679	41.9766	21.367	38.0744	21.6153	31.7839	14.4102	2.18102	12.8499	5.54544	2.0586	6.55806	6.9433	8.78173	2.11893	2.0586	2.26887	8.23442	11.6131	2.21818	4.48985	3.27152	2.18102	7.85723	24.872	5.56555	24.5916	5.01764	0.223965	-2.15866	3.26692e-08	3.27793e-06
ENSG00000171873.7_3	ADRA1D	chr20	4201278	4229721	-	protein_coding_gene	42.8834	22.8963	33.8311	38.0744	65.8753	9.53517	14.4102	26.1722	12.8499	8.8727	8.23442	8.74408	8.9271	1.9515	1.05946	1.0293	4.53773	7.20512	21.1148	4.43635	2.24492	9.81457	5.45254	5.61231	31.7098	7.00542	30.0016	6.40871	0.220661	-2.1801	3.27586e-08	3.27793e-06
ENSG00000157388.15_3	CACNA1D	chr3	53362990	53847760	+	protein_coding_gene	2366.25	3902.87	7781.14	3809.44	10190.1	5664.95	3622.11	1368.59	20976.4	48037.9	71086.7	85286.5	99871.4	33927.7	3984.64	6484.6	20725	21658.6	9599.84	21288.9	18574.5	5930.18	23535.3	8766.43	4838.18	31233.4	3856.16	21132.7	6.45563	2.69056	3.30712e-08	3.30325e-06
ENSG00000243479.3_2	MNX1-AS1	chr7	156803499	156809120	+	lncRNA	3.0631	0.954014	14.2447	8.01566	1.0293	5.29732	2.0586	2.18102	13.9207	18.8545	11.3223	123.51	13.8866	14.6362	199.179	46.3186	27.2264	10.293	3.16722	47.6908	47.1434	346.781	61.0684	10.1022	4.60546	62.1938	2.62206	23.0404	13.4467	3.74918	3.31375e-08	3.30392e-06
ENSG00000249885.1_3	ARHGEF38-IT1	chr4	106482748	106491395	+	lncRNA	212.885	479.869	359.678	754.474	450.834	671.7	412.75	226.826	2344.04	810.743	1924.8	2151.04	4392.13	1356.29	548.802	2663.83	2196.26	2219.18	3484.99	905.016	822.765	725.188	415.483	1465.94	446.127	1776.66	431.792	1695.37	3.98291	1.99382	3.35008e-08	3.33414e-06
ENSG00000132819.16_3	RBM38	chr20	55966463	55984389	+	protein_coding_gene	544.466	420.72	602.727	371.726	669.046	350.682	453.922	288.985	164.907	210.727	221.3	156.3	309.473	216.616	258.509	232.622	120.25	284.087	328.335	150.836	184.084	231.188	176.662	87.552	462.784	208.341	437.321	213.671	0.450257	-1.15118	3.36259e-08	3.3406e-06
ENSG00000170891.10_3	CYTL1	chr4	5016313	5021199	-	protein_coding_gene	130.182	82.0452	186.071	276.54	290.263	264.866	205.86	95.9647	168.12	49.9089	20.586	37.1624	34.7165	32.1997	10.5946	29.8498	46.5118	84.4028	21.1148	48.7999	41.5311	29.4437	45.8013	8.9797	191.474	44.3577	195.966	35.9394	0.231692	-2.10972	3.38851e-08	3.36032e-06
ENSG00000156006.4_3	NAT2	chr8	18248755	18258728	+	protein_coding_gene	21.4417	26.7124	30.2699	88.1722	85.4321	23.3082	15.4395	29.4437	13.9207	12.2	17.4981	8.74408	7.9352	2.92724	7.41624	7.20512	4.53773	14.4102	17.9476	16.6363	12.3471	7.63355	2.18102	4.48985	40.0275	9.87688	28.078	8.33964	0.247059	-2.01707	3.4034e-08	3.36906e-06
ENSG00000152137.6_3	HSPB8	chr12	119616447	119658936	+	protein_coding_gene	4554.83	2955.54	4830.72	2662.2	4427.03	2844.66	2837.79	2009.81	1915.71	1447.36	1078.71	1136.73	1967.93	1089.91	1507.62	997.394	739.65	1497.63	2427.14	981.543	1712.88	2256.26	787.347	790.213	3390.32	1395.88	2900.1	1292.05	0.411714	-1.28029	3.42009e-08	3.37191e-06
ENSG00000131016.16_3	AKAP12	chr6	151561134	151679692	+	protein_coding_gene	32586.8	6963.35	17451.5	9145.86	10959	8631.45	4999.32	10835.3	5334.86	2651.83	2580.46	2368.55	5760.95	1553.39	1520.33	6024.51	3835.52	3964.87	4013.92	2237.03	3637.9	7760.05	4328.23	2390.84	12696.6	3747.7	9990.57	3736.71	0.29517	-1.76038	3.41565e-08	3.37191e-06
ENSG00000165863.16_3	C10orf82	chr10	118423207	118429775	-	protein_coding_gene	58.9647	31.4825	343.652	59.1155	30.8791	79.4597	34.9963	200.653	66.3912	2.21818	2.0586	4.37204	20.8299	3.90299	1.05946	2.0586	1.13443	19.5567	7.39017	4.43635	4.48985	3.27152	6.54305	2.24492	104.9	9.49738	59.0401	4.13752	0.0906413	-3.46369	3.42453e-08	3.37191e-06
ENSG00000103710.10_3	RASL12	chr15	65345675	65369028	-	protein_coding_gene	1938.18	1196.33	2072.6	1394.72	2674.13	975.766	1379.26	604.141	584.671	527.926	489.948	308.229	643.743	322.972	73.103	199.685	288.146	616.552	944.886	365.999	521.945	609.594	242.093	179.594	1529.39	432.443	1386.99	427.973	0.282753	-1.82239	3.44158e-08	3.38269e-06
ENSG00000086570.12_3	FAT2	chr5	150883654	150948505	-	protein_coding_gene	1499.39	967.37	1440.49	510.998	1880.54	749.04	730.805	500.543	190.607	100.927	89.5493	210.951	475.12	107.332	18.0109	50.4358	52.1839	398.34	329.391	116.454	50.5108	26.1722	13.0861	17.9594	1034.9	140.439	858.205	95.2381	0.135731	-2.88118	3.44938e-08	3.38436e-06
ENSG00000247011.2_3	AC005920.1	chr17	49012350	49022074	-	lncRNA	32.9283	80.1372	98.8223	47.092	25.7326	92.1733	106.018	66.521	159.553	393.726	821.383	333.368	570.342	736.689	293.471	211.007	229.155	102.93	140.413	108.691	95.4093	282.442	175.572	150.41	68.6781	300.285	73.3291	220.081	4.37484	2.12923	3.49752e-08	3.42553e-06
ENSG00000066279.17_3	ASPM	chr1	197053258	197115824	-	protein_coding_gene	100.317	84.9072	67.6621	237.464	248.062	65.6867	216.153	67.6115	238.794	225.145	335.553	432.832	405.687	554.225	989.539	1594.39	487.806	536.266	263.935	226.254	663.375	804.795	1861.5	297.452	135.983	619.846	92.6119	460.319	4.55936	2.18883	3.62633e-08	3.54543e-06
ENSG00000134057.14_3	CCNB1	chr5	68462837	68474072	+	protein_coding_gene	173.065	309.101	233.256	282.552	180.128	210.833	339.67	233.369	452.96	334.944	633.021	367.251	281.7	751.326	835.916	811.09	351.674	488.919	424.407	428.108	790.213	972.733	700.106	550.006	245.247	573.398	233.312	519.462	2.33861	1.22565	3.65538e-08	3.56754e-06
ENSG00000225091.3	SNORA71A	chr20	37055952	37056085	-	snoRNA	1026.14	1900.4	2285.38	1496.92	356.139	1433.45	2333.43	799.342	15918.9	8800.61	4682.3	4719.62	2449.99	5804.72	2629.59	6581.36	5575.74	3345.23	1209.88	7049.36	3818.62	5965.08	3063.24	10694.8	1453.9	5769.32	1465.19	5147.68	3.9681	1.98845	3.72526e-08	3.62934e-06
ENSG00000185739.13_3	SRL	chr16	4239375	4292081	-	protein_coding_gene	114.866	65.827	104.164	65.1272	130.721	50.8542	82.3442	37.0773	25.6998	46.5817	31.9084	17.4882	44.6355	22.4422	13.773	14.4102	14.7476	43.2307	45.3968	15.5272	41.5311	29.4437	30.5342	14.592	81.3727	28.2464	74.0856	27.5718	0.346873	-1.52752	3.73741e-08	3.63479e-06
ENSG00000164736.5_3	SOX17	chr8	55370495	55373448	+	protein_coding_gene	836.226	54.3788	84.5776	83.1624	111.165	72.0435	83.3735	93.7837	53.5413	41.0362	21.6153	46.9994	71.4168	49.7631	19.0703	31.9084	36.3019	26.7619	58.0656	22.1818	25.8166	28.3532	35.9868	16.8369	177.339	36.6035	83.9756	33.9476	0.206208	-2.27783	3.9316e-08	3.81696e-06
ENSG00000233485.1_4	AL031283.2	chr1	15653176	15670372	-	as_lncRNA	166.939	131.654	1400.43	154.301	340.699	711.959	297.468	607.413	180.97	36.5999	17.4981	12.0231	226.153	19.515	7.41624	10.293	13.6132	123.516	9.50165	42.1453	22.4492	21.8102	9.81457	10.1022	476.358	47.7138	319.084	18.5065	0.100219	-3.31878	3.94459e-08	3.82287e-06
ENSG00000090889.11_3	KIF4A	chrX	69509940	69640682	+	protein_coding_gene	56.6674	30.5284	30.2699	52.1018	85.4321	22.2487	98.813	40.3488	86.7369	78.7452	127.633	88.5338	178.542	253.694	419.547	301.586	145.207	189.392	158.361	67.6543	344.596	355.506	513.629	95.4093	52.0513	212.798	46.2253	168.451	4.08938	2.03188	4.00926e-08	3.87877e-06
ENSG00000169891.17_3	REPS2	chrX	16964814	17171403	+	protein_coding_gene	2299.62	12468	3544.25	8016.66	8474.25	5811.16	5017.85	3119.94	12416.2	16198.2	23736.7	17922.1	22728.4	23303.8	47066.6	25523.6	18173.6	11066	35581.6	11493.5	5707.72	17357.6	14018.5	49452.3	6093.97	21984.2	5414.5	18047.9	3.60756	1.85102	4.08236e-08	3.94261e-06
ENSG00000196756.11_3	SNHG17	chr20	37049235	37063996	-	lncRNA	2049.21	3209.3	3875.44	2824.52	764.772	2235.47	3641.67	1147.21	23834.5	14382.6	7995.62	7247.75	4289.97	9535.98	4544.04	12208.6	7685.78	4967.41	2403.92	9330.75	6400.28	8247.51	4797.14	14610	2468.45	8905.11	2529.99	7840.7	3.60751	1.851	4.11492e-08	3.96339e-06
ENSG00000138160.5_3	KIF11	chr10	94353043	94415152	+	protein_coding_gene	156.218	287.158	269.758	365.714	330.406	216.13	276.882	157.033	404.772	332.726	548.618	484.204	374.938	708.393	980.003	1076.65	478.731	473.479	486.696	404.817	731.845	913.845	1112.32	732.968	257.413	640.313	273.32	517.657	2.48791	1.31493	4.11818e-08	3.96339e-06
ENSG00000168078.9_3	PBK	chr8	27667137	27695612	-	protein_coding_gene	29.8652	19.0803	16.0252	24.047	48.3772	15.8919	64.846	27.2627	88.8786	85.3998	82.3442	104.929	59.514	101.478	205.536	158.513	57.8561	74.1098	77.069	39.9272	303.065	489.638	515.81	110.001	30.6744	159.629	25.6548	95.1782	5.20707	2.38047	4.12871e-08	3.96664e-06
ENSG00000144488.14_3	ESPNL	chr2	239008798	239041928	+	protein_coding_gene	30.631	25.7584	48.0757	29.0568	62.7874	11.6541	22.6446	26.1722	6.42496	9.98179	17.4981	3.27903	7.9352	16.5877	7.41624	6.17581	9.07546	8.23442	16.8918	6.65453	1.12246	16.3576	10.9051	5.61231	32.0975	9.38454	27.6145	8.08481	0.293016	-1.77095	4.14978e-08	3.97999e-06
ENSG00000266256.1_2	LINC00683	chr18	74327169	74337897	+	lncRNA	20.6759	45.7927	62.3204	44.0861	67.9339	44.4974	41.1721	61.0684	11.7791	29.9454	8.23442	15.3021	18.8461	7.80598	2.11893	8.23442	10.2099	26.7619	23.2263	16.6363	6.73477	14.1766	1.09051	6.73477	48.4434	12.9898	45.1451	10.9945	0.268571	-1.89662	4.2219e-08	4.04216e-06
ENSG00000206630.1	SNORD60	chr16	2205024	2205106	-	snoRNA	32.1626	18.1263	22.2573	14.0274	12.3516	40.2596	32.9377	18.5386	57.8246	55.4544	55.5823	51.3715	85.3034	98.5505	64.6272	90.5786	49.9151	38.0842	35.8951	47.6908	71.8376	34.8962	43.6203	62.8579	23.8326	59.0056	20.398	55.5184	2.47395	1.30681	4.27531e-08	4.08265e-06
ENSG00000212304.1	SNORD12	chr20	47897220	47897309	+	snoRNA	49.7754	24.8044	27.599	39.0763	32.9377	50.8542	44.26	29.4437	108.153	66.5453	137.926	53.5575	168.623	136.605	59.3299	96.7544	110.04	89.5493	99.2395	56.5635	76.3274	42.5298	76.3355	83.0622	37.3438	91.3214	36.007	86.3057	2.44595	1.2904	4.28629e-08	4.08265e-06
ENSG00000283663.1_3	AC008687.8	chr19	49559050	49568333	-	protein_coding_gene	114.866	179.355	190.522	111.217	104.989	184.347	154.395	82.8786	40.6914	23.2908	12.3516	43.7204	50.5869	43.9086	4.23785	7.20512	11.3443	62.7874	38.0066	41.0362	14.592	3.27152	5.45254	2.24492	140.321	25.2955	134.631	18.9414	0.180469	-2.47018	4.27899e-08	4.08265e-06
ENSG00000165794.9_3	SLC39A2	chr14	21467414	21470030	+	protein_coding_gene	160.813	41.9766	1544.65	53.1037	9.26372	536.088	171.893	1067.61	143.491	2.21818	1.0293	5.46505	98.1981	3.90299	1.05946	1.0293	5.67217	19.5567	3.16722	11.0909	5.61231	4.36203	14.1766	4.48985	448.175	20.2826	166.353	4.97745	0.045283	-4.46489	4.41199e-08	4.19517e-06
ENSG00000267441.1_3	AL353997.3	chr17	18292185	18292773	+	pseudogene	4.59465	8.58613	17.8058	3.00587	8.23442	8.4757	9.26372	4.36203	2.14165	1.10909	1.0293	1.09301	0.9919	0.975748	1.05946	1.0293	1.13443	2.0586	4.22296	3.32726	2.24492	1.09051	1.09051	1.12246	8.04104	1.60757	8.35506	1.10105	0.198623	-2.3319	4.44556e-08	4.21265e-06
ENSG00000258471.1_3	AL355922.2	chr14	21463996	21467322	-	as_lncRNA	35.9914	10.4942	154.02	10.0196	6.17581	55.0921	18.5274	114.503	14.9916	1.10909	1.0293	2.18602	23.8056	0.975748	1.05946	2.0586	3.4033	12.3516	1.05574	3.32726	2.24492	2.18102	3.27152	2.24492	50.603	4.83098	27.2594	2.21547	0.0958631	-3.38288	4.44482e-08	4.21265e-06
ENSG00000151418.11_3	ATP6V1G3	chr1	198492352	198510075	-	protein_coding_gene	35.2257	43.8846	43.6243	4.00783	2.0586	24.3677	9.26372	27.2627	10.7083	2.21818	3.08791	12.0231	2.9757	6.83023	1.05946	1.0293	2.26887	2.0586	1.05574	3.32726	1.12246	2.18102	2.18102	2.24492	23.7119	3.52325	25.8152	2.23155	0.148396	-2.75247	4.5216e-08	4.27739e-06
ENSG00000184524.5_3	CEND1	chr11	787104	790123	-	protein_coding_gene	18.3786	12.4022	44.5145	12.0235	43.2307	23.3082	28.8205	6.54305	9.63744	8.8727	8.23442	7.65107	6.9433	1.9515	2.11893	3.08791	2.26887	6.17581	3.16722	2.21818	4.48985	7.63355	14.1766	2.24492	23.6527	5.67952	20.8434	5.33283	0.239773	-2.06026	4.59909e-08	4.34328e-06
ENSG00000174562.13_3	KLK15	chr19	51328545	51340469	-	protein_coding_gene	30.631	42.9306	41.8437	64.1253	17.4981	34.9623	67.9339	223.554	177.757	371.544	406.574	107.115	208.299	1536.8	2029.93	784.328	125.922	116.311	103.462	92.0543	356.943	372.954	366.411	735.213	65.4349	493.226	42.3871	361.677	7.5449	2.9155	4.78856e-08	4.50913e-06
ENSG00000182782.7_3	HCAR2	chr12	123185840	123187890	-	protein_coding_gene	854.605	106.85	163.814	62.1213	28.8205	154.682	49.4065	647.762	70.6745	15.5272	20.586	38.2554	50.5869	22.4422	33.9028	67.9339	39.7052	34.9963	44.341	24.3999	38.1637	82.8786	2.18102	43.776	258.507	39.3969	130.766	38.2095	0.15236	-2.71445	4.79098e-08	4.50913e-06
ENSG00000173376.13_3	NDNF	chr4	121956768	121994176	-	protein_coding_gene	1689.3	1033.2	777.224	1358.65	2765.74	597.537	837.852	523.444	316.965	282.817	224.388	290.741	530.666	387.372	228.844	137.926	211.005	731.834	596.493	414.799	315.412	377.316	118.865	554.496	1197.87	357.496	935.525	316.188	0.298447	-1.74445	4.84362e-08	4.55095e-06
ENSG00000174358.15_3	SLC6A19	chr5	1201710	1225232	+	protein_coding_gene	7.65775	46.7467	77.4553	13.0254	18.5274	39.2001	26.7619	25.0817	18.204	13.3091	4.11721	5.46505	2.9757	2.92724	14.8325	2.0586	6.8066	6.17581	10.5574	3.32726	2.24492	3.27152	6.54305	4.48985	31.807	6.70661	25.9218	4.97745	0.210504	-2.24808	4.87035e-08	4.56833e-06
ENSG00000176900.2_4	OR51T1	chr11	4903049	4904113	+	protein_coding_gene	2.29733	14.3102	0.890291	18.0352	4.11721	5.29732	2.0586	1.09051	22.4874	24.3999	163.659	29.5113	159.696	11.709	85.8165	154.395	94.1579	33.967	124.577	6.65453	11.2246	16.3576	3.27152	80.8173	6.01209	63.9189	3.20727	31.7391	10.6509	3.4129	4.94946e-08	4.63468e-06
ENSG00000122304.10_3	PRM2	chr16	11369496	11370337	-	protein_coding_gene	0.765775	0.954014	0.890291	1.00196	1.0293	1.05946	1.0293	241.002	1.07083	1.10909	1.0293	1.09301	0.9919	0.975748	1.05946	1.0293	1.13443	1.0293	1.05574	1.10909	1.12246	1.09051	1.09051	1.12246	30.9665	1.06957	1.01563	1.08067	0.0345871	-4.85362	4.98623e-08	4.66125e-06
ENSG00000268948.1	AC004017.1	chr19	58203868	58204128	-	protein_coding_gene	4.59465	20.9883	19.5864	5.00979	13.3809	15.8919	11.3223	5.45254	3.21248	5.54544	1.0293	1.09301	5.9514	1.9515	1.05946	3.08791	4.53773	5.14651	3.16722	2.21818	1.12246	1.09051	2.18102	2.24492	12.0284	2.78994	12.3516	2.23155	0.232773	-2.103	5.20288e-08	4.85558e-06
ENSG00000021355.12_3	SERPINB1	chr6	2832566	2842240	-	protein_coding_gene	7591.89	908.221	908.097	825.613	758.596	886.771	1443.08	1600.87	904.848	524.598	256.296	478.739	678.459	539.588	232.022	510.534	349.405	482.743	417.017	611.107	518.577	364.23	281.351	162.757	1865.39	457.017	908.159	480.741	0.244972	-2.02931	5.36722e-08	5.00054e-06
ENSG00000185885.15_3	IFITM1	chr11	313506	315272	+	protein_coding_gene	1915.97	852.888	1291.81	1158.26	726.687	1054.17	2355.04	5465.62	616.796	330.508	238.798	491.855	959.167	738.641	276.52	424.073	386.842	495.094	542.65	737.543	497.251	394.764	697.925	88.6745	1852.56	494.819	1225.04	493.475	0.267126	-1.90441	5.40354e-08	5.02593e-06
ENSG00000007306.14_3	CEACAM7	chr19	42177235	42210895	-	protein_coding_gene	384.419	14.3102	5.34175	22.0431	13.3809	5.29732	13.3809	7.63355	9.63744	9.98179	6.17581	3.27903	1.9838	5.85449	5.29732	10.293	2.26887	4.11721	2.11148	7.76361	7.85723	5.45254	3.27152	5.61231	58.2259	5.68484	13.3809	5.53242	0.0972894	-3.36157	5.4327e-08	5.04458e-06
ENSG00000255240.5_4	AP001636.3	chr11	58701116	58826132	-	as_lncRNA	1966.51	3831.32	7464.2	5085.93	4370.42	4925.44	4236.61	4250.8	26524.4	23929.7	42306.4	31137.7	40749.2	25642.6	10433.6	12249.7	17514.5	31508	29577.6	5756.17	7670.91	4432.91	2279.16	10073	4516.4	20111.6	4310.61	20722.1	4.45304	2.15479	5.58568e-08	5.17796e-06
ENSG00000185823.3_3	NPAP1	chr15	24921015	24928540	+	protein_coding_gene	27.5679	23.8503	5.34175	8.01566	54.553	48.7353	2.0586	2.18102	2.14165	2.21818	3.08791	2.18602	4.9595	7.80598	2.11893	2.0586	2.26887	4.11721	1.05574	3.32726	6.73477	3.27152	1.09051	1.12246	21.5379	3.09782	15.933	2.24352	0.144522	-2.79063	5.62274e-08	5.20362e-06
ENSG00000233080.3_4	LINC01399	chr22	35515817	35627049	-	pseudogene	126.353	515.168	157.581	188.368	165.718	197.06	200.714	106.87	233.44	409.253	482.743	444.855	412.63	425.426	2003.44	805.944	808.851	510.534	732.683	482.453	539.904	748.088	1146.12	1132.56	207.229	707.434	177.043	525.219	3.41367	1.77132	5.68104e-08	5.24881e-06
ENSG00000105655.18_3	ISYNA1	chr19	18545198	18549111	-	protein_coding_gene	393.608	262.354	525.272	211.413	315.996	347.504	286.146	459.104	89.9494	104.254	83.3735	102.743	111.093	253.694	175.871	47.3479	76.007	183.216	156.249	129.763	222.247	78.5166	155.943	48.2659	350.175	126.158	331.75	107.674	0.360332	-1.4726	5.69445e-08	5.25244e-06
ENSG00000258274.1_3	AC012085.2	chr12	94101567	94131599	-	as_lncRNA	225.138	163.136	129.982	258.505	276.882	134.552	158.513	276.989	119.933	107.582	71.0219	49.1855	73.4006	51.7146	12.7136	28.8205	34.033	150.278	59.1214	46.5817	25.8166	41.4393	26.1722	49.3883	202.962	59.2001	194.137	49.2869	0.291828	-1.77681	5.72924e-08	5.27576e-06
ENSG00000278840.1_4	AC009878.1	chr15	26802745	26803084	-	lncRNA	5.36043	12.4022	8.90291	7.0137	6.17581	15.8919	9.26372	3.27152	36.4081	39.9272	22.6446	9.83709	50.5869	27.3209	14.8325	32.9377	17.0165	66.9046	28.505	11.0909	23.5717	28.3532	66.521	33.6739	8.53528	31.8832	7.9583	28.4291	3.74784	1.90606	5.75549e-08	5.29114e-06
ENSG00000255398.2_3	HCAR3	chr12	123199303	123201439	-	protein_coding_gene	1008.53	43.8846	30.2699	79.1546	10.293	77.3408	53.5237	105.779	70.6745	12.2	4.11721	15.3021	31.7408	17.5635	15.8919	34.9963	7.94103	5.14651	19.0033	12.2	13.4695	9.81457	1.09051	16.8369	176.096	17.9993	65.4323	14.3858	0.102178	-3.29084	5.77418e-08	5.29953e-06
ENSG00000024422.11_3	EHD2	chr19	48216600	48246391	+	protein_coding_gene	830.866	313.871	584.031	310.607	758.596	341.147	466.274	239.912	156.341	220.708	158.513	114.766	289.635	183.441	73.103	100.872	150.88	220.271	360.007	160.818	185.206	152.671	179.934	84.1847	480.663	174.459	403.711	159.665	0.362903	-1.46234	5.86688e-08	5.37571e-06
ENSG00000065183.15_3	WDR3	chr1	118472343	118509165	+	protein_coding_gene	1946.6	1885.13	2015.62	1909.73	1924.8	1577.54	1894.95	1331.51	2825.91	2177.14	4339.54	3119.45	3007.44	2580.85	3288.57	4284.99	3363.59	2979.83	2844.16	2854.79	1967.68	4290.06	2274.8	3471.78	1810.73	3104.41	1902.34	2993.64	1.71433	0.777649	5.95144e-08	5.43819e-06
ENSG00000224592.5_3	AL139158.2	chr1	38512986	38584697	+	lncRNA	140.903	119.252	64.9912	192.376	602.142	102.768	82.3442	41.4393	66.3912	42.1453	44.26	38.2554	59.514	54.6419	22.2487	24.7033	48.7806	62.7874	52.787	62.1089	34.7963	28.3532	33.8057	15.7145	168.277	43.2058	111.01	43.2027	0.2569	-1.96072	5.95469e-08	5.43819e-06
ENSG00000232815.1_2	DUX4L50	chr9	68413482	68414196	-	pseudogene	6.89198	6.6781	11.5738	9.01761	13.3809	4.23785	10.293	5.45254	1.07083	1.10909	2.0586	3.27903	3.9676	0.975748	2.11893	2.0586	1.13443	3.08791	3.16722	2.21818	1.12246	4.36203	1.09051	1.12246	8.44073	2.12148	7.95479	2.0586	0.252345	-1.98653	5.9659e-08	5.43947e-06
ENSG00000259087.5_3	AL121790.2	chr14	38025363	38036300	-	lncRNA	141.668	190.803	136.214	376.736	180.128	238.379	177.04	236.64	399.418	521.271	721.541	309.322	476.112	1347.51	771.289	1029.3	653.433	635.079	632.388	410.362	294.085	332.605	234.459	718.376	209.701	592.909	185.465	576.829	2.82885	1.50021	6.07832e-08	5.5238e-06
ENSG00000230795.3_2	HLA-K	chr6	29894236	29897009	+	pseudogene	114.866	180.309	80.1262	24.047	141.014	32.8434	77.1977	81.7881	13.9207	14.4181	18.5274	21.8602	52.5707	46.8359	7.41624	10.293	14.7476	20.586	25.3377	32.1635	12.3471	40.3488	34.8962	10.1022	91.5239	23.5232	80.9571	19.5567	0.257269	-1.95865	6.07509e-08	5.5238e-06
ENSG00000165323.15_3	FAT3	chr11	92085262	92629636	+	protein_coding_gene	5136.05	7978.42	10923	5680.09	10589.5	6969.15	5135.19	5377.29	2914.79	2516.52	1183.7	1288.66	3082.82	880.124	157.86	716.394	1216.11	4167.64	2316.29	1867.7	2030.53	742.636	334.786	1731.96	7223.58	1696.78	6324.62	1510.31	0.234896	-2.0899	6.22419e-08	5.6471e-06
ENSG00000130032.15_3	PRRG3	chrX	150863596	150874396	+	protein_coding_gene	19.9102	21.9423	40.0631	56.1096	26.7619	44.4974	17.4981	11.9956	11.7791	1.10909	6.17581	15.3021	23.8056	6.83023	7.41624	4.11721	3.4033	7.20512	8.44591	4.43635	7.85723	2.18102	5.45254	5.61231	29.8473	7.57057	24.3521	6.50302	0.254847	-1.9723	6.25383e-08	5.66473e-06
ENSG00000197616.11_3	MYH6	chr14	23851199	23877486	-	protein_coding_gene	26.0364	20.9883	133.544	18.0352	12.3516	19.0703	27.7912	4.36203	8.56661	13.3091	6.17581	3.27903	5.9514	0.975748	2.11893	3.08791	5.67217	4.11721	6.33443	6.65453	1.12246	3.27152	2.18102	13.4695	32.7723	5.39296	20.0293	4.89469	0.163632	-2.61147	6.2896e-08	5.68783e-06
ENSG00000237372.2_2	UNQ6494	chr9	92254729	92334674	+	lncRNA	45.1807	33.3905	42.734	37.0724	64.846	32.8434	50.4358	77.426	127.428	106.472	187.333	115.859	97.2062	307.361	176.93	161.6	81.6792	84.4028	106.63	83.1816	60.613	209.377	370.773	87.552	47.9911	147.775	43.9573	111.244	3.08305	1.62436	6.51583e-08	5.88282e-06
ENSG00000242670.1_2	RPL22P13	chr4	55087293	55087639	+	pseudogene	96.4877	143.102	140.666	174.341	60.7288	148.325	153.366	152.671	1634.08	942.725	502.299	407.693	134.898	336.633	217.19	946.958	358.481	165.718	187.922	423.671	453.475	738.274	259.541	878.888	133.711	536.778	145.713	415.682	4.01498	2.00539	6.57409e-08	5.92577e-06
ENSG00000187634.11_4	SAMD11	chr1	859308	879961	+	protein_coding_gene	480.907	222.285	1935.49	228.446	260.413	541.386	483.772	806.976	194.89	103.145	98.813	123.51	212.267	78.0598	43.438	75.1391	189.45	186.304	120.354	163.036	194.186	215.921	319.519	32.5514	619.96	146.911	482.339	143.273	0.236934	-2.07744	6.64686e-08	5.98163e-06
ENSG00000226074.4_2	PRSS44	chr3	46850849	46854048	-	pseudogene	35.9914	19.0803	50.7466	33.0646	31.9084	32.8434	34.9963	28.3532	8.56661	3.32726	7.20512	12.0231	26.7813	9.75748	1.05946	9.26372	5.67217	22.6446	9.50165	11.0909	5.61231	4.36203	3.27152	2.24492	33.373	8.89901	32.954	7.88586	0.268032	-1.89952	6.66316e-08	5.98658e-06
ENSG00000162783.10_3	IER5	chr1	181057848	181062035	+	protein_coding_gene	1776.6	233.733	365.019	359.703	361.285	323.136	431.278	390.402	270.919	178.563	169.835	132.254	198.38	198.077	154.682	214.095	165.627	223.359	171.03	202.963	138.063	195.201	124.318	61.7354	530.144	174.944	363.152	174.796	0.329847	-1.60013	6.70173e-08	6.01149e-06
ENSG00000242828.1_3	AC068756.1	chr3	80810193	80838114	-	lncRNA	19.1444	4.77007	8.90291	10.0196	4.11721	10.5946	4.11721	10.9051	349.089	11.0909	219.241	773.851	62.4897	33.1754	29.665	3.08791	4.53773	6.17581	24.282	53.2362	435.515	9.81457	435.113	20.2043	9.07138	154.411	9.46124	31.4202	16.9827	4.08599	6.78115e-08	6.06311e-06
ENSG00000149243.15_3	KLHL35	chr11	75133438	75141674	-	protein_coding_gene	7.65775	8.58613	15.1349	10.0196	8.23442	23.3082	17.4981	6.54305	33.1956	25.509	33.967	65.5806	32.7327	87.8173	12.7136	34.9963	70.3349	24.7033	17.9476	72.0907	39.2862	42.5298	93.7837	25.8166	12.1228	44.5628	9.30285	34.4816	3.68607	1.88208	6.77439e-08	6.06311e-06
ENSG00000120055.7_3	C10orf95	chr10	104209594	104211300	-	protein_coding_gene	9.1893	4.77007	8.01262	8.01566	3.08791	10.5946	8.23442	15.2671	23.5582	12.2	26.7619	17.4882	18.8461	39.0299	14.8325	29.8498	21.5542	18.5274	23.2263	15.5272	15.7145	37.0773	25.0817	30.3065	8.39646	23.0988	8.12504	22.3902	2.76808	1.46889	6.84629e-08	6.1115e-06
ENSG00000182648.11_2	LINC01006	chr7	156264890	156433348	-	lncRNA	457.934	1901.35	1338.11	917.793	2108.01	2062.77	1209.43	403.488	6012.69	7723.69	10007.9	4184.04	15435	6155.99	4057.74	2961.3	4604.66	2398.27	5423.33	5583.15	3530.14	2450.37	1158.12	2204.52	1299.86	5243.18	1273.77	4394.35	4.03381	2.01214	7.07135e-08	6.30225e-06
ENSG00000131747.14_3	TOP2A	chr17	38544768	38574202	-	protein_coding_gene	131.713	144.056	95.2611	388.759	532.149	139.849	514.651	139.585	487.226	402.599	537.296	733.41	608.035	1637.3	2483.38	1961.85	888.261	965.485	615.496	517.944	1721.86	2621.58	3376.21	491.638	260.753	1253.1	141.953	810.836	4.8067	2.26505	7.2145e-08	6.41071e-06
ENSG00000027644.4_3	INSRR	chr1	156809855	156828810	-	protein_coding_gene	21.4417	15.2642	2.67087	18.0352	24.7033	30.7244	23.674	4.36203	6.42496	7.76361	4.11721	4.37204	4.9595	5.85449	2.11893	2.0586	1.13443	8.23442	6.33443	3.32726	4.48985	2.18102	3.27152	3.36739	17.6095	4.3756	19.7385	4.24463	0.24956	-2.00254	7.21616e-08	6.41071e-06
ENSG00000201980.1	SNORA62	chr11	4777875	4778027	+	snoRNA	0.765775	3.81606	0.890291	6.01174	2.0586	1.05946	1.0293	2.18102	10.7083	4.43635	57.6409	21.8602	24.7975	16.5877	36.0217	54.553	27.2264	12.3516	21.1148	3.32726	4.48985	1.09051	3.27152	120.103	2.22653	26.2238	1.55903	18.8512	11.8593	3.56795	7.25431e-08	6.43428e-06
ENSG00000152503.9_3	TRIM36	chr5	114460459	114516243	-	protein_coding_gene	1412.86	4545.88	3470.35	2294.48	1951.56	2639.12	1320.59	1744.81	5815.66	2618.56	7864.9	5073.75	5788.73	5099.26	9550	9489.14	6721.52	5661.16	12082.9	4411.95	3535.76	5535.42	4145.02	9361.33	2422.46	6422.19	2123.02	5724.94	2.65109	1.40659	7.28103e-08	6.44767e-06
ENSG00000108395.13_4	TRIM37	chr17	57059999	57184282	-	protein_coding_gene	2603.64	3547.02	3280.72	4229.26	3405.96	3659.39	2911.9	2961.82	4410.73	3636.7	4906.68	5798.42	5211.44	4470.88	5508.15	5574.7	5086.8	3709.61	4477.39	5277.04	4545.97	5236.62	5913.82	4859.14	3324.96	4914.01	3343.34	4996.74	1.47799	0.563639	7.2982e-08	6.45257e-06
ENSG00000164434.11_3	FABP7	chr6	123100620	123105219	+	protein_coding_gene	64.3251	9.54014	7.12233	9.01761	11.3223	16.9514	10.293	4.36203	3.21248	5.54544	5.14651	5.46505	1.9838	4.87874	1.05946	3.08791	2.26887	2.0586	3.16722	4.43635	3.36739	2.18102	2.18102	2.24492	16.6167	3.2678	9.91658	3.12756	0.194227	-2.36419	7.5892e-08	6.69916e-06
ENSG00000065989.15_3	PDE4A	chr19	10527449	10580307	+	protein_coding_gene	554.421	299.56	239.488	258.505	353.051	224.606	264.531	146.128	92.0911	80.9634	101.901	128.975	162.672	161.974	51.9137	91.6079	48.7806	167.776	156.249	68.7634	69.5926	71.9735	174.481	41.5311	292.536	104.453	261.518	91.8495	0.357087	-1.48565	7.62079e-08	6.70806e-06
ENSG00000142156.14_3	COL6A1	chr21	47401651	47424964	+	protein_coding_gene	4797.58	2017.74	2372.63	2499.88	4848.01	2302.21	2075.07	1732.82	823.465	1019.25	1331.92	605.528	1212.1	590.327	412.131	524.944	789.565	1503.81	2383.86	677.653	991.134	1083.96	1029.44	385.004	2830.74	960.256	2337.42	907.3	0.33922	-1.55971	7.62348e-08	6.70806e-06
ENSG00000281406.1_3	BLACAT1	chr1	205404014	205407007	-	lncRNA	5.36043	11.4482	17.8058	2.00391	6.17581	8.4757	13.3809	15.2671	3.21248	1.10909	1.0293	2.18602	3.9676	1.9515	1.05946	3.08791	2.26887	5.14651	1.05574	3.32726	3.36739	1.09051	1.09051	1.12246	9.98973	2.25454	9.96194	2.06876	0.227247	-2.13766	7.64517e-08	6.71648e-06
ENSG00000275465.5_3	AL449403.2	chr9	98868943	98878693	-	lncRNA	60.4962	164.09	124.641	302.591	513.622	51.9137	116.311	59.9779	24.629	17.7454	16.4688	25.1392	29.757	8.78173	2.11893	7.20512	3.4033	116.311	13.7246	17.7454	5.61231	2.18102	2.18102	1.12246	174.205	18.3829	120.476	11.2532	0.105662	-3.24247	7.76072e-08	6.8072e-06
ENSG00000184307.14_3	ZDHHC23	chr3	113666748	113684248	+	protein_coding_gene	385.185	618.201	713.123	525.025	428.19	632.499	683.457	400.216	1075.11	707.598	1429.7	1140.01	1398.58	991.36	1815.92	1004.6	1150.32	868.731	1250	552.326	1242.57	2818.96	1122.13	1715.12	548.237	1267.69	571.613	1145.16	2.31235	1.20936	7.77815e-08	6.81172e-06
ENSG00000279712.1_3	FP325330.3	chr22	48312477	48322013	+	lncRNA	4.59465	9.54014	3.56116	1.00196	1.0293	1.05946	2.0586	4.36203	44.9747	51.018	118.37	43.7204	172.591	133.677	1.05946	2.0586	127.057	2.0586	2.11148	70.9816	46.0209	1.09051	44.7108	8.9797	3.40091	54.4049	2.80988	44.8428	15.9149	3.99231	7.81131e-08	6.82997e-06
ENSG00000176925.7_4	OR51F2	chr11	4842551	4843686	+	protein_coding_gene	2.29733	15.2642	0.890291	12.0235	4.11721	9.53517	3.08791	1.09051	23.5582	18.8545	187.333	22.9532	160.688	15.612	86.876	149.249	46.5118	29.8498	128.8	14.4181	13.4695	6.54305	2.18102	90.9194	6.03826	62.3635	3.60256	26.704	10.3548	3.37223	8.04919e-08	7.02688e-06
ENSG00000188732.10_3	FAM221A	chr7	23719749	23742868	+	protein_coding_gene	356.851	1203.01	798.591	696.36	699.926	1224.74	611.406	555.068	1147.93	1354.2	2399.3	2045.02	1788.4	1763.18	2293.74	1984.49	1488.38	1516.16	1916.17	968.234	1236.95	1858.23	1031.62	2495.23	768.244	1705.45	698.143	1775.79	2.22027	1.15073	8.10079e-08	7.0608e-06
ENSG00000275832.4_3	ARHGAP23	chr17	36575523	36668628	+	protein_coding_gene	2112.01	508.489	845.776	374.732	868.731	510.661	475.538	358.777	235.582	247.327	277.912	135.533	441.395	185.392	80.5192	206.89	138.401	361.285	327.279	159.709	176.227	157.033	98.1457	43.776	756.839	204.525	509.575	180.809	0.270224	-1.88777	8.13382e-08	7.07847e-06
ENSG00000167779.7_3	IGFBP6	chr12	53491220	53496129	+	protein_coding_gene	866.092	762.257	770.102	634.239	502.299	640.975	662.871	1039.25	342.664	146.4	314.966	144.277	178.542	381.517	120.779	91.6079	213.273	182.186	462.414	154.163	553.374	391.492	123.227	231.227	734.761	252.007	712.564	197.73	0.342968	-1.54385	8.24578e-08	7.16465e-06
ENSG00000128594.7_3	LRRC4	chr7	127667124	127672160	-	protein_coding_gene	100.317	31.4825	438.023	27.0528	18.5274	101.708	78.227	29.4437	17.1332	12.2	20.586	26.2322	22.8137	38.0542	6.35678	8.23442	14.7476	25.7326	22.1705	8.8727	13.4695	39.2583	14.1766	5.61231	103.098	18.4782	54.8547	15.9404	0.17925	-2.47995	8.356e-08	7.24906e-06
ENSG00000188536.12_3	HBA2	chr16	222846	223709	+	protein_coding_gene	923.525	40.0686	17.8058	52.1018	22.6446	72.0435	90.5786	86.1501	28.9123	60.9998	31.9084	38.2554	7.9352	18.5392	5.29732	9.26372	20.4198	13.3809	14.7803	24.3999	24.6942	10.9051	21.8102	6.73477	163.115	21.1398	62.0726	19.4795	0.12939	-2.95021	8.36914e-08	7.24912e-06
ENSG00000129048.6_3	ACKR4	chr3	132316081	132337811	+	protein_coding_gene	42.1176	23.8503	25.8184	26.0509	23.674	20.1298	20.586	53.4349	10.7083	16.6363	10.293	8.74408	7.9352	13.6605	10.5946	16.4688	14.7476	15.4395	10.5574	6.65453	6.73477	6.54305	20.7196	3.36739	29.4577	11.2378	24.8344	10.576	0.381592	-1.3899	8.39487e-08	7.26006e-06
ENSG00000224271.5_3	AL117329.1	chr22	48027423	48251349	+	lncRNA	139.371	652.546	315.163	41.0802	42.2014	157.86	137.926	49.0728	3856.05	4678.13	7653.89	4357.83	11702.4	7185.41	8.4757	60.7288	7584.82	61.7581	64.4001	4924.35	4281.07	13.0861	3894.2	283.983	191.903	3788.16	138.649	4087.64	19.7383	4.30293	8.5792e-08	7.40791e-06
ENSG00000198580.7_3	AC073343.1	chr7	6713125	6715997	+	pseudogene	95.7219	149.78	144.227	167.327	209.978	193.882	125.575	133.042	83.5244	76.5271	77.1977	66.6736	84.3115	64.3993	29.665	38.0842	53.3184	98.813	61.2329	83.1816	48.2659	54.5254	15.2671	24.6942	152.442	59.9801	147.004	62.8161	0.393904	-1.34408	8.98165e-08	7.74336e-06
ENSG00000151364.16_3	KCTD14	chr11	77726761	77757237	-	protein_coding_gene	224.372	364.433	178.948	633.237	255.267	212.952	326.289	343.51	124.216	67.6543	256.296	54.6505	88.2791	94.6475	96.4111	48.3772	24.9575	109.106	139.358	52.1271	26.9391	112.322	51.2539	22.4492	317.376	85.5653	290.778	77.9667	0.269785	-1.89012	9.35083e-08	8.04912e-06
ENSG00000280032.1_3	AP002800.1	chr11	118135308	118137532	+	protein_coding_gene	1102.72	205.113	205.657	181.354	200.714	281.817	215.124	139.585	205.599	25.509	39.1135	100.557	83.3196	28.2967	19.0703	42.2014	48.7806	80.2856	31.6722	69.8725	20.2043	26.1722	5.45254	5.61231	316.51	51.9824	205.385	35.3928	0.1642	-2.60647	9.47147e-08	8.14033e-06
ENSG00000237523.1_2	LINC00857	chr10	81967466	81979413	+	lncRNA	75.046	58.1949	87.2485	27.0528	47.3479	46.6164	46.3186	69.7925	23.5582	21.0727	16.4688	26.2322	23.8056	33.1754	4.23785	13.3809	19.2854	30.8791	22.1705	28.8363	22.4492	18.5386	6.54305	4.48985	57.2022	19.6952	52.7714	21.6216	0.344259	-1.53844	9.51075e-08	8.16143e-06
ENSG00000260760.1_2	PWRN3	chr15	24686274	24693114	+	lncRNA	120.227	235.641	32.0505	53.1037	171.893	277.579	9.26372	11.9956	10.7083	2.21818	2.0586	2.18602	26.7813	60.4964	2.11893	6.17581	10.2099	4.11721	1.05574	3.32726	20.2043	8.72406	3.27152	1.12246	113.969	10.2985	86.6652	3.72224	0.0906416	-3.46368	9.66455e-08	8.28059e-06
ENSG00000231991.4_2	ANXA2P2	chr9	33624272	33625291	+	pseudogene	19653.6	10215.6	11282.7	14755.8	8929.2	8456.63	9368.71	28022.8	5905.61	3125.41	2787.35	3077.92	3623.41	5816.43	7165.15	5481.03	2829.28	4767.73	4936.64	3753.15	10543.3	6971.62	4488.53	1414.3	13835.6	4792.93	10749.1	4628.13	0.34642	-1.52941	9.84581e-08	8.42288e-06
ENSG00000158528.11_3	PPP1R9A	chr7	94536514	94925727	+	protein_coding_gene	2318	9124.19	11242.6	8475.55	5738.36	11069.3	5711.6	4718.63	12233.1	9009.12	21521.7	20617.5	29224.3	11020.1	24600.7	39432.6	27470.3	21368.3	21491.7	11187.4	12357.2	14355.4	30444.8	22071	7299.77	20525.3	7106.96	21430	2.8118	1.49149	9.90806e-08	8.46307e-06
ENSG00000240771.6_3	ARHGEF25	chr12	58003963	58013162	+	protein_coding_gene	691.495	704.062	1163.61	649.268	1240.31	820.024	962.398	611.775	383.356	423.671	375.695	218.602	557.448	310.288	223.547	187.333	314.238	529.061	514.145	295.017	483.781	271.536	273.717	87.552	855.368	340.562	762.043	312.263	0.398187	-1.32848	1.01805e-07	8.68241e-06
ENSG00000249375.7_2	CASC11	chr8	128698588	128746213	-	lncRNA	35.9914	28.6204	21.367	30.0587	32.9377	30.7244	26.7619	17.4481	97.4452	62.1089	93.6665	34.9763	83.3196	49.7631	85.8165	132.78	165.627	39.1135	63.3443	53.2362	25.8166	64.34	83.9691	110.001	27.9887	77.8328	29.3396	73.8298	2.7763	1.47316	1.07091e-07	9.11915e-06
ENSG00000106305.9_3	AIMP2	chr7	6048876	6063465	+	protein_coding_gene	500.051	633.465	772.772	580.133	383.93	521.256	827.559	644.49	1424.2	909.452	1135.32	1101.75	798.479	1435.32	2241.82	2239.76	1064.1	626.845	957.555	1212.23	1295.32	2248.63	2097.05	1425.53	607.957	1388.34	606.799	1253.78	2.28362	1.19132	1.09138e-07	9.27921e-06
ENSG00000171234.13_3	UGT2B7	chr4	69917081	69978705	+	protein_coding_gene	94.1903	63.9189	39.1728	6.01174	7.20512	10.5946	16.4688	332.605	16.0624	21.0727	5.14651	2.18602	8.9271	13.6605	1.05946	5.14651	5.67217	19.5567	6.33443	6.65453	8.9797	2.18102	9.81457	5.61231	71.2709	8.62916	27.8208	6.49448	0.121211	-3.04441	1.10128e-07	9.34908e-06
ENSG00000010704.18_4	HFE	chr6	26087509	26098571	+	protein_coding_gene	446.447	760.349	781.675	751.468	668.017	735.267	700.955	450.38	316.965	184.109	134.839	273.253	259.878	195.15	453.45	73.0805	116.847	322.172	418.073	145.29	138.063	104.689	75.245	60.613	661.82	204.482	718.111	164.7	0.309026	-1.6942	1.11451e-07	9.44691e-06
ENSG00000172794.19_4	RAB37	chr17	72666717	72743474	+	protein_coding_gene	196.038	157.412	107.725	239.468	168.806	117.6	223.359	63.2494	58.8954	92.0543	56.6116	56.8365	55.5464	107.332	87.9354	53.5237	40.8396	78.227	53.8427	98.7088	94.2868	63.2494	76.3355	39.2862	159.207	69.5945	163.109	61.0724	0.437017	-1.19424	1.13046e-07	9.56746e-06
ENSG00000125257.13_3	ABCC4	chr13	95672083	95953700	-	protein_coding_gene	22043.6	72508.9	29474.9	77035.5	49820.3	40759.7	24139.2	25003.2	91092	86800.5	192791	120584	161561	91277.3	140685	310024	293487	181353	225614	33703	69919.3	199071	47348.8	151445	42598.1	149797	35117.3	146065	3.51652	1.81415	1.14316e-07	9.65401e-06
ENSG00000092096.16_3	SLC22A17	chr14	23815515	23822121	-	protein_coding_gene	1087.4	1320.36	1169.84	1328.6	791.533	1003.31	1017.98	1194.11	358.727	164.145	242.915	232.811	497.934	362.002	228.844	119.399	209.87	525.973	1093.75	227.363	239.084	360.958	213.74	683.579	1114.14	360.068	1128.62	241	0.323197	-1.62951	1.14417e-07	9.65401e-06
ENSG00000181562.4_3	EDDM3A	chr14	21214051	21216539	+	protein_coding_gene	5.36043	1.90803	1.78058	1.00196	1.0293	2.11893	1.0293	187.567	2.14165	1.10909	1.0293	1.09301	1.9838	1.9515	1.05946	1.0293	1.13443	1.0293	1.05574	2.21818	1.12246	1.09051	1.09051	1.12246	25.2245	1.32879	1.8443	1.10105	0.0529097	-4.24033	1.15248e-07	9.70934e-06
ENSG00000253304.1_3	TMEM200B	chr1	29445940	29450447	-	protein_coding_gene	421.942	364.433	1174.29	462.904	822.412	636.737	663.9	637.947	197.032	211.836	162.63	125.696	321.376	142.459	79.4597	62.7874	123.653	255.267	474.027	134.2	351.331	249.726	56.7064	84.1847	648.071	189.523	637.342	152.544	0.292464	-1.77367	1.15813e-07	9.74215e-06
ENSG00000112984.11_3	KIF20A	chr5	137514408	137523404	+	protein_coding_gene	13.0182	15.2642	10.6835	29.0568	34.9963	12.7136	68.9632	22.9007	47.1164	37.709	71.0219	56.8365	74.3925	155.144	383.526	244.974	82.8136	101.901	70.7345	34.3817	193.063	333.695	341.329	41.5311	25.9495	141.886	19.0824	78.6031	5.47832	2.45373	1.19296e-07	1.002e-05
ENSG00000196754.10_3	S100A2	chr1	153533584	153540366	-	protein_coding_gene	5022.72	192.711	322.285	113.221	80.2856	283.936	198.655	424.208	276.273	67.6543	12.3516	83.0688	59.514	71.2296	19.0703	85.4321	94.1579	64.846	31.6722	177.454	151.532	44.7108	7.63355	5.61231	829.753	78.2633	241.296	66.2502	0.0942971	-3.40664	1.20496e-07	1.01054e-05
ENSG00000186081.11_3	KRT5	chr12	52908359	52914471	-	protein_coding_gene	7131.66	2918.33	3882.56	1797.51	3557.27	3091.51	1583.07	1022.9	1080.46	258.417	209.978	684.224	1336.09	400.057	59.3299	121.458	377.766	1010.77	842.48	388.181	218.88	278.079	25.0817	33.6739	3123.1	457.808	3004.92	327.923	0.146592	-2.77012	1.22347e-07	1.02452e-05
ENSG00000175084.11_3	DES	chr2	220283099	220291461	+	protein_coding_gene	31452.7	23730.1	41128.8	20736.5	33399.8	27815.1	31754	23477.5	13085.5	10215.8	6053.33	4502.11	11683.6	5504.19	796.716	2703.98	4733.99	10345.5	16418.9	4675.91	15449.6	9633.55	2717.55	3311.26	29186.8	7614.46	29633.9	5778.76	0.260887	-1.9385	1.23002e-07	1.02845e-05
ENSG00000243406.6_2	MRPS31P5	chr13	52741844	52768600	-	pseudogene	293.292	969.278	869.814	730.427	877.995	762.813	606.259	408.94	918.769	2388.97	3032.32	2248.32	2347.83	7803.05	1939.88	2400.33	2387.98	1459.55	4841.62	988.197	1387.36	1074.15	1276.98	1477.16	689.852	2373.28	746.62	2094.1	3.4405	1.78262	1.24592e-07	1.04017e-05
ENSG00000235098.8_3	ANKRD65	chr1	1353800	1357149	-	protein_coding_gene	316.265	333.905	573.347	241.472	111.165	296.65	272.765	268.265	143.491	109.8	85.4321	86.3478	136.882	150.265	46.6164	24.7033	58.9905	125.575	118.243	63.218	103.267	112.322	11.9956	42.6536	301.729	88.7376	284.707	94.8072	0.294139	-1.76543	1.25272e-07	1.04428e-05
ENSG00000017483.14_3	SLC38A5	chrX	48316920	48328644	-	protein_coding_gene	102.614	44.8387	36.5019	68.1331	109.106	34.9623	68.9632	44.7108	19.2749	24.3999	9.26372	20.7672	31.7408	27.3209	20.1298	13.3809	7.94103	27.7912	42.2296	15.5272	13.4695	42.5298	9.81457	12.3471	63.7287	21.1205	56.4859	19.7023	0.33158	-1.59257	1.26889e-07	1.05502e-05
ENSG00000282556.1_3	AC068733.3	chr11	6344784	6345253	+	lncRNA	32.1626	40.0686	47.1854	18.0352	68.9632	34.9623	32.9377	21.8102	21.4165	21.0727	9.26372	6.55806	12.8947	12.6847	2.11893	4.11721	10.2099	19.5567	5.2787	17.7454	14.592	6.54305	3.27152	4.48985	37.0156	10.7384	33.95	9.73681	0.290038	-1.78568	1.26941e-07	1.05502e-05
ENSG00000108370.16_3	RGS9	chr17	63096930	63223821	+	protein_coding_gene	340.77	347.261	517.259	269.526	428.19	355.98	298.498	380.587	128.499	178.563	142.044	107.115	147.793	250.767	304.066	106.018	61.2594	160.571	138.302	144.181	188.574	209.377	127.589	51.6333	367.259	152.897	351.62	143.113	0.416424	-1.26388	1.27689e-07	1.05965e-05
ENSG00000135318.11_3	NT5E	chr6	86159302	86205509	+	protein_coding_gene	1415.15	1045.6	1842.9	1399.73	1759.08	1415.44	1505.87	2083.96	930.548	724.234	623.757	507.157	857.993	375.663	105.946	285.117	586.502	739.039	849.87	525.708	876.643	480.914	387.13	259.289	1558.47	569.719	1460.66	556.105	0.365572	-1.45177	1.2866e-07	1.06477e-05
ENSG00000109113.19_4	RAB34	chr17	27041299	27045447	-	protein_coding_gene	1242.85	1206.83	1614.1	1097.14	1043.71	1310.56	1559.39	1529.98	789.199	487.999	395.252	560.714	471.152	731.811	132.433	202.773	287.012	447.746	595.437	541.235	840.724	462.375	169.029	136.94	1325.57	453.239	1276.7	466.764	0.34193	-1.54823	1.28723e-07	1.06477e-05
ENSG00000216083.1	MIR936	chr10	105807847	105807944	-	miRNA	33.6941	16.2182	31.1602	10.0196	36.0256	23.3082	17.4981	9.81457	6.42496	1.10909	2.0586	3.27903	2.9757	6.83023	2.11893	1.0293	1.13443	9.26372	21.1148	3.32726	2.24492	1.09051	2.18102	1.12246	22.2173	4.20656	20.4032	2.21297	0.189984	-2.39605	1.28883e-07	1.06477e-05
ENSG00000225194.2_2	LINC00092	chr9	98782014	98790247	-	lncRNA	35.9914	27.6664	201.206	29.0568	53.5237	55.0921	57.6409	106.87	36.4081	18.8545	18.5274	13.1161	16.8623	14.6362	2.11893	2.0586	5.67217	14.4102	26.3935	28.8363	11.2246	21.8102	9.81457	4.48985	70.8809	15.3271	54.3079	14.5232	0.216247	-2.20925	1.31112e-07	1.08157e-05
ENSG00000163584.17_3	RPL22L1	chr3	170582664	170588272	-	protein_coding_gene	912.038	1169.62	1163.61	1296.53	483.772	1113.5	1197.08	1119.95	12688.2	6498.14	3837.24	2818.87	1208.13	2596.46	1536.22	6623.56	2603.52	1581.01	1332.34	2862.56	3049.73	5440.54	1892.03	6137.62	1057.01	3919.14	1141.78	2840.71	3.70775	1.89054	1.31776e-07	1.08544e-05
ENSG00000161958.10_3	FGF11	chr17	7341592	7348256	+	protein_coding_gene	41.3519	32.4365	28.4893	25.0489	50.4358	46.6164	72.0512	43.6203	8.56661	9.98179	9.26372	10.9301	10.9109	12.6847	47.6758	13.3809	11.3443	20.586	13.7246	17.7454	16.8369	8.72406	19.6291	8.9797	42.5063	15.0603	42.4861	12.0145	0.354937	-1.49436	1.32718e-07	1.09158e-05
ENSG00000265009.1	AC078864.1	chr12	52504418	52504488	-	miRNA	24.5048	40.0686	36.5019	30.0587	42.2014	31.7839	23.674	55.6159	97.4452	69.8725	187.333	149.742	186.477	91.7203	148.325	109.106	113.443	50.4358	157.305	58.7816	127.961	82.8786	28.3532	35.9188	35.5511	105.944	34.1429	103.276	2.98577	1.57811	1.33673e-07	1.0978e-05
ENSG00000171811.13_4	CFAP46	chr10	134621896	134756327	-	protein_coding_gene	65.8567	36.2525	28.4893	67.1311	79.2563	31.7839	37.0549	62.1589	23.5582	24.3999	16.4688	24.0462	22.8137	21.4664	11.6541	16.4688	20.4198	42.2014	28.505	13.3091	14.592	25.0817	25.0817	21.3268	50.998	21.9621	49.6069	22.1401	0.430974	-1.21433	1.34269e-07	1.10106e-05
ENSG00000270141.3_2	TERC	chr3	169482308	169482848	-	lncRNA	2023.94	2131.27	3003.84	2715.3	520.827	3139.19	3198.04	2035.98	16218.7	8330.36	6009.07	6375.53	1904.45	10265.8	4830.09	9372.83	6055.6	4520.7	2901.17	6108.86	8793.37	10208.2	5203.9	8187.24	2346.05	7205.37	2423.29	6242.19	3.07128	1.61884	1.35426e-07	1.10891e-05
ENSG00000162520.14_3	SYNC	chr1	33145961	33169197	-	protein_coding_gene	676.945	657.316	953.501	647.264	928.431	594.359	694.779	736.093	320.177	258.417	244.974	236.09	308.481	515.195	173.752	186.304	181.509	263.501	369.509	242.89	773.376	332.605	415.483	222.247	736.086	315.282	685.862	260.959	0.428317	-1.22325	1.36414e-07	1.11317e-05
ENSG00000183439.7_3	TRIM61	chr4	165875598	165898820	-	protein_coding_gene	67.3882	75.3671	118.409	102.2	104.989	72.0435	98.813	158.124	37.4789	44.3635	31.9084	19.6742	84.3115	76.1083	11.6541	21.6153	43.1085	41.1721	29.5607	36.5999	37.0412	21.8102	23.9912	24.6942	99.6666	36.5683	100.506	34.2541	0.367783	-1.44307	1.36549e-07	1.11317e-05
ENSG00000107317.12_3	PTGDS	chr9	139869544	139876194	+	protein_coding_gene	3910.81	691.66	1748.53	2730.33	4327.19	1333.86	2431.21	3460.18	736.728	346.035	1003.57	338.833	1191.27	322.972	109.125	376.725	287.012	954.163	477.194	596.689	189.696	822.243	105.779	24.6942	2579.22	492.671	2580.77	361.38	0.191027	-2.38815	1.36341e-07	1.11317e-05
ENSG00000122756.14_3	CNTFR	chr9	34551430	34590138	-	protein_coding_gene	176.128	73.4591	69.4427	128.251	295.41	77.3408	48.3772	28.3532	24.629	18.8545	39.1135	22.9532	31.7408	11.709	7.41624	7.20512	22.6887	81.3149	35.8951	13.3091	6.73477	37.0773	16.3576	14.592	112.095	24.4744	75.3999	20.7716	0.218443	-2.19467	1.3692e-07	1.11456e-05
ENSG00000157554.18_3	ERG	chr21	39751949	40033704	-	protein_coding_gene	2701.65	900.589	563.554	696.36	2070.96	865.581	746.244	949.832	29029	6471.53	42884.8	42978.3	111262	55292.7	219.309	922.255	787.297	1863.04	571.155	35595.1	34595.4	384.949	767.717	310.922	1186.85	22746	883.085	4167.28	19.1648	4.26039	1.37935e-07	1.12118e-05
ENSG00000165309.13_3	ARMC3	chr10	23216953	23327452	+	protein_coding_gene	64.3251	72.5051	16.0252	71.139	20.586	15.8919	34.9963	21.8102	209.882	28.8363	416.867	72.1387	200.364	171.732	371.872	679.339	158.821	192.48	33.7837	108.691	227.86	66.521	125.408	211.023	39.6598	204.726	28.4032	182.106	5.15615	2.3663	1.38681e-07	1.12508e-05
ENSG00000214514.7_2	KRT42P	chr17	39782579	39796451	-	pseudogene	27.5679	9.54014	24.0379	32.0626	7.20512	23.3082	17.4981	6.54305	7.49578	7.76361	3.08791	8.74408	3.9676	4.87874	2.11893	2.0586	1.13443	10.293	5.2787	5.54544	7.85723	1.09051	1.09051	2.24492	18.4704	4.66563	20.4032	4.42317	0.251679	-1.99034	1.38821e-07	1.12508e-05
ENSG00000180264.11_3	ADGRD2	chr9	127213704	127240868	+	protein_coding_gene	45.9465	27.6664	14.2447	49.0959	19.5567	20.1298	17.4981	29.4437	8.56661	5.54544	9.26372	2.18602	9.919	5.85449	1.05946	5.14651	3.4033	19.5567	17.9476	8.8727	5.61231	1.09051	4.36203	2.24492	27.9477	6.91446	23.8981	5.57887	0.248089	-2.01107	1.39307e-07	1.12737e-05
ENSG00000118777.10_3	ABCG2	chr4	89011416	89152474	-	protein_coding_gene	1761.28	1362.33	869.814	1924.76	2873.81	875.117	1044.74	1640.12	533.271	789.67	535.237	395.67	1000.83	641.066	297.709	471.42	842.884	1275.31	632.388	612.216	598.272	488.547	589.965	561.231	1544	641.605	1501.23	594.118	0.415568	-1.26684	1.45947e-07	1.17938e-05
ENSG00000134201.10_3	GSTM5	chr1	110254877	110318050	+	protein_coding_gene	264.958	203.205	338.311	300.587	770.947	220.368	225.417	110.141	101.728	104.254	156.454	72.1387	186.477	65.3751	38.1407	48.3772	85.0825	151.307	119.299	83.1816	99.8991	104.689	33.8057	33.6739	304.242	92.7427	245.188	92.4908	0.304929	-1.71346	1.48256e-07	1.1963e-05
ENSG00000182749.5_3	PAQR7	chr1	26187701	26197744	-	protein_coding_gene	392.077	701.2	703.33	382.748	501.27	486.294	529.061	1127.58	242.007	171.909	213.066	210.951	317.408	491.777	176.93	198.655	131.594	372.607	299.83	194.09	291.84	352.234	151.581	133.573	602.946	246.878	515.166	212.008	0.409644	-1.28756	1.48731e-07	1.19839e-05
ENSG00000166126.10_4	AMN	chr14	103388993	103399933	+	protein_coding_gene	75.8117	12.4022	97.0417	6.01174	12.3516	30.7244	38.0842	32.7152	2.14165	8.8727	4.11721	3.27903	10.9109	2.92724	3.17839	3.08791	3.4033	15.4395	5.2787	21.0727	3.36739	6.54305	15.2671	4.48985	38.1429	7.08604	31.7198	4.30353	0.185197	-2.43286	1.50245e-07	1.20883e-05
ENSG00000134690.10_3	CDCA8	chr1	38158090	38175391	+	protein_coding_gene	29.8652	26.7124	37.3922	40.0783	47.3479	36.0217	59.6995	21.8102	63.1787	48.7999	116.311	52.4645	59.514	126.847	200.239	125.575	60.125	86.4614	85.5149	51.018	101.022	124.318	158.124	98.7767	37.3659	97.393	36.707	92.619	2.60948	1.38376	1.50882e-07	1.2122e-05
ENSG00000103460.16_3	TOX3	chr16	52471917	52581714	-	protein_coding_gene	507.709	967.37	446.926	790.544	2644.28	761.754	871.819	200.653	2928.71	2719.48	5684.84	4222.3	4664.91	3937.14	3033.24	5743.51	2207.61	5816.59	2129.43	1522.78	1507.47	732.821	3691.37	3389.84	898.882	3370.75	776.149	3211.54	3.75018	1.90696	1.51157e-07	1.21264e-05
ENSG00000178187.7_3	ZNF454	chr5	178368192	178393434	+	protein_coding_gene	177.66	338.675	447.816	325.636	335.553	432.261	301.586	400.216	138.137	99.8179	208.948	115.859	162.672	60.4964	62.5083	32.9377	48.7806	185.274	135.135	154.163	152.655	68.702	20.7196	49.3883	344.925	106.012	337.114	107.838	0.307451	-1.70157	1.53727e-07	1.23148e-05
ENSG00000176798.2_3	OR51L1	chr11	5016081	5026766	+	protein_coding_gene	10.7209	53.4248	4.45145	24.047	5.14651	5.29732	4.11721	4.36203	19.2749	51.018	383.93	55.7435	254.918	81.9628	263.806	300.556	125.922	30.8791	190.033	32.1635	13.4695	19.6291	13.0861	203.166	13.9459	127.472	5.22191	68.8532	9.13046	3.19069	1.57141e-07	1.2552e-05
ENSG00000119147.9_3	C2orf40	chr2	106679702	106694615	+	protein_coding_gene	284.103	222.285	481.647	200.391	170.864	420.607	470.391	386.04	143.491	92.0543	18.5274	64.4876	131.923	120.017	12.7136	26.7619	58.9905	161.6	98.1837	84.2907	181.839	62.1589	37.0773	30.3065	329.541	82.7764	335.071	74.3891	0.251228	-1.99293	1.57126e-07	1.2552e-05
ENSG00000196586.13_3	MYO6	chr6	76458909	76629254	+	protein_coding_gene	7241.17	8137.74	15022.8	10578.7	11167.9	13711.6	8721.28	9110.1	14272	37787.7	24322.4	72272	47856.2	42769.9	11738.9	21118.2	34941.7	24718.7	18597.9	72988	30813.8	10736	32249.6	17209.6	10461.4	32149.5	9844.38	27766.3	3.07316	1.61972	1.60579e-07	1.28082e-05
ENSG00000170271.10_4	FAXDC2	chr5	154198051	154238812	-	protein_coding_gene	781.091	836.67	1256.2	844.65	1668.5	797.776	885.2	1041.43	455.101	473.58	462.157	374.903	649.694	395.178	187.525	112.194	192.854	689.632	460.302	360.453	414.188	392.583	212.649	145.92	1013.94	373.682	864.925	393.88	0.368596	-1.43989	1.65948e-07	1.32143e-05
ENSG00000140015.19_3	KCNH5	chr14	63166172	63568755	-	protein_coding_gene	439.555	174.585	208.328	235.46	171.893	76.2813	86.4614	160.305	150.987	124.218	36.0256	55.7435	39.676	61.4721	24.3677	63.8167	17.0165	56.6116	29.5607	60.9998	44.8985	29.4437	58.8874	49.3883	194.109	56.4445	173.239	52.5659	0.290534	-1.78322	1.66147e-07	1.32143e-05
ENSG00000129474.15_4	AJUBA	chr14	23440383	23451851	-	protein_coding_gene	719.829	629.649	1452.06	552.078	880.053	765.992	709.189	496.181	284.84	237.345	236.74	380.368	513.804	489.825	337.969	170.864	281.339	388.047	349.45	442.526	278.371	226.826	284.623	76.3274	775.63	311.204	714.509	284.731	0.401253	-1.31741	1.66799e-07	1.32472e-05
ENSG00000156486.7_3	KCNS2	chr8	99439250	99445076	+	protein_coding_gene	84.2353	14.3102	25.8184	25.0489	46.3186	28.6055	45.2893	58.8874	27.8415	8.8727	21.6153	13.1161	17.8542	22.4422	5.29732	3.08791	10.2099	9.26372	11.6131	9.98179	10.1022	11.9956	7.63355	10.1022	41.0642	12.5643	36.9474	10.156	0.306123	-1.70782	1.68151e-07	1.33354e-05
ENSG00000133740.10_3	E2F5	chr8	86089460	86129387	+	protein_coding_gene	387.482	660.178	823.519	667.303	715.365	662.164	656.695	412.212	824.536	809.634	1699.38	1054.76	1324.19	886.955	1392.13	1841.42	1179.81	1093.12	1012.45	1327.58	773.376	1142.85	1272.62	2020.43	623.115	1228.45	661.171	1161.33	1.97162	0.97938	1.69671e-07	1.34367e-05
ENSG00000167641.10_3	PPP1R14A	chr19	38741877	38747231	-	protein_coding_gene	151.623	107.804	159.362	79.1546	98.813	176.93	134.839	70.883	49.258	52.1271	39.1135	29.5113	72.4087	59.5206	9.53517	13.3809	31.7641	61.7581	33.7837	41.0362	81.9397	31.6247	37.0773	13.4695	122.426	41.0818	121.321	38.0954	0.335589	-1.57523	1.70462e-07	1.34801e-05
ENSG00000095777.14_3	MYO3A	chr10	26223196	26501456	+	protein_coding_gene	204.462	39.1146	119.299	66.1292	194.538	47.6758	142.044	1273.71	69.6037	131.981	31.9084	32.7903	45.6274	41.9571	8.4757	44.26	28.3608	58.6702	30.6164	58.7816	42.6536	44.7108	28.3532	26.9391	260.872	45.3556	130.671	42.3054	0.173905	-2.52363	1.72132e-07	1.35928e-05
ENSG00000204003.8_4	AL355987.1	chr9	139632619	139642905	-	protein_coding_gene	146.263	77.2751	82.797	74.1448	64.846	41.3191	89.5493	164.667	21.4165	48.7999	39.1135	24.0462	47.6112	21.4664	5.29732	28.8205	19.2854	67.9339	40.1181	28.8363	12.3471	15.2671	17.4481	15.7145	92.6076	28.3451	80.0361	22.7563	0.306321	-1.70688	1.75202e-07	1.3801e-05
ENSG00000197467.13_3	COL13A1	chr10	71561687	71724031	+	protein_coding_gene	395.906	351.077	393.509	627.225	1318.54	256.39	358.197	97.0552	154.199	128.654	162.63	79.7898	215.242	121.968	49.7948	95.7251	111.174	318.054	212.204	65.4362	89.797	81.7881	52.3444	56.1231	474.737	124.683	375.853	103.45	0.262721	-1.9284	1.75266e-07	1.3801e-05
ENSG00000137634.9_3	NXPE4	chr11	114441313	114466484	-	protein_coding_gene	165.407	105.896	1014.04	134.262	129.692	620.845	1203.25	1902.94	114.578	13.3091	4.11721	75.4177	78.3601	14.6362	3.17839	9.26372	11.3443	319.084	5.2787	85.3998	17.9594	2.18102	19.6291	6.73477	659.542	48.7795	393.126	13.9726	0.0739816	-3.75669	1.76456e-07	1.3875e-05
ENSG00000179071.4_3	CCDC89	chr11	85395909	85397320	-	protein_coding_gene	49.0096	69.643	60.5398	114.223	115.282	54.0326	71.0219	26.1722	31.054	19.9636	39.1135	31.6973	54.5545	21.4664	22.2487	18.5274	31.7641	41.1721	28.505	12.2	24.6942	20.7196	17.4481	20.2043	69.9905	27.2083	65.0914	23.4714	0.389516	-1.36025	1.77261e-07	1.39185e-05
ENSG00000186871.6_4	ERCC6L	chrX	71424507	71458897	-	protein_coding_gene	35.2257	25.7584	24.9281	37.0724	18.5274	38.1407	28.8205	16.3576	33.1956	51.018	91.6079	59.0226	50.5869	72.2053	201.298	138.956	49.9151	45.2893	62.2886	35.4908	162.757	191.929	186.477	140.308	28.1038	98.2716	27.2894	67.247	3.49274	1.80436	1.78858e-07	1.4024e-05
ENSG00000182472.8_3	CAPN12	chr19	39220827	39260544	-	protein_coding_gene	61.262	43.8846	59.6495	57.1116	31.9084	37.0812	36.0256	49.0728	29.9831	12.2	15.4395	16.3952	32.7327	28.2967	13.773	19.5567	6.8066	28.8205	6.33443	14.4181	11.2246	13.0861	28.3532	7.85723	46.9995	17.8299	46.4787	14.9288	0.380131	-1.39543	1.80483e-07	1.41315e-05
ENSG00000198822.10_3	GRM3	chr7	86273230	86494200	+	protein_coding_gene	165.407	38.1606	2701.14	44.0861	33.967	63.5678	38.0842	59.9779	95.3035	51.018	22.6446	25.1392	39.676	64.3993	15.8919	44.26	17.0165	49.4065	31.6722	47.6908	35.9188	20.7196	73.064	14.592	393.049	40.5258	52.032	37.7974	0.103101	-3.27787	1.82073e-07	1.42359e-05
ENSG00000137463.4_3	MGARP	chr4	140187317	140201492	-	protein_coding_gene	77.3433	60.1029	88.1388	46.09	61.7581	60.3894	77.1977	88.3311	46.0455	22.1818	36.0256	20.7672	39.676	27.3209	30.7244	22.6446	44.2429	40.1428	27.4492	31.0545	59.4905	19.6291	15.2671	43.776	69.9189	32.9024	69.4779	30.8894	0.470013	-1.08923	1.85869e-07	1.45121e-05
ENSG00000093217.9_3	XYLB	chr3	38388251	38462839	+	protein_coding_gene	399.735	725.051	946.379	588.149	789.475	717.257	518.768	247.545	912.344	860.652	1329.86	1132.36	1387.67	1227.49	1290.43	1332.95	1575.73	1443.08	1614.23	883.943	867.663	1033.8	1274.8	1404.2	616.545	1223.2	652.703	1282.61	1.9839	0.98834	1.88504e-07	1.46972e-05
ENSG00000203727.3_3	SAMD5	chr6	147830063	148058683	+	protein_coding_gene	945.732	1867.96	1217.03	924.806	2113.16	1322.21	832.706	511.448	1288.2	12134.5	10454.6	5007.08	10978.3	8881.25	490.531	3277.3	6255.26	5007.56	3161.94	5512.17	4778.32	906.212	2953.09	5556.19	1216.88	5415.16	1081.38	5007.32	4.45004	2.15382	1.88777e-07	1.46979e-05
ENSG00000110931.18_3	CAMKK2	chr12	121675494	121736111	-	protein_coding_gene	2017.05	6991.01	2458.98	4917.61	2586.64	2477.02	2902.63	1283.53	4030.59	6747.69	15953.2	6689.22	4535.96	11097.2	34687.9	22639.5	11114	4752.29	17427.1	5654.13	7511.52	19419.8	6760.06	28603.7	3204.31	12976.5	2531.83	9304.35	4.04969	2.01781	1.90277e-07	1.47938e-05
ENSG00000268686.1_3	AC010643.1	chr19	49871962	49891338	-	as_lncRNA	11.4866	13.3562	16.9155	35.0685	13.3809	20.1298	10.293	15.2671	41.7622	99.8179	86.4614	102.743	37.6922	141.483	194.941	94.6958	48.7806	43.2307	30.6164	44.3635	84.1847	2.18102	41.4393	110.001	16.9872	75.2747	14.324	66.4826	4.43726	2.14967	1.91054e-07	1.48334e-05
ENSG00000152642.10_3	GPD1L	chr3	32147181	32210205	+	protein_coding_gene	12163.6	9535.37	29411.6	12896.2	9849.39	17175	10559.6	11316.2	8951.04	3429.3	3127.02	4160	7943.13	3261.92	4804.67	6403.29	5958.04	11286.3	7703.73	5578.71	5429.35	4825.5	5585.58	3340.45	14113.4	5736.75	11739.9	5504.03	0.406476	-1.29876	1.91962e-07	1.48831e-05
ENSG00000187922.13_3	LCN10	chr9	139632619	139637808	-	protein_coding_gene	74.2802	31.4825	40.9534	37.0724	46.3186	23.3082	39.1135	88.3311	8.56661	19.9636	13.3809	14.2091	24.7975	9.75748	5.29732	12.3516	12.4788	39.1135	23.2263	15.5272	6.73477	5.45254	3.27152	7.85723	47.6075	13.8741	40.0334	12.4152	0.29191	-1.7764	1.95427e-07	1.51306e-05
ENSG00000135052.16_4	GOLM1	chr9	88641061	88715088	-	protein_coding_gene	7321.58	20590.5	16989.4	6544.78	3563.44	15536	10537	5781.87	17715.7	16924.7	84426.5	35746.9	32497.6	40614.5	55530.7	20417.2	61715.4	24268.9	100232	14560.1	36954.8	57562.5	11142.8	58099.8	10858.1	41775.6	8929.27	36350.9	3.84742	1.94389	1.9632e-07	1.51785e-05
ENSG00000119632.3_3	IFI27L2	chr14	94594116	94596590	-	protein_coding_gene	261.895	170.768	235.037	241.472	74.1098	168.455	215.124	125.408	42.8331	66.5453	27.7912	48.0925	70.4249	155.144	38.1407	42.2014	57.8561	66.9046	43.2853	56.5635	143.675	77.426	44.7108	21.3268	186.534	62.6826	192.946	52.328	0.335997	-1.57348	1.96779e-07	1.51928e-05
ENSG00000157227.12_3	MMP14	chr14	23305766	23318236	+	protein_coding_gene	2144.17	1268.84	1911.45	1370.68	1745.7	1402.73	1644.82	1504.9	486.155	470.253	555.823	474.367	1221.03	784.501	685.473	355.109	558.141	664.929	1219.38	600.016	1089.91	845.143	428.57	206.533	1624.16	665.333	1574.86	579.079	0.409654	-1.28752	1.97344e-07	1.52153e-05
ENSG00000132746.14_3	ALDH3B2	chr11	67429633	67448671	-	protein_coding_gene	88.0641	147.872	118.409	128.251	28.8205	99.5895	159.542	186.477	675.691	118.672	724.629	532.296	634.816	404.935	1696.2	1195.02	58.9905	30.8791	420.184	195.199	652.15	1064.34	881.13	1437.87	119.628	670.188	123.33	643.483	5.60308	2.48622	1.97837e-07	1.52321e-05
ENSG00000118971.7_4	CCND2	chr12	4382938	4414516	+	protein_coding_gene	7085.72	2874.44	6641.57	4088.99	9957.47	3250.43	4609.22	2933.47	2317.27	1833.32	1782.75	1578.31	4186.81	1627.55	901.603	1708.64	2005.68	2455.92	2864.22	1692.47	2806.16	2552.88	1332.6	1322.26	5180.16	2060.53	4349.1	1808.04	0.39777	-1.32999	1.98488e-07	1.5261e-05
ENSG00000067191.15_3	CACNB1	chr17	37329709	37353956	-	protein_coding_gene	117.164	137.378	129.092	230.45	179.099	113.363	159.542	127.589	39.6206	60.9998	52.4944	30.6043	98.1981	72.2053	55.0921	62.7874	43.1085	104.989	72.846	75.418	106.634	92.6932	90.5121	43.776	149.21	68.8737	133.235	67.4964	0.461965	-1.11415	1.99622e-07	1.53269e-05
ENSG00000223838.1_2	AC007091.1	chr7	19393157	19618229	+	lncRNA	244.282	48.6547	81.0165	191.374	37.0549	88.9949	50.4358	58.8874	183.111	80.9634	190.421	308.229	602.083	87.8173	3756.86	1699.38	18464	186.304	178.42	58.7816	38.1637	534.349	165.757	23021.7	100.088	3097.27	69.9519	188.362	30.9393	4.95137	2.02008e-07	1.54672e-05
ENSG00000116260.16_3	QSOX1	chr1	180123969	180173165	+	protein_coding_gene	3534.05	1306.05	1693.33	1278.5	2360.19	1040.39	1538.81	893.126	601.804	577.835	572.292	592.412	645.727	700.587	444.974	1691.14	300.625	703.013	863.595	436.981	532.047	682.658	744.817	570.211	1705.56	666.295	1422.43	597.108	0.390641	-1.35609	2.01792e-07	1.54672e-05
ENSG00000121075.9_3	TBX4	chr17	59529765	59562471	+	protein_coding_gene	506.177	290.02	195.864	210.411	860.497	15.8919	33.967	3.27152	5.35413	31.0545	16.4688	29.5113	15.8704	37.0784	12.7136	13.3809	5.67217	29.8498	67.5673	8.8727	31.4289	46.8918	101.417	43.776	264.512	31.0567	203.137	29.6805	0.11738	-3.09074	2.03251e-07	1.5541e-05
ENSG00000180871.7_3	CXCR2	chr2	218990012	219001976	+	protein_coding_gene	762.712	92.5394	70.333	54.1057	36.0256	68.8651	54.553	85.0596	58.8954	14.4181	24.7033	52.4645	38.6841	42.9329	11.6541	24.7033	37.4363	38.0842	21.1148	17.7454	15.7145	21.8102	10.9051	4.48985	153.024	27.2347	69.599	23.2567	0.177836	-2.49138	2.03661e-07	1.55509e-05
ENSG00000280719.1_2	PCAT5	chr10	36067230	36089848	+	lncRNA	10.7209	2.86204	1.78058	8.01566	4.11721	18.0109	2.0586	5.45254	249.503	114.236	418.926	263.415	378.906	439.086	3.17839	3.08791	6.8066	6.17581	1.05574	59.8907	153.777	3.27152	16.3576	2.24492	6.62729	132.495	4.78487	38.1242	19.9981	4.32179	2.1073e-07	1.60372e-05
ENSG00000050344.8_3	NFE2L3	chr7	26191860	26226745	+	protein_coding_gene	248.111	93.4934	101.493	226.442	191.45	92.1733	287.175	210.468	1125.44	535.689	1695.26	738.875	1024.63	1455.82	807.311	1083.86	243.903	285.117	237.541	319.417	377.147	494	297.709	277.248	181.351	687.435	200.959	514.845	3.79089	1.92253	2.1056e-07	1.60372e-05
ENSG00000121577.13_3	POPDC2	chr3	119355304	119384171	-	protein_coding_gene	1137.18	416.904	865.363	638.247	1008.72	559.397	588.761	878.949	551.476	291.69	303.644	224.067	526.699	194.174	128.195	275.853	341.464	451.864	377.955	181.89	470.312	237.731	285.713	268.268	761.689	319.437	751.805	288.702	0.419347	-1.25378	2.10897e-07	1.60372e-05
ENSG00000163739.4_3	CXCL1	chr4	74735110	74736959	+	protein_coding_gene	967.174	148.826	64.9912	374.732	303.644	51.9137	229.534	169.029	36.4081	37.709	12.3516	151.928	41.6598	66.3508	10.5946	69.9926	14.7476	59.6995	58.0656	122	46.0209	45.8013	8.72406	19.0819	288.731	50.071	199.282	43.7306	0.173356	-2.52819	2.12377e-07	1.61276e-05
ENSG00000252213.1	SNORA74	chr5	138611869	138612009	+	snoRNA	176.128	210.837	198.535	303.593	41.1721	196.001	286.146	75.245	3285.29	1233.31	943.87	247.02	407.671	401.032	973.647	1855.83	686.332	506.417	117.187	652.144	565.721	1030.53	278.079	1098.89	185.957	892.686	197.268	669.238	4.80009	2.26306	2.14363e-07	1.62339e-05
ENSG00000178150.9_3	ZNF114	chr19	48773359	48790865	+	protein_coding_gene	13.784	25.7584	33.8311	28.0548	27.7912	23.3082	41.1721	19.6291	8.56661	14.4181	12.3516	10.9301	8.9271	20.4907	5.29732	13.3809	7.94103	19.5567	6.33443	12.2	10.1022	8.72406	6.54305	10.1022	26.6661	10.9916	26.7748	10.1022	0.414861	-1.2693	2.14244e-07	1.62339e-05
ENSG00000253400.1_3	AL356133.2	chr9	26801731	26805860	+	lncRNA	1.53155	2.86204	5.34175	1.00196	1.0293	1.05946	1.0293	2.18102	5.35413	14.4181	6.17581	15.3021	2.9757	26.3452	57.211	4.11721	13.6132	2.0586	352.617	1.10909	3.36739	128.68	4.36203	25.8166	2.00455	41.4702	1.29551	9.89451	20.5624	4.36194	2.15006e-07	1.62382e-05
ENSG00000257582.5_2	LINC01475	chr10	101286107	101290934	-	lncRNA	2.29733	1.90803	1.78058	2.00391	1.0293	1.05946	2.0586	1.09051	5.35413	9.98179	9.26372	7.65107	1.9838	6.83023	109.125	19.5567	62.3938	38.0842	2.11148	21.0727	4.48985	20.7196	4.36203	3.36739	1.65347	20.3967	1.8443	8.4574	12.224	3.61165	2.1493e-07	1.62382e-05
ENSG00000008118.9_3	CAMK1G	chr1	209757062	209787283	+	protein_coding_gene	93.4246	55.3328	138.885	100.196	399.369	48.7353	59.6995	58.8874	22.4874	38.8181	57.6409	31.6973	36.7003	35.1269	12.7136	16.4688	37.4363	72.0512	33.7837	29.9454	23.5717	30.5342	44.7108	20.2043	119.316	33.9932	76.562	32.7405	0.285063	-1.81065	2.15699e-07	1.62684e-05
ENSG00000277639.2_4	AC007906.2	chr16	53069602	53086785	-	protein_coding_gene	374.464	598.167	283.112	380.744	360.256	466.164	389.076	186.477	303.044	64.3271	24.7033	85.2548	162.672	65.3751	44.4974	24.7033	26.092	161.6	126.689	62.1089	37.0412	45.8013	14.1766	16.8369	379.807	79.0577	377.604	53.9551	0.208216	-2.26384	2.16544e-07	1.63099e-05
ENSG00000168899.4_3	VAMP5	chr2	85811531	85820535	+	protein_coding_gene	234.327	218.469	211.889	307.601	209.978	305.125	399.369	343.51	168.12	155.272	112.194	80.8828	137.874	147.338	149.384	133.809	108.906	169.835	130.912	194.09	224.492	149.4	160.305	65.1028	278.784	142.995	269.726	148.361	0.513202	-0.962403	2.17968e-07	1.63949e-05
ENSG00000172789.3_3	HOXC5	chr12	54426637	54429142	+	protein_coding_gene	1.53155	0.954014	4.45145	3.00587	1.0293	10.5946	4.11721	1.09051	4.28331	5.54544	3.08791	8.74408	23.8056	7.80598	48.7353	12.3516	40.8396	24.7033	47.5083	35.4908	8.9797	21.8102	49.0728	20.2043	3.34682	22.6855	2.26871	21.0072	6.83332	2.77259	2.18336e-07	1.64004e-05
ENSG00000266262.1	MIR4428	chr1	237634419	237634491	+	miRNA	3.82888	2.86204	1.78058	4.00783	6.17581	1.05946	1.0293	1.09051	2.14165	11.0909	73.0805	25.1392	0.9919	1.9515	103.827	10.293	38.5707	7.20512	38.0066	7.76361	4.48985	37.0773	62.1589	56.1231	2.7293	29.9945	2.32131	18.1151	10.9341	3.45076	2.20548e-07	1.65441e-05
ENSG00000206620.1	SNORD45C	chr1	76252757	76252835	+	snoRNA	23.739	18.1263	18.6961	26.0509	27.7912	25.4271	24.7033	20.7196	70.6745	45.4726	63.8167	65.5806	91.2548	79.0356	27.546	99.8423	113.443	53.5237	33.7837	32.1635	25.8166	30.5342	69.7925	63.9803	23.1567	60.3913	24.2211	63.8985	2.61151	1.38488	2.20968e-07	1.65532e-05
ENSG00000229332.2_2	PGBD4P8	chr1	60563087	60563648	+	pseudogene	2.29733	0.954014	11.5738	64.1253	1.0293	7.41624	2.0586	1.09051	115.649	12.2	1117.82	448.134	63.4816	5.85449	199.179	1003.57	5.67217	39.1135	68.623	6.65453	37.0412	281.351	34.8962	190.819	11.3181	226.879	2.17796	66.0523	20.0569	4.32603	2.24615e-07	1.68037e-05
ENSG00000128710.5_3	HOXD10	chr2	176973518	176984670	+	protein_coding_gene	885.236	844.302	2368.17	616.204	2695.74	976.825	662.871	808.066	313.752	176.345	34.9963	263.415	491.982	251.743	30.7244	91.6079	77.1414	752.42	97.128	220.708	138.063	47.9823	73.064	10.1022	1232.18	191.948	864.769	117.595	0.155803	-2.68221	2.25298e-07	1.68321e-05
ENSG00000167635.11_3	ZNF146	chr19	36705504	36729676	+	protein_coding_gene	5153.67	6130.49	7075.14	7452.56	5349.28	5621.51	5222.68	6683.72	9488.59	7149.18	10243.6	11512.7	7007.77	7784.51	9949.42	10550.3	10192.9	7704.33	8317.11	10480.9	6831.3	10964	9279.13	10269.4	6086.13	9232.82	5876	9719	1.51703	0.601249	2.27635e-07	1.69838e-05
ENSG00000118526.6_3	TCF21	chr6	134210276	134216691	+	protein_coding_gene	513.835	537.11	681.072	463.906	673.164	520.196	682.427	271.536	330.885	218.49	163.659	183.626	272.772	194.174	105.946	97.7837	277.936	365.402	314.61	219.599	198.676	298.799	63.2494	161.635	542.906	216.703	528.653	208.583	0.399137	-1.32504	2.28952e-07	1.7059e-05
ENSG00000284341.1_2	AL807752.7	chr9	139871970	139879887	+	protein_coding_gene	3966.72	698.338	1771.68	2753.38	4452.76	1361.41	2457.97	3473.27	749.578	360.453	1044.74	346.484	1264.67	327.851	110.184	377.754	291.549	1014.89	478.25	605.562	193.063	823.333	106.87	24.6942	2616.94	507.496	2605.68	369.104	0.193939	-2.36633	2.30981e-07	1.71872e-05
ENSG00000110195.12_3	FOLR1	chr11	71900602	71907367	+	protein_coding_gene	22.9733	26.7124	40.9534	12.0235	21.6153	33.9028	39.1135	45.8013	5.35413	28.8363	4.11721	9.83709	3.9676	9.75748	2.11893	3.08791	3.4033	8.23442	2.11148	13.3091	3.36739	9.81457	1.09051	1.12246	30.3869	6.84561	30.3076	4.0424	0.225062	-2.15161	2.33204e-07	1.73293e-05
ENSG00000255929.5_3	AP000943.3	chr11	94278496	94473521	-	as_lncRNA	199.102	110.666	2459.87	153.299	372.607	262.747	240.857	121.046	104.941	87.6179	53.5237	71.0457	342.205	95.6233	36.0217	63.8167	38.5707	126.604	47.5083	83.1816	55.0006	44.7108	47.9823	44.8985	490.025	83.9533	219.979	59.4087	0.171366	-2.54485	2.33626e-07	1.73374e-05
ENSG00000268650.3_3	AC005759.1	chr19	18315540	18331290	+	as_lncRNA	257.3	22.8963	23.1476	20.0391	25.7326	16.9514	26.7619	14.1766	11.7791	12.2	11.3223	13.1161	14.8785	17.5635	5.29732	10.293	11.3443	12.3516	3.16722	6.65453	8.9797	8.72406	5.45254	3.36739	50.8757	9.7807	23.0219	10.8077	0.191649	-2.38346	2.36422e-07	1.75215e-05
ENSG00000279427.1_3	AC007490.1	chr16	52470684	52471386	-	protein_coding_gene	5.36043	16.2182	5.34175	7.0137	13.3809	9.53517	10.293	6.54305	61.0371	49.9089	43.2307	44.8134	14.8785	61.4721	30.7244	26.7619	12.4788	41.1721	11.6131	29.9454	19.0819	10.9051	17.4481	56.1231	9.21078	33.2247	8.27443	30.3349	3.62382	1.85751	2.38622e-07	1.76096e-05
ENSG00000233251.7_3	AC007743.1	chr2	56400669	56412905	-	as_lncRNA	56.6674	45.7927	48.966	111.217	178.069	33.9028	42.2014	42.5298	13.9207	24.3999	17.4981	28.4183	38.6841	13.6605	6.35678	10.293	5.67217	40.1428	13.7246	31.0545	17.9594	9.81457	29.4437	11.2246	69.9183	19.5167	47.3793	15.7094	0.279454	-1.83932	2.38881e-07	1.76096e-05
ENSG00000007314.12_3	SCN4A	chr17	62015914	62050278	-	protein_coding_gene	16.8471	6.6781	15.1349	24.047	53.5237	7.41624	15.4395	13.0861	4.28331	5.54544	8.23442	2.18602	3.9676	4.87874	3.17839	6.17581	2.26887	9.26372	4.22296	4.43635	3.36739	4.36203	11.9956	2.24492	19.0216	5.03822	15.2872	4.32267	0.266053	-1.91022	2.37929e-07	1.76096e-05
ENSG00000177551.5_3	NHLH2	chr1	116378998	116386538	-	protein_coding_gene	14.5497	15.2642	23.1476	2.00391	14.4102	11.6541	8.23442	8.72406	6.42496	2.21818	1.0293	6.55806	3.9676	6.83023	2.11893	3.08791	1.13443	4.11721	1.05574	2.21818	1.12246	4.36203	2.18102	1.12246	12.2485	3.09679	13.0322	2.21818	0.253091	-1.98227	2.388e-07	1.76096e-05
ENSG00000166509.10_3	CLEC3A	chr16	78056412	78100658	+	protein_coding_gene	153.921	174.585	152.24	251.491	158.513	922.792	2894.4	146.128	47.1164	97.5997	64.846	8.74408	17.8542	56.5934	3.17839	11.3223	11.3443	56.6116	13.7246	392.617	13.4695	19.6291	15.2671	19.0819	606.758	53.0625	166.549	18.468	0.0874408	-3.51555	2.40351e-07	1.76944e-05
ENSG00000091127.13_3	PUS7	chr7	105080108	105162714	-	protein_coding_gene	1423.58	1229.72	1340.78	1338.61	1290.75	1357.17	1181.64	1263.9	1835.4	1277.67	2614.43	2242.86	2132.58	2066.63	2839.36	3482.13	2130.47	1755.99	1721.91	1590.43	2037.27	2906.2	2685.92	1980.02	1303.27	2206.2	1314.68	2098.55	1.69279	0.7594	2.40723e-07	1.76982e-05
ENSG00000077232.17_3	DNAJC10	chr2	183580768	183659191	+	protein_coding_gene	7179.14	13196.9	9650.75	19472	10291	9530.93	8165.45	7677.17	34386.4	21653.8	35915.4	28512.3	26377.6	19245.6	22291.1	21400.2	13710.8	12555.4	21040.9	17573.5	17001.9	28031.5	16049	20539.9	10645.4	22267.8	9590.84	21220.6	2.09179	1.06474	2.4138e-07	1.7723e-05
ENSG00000135447.16_3	PPP1R1A	chr12	54969171	54982443	-	protein_coding_gene	135.542	58.1949	115.738	107.209	222.329	42.3785	86.4614	99.2362	70.6745	57.6726	13.3809	22.9532	39.676	18.5392	4.23785	10.293	9.07546	37.0549	24.282	15.5272	17.9594	57.7969	25.0817	15.7145	108.386	27.495	103.223	20.7462	0.253625	-1.97923	2.42041e-07	1.77481e-05
ENSG00000100097.11_3	LGALS1	chr22	38071615	38075813	+	protein_coding_gene	4076.22	3188.31	4756.82	4207.22	3294.8	3800.29	4738.91	3453.64	2334.4	1569.36	1630.41	912.664	1713.01	1924.17	973.647	1326.77	2193.99	1698.35	1693.41	1818.9	4274.34	1701.19	1029.44	822.765	3939.53	1726.05	3938.26	1695.88	0.438127	-1.19058	2.45073e-07	1.79467e-05
ENSG00000280422.1_3	AC115284.2	chr3	51985865	51987918	-	protein_coding_gene	11.4866	18.1263	26.7087	3.00587	11.3223	6.35678	17.4981	16.3576	4.28331	3.32726	2.0586	5.46505	7.9352	3.90299	3.17839	1.0293	1.13443	5.14651	6.33443	1.10909	3.36739	2.18102	6.54305	1.12246	13.8578	3.63241	13.9221	3.34732	0.262914	-1.92734	2.47287e-07	1.80373e-05
ENSG00000140538.16_3	NTRK3	chr15	88402982	88799999	-	protein_coding_gene	1469.52	1068.5	495.892	1443.82	3042.62	541.386	765.801	402.397	230.228	247.327	356.139	245.927	721.111	201.98	81.5787	139.985	148.611	762.713	407.515	216.272	141.43	138.494	70.883	152.655	1153.74	266.428	917.148	209.126	0.230959	-2.11429	2.47184e-07	1.80373e-05
ENSG00000250413.1_3	AC005674.1	chr4	10008106	10011349	+	as_lncRNA	51.3069	6.6781	12.4641	23.045	359.226	11.6541	8.23442	6.54305	6.42496	7.76361	9.26372	15.3021	4.9595	12.6847	1.05946	1.0293	4.53773	16.4688	2.11148	3.32726	3.36739	3.27152	5.45254	2.24492	59.894	6.20432	12.0591	4.74862	0.103789	-3.26828	2.46725e-07	1.80373e-05
ENSG00000278486.1_2	YRDCP1	chr9	97194913	97195555	-	pseudogene	0.765775	2.86204	0.890291	2.00391	1.0293	1.05946	2.0586	1.09051	4.28331	7.76361	15.4395	4.37204	7.9352	3.90299	8.4757	12.3516	14.7476	7.20512	8.44591	3.32726	13.4695	3.27152	23.9912	10.1022	1.46999	9.31777	1.07499	8.19056	6.39107	2.67606	2.48882e-07	1.80962e-05
ENSG00000148175.12_3	STOM	chr9	124101266	124132582	-	protein_coding_gene	12366.5	3534.62	5067.54	4397.59	8119.14	5215.74	6083.18	8457.98	4220.13	2756.08	1970.08	2571.85	4801.79	3030.67	1191.9	2340.63	2097.57	3400.81	3259.07	2174.92	3157.49	2537.61	2131.94	903.582	6655.28	2659.13	5649.46	2554.73	0.399553	-1.32354	2.48604e-07	1.80962e-05
ENSG00000225439.2_3	BOLA3-AS1	chr2	74375136	74377188	+	as_lncRNA	62.7936	44.8387	73.0038	85.1663	98.813	68.8651	64.846	51.2539	27.8415	31.0545	25.7326	21.8602	33.7246	38.0542	9.53517	16.4688	15.8821	32.9377	36.9509	22.1818	14.592	19.6291	61.0684	6.73477	68.6976	25.8905	66.8556	23.9572	0.377508	-1.40542	2.49074e-07	1.80962e-05
ENSG00000272327.1	RP11-1002K11.1	chr8	32623643	32625477	+	lncRNA	129.416	43.8846	78.3456	78.1526	73.0805	50.8542	40.1428	33.8057	19.2749	16.6363	4.11721	21.8602	35.7084	15.612	5.29732	10.293	3.4033	26.7619	47.5083	14.4181	21.3268	4.36203	6.54305	14.592	65.9603	16.7322	61.9673	15.102	0.25362	-1.97926	2.49963e-07	1.81371e-05
ENSG00000170854.17_3	RIOX2	chr3	97660662	97691301	-	protein_coding_gene	1853.94	2654.07	2168.75	3184.22	1954.64	2092.44	1971.11	2166.84	3715.77	2879.19	3777.54	4019	3238.55	3705.89	2953.78	3261.86	3031.21	3313.32	3035.25	3502.5	3504.33	5794.96	3174.47	3747.9	2255.75	3540.97	2129.64	3407.91	1.5698	0.650576	2.51146e-07	1.8199e-05
ENSG00000213084.1	AC008555.2	chr19	35343055	35343524	+	pseudogene	0.765775	4.77007	0.890291	1.00196	1.0293	2.11893	3.08791	4.36203	13.9207	11.0909	14.4102	19.6742	24.7975	30.2482	19.0703	4.11721	3.4033	3.08791	13.7246	7.76361	3.36739	6.54305	25.0817	15.7145	2.25328	13.501	1.57411	13.8227	6.12111	2.61379	2.51934e-07	1.82323e-05
ENSG00000243554.1_3	AC004967.1	chr7	97598317	97601566	-	pseudogene	120.227	242.32	178.058	259.507	242.915	220.368	169.835	171.21	396.206	300.563	358.197	418.623	446.355	390.299	497.948	545.53	311.969	310.849	385.345	217.381	464.699	282.442	520.172	231.227	200.555	379.863	199.213	387.822	1.89565	0.922689	2.54606e-07	1.83777e-05
ENSG00000149573.8_3	MPZL2	chr11	118124118	118135251	-	protein_coding_gene	12780.8	5721.22	5305.24	5323.4	5506.77	5047.28	4639.07	7299.86	4309	1986.38	2319.02	4281.32	2444.04	2054.92	3942.26	3500.66	1465.69	2014.34	3504	2128.34	2448.09	3925.83	1100.32	2215.74	6452.95	2727.5	5415.08	2381.53	0.422664	-1.24242	2.54488e-07	1.83777e-05
ENSG00000211544.1	AC069286.1	chr7	3458699	3458781	+	miRNA	3.82888	2.86204	2.67087	3.00587	11.3223	3.17839	1.0293	1.09051	17.1332	18.8545	39.1135	31.6973	89.271	11.709	9.53517	30.8791	54.4528	104.989	7.39017	2.21818	5.61231	1.09051	25.0817	62.8579	3.62352	31.9928	2.93396	21.9681	8.83238	3.1428	2.55539e-07	1.8421e-05
ENSG00000107938.17_3	EDRF1	chr10	127408084	127452712	+	protein_coding_gene	1415.15	2521.46	2667.31	2556.99	3612.85	2324.46	2099.78	1786.25	3425.57	7498.54	6326.09	9435.96	8735.66	8045.04	4288.71	8794.36	7682.38	4152.21	6855.97	3559.06	3282.08	2364.22	3383.85	4406.79	2373.03	5764.78	2422.96	5366.44	2.42936	1.28058	2.57164e-07	1.85141e-05
ENSG00000105538.9_3	RASIP1	chr19	49223844	49243978	-	protein_coding_gene	251.174	124.976	161.143	75.1468	156.454	110.184	150.278	167.938	44.9747	77.6361	83.3735	44.8134	91.2548	76.1083	37.0812	71.0219	57.8561	96.7544	69.6788	47.6908	52.7557	65.4305	99.2362	21.3268	149.662	64.8121	153.366	67.5546	0.432995	-1.20758	2.58186e-07	1.85636e-05
ENSG00000196972.8_3	SMIM10L2B	chrX	134229017	134232664	-	protein_coding_gene	168.471	186.033	462.951	183.358	93.6665	215.071	126.604	389.311	62.1079	22.1818	44.26	26.2322	51.5788	35.1269	50.8542	26.7619	15.8821	91.6079	104.518	33.2726	31.4289	106.87	67.6115	181.839	228.183	59.5083	184.695	47.5571	0.260749	-1.93927	2.60279e-07	1.86899e-05
ENSG00000168491.9_4	CCDC110	chr4	186366336	186392913	-	protein_coding_gene	124.056	353.939	436.243	400.783	213.066	357.039	314.966	440.565	1075.11	776.361	1636.59	917.036	484.047	1472.4	1648.52	1344.27	581.964	275.853	880.486	751.961	667.865	922.57	345.691	1272.87	330.082	940.85	355.489	898.761	2.85107	1.51151	2.62847e-07	1.88498e-05
ENSG00000035499.12_3	DEPDC1B	chr5	59892739	59996017	-	protein_coding_gene	109.506	35.2985	78.3456	77.1507	94.6958	36.0217	102.93	71.9735	131.712	109.8	177.04	130.068	197.388	266.379	542.445	350.992	164.493	400.399	95.0165	87.6179	314.289	249.726	434.022	171.737	75.7402	238.945	77.7481	187.214	3.15312	1.65678	2.63617e-07	1.88807e-05
ENSG00000170312.15_3	CDK1	chr10	62538089	62554610	+	protein_coding_gene	122.524	156.458	116.628	249.487	206.89	128.195	255.267	233.369	409.056	369.326	303.644	484.204	255.91	715.223	1260.76	1009.75	336.927	307.761	233.318	268.399	1716.24	1050.16	1061.06	486.026	183.602	641.736	181.674	446.63	3.49627	1.80582	2.65763e-07	1.89677e-05
ENSG00000107738.19_3	VSIR	chr10	73507316	73533255	-	protein_coding_gene	1637.23	657.316	678.402	565.104	869.76	584.824	955.192	561.611	237.723	363.781	327.318	307.136	610.018	482.995	179.049	314.966	274.533	584.644	461.358	353.799	426.536	355.506	320.609	325.514	813.68	370.343	667.859	340.559	0.455076	-1.13582	2.6586e-07	1.89677e-05
ENSG00000227811.2_3	FAM212B-AS1	chr1	112282463	112290420	+	as_lncRNA	20.6759	14.3102	33.8311	26.0509	40.1428	20.1298	32.9377	22.9007	9.63744	8.8727	10.293	10.9301	4.9595	13.6605	19.0703	3.08791	6.8066	13.3809	11.6131	17.7454	14.592	4.36203	6.54305	7.85723	26.3724	10.2132	24.4758	9.96523	0.387643	-1.3672	2.65653e-07	1.89677e-05
ENSG00000183087.14_3	GAS6	chr13	114523522	114567040	-	protein_coding_gene	1990.25	1290.78	2146.49	1119.19	1483.22	1598.73	1815.69	1268.26	599.663	768.598	573.321	498.413	934.37	844.022	447.093	362.314	529.78	994.306	1043.07	688.743	1320.02	809.157	594.327	286.228	1589.08	705.839	1540.98	644.203	0.444167	-1.17083	2.67728e-07	1.90765e-05
ENSG00000185736.15_3	ADARB2	chr10	1223258	1779670	-	protein_coding_gene	392.843	437.892	125.531	525.025	756.537	662.164	242.915	237.731	6177.6	2340.18	11610.5	3415.66	7214.09	584.473	88.9949	1056.06	750.995	1137.38	418.073	1678.05	5239.65	580.15	2242.08	3821.98	422.58	3022.25	415.368	1960.07	7.15218	2.83838	2.68565e-07	1.91116e-05
ENSG00000132321.16_3	IQCA1	chr2	237232790	237416185	-	protein_coding_gene	269.553	250.906	301.809	237.464	390.106	225.666	237.769	302.071	107.083	76.5271	37.0549	92.9059	168.623	109.284	18.0109	47.3479	44.2429	228.505	104.518	88.727	89.797	31.6247	37.0773	29.184	276.918	81.907	260.229	82.627	0.295948	-1.75659	2.69702e-07	1.9152e-05
ENSG00000131094.3_3	C1QL1	chr17	43037061	43045439	-	protein_coding_gene	32.1626	8.58613	2.67087	48.0939	68.9632	12.7136	4.11721	4.36203	6.42496	2.21818	3.08791	3.27903	4.9595	6.83023	3.17839	3.08791	3.4033	7.20512	6.33443	2.21818	2.24492	1.09051	4.36203	1.12246	22.7087	3.81544	10.6498	3.22871	0.168789	-2.56671	2.69825e-07	1.9152e-05
ENSG00000250590.5_3	LINC02492	chr4	188454032	188593795	-	lncRNA	98.785	27.6664	246.611	39.0763	18.5274	199.179	111.165	31.6247	413.339	92.0543	1102.38	948.733	359.068	951.354	1024.5	183.216	633.014	39.1135	310.387	647.707	388.372	392.583	281.351	930.521	96.5793	543.606	68.9307	402.961	5.62668	2.49228	2.70311e-07	1.9162e-05
ENSG00000177679.15_3	SRRM3	chr7	75831218	75916605	+	protein_coding_gene	112.569	54.3788	78.3456	56.1096	72.0512	32.8434	50.4358	58.8874	34.2664	23.2908	21.6153	15.3021	21.8218	39.0299	37.0812	26.7619	10.2099	39.1135	29.5607	25.509	33.6739	41.4393	31.6247	13.4695	64.4526	27.7356	57.4985	28.1613	0.429473	-1.21936	2.73915e-07	1.9368e-05
ENSG00000137877.9_3	SPTBN5	chr15	42140342	42186275	-	protein_coding_gene	281.805	116.39	193.193	87.1703	117.34	169.514	137.926	142.857	56.7538	36.5999	72.0512	41.5344	79.352	83.9143	73.103	77.1977	20.4198	94.6958	33.7837	43.2544	10.1022	42.5298	50.1634	17.9594	155.774	52.0884	140.392	46.7089	0.334629	-1.57936	2.7384e-07	1.9368e-05
ENSG00000065618.18_3	COL17A1	chr10	105791044	105845760	-	protein_coding_gene	1059.07	653.5	1098.62	480.939	1646.88	839.095	716.394	520.172	309.469	62.1089	59.6995	125.696	292.61	189.295	57.211	79.2563	57.8561	249.091	689.398	103.145	153.777	98.1457	22.9007	12.3471	876.834	160.125	777.745	100.645	0.182646	-2.45288	2.80642e-07	1.98183e-05
ENSG00000186994.11_3	KANK3	chr19	8387468	8408146	-	protein_coding_gene	173.065	153.596	130.873	90.1761	109.106	175.871	116.311	140.675	52.4705	65.4362	48.3772	41.5344	91.2548	47.8116	90.0544	31.9084	65.7971	101.901	104.518	64.3271	68.4702	47.9823	69.7925	31.4289	136.209	63.9415	135.774	64.8816	0.469401	-1.09111	2.83675e-07	2.0007e-05
ENSG00000136732.14_3	GYPC	chr2	127413509	127454251	+	protein_coding_gene	926.588	612.477	975.759	739.444	823.442	789.3	1222.81	1166.84	425.118	510.18	277.912	280.904	509.837	468.359	147.265	279.97	375.497	570.233	412.794	548.998	720.621	400.216	285.713	190.819	907.083	400.277	875.015	406.505	0.441292	-1.18019	2.86533e-07	2.01829e-05
ENSG00000185650.9_3	ZFP36L1	chr14	69254377	69262970	-	protein_coding_gene	6637.74	4046.93	6537.41	4031.88	4442.47	5384.19	4850.07	4070.87	2216.61	2686.21	1563.51	3460.47	4021.16	3566.36	1457.82	2024.64	2891.67	2577.37	3678.19	2675.12	2398.7	2027.25	1591.05	1945.23	5000.19	2548.84	4646.27	2488.04	0.50974	-0.972166	2.87498e-07	2.02252e-05
ENSG00000110777.11_3	POU2AF1	chr11	111222977	111326355	-	protein_coding_gene	1032.26	156.458	202.986	172.337	302.615	197.06	256.296	64.34	72.8162	84.2907	22.6446	65.5806	124.979	75.1326	19.0703	116.311	60.125	180.128	52.787	99.8179	33.6739	37.0773	43.6203	49.3883	298.045	71.0902	200.023	62.8528	0.238454	-2.06822	2.90939e-07	2.04413e-05
ENSG00000158286.12_3	RNF207	chr1	6265535	6281359	+	protein_coding_gene	431.131	457.927	435.352	388.759	576.409	439.677	551.706	374.044	167.049	194.09	224.388	202.207	321.376	245.888	325.255	125.575	116.847	318.054	304.053	180.781	215.513	321.7	217.011	106.634	456.876	224.151	437.515	216.262	0.490791	-1.02682	2.92234e-07	2.05063e-05
ENSG00000284646.1_1	AL031291.1	chr1	11371791	11379150	-	lncRNA	29.8652	65.827	70.333	34.0665	55.5823	94.2922	85.4321	42.5298	37.4789	7.76361	12.3516	25.1392	16.8623	14.6362	3.17839	3.08791	3.4033	27.7912	15.8361	14.4181	5.61231	2.18102	1.09051	2.24492	59.741	12.0672	60.7046	10.0576	0.202464	-2.30426	2.93657e-07	2.05801e-05
ENSG00000165304.7_3	MELK	chr9	36572859	36677680	+	protein_coding_gene	75.8117	35.2985	29.3796	70.137	123.516	29.665	123.516	35.9868	142.42	105.363	144.102	140.998	175.566	355.172	554.099	309.82	140.67	150.278	129.856	114.236	446.74	567.064	513.629	108.879	65.4139	256.181	53.0619	147.19	3.91682	1.96968	2.94819e-07	2.06277e-05
ENSG00000239257.1_2	RPL23AP1	chr6	29694446	29694916	-	pseudogene	82.7037	96.3554	109.506	143.28	83.3735	150.444	171.893	142.857	58.8954	33.2726	16.4688	45.9064	32.7327	54.6419	8.4757	26.7619	31.7641	14.4102	36.9509	112.018	37.0412	17.4481	11.9956	7.85723	122.551	34.165	126.181	32.2484	0.278837	-1.84251	2.9508e-07	2.06277e-05
ENSG00000065717.14_3	TLE2	chr19	2997636	3047633	-	protein_coding_gene	792.577	835.716	1230.38	534.043	795.651	826.381	698.896	688.11	235.582	237.345	266.589	224.067	390.809	403.96	474.639	134.839	341.464	465.245	654.558	337.163	438.883	487.457	346.781	170.614	800.22	350.625	794.114	344.123	0.438151	-1.1905	2.98244e-07	2.07964e-05
ENSG00000144712.11_3	CAND2	chr3	12837971	12913415	+	protein_coding_gene	185.318	150.734	335.64	272.532	444.659	192.822	331.435	285.713	109.224	118.672	132.78	104.929	204.331	74.1568	41.3191	74.1098	52.1839	189.392	174.197	92.0543	90.9194	100.327	59.9779	56.1231	274.857	104.669	279.123	96.1905	0.38107	-1.39187	2.98066e-07	2.07964e-05
ENSG00000279631.1_3	AL158211.5	chr10	22541001	22543518	+	protein_coding_gene	82.7037	99.2175	176.278	154.301	115.282	100.649	120.428	80.6976	49.258	42.1453	47.3479	54.6505	53.5626	32.1997	10.5946	20.586	45.3773	88.52	49.6197	58.7816	66.2253	40.3488	59.9779	19.0819	116.195	46.1423	107.965	48.303	0.397033	-1.33267	3.02373e-07	2.10578e-05
ENSG00000150676.12_4	CCDC83	chr11	85566144	85631064	+	protein_coding_gene	42.1176	13.3562	10.6835	28.0548	10.293	15.8919	15.4395	20.7196	41.7622	67.6543	23.674	44.8134	68.4411	48.7874	804.132	153.366	287.012	82.3442	79.1804	41.0362	34.7963	179.934	68.702	37.0412	19.5695	128.917	15.6657	68.0477	6.5742	2.71682	3.03648e-07	2.11201e-05
ENSG00000186160.4_3	CYP4Z1	chr1	47533160	47583991	+	protein_coding_gene	162.344	111.62	100.603	87.1703	176.011	123.957	107.047	158.124	52.4705	41.0362	18.5274	36.0693	141.842	28.2967	19.0703	26.7619	28.3608	56.6116	20.059	43.2544	32.5514	8.72406	10.9051	17.9594	128.36	36.4062	117.788	28.3288	0.283982	-1.81613	3.05047e-07	2.11908e-05
ENSG00000168453.14_3	HR	chr8	21971928	21990897	-	protein_coding_gene	312.436	73.4591	149.569	89.1742	222.329	115.481	137.926	50.1634	36.4081	34.3817	49.4065	29.5113	70.4249	39.0299	25.4271	24.7033	15.8821	88.52	67.5673	44.3635	56.1231	53.4349	18.5386	6.73477	143.817	41.2786	126.704	37.719	0.286997	-1.80089	3.06826e-07	2.12877e-05
ENSG00000171847.10_3	FAM90A1	chr12	8373856	8380214	-	protein_coding_gene	3.82888	17.1723	14.2447	7.0137	12.3516	20.1298	17.4981	11.9956	10.7083	4.43635	3.08791	2.18602	3.9676	2.92724	4.23785	3.08791	4.53773	4.11721	3.16722	4.43635	4.48985	5.45254	1.09051	1.12246	13.0293	3.94081	13.2981	4.0424	0.304688	-1.71459	3.08597e-07	2.13839e-05
ENSG00000231943.7_2	PGM5P4-AS1	chr2	114285145	114300249	-	lncRNA	14.5497	22.8963	35.6116	21.0411	17.4981	11.6541	14.4102	8.72406	8.56661	14.4181	3.08791	12.0231	6.9433	6.83023	2.11893	4.11721	5.67217	8.23442	3.16722	3.32726	2.24492	5.45254	3.27152	3.36739	18.2982	5.80268	16.0239	4.78487	0.315835	-1.66276	3.10988e-07	2.15226e-05
ENSG00000215549.1	AL138815.1	chr13	26442061	26455095	+	protein_coding_gene	13.0182	8.58613	10.6835	11.0215	4.11721	4.23785	6.17581	5.45254	34.2664	59.8907	240.857	41.5344	144.817	37.0784	20.1298	45.2893	66.9316	4.11721	1.05574	41.0362	17.9594	134.132	4.36203	113.369	7.91159	62.9267	7.38097	41.2853	7.91757	2.98506	3.147e-07	2.17524e-05
ENSG00000255549.2_3	ENPP7P6	chr8	12305522	12368787	-	pseudogene	88.0641	68.689	56.9786	76.1487	161.6	16.9514	33.967	121.046	22.4874	15.5272	11.3223	21.8602	39.676	25.3694	45.5569	27.7912	13.6132	30.8791	19.0033	36.5999	8.9797	4.36203	13.0861	11.2246	77.9307	21.7087	72.4189	20.4318	0.279018	-1.84157	3.25318e-07	2.24583e-05
ENSG00000236651.1_2	DLX2-AS1	chr2	172967734	172974710	+	lncRNA	3.0631	0.954014	0.890291	5.00979	1.0293	1.05946	1.0293	1.09051	9.63744	6.65453	20.586	9.83709	9.919	15.612	8.4757	18.5274	7.94103	3.08791	1.05574	17.7454	19.0819	47.9823	3.27152	11.2246	1.76572	13.165	1.04438	9.87805	7.35368	2.87847	3.26922e-07	2.2541e-05
ENSG00000171462.14_4	DLK2	chr6	43418090	43424370	-	protein_coding_gene	83.4695	134.516	269.758	76.1487	83.3735	171.633	143.073	79.6071	39.6206	9.98179	6.17581	46.9994	50.5869	40.0057	2.11893	7.20512	9.07546	45.2893	53.8427	33.2726	32.5514	13.0861	4.36203	3.36739	130.197	24.8463	108.993	22.8187	0.190985	-2.38847	3.33363e-07	2.29565e-05
ENSG00000088882.7_3	CPXM1	chr20	2774715	2781283	-	protein_coding_gene	203.696	230.871	123.75	287.562	320.113	229.903	168.806	65.4305	56.7538	36.5999	63.8167	52.4645	77.3682	62.4478	34.9623	16.4688	72.6037	56.6116	108.741	36.5999	30.3065	66.521	6.54305	1.12246	203.767	48.7457	216.8	54.5381	0.239327	-2.06295	3.33817e-07	2.29592e-05
ENSG00000107562.16_3	CXCL12	chr10	44865613	44881941	-	protein_coding_gene	1089.7	1078.99	963.295	1613.15	1659.24	1002.25	1403.97	567.064	677.833	527.926	430.248	327.903	694.33	377.614	103.827	447.746	443.563	576.409	822.421	510.18	506.23	439.475	254.088	537.659	1172.21	479.841	1084.34	476.988	0.409358	-1.28857	3.3764e-07	2.31934e-05
ENSG00000127418.14_3	FGFRL1	chr4	1003724	1020685	+	protein_coding_gene	437.258	435.984	600.056	411.804	293.351	455.569	536.266	357.687	323.39	931.634	1116.79	841.618	568.359	784.501	1895.38	1191.93	975.612	2018.46	2950.79	952.706	710.518	1953.1	1902.94	845.214	440.997	1247.68	436.621	964.159	2.82905	1.50032	3.38123e-07	2.31978e-05
ENSG00000168004.9_3	HRASLS5	chr11	63228876	63258666	-	protein_coding_gene	111.803	51.5168	89.9194	75.1468	108.077	72.0435	96.7544	68.702	43.9039	60.9998	21.6153	16.3952	44.6355	21.4664	3.17839	15.4395	11.3443	36.0256	19.0033	31.0545	10.1022	8.72406	4.36203	7.85723	84.2453	22.2567	82.5331	17.6992	0.264332	-1.91958	3.41523e-07	2.33732e-05
ENSG00000108381.10_3	ASPA	chr17	3375668	3406713	+	protein_coding_gene	1053.71	417.858	349.884	548.071	1626.3	387.763	374.666	207.196	261.282	145.29	203.802	142.091	205.323	62.4478	12.7136	41.1721	100.965	284.087	145.692	148.618	46.0209	46.8918	15.2671	33.6739	620.68	118.459	402.811	121.528	0.19087	-2.38934	3.41471e-07	2.33732e-05
ENSG00000186834.3_3	HEXIM1	chr17	43225869	43229468	+	protein_coding_gene	1732.95	2060.67	2978.02	2050	1395.73	2485.5	1982.44	3726.26	1126.51	1079.14	880.053	1074.43	969.086	895.736	1183.42	851.233	798.641	1616	2057.64	1395.23	918.174	1632.49	1190.83	1166.24	2301.45	1177.18	2055.34	1102.83	0.511515	-0.967152	3.52403e-07	2.4065e-05
ENSG00000222375.1	RN7SKP127	chr16	29742372	29742725	-	misc_RNA	6.89198	10.4942	22.2573	4.00783	6.17581	12.7136	4.11721	5.45254	5.35413	1.10909	1.0293	1.09301	3.9676	0.975748	3.17839	1.0293	2.26887	2.0586	1.05574	3.32726	1.12246	2.18102	1.09051	2.24492	9.01379	2.06787	6.53389	1.59053	0.227955	-2.13318	3.52499e-07	2.4065e-05
ENSG00000270933.1_3	AC010719.1	chr7	25988277	25989023	-	lncRNA	22.9733	98.2634	53.4175	71.139	55.5823	50.8542	48.3772	35.9868	122.074	146.4	242.915	168.324	182.51	239.058	594.359	208.948	167.896	55.5823	107.685	94.2725	85.3071	262.812	63.2494	185.206	54.5742	182.912	52.1358	168.11	3.35369	1.74575	3.5818e-07	2.44228e-05
ENSG00000120885.21_4	CLU	chr8	27454434	27472548	-	protein_coding_gene	10138.9	3166.37	6264.98	2643.16	14175.6	2429.35	4444.53	17405.6	1573.04	1429.61	1526.46	1195.75	2232.77	2281.3	472.521	730.805	564.948	1125.03	3217.89	768.598	1179.71	3901.84	4408.92	464.699	7583.55	1692.12	5354.75	1312.68	0.223132	-2.16403	3.63116e-07	2.47289e-05
ENSG00000175040.5_3	CHST2	chr3	142838173	142842856	+	protein_coding_gene	391.311	185.079	469.183	182.356	388.047	380.347	324.23	225.735	102.799	93.1634	57.6409	126.789	95.2224	118.065	34.9623	45.2893	34.033	240.857	159.417	57.6726	58.368	103.598	207.196	33.6739	318.286	98.0467	352.289	94.1929	0.308089	-1.69858	3.67591e-07	2.50029e-05
ENSG00000115596.3_3	WNT6	chr2	219724544	219738955	+	protein_coding_gene	14.5497	25.7584	39.1728	19.0372	26.7619	18.0109	10.293	11.9956	5.35413	14.4181	4.11721	6.55806	6.9433	10.7332	3.17839	4.11721	2.26887	16.4688	7.39017	4.43635	6.73477	6.54305	3.27152	5.61231	20.6974	6.7591	18.524	6.07768	0.326821	-1.61343	3.75292e-07	2.54955e-05
ENSG00000170369.3_3	CST2	chr20	23804406	23807368	-	protein_coding_gene	1.53155	7.63211	6.23204	4.00783	1.0293	12.7136	32.9377	1.09051	12.8499	36.5999	12.3516	62.3016	270.789	417.62	107.006	62.7874	18.1509	19.5567	13.7246	110.909	371.535	106.87	4.36203	8.9797	8.39682	102.275	5.11993	49.4507	12.2149	3.61057	3.75969e-07	2.55102e-05
ENSG00000104998.3_3	IL27RA	chr19	14142560	14164028	+	protein_coding_gene	232.03	149.78	161.143	180.352	174.981	103.827	267.619	308.614	101.728	88.727	73.0805	81.9758	121.012	88.793	92.1733	95.7251	58.9905	119.399	55.9542	100.927	161.635	101.417	81.7881	34.7963	197.293	91.1326	177.667	90.4832	0.462055	-1.11386	3.79172e-07	2.56961e-05
ENSG00000101773.18_3	RBBP8	chr18	20378224	20606451	+	protein_coding_gene	3553.96	2987.97	2684.23	3613.06	3285.53	2456.89	2232.56	3848.4	2184.49	1345.32	1445.14	2013.33	1864.77	1290.91	1762.95	2021.55	1587.07	2248	1443.2	2558.67	1749.92	2211.55	956.375	1441.24	3082.83	1757.78	3136.75	1756.43	0.570178	-0.810517	3.82019e-07	2.58574e-05
ENSG00000126218.11_3	F10	chr13	113777128	113803843	+	protein_coding_gene	489.33	128.792	160.252	342.669	401.428	174.811	224.388	95.9647	80.312	83.1816	123.516	73.2317	166.639	56.5934	21.1893	30.8791	65.7971	85.4321	90.7936	65.4362	76.3274	117.775	58.8874	15.7145	252.204	75.7316	199.6	74.7796	0.300264	-1.7357	3.83341e-07	2.59153e-05
ENSG00000104722.13_3	NEFM	chr8	24770525	24776611	+	protein_coding_gene	10.7209	2.86204	227.914	8.01566	5.14651	32.8434	56.6116	45.8013	8.56661	11.0909	5.14651	3.27903	15.8704	1.9515	2.11893	3.08791	17.0165	4.11721	8.44591	5.54544	7.85723	3.27152	3.27152	5.61231	48.7395	6.64059	21.7821	5.34597	0.136011	-2.8782	3.84941e-07	2.59918e-05
ENSG00000154342.5_3	WNT3A	chr1	228194752	228248961	+	protein_coding_gene	40.5861	113.528	111.286	61.1194	85.4321	66.7462	61.7581	47.9823	18.204	8.8727	8.23442	25.1392	34.7165	36.1027	3.17839	9.26372	19.2854	59.6995	28.505	17.7454	6.73477	6.54305	9.81457	6.73477	73.5548	18.6734	64.2522	13.78	0.254473	-1.97441	3.86434e-07	2.60608e-05
ENSG00000233822.4_3	HIST1H2BN	chr6	27805538	27833576	+	protein_coding_gene	262.661	393.054	408.643	507.992	425.102	400.477	545.53	348.962	576.105	709.816	540.384	444.855	736.982	1093.81	1367.77	734.922	792.969	739.039	1063.13	506.853	1070.83	887.673	1311.88	702.661	411.553	829.98	404.56	738.01	2.01724	1.01238	3.92545e-07	2.64408e-05
ENSG00000227695.5_3	DNMBP-AS1	chr10	101686767	101718138	+	as_lncRNA	44.415	106.85	89.0291	152.297	46.3186	65.6867	71.0219	129.77	283.769	312.763	290.263	219.695	286.659	603.988	273.341	247.033	410.665	368.49	146.748	23.2908	278.371	374.044	114.503	610.619	88.1736	302.765	80.0255	285.214	3.43564	1.78058	3.94232e-07	2.65221e-05
ENSG00000130700.6_3	GATA5	chr20	61038553	61051026	-	protein_coding_gene	67.3882	45.7927	59.6495	57.1116	119.399	25.4271	40.1428	16.3576	2.14165	15.5272	19.5567	3.27903	13.8866	12.6847	4.23785	1.0293	5.67217	21.6153	30.6164	3.32726	25.8166	10.9051	4.36203	5.61231	53.9086	11.2669	51.4521	8.28862	0.209103	-2.25772	3.99018e-07	2.68116e-05
ENSG00000266441.1_3	AP005205.2	chr18	6728820	6729861	-	as_lncRNA	6.1262	11.4482	15.1349	18.0352	9.26372	2.11893	9.26372	7.63355	47.1164	78.7452	63.8167	28.4183	18.8461	160.998	86.876	67.9339	15.8821	14.4102	15.8361	34.3817	28.0616	81.7881	3.27152	243.574	9.87806	61.8723	9.26372	40.749	6.2591	2.64596	4.00047e-07	2.68482e-05
ENSG00000169282.17_3	KCNAB1	chr3	155755490	156256927	+	protein_coding_gene	1121.86	2526.23	3103.55	2221.34	9965.7	2178.26	2203.74	2198.46	954.106	1560.49	837.852	612.086	1512.65	1368.97	252.152	546.559	647.761	1897	1057.85	1173.41	932.766	654.305	809.157	1034.91	3189.89	990.752	2212.54	943.436	0.310605	-1.68685	4.02608e-07	2.69874e-05
ENSG00000196338.12_4	NLGN3	chrX	70364681	70391051	+	protein_coding_gene	181.489	126.884	289.345	154.301	355.109	168.455	242.915	99.2362	87.8078	60.9998	85.4321	41.5344	149.777	56.5934	43.438	42.2014	79.4103	123.516	129.856	59.8907	95.4093	85.0596	31.6247	56.1231	202.217	76.7921	174.972	70.2051	0.379867	-1.39644	4.03992e-07	2.70475e-05
ENSG00000170509.11_3	HSD17B13	chr4	88224941	88244058	-	protein_coding_gene	1317.9	819.498	2718.95	34.0665	125.575	846.511	965.485	1100.32	150.987	21.0727	23.674	124.603	78.3601	61.4721	18.0109	40.1428	63.5283	478.626	13.7246	510.18	44.8985	26.1722	39.2583	39.2862	991.038	108.375	905.998	42.5206	0.109351	-3.19296	4.08438e-07	2.73121e-05
ENSG00000065534.18_3	MYLK	chr3	123328896	123603178	-	protein_coding_gene	47246	45965.3	76508	55409.2	90016.6	49003.3	56787.6	36983.5	31123.6	24313.4	15668	13550	29924.6	8860.76	3666.8	6277.71	16182.7	22706.4	36305.8	14148.6	19478.1	18001	3606.31	7203.96	57240	16938.6	52206.3	15925.4	0.295923	-1.7567	4.12e-07	2.75171e-05
ENSG00000088340.15_3	FER1L4	chr20	34146507	34195484	-	pseudogene	423.474	82.9992	98.8223	72.1409	118.37	132.433	99.8423	68.702	36.4081	39.9272	72.0512	41.5344	42.6517	25.3694	31.7839	64.846	18.1509	104.989	41.1738	32.1635	50.5108	23.9912	27.2627	20.2043	137.098	42.0636	99.3323	38.1676	0.306553	-1.70579	4.16115e-07	2.77585e-05
ENSG00000235984.5_3	GPC5-AS1	chr13	93353642	93373867	-	as_lncRNA	21.4417	25.7584	7.12233	111.217	2.0586	13.773	7.20512	14.1766	16.0624	103.145	144.102	13.1161	28.7651	12.6847	5537.81	1587.18	598.981	54.553	6.33443	505.744	246.942	153.762	283.532	538.782	25.3441	614.469	13.9748	148.932	24.2454	4.59964	4.1752e-07	2.78188e-05
ENSG00000274979.1_3	AC020656.2	chr12	69720354	69725662	-	lncRNA	7.65775	17.1723	13.3544	43.0842	15.4395	29.665	13.3809	6.54305	84.5953	26.6181	33.967	227.346	174.574	55.6176	1121.97	438.483	41.974	24.7033	67.5673	7.76361	11.2246	274.808	221.373	37.0412	18.2871	178.102	14.4102	61.5925	9.74818	3.28513	4.22859e-07	2.81069e-05
ENSG00000266094.7_3	RASSF5	chr1	206680863	206762780	+	protein_coding_gene	1737.54	773.705	1025.62	717.401	779.182	770.23	965.485	503.815	372.648	368.217	234.681	402.228	621.921	559.103	205.536	570.233	321.045	639.197	482.473	418.126	286.228	391.492	310.795	202.043	909.122	399.123	776.444	382.07	0.438982	-1.18777	4.22587e-07	2.81069e-05
ENSG00000164116.16_3	GUCY1A3	chr4	156587863	156653501	+	protein_coding_gene	11523.4	7986.05	12971.5	18095.3	7862.84	10380.6	14188.9	22257.3	57128.6	23327.4	77814.2	36986.4	70041	38552.8	28305.7	66899.5	39735.8	32397.3	39002.2	37794.4	32215.8	14565.9	21780.7	7546.31	13158.2	39005.9	12247.5	37390.4	2.96438	1.56773	4.26761e-07	2.83323e-05
ENSG00000135424.15_3	ITGA7	chr12	56078352	56109827	-	protein_coding_gene	917.399	1076.13	848.447	1215.37	1127.09	821.084	1150.76	526.715	540.767	659.907	413.779	252.485	512.812	297.603	99.5895	197.626	265.457	466.274	640.834	278.381	452.352	339.148	292.256	132.451	960.374	365.108	996.763	318.375	0.380182	-1.39524	4.28074e-07	2.83855e-05
ENSG00000158887.15_3	MPZ	chr1	161274525	161279762	-	protein_coding_gene	341.536	41.9766	91.7	36.0705	36.0256	50.8542	80.2856	69.7925	36.4081	14.4181	29.8498	12.0231	28.7651	25.3694	6.35678	8.23442	26.092	40.1428	55.9542	21.0727	12.3471	11.9956	14.1766	11.2246	93.5301	22.1519	60.3234	17.7454	0.236563	-2.0797	4.29144e-07	2.84225e-05
ENSG00000231056.1_3	LINC02522	chr6	10474733	10478735	-	lncRNA	8.42353	8.58613	17.8058	5.00979	4.11721	7.41624	11.3223	9.81457	2.14165	2.21818	1.0293	1.09301	1.9838	1.9515	1.05946	3.08791	1.13443	5.14651	2.11148	5.54544	1.12246	5.45254	3.27152	1.12246	9.06195	2.46698	8.50483	2.04764	0.270875	-1.8843	4.29995e-07	2.84449e-05
ENSG00000255026.1_3	AC136475.3	chr11	287305	288987	+	as_lncRNA	45.1807	5.72408	15.1349	16.0313	16.4688	34.9623	32.9377	109.051	14.9916	5.54544	2.0586	12.0231	13.8866	9.75748	3.17839	6.17581	5.67217	16.4688	8.44591	5.54544	4.48985	3.27152	4.36203	1.12246	34.4363	7.3122	24.7033	5.6088	0.213363	-2.22862	4.31409e-07	2.85044e-05
ENSG00000112562.18_3	SMOC2	chr6	168841831	169073984	+	protein_coding_gene	1324.79	2617.81	1201.89	3387.62	2973.65	1706.8	1555.28	789.528	5950.58	7240.12	22258.7	9470.93	7261.7	10942	7980.94	14073.6	2943.85	2858.37	6141.23	2191.56	4929.85	3594.31	2268.26	4301.27	1944.67	7150.46	1631.04	6045.91	3.67701	1.87853	4.33316e-07	2.85544e-05
ENSG00000184584.12_3	TMEM173	chr5	138855119	138862520	-	protein_coding_gene	577.394	235.641	404.192	186.364	277.912	278.639	417.897	560.521	160.624	114.236	80.2856	126.789	282.691	235.155	77.3408	117.34	91.8891	170.864	178.42	153.054	175.104	99.2362	128.68	38.1637	367.32	139.367	341.415	127.735	0.379512	-1.39778	4.33435e-07	2.85544e-05
ENSG00000148218.15_3	ALAD	chr9	116148597	116163613	-	protein_coding_gene	2023.18	2048.27	6255.18	1953.82	1758.05	2548.01	2112.13	4808.05	1190.76	621.089	704.043	695.155	1025.62	800.113	1783.08	774.035	543.393	1311.33	1992.18	651.034	809.295	2203.92	804.795	1144.91	2938.33	1065.92	2080.2	807.045	0.362768	-1.46288	4.33712e-07	2.85544e-05
ENSG00000198542.13_3	ITGBL1	chr13	102104944	102373206	+	protein_coding_gene	582.755	272.848	429.12	351.687	91.6079	514.899	537.296	171.21	415.481	710.925	265.56	1080.99	6204.33	1021.61	1023.44	3197.01	2570.63	1818.78	417.017	1159	3543.61	2374.04	1054.52	1223.48	368.928	1755.03	390.404	1119.99	4.75659	2.24993	4.40566e-07	2.89713e-05
ENSG00000248927.1_3	AC114284.1	chr5	120116913	120126473	+	lncRNA	18.3786	17.1723	15.1349	48.0939	116.311	28.6055	57.6409	33.8057	23.5582	34.3817	153.366	421.902	217.226	231.252	176.93	130.721	369.825	147.19	17.9476	87.6179	438.883	574.698	682.658	248.064	41.8929	247.264	31.2056	197.078	5.90867	2.56283	4.5153e-07	2.96571e-05
ENSG00000233760.1_3	AC004947.1	chr7	26591441	26596819	+	lncRNA	6.89198	31.4825	20.4767	4.00783	11.3223	44.4974	39.1135	8.72406	215.236	819.616	812.119	592.412	937.345	596.182	12.7136	8.23442	35.1674	16.4688	8.44591	25.509	1043.89	15.2671	21.8102	23.5717	20.8145	323.999	15.8995	30.3382	15.5758	3.96124	4.52552e-07	2.96614e-05
ENSG00000101977.19_4	MCF2	chrX	138663929	138790386	-	protein_coding_gene	137.84	151.688	137.995	220.431	468.333	85.8165	90.5786	381.678	96.3744	62.1089	59.6995	52.4645	93.2386	42.9329	18.0109	49.4065	27.2264	184.245	39.0623	25.509	20.2043	34.8962	33.8057	44.8985	209.295	55.2552	144.842	43.9157	0.264264	-1.91995	4.52667e-07	2.96614e-05
ENSG00000134569.9_3	LRP4	chr11	46878419	46940193	-	protein_coding_gene	737.441	480.823	664.157	489.957	747.273	428.023	400.399	248.636	198.103	215.163	121.458	190.184	324.351	120.017	119.719	255.267	167.896	416.867	291.384	236.236	141.43	304.252	80.6976	116.736	524.589	206.235	485.39	194.143	0.393105	-1.34701	4.56496e-07	2.9877e-05
ENSG00000115963.13_3	RND3	chr2	151324709	151395525	-	protein_coding_gene	8820.2	4835.9	4731.9	5244.24	4413.65	3494.11	3862.97	6567.04	3770.38	914.997	1005.63	1742.26	2984.63	1992.48	323.136	2192.41	1328.42	2808.97	1222.55	2604.14	1128.07	766.627	723.007	884.5	5246.25	1649.51	4783.9	1275.48	0.31442	-1.66923	4.57041e-07	2.98774e-05
ENSG00000198721.12_3	ECI2	chr6	4115923	4135831	-	protein_coding_gene	1826.37	2880.17	3568.29	2285.46	1795.1	2462.19	2009.2	2262.8	4347.55	4091.42	6080.09	3906.42	3679.95	4877.76	4933.92	5117.69	4904.15	3170.25	5061.21	3218.57	4305.76	7589.93	2324.96	8568.88	2386.2	4761.16	2274.13	4612.66	1.99526	0.996575	4.58941e-07	2.98959e-05
ENSG00000182511.11_3	FES	chr15	91426925	91439006	+	protein_coding_gene	785.685	534.248	488.77	430.842	412.75	505.364	614.493	547.435	212.024	201.854	301.586	213.137	266.821	400.057	85.8165	147.19	87.3513	299.527	358.951	149.727	202.043	176.662	189.748	55.0006	539.948	209.218	519.806	201.949	0.38757	-1.36747	4.58788e-07	2.98959e-05
ENSG00000117318.8_3	ID3	chr1	23884409	23886285	-	protein_coding_gene	3165.71	1774.47	6199.1	1500.93	858.438	4851.28	3012.77	4953.09	1595.53	982.652	299.527	626.295	1012.73	973.796	197.06	302.615	589.905	954.163	761.188	1202.25	2140.54	645.581	730.64	151.532	3289.47	822.875	3089.24	745.914	0.250151	-1.99913	4.58311e-07	2.98959e-05
ENSG00000086991.12_3	NOX4	chr11	89057524	89231355	-	protein_coding_gene	201.399	153.596	297.357	355.695	478.626	524.434	427.16	384.949	443.322	492.435	748.303	1585.96	9055.05	1428.49	492.65	1691.14	2450.38	2067.87	244.931	1120.18	3827.6	703.377	1643.4	1041.64	352.902	1814.8	370.322	1274.34	5.14321	2.36267	4.60063e-07	2.99338e-05
ENSG00000205913.6_3	SRRM2-AS1	chr16	2787077	2802601	-	as_lncRNA	71.2171	119.252	106.835	107.209	75.1391	95.3517	113.223	70.883	125.287	163.036	344.816	113.673	170.607	332.73	266.985	218.212	167.896	213.066	213.259	131.981	159.39	147.219	177.753	147.043	94.8888	193.309	101.093	169.251	2.03859	1.02757	4.65165e-07	3.02303e-05
ENSG00000257017.4	HP	chr16	72088491	72094954	+	protein_coding_gene	8.42353	2.86204	8.90291	1.00196	16.4688	5.29732	26.7619	1112.32	9.63744	3.32726	9.26372	6.55806	7.9352	24.3937	6.35678	5.14651	2.26887	4.11721	30.6164	5.54544	8.9797	1.09051	8.72406	12.3471	147.755	9.14425	8.66322	7.24663	0.0619749	-4.01217	4.6623e-07	3.0264e-05
ENSG00000149654.9_3	CDH22	chr20	44802372	44937137	-	protein_coding_gene	86.5326	59.1489	169.155	90.1761	48.3772	80.5192	123.516	150.49	39.6206	49.9089	30.8791	31.6973	65.4654	40.9814	12.7136	32.9377	27.2264	69.9926	46.4525	57.6726	44.8985	22.9007	31.6247	16.8369	100.989	38.863	88.3544	36.2791	0.385132	-1.37657	4.67773e-07	3.03287e-05
ENSG00000105131.7_3	EPHX3	chr19	15337730	15344246	-	protein_coding_gene	23.739	10.4942	24.0379	15.0294	8.23442	8.4757	19.5567	28.3532	4.28331	8.8727	4.11721	3.27903	4.9595	3.90299	1.05946	6.17581	5.67217	4.11721	3.16722	15.5272	4.48985	9.81457	5.45254	3.36739	17.2401	5.51614	17.293	4.38658	0.317561	-1.65489	4.71746e-07	3.05505e-05
ENSG00000130675.14_4	MNX1	chr7	156786745	156803345	-	protein_coding_gene	12.2524	4.77007	80.1262	38.0744	3.08791	30.7244	10.293	2.18102	25.6998	58.7816	91.6079	523.552	87.2872	43.9086	461.926	212.036	94.1579	108.077	26.3935	89.8361	319.902	1102.5	246.455	16.8369	22.6887	219.31	11.2727	92.8829	9.65426	3.27117	4.79026e-07	3.09655e-05
ENSG00000112041.12_3	TULP1	chr6	35465651	35480715	-	protein_coding_gene	16.0813	20.9883	23.1476	39.0763	53.5237	21.1893	30.8791	11.9956	10.7083	8.8727	17.4981	8.74408	3.9676	3.90299	2.11893	1.0293	5.67217	13.3809	12.6689	8.8727	1.12246	7.63355	2.18102	1.12246	27.1101	6.84351	22.1684	6.65286	0.253114	-1.98214	4.79272e-07	3.09655e-05
ENSG00000214264.4_2	KCTD9P4	chr11	112051496	112053914	+	pseudogene	196.038	208.929	169.155	269.526	204.831	169.514	151.307	263.903	143.491	125.327	128.663	123.51	99.19	77.0841	94.2922	92.6372	65.7971	101.901	134.079	92.0543	130.206	173.391	112.322	154.9	204.151	115.553	200.435	117.916	0.565973	-0.821195	4.8244e-07	3.11339e-05
ENSG00000240211.1_4	AC092849.1	chr7	100033827	100036127	+	as_lncRNA	25.2706	29.5744	26.7087	31.0607	17.4981	24.3677	31.9084	23.9912	52.4705	52.1271	53.5237	54.6505	63.4816	147.338	134.552	86.4614	43.1085	34.9963	46.4525	33.2726	56.1231	103.598	76.3355	39.2862	26.2975	67.3611	25.9897	54.0871	2.56303	1.35785	4.85661e-07	3.13054e-05
ENSG00000283706.1_1	PRSS50	chr3	46753605	46759397	-	protein_coding_gene	18.3786	14.3102	29.3796	16.0313	24.7033	13.773	9.26372	17.4481	6.42496	4.43635	3.08791	6.55806	13.8866	2.92724	1.05946	2.0586	3.4033	11.3223	8.44591	8.8727	3.36739	1.09051	1.09051	1.12246	17.911	4.94714	16.7397	3.38534	0.27712	-1.85142	4.8726e-07	3.13719e-05
ENSG00000128591.15_3	FLNC	chr7	128470431	128499328	+	protein_coding_gene	8085.82	2628.31	5350.65	2501.89	7424.36	2613.7	2962.33	1379.49	1468.1	2017.43	1217.66	697.341	1640.6	729.859	421.666	679.339	494.613	1071.5	3510.33	481.344	1046.13	1127.58	363.139	553.374	4118.32	1095	2795.32	887.997	0.265883	-1.91114	4.89024e-07	3.1449e-05
ENSG00000188505.4_3	NCCRP1	chr19	39687601	39692524	+	protein_coding_gene	78.1091	15.2642	22.2573	6.01174	18.5274	14.8325	9.26372	21.8102	2.14165	3.32726	1.0293	1.09301	3.9676	1.9515	2.11893	3.08791	6.8066	8.23442	6.33443	2.21818	20.2043	2.18102	4.36203	2.24492	23.2595	4.45644	16.8958	2.66642	0.189663	-2.39849	4.90291e-07	3.1494e-05
ENSG00000067445.20_4	TRO	chrX	54946895	54957864	+	protein_coding_gene	369.869	276.664	353.445	378.74	629.933	407.893	307.761	371.863	237.723	79.8543	104.989	86.3478	264.837	75.1326	23.3082	45.2893	127.057	215.124	182.643	95.3815	131.328	75.245	43.6203	28.0616	387.021	113.496	370.866	90.8647	0.293344	-1.76934	4.91847e-07	3.15573e-05
ENSG00000161249.20_4	DMKN	chr19	35988122	36004560	-	protein_coding_gene	408.158	560.006	647.241	425.832	337.611	811.549	590.819	502.724	191.678	115.345	60.7288	127.882	222.186	279.064	18.0109	39.1135	38.5707	196.597	129.856	337.163	70.7151	49.0728	90.5121	16.8369	535.493	123.958	531.365	102.929	0.231544	-2.11064	4.96089e-07	3.17927e-05
ENSG00000267288.2_3	AC138150.2	chr17	43246167	43248951	-	as_lncRNA	8.42353	4.77007	13.3544	5.00979	6.17581	9.53517	5.14651	9.81457	3.21248	2.21818	1.0293	1.09301	2.9757	1.9515	1.05946	3.08791	1.13443	1.0293	2.11148	6.65453	1.12246	1.09051	2.18102	1.12246	7.77873	2.06711	7.29967	1.54296	0.264709	-1.91752	4.99446e-07	3.1964e-05
ENSG00000143546.9_3	S100A8	chr1	153362508	153363664	-	protein_coding_gene	2726.16	69.643	32.9408	220.431	46.3186	184.347	129.692	810.247	162.766	69.8725	46.3186	126.789	72.4087	90.7445	29.665	181.157	49.9151	59.6995	30.6164	66.5453	50.5108	30.5342	19.6291	15.7145	527.472	68.9304	157.019	55.1052	0.130669	-2.93601	4.99915e-07	3.1964e-05
ENSG00000112763.15_3	BTN2A1	chr6	26458132	26476849	+	protein_coding_gene	887.533	1012.21	1262.43	959.875	1188.84	1057.34	1035.48	1285.71	689.612	668.78	837.852	707.178	932.386	839.143	788.241	487.889	519.57	815.207	850.926	698.725	670.11	577.969	527.806	560.109	1086.18	698.219	1046.41	694.169	0.643028	-0.637046	5.06312e-07	3.23357e-05
ENSG00000265369.3_2	PCAT18	chr18	24267585	24283602	-	lncRNA	116.398	1191.56	97.0417	2210.32	1634.53	348.563	184.245	224.645	12241.7	11212.9	8055.32	7617.19	5903.79	2513.53	4192.3	5101.22	1764.04	137.926	5498.29	23.2908	9362.46	8894.18	10569.2	14882.7	750.913	6748.13	286.604	6760.49	8.98683	3.16781	5.15006e-07	3.28531e-05
ENSG00000188372.14_3	ZP3	chr7	76026835	76071388	+	protein_coding_gene	103.38	113.528	123.75	124.243	68.9632	80.5192	141.014	43.6203	214.165	159.709	247.033	179.254	133.906	180.513	808.37	797.709	422.009	291.293	156.249	79.8543	270.513	592.146	572.517	599.395	99.8772	356.54	108.454	258.773	3.56839	1.83527	5.24341e-07	3.33651e-05
ENSG00000177410.12_3	ZFAS1	chr20	47894715	47912275	+	as_lncRNA	3415.36	3512.68	4008.09	3399.64	2779.12	3610.65	4053.39	4333.68	8750.79	5116.22	8225.15	5400.56	7380.73	5835.95	4545.1	6961.17	5808.3	4817.13	5395.88	4495.13	5100.47	4331.5	5356.57	8002.03	3639.08	5970.17	3561.66	5398.22	1.64061	0.714229	5.24838e-07	3.33651e-05
ENSG00000162390.17_3	ACOT11	chr1	55007930	55104865	+	protein_coding_gene	1010.82	923.486	1780.58	533.041	1609.83	1183.42	962.398	539.801	376.931	374.872	347.904	252.485	783.601	362.978	51.9137	147.19	154.283	662.871	198.479	308.326	218.88	116.684	149.4	70.7151	1067.92	286.095	986.61	235.683	0.267936	-1.90004	5.247e-07	3.33651e-05
ENSG00000228223.3_3	HCG11	chr6	26521937	26527632	+	lncRNA	843.118	1324.17	1968.43	1260.46	1294.86	1100.78	1493.52	1287.89	714.241	547.889	832.706	533.389	653.662	587.4	115.481	390.106	351.674	701.984	540.538	700.943	474.801	346.781	149.4	184.084	1321.65	489.068	1291.38	536.964	0.370074	-1.43411	5.26153e-07	3.34104e-05
ENSG00000079435.9_3	LIPE	chr19	42905659	42931578	-	protein_coding_gene	183.02	82.0452	100.603	45.0881	80.2856	52.9732	84.4028	118.865	21.4165	37.709	33.967	22.9532	29.757	37.0784	84.757	23.674	11.3443	32.9377	40.1181	22.1818	15.7145	40.3488	43.6203	7.85723	93.4104	31.5897	83.224	31.3473	0.338068	-1.56462	5.2913e-07	3.3561e-05
ENSG00000169679.14_3	BUB1	chr2	111395275	111435691	-	protein_coding_gene	49.7754	57.2408	93.4805	81.1585	137.926	79.4597	153.366	58.8874	130.641	117.563	179.099	135.533	220.202	327.851	578.467	504.358	157.686	242.915	164.695	133.091	426.536	565.974	429.66	162.757	88.9119	279.814	80.3091	199.65	3.14907	1.65493	5.33965e-07	3.3829e-05
ENSG00000226145.7_2	KRT16P6	chr17	16721297	16725893	-	pseudogene	24.5048	8.58613	4.45145	1.00196	9.26372	16.9514	2.0586	53.4349	1.07083	2.21818	2.0586	5.46505	2.9757	0.975748	2.11893	1.0293	4.53773	3.08791	4.22296	1.10909	1.12246	2.18102	1.09051	3.36739	15.0316	2.41446	8.92492	2.14997	0.160575	-2.63868	5.34595e-07	3.38302e-05
ENSG00000185792.9_3	NLRP9	chr19	56219798	56249768	-	protein_coding_gene	75.8117	101.125	40.0631	41.0802	49.4065	45.5569	177.04	1131.95	131.712	8.8727	5.14651	10.9301	41.6598	6.83023	2.11893	6.17581	9.07546	23.674	10.5574	27.7272	4.48985	1.09051	5.45254	3.36739	207.754	18.68	62.6091	7.85147	0.0899716	-3.47439	5.40156e-07	3.41431e-05
ENSG00000237670.1_2	LINC01866	chr2	17151301	17155764	+	lncRNA	6.89198	8.58613	1.78058	20.0391	6.17581	2.11893	4.11721	3.27152	4.28331	16.6363	8.23442	163.952	37.6922	6.83023	430.142	327.318	32.8986	28.8205	9.50165	2.21818	25.8166	331.514	53.4349	6.73477	6.62266	92.8767	5.14651	27.3185	14.0181	3.80922	5.49248e-07	3.46783e-05
ENSG00000247317.3_3	AC105202.1	chr8	144063155	144099854	-	lncRNA	65.0909	55.3328	103.274	89.1742	257.326	77.3408	80.2856	98.1457	43.9039	49.9089	49.4065	34.9763	49.595	28.2967	7.41624	18.5274	30.6297	63.8167	38.0066	43.2544	19.0819	25.0817	53.4349	22.4492	103.246	36.1116	84.7299	36.4915	0.350135	-1.51402	5.50739e-07	3.47329e-05
ENSG00000241293.1_2	PPATP1	chr3	87100342	87101888	-	pseudogene	102.614	135.47	133.544	127.249	67.9339	99.5895	114.253	86.1501	177.757	161.927	201.743	182.533	145.809	152.217	436.499	284.087	285.877	127.633	195.312	249.545	176.227	227.916	246.455	387.249	108.35	227.424	108.433	198.527	2.09733	1.06856	5.6067e-07	3.5319e-05
ENSG00000090006.17_3	LTBP4	chr19	41098789	41135723	+	protein_coding_gene	3857.98	1469.18	1920.36	2272.44	2646.34	1508.68	2022.58	1085.06	808.474	1002.62	1311.33	665.643	838.155	637.163	565.753	576.409	522.974	1089	1975.29	617.762	527.557	1056.7	358.777	464.699	2097.82	813.644	1971.47	651.403	0.387839	-1.36647	5.68923e-07	3.57577e-05
ENSG00000173641.17_4	HSPB7	chr1	16340523	16346089	-	protein_coding_gene	255.003	132.608	193.193	100.196	274.824	132.433	152.337	91.6026	47.1164	69.8725	49.4065	31.6973	77.3682	59.5206	29.665	25.7326	40.8396	69.9926	81.2919	27.7272	168.369	77.426	56.7064	46.0209	166.524	59.9221	142.472	53.0565	0.35956	-1.4757	5.68435e-07	3.57577e-05
ENSG00000166592.11_3	RRAD	chr16	66955582	66959547	-	protein_coding_gene	263.427	75.3671	56.9786	63.1233	50.4358	95.3517	59.6995	43.6203	34.2664	23.2908	17.4981	34.9763	34.7165	36.1027	30.7244	28.8205	22.6887	28.8205	60.1771	27.7272	48.2659	42.5298	29.4437	20.2043	88.5004	32.5158	61.4114	30.0841	0.366278	-1.44899	5.75304e-07	3.61177e-05
ENSG00000234918.1_4	AL157387.1	chr10	37529815	37530977	+	lncRNA	0.765775	0.954014	0.890291	2.00391	1.0293	1.05946	1.0293	1.09051	1.07083	1.10909	1.0293	1.09301	2.9757	2.92724	1.05946	3.08791	1.13443	2.0586	1.05574	1.10909	757.662	124.318	3.27152	379.392	1.10282	80.2721	1.0293	1.59652	72.9644	6.18912	5.76422e-07	3.61231e-05
ENSG00000255491.2_4	AC100858.3	chr8	125823468	125869758	-	lncRNA	83.4695	87.7693	67.6621	88.1722	97.7837	77.3408	100.872	54.5254	38.5497	19.9636	14.4102	33.8833	40.6679	21.4664	10.5946	12.3516	18.1509	58.6702	30.6164	76.5271	41.5311	22.9007	14.1766	21.3268	82.1993	29.7367	85.6194	22.1836	0.361656	-1.46731	5.76692e-07	3.61231e-05
ENSG00000168032.8_3	ENTPD3	chr3	40428647	40470110	+	protein_coding_gene	329.283	278.572	441.584	243.476	308.791	256.39	318.054	824.424	192.749	75.418	78.227	116.952	206.315	211.737	86.876	121.458	153.148	168.806	122.466	160.818	89.797	344.6	111.232	117.859	375.072	147.404	313.423	121.962	0.393135	-1.3469	5.7906e-07	3.61896e-05
ENSG00000161649.12_3	CD300LG	chr17	41924516	41940997	+	protein_coding_gene	23.739	37.2065	23.1476	23.045	56.6116	5.29732	11.3223	6.54305	9.63744	6.65453	5.14651	5.46505	1.9838	9.75748	5.29732	1.0293	4.53773	14.4102	4.22296	8.8727	5.61231	6.54305	3.27152	3.36739	23.3641	5.98808	23.0963	5.38118	0.256112	-1.96515	5.78715e-07	3.61896e-05
ENSG00000092295.11_3	TGM1	chr14	24718320	24733638	-	protein_coding_gene	69.6855	191.757	88.1388	57.1116	81.3149	145.146	270.706	305.342	94.2327	47.6908	47.3479	42.6274	44.6355	97.5748	20.1298	26.7619	39.7052	73.0805	48.564	34.3817	30.3065	22.9007	22.9007	10.1022	151.15	43.9339	116.643	41.1663	0.291121	-1.78031	5.79736e-07	3.6191e-05
ENSG00000054277.13_3	OPN3	chr1	241753404	241840678	-	protein_coding_gene	1203.8	1408.12	1658.61	1495.92	1087.97	1499.14	1275.31	1111.23	2346.18	1476.2	2520.76	1862.49	2336.92	1694.87	2371.08	2066.84	2296.09	1420.44	1807.43	2150.52	3247.28	3261.71	2403.48	2690.54	1342.51	2247.05	1341.72	2316.5	1.67366	0.743008	5.83532e-07	3.63462e-05
ENSG00000139144.9_3	PIK3C2G	chr12	18400548	18801350	+	protein_coding_gene	883.705	766.073	527.942	1895.7	4078.1	478.877	375.695	1832.05	197.032	130.872	215.124	177.068	383.865	104.405	22.2487	129.692	99.8301	1226.93	146.748	143.072	170.614	35.9868	41.4393	46.0209	1354.77	204.434	824.889	136.972	0.150924	-2.7281	5.83141e-07	3.63462e-05
ENSG00000261701.6_3	HPR	chr16	72097123	72111145	+	protein_coding_gene	9.95508	1.90803	5.34175	8.01566	162.63	3.17839	8.23442	77.426	4.28331	5.54544	1.0293	1.09301	1.9838	0.975748	1.05946	3.08791	1.13443	1.0293	4.22296	1.10909	4.48985	3.27152	17.4481	1.12246	34.5861	3.30536	8.12504	1.55912	0.0954786	-3.38868	5.91281e-07	3.67875e-05
ENSG00000183605.16_3	SFXN4	chr10	120900279	120925179	-	protein_coding_gene	702.982	989.312	945.489	1075.1	749.332	980.003	1041.65	995.634	1794.7	1496.16	1641.74	1438.4	1158.54	1701.7	1468.42	2921.16	1221.78	1720.99	1141.25	1416.3	1134.81	2320.6	1752.45	2354.93	934.938	1667.75	984.658	1568.95	1.78402	0.835135	6.05111e-07	3.76057e-05
ENSG00000141429.13_3	GALNT1	chr18	33161081	33291798	+	protein_coding_gene	6033.54	9114.65	9658.77	10206.9	8772.74	7921.61	7450.09	9065.39	15746.5	10346.7	11389.2	15585.2	13935.2	11114.7	12318.4	10008.9	13718.7	14315.5	10933.2	13113.9	9950.63	12237.7	16944.3	13478.5	8527.97	12821.1	8919.07	12716.1	1.50344	0.588271	6.05874e-07	3.76103e-05
ENSG00000185610.6_3	DBX2	chr12	45408455	45444882	-	protein_coding_gene	38.2888	24.8044	27.599	22.0431	26.7619	12.7136	26.7619	14.1766	14.9916	12.2	11.3223	6.55806	7.9352	10.7332	5.29732	8.23442	2.26887	17.4981	3.16722	11.0909	7.85723	7.63355	15.2671	11.2246	24.1436	9.57998	25.7831	9.48382	0.3946	-1.34154	6.0654e-07	3.76103e-05
ENSG00000102265.11_3	TIMP1	chrX	47441712	47446188	+	protein_coding_gene	6803.15	3766.45	2937.07	3706.24	3814.59	2433.59	2793.53	6071.95	1684.41	604.453	777.123	676.573	2627.54	1072.35	645.213	927.401	1100.4	1013.86	1908.78	1034.78	3141.77	2263.89	694.653	336.739	4040.82	1281.87	3736.34	1024.32	0.317229	-1.6564	6.10853e-07	3.78109e-05
ENSG00000255399.3_3	TBX5-AS1	chr12	114845996	114850636	+	as_lncRNA	74.2802	88.7233	22.2573	39.0763	256.296	23.3082	31.9084	11.9956	20.3457	22.1818	11.3223	18.5812	4.9595	7.80598	3.17839	7.20512	4.53773	10.293	23.2263	24.3999	3.36739	13.0861	9.81457	31.4289	68.4807	13.4834	35.4923	10.8077	0.196632	-2.34643	6.11141e-07	3.78109e-05
ENSG00000161714.11_3	PLCD3	chr17	43186335	43210721	-	protein_coding_gene	591.178	272.848	428.23	156.305	216.153	318.898	306.732	234.459	85.6661	97.5997	71.0219	67.7666	119.028	127.823	152.563	59.6995	83.948	154.395	237.541	78.7452	207.655	136.313	191.929	53.8782	315.601	120.348	289.79	108.314	0.381146	-1.39158	6.1394e-07	3.79417e-05
ENSG00000273451.1_4	AL031666.3	chr20	45976881	45977886	-	lncRNA	7.65775	10.4942	16.9155	14.0274	19.5567	15.8919	20.586	15.2671	10.7083	35.4908	57.6409	51.3715	77.3682	47.8116	33.9028	49.4065	44.2429	29.8498	25.3377	46.5817	34.7963	17.4481	57.7969	23.5717	15.0496	40.2079	15.5795	39.8668	2.689	1.42707	6.15882e-07	3.80194e-05
ENSG00000124610.4_2	HIST1H1A	chr6	26017313	26017960	-	protein_coding_gene	79.6406	98.2634	146.008	125.245	132.78	202.357	286.146	62.1589	94.2327	64.3271	30.8791	22.9532	43.6436	44.8844	15.8919	21.6153	52.1839	36.0256	29.5607	70.9816	97.6542	33.8057	13.0861	17.9594	141.575	43.1053	129.012	34.9157	0.304421	-1.71586	6.25324e-07	3.85593e-05
ENSG00000130234.10_3	ACE2	chrX	15579156	15620271	-	protein_coding_gene	130.182	33.3905	62.3204	45.0881	89.5493	44.4974	44.26	417.664	37.4789	21.0727	40.1428	24.0462	40.6679	30.2482	24.3677	49.4065	18.1509	26.7619	16.8918	38.8181	12.3471	39.2583	29.4437	29.184	108.369	29.8929	53.7042	29.3139	0.27623	-1.85606	6.27472e-07	3.86488e-05
ENSG00000175785.12_3	PRIMA1	chr14	94184644	94254827	-	protein_coding_gene	277.976	130.7	412.205	206.403	339.67	325.255	336.582	429.66	146.703	96.4906	96.7544	96.1849	83.3196	34.1512	5.29732	41.1721	35.1674	155.425	154.138	76.5271	33.6739	35.9868	129.77	15.7145	307.306	77.2797	330.919	79.9233	0.251527	-1.99122	6.28819e-07	3.86888e-05
ENSG00000136628.17_3	EPRS	chr1	220141943	220220000	-	protein_coding_gene	4614.56	6028.41	7405.44	7082.83	5461.48	6138.53	5710.57	5149.38	7766.7	6388.35	13449.9	9897.21	8234.75	8909.55	12572.6	12718.1	12873.5	6630.77	8518.76	9971.81	7439.68	11892	12829.8	12277.5	5948.9	10148.2	5869.49	9934.51	1.7059	0.77053	6.32984e-07	3.89019e-05
ENSG00000163220.10_3	S100A9	chr1	153330330	153333503	+	protein_coding_gene	5986.06	240.412	104.164	707.382	213.066	468.283	466.274	1914.93	411.197	196.309	156.454	277.625	158.704	346.39	136.671	537.296	142.939	202.773	126.689	192.981	227.86	116.684	75.245	43.776	1262.57	209.349	467.278	175.843	0.165805	-2.59244	6.33787e-07	3.8908e-05
ENSG00000101955.14_3	SRPX	chrX	38008589	38080177	-	protein_coding_gene	961.048	322.457	622.313	491.961	726.687	549.861	373.637	474.371	218.449	112.018	238.798	119.138	253.926	116.114	156.801	65.8753	183.778	326.289	326.223	281.708	46.0209	95.9647	52.3444	309.8	565.292	181.453	520.911	170.289	0.320966	-1.63951	6.34808e-07	3.89276e-05
ENSG00000214870.8_3	AC004540.1	chr7	26438213	26533876	+	lncRNA	192.975	400.686	412.205	317.62	530.091	189.644	150.278	296.618	931.619	863.979	2926.31	1729.14	4297.9	1419.71	199.179	844.028	1168.47	1077.68	279.771	706.489	644.293	405.669	1226.82	1311.04	311.265	1252.01	307.119	1004.65	4.02253	2.0081	6.38364e-07	3.91025e-05
ENSG00000170989.8_3	S1PR1	chr1	101702444	101707074	+	protein_coding_gene	1383.76	388.284	327.627	406.795	847.116	239.439	488.919	868.044	160.624	177.454	109.106	127.882	241.032	231.252	239.439	173.952	122.519	248.062	275.548	188.545	252.554	326.062	420.936	51.6333	618.747	209.162	447.857	209.899	0.338003	-1.56489	6.49839e-07	3.97614e-05
ENSG00000198848.12_3	CES1	chr16	55836763	55867249	-	protein_coding_gene	1476.41	492.271	980.21	1357.65	1862.01	614.489	812.119	813.519	833.103	282.817	212.036	217.509	543.561	116.114	134.552	160.571	167.896	603.171	264.991	165.254	253.676	476.552	62.1589	130.206	1051.09	289.011	896.864	214.773	0.274973	-1.86264	6.53044e-07	3.98695e-05
ENSG00000175164.13_3	ABO	chr9	136125788	136150630	-	protein_coding_gene	243.516	729.821	448.707	200.391	751.391	437.558	304.673	255.179	97.4452	164.145	46.3186	142.091	179.534	63.4236	5.29732	31.9084	27.2264	293.351	82.3476	42.1453	33.6739	19.6291	44.7108	19.0819	421.405	80.7706	371.116	45.5147	0.191731	-2.38284	6.52365e-07	3.98695e-05
ENSG00000011465.16_3	DCN	chr12	91534261	91576900	-	protein_coding_gene	24167.1	13693.9	16893.3	24174.2	23601.9	12761.2	15902.7	17511.4	9679.2	7766.94	10868.4	6273.88	8967.77	7962.1	2470.67	4749.2	11981.9	8415.58	8107.02	8856.07	14533.6	6646.64	2973.81	7062.53	18588.2	7957.21	17202.3	8034.56	0.428076	-1.22406	6.53932e-07	3.98798e-05
ENSG00000111247.14_3	RAD51AP1	chr12	4647964	4669214	+	protein_coding_gene	114.866	269.986	157.581	246.481	216.153	175.871	197.626	86.1501	349.089	298.345	395.252	283.09	216.234	449.82	597.537	431.278	232.559	376.725	287.161	330.508	628.579	521.263	343.51	399.596	183.089	383.784	186.748	362.907	2.09662	1.06807	6.56835e-07	4.00128e-05
ENSG00000149451.17_3	ADAM33	chr20	3648612	3662893	-	protein_coding_gene	639.422	294.79	494.111	319.624	810.061	401.537	352.021	330.424	153.128	168.581	223.359	91.8129	211.275	104.405	33.9028	68.9632	103.233	341.728	220.649	92.0543	194.186	76.3355	34.8962	46.0209	455.249	135.283	376.779	103.819	0.297202	-1.75048	6.61252e-07	4.02376e-05
ENSG00000134940.13_3	ACRV1	chr11	125541417	125551018	-	protein_coding_gene	13.784	9.54014	14.2447	5.00979	7.20512	10.5946	8.23442	15.2671	46.0455	17.7454	22.6446	30.6043	45.6274	55.6176	24.3677	18.5274	66.9316	10.293	45.3968	78.7452	51.6333	16.3576	262.812	24.6942	10.485	51.1277	10.0674	38.0005	4.86567	2.28264	6.63107e-07	4.03063e-05
ENSG00000133800.8_3	LYVE1	chr11	10578513	10633236	-	protein_coding_gene	3290.54	1996.75	3124.92	1724.37	5646.75	2043.7	2763.68	3388.21	1077.25	1465.1	1016.95	761.828	2083.98	679.12	287.114	442.6	875.782	1679.82	1966.84	861.761	1553.49	890.945	594.327	597.15	2997.36	1052.13	2944.3	883.364	0.351024	-1.51036	6.64897e-07	4.03522e-05
ENSG00000262655.3_3	SPON1	chr11	13984236	14289430	+	protein_coding_gene	4629.88	1162.94	1159.16	2125.15	9688.82	825.322	1822.89	806.976	472.234	867.307	363.344	589.133	1492.81	492.753	166.336	577.439	724.903	1515.13	612.329	765.271	828.377	593.236	306.433	377.147	2777.64	671.511	1492.92	591.184	0.241758	-2.04836	6.65319e-07	4.03522e-05
ENSG00000267082.1_4	AC011472.1	chr19	11314304	11326844	+	as_lncRNA	61.262	69.643	86.3582	76.1487	76.1684	83.6976	96.7544	32.7152	53.5413	36.5999	44.26	24.0462	41.6598	36.1027	14.8325	18.5274	28.3608	32.9377	51.7312	51.018	21.3268	28.3532	30.5342	22.4492	72.8434	33.5176	76.1586	31.7359	0.460404	-1.11903	6.70602e-07	4.06282e-05
ENSG00000271723.5_3	MROH7-TTC4	chr1	55107459	55207981	+	protein_coding_gene	2003.27	2419.38	2850.71	1783.48	3086.88	2620.05	2273.73	1814.6	1503.44	1462.89	1448.23	1484.31	1936.19	1829.53	1723.75	1317.51	1281.91	2034.93	1367.18	1621.49	1315.53	1449.28	1011.99	1431.14	2356.51	1513.71	2346.55	1456.09	0.6424	-0.638457	6.75386e-07	4.08734e-05
ENSG00000132535.18_3	DLG4	chr17	7093209	7123021	-	protein_coding_gene	323.923	215.607	414.876	207.405	463.186	274.401	348.933	368.592	116.72	129.763	122.487	97.2779	188.461	317.118	95.3517	89.5493	111.174	185.274	144.636	221.818	133.573	107.96	145.038	50.5108	327.115	141.045	336.428	126.125	0.431397	-1.21291	6.77812e-07	4.09755e-05
ENSG00000253520.1_3	AC136628.3	chr5	178954225	178954514	-	pseudogene	23.739	22.8963	23.1476	22.0431	57.6409	15.8919	21.6153	17.4481	9.63744	8.8727	6.17581	16.3952	15.8704	13.6605	6.35678	4.11721	9.07546	13.3809	11.6131	6.65453	8.9797	11.9956	13.0861	4.48985	25.5528	10.0226	22.4697	9.35645	0.393304	-1.34628	6.88459e-07	4.15738e-05
ENSG00000250889.2_2	LINC01336	chr5	74343544	74348668	-	lncRNA	126.353	56.2868	56.0883	39.0763	136.897	55.0921	49.4065	87.2406	19.2749	31.0545	20.586	28.4183	59.514	15.612	4.23785	29.8498	18.1509	44.26	26.3935	29.9454	24.6942	14.1766	7.63355	11.2246	75.8051	24.0641	56.1876	22.6401	0.317656	-1.65446	6.89223e-07	4.15746e-05
ENSG00000162881.6_3	OXER1	chr2	42989621	42991401	-	protein_coding_gene	19.1444	8.58613	23.1476	12.0235	31.9084	21.1893	28.8205	17.4481	12.8499	7.76361	6.17581	4.37204	12.8947	2.92724	5.29732	3.08791	1.13443	13.3809	8.44591	5.54544	1.12246	5.45254	2.18102	1.12246	20.2835	5.85961	20.1668	5.37493	0.290842	-1.78169	6.94297e-07	4.18351e-05
ENSG00000163431.12_3	LMOD1	chr1	201865580	201915716	-	protein_coding_gene	7988.57	5726.95	10514.3	4666.11	13048.5	5328.04	6152.14	5050.14	2608.53	2446.65	1875.39	1330.19	3851.55	1296.77	499.007	733.892	1294.39	2680.3	5390.6	1629.25	3983.62	2703.37	597.598	905.827	7309.34	2114.18	5939.54	1752.32	0.289244	-1.78964	6.96679e-07	4.19331e-05
ENSG00000138180.15_3	CEP55	chr10	95256389	95288849	+	protein_coding_gene	25.2706	32.4365	16.0252	52.1018	49.4065	28.6055	97.7837	26.1722	80.312	67.6543	74.1098	84.1618	67.4492	169.78	406.834	270.706	114.578	114.253	62.2886	69.8725	381.637	316.247	331.514	76.3274	40.9752	167.983	30.521	99.2072	4.10414	2.03708	7.00407e-07	4.21118e-05
ENSG00000163221.8_3	S100A12	chr1	153346182	153348125	-	protein_coding_gene	294.058	5.72408	5.34175	16.0313	3.08791	9.53517	6.17581	230.097	16.0624	2.21818	4.11721	16.3952	9.919	7.80598	1.05946	16.4688	4.53773	4.11721	2.11148	2.21818	3.36739	9.81457	1.09051	2.24492	71.2564	6.47176	7.85549	4.11721	0.0908721	-3.46002	7.08396e-07	4.2546e-05
ENSG00000126603.8_3	GLIS2	chr16	4364762	4389598	+	protein_coding_gene	227.435	162.182	221.682	125.245	133.809	183.287	263.501	136.313	95.3035	73.1998	72.0512	53.5575	108.117	86.8415	24.3677	56.6116	77.1414	74.1098	99.2395	115.345	122.348	55.6159	39.2583	19.0819	181.682	73.2619	172.735	73.6548	0.403169	-1.31054	7.21754e-07	4.33014e-05
ENSG00000234527.1_3	PCDH9-AS1	chr13	66878003	66897693	+	as_lncRNA	22.2075	1.90803	72.1136	6.01174	2.0586	61.4489	7.20512	14.1766	5.35413	6.65453	3.08791	3.27903	6.9433	6.83023	1.05946	2.0586	2.26887	2.0586	1.05574	2.21818	3.36739	6.54305	4.36203	1.12246	23.3912	3.64147	10.6909	3.18347	0.155839	-2.68187	7.23818e-07	4.33782e-05
ENSG00000185215.8_3	TNFAIP2	chr14	103589779	103603776	+	protein_coding_gene	2249.08	697.384	1197.44	1874.66	1682.91	808.37	1630.41	629.223	252.715	648.816	228.505	670.015	606.051	584.473	582.705	585.673	263.188	782.27	658.781	649.925	575.823	500.543	399.126	145.92	1346.19	508.408	1413.93	583.589	0.377653	-1.40487	7.26134e-07	4.347e-05
ENSG00000164294.13_3	GPX8	chr5	54455946	54462899	+	protein_coding_gene	683.071	829.038	1169.84	1014.98	1291.77	970.468	1108.56	1051.25	476.518	384.853	283.058	410.972	507.853	543.491	319.958	261.443	517.301	535.237	367.397	540.126	1144.91	592.146	269.355	268.268	1014.87	463.931	1033.12	443.745	0.457135	-1.12931	7.33674e-07	4.3874e-05
ENSG00000117594.9_3	HSD11B1	chr1	209859523	209908295	+	protein_coding_gene	1201.5	318.641	236.817	489.957	1458.52	109.125	284.087	411.121	245.219	279.49	283.058	191.277	147.793	120.993	82.6381	115.282	114.578	223.359	138.302	122	108.879	91.6026	40.3488	193.063	563.721	156.118	364.881	130.151	0.27691	-1.85251	7.36624e-07	4.40029e-05
ENSG00000124107.5_3	SLPI	chr20	43880880	43883205	-	protein_coding_gene	1240.56	746.993	621.423	329.644	323.201	431.201	958.28	27804.7	184.182	358.235	53.5237	725.759	100.182	688.878	11.6541	86.4614	81.6792	200.714	82.3476	859.543	246.942	54.5254	1105.77	26.9391	4057	304.209	684.208	142.182	0.0749845	-3.73726	7.43919e-07	4.43909e-05
ENSG00000182050.13_3	MGAT4C	chr12	86349445	87232681	-	protein_coding_gene	1262	262.354	640.119	448.877	2279.9	321.017	468.333	299.89	359.798	198.527	109.106	226.253	230.121	190.271	36.0217	143.073	140.67	542.442	58.0656	158.6	84.1847	65.4305	80.6976	110.001	747.811	170.829	458.605	141.871	0.228453	-2.13003	7.46797e-07	4.45147e-05
ENSG00000197043.13_3	ANXA6	chr5	150480273	150537443	-	protein_coding_gene	4925.47	4297.83	4544.93	5142.04	6419.76	4166.87	4963.3	4663.01	2272.29	2038.5	1976.26	1299.59	3252.44	3164.35	726.792	1181.64	1672.15	3472.87	2955.01	1788.96	2965.54	1658.66	885.492	846.336	4890.4	2009.81	4794.24	1882.61	0.410982	-1.28285	7.52985e-07	4.48354e-05
ENSG00000110880.10_3	CORO1C	chr12	109038885	109125372	-	protein_coding_gene	7397.39	4375.11	5431.66	4827.43	7164.97	4376.64	5636.46	4785.15	3438.42	3228.55	2519.73	2167.44	4379.24	2987.74	2390.15	3700.34	3183.22	3650.94	4181.78	3518.03	4695.26	2624.85	2711	2313.39	5499.35	3230.63	5129.55	3205.89	0.587443	-0.767478	7.56337e-07	4.49867e-05
ENSG00000235091.1_3	BX324167.1	chr22	46271879	46283628	-	lncRNA	9.1893	17.1723	3.56116	12.0235	14.4102	31.7839	36.0256	3.27152	28.9123	38.8181	31.9084	69.9527	38.6841	88.793	462.985	61.7581	47.6462	21.6153	25.3377	110.909	96.5317	98.1457	35.9868	304.187	15.9297	97.6357	13.2169	54.7022	6.14175	2.61865	7.63727e-07	4.53775e-05
ENSG00000132429.9_3	POPDC3	chr6	105606155	105627870	-	protein_coding_gene	21.4417	1.90803	16.9155	40.0783	3.08791	6.35678	14.4102	5.45254	443.322	88.727	88.52	298.392	118.036	113.187	3.17839	489.948	69.2004	15.4395	7.39017	141.963	12.3471	20.7196	53.4349	99.8991	13.7064	128.982	10.3835	88.6235	9.39375	3.2317	7.71728e-07	4.58038e-05
ENSG00000011677.12_3	GABRA3	chrX	151334706	151619830	-	protein_coding_gene	139.371	38.1606	59.6495	160.313	142.044	24.3677	20.586	57.7969	38.5497	48.7999	18.5274	17.4882	17.8542	29.2724	12.7136	23.674	3.4033	13.3809	16.8918	21.0727	24.6942	11.9956	16.3576	38.1637	80.2861	22.0524	58.7232	18.1908	0.274394	-1.86568	7.75444e-07	4.59751e-05
ENSG00000198298.12_3	ZNF485	chr10	44101855	44113351	+	protein_coding_gene	197.57	432.168	454.048	435.851	199.685	454.51	384.959	336.967	689.612	527.926	674.193	790.246	526.699	694.732	720.435	775.065	505.957	478.626	517.312	478.017	697.049	675.024	593.236	783.479	361.97	632.975	408.564	674.609	1.7493	0.806781	7.80263e-07	4.62114e-05
ENSG00000213366.12_3	GSTM2	chr1	110210644	110252173	+	protein_coding_gene	385.951	727.913	874.266	678.325	1182.67	802.014	710.219	637.947	326.602	268.399	270.706	122.417	318.4	173.683	49.7948	112.194	162.224	601.113	313.555	214.054	78.5723	64.34	45.8013	50.5108	749.913	198.273	719.066	167.954	0.264453	-1.91891	8.10496e-07	4.79508e-05
ENSG00000211445.11_4	GPX3	chr5	150399999	150408554	+	protein_coding_gene	1681.64	1398.58	733.6	588.149	1111.65	1373.06	1559.39	3524.52	692.825	349.363	341.728	518.087	610.018	1046	118.66	160.571	188.316	629.933	713.68	260.636	351.331	163.576	280.26	584.803	1496.32	438.112	1385.82	350.347	0.292829	-1.77187	8.12732e-07	4.80318e-05
ENSG00000018625.14_3	ATP1A2	chr1	160085549	160113381	+	protein_coding_gene	1085.87	781.337	1035.41	945.847	3230.98	841.214	1044.74	504.905	487.226	523.489	305.703	230.625	741.941	227.349	363.396	120.428	147.476	572.292	615.496	188.545	107.756	378.406	364.23	112.246	1183.79	342.913	990.628	334.549	0.289704	-1.78735	8.16743e-07	4.82174e-05
ENSG00000187867.8_3	PALM3	chr19	14164177	14169971	-	protein_coding_gene	68.154	92.5394	64.9912	16.0313	81.3149	20.1298	63.8167	239.912	8.56661	18.8545	7.20512	14.2091	23.8056	14.6362	6.35678	5.14651	5.67217	24.7033	6.33443	7.76361	52.7557	38.1678	17.4481	1.12246	80.8611	15.7967	66.5726	11.3879	0.19538	-2.35565	8.17644e-07	4.82192e-05
ENSG00000166924.8_3	NYAP1	chr7	100081550	100092422	+	protein_coding_gene	35.2257	32.4365	31.1602	36.0705	83.3735	22.2487	15.4395	27.2627	9.63744	7.76361	26.7619	14.2091	10.9109	16.5877	14.8325	4.11721	5.67217	16.4688	16.8918	12.2	8.9797	13.0861	15.2671	3.36739	35.4021	12.2971	31.7983	12.643	0.348329	-1.52148	8.19312e-07	4.82662e-05
ENSG00000177181.14_3	RIMKLA	chr1	42846466	42888249	+	protein_coding_gene	137.84	477.961	500.343	261.511	185.274	502.186	315.996	312.976	673.55	458.053	1177.52	970.593	732.022	1311.4	575.288	677.281	744.188	373.637	783.358	758.616	1112.36	1002.18	438.384	784.601	336.761	785.815	314.486	751.402	2.33391	1.22275	8.32204e-07	4.89267e-05
ENSG00000250734.2_3	AL391335.1	chr1	151584514	151585839	-	as_lncRNA	13.784	20.0343	22.2573	42.0822	43.2307	14.8325	10.293	5.45254	9.63744	5.54544	9.26372	1.09301	9.919	7.80598	1.05946	1.0293	4.53773	8.23442	9.50165	4.43635	4.48985	1.09051	2.18102	1.12246	21.4958	5.05921	17.4334	4.51379	0.236741	-2.07862	8.32288e-07	4.89267e-05
ENSG00000206834.1	SNORA1	chr11	93465170	93465299	-	snoRNA	71.2171	54.3788	59.6495	43.0842	53.5237	69.9246	43.2307	32.7152	150.987	110.909	121.458	119.138	93.2386	157.095	74.1624	155.425	107.771	78.227	98.1837	74.3089	75.205	54.5254	90.5121	126.838	53.4655	105.499	53.9513	102.977	1.96892	0.977405	8.35897e-07	4.90349e-05
ENSG00000237989.1_2	LINC01679	chr21	44778027	44782229	-	lncRNA	197.57	28.6204	79.2359	65.1272	43.2307	66.7462	51.4651	35.9868	31.054	23.2908	8.23442	26.2322	29.757	16.5877	3.17839	9.26372	15.8821	37.0549	8.44591	27.7272	12.3471	25.0817	10.9051	1.12246	70.9978	17.8853	58.2962	16.2349	0.25151	-1.99131	8.35485e-07	4.90349e-05
ENSG00000228629.2_3	AC092295.1	chr19	37019220	37026137	+	as_lncRNA	14.5497	33.3905	21.367	43.0842	39.1135	32.8434	26.7619	41.4393	28.9123	79.8543	101.901	57.9295	74.3925	86.8415	94.2922	94.6958	43.1085	68.9632	66.5116	41.0362	66.2253	40.3488	89.4216	94.2868	31.5687	70.5451	33.1169	71.6779	2.24783	1.16853	8.37089e-07	4.90529e-05
ENSG00000188828.11_3	GLRA4	chrX	102962152	102983583	-	protein_coding_gene	10.7209	10.4942	9.7932	20.0391	22.6446	8.4757	11.3223	6.54305	5.35413	5.54544	6.17581	5.46505	6.9433	2.92724	2.11893	4.11721	2.26887	9.26372	4.22296	2.21818	1.12246	2.18102	3.27152	1.12246	12.5041	4.01989	10.6075	3.69437	0.324557	-1.62345	8.42611e-07	4.92723e-05
ENSG00000179799.9_3	OR7E22P	chr3	75405588	75411419	-	pseudogene	7.65775	9.54014	6.23204	5.00979	5.14651	6.35678	14.4102	5.45254	2.14165	2.21818	4.11721	1.09301	2.9757	1.9515	1.05946	2.0586	3.4033	1.0293	1.05574	4.43635	2.24492	1.09051	1.09051	1.12246	7.47572	2.06803	6.29441	2.00505	0.276367	-1.85534	8.41785e-07	4.92723e-05
ENSG00000137692.11_3	DCUN1D5	chr11	102932805	102962944	-	protein_coding_gene	1320.2	1999.61	1743.19	2025.96	2207.85	1702.56	1437.94	1494	2210.19	2048.48	2672.07	2781.71	2587.87	2099.81	3072.44	3290.68	2505.96	2720.45	2865.28	2946.85	2334.72	2167.93	2386.03	3731.06	1741.41	2651.35	1722.87	2629.97	1.52263	0.606562	8.43926e-07	4.92972e-05
ENSG00000163032.11_3	VSNL1	chr2	17720393	17838285	+	protein_coding_gene	416.582	729.821	685.524	737.44	1612.92	485.234	344.816	189.748	233.44	45.4726	60.7288	101.65	269.797	63.4236	16.9514	239.827	55.5872	457.01	76.0132	127.545	88.6745	31.6247	41.4393	14.592	650.26	120.236	585.379	69.7184	0.184955	-2.43475	8.46367e-07	4.93878e-05
ENSG00000237001.6_3	WASF3-AS1	chr13	27180681	27215501	-	as_lncRNA	21.4417	6.6781	2.67087	12.0235	5.14651	12.7136	5.14651	6.54305	22.4874	36.5999	50.4358	34.9763	36.7003	130.75	23.3082	36.0256	18.1509	27.7912	21.1148	28.8363	20.2043	10.9051	38.1678	21.3268	9.04547	34.8613	6.61057	28.3137	3.82743	1.93638	8.66818e-07	5.05279e-05
ENSG00000185201.16_3	IFITM2	chr11	307631	315272	+	protein_coding_gene	3294.36	1289.83	1671.08	1691.3	1277.36	1559.53	3313.32	7581.21	843.811	494.653	403.486	817.572	1508.68	1557.29	532.91	693.75	566.082	724.629	816.086	1093.56	1053.99	652.124	1124.31	120.103	2709.75	812.69	1681.19	770.358	0.299932	-1.73729	8.67738e-07	5.05284e-05
ENSG00000137804.12_3	NUSAP1	chr15	41624892	41673248	+	protein_coding_gene	103.38	82.9992	62.3204	135.264	174.981	69.9246	247.033	151.581	250.573	200.745	247.033	253.578	233.096	616.672	1136.8	655.666	212.139	367.461	252.322	149.727	892.357	1039.25	1002.18	203.166	128.435	482.048	119.322	252.95	3.75463	1.90867	8.7043e-07	5.05927e-05
ENSG00000184809.12_3	B3GALT5-AS1	chr21	40969074	40984748	-	as_lncRNA	128.65	58.1949	38.2825	28.0548	49.4065	21.1893	57.6409	18.5386	5.35413	23.2908	4.11721	4.37204	20.8299	33.1754	5.29732	8.23442	5.67217	15.4395	28.505	8.8727	16.8369	8.72406	7.63355	11.2246	49.9947	12.9737	43.8445	8.79838	0.25935	-1.94703	8.70667e-07	5.05927e-05
ENSG00000239213.5_3	NCK1-AS1	chr3	136560568	136580896	-	as_lncRNA	129.416	265.216	257.294	288.564	356.139	314.661	285.117	164.667	328.744	481.344	433.336	409.879	550.504	453.723	410.012	390.106	443.563	595.966	404.348	327.181	456.842	388.221	441.656	437.76	257.634	434.574	275.166	435.548	1.68845	0.755702	8.72631e-07	5.06537e-05
ENSG00000243238.1_3	IGKV2-30	chr2	89544264	89545079	-	protein_coding_gene	2768.28	17.1723	8.90291	19.0372	39.1135	7.41624	101.901	5.45254	5.35413	66.5453	2.0586	6.55806	15.8704	3.90299	3.17839	31.9084	6.8066	12.3516	1.05574	63.218	17.9594	13.0861	20.7196	10.1022	370.909	17.5422	18.1047	11.2269	0.047263	-4.40315	8.75631e-07	5.07747e-05
ENSG00000149294.16_4	NCAM1	chr11	112831969	113149158	+	protein_coding_gene	1117.27	600.075	974.868	929.816	4745.08	676.997	659.783	872.406	473.305	195.199	185.274	150.835	621.921	218.567	41.3191	154.395	316.507	850.204	469.804	210.727	496.128	159.214	152.671	291.84	1322.04	311.745	901.111	214.647	0.235822	-2.08423	8.80282e-07	5.09911e-05
ENSG00000183856.10_3	IQGAP3	chr1	156495197	156542396	-	protein_coding_gene	43.6492	25.7584	10.6835	30.0587	49.4065	13.773	56.6116	18.5386	40.6914	46.5817	67.9339	39.3484	104.149	120.017	313.601	139.985	55.5872	92.6372	137.246	44.3635	223.37	224.645	346.781	60.613	31.0599	128.597	27.9085	98.3933	4.13872	2.04918	8.82718e-07	5.10788e-05
ENSG00000198768.10_3	APCDD1L	chr20	57034157	57090187	-	protein_coding_gene	28.3337	9.54014	23.1476	11.0215	19.5567	26.4866	14.4102	21.8102	12.8499	15.5272	4.11721	4.37204	11.9028	5.85449	4.23785	5.14651	7.94103	10.293	3.16722	5.54544	6.73477	4.36203	7.63355	7.85723	19.2883	7.3464	20.6834	6.29463	0.3794	-1.39821	8.84766e-07	5.11439e-05
ENSG00000159212.12_3	CLIC6	chr21	36041688	36090525	+	protein_coding_gene	778.793	412.134	460.28	381.746	1048.86	375.05	630.962	497.272	255.927	281.708	220.271	210.951	371.962	137.58	57.211	173.952	121.384	359.226	231.207	218.49	154.9	121.046	40.3488	63.9803	573.137	188.759	478.776	192.452	0.329388	-1.60214	8.88706e-07	5.13181e-05
ENSG00000117477.12_3	CCDC181	chr1	169364108	169429907	-	protein_coding_gene	370.635	154.55	126.421	185.362	272.765	127.136	124.546	267.174	118.862	86.5088	99.8423	81.9758	119.028	80.9871	21.1893	55.5823	110.04	109.106	59.1214	105.363	93.1644	90.5121	82.8786	41.5311	203.574	84.7308	169.956	88.5105	0.416029	-1.26524	8.9071e-07	5.13803e-05
ENSG00000272884.1_4	AC113189.4	chr17	7342825	7349285	+	lncRNA	31.3968	21.9423	15.1349	14.0274	41.1721	37.0812	51.4651	22.9007	5.35413	6.65453	5.14651	5.46505	5.9514	9.75748	29.665	9.26372	9.07546	18.5274	12.6689	9.98179	7.85723	5.45254	9.81457	3.36739	29.3901	9.62519	27.1487	8.46635	0.328522	-1.60594	8.99556e-07	5.18367e-05
ENSG00000154319.14_3	FAM167A	chr8	11278972	11332224	-	protein_coding_gene	204.462	90.6313	569.786	80.1566	31.9084	164.217	242.915	515.81	69.6037	49.9089	31.9084	45.9064	132.915	54.6419	22.2487	17.4981	13.6132	113.223	74.9575	68.7634	40.4086	18.5386	67.6115	16.8369	237.486	52.4115	184.339	47.9077	0.2208	-2.17919	9.06047e-07	5.21565e-05
ENSG00000231789.2_3	PIK3CD-AS2	chr1	9732484	9747613	-	as_lncRNA	65.8567	109.712	71.2233	96.1879	53.5237	61.4489	112.194	73.064	31.054	19.9636	22.6446	24.0462	24.7975	97.5748	20.1298	16.4688	5.67217	28.8205	38.0066	22.1818	19.0819	9.81457	27.2627	11.2246	80.4012	26.1715	72.1436	22.4132	0.326505	-1.61482	9.07936e-07	5.2211e-05
ENSG00000137331.11_3	IER3	chr6	30710976	30712331	-	protein_coding_gene	7236.58	378.744	415.766	999.953	268.648	454.51	520.827	805.885	803.12	110.909	183.216	196.742	309.473	202.956	85.8165	328.347	134.998	236.74	291.384	235.127	181.839	320.609	27.2627	62.8579	1385.11	231.962	487.668	199.849	0.167455	-2.57815	9.09772e-07	5.22624e-05
ENSG00000156234.7_3	CXCL13	chr4	78432907	78532988	+	protein_coding_gene	258.066	104.942	67.6621	2223.34	1099.29	72.0435	481.713	513.629	82.4536	100.927	69.9926	67.7666	218.218	81.9628	63.5678	168.806	266.592	129.692	129.856	119.781	44.8985	27.2627	22.9007	149.287	602.587	108.998	369.89	91.6903	0.180901	-2.46673	9.16068e-07	5.25696e-05
ENSG00000135925.8_3	WNT10A	chr2	219745085	219764303	+	protein_coding_gene	76.5775	62.9649	207.438	32.0626	54.553	78.4003	50.4358	14.1766	16.0624	24.3999	8.23442	17.4882	32.7327	30.2482	8.4757	37.0549	12.4788	39.1135	13.7246	21.0727	6.73477	16.3576	4.36203	6.73477	72.0761	18.4547	58.759	16.21	0.25623	-1.96449	9.30465e-07	5.33406e-05
ENSG00000175591.11_3	P2RY2	chr11	72929343	72947397	+	protein_coding_gene	242.751	69.643	108.615	71.139	82.3442	92.1733	45.2893	81.7881	27.8415	13.3091	15.4395	15.3021	30.7489	17.5635	99.5895	24.7033	12.4788	36.0256	24.282	23.2908	3.36739	6.54305	3.27152	8.9797	99.2179	22.671	82.0661	16.5015	0.228535	-2.12951	9.36474e-07	5.36296e-05
ENSG00000176920.11_3	FUT2	chr19	49199228	49209207	+	protein_coding_gene	281.805	50.5627	33.8311	35.0685	62.7874	33.9028	304.673	70.883	28.9123	60.9998	3.08791	13.1161	15.8704	13.6605	4.23785	24.7033	4.53773	33.967	31.6722	19.9636	3.36739	3.27152	2.18102	4.48985	109.189	16.7524	56.6751	13.3883	0.153402	-2.70461	9.38352e-07	5.36817e-05
ENSG00000145626.11_3	UGT3A1	chr5	35951112	36001130	-	protein_coding_gene	52.8385	41.9766	8.90291	29.0568	91.6079	10.5946	11.3223	11.9956	6.42496	8.8727	4.11721	9.83709	1.9838	27.3209	3.17839	10.293	3.4033	1.0293	4.22296	4.43635	5.61231	4.36203	5.45254	3.36739	32.2869	6.49464	20.5262	4.39919	0.201745	-2.30939	9.52835e-07	5.44541e-05
ENSG00000159899.14_3	NPR2	chr9	35792151	35809729	+	protein_coding_gene	384.419	476.053	488.77	518.012	616.552	310.423	321.142	233.369	116.72	153.054	174.981	142.091	326.335	110.259	117.6	94.6958	161.089	274.824	272.381	98.7088	123.471	157.033	354.415	136.94	418.592	175.912	430.236	147.573	0.420279	-1.25058	9.69908e-07	5.53727e-05
ENSG00000111452.12_3	ADGRD1	chr12	131438452	131626014	+	protein_coding_gene	1624.97	515.168	355.226	404.791	1444.11	172.692	279.97	263.903	155.27	185.218	224.388	181.44	355.1	186.368	80.5192	170.864	206.467	318.054	225.928	238.454	220.003	208.287	107.96	139.185	632.604	200.219	380.008	196.417	0.316447	-1.65997	9.7321e-07	5.5504e-05
ENSG00000058335.15_3	RASGRF1	chr15	79252289	79383115	-	protein_coding_gene	98.0192	33.3905	37.3922	89.1742	176.011	31.7839	64.846	30.5342	24.629	39.9272	16.4688	15.3021	36.7003	15.612	10.5946	31.9084	22.6887	20.586	21.1148	41.0362	24.6942	6.54305	11.9956	12.3471	70.1439	22.0093	51.1191	20.8504	0.31367	-1.67268	9.77373e-07	5.56841e-05
ENSG00000134762.16_3	DSC3	chr18	28569974	28622781	-	protein_coding_gene	4496.63	1480.63	5469.95	2228.35	4151.18	2577.67	1668.5	3761.16	1434.91	452.508	1771.43	2027.53	1405.52	523.001	200.239	750.361	204.198	1189.87	616.552	573.398	304.187	333.695	495.091	1440.12	3229.26	857.663	3169.42	594.975	0.265594	-1.91271	9.78403e-07	5.56856e-05
ENSG00000106537.7_3	TSPAN13	chr7	16793160	16824161	+	protein_coding_gene	3462.84	4344.58	8121.23	4908.59	2627.81	4567.35	4363.21	5921.46	12993.4	8284.89	12118	14013.5	6327.33	14727.9	16403.7	16024.2	6684.08	6355.94	9542.83	7190.22	5622.41	23077.3	7909.45	16510.3	4789.63	11486.6	4465.28	10830.4	2.39822	1.26196	9.87543e-07	5.61482e-05
ENSG00000246228.6_3	CASC8	chr8	128302062	128494384	-	as_lncRNA	153.921	37.2065	32.9408	54.1057	33.967	38.1407	41.1721	27.2627	202.386	147.509	353.051	301.671	455.282	339.56	80.5192	176.011	351.674	36.0256	82.3476	54.3453	69.5926	98.1457	625.951	420.923	52.3395	237.187	37.6736	189.198	4.52175	2.17688	9.99539e-07	5.67153e-05
ENSG00000163378.13_4	EOGT	chr3	69024365	69063112	-	protein_coding_gene	3256.84	3165.42	3345.71	3787.4	4110	2724.94	2165.65	2776.43	2088.11	1449.58	1607.77	1822.05	2870.56	1545.58	1201.43	2018.46	1094.73	2381.81	2433.48	1310.94	1754.41	1285.71	1499.45	2018.19	3166.55	1773.89	3211.13	1681.09	0.560213	-0.835953	9.99564e-07	5.67153e-05
ENSG00000132718.8_3	SYT11	chr1	155829300	155854990	+	protein_coding_gene	1026.9	555.236	1111.08	714.395	1435.88	791.419	968.573	745.907	407.985	356.017	306.732	292.927	772.69	448.844	244.736	364.373	361.884	474.508	445.522	411.472	756.539	691.382	375.135	257.044	918.674	435.487	879.996	391.56	0.474042	-1.07691	1.00374e-06	5.68939e-05
ENSG00000242899.1_2	RPL7P16	chr3	131962372	131963109	-	pseudogene	623.341	717.418	4058.84	778.521	269.677	3279.04	1472.93	2293.34	8739.01	9470.5	7953.42	14392.8	6996.86	9011.03	2746.13	2559.87	8314.26	7607.57	5115.06	10699.4	7904.38	3227.9	7835.3	699.294	1686.64	7079.54	1125.73	7869.84	4.19749	2.06953	1.00517e-06	5.6917e-05
ENSG00000151012.13_3	SLC7A11	chr4	139085251	139163503	-	protein_coding_gene	1234.43	1029.38	1369.27	2264.42	839.911	1361.41	837.852	1773.17	6389.62	4296.61	5701.31	2541.25	3372.46	2194.46	6392.8	13643.4	3934.21	3391.55	1061.02	1506.14	1091.03	4374.03	4676.1	8339.89	1338.73	4556.62	1297.92	4115.41	3.40373	1.76712	1.00768e-06	5.70009e-05
ENSG00000275395.5_4	FCGBP	chr19	40353963	40440533	-	protein_coding_gene	3518.74	271.894	2401.11	506.99	634.05	905.841	922.255	1267.17	202.386	397.053	77.1977	175.975	512.812	837.191	55.0921	332.465	90.7546	167.776	254.433	79.8543	67.3477	124.318	592.146	111.124	1303.51	254.87	914.048	171.875	0.19554	-2.35446	1.00957e-06	5.70494e-05
ENSG00000242593.5_3	AC006148.1	chr7	123672259	124035172	+	as_lncRNA	361.446	103.988	82.797	309.605	1347.36	103.827	90.5786	67.6115	137.066	110.909	36.0256	59.0226	109.109	67.3266	27.546	85.4321	36.3019	91.6079	21.1148	88.727	32.5514	39.2583	43.6203	26.9391	308.401	63.2848	103.907	51.3214	0.20525	-2.28455	1.0169e-06	5.7405e-05
ENSG00000177098.8_3	SCN4B	chr11	118004092	118023603	-	protein_coding_gene	212.885	201.297	186.961	171.335	239.827	189.644	275.853	89.4216	85.6661	102.036	85.4321	83.0688	149.777	96.599	37.0812	39.1135	57.8561	137.926	130.912	57.6726	93.1644	55.6159	93.7837	42.6536	195.903	84.2724	195.47	85.5491	0.430342	-1.21644	1.03313e-06	5.82585e-05
ENSG00000253250.2_3	C8orf88	chr8	91970865	91997485	-	protein_coding_gene	585.052	821.406	855.569	1192.33	1303.1	640.975	652.578	1250.81	499.005	342.708	274.824	326.81	601.091	151.241	77.3408	174.981	317.641	797.709	348.394	273.945	246.942	148.309	122.137	245.819	912.727	309.306	838.488	274.384	0.338929	-1.56095	1.03412e-06	5.82585e-05
ENSG00000146005.3_3	PSD2	chr5	139175406	139224051	+	protein_coding_gene	47.4781	15.2642	23.1476	34.0665	59.6995	19.0703	16.4688	26.1722	20.3457	17.7454	11.3223	4.37204	11.9028	11.709	8.4757	7.20512	10.2099	14.4102	10.5574	21.0727	7.85723	5.45254	7.63355	6.73477	30.1709	11.0629	24.6599	10.3836	0.366024	-1.44999	1.04223e-06	5.85963e-05
ENSG00000170425.3_3	ADORA2B	chr17	15848231	15879060	+	protein_coding_gene	791.046	89.6773	89.0291	58.1135	94.6958	51.9137	99.8423	107.96	31.054	73.1998	18.5274	42.6274	44.6355	80.9871	16.9514	50.4358	46.5118	38.0842	25.3377	49.9089	29.184	20.7196	13.0861	66.2253	172.785	40.4672	92.1866	40.3558	0.233914	-2.09595	1.04202e-06	5.85963e-05
ENSG00000172954.13_3	LCLAT1	chr2	30670092	30867091	+	protein_coding_gene	2824.18	4698.52	6485.77	5469.68	6378.59	5503.91	3135.25	2406.75	4824.07	6742.14	13461.2	8663.2	15790.1	8837.35	7474.51	12505	12043.1	16864.1	12794.5	6433.82	7739.38	6559.4	11880	10029.2	4612.83	10165.1	5084.1	9433.27	2.20367	1.13991	1.04505e-06	5.86953e-05
ENSG00000134202.10_3	GSTM3	chr1	110276554	110283660	-	protein_coding_gene	2511.74	4144.24	2116.22	5355.46	3476.98	4030.2	3858.85	7371.83	2750.95	1115.74	692.72	500.599	756.82	1823.67	806.251	2802.79	895.068	1458.52	2684.74	1500.6	1004.6	844.053	300.98	1249.3	4108.19	1324.21	3944.53	1060.17	0.322348	-1.63331	1.05584e-06	5.92414e-05
ENSG00000168497.4_4	CAVIN2	chr2	192699028	192711981	-	protein_coding_gene	1794.98	1304.14	2299.62	1120.19	2348.87	1457.82	1777.6	1825.51	763.499	855.107	478.626	666.736	785.585	604.964	408.953	202.773	550.2	1729.23	1175.04	627.744	828.377	834.238	641.219	468.067	1741.09	726.272	1786.29	653.977	0.417139	-1.2614	1.08215e-06	6.06562e-05
ENSG00000101204.16_3	CHRNA4	chr20	61974575	62009753	-	protein_coding_gene	39.0545	2.86204	2.67087	18.0352	28.8205	3.17839	2.0586	4.36203	2.14165	2.21818	2.0586	1.09301	2.9757	3.90299	1.05946	2.0586	2.26887	1.0293	2.11148	2.21818	3.36739	2.18102	2.18102	2.24492	12.6303	2.1944	3.77021	2.18102	0.172583	-2.53464	1.08901e-06	6.09791e-05
ENSG00000269547.1_4	AC011455.3	chr19	39406044	39440495	-	protein_coding_gene	755.054	1149.59	1092.39	998.951	1072.53	914.317	779.182	1040.34	616.796	359.344	628.904	402.228	618.946	644.969	582.705	364.373	385.707	941.812	697.844	394.835	479.291	459.104	359.868	259.289	975.294	512.251	1019.65	469.198	0.525357	-0.928629	1.09109e-06	6.10337e-05
ENSG00000135451.12_4	TROAP	chr12	49717019	49725514	+	protein_coding_gene	7.65775	10.4942	9.7932	11.0215	9.26372	9.53517	24.7033	7.63355	21.4165	14.4181	39.1135	25.1392	23.8056	53.6661	107.006	57.6409	24.9575	24.7033	28.505	15.5272	60.613	97.0552	113.413	11.2246	11.2628	44.8878	9.66418	26.8221	3.99461	1.99805	1.09436e-06	6.1155e-05
ENSG00000092051.16_3	JPH4	chr14	24037244	24048009	-	protein_coding_gene	216.714	111.62	424.669	217.425	707.131	164.217	213.066	151.581	117.791	102.036	99.8423	56.8365	135.89	21.4664	16.9514	17.4981	40.8396	126.604	131.967	33.2726	32.5514	61.0684	19.6291	15.7145	275.803	64.3725	214.89	48.8381	0.233477	-2.09865	1.09745e-06	6.12661e-05
ENSG00000158292.6_3	GPR153	chr1	6307406	6321035	-	protein_coding_gene	449.51	137.378	137.105	145.284	214.095	105.946	155.425	140.675	57.8246	39.9272	78.227	66.6736	80.3439	87.8173	114.422	49.4065	40.8396	118.37	92.905	80.9634	84.1847	118.865	68.702	32.5514	185.677	75.7515	142.98	79.2854	0.407629	-1.29467	1.10463e-06	6.1605e-05
ENSG00000260788.5_4	AC009063.2	chr16	83754724	83806541	-	as_lncRNA	32.9283	10.4942	7.12233	6.01174	16.4688	4.23785	6.17581	11.9956	81.3828	48.7999	986.072	22.9532	152.753	33.1754	94.2922	5.14651	113.443	87.4907	8.44591	44.3635	48.2659	16.3576	7.63355	114.491	11.9293	116.567	8.80824	48.5329	9.73798	3.28362	1.11519e-06	6.21311e-05
ENSG00000211890.3	IGHA2	chr14	106053226	106054732	-	protein_coding_gene	7855.32	102.079	32.9408	126.247	955.192	24.3677	458.039	9.81457	11.7791	276.163	13.3809	43.7204	89.271	87.8173	14.8325	154.395	43.1085	153.366	118.243	117.563	50.5108	107.96	202.834	29.184	1195.5	94.6331	114.163	88.5441	0.0791503	-3.65926	1.12121e-06	6.24037e-05
ENSG00000183734.4_3	ASCL2	chr11	2289725	2292182	-	protein_coding_gene	45.1807	83.9532	85.4679	108.211	47.3479	66.7462	78.227	70.883	80.312	9.98179	2.0586	10.9301	20.8299	24.3937	8.4757	6.17581	17.0165	16.4688	17.9476	12.2	8.9797	3.27152	3.27152	1.12246	73.2522	15.2147	74.555	10.4559	0.207947	-2.26571	1.14195e-06	6.34944e-05
ENSG00000109586.11_3	GALNT7	chr4	174089904	174245118	+	protein_coding_gene	9887.69	19639.3	28017.5	16078.4	19339.6	17864.7	16417.4	11736	44969.3	34277.5	57550.3	42271.1	33557	26548.1	38581.4	36219.1	35027.9	83549.5	41359.6	19118.5	11938.5	44046.7	55644.2	40220.1	17372.6	40304.9	17141	39400.7	2.32004	1.21415	1.15442e-06	6.41233e-05
ENSG00000142621.19_3	FHAD1	chr1	15573768	15726779	+	protein_coding_gene	183.02	124.022	188.742	114.223	264.531	166.336	135.868	150.49	109.224	106.472	63.8167	49.1855	100.182	113.187	93.2328	84.4028	65.7971	97.7837	66.5116	69.8725	133.573	58.8874	105.779	46.0209	165.904	85.2455	158.413	88.8178	0.513927	-0.960365	1.15938e-06	6.43347e-05
ENSG00000267405.1_3	AC005180.1	chr17	42872115	42875151	-	lncRNA	335.41	456.973	503.905	355.695	399.369	295.59	413.779	220.283	341.594	131.981	57.6409	98.3709	106.133	65.3751	6.35678	54.553	66.9316	146.161	109.797	63.218	200.921	76.3355	28.3532	53.8782	372.625	100.475	377.532	71.6335	0.269607	-1.89107	1.16695e-06	6.46899e-05
ENSG00000272763.1_3	AC103702.2	chr17	46713285	46724385	-	lncRNA	23.739	6.6781	8.90291	13.0254	3.08791	6.35678	9.26372	28.3532	3.21248	4.43635	1.0293	2.18602	3.9676	2.92724	1.05946	3.08791	1.13443	10.293	1.05574	3.32726	1.12246	1.09051	4.36203	2.24492	12.4259	2.90855	9.08331	2.58608	0.234559	-2.09198	1.16846e-06	6.47091e-05
ENSG00000205037.2_3	AC134312.1	chr16	88121647	88134591	-	lncRNA	39.8203	5.72408	8.01262	7.0137	6.17581	1.05946	11.3223	4.36203	5.35413	1.10909	1.0293	2.18602	1.9838	3.90299	3.17839	1.0293	2.26887	1.0293	2.11148	1.10909	1.12246	1.09051	1.09051	1.12246	10.4363	1.91986	6.59476	1.12246	0.181587	-2.46127	1.1777e-06	6.51557e-05
ENSG00000145936.8_3	KCNMB1	chr5	169801675	169816681	-	protein_coding_gene	618.746	538.064	1231.27	466.912	1169.29	510.661	707.131	321.7	245.219	250.654	173.952	139.905	360.06	131.726	69.9246	53.5237	66.9316	311.879	507.811	158.6	356.943	226.826	89.4216	68.4702	695.472	200.74	578.405	166.276	0.288647	-1.79262	1.18956e-06	6.57461e-05
ENSG00000177283.7_3	FZD8	chr10	35927177	35931206	-	protein_coding_gene	117.929	133.562	123.75	105.205	59.6995	131.373	106.018	78.5166	342.664	311.654	640.226	797.898	440.404	514.219	261.687	66.9046	162.224	123.516	204.813	149.727	704.906	300.98	267.174	179.594	107.007	341.787	111.974	284.077	3.19322	1.67501	1.19209e-06	6.58204e-05
ENSG00000230943.1_3	LINC02541	chr6	113944737	113971276	-	lncRNA	191.444	152.642	345.433	175.342	157.483	204.476	177.04	162.486	141.349	54.3453	22.6446	85.2548	130.931	40.0057	31.7839	37.0549	64.6627	120.428	16.8918	108.691	37.0412	37.0773	45.8013	24.6942	195.793	62.416	176.191	42.9035	0.318789	-1.64933	1.19903e-06	6.61376e-05
ENSG00000165799.4_3	RNASE7	chr14	21510385	21512393	+	protein_coding_gene	24.5048	8.58613	19.5864	7.0137	11.3223	16.9514	9.26372	9.81457	7.49578	2.21818	1.0293	5.46505	6.9433	2.92724	2.11893	6.17581	1.13443	4.11721	4.22296	9.98179	4.48985	5.45254	1.09051	1.12246	13.3804	4.12408	10.5684	4.17008	0.305861	-1.70905	1.20201e-06	6.6236e-05
ENSG00000160124.9_3	CCDC58	chr3	122078438	122102078	-	protein_coding_gene	416.582	720.281	616.081	644.258	569.204	592.24	546.559	539.801	821.324	1004.83	705.072	779.316	825.261	723.029	733.148	1149.73	735.113	825.5	717.903	798.543	831.744	912.755	799.342	819.397	580.626	823.876	580.722	809.37	1.41938	0.505265	1.20495e-06	6.63319e-05
ENSG00000115221.10_3	ITGB6	chr2	160956177	161128399	-	protein_coding_gene	11117.5	2107.42	2100.2	1722.36	4666.86	1737.52	1461.61	1994.54	872.723	758.616	367.461	722.48	1948.09	973.796	86.876	834.764	390.245	2124.48	457.135	877.288	611.742	312.976	198.472	275.003	3363.5	738.259	2047.37	667.111	0.219493	-2.18775	1.20938e-06	6.65098e-05
ENSG00000261116.1_3	AL049555.1	chr6	54807965	54809897	+	lncRNA	257.3	257.584	352.555	298.583	251.15	308.304	174.981	224.645	91.0202	46.5817	11.3223	63.3946	62.4897	28.2967	145.146	20.586	12.4788	93.6665	70.7345	110.909	10.1022	8.72406	7.63355	1.12246	265.638	49.013	257.442	37.4392	0.184545	-2.43796	1.21118e-06	6.6543e-05
ENSG00000101276.14_3	SLC52A3	chr20	740724	756658	-	protein_coding_gene	644.017	952.106	2290.72	762.489	262.472	915.376	675.222	437.294	320.177	155.272	192.48	269.974	365.019	297.603	379.288	260.413	100.965	233.652	380.066	596.689	230.105	487.457	339.148	323.269	867.462	308.223	718.856	308.89	0.355279	-1.49298	1.21468e-06	6.66691e-05
ENSG00000272695.1_2	GAS6-AS2	chr13	114567141	114569806	+	lncRNA	39.8203	54.3788	61.4301	35.0685	71.0219	49.7948	40.1428	52.3444	34.2664	28.8363	18.5274	17.4882	30.7489	26.3452	11.6541	14.4102	14.7476	23.674	27.4492	33.2726	44.8985	29.4437	20.7196	14.592	50.5002	24.4421	51.0696	25.0096	0.484185	-1.04637	1.22115e-06	6.69579e-05
ENSG00000169583.12_3	CLIC3	chr9	139889087	139891255	-	protein_coding_gene	37.523	37.2065	44.5145	35.0685	28.8205	54.0326	28.8205	11.9956	12.8499	11.0909	2.0586	7.65107	9.919	8.78173	8.4757	8.23442	3.4033	12.3516	11.6131	8.8727	40.4086	9.81457	9.81457	1.12246	34.7477	10.4039	36.1375	9.34364	0.298618	-1.74363	1.23468e-06	6.75989e-05
ENSG00000236045.1_4	AL031283.3	chr1	15660662	15661960	-	as_lncRNA	9.1893	6.6781	71.2233	5.00979	30.8791	28.6055	17.4981	20.7196	11.7791	4.43635	2.0586	1.09301	17.8542	1.9515	1.05946	2.0586	2.26887	7.20512	1.05574	3.32726	4.48985	1.09051	1.09051	2.24492	23.7254	4.06647	19.1089	2.15176	0.172225	-2.53763	1.23528e-06	6.75989e-05
ENSG00000139629.15_3	GALNT6	chr12	51745031	51786651	-	protein_coding_gene	260.364	112.574	141.556	121.237	164.688	132.433	233.652	143.947	47.1164	99.8179	41.1721	74.3247	91.2548	106.356	112.303	89.5493	35.1674	104.989	51.7312	65.4362	65.1028	65.4305	69.7925	21.3268	163.806	71.3044	142.752	67.6143	0.43538	-1.19965	1.23843e-06	6.77043e-05
ENSG00000223382.4_2	LINC01778	chr1	31297075	31307278	+	lncRNA	35.2257	44.8387	39.1728	36.0705	30.8791	29.665	42.2014	23.9912	31.054	14.4181	9.26372	6.55806	15.8704	9.75748	4.23785	7.20512	9.07546	19.5567	14.7803	8.8727	26.9391	13.0861	3.27152	2.24492	35.2555	12.262	35.6481	9.5106	0.347612	-1.52445	1.24167e-06	6.78148e-05
ENSG00000253105.5_3	AP003548.1	chr8	97384093	97399666	-	lncRNA	20.6759	20.0343	17.8058	28.0548	54.553	16.9514	21.6153	8.72406	6.42496	14.4181	11.3223	8.74408	14.8785	4.87874	3.17839	3.08791	3.4033	11.3223	4.22296	9.98179	12.3471	3.27152	3.27152	6.73477	23.5518	7.59302	20.3551	6.57986	0.322781	-1.63137	1.24965e-06	6.81837e-05
ENSG00000237685.1_3	AL139039.3	chr6	10511269	10514779	-	as_lncRNA	9.95508	7.63211	8.01262	6.01174	5.14651	8.4757	7.20512	6.54305	1.07083	3.32726	1.0293	4.37204	2.9757	0.975748	2.11893	2.0586	1.13443	4.11721	1.05574	5.54544	1.12246	2.18102	1.09051	1.12246	7.37274	2.2061	7.41861	1.59652	0.296129	-1.7557	1.25375e-06	6.83397e-05
ENSG00000178460.17_3	MCMDC2	chr8	67782984	67834283	+	protein_coding_gene	91.1272	181.263	240.379	120.235	119.399	190.703	135.868	104.689	367.293	199.636	440.541	252.485	250.951	246.864	358.099	529.061	441.294	283.058	332.558	343.817	252.554	455.832	127.589	876.643	147.958	359.892	128.051	338.187	2.43215	1.28223	1.26713e-06	6.90013e-05
ENSG00000180447.6_3	GAS1	chr9	89559278	89562104	-	protein_coding_gene	1293.39	623.925	1695.11	519.014	366.432	871.938	788.446	3239.9	652.133	277.272	151.307	233.904	436.436	120.993	48.7353	49.4065	245.038	434.366	480.361	500.199	152.655	206.106	57.7969	79.6948	1174.77	257.9	830.192	220.005	0.219538	-2.18746	1.26994e-06	6.90867e-05
ENSG00000149043.16_3	SYT8	chr11	1849537	1858751	+	protein_coding_gene	27.5679	14.3102	29.3796	6.01174	6.17581	10.5946	4.11721	7.63355	3.21248	4.43635	1.0293	6.55806	3.9676	4.87874	1.05946	2.0586	2.26887	6.17581	1.05574	2.21818	6.73477	4.36203	2.18102	1.12246	13.2238	3.33247	9.11409	2.74067	0.248944	-2.0061	1.27147e-06	6.91017e-05
ENSG00000124812.14_3	CRISP1	chr6	49801970	49844809	-	protein_coding_gene	40.5861	3.81606	4.45145	3.00587	3.08791	3.17839	7.20512	778.623	19.2749	12.2	10.293	15.3021	5.9514	10.7332	4.23785	5.14651	3.4033	2.0586	3.16722	13.3091	4.48985	6.54305	8.72406	7.85723	105.494	8.29321	4.13376	7.20014	0.0786474	-3.66846	1.29279e-06	7.0192e-05
ENSG00000221241.1	SNORD88A	chr19	51302699	51302789	-	snoRNA	6.1262	27.6664	8.01262	21.0411	13.3809	5.29732	12.3516	6.54305	13.9207	33.2726	53.5237	16.3952	33.7246	80.9871	21.1893	78.227	41.974	59.6995	67.5673	23.2908	40.4086	18.5386	35.9868	41.5311	12.5524	41.2648	10.1821	38.1977	3.29447	1.72005	1.29994e-06	7.03045e-05
ENSG00000184007.18_3	PTP4A2	chr1	32372022	32410457	-	protein_coding_gene	12708.8	13329.5	14960.4	11691.8	8216.92	12726.3	11746.4	18887.6	10527.3	7303.34	5557.2	8097.02	6381.88	7427.39	9806.39	7621.98	6488.96	7493.32	10470.8	8636.47	6368.85	8918.17	10304.2	7294.88	13033.5	8043.64	12717.5	7557.65	0.617153	-0.6963	1.29947e-06	7.03045e-05
ENSG00000164039.14_3	BDH2	chr4	104000592	104021040	-	protein_coding_gene	1461.86	1058.96	1605.19	2330.55	2009.2	1581.78	1332.95	3206.09	1004.44	666.562	548.618	597.877	929.41	596.182	99.5895	853.292	849.69	1042.68	830.867	634.398	722.866	442.746	399.126	1166.24	1823.32	711.536	1593.49	694.714	0.39026	-1.35749	1.29742e-06	7.03045e-05
ENSG00000102554.13_3	KLF5	chr13	73629114	73651680	+	protein_coding_gene	10243.8	3343.82	4587.67	1577.08	3104.38	3714.48	2761.62	2122.13	1245.37	962.688	1231.05	1761.93	1837	1672.43	3030.06	1604.68	1975.05	2270.64	1451.64	1268.8	1075.32	1319.51	945.47	675.722	3931.87	1520.46	3224.1	1385.58	0.386683	-1.37078	1.29806e-06	7.03045e-05
ENSG00000201839.1	SNORD114-3	chr14	101419686	101419760	+	snoRNA	62.0278	50.5627	31.1602	87.1703	38.0842	36.0217	41.1721	46.8918	41.7622	26.6181	17.4981	10.9301	17.8542	16.5877	3.17839	15.4395	13.6132	16.4688	8.44591	23.2908	33.6739	7.63355	5.45254	15.7145	49.1364	17.1351	44.032	16.0917	0.348277	-1.52169	1.33299e-06	7.18816e-05
ENSG00000256508.2_3	MRGPRF-AS1	chr11	68779751	68785915	+	as_lncRNA	23.739	22.8963	27.599	30.0587	46.3186	42.3785	78.227	10.9051	8.56661	24.3999	12.3516	7.65107	22.8137	10.7332	3.17839	7.20512	17.0165	19.5567	9.50165	8.8727	10.1022	9.81457	4.36203	5.61231	35.2653	11.3586	28.8289	9.65811	0.322944	-1.63064	1.33087e-06	7.18816e-05
ENSG00000261273.1_3	AC138512.1	chr16	88268391	88336117	+	lncRNA	170.768	35.2985	37.3922	29.0568	62.7874	13.773	20.586	18.5386	25.6998	18.8545	12.3516	9.83709	17.8542	11.709	3.17839	14.4102	18.1509	21.6153	7.39017	15.5272	7.85723	8.72406	6.54305	7.85723	48.5251	12.9725	32.1776	12.0303	0.266277	-1.909	1.3322e-06	7.18816e-05
ENSG00000224593.1_3	AC092427.1	chr7	3377521	3378233	+	pseudogene	33.6941	31.4825	8.90291	24.047	117.34	8.4757	11.3223	15.2671	94.2327	98.7088	360.256	133.347	552.488	81.9628	61.4489	180.128	429.95	881.083	54.8984	13.3091	65.1028	14.1766	201.744	453.475	31.3165	229.769	19.657	116.028	7.33845	2.87548	1.33453e-06	7.18946e-05
ENSG00000153822.13_3	KCNJ16	chr17	68049570	68131749	+	protein_coding_gene	55.9016	9.54014	18.6961	18.0352	2.0586	8.4757	15.4395	880.04	20.3457	29.9454	13.3809	9.83709	9.919	15.612	2.11893	22.6446	3.4033	13.3809	9.50165	6.65453	15.7145	6.54305	10.9051	14.592	126.023	12.7812	16.7374	12.143	0.101494	-3.30053	1.33609e-06	7.19088e-05
ENSG00000124787.13_3	RPP40	chr6	4994966	5004297	-	protein_coding_gene	137.84	162.182	157.581	212.415	111.165	217.19	228.505	174.481	402.631	308.326	438.483	283.09	232.105	434.208	314.661	446.717	260.92	207.919	172.085	329.399	377.147	426.389	223.554	465.822	175.17	332.716	168.332	322.03	1.90051	0.926384	1.34538e-06	7.23388e-05
ENSG00000244193.1_3	AC008040.4	chr3	169663775	169664542	-	pseudogene	298.652	267.124	470.074	140.274	288.205	246.855	238.798	225.735	108.153	99.8179	51.4651	37.1624	95.2224	63.4236	28.6055	23.674	77.1414	94.6958	264.991	72.0907	178.471	98.1457	46.8918	88.6745	271.965	89.2891	256.989	82.908	0.328192	-1.60739	1.35266e-06	7.26596e-05
ENSG00000143797.11_4	MBOAT2	chr2	8992820	9143942	-	protein_coding_gene	8559.83	21105.7	19081.6	29776.2	18261.9	14080.3	9651.77	12804.7	27568.4	30786.1	41884.4	36607.1	27246.5	24531.3	30012.5	55039.9	20762.4	43695.9	37680.4	21640.5	27342.1	34680.3	46521.1	51414.4	16665.2	34838.3	16171.1	32733.2	2.09049	1.06384	1.35745e-06	7.28464e-05
ENSG00000249082.2_2	C5orf66-AS1	chr5	134374521	134375737	-	lncRNA	7.65775	10.4942	8.01262	3.00587	6.17581	15.8919	5.14651	2.18102	1.07083	2.21818	1.0293	3.27903	0.9919	2.92724	1.05946	1.0293	2.26887	1.0293	4.22296	3.32726	1.12246	1.09051	1.09051	1.12246	7.32071	1.80497	6.91678	1.10648	0.245478	-2.02633	1.37353e-06	7.36377e-05
ENSG00000126010.5_3	GRPR	chrX	16141679	16171144	+	protein_coding_gene	54.37	106.85	46.2951	175.342	48.3772	27.546	14.4102	51.2539	72.8162	646.598	685.515	430.646	211.275	714.247	161.038	36.0256	864.438	133.809	96.0723	329.399	43.776	124.318	351.143	1811.65	65.5556	419.548	49.8155	270.337	6.39904	2.67785	1.38485e-06	7.41729e-05
ENSG00000152784.15_3	PRDM8	chr4	81105033	81125483	+	protein_coding_gene	883.705	2829.61	2369.95	723.413	1658.21	1276.65	1003.57	1198.47	478.659	139.745	388.047	267.788	1129.77	112.211	47.6758	94.6958	86.2169	1012.83	427.574	181.89	222.247	105.779	123.227	131.328	1492.95	309.356	1237.56	160.818	0.207238	-2.27064	1.38881e-06	7.43136e-05
ENSG00000204592.8_3	HLA-E	chr6	30457244	30461982	+	protein_coding_gene	18046.3	9841.61	9009.74	10951.4	7565.37	9909.16	14527.6	19748	6265.4	5061.88	3655.05	4634.36	9444.87	7678.16	7829.43	6825.3	4914.36	6323	6031.44	6060.06	7087.23	6978.16	6170.09	2176.45	12449.9	6070.95	10430.3	6217.75	0.487635	-1.03613	1.39709e-06	7.46846e-05
ENSG00000236423.5_2	LINC01134	chr1	3816936	3833789	+	lncRNA	18.3786	33.3905	35.6116	43.0842	20.586	28.6055	36.0256	73.064	71.7454	63.218	221.3	74.3247	186.477	99.5263	132.433	167.776	53.3184	86.4614	78.1247	39.9272	71.8376	104.689	166.848	39.2862	36.0933	103.581	34.5011	82.293	2.8787	1.52542	1.40249e-06	7.48289e-05
ENSG00000223764.2_3	AL645608.1	chr1	852245	856396	-	lncRNA	183.786	232.779	1252.64	108.211	162.63	307.244	248.062	243.183	121.003	27.7272	41.1721	73.2317	171.599	27.3209	24.3677	22.6446	102.099	168.806	59.1214	98.7088	62.8579	81.7881	75.245	4.48985	342.317	72.6364	237.981	68.0448	0.212186	-2.2366	1.40139e-06	7.48289e-05
ENSG00000196730.12_3	DAPK1	chr9	90112143	90323548	+	protein_coding_gene	2952.83	3864.71	4356.19	3759.34	4248.96	3661.5	3536.68	1599.77	6044.81	6058.95	9007.42	8937.55	9117.54	4512.83	3253.61	8026.5	7200.25	8286.91	10742.1	4589.4	5983.85	6992.34	8219.16	4290.05	3497.5	6953.96	3710.42	7096.29	1.98825	0.9915	1.40899e-06	7.50311e-05
ENSG00000138442.9_3	WDR12	chr2	203739505	203879521	-	protein_coding_gene	1303.35	1468.23	1615.88	1659.24	1296.92	1469.48	1582.04	1440.56	2316.2	1946.45	2514.59	2047.21	1875.68	2271.54	2396.51	3257.74	2040.85	2101.84	1812.7	2256.99	1657.88	2569.24	1541.98	2867.89	1479.46	2217.2	1468.85	2179.41	1.49873	0.58374	1.40825e-06	7.50311e-05
ENSG00000272664.1_3	AC103710.3	chr11	4739842	4740789	+	pseudogene	1.53155	12.4022	0.890291	10.0196	1.0293	1.05946	2.0586	1.09051	18.204	12.2	66.9046	25.1392	73.4006	10.7332	60.3894	75.1391	21.5542	9.26372	64.4001	3.32726	5.61231	3.27152	3.27152	52.7557	3.76018	31.5979	1.31103	19.8791	8.40582	3.07139	1.4122e-06	7.51298e-05
ENSG00000251073.1_2	NUDT19P5	chr4	159103977	159104545	+	pseudogene	3.82888	9.54014	8.90291	28.0548	47.3479	27.546	19.5567	8.72406	48.1872	60.9998	66.9046	81.9758	159.696	44.8844	42.3785	162.63	138.401	80.2856	35.8951	120.891	26.9391	25.0817	38.1678	47.1434	19.1877	73.7788	14.5484	54.5935	3.86315	1.94978	1.43636e-06	7.63418e-05
ENSG00000265126.1_3	AC004448.5	chr17	19315099	19316431	-	as_lncRNA	6.89198	7.63211	2.67087	12.0235	13.3809	3.17839	1.0293	1.09051	1.07083	1.10909	1.0293	1.09301	0.9919	0.975748	1.05946	1.0293	1.13443	1.0293	1.05574	1.10909	1.12246	1.09051	1.09051	1.12246	5.9872	1.06957	5.03518	1.08067	0.177717	-2.49234	1.46165e-06	7.76116e-05
ENSG00000267206.5_3	LCN6	chr9	139638463	139642980	-	protein_coding_gene	63.5593	38.1606	36.5019	38.0744	18.5274	18.0109	47.3479	68.702	13.9207	27.7272	22.6446	10.9301	18.8461	12.6847	1.05946	16.4688	7.94103	25.7326	15.8361	11.0909	5.61231	10.9051	14.1766	6.73477	41.1105	13.8944	38.1175	13.3027	0.338286	-1.56369	1.46611e-06	7.77738e-05
ENSG00000188508.10_3	KRTDAP	chr19	35978226	35986460	-	protein_coding_gene	13.0182	14.3102	26.7087	12.0235	19.5567	19.0703	15.4395	20.7196	5.35413	2.21818	5.14651	7.65107	11.9028	8.78173	1.05946	4.11721	2.26887	14.4102	7.39017	11.0909	2.24492	1.09051	5.45254	3.36739	17.6059	5.84666	17.2549	5.25032	0.335022	-1.57767	1.47816e-06	7.83384e-05
ENSG00000003249.13_3	DBNDD1	chr16	90071273	90086536	-	protein_coding_gene	55.1358	106.85	113.957	51.0998	46.3186	92.1733	129.692	71.9735	113.508	82.0725	218.212	81.9758	228.137	140.508	621.905	145.132	174.703	200.714	410.683	207.399	708.274	624.861	407.85	231.227	83.4	287.322	82.0734	212.806	3.44522	1.7846	1.48135e-06	7.84324e-05
ENSG00000159131.16_4	GART	chr21	34876238	34915797	-	protein_coding_gene	2452.78	2575.84	2430.49	2792.45	2384.89	2297.98	2508.41	2677.2	3335.62	3179.75	3962.81	3148.96	3180.03	3454.15	3952.86	4614.36	3024.4	3335.97	3529.34	2982.34	2861.16	4622.66	3141.75	4816.48	2515	3571.42	2480.59	3335.8	1.42008	0.505968	1.49117e-06	7.88769e-05
ENSG00000187840.4_3	EIF4EBP1	chr8	37887859	37917883	+	protein_coding_gene	188.381	234.687	198.535	246.481	151.307	281.817	431.278	344.6	818.111	773.034	1548.07	935.617	444.371	903.542	753.278	318.054	256.382	217.183	800.25	581.162	1285.22	1167.93	585.603	314.289	259.636	731.381	240.584	763.156	2.81771	1.49452	1.49734e-06	7.89023e-05
ENSG00000197852.9_3	FAM212B	chr1	112223252	112298446	-	protein_coding_gene	509.24	451.249	543.077	519.014	747.273	471.461	549.647	406.759	236.653	209.618	246.003	203.3	275.748	284.918	479.937	192.48	178.106	267.619	431.797	275.054	257.044	476.552	268.265	197.553	524.715	280.04	514.127	262.331	0.533751	-0.905762	1.49644e-06	7.89023e-05
ENSG00000156127.6_3	BATF	chr14	75988768	76013358	+	protein_coding_gene	896.723	77.2751	114.848	92.18	63.8167	67.8056	149.249	443.837	72.8162	58.7816	19.5567	36.0693	89.271	78.0598	43.438	126.604	17.0165	67.9339	30.6164	65.4362	57.2456	45.8013	21.8102	17.9594	238.217	53.026	103.514	51.5234	0.222576	-2.16763	1.49498e-06	7.89023e-05
ENSG00000225069.3_3	AL080312.1	chr20	25079741	25080564	+	pseudogene	34.4599	47.7007	39.1728	9.01761	10.293	12.7136	22.6446	8.72406	6.42496	16.6363	1.0293	10.9301	1.9838	5.85449	1.05946	3.08791	1.13443	3.08791	1.05574	12.2	2.24492	4.36203	1.09051	1.12246	23.0908	4.58152	17.6791	2.66642	0.197134	-2.34275	1.49705e-06	7.89023e-05
ENSG00000169504.14_3	CLIC4	chr1	25071848	25170815	+	protein_coding_gene	17211.6	13777.9	13740.7	17094.4	17494	12523.9	11669.2	16067.5	9543.2	7184.67	8828.33	7014.94	9329.81	7747.44	10540.6	8136.63	9074.33	9685.73	13457.5	6815.34	14821	10664.1	7910.54	8255.71	14947.4	9313.12	14922.7	8951.33	0.623055	-0.682568	1.5002e-06	7.8978e-05
ENSG00000242317.1_3	AC121764.1	chr3	55527858	55539289	-	lncRNA	196.804	14.3102	22.2573	5.00979	19.5567	11.6541	2.0586	94.8742	5.35413	6.65453	7.20512	7.65107	5.9514	4.87874	13.773	20.586	5.67217	7.20512	1.05574	5.54544	2.24492	2.18102	10.9051	4.48985	45.8156	6.95959	16.9335	5.81178	0.151716	-2.72055	1.50763e-06	7.92936e-05
ENSG00000184313.19_3	MROH7	chr1	55107427	55175939	+	protein_coding_gene	971.769	1009.35	1514.38	563.1	1781.72	1100.78	955.192	423.117	368.364	324.963	312.908	174.882	714.168	248.816	36.0217	85.4321	117.981	622.728	176.308	302.781	205.411	64.34	61.0684	47.1434	1039.93	241.457	990.558	190.859	0.232218	-2.10645	1.51777e-06	7.9751e-05
ENSG00000231870.4_2	KRT17P3	chr17	28894718	28898766	-	pseudogene	32.1626	4.77007	2.67087	13.0254	4.11721	5.29732	5.14651	7.63355	6.42496	1.10909	1.0293	1.09301	1.9838	1.9515	1.05946	3.08791	1.13443	2.0586	2.11148	2.21818	1.12246	1.09051	1.09051	1.12246	9.35294	1.85548	5.22191	1.12845	0.196038	-2.35079	1.52213e-06	7.99046e-05
ENSG00000198835.3_3	GJC2	chr1	228337553	228347527	+	protein_coding_gene	101.082	55.3328	143.337	43.0842	45.2893	62.5083	59.6995	49.0728	22.4874	21.0727	58.6702	28.4183	40.6679	22.4422	14.8325	16.4688	23.8231	43.2307	26.3935	24.3999	26.9391	18.5386	39.2583	7.85723	69.9258	27.2188	57.5162	24.1115	0.388848	-1.36272	1.52654e-06	8.00601e-05
ENSG00000077348.8_3	EXOSC5	chr19	41892279	41903384	-	protein_coding_gene	121.758	187.941	193.193	156.305	91.6079	200.239	243.945	163.576	288.052	357.126	398.34	247.02	202.348	445.917	647.332	382.9	226.887	274.824	315.666	301.672	291.84	582.331	234.459	328.881	169.821	345.35	175.758	308.669	2.03443	1.02462	1.54753e-06	8.10842e-05
ENSG00000088325.15_3	TPX2	chr20	30327074	30389608	+	protein_coding_gene	69.6855	42.9306	33.8311	107.209	121.458	42.3785	145.132	62.1589	129.57	110.909	179.099	123.51	175.566	378.59	597.537	549.647	138.401	222.329	190.033	75.418	427.658	568.155	1058.88	139.185	78.0979	316.531	65.9222	184.566	4.05456	2.01955	1.56301e-06	8.15873e-05
ENSG00000159164.9_3	SV2A	chr1	149874870	149889434	-	protein_coding_gene	128.65	74.4131	112.177	74.1448	189.392	78.4003	102.93	58.8874	31.054	39.9272	39.1135	25.1392	99.19	49.7631	32.8434	16.4688	39.7052	72.0512	48.564	41.0362	34.7963	44.7108	37.0773	19.0819	102.374	41.9076	90.6652	39.4093	0.409683	-1.28742	1.56157e-06	8.15873e-05
ENSG00000265158.1_2	LRRC37A7P	chr18	29304161	29306919	+	pseudogene	61.262	93.4934	96.1514	79.1546	118.37	72.0435	73.0805	65.4305	47.1164	22.1818	22.6446	40.4414	20.8299	40.0057	13.773	8.23442	6.8066	40.1428	39.0623	31.0545	28.0616	22.9007	79.6071	20.2043	82.3732	30.1917	76.1175	25.4811	0.366637	-1.44758	1.55976e-06	8.15873e-05
ENSG00000275325.4_2	PDCD6IPP1	chr15	23128188	23145997	-	pseudogene	53.6043	84.9072	711.342	106.207	237.769	204.476	99.8423	102.508	65.3204	64.3271	45.2893	48.0925	111.093	59.5206	37.0812	44.26	52.1839	120.428	86.5706	56.5635	43.776	45.8013	25.0817	39.2862	200.082	59.0422	104.358	50.1382	0.295152	-1.76047	1.56112e-06	8.15873e-05
ENSG00000068366.19_3	ACSL4	chrX	108867473	108976632	-	protein_coding_gene	8029.92	2486.16	3859.41	3993.8	5402.81	2581.91	2857.34	3616.12	1679.06	1624.81	1358.68	1431.84	2998.51	1522.17	964.111	2831.61	1587.07	3252.6	1737.75	2083.98	1752.16	1196.29	973.823	782.356	4103.43	1736.05	3737.77	1605.94	0.423068	-1.24104	1.56995e-06	8.18722e-05
ENSG00000109099.13_3	PMP22	chr17	15133094	15168643	-	protein_coding_gene	4165.82	645.867	1306.06	781.526	1504.84	762.813	1013.86	921.479	577.175	425.89	425.102	337.74	882.791	457.626	303.006	326.289	647.761	698.896	731.627	570.071	631.946	572.517	287.894	227.86	1387.78	506.512	967.671	513.848	0.36492	-1.45435	1.57987e-06	8.23119e-05
ENSG00000076864.19_3	RAP1GAP	chr1	21922708	21995856	-	protein_coding_gene	897.488	1281.24	1720.04	781.526	540.384	1296.78	1417.35	679.386	2831.26	2539.81	2086.4	2123.72	3311.95	7349.33	3578.87	2102.86	1682.36	1391.62	4816.28	1235.52	2372.88	4387.11	3741.53	1160.63	1076.77	2919.51	1089.36	2456.35	2.71131	1.43899	1.61607e-06	8.41193e-05
ENSG00000162645.12_3	GBP2	chr1	89571815	89616139	-	protein_coding_gene	5170.51	2503.33	2673.54	4234.27	4653.48	3110.58	3362.73	9690.25	1984.24	1166.76	821.383	1371.73	3795.01	1469.48	579.526	2460.03	1362.45	1976.26	1280.61	2181.58	2027.17	1194.11	568.155	663.375	4424.84	1556.37	3798.5	1367.09	0.351747	-1.50739	1.62555e-06	8.45334e-05
ENSG00000072195.14_1	SPEG	chr2	220299568	220363009	+	protein_coding_gene	676.179	851.934	1103.96	646.262	1552.19	891.008	909.903	446.018	321.248	350.472	255.267	168.324	479.088	261.5	44.4974	79.2563	174.703	594.937	452.912	222.927	397.352	217.011	113.413	58.368	884.682	261.955	871.471	239.097	0.29613	-1.7557	1.63956e-06	8.51821e-05
ENSG00000260762.1_2	ACSM5P1	chr16	20597872	20618429	-	pseudogene	14.5497	8.58613	5.34175	13.0254	7.20512	2.11893	7.20512	14.1766	22.4874	38.8181	30.8791	36.0693	25.7894	33.1754	7.41624	18.5274	43.1085	13.3809	35.8951	8.8727	70.7151	51.2539	15.2671	41.5311	9.0261	30.8242	7.89562	32.0272	3.39775	1.76458	1.64752e-06	8.5515e-05
ENSG00000183960.8_3	KCNH8	chr3	19189946	19577138	+	protein_coding_gene	1775.83	1179.16	744.283	1348.63	2232.56	1176	417.897	531.077	22650.1	16893.6	13131.8	16725.2	24607.1	7809.88	91.1138	3569.62	9033.49	1471.9	1243.66	9911.92	3580.65	209.377	1338.05	7153.45	1175.68	8713.81	1177.58	7481.67	7.41163	2.88979	1.65115e-06	8.56234e-05
ENSG00000137094.14_3	DNAJB5	chr9	34989638	34998897	+	protein_coding_gene	771.136	453.157	771.882	419.82	949.017	455.569	569.204	335.876	320.177	265.072	286.146	133.347	362.043	217.592	158.919	181.157	147.476	249.091	551.096	196.309	289.595	340.238	123.227	121.226	590.708	246.42	512.387	233.341	0.417152	-1.26136	1.65459e-06	8.57218e-05
ENSG00000269190.5_3	FBXO17	chr19	39432041	39466550	-	protein_coding_gene	646.314	975.956	891.181	867.695	912.991	699.246	567.146	897.488	363.01	129.763	159.542	149.742	365.019	237.107	36.0217	71.0219	114.578	768.889	339.948	150.836	203.166	148.309	45.8013	42.6536	807.252	207.838	879.438	150.289	0.257515	-1.95727	1.70133e-06	8.80606e-05
ENSG00000239893.1_2	ZNF736P9Y	chrY	7936937	7938764	-	pseudogene	3.0631	7.63211	5.34175	7.0137	7.20512	13.773	13.3809	1.09051	2.14165	4.43635	1.0293	1.09301	0.9919	0.975748	1.05946	1.0293	2.26887	1.0293	1.05574	1.10909	1.12246	4.36203	1.09051	2.24492	7.31253	1.68998	7.10941	1.09176	0.230935	-2.11444	1.71569e-06	8.87213e-05
ENSG00000175063.16_3	UBE2C	chr20	44441215	44445596	+	protein_coding_gene	9.1893	11.4482	8.90291	21.0411	27.7912	5.29732	55.5823	14.1766	28.9123	32.1635	44.26	57.9295	43.6436	136.605	170.574	139.985	64.6627	45.2893	29.5607	34.3817	182.961	194.11	226.826	19.0819	19.1786	90.6841	12.8124	51.6094	4.73933	2.24468	1.75278e-06	9.0555e-05
ENSG00000084092.6_3	NOA1	chr4	57829536	57844989	-	protein_coding_gene	622.575	1161.03	1372.83	1033.02	726.687	1127.27	1272.22	1115.59	2335.47	1552.72	2362.25	2028.63	1387.67	2264.71	3120.12	2218.15	1753.83	1118.85	1806.37	1512.8	1838.59	1439.47	1467.82	1876.76	1053.9	1880.26	1121.43	1822.48	1.7843	0.835355	1.76124e-06	9.09071e-05
ENSG00000122548.5_2	KIAA0087	chr7	26572740	26578407	-	lncRNA	6.1262	3.81606	3.56116	2.00391	7.20512	14.8325	8.23442	3.27152	183.111	70.9816	509.505	107.115	385.849	634.236	2.11893	5.14651	6.8066	4.11721	1.05574	18.8545	92.0419	1.09051	28.3532	2.24492	6.13136	128.289	4.97113	23.6038	20.9503	4.3889	1.76293e-06	9.09099e-05
ENSG00000130303.12_3	BST2	chr19	17513748	17516457	-	protein_coding_gene	1353.12	727.913	1035.41	624.219	570.233	1195.07	1891.86	1368.59	548.263	356.017	403.486	313.694	579.27	586.424	278.639	284.087	457.177	802.856	339.948	709.816	617.354	532.168	365.32	136.94	1095.8	456.966	1115.24	430.332	0.417036	-1.26176	1.78223e-06	9.18196e-05
ENSG00000109805.9_3	NCAPG	chr4	17812525	17846485	+	protein_coding_gene	65.0909	43.8846	34.7213	123.241	142.044	33.9028	133.809	52.3444	115.649	114.236	173.952	187.998	205.323	228.325	512.78	466.274	181.509	263.501	143.581	102.036	436.638	292.256	713.192	122.348	78.6297	266.225	58.7176	196.661	3.38744	1.7602	1.80297e-06	9.28018e-05
ENSG00000177469.12_4	CAVIN1	chr17	40554470	40575535	-	protein_coding_gene	9127.27	6791.63	11272	5011.79	8656.43	7185.28	7187.62	4459.09	2770.23	2045.16	2264.46	1495.24	3809.89	2216.9	4661.64	892.405	1892.23	3106.43	6158.13	2362.36	4175.56	4262.79	1711.01	863.173	7461.38	2792.98	7186.45	2313.41	0.374322	-1.41765	1.80601e-06	9.28723e-05
ENSG00000282961.1_2	PRNCR1	chr8	128092119	128104845	+	lncRNA	55.9016	282.388	133.544	207.405	243.945	280.758	100.872	34.8962	335.169	629.962	777.123	465.622	1332.12	1361.17	273.341	1565.57	1357.92	347.904	1300.67	175.236	160.512	178.843	347.872	901.337	167.464	719.398	170.474	547.792	4.29678	2.10325	1.81976e-06	9.34922e-05
ENSG00000265859.1	MIR5704	chr3	131704699	131704775	-	miRNA	21.4417	104.942	88.1388	41.0802	90.5786	94.2922	28.8205	19.6291	173.474	221.818	228.505	307.136	447.347	215.64	51.9137	123.516	567.217	250.12	249.154	196.309	144.798	43.6203	245.364	88.6745	61.1153	222.163	64.6095	218.729	3.63596	1.86234	1.82208e-06	9.35249e-05
ENSG00000180875.4_3	GREM2	chr1	240652873	240775449	-	protein_coding_gene	206.759	1236.4	121.97	434.849	243.945	549.861	392.164	316.247	4705.21	862.87	8037.82	1162.96	1981.82	3152.64	3083.04	3735.34	660.24	689.632	6335.49	206.29	826.132	1067.61	121.046	7190.49	437.775	2738.66	354.206	1572.39	6.25612	2.64527	1.83428e-06	9.40644e-05
ENSG00000204065.2_3	TCEAL5	chrX	102528619	102531800	-	protein_coding_gene	80.4064	58.1949	43.6243	66.1292	25.7326	45.5569	49.4065	65.4305	35.3373	13.3091	28.8205	10.9301	21.8218	15.612	5.29732	7.20512	41.974	13.3809	16.8918	21.0727	26.9391	21.8102	2.18102	8.9797	54.3101	18.2227	53.8007	16.2519	0.334954	-1.57796	1.83599e-06	9.40649e-05
ENSG00000236536.1_3	AC003986.3	chr7	19159556	19161539	+	as_lncRNA	2.29733	1.90803	2.67087	7.0137	3.08791	1.05946	2.0586	1.09051	8.56661	15.5272	7.20512	22.9532	7.9352	54.6419	41.3191	8.23442	30.6297	4.11721	1.05574	18.8545	5.61231	4.36203	7.63355	58.368	2.6483	18.5635	2.17796	8.40051	6.99596	2.80652	1.83968e-06	9.4167e-05
ENSG00000123352.17_3	SPATS2	chr12	49760367	49921207	+	protein_coding_gene	1623.44	2196.14	1782.36	2246.39	3106.43	1940.94	1985.52	2467.82	2752.02	2557.56	4445.56	2766.41	3523.23	3501.96	3827.84	3249.51	4018.16	3726.07	3509.28	2882.52	2607.48	3064.33	3569.23	5274.45	2168.63	3454.72	2090.83	3505.62	1.59322	0.671948	1.85334e-06	9.47784e-05
ENSG00000135312.6_3	HTR1B	chr6	78171470	78173490	-	protein_coding_gene	6.1262	13.3562	25.8184	10.0196	5.14651	4.23785	3.08791	4.36203	2.14165	1.10909	1.0293	2.18602	3.9676	3.90299	1.05946	1.0293	1.13443	5.14651	3.16722	1.10909	2.24492	1.09051	1.09051	1.12246	9.01934	2.03319	5.63636	1.12845	0.225854	-2.14654	1.85953e-06	9.50074e-05
ENSG00000211898.7_3	IGHD	chr14	106303099	106312011	-	protein_coding_gene	79.6406	20.9883	0.890291	12.0235	98.813	9.53517	164.688	5.45254	1.07083	15.5272	1.0293	2.18602	8.9271	3.90299	1.05946	5.14651	4.53773	5.14651	16.8918	8.8727	11.2246	1.09051	4.36203	11.2246	49.004	6.3875	16.5059	4.84212	0.130173	-2.9415	1.86538e-06	9.52184e-05
ENSG00000176438.12_3	SYNE3	chr14	95873603	95942173	-	protein_coding_gene	557.484	269.986	327.627	435.851	486.86	291.352	439.512	376.225	172.403	170.8	227.476	127.882	318.4	256.622	110.184	223.359	277.936	270.706	280.827	170.8	157.145	211.559	194.11	103.267	398.112	204.592	406.038	202.834	0.513982	-0.96021	1.88881e-06	9.63261e-05
ENSG00000051523.10_3	CYBA	chr16	88709691	88717560	-	protein_coding_gene	1016.95	456.019	450.487	598.168	479.655	511.721	1457.49	744.817	219.519	336.054	163.659	213.137	327.327	450.795	305.125	349.963	241.634	346.875	224.872	374.872	524.19	372.954	308.614	95.4093	714.413	303.437	554.945	317.97	0.424742	-1.23534	1.8998e-06	9.67093e-05
ENSG00000159176.13_3	CSRP1	chr1	201452658	201478584	-	protein_coding_gene	22060.5	20954.9	36805.5	19470	33563.5	22681	28130.8	10441.6	13290	10625.1	10448.4	7177.8	15328.8	8072.36	6638.6	3665.35	5336.37	9775.28	20620.7	6804.25	10788	10622.6	2607.4	4807.5	24263.5	9163.04	22370.7	8923.82	0.377648	-1.40489	1.89982e-06	9.67093e-05
ENSG00000155755.18_3	TMEM237	chr2	202484907	202508293	-	protein_coding_gene	1932.82	2737.07	2958.44	2994.85	2460.03	2415.58	2114.19	2013.08	1449.9	1114.63	1467.78	1745.54	1703.09	1866.61	1059.46	1228.99	1110.61	2048.31	1440.03	1761.23	1151.65	1311.88	579.06	1187.56	2453.26	1389.15	2437.8	1375.95	0.56628	-0.820414	1.92589e-06	9.78566e-05
ENSG00000122863.5_3	CHST3	chr10	73724123	73773322	+	protein_coding_gene	1791.91	782.291	1209.91	806.575	1304.13	600.716	961.368	943.289	622.15	295.017	357.168	218.602	582.245	376.639	97.4706	204.831	188.316	591.849	639.778	270.617	525.312	499.453	170.119	87.552	1050.02	357.945	952.329	326.093	0.340893	-1.55261	1.92428e-06	9.78566e-05
ENSG00000239614.1_2	HMGN1P7	chr3	93707478	93707790	-	pseudogene	9.95508	8.58613	14.2447	12.0235	3.08791	21.1893	7.20512	5.45254	38.5497	12.2	53.5237	33.8833	23.8056	27.3209	36.0217	40.1428	30.6297	13.3809	34.8394	31.0545	23.5717	26.1722	6.54305	42.6536	10.218	29.6433	9.2706	30.8421	2.89726	1.53469	1.93205e-06	9.808e-05
ENSG00000230345.1_3	AL121580.1	chr22	48256420	48257811	+	lncRNA	0.765775	5.72408	3.56116	1.00196	1.0293	1.05946	2.0586	2.18102	35.3373	17.7454	33.967	18.5812	64.4735	50.7389	1.05946	1.0293	43.1085	1.0293	3.16722	28.8363	22.4492	1.09051	17.4481	3.36739	2.17267	21.4643	1.55903	18.1633	9.87228	3.30338	1.94467e-06	9.86301e-05
ENSG00000108622.10_3	ICAM2	chr17	62079954	62097994	-	protein_coding_gene	322.391	137.378	146.898	211.413	150.278	150.444	334.523	220.283	80.312	133.091	104.989	78.6967	101.174	142.459	84.757	127.633	96.4268	179.099	73.9017	131.981	110.001	73.064	104.689	62.8579	209.201	105.321	180.928	102.931	0.50342	-0.990166	1.95273e-06	9.88582e-05
ENSG00000204544.5_3	MUC21	chr6	30951495	30957680	+	protein_coding_gene	75.8117	5.72408	3.56116	1.00196	3.08791	6.35678	1.0293	3.27152	2.14165	2.21818	2.0586	1.09301	0.9919	0.975748	1.05946	3.08791	1.13443	2.0586	1.05574	1.10909	1.12246	1.09051	1.09051	1.12246	12.4806	1.46314	3.41634	1.11577	0.115791	-3.1104	1.95216e-06	9.88582e-05
ENSG00000200991.1	SNORA25	chr15	85395729	85395846	-	snoRNA	1.53155	4.77007	2.67087	1.00196	2.0586	3.17839	4.11721	1.09051	37.4789	17.7454	93.6665	34.9763	14.8785	48.7874	12.7136	6.17581	2.26887	2.0586	5.2787	6.65453	15.7145	7.63355	1.09051	19.0819	2.5524	20.3877	2.36474	13.796	8.00732	3.00132	1.96506e-06	9.93093e-05
ENSG00000121361.3_3	KCNJ8	chr12	21917889	21928515	-	protein_coding_gene	402.032	525.662	796.81	556.086	663.9	788.241	864.614	815.7	285.911	279.49	290.263	194.556	351.133	252.719	52.9732	127.633	283.608	450.834	418.073	304.999	483.781	326.062	151.581	213.268	676.631	279.18	726.07	284.759	0.412652	-1.277	1.96523e-06	9.93093e-05
ENSG00000162975.4_3	KCNF1	chr2	11052063	11054351	+	protein_coding_gene	14.5497	4.77007	8.01262	1.00196	7.20512	5.29732	3.08791	3.27152	1.07083	1.10909	1.0293	1.09301	1.9838	1.9515	1.05946	1.0293	1.13443	1.0293	1.05574	1.10909	1.12246	1.09051	1.09051	2.24492	5.89953	1.2627	5.03369	1.09176	0.209046	-2.25811	1.97323e-06	9.96227e-05
ENSG00000118193.11_3	KIF14	chr1	200520625	200589862	-	protein_coding_gene	87.2984	35.2985	19.5864	66.1292	82.3442	26.4866	68.9632	52.3444	81.3828	69.8725	152.337	79.7898	105.141	193.198	268.044	246.003	113.443	169.835	105.574	73.1998	212.145	262.812	357.687	90.9194	54.8064	161.337	59.2368	132.89	2.94243	1.55701	1.97528e-06	9.96359e-05
ENSG00000198353.7_3	HOXC4	chr12	54410715	54449814	+	protein_coding_gene	31.3968	14.3102	156.691	70.137	10.293	315.72	155.425	14.1766	34.2664	208.508	68.9632	465.622	553.48	124.896	928.09	482.743	1338.63	657.724	1279.56	877.288	422.046	475.461	1133.04	677.967	96.0187	608.017	50.7669	518.111	6.33397	2.66311	1.99784e-06	0.000100682
ENSG00000196378.11_3	ZNF34	chr8	145998499	146012730	-	protein_coding_gene	225.904	338.675	340.091	242.474	250.12	323.136	257.326	268.265	145.632	153.054	136.897	165.045	184.493	233.204	115.481	199.685	134.998	186.304	206.925	171.909	129.083	258.45	199.563	185.206	280.749	175.371	262.795	178.201	0.624944	-0.678201	2.00241e-06	0.000100821
ENSG00000114638.7_3	UPK1B	chr3	118892364	118924000	+	protein_coding_gene	145.497	6.6781	78.3456	6.01174	8.23442	3.17839	11.3223	10.9051	13.9207	11.0909	2.0586	3.27903	2.9757	4.87874	1.05946	3.08791	4.53773	2.0586	1.05574	3.32726	4.48985	2.18102	13.0861	2.24492	33.7716	4.70827	9.56975	3.18347	0.138555	-2.85147	2.00861e-06	0.000101041
ENSG00000181104.6_3	F2R	chr5	76011868	76031606	+	protein_coding_gene	551.358	361.571	383.715	445.871	606.259	296.65	534.208	354.415	804.191	777.47	981.954	974.965	1775.5	1878.31	3157.2	1075.62	633.014	958.28	395.902	880.616	1300.93	2324.96	1027.26	401.841	441.756	1209.25	414.793	978.46	2.73729	1.45275	2.02533e-06	0.00010179
ENSG00000278965.1_3	AC122713.2	chr5	179505357	179508691	-	protein_coding_gene	13.0182	55.3328	33.8311	79.1546	41.1721	34.9623	13.3809	25.0817	7.49578	5.54544	14.4102	10.9301	7.9352	12.6847	6.35678	8.23442	12.4788	27.7912	28.505	14.4181	8.9797	10.9051	4.36203	8.9797	36.9917	11.8758	34.3967	9.94239	0.321884	-1.63539	2.05166e-06	0.00010302
ENSG00000122778.9_3	KIAA1549	chr7	138516126	138666064	-	protein_coding_gene	651.675	1079.94	986.442	987.93	1527.48	922.792	861.526	1276.98	3362.39	1672.5	7914.3	3471.4	3733.51	2160.31	4315.19	3847.53	1601.82	1658.21	2509.49	725.343	1947.47	3043.61	1974.91	1214.5	1036.85	2822.03	987.186	2334.9	2.72195	1.44464	2.0645e-06	0.000103431
ENSG00000174370.9_3	C11orf45	chr11	128769460	128775930	-	protein_coding_gene	58.1989	63.9189	117.518	74.1448	52.4944	101.708	92.6372	61.0684	21.4165	32.1635	7.20512	27.3253	38.6841	30.2482	21.1893	8.23442	23.8231	39.1135	26.3935	35.4908	71.8376	18.5386	18.5386	3.36739	77.7112	26.4731	69.0319	25.1083	0.340569	-1.55398	2.06292e-06	0.000103431
ENSG00000259207.7_3	ITGB3	chr17	45331212	45389182	+	protein_coding_gene	1338.57	377.79	650.803	287.562	1154.88	465.104	542.442	659.757	387.639	248.436	315.996	126.789	401.719	216.616	88.9949	198.655	139.535	401.428	400.125	166.363	255.921	116.684	145.038	61.7354	684.614	229.48	596.622	207.636	0.335212	-1.57685	2.06544e-06	0.000103431
ENSG00000080031.9_4	PTPRH	chr19	55692616	55720874	-	protein_coding_gene	498.52	12.4022	13.3544	8.01566	10.293	10.5946	8.23442	10.9051	8.56661	1.10909	3.08791	5.46505	5.9514	19.515	9.53517	4.11721	4.53773	6.17581	6.33443	3.32726	14.592	7.63355	23.9912	3.36739	71.5399	7.95667	10.7499	6.06361	0.111037	-3.17089	2.08085e-06	0.000104108
ENSG00000065320.8_3	NTN1	chr17	8924859	9147317	+	protein_coding_gene	545.232	522.8	673.95	331.648	640.226	598.597	416.867	275.898	204.528	230.69	182.186	194.556	223.177	168.804	19.0703	95.7251	80.5447	425.102	242.82	182.999	112.246	113.413	90.5121	55.0006	500.652	163.836	534.016	175.495	0.327286	-1.61138	2.08931e-06	0.000104437
ENSG00000022267.16_3	FHL1	chrX	135228861	135293518	+	protein_coding_gene	6149.17	5163.12	9283.95	3227.3	7825.78	5154.29	5114.6	4787.33	2580.69	2410.05	1467.78	1225.26	3532.16	1060.64	443.915	696.838	1517.87	2561.93	4805.72	1136.81	3414.53	1858.23	743.726	1520.94	5838.19	1936.07	5158.71	1519.4	0.33162	-1.5924	2.09175e-06	0.000104465
ENSG00000268388.5_2	FENDRR	chr16	86508135	86542705	-	lncRNA	2014.75	941.612	930.354	1165.28	3114.67	857.106	988.13	620.499	644.637	547.889	377.754	412.065	731.03	303.458	121.838	157.483	182.644	808.002	783.358	408.144	227.86	352.234	150.49	122.348	1329.05	395.702	964.871	364.994	0.297746	-1.74785	2.1241e-06	0.000105985
ENSG00000164778.4_3	EN2	chr7	155250824	155257526	+	protein_coding_gene	1.53155	0.954014	3.56116	2.00391	1.0293	2.11893	1.0293	2.18102	4.28331	4.43635	16.4688	39.3484	18.8461	5.85449	32.8434	3.08791	23.8231	1.0293	1.05574	19.9636	21.3268	2.18102	21.8102	6.73477	1.80115	13.9433	1.76773	11.6018	7.71157	2.94702	2.14299e-06	0.000106832
ENSG00000106462.10_3	EZH2	chr7	148504475	148581413	-	protein_coding_gene	625.638	590.535	401.521	710.388	1068.42	493.71	551.706	251.907	848.094	550.107	1906.27	1124.71	2104.81	997.214	2362.6	3258.77	1506.53	1172.38	1808.48	652.144	1015.83	1264.99	2002.17	1318.89	586.728	1493.37	571.12	1291.94	2.54528	1.34782	2.1451e-06	0.000106841
ENSG00000084734.8_3	GCKR	chr2	27719709	27746551	+	protein_coding_gene	37.523	29.5744	32.9408	22.0431	36.0256	28.6055	9.26372	33.8057	17.1332	3.32726	13.3809	3.27903	11.9028	4.87874	4.23785	5.14651	11.3443	15.4395	10.5574	8.8727	12.3471	21.8102	16.3576	3.36739	28.7227	10.2114	31.2576	10.9509	0.354908	-1.49448	2.14833e-06	0.000106905
ENSG00000174807.3_3	CD248	chr11	66081958	66084515	-	protein_coding_gene	155.452	29.5744	96.1514	62.1213	89.5493	60.3894	104.989	35.9868	28.9123	34.3817	55.5823	17.4882	46.6193	31.2239	14.8325	17.4981	32.8986	41.1721	48.564	17.7454	17.9594	22.9007	31.6247	11.2246	79.2767	29.4142	75.8353	30.0681	0.370829	-1.43117	2.25935e-06	0.000112329
ENSG00000253374.5_4	AC023644.1	chr8	82433853	82445510	+	as_lncRNA	2.29733	4.77007	0.890291	2.00391	2.0586	2.11893	4.11721	3.27152	4.28331	17.7454	2.0586	15.3021	0.9919	24.3937	1294.66	60.7288	2.26887	2.0586	2.11148	1.10909	1.12246	6.54305	5.45254	135.818	2.69098	98.5407	2.20813	4.86792	36.6664	5.19638	2.2684e-06	0.000112678
ENSG00000171056.7_3	SOX7	chr8	10581278	10588022	-	protein_coding_gene	421.176	104.942	133.544	70.137	130.721	148.325	98.813	65.4305	82.4536	51.018	46.3186	62.3016	72.4087	47.8116	13.773	50.4358	35.1674	47.3479	86.5706	37.709	32.5514	27.2627	73.064	13.4695	146.636	48.729	117.831	47.5798	0.331992	-1.59078	2.28386e-06	0.000113344
ENSG00000131096.10_3	PYY	chr17	42030106	42081837	-	protein_coding_gene	26.8021	28.6204	28.4893	26.0509	41.1721	14.8325	21.6153	37.0773	9.63744	17.7454	14.4102	12.0231	12.8947	7.80598	20.1298	11.3223	3.4033	16.4688	19.0033	17.7454	12.3471	6.54305	13.0861	4.48985	28.0825	12.441	27.6457	12.6209	0.443847	-1.17187	2.2999e-06	0.000114039
ENSG00000206073.10_3	SERPINB4	chr18	61304493	61311532	-	protein_coding_gene	108.74	4.77007	5.34175	76.1487	15.4395	15.8919	17.4981	695.744	13.9207	11.0909	4.11721	13.1161	20.8299	7.80598	1.05946	32.9377	6.8066	4.11721	4.22296	47.6908	13.4695	2.18102	4.36203	3.36739	117.447	11.9435	16.695	7.30629	0.101737	-3.29709	2.31996e-06	0.00011493
ENSG00000225511.6_2	LINC00475	chr9	94903580	94922396	+	lncRNA	35.9914	31.4825	46.2951	43.0842	39.1135	52.9732	39.1135	50.1634	33.1956	16.6363	15.4395	19.6742	22.8137	22.4422	5.29732	12.3516	10.2099	22.6446	27.4492	21.0727	32.5514	14.1766	5.45254	7.85723	42.2771	18.079	41.0988	18.1553	0.42862	-1.22223	2.36312e-06	0.000116964
ENSG00000232526.1_2	VDAC1P13	chr2	42690279	42691137	-	pseudogene	4.59465	3.81606	1.78058	3.00587	7.20512	1.05946	1.0293	1.09051	29.9831	49.9089	29.8498	31.6973	47.6112	56.5934	1.05946	17.4981	19.2854	21.6153	1.05574	23.2908	6.73477	1.09051	10.9051	3.36739	2.94769	21.9716	2.39323	20.4504	7.40911	2.8893	2.39443e-06	0.000118305
ENSG00000170961.6_3	HAS2	chr8	122624356	122653630	-	protein_coding_gene	4868.8	312.917	422.888	226.442	237.769	176.93	185.274	129.77	316.965	97.5997	48.3772	106.022	144.817	59.5206	44.4974	321.142	97.5612	224.388	46.4525	281.708	68.4702	68.702	41.4393	41.5311	820.099	125.575	232.106	83.1316	0.153094	-2.70751	2.39447e-06	0.000118305
ENSG00000225206.8_3	MIR137HG	chr1	98452296	98515419	-	lncRNA	39.8203	10.4942	15.1349	13.0254	7.20512	11.6541	18.5274	17.4481	31.054	19.9636	8.23442	18.5812	238.056	14.6362	3.17839	13.3809	10.2099	21.6153	9.50165	4995.33	4505.56	3.27152	273.717	5.61231	16.6637	635.744	14.0802	16.6087	38.1214	5.25253	2.41114e-06	0.00011894
ENSG00000102034.16_3	ELF4	chrX	129198849	129244691	-	protein_coding_gene	785.685	326.273	321.395	299.585	398.34	281.817	325.26	191.929	123.145	138.636	107.047	101.65	225.161	212.713	129.254	147.19	90.7546	308.791	173.141	99.8179	138.063	185.386	129.77	32.5514	366.286	146.442	323.327	133.917	0.399766	-1.32277	2.41164e-06	0.00011894
ENSG00000267723.1_4	AC011509.2	chr19	14365001	14404017	-	lncRNA	20.6759	20.9883	24.0379	39.0763	60.7288	30.7244	26.7619	14.1766	18.204	19.9636	13.3809	4.37204	14.8785	9.75748	2.11893	8.23442	11.3443	18.5274	15.8361	8.8727	8.9797	6.54305	8.72406	5.61231	29.6463	10.9593	25.3999	9.36859	0.370917	-1.43083	2.41709e-06	0.000119103
ENSG00000169710.8_1	FASN	chr17	80036209	80056208	-	protein_coding_gene	3792.88	10616.3	6125.2	8526.65	4637.01	6347.24	5049.76	2845.13	8034.41	7896.7	21564.9	11601.2	17479.3	9853.1	74044.8	40672.9	7060.71	22938	46272	3162.01	20624.1	38959.5	16069.7	21316.7	5992.52	22971.9	5587.48	19051.7	3.83343	1.93864	2.42282e-06	0.000119241
ENSG00000070669.16_3	ASNS	chr7	97481430	97501854	-	protein_coding_gene	806.361	730.775	782.566	834.63	669.046	698.186	734.922	828.786	1135.08	809.634	1487.34	1136.73	1102.99	1696.83	1964.24	1872.3	2728.31	834.764	955.444	1462.89	1218.99	1461.28	2972.72	1384	760.659	1513.97	758.744	1422.64	1.99026	0.992955	2.42418e-06	0.000119241
ENSG00000272574.1_4	AL596325.2	chr1	162562893	162563544	+	lncRNA	85.7668	47.7007	36.5019	61.1194	71.0219	43.438	42.2014	26.1722	98.516	80.9634	352.021	185.812	231.113	92.696	157.86	213.066	111.174	164.688	168.918	58.7816	38.1637	69.7925	119.956	182.961	51.7403	145.405	45.5693	138.908	2.80681	1.48893	2.42661e-06	0.000119255
ENSG00000119729.11_3	RHOQ	chr2	46768945	46810260	+	protein_coding_gene	8451.86	6620.86	6269.43	7788.21	6653.41	5905.45	4434.23	7601.93	4240.47	3982.73	2958.21	3594.91	4092.58	3682.47	3873.4	5429.57	4690.88	5366.78	4524.9	4827.86	4192.4	4750.25	2544.15	5375.47	6715.67	4257.94	6637.13	4216.43	0.634013	-0.657415	2.46667e-06	0.000121116
ENSG00000184454.6_3	NCMAP	chr1	24882602	24935819	+	protein_coding_gene	395.14	1383.32	200.315	604.18	507.446	667.462	438.483	544.163	262.352	45.4726	84.4028	114.766	131.923	148.314	325.255	107.047	445.832	353.051	220.649	72.0907	43.776	81.7881	85.0596	123.471	592.564	165.328	525.805	119.118	0.279022	-1.84155	2.47731e-06	0.000121531
ENSG00000124145.6_3	SDC4	chr20	43953928	43977064	-	protein_coding_gene	8430.42	4236.78	4890.37	3539.91	2962.33	3592.64	2924.25	3321.69	2513.23	1533.87	884.171	2482.23	2481.73	2023.7	2219.58	1295.89	1827.57	1881.56	2248.72	2045.16	2815.13	1901.85	731.731	675.722	4237.3	1847.62	3566.28	1962.77	0.436015	-1.19755	2.48314e-06	0.000121709
ENSG00000117399.13_3	CDC20	chr1	43824626	43828874	+	protein_coding_gene	8.42353	14.3102	3.56116	15.0294	13.3809	9.53517	43.2307	6.54305	24.629	18.8545	24.7033	32.7903	29.757	121.968	132.433	69.9926	36.3019	30.8791	36.9509	31.0545	176.227	151.581	357.687	15.7145	14.2518	80.7201	11.458	34.5461	5.67485	2.50458	2.48921e-06	0.000121899
ENSG00000258942.1_3	AL358332.1	chr14	51811632	51852321	-	lncRNA	40.5861	12.4022	10.6835	39.0763	109.106	10.5946	13.3809	8.72406	12.8499	13.3091	10.293	5.46505	7.9352	3.90299	3.17839	7.20512	1.13443	7.20512	15.8361	7.76361	3.36739	6.54305	4.36203	4.48985	30.5692	7.17752	12.8916	6.87408	0.235004	-2.08924	2.49148e-06	0.000121902
ENSG00000228010.5_4	AC073343.2	chr7	6703605	6748532	+	as_lncRNA	214.417	336.767	310.712	336.658	465.245	372.931	266.589	293.347	194.89	200.745	206.89	167.231	219.21	230.276	80.5192	103.96	115.712	230.564	133.023	173.018	125.716	130.861	52.3444	88.6745	324.583	153.352	323.685	150.127	0.472778	-1.08077	2.54208e-06	0.000124268
ENSG00000186310.9_3	NAP1L3	chrX	92925929	92928567	-	protein_coding_gene	213.651	265.216	421.108	297.581	424.073	272.282	294.38	139.585	155.27	115.345	93.6665	97.2779	154.736	132.702	87.9354	65.8753	127.057	149.249	98.1837	210.727	222.247	242.093	82.8786	79.6948	290.984	132.184	283.331	121.201	0.454161	-1.13872	2.58589e-06	0.000126299
ENSG00000181585.3_3	TMIE	chr3	46742823	46752376	+	protein_coding_gene	21.4417	19.0803	38.2825	10.0196	25.7326	19.0703	21.6153	10.9051	8.56661	8.8727	1.0293	5.46505	7.9352	5.85449	2.11893	3.08791	3.4033	13.3809	14.7803	14.4181	2.24492	5.45254	2.18102	2.24492	20.7684	6.31477	20.261	5.4588	0.303691	-1.71932	2.59556e-06	0.000126659
ENSG00000136274.8_3	NACAD	chr7	45120037	45128513	-	protein_coding_gene	85.7668	36.2525	67.6621	59.1155	99.8423	52.9732	49.4065	31.6247	23.5582	23.2908	24.7033	16.3952	26.7813	52.6904	15.8919	11.3223	18.1509	25.7326	39.0623	11.0909	14.592	10.9051	38.1678	5.61231	60.3305	22.3717	56.0443	20.7209	0.371305	-1.42932	2.61462e-06	0.000127477
ENSG00000114270.17_3	COL7A1	chr3	48601506	48632700	-	protein_coding_gene	2380.79	1189.66	1166.28	1455.84	2621.63	1031.92	1142.53	439.475	396.206	336.054	521.856	349.763	947.264	350.293	328.434	322.172	600.115	946.958	620.775	584.489	535.414	371.863	133.042	70.7151	1428.52	463.463	1177.97	384.034	0.324439	-1.62398	2.62893e-06	0.000128062
ENSG00000142623.9_3	PADI1	chr1	17531621	17572500	+	protein_coding_gene	300.95	17.1723	3.56116	11.0215	4.11721	10.5946	19.5567	14.1766	8.56661	14.4181	2.0586	6.55806	7.9352	11.709	5.29732	10.293	4.53773	6.17581	7.39017	5.54544	7.85723	6.54305	5.45254	6.73477	47.6437	7.31704	12.5991	6.64642	0.153017	-2.70824	2.66776e-06	0.00012984
ENSG00000213244.3	HIST2H3DP1	chr1	120904675	120905090	+	pseudogene	19.1444	12.4022	41.8437	10.0196	20.586	22.2487	28.8205	33.8057	13.9207	5.54544	14.4102	4.37204	8.9271	8.78173	1.05946	6.17581	5.67217	10.293	12.6689	15.5272	6.73477	4.36203	1.09051	3.36739	23.6088	7.68178	21.4174	6.45529	0.32641	-1.61524	2.67201e-06	0.000129932
ENSG00000270788.1_2	PDLIM1P1	chr14	50517086	50518054	+	pseudogene	115.632	19.0803	38.2825	14.0274	23.674	31.7839	25.7326	34.8962	16.0624	9.98179	10.293	9.83709	9.919	17.5635	12.7136	12.3516	9.07546	14.4102	20.059	5.54544	11.2246	10.9051	8.72406	29.184	37.8886	12.9906	28.7582	11.0648	0.34083	-1.55288	2.68223e-06	0.000130315
ENSG00000280997.1_2	CCAT2	chr8	128412644	128414395	+	lncRNA	8.42353	17.1723	10.6835	19.0372	11.3223	13.773	6.17581	1.09051	36.4081	19.9636	58.6702	24.0462	88.2791	51.7146	23.3082	88.52	103.233	14.4102	70.7345	23.2908	10.1022	23.9912	19.6291	30.3065	10.9598	42.913	11.0029	27.1764	3.91397	1.96863	2.69424e-06	0.000130784
ENSG00000168389.17_3	MFSD2A	chr1	40420784	40435640	+	protein_coding_gene	346.13	37.2065	27.599	34.0665	54.553	24.3677	39.1135	284.623	25.6998	35.4908	17.4981	13.1161	27.7732	38.0542	32.8434	61.7581	19.2854	21.6153	19.0033	23.2908	24.6942	11.9956	15.2671	21.3268	105.957	25.5445	38.16	22.4531	0.241033	-2.0527	2.71257e-06	0.000131558
ENSG00000166839.16_4	ANKDD1A	chr15	65204101	65251042	+	protein_coding_gene	735.144	362.525	1210.8	390.763	853.292	809.43	423.043	278.079	319.106	210.727	325.26	184.719	462.225	429.329	109.125	150.278	229.155	358.197	192.145	204.072	208.778	205.015	157.033	74.0825	632.884	238.703	579.094	206.897	0.377215	-1.40654	2.72314e-06	0.000131956
ENSG00000210825.1	SNORA40	chr11	93468277	93468402	-	snoRNA	145.497	166.952	203.877	173.339	178.069	152.563	130.721	147.219	857.732	607.78	360.256	254.671	241.032	363.954	235.201	480.684	400.455	261.443	186.866	432.544	178.471	207.196	293.347	420.923	162.28	361.41	159.758	326.801	2.22677	1.15495	2.753e-06	0.000133286
ENSG00000186910.3_3	SERPINA11	chr14	94908801	94919127	-	protein_coding_gene	8.42353	6.6781	3.56116	9.01761	1.0293	25.4271	30.8791	8.72406	133.853	104.254	58.6702	139.905	176.558	706.441	6.35678	7.20512	12.4788	25.7326	182.643	197.418	90.9194	15.2671	10.9051	2.24492	11.7175	116.928	8.57379	74.7948	10.0001	3.32194	2.78227e-06	0.000134586
ENSG00000132386.10_3	SERPINF1	chr17	1665253	1680868	+	protein_coding_gene	2499.49	1516.88	1498.36	3755.34	4860.37	1900.68	3186.72	5448.18	1094.38	997.07	1398.82	813.2	1418.42	1011.85	276.52	556.853	1110.61	1090.03	1955.23	712.034	2243.8	707.74	243.183	355.82	3083.25	999.098	2843.1	1004.46	0.324051	-1.62571	2.78811e-06	0.000134751
ENSG00000261603.1_3	PRSS46	chr3	46761073	46777919	-	protein_coding_gene	13.784	16.2182	30.2699	38.0744	24.7033	20.1298	7.20512	16.3576	5.35413	4.43635	3.08791	6.55806	13.8866	7.80598	3.17839	18.5274	4.53773	11.3223	6.33443	4.43635	5.61231	1.09051	2.18102	2.24492	20.8428	6.28715	18.2437	4.94593	0.303908	-1.7183	2.79981e-06	0.000135198
ENSG00000157456.7_3	CCNB2	chr15	59397277	59417244	+	protein_coding_gene	103.38	157.412	56.0883	86.1683	66.9046	81.5787	107.047	40.3488	115.649	100.927	132.78	173.789	154.736	324.924	446.034	213.066	154.283	138.956	156.249	195.199	367.045	440.565	388.221	177.349	87.366	229.986	83.8735	175.569	2.63086	1.39554	2.81156e-06	0.000135647
ENSG00000164440.14_3	TXLNB	chr6	139561198	139613276	-	protein_coding_gene	82.7037	137.378	124.641	113.221	73.0805	78.4003	110.135	124.318	258.069	149.727	905.786	144.277	251.943	348.342	1729.04	752.42	347.137	136.897	158.361	90.9452	230.105	512.539	112.322	1265.01	105.485	462.058	111.678	255.006	4.38047	2.13109	2.81993e-06	0.000135933
ENSG00000182718.16_3	ANXA2	chr15	60639333	60695082	-	protein_coding_gene	24305.7	7836.27	6996.8	11360.2	9796.9	6897.1	5905.11	14359.8	7598.58	2443.32	2679.27	2532.51	3956.69	4008.37	4631.97	7133.06	1921.73	4575.25	4998.92	2418.92	6641.61	4315.14	2968.36	984.399	10932.2	3988.01	8816.58	3982.53	0.364792	-1.45485	2.82424e-06	0.000136022
ENSG00000215241.3_3	LINC02449	chr12	8388011	8395160	+	lncRNA	65.8567	179.355	151.349	114.223	110.135	96.4111	104.989	77.426	67.4621	25.509	31.9084	21.8602	36.7003	57.5691	5.29732	14.4102	13.6132	74.1098	32.7279	44.3635	28.0616	59.9779	8.72406	5.61231	112.468	32.9942	107.562	29.985	0.29363	-1.76793	2.8294e-06	0.000136152
ENSG00000283267.1_3	FAM237B	chr7	89945817	89950622	-	protein_coding_gene	3.0631	0.954014	1.78058	5.00979	2.0586	1.05946	5.14651	14.1766	4.28331	1.10909	1.0293	5.46505	0.9919	3.90299	1.05946	1.0293	1.13443	2.0586	2.11148	9.98179	3.36739	4.36203	6582.3	1.12246	4.15608	414.082	2.56085	2.08504	99.8237	6.64131	2.86605e-06	0.000137797
ENSG00000257002.1_3	AP000438.1	chr11	62677018	62685833	+	as_lncRNA	12.2524	40.0686	24.9281	58.1135	31.9084	46.6164	32.9377	44.7108	98.516	59.8907	121.458	42.6274	40.6679	192.222	173.752	108.077	61.2594	63.8167	98.1837	56.5635	48.2659	190.839	118.865	223.37	36.442	106.148	36.5031	98.3499	2.92088	1.5464	2.89644e-06	0.000139137
ENSG00000227161.1_4	AC092755.1	chr15	59936497	59964501	-	lncRNA	4965.29	4529.66	6360.24	5736.2	5905.11	4429.62	4674.06	4970.53	3963.13	4116.93	3604.62	4067.09	3894.2	3805.42	3425.24	3127.02	3059.57	4055.45	3868.23	4756.88	3662.59	3866.94	2541.97	2852.18	5196.34	3666.72	4967.91	3836.18	0.705629	-0.503018	2.90391e-06	0.000139375
ENSG00000163069.12_3	SGCB	chr4	52886872	52904648	-	protein_coding_gene	2517.1	2913.56	3411.59	3925.67	3619.03	2825.59	2357.1	2106.86	1344.96	1614.83	726.687	1381.57	1402.55	1163.09	2112.57	588.761	1022.12	1906.27	2056.58	1684.7	1917.17	1246.45	2285.7	837.357	2959.56	1455.71	2869.57	1392.06	0.491859	-1.02368	2.91332e-06	0.000139706
ENSG00000265678.1_3	AC129510.1	chr17	80111306	80112691	+	as_lncRNA	2.29733	4.77007	3.56116	3.00587	2.0586	2.11893	1.0293	2.18102	4.28331	8.8727	18.5274	9.83709	12.8947	24.3937	27.546	19.5567	4.53773	6.17581	3.16722	2.21818	13.4695	20.7196	5.45254	13.4695	2.62778	12.1951	2.23917	11.3659	4.62296	2.20882	2.92889e-06	0.000140331
ENSG00000240929.2_2	HIST2H2BB	chr1	149369722	149399226	-	pseudogene	238.156	887.233	1870.5	462.904	838.881	395.18	447.746	511.448	288.052	125.327	86.4614	238.276	415.606	68.3023	379.288	137.926	385.707	344.816	244.931	155.272	92.0419	294.437	158.124	129.083	706.506	221.478	487.176	198.2	0.313475	-1.67358	2.95039e-06	0.000141239
ENSG00000234715.1_3	AC005064.1	chr7	103085654	103154454	+	as_lncRNA	239.688	2077.84	577.799	1342.62	203.802	1663.36	391.135	75.245	800.978	2772.72	4815.08	2294.23	2335.92	1111.38	12237.9	2256.23	9490.67	1050.92	22721.6	875.07	2929.63	3169.02	4770.97	9937.16	821.436	5223.09	484.467	2851.17	6.35856	2.6687	2.98563e-06	0.000142803
ENSG00000229694.6_3	LINC00484	chr9	93881344	93945044	+	lncRNA	55.1358	46.7467	76.565	36.0705	48.3772	42.3785	47.3479	42.5298	29.9831	36.5999	19.5567	49.1855	15.8704	23.4179	22.2487	21.6153	14.7476	16.4688	16.8918	12.2	34.7963	15.2671	7.63355	12.3471	49.3939	21.8019	47.0473	18.2243	0.440334	-1.18333	2.9949e-06	0.000143123
ENSG00000110811.19_3	P3H3	chr12	6937575	6949015	+	protein_coding_gene	467.889	393.054	580.47	414.81	378.783	550.921	628.904	342.419	222.732	103.145	146.161	116.952	227.145	104.405	54.0326	57.6409	115.712	234.681	249.154	192.981	214.39	134.132	443.837	37.0412	469.656	165.884	441.349	140.147	0.353198	-1.50145	3.00007e-06	0.000143246
ENSG00000122133.16_3	PAEP	chr9	138453602	138458801	+	protein_coding_gene	0.765775	9.54014	1.78058	1.00196	2.0586	1.05946	1.0293	110.141	1.07083	1.10909	1.0293	1.09301	0.9919	1.9515	1.05946	1.0293	1.13443	1.0293	1.05574	1.10909	1.12246	1.09051	1.09051	4.48985	15.9221	1.34102	1.42002	1.09051	0.084457	-3.56564	3.0098e-06	0.000143587
ENSG00000256940.1_3	AP001453.2	chr11	64013436	64015689	+	as_lncRNA	4.59465	7.63211	8.01262	6.01174	2.0586	3.17839	1.0293	8.72406	12.8499	19.9636	14.4102	10.9301	12.8947	25.3694	22.2487	42.2014	14.7476	4.11721	4.22296	12.2	39.2862	28.3532	19.6291	17.9594	5.15519	18.8365	5.3032	16.3535	3.64163	1.86458	3.03118e-06	0.000144483
ENSG00000237931.1_2	CLIC4P3	chrX	40936252	40937003	+	pseudogene	715.234	603.891	642.79	697.362	735.951	583.764	576.409	954.194	437.968	290.581	295.41	251.392	333.278	306.385	477.818	248.062	297.221	371.578	562.709	268.399	645.416	598.689	310.795	318.779	688.699	375.905	670.076	314.787	0.545812	-0.873524	3.0407e-06	0.000144812
ENSG00000236609.3_3	ZNF853	chr7	6655248	6663921	+	protein_coding_gene	272.616	291.928	449.597	232.454	288.205	247.914	342.758	357.687	142.42	119.781	115.282	90.7199	153.744	215.64	39.2001	153.366	113.443	262.472	252.322	127.545	113.369	183.205	128.68	102.144	310.395	144.583	290.066	128.112	0.465976	-1.10167	3.11119e-06	0.000147943
ENSG00000174460.3_3	ZCCHC12	chrX	117957753	117960931	+	protein_coding_gene	16.0813	7.63211	17.8058	7.0137	27.7912	14.8325	24.7033	8.72406	8.56661	6.65453	4.11721	4.37204	7.9352	5.85449	2.11893	3.08791	4.53773	7.20512	4.22296	2.21818	4.48985	11.9956	7.63355	1.12246	15.573	5.38327	15.4569	4.51379	0.346369	-1.52962	3.11179e-06	0.000147943
ENSG00000264860.1_4	AC097641.1	chr17	71161116	71192732	+	lncRNA	462.528	273.802	207.438	303.593	475.538	219.309	263.501	183.205	139.207	138.636	160.571	90.7199	182.51	178.562	98.5301	96.7544	113.443	85.4321	256.545	83.1816	130.206	158.124	215.921	61.7354	298.614	136.88	268.652	134.421	0.458346	-1.12549	3.12296e-06	0.00014824
ENSG00000108244.16_3	KRT23	chr17	39078948	39093886	-	protein_coding_gene	2226.87	2397.44	899.194	343.671	1047.83	383.526	511.563	455.832	182.04	469.144	33.967	281.997	391.8	376.639	14.8325	123.516	102.099	343.787	259.712	114.236	108.879	66.521	11.9956	22.4492	1033.24	181.476	705.378	118.876	0.175646	-2.50926	3.12337e-06	0.00014824
ENSG00000125458.6_3	NT5C	chr17	73126320	73127890	-	protein_coding_gene	434.195	478.915	638.339	574.121	305.703	521.256	484.801	479.823	220.59	201.854	139.985	151.928	176.558	282.967	404.715	286.146	225.752	314.966	289.273	253.981	194.186	431.841	303.161	332.249	489.644	263.135	482.312	268.474	0.537371	-0.896011	3.1561e-06	0.000149665
ENSG00000222849.1	RNA5SP21	chr1	78245589	78245684	+	rRNA	19.1444	34.3445	44.5145	23.045	12.3516	21.1893	18.5274	19.6291	56.7538	38.8181	57.6409	76.5107	39.676	76.1083	73.103	41.1721	40.8396	47.3479	64.4001	17.7454	59.4905	58.8874	38.1678	97.6542	24.0932	55.2697	20.4092	57.1974	2.28693	1.19341	3.16626e-06	0.000150019
ENSG00000144031.11_4	ANKRD53	chr2	71205510	71212629	+	protein_coding_gene	35.2257	24.8044	32.0505	21.0411	33.967	23.3082	10.293	22.9007	17.1332	7.76361	13.3809	12.0231	16.8623	6.83023	3.17839	5.14651	7.94103	20.586	8.44591	6.65453	10.1022	3.27152	2.18102	3.36739	25.4488	9.05424	24.0563	7.85232	0.355989	-1.49009	3.18807e-06	0.000150923
ENSG00000135960.9_3	EDAR	chr2	109510927	109605828	-	protein_coding_gene	136.308	118.298	1152.04	81.1585	165.718	489.472	129.692	138.494	128.499	35.4908	84.4028	75.4177	187.469	46.8359	21.1893	20.586	11.3443	50.4358	25.3377	66.5453	25.8166	8.72406	9.81457	3.36739	301.397	50.0798	137.401	30.6537	0.16623	-2.58875	3.20073e-06	0.000151393
ENSG00000169213.6_3	RAB3B	chr1	52373628	52456436	-	protein_coding_gene	6115.48	21784.9	11588.9	14319	10309.5	12614	8249.86	6905.09	15849.3	20294.1	38052.3	20399.9	32746.6	39942.2	44494.3	28809.1	16953	21507.3	31921.3	16496.6	19388.3	22140.6	11832	29496.1	11485.8	25645.2	10949.2	21823.9	2.23278	1.15884	3.24172e-06	0.000153201
ENSG00000168679.17_3	SLC16A4	chr1	110905470	110933704	-	protein_coding_gene	467.889	438.846	556.432	386.755	492.006	398.358	461.127	570.336	289.123	255.09	174.981	245.927	348.157	276.137	123.957	161.6	238.231	324.23	217.482	358.235	413.066	258.45	125.408	168.369	471.469	248.653	464.508	250.509	0.52739	-0.923058	3.25033e-06	0.000153477
ENSG00000154358.20_3	OBSCN	chr1	228395831	228566575	+	protein_coding_gene	1386.05	1358.52	1860.71	640.251	1288.69	1129.39	1325.74	796.071	361.939	463.599	662.871	396.763	996.859	689.854	221.428	222.329	324.448	844.028	726.348	536.798	245.819	229.007	449.289	180.716	1223.18	472.006	1307.21	423.026	0.38592	-1.37363	3.25336e-06	0.00015349
ENSG00000091592.15_3	NLRP1	chr17	5402747	5522744	-	protein_coding_gene	1437.36	662.086	933.915	988.932	1740.55	775.527	809.032	596.508	398.347	451.399	285.117	394.577	769.714	622.527	146.206	498.182	368.691	769.918	404.348	332.726	490.516	234.459	324.971	185.206	992.989	417.307	871.473	396.462	0.420282	-1.25057	3.28982e-06	0.000154958
ENSG00000111344.11_3	RASAL1	chr12	113536624	113574044	-	protein_coding_gene	192.975	26.7124	19.5864	24.047	31.9084	21.1893	38.0842	123.227	18.204	23.2908	9.26372	14.2091	13.8866	40.0057	8.4757	14.4102	6.8066	17.4981	13.7246	7.76361	26.9391	18.5386	14.1766	5.61231	59.7163	15.8003	29.3104	14.1929	0.264401	-1.9192	3.29007e-06	0.000154958
ENSG00000100628.11_3	ASB2	chr14	94400499	94443137	-	protein_coding_gene	1113.44	641.097	1033.63	586.145	1673.65	724.673	895.493	364.23	391.922	340.49	315.996	196.742	662.589	232.228	67.8056	180.128	181.509	514.651	476.138	216.272	369.29	230.097	89.4216	77.4499	879.043	283.921	810.083	231.163	0.323014	-1.63033	3.3239e-06	0.000156418
ENSG00000162851.7_3	TFB2M	chr1	246703862	246729626	-	protein_coding_gene	738.973	1036.06	1036.3	1096.14	654.636	980.003	870.79	966.19	1399.57	1162.32	1559.39	1438.4	1119.85	1452.89	1234.27	1409.11	1263.76	1007.69	1300.67	1309.83	1294.2	1647.76	1013.08	1531.04	922.386	1321.49	973.097	1305.25	1.43283	0.51887	3.35617e-06	0.000157803
ENSG00000273002.1_3	AL355388.2	chr1	155948590	155952777	+	as_lncRNA	26.8021	12.4022	15.1349	20.0391	14.4102	20.1298	20.586	13.0861	5.35413	7.76361	6.17581	5.46505	17.8542	13.6605	8.4757	6.17581	5.67217	8.23442	5.2787	9.98179	6.73477	5.45254	2.18102	3.36739	17.8238	7.36422	17.587	6.17581	0.414577	-1.27029	3.38361e-06	0.000158823
ENSG00000251533.2_2	LINC00605	chr14	103653558	103655365	-	lncRNA	6.89198	7.63211	12.4641	4.00783	4.11721	6.35678	6.17581	6.54305	2.14165	2.21818	3.08791	1.09301	0.9919	1.9515	1.05946	1.0293	2.26887	2.0586	3.16722	4.43635	3.36739	1.09051	1.09051	1.12246	6.7736	2.01093	6.44991	2.00505	0.292932	-1.77136	3.38335e-06	0.000158823
ENSG00000153982.10_3	GDPD1	chr17	57297828	57353328	+	protein_coding_gene	293.292	429.306	1297.15	549.072	186.304	697.127	631.992	596.508	1432.77	1308.72	1154.88	1318.17	1182.34	1924.17	805.192	1180.61	2598.99	712.277	1021.96	1689.14	1307.67	1185.38	1273.71	1642.16	585.094	1358.63	572.79	1290.69	2.322	1.21537	3.39989e-06	0.000159453
ENSG00000010310.8_3	GIPR	chr19	46171502	46186982	+	protein_coding_gene	99.5508	77.2751	87.2485	36.0705	82.3442	76.2813	73.0805	61.0684	26.7707	14.4181	18.5274	31.6973	30.7489	74.1568	22.2487	22.6446	9.07546	38.0842	20.059	26.6181	7.85723	6.54305	42.5298	6.73477	74.1149	24.9196	76.7782	22.4467	0.336895	-1.56963	3.41735e-06	0.000160136
ENSG00000241790.2_2	ENO1P4	chr2	202486369	202488153	-	pseudogene	311.67	475.099	563.554	604.18	401.428	399.418	393.193	223.554	232.369	171.909	228.505	279.811	244.999	289.797	167.395	163.659	150.88	312.908	191.089	316.09	134.695	220.283	78.5166	181.839	421.512	210.296	400.423	205.686	0.498989	-1.00292	3.43678e-06	0.00016087
ENSG00000168309.16_3	FAM107A	chr3	58549844	58613337	-	protein_coding_gene	1389.88	660.178	465.622	773.511	1426.61	436.499	911.962	910.574	524.705	439.199	321.142	350.856	270.789	190.271	153.622	121.458	85.0825	429.219	813.975	234.018	126.838	208.287	141.766	248.064	871.855	291.206	842.042	241.041	0.334009	-1.58204	3.43882e-06	0.00016087
ENSG00000239112.1	SNORD123	chr5	9548948	9549017	+	snoRNA	5.36043	19.0803	25.8184	8.01566	15.4395	22.2487	17.4981	11.9956	6.42496	1.10909	1.0293	6.55806	5.9514	3.90299	3.17839	2.0586	9.07546	12.3516	9.50165	4.43635	4.48985	1.09051	3.27152	2.24492	15.6821	4.79217	16.4688	4.16967	0.306654	-1.70532	3.44381e-06	0.000160968
ENSG00000251573.2_2	LINC02106	chr5	50265051	50266001	-	lncRNA	9.1893	7.63211	16.0252	19.0372	11.3223	10.5946	15.4395	3.27152	4.28331	5.54544	6.17581	3.27903	2.9757	3.90299	2.11893	5.14651	3.4033	3.08791	3.16722	4.43635	7.85723	7.63355	1.09051	1.12246	11.564	4.07664	10.9585	3.65314	0.351572	-1.50811	3.47281e-06	0.000162186
ENSG00000206432.4_3	TMEM200C	chr18	5882071	5895954	-	protein_coding_gene	84.2353	61.0569	45.4048	101.198	155.425	24.3677	30.8791	17.4481	24.629	12.2	44.26	36.0693	20.8299	8.78173	2.11893	12.3516	6.8066	31.9084	13.7246	8.8727	7.85723	6.54305	19.6291	7.85723	65.0018	16.5275	53.2309	12.2758	0.254454	-1.97452	3.47672e-06	0.000162233
ENSG00000164124.10_3	TMEM144	chr4	159122756	159176563	+	protein_coding_gene	725.189	1061.82	1920.36	1620.16	1596.45	1657	1453.37	933.475	2895.51	2183.79	4950.94	4404.83	5299.72	2355.45	3069.26	5640.58	3911.53	2683.39	2584.45	3722.1	1680.33	3256.26	708.83	2571.56	1370.98	3244.91	1524.91	2982.39	2.36696	1.24304	3.50819e-06	0.000163563
[truncated: 4,475 more rows]

## Sheet: pvalue<0.01
id	gene_name	chromosome	start	end	strand	gene_type	normal_1	normal_2	normal_3	normal_4	normal_5	normal_6	normal_7	normal_8	tumoral_1	tumoral_2	tumoral_3	tumoral_4	tumoral_5	tumoral_6	tumoral_7	tumoral_8	tumoral_9	tumoral_10	tumoral_11	tumoral_12	tumoral_13	tumoral_14	tumoral_15	tumoral_16	Mean_normal	Mean_tumoral	Median_normal	Median_tumoral	FoldChange	log2FoldChange	pvalue	padj
[truncated: 3,343 more rows]

[truncated: 6 more sheets: FC>2, ncRNA, pseudogenes, others, PCG, summary]
