# Supplementary material for: Reference-free transcriptome exploration reveals novel RNAs for prostate cancer diagnosis
Source: Life Sci Alliance. 2019 Nov 15;2(6):e201900449. doi: 10.26508/lsa.201900449 (PMC6858606; doi:10.26508/lsa.201900449)
Supplement: Supplementary file 5 [file LSA-2019-00449_TableS5.xlsx]

## Sheet: Contigs_ref.genes
Table S5. Genomic coordinates, sequence features of DE-kupl contigs, PCA3 and housekeeping protein-coding genes, as well as targeted sequences (probes) for RNA expression measurements by the NanoString nCounter assay.
		RNA-seq counts		DE-kupl
probe_ID	contig_ID	log2FC (RNA-seq)	wilcoxon_pvalue (RNA-seq)	log2FC (DE-kupl)	p-value (DE-kupl)	HUGO_ID_gene/other	HUGO_ID_paired_gene	Type of k-mer	probe target sequence_Nanostring	strand	chr	probe_start	probe_stop	contig_sequence	contig_start	contig_stop
P1	ctg_17297	4.67694	1.36e-06	3.89905	3.86484e-13		none	contiguous	TGAATTTGCAGTCCATAGGTCAGCAGATTTCTCTGACTTTCCTTATTTTCTTTGCTTAGCCACAGAAAAACAGAAAAATCAGTGAGTTTACATGCACAGA	-	chr7	38351791	38351890	GATTGAATCACGTGCTATACTTTACTGTAGTCCCGTTCTCTTTATATTTTACTTATAAACTAAAGTTACAGAGTAATTATCAAAACTCCATATTTGTGTTCTGAAATTGGCAGAATTTGAATTTGCAGTCCATAGGTCAGCAGATTTCTCTGACTTTCCTTATTTTCTTTGCTTAGCCACAGAAAAACAGAAAAATCAGTGAGTTTACATGCACAGAATTAAATGTACAGACTATTCTCTGAAAGAGCTCAGTTCTATGTGAAAATGAATAATGTAATAAATATTCTTATGAGTGTAGTAATAGTAGCTATTGTTTATTGAGTACTTCTTATGTGCATGGCACTTTATACTGCATGCTTTATGTCATTTGAGCCTAACAAAATACTATCATTATTATTA…	38351573	38352007
P2	ctg_28650	Inf	3.723e-05	4.45717	6.79938e-12		FBP2	contiguous	ACCAGATCCTGGTCACAAGAAACAACAGCTCCCATTTGTAAATGAATGCCTTGACATTGAGCTTTACCCACAATGGAGAGTTGGTTAACAGGAGGTGGTC	+	chr9	97331969	97332068	TTTTATTAACCTGGAAAATGTGTTCCTTTGTTCTGATTGTGTGGTCACCAACAACGGCTGATTTTTAATATGGGCTCTCATACACCCTGTTACCGATTATCAGACACCAGATCCTGGTCACAAGAAACAACAGCTCCCATTTGTAAATGAATGCCTTGACATTGAGCTTTACCCACAATGGAGAGTTGGTTAACAGGAGGTGGTCTCTCTGTGCCTGAACAATATGTGTGTTCTGACAAAATCAAATCACCAGCCCTGCAATCCCACAGACCTCACAGGCTCAGTTTGACCCACCAGGGAATGCTGCCTCCATAAGCTACTGGCCGCCTTCCATGGCATTTCTATCTGTGACAACTGCCACAAGCTACCTCCGCTGGATGTCAAACAGGCACTAAGCTT…	97331864	97332290
P3	ctg_57223	Inf	3.723e-05	3.87048	2.22582e-08		none	contiguous	GCTCTCTCTTCCTCCTTCTCCAGGCATGTAAGAAGTGCCTGCCTCCCCTTCACCTTCCACCATGATTCCTAAGGCGTCTCCAGTCATGCTTCCTGTACAA	-	chr20	56336846	56336945	GGGCAGATTTCCCCCTTGCTGTTCTCATGATAGTGAGCTCTCATGTGATCTTCTTGTTTAAAAGTGTGTGGGACCTCCCCCTGCTCTCTCTTCCTCCTTCTCCAGGCATGTAAGAAGTGCCTGCCTCCCCTTCACCTTCCACCATGATTCCTAAGGCGTCTCCAGTCATGCTTCCTGTACAACCTGCAGAACTGAGTCAATTAAACTTCTTTTTTTAAAATAAATTACCCAGTCTTGGGTAGTTCTTTATAGCAATGCAAGAACGGACTAATACACCCACCTCTACAAAAGAAAAAA	56336731	56337027
P4	ctg_63866	6.65954	4.129e-05	4.02641	1.14609e-09		PDLIM5	contiguous	TAGAAAACTTCAGACAGAAAGAGCAGAAACTTTGTCCTTTGAAACACAGATGCATAAGAGACCGTGTCAATCAACTCAAGGACCTGGCATAGAAGTCATT	-	chr4	95591224	95591323	TGAAGGTATTATAGTCTACTAAAATACTTTAAAACAAAGAAACAATGGTATTTTTGAGTAAGTTAGAATAGCACCAGTTGTGTGTGCTTTACAAACAAAAGAAACAAGGAAAAAAGAGGAAAAAGGAAAAAAAATCATTATATTTGAACTAGAGAGCAAACATGACAGTTTAGAATATGAAGATGAAAAATAATTTGGAACCCAATTAGAAAACTTCAGACAGAAAGAGCAGAAACTTTGTCCTTTGAAACACAGATGCATAAGAGACCGTGTCAATCAACTCAAGGACCTGGCATAGAAGTCATTTTCCTTGGGAACTGTATTTACCATATTTGAGAAATTGAAAAATTATACTCCCTGAGAATTCTAAATTGCTTTATTTATCTCCCCAAGGTCAGA…	95591040	95591529
P5	ctg_123090	4.54384	4.455e-05	3.32835	2.95611e-08	AC004066.3	none	contiguous	GGGTTGGCCATGTAACCCCGGTCCTGGCAAATAGGACCTTTATAATAGTCTGAAAGAATAAGGGGTGGATTATTGATCCTGGGAAAGCTTTTGGTTCTCC	-	chr4	106470806	106470905	GAACAATCTTCTATTCAATCAGGGAATCAGGCAGACACTGTTGGTTGCTTACTTGGTCTTCATTTTTACCGCCTCCTACCCCCATGCTATTCTTTGCCAACAGAACCCTTCTCTTGTTCAAGGCAGCATTAGTCTTAGCCAATCAACGATAATCTTTTTTCCTATTTTTTTTCTATCTCCCTTTCTCTTAGGGTTGGCCATGTAACCCCGGTCCTGGCAAATAGGACCTTTATAATAGTCTGAAAGAATAAGGGGTGGATTATTGATCCTGGGAAAGCTTTTGGTTCTCCAATAAAAGGGGC	106470794	106471095
P6	ctg_111158	3.79287	4.972e-05	3.21302	3.25908e-10	PCAT7	FBP2	contiguous	TTTAGGTTTCCGTGTGTTTCTATTGAGCTGCTCAGTGCCCGGCTTAGAAGACCAGGAAAAGGAGTCACAGGTCGTATGCTGGAGGCTTGAGCCGCGGCAC	+	chr9	97317430	97317529	AGCAGAGTTACGTTTTTTTTGTTGTTGTTTTTTTTGTTGTTGTTTTTTTAGGTTTCCGTGTGTTTCTATTGAGCTGCTCAGTGCCCGGCTTAGAAGACCAGGAAAAGGAGTCACAGGTCGTATGCTGGAGGCTTGAGCCGCGGCACCGTGGCGCGGCTCGCCTCGCTGCGGTTGGTGGTGGCGGTGGACATTGCAGCGCGGCTGGAGGGGTAGGAAGAAGAAGATAGTTTTGGGATAGATAGAGG	97317384	97317628
P7	ctg_117356	6.84735	5.336e-05	4.35372	9.73e-12		snoU13	unmapped	TAGTTGCCAATGCAAGACCCATTTCCTCACGTCCTAACTAATAGAACCCCAACTGTGTCCAGGCAGGTGACGTGCCCAGCTAAAAATACTCACCTTTTCA	+	chr21	42954283	42954382	AAAAGTGGGAGAGCTTAGTGATAAGACTGTATCATTTTTGCAAGACACAAAGCAAGCACAGCTGGATGGCATGTGCCAGCTCCCTCACCATGCTGAGCACTTTTACTCACATCTCACCCCTGCAGACAGATGCCAGTGTCCTCACTCACCCACTGGGGCAGACATTATTAGTTGCCAATGCAAGACCCATTTCCTCACGTCCTAACTAATAGAACCCCAACTGTGTCCAGGCAGGTGACGTGCCCAGCTAAAAATACTCACCTTTTCAGACTCCCTTGAAGTTAGTAGCGGCCACGTGATACTTCCAACAAATAAGACATACACAGAGATCTGCTGGGGCTTCTGTGAAAACTTTTACTTCCCTGAAACGGGTACCACCTTCCTTCTCCCATTCTTTCT…	42954115	42954690
P8	ctg_73782	4.51286	5.744e-05	3.31801	8.56773e-08	LINC01006	none	contiguous	GAAAGGAAGGCTCATGAACCGACTGAGACATGGTTGAGCGGCTAAGATTTCTGTAGCTATGATGCTGCCATCCAGGCCGACTTCAGACTTGGGAAGTTTC	-	chr7	156395748	156395847	GTTTCTTTGGGTCAAAGGGAGCTCTCATTGCTACTTCAGTGTTTGCAGTGTGCAGAGTTGTAAAAGTTGAGACTAGCCACTCAAAATGCGAGCTTCTGGTCCTGACATTTCACGGGGAAAGGAAGGCTCATGAACCGACTGAGACATGGTTGAGCGGCTAAGATTTCTGTAGCTATGATGCTGCCATCCAGGCCGACTTCAGACTTGGGAAGTTTCCATGTGAGTTTTTGGAAGGTTTTGGGGTTTTGTTTTTGATGGAGGAAAAGAATGTGAAAGAGTGTTTGCACCAAATAGATTAAGCTGTTAGTAAACATGCACCCTTTAAATTAACTGATGATAAGGACAAAGAAGGTGCTTTGTCGTCGTCAACTGGATTTGTCTGAGGTCACAGAGACAAAC…	156395508	156395963
P9	ctg_9446	4.05223	7.38e-05	3.07085	1.3719e-07		none	contiguous	GCTGAAATGTGTGTGTTTCCTGGCATAGCCTAAGAAGAAAATGTATCTACACTCTCATTTTGTAGAACTCTGAGAGGACCATCCAGTCATTGCTGACAAA	+	chr4	123626775	123626874	TTTCTAAAGCTAACTGATAAAATCATTTATCTAGTTCAGTGAATAAGTGTGGTAGAAGTTAAAACAGAAAAAAATGCTATTATTTCTAAAATAATTTCCCCTTGGACTGCATTTGCTAAATTAGCAAGTGATTAAATTAATCCTAGTTTGTATTATTTGCTGAAATGTGTGTGTTTCCTGGCATAGCCTAAGAAGAAAATGTATCTACACTCTCATTTTGTAGAACTCTGAGAGGACCATCCAGTCATTGCTGACAAAGCCCAGTCCTACATATCATCATAGTACATGAGGGGCATGTACAGTTAATGTGAAAAATAAGCTCAATTGTCCTGATATGTTGCAGTCCAAAACTTCATTTATGAGTCATTTATTTAGAACTCAGAACACTCTTGCC	123626617	123627010
P10	ctg_25348	Inf	9.108e-05	4.32535	6.66089e-11	CTBP1-AS	CTBP1	contiguous	GGCCAGCGGGCCTGCTCACCTATAGGCAGCCCCATTGAGCTCAGGGTGCACGACGGCGGGGTCCATGCTGGCCCAGTGGGTGGCGGCTGTCAGATGGTCC	+	chr4	1206682	1206781	CGGATGTTCCTGCCTATGGCAGCTACTTCTCAGGGCTGGGGAGGGGAGCCCTGGTGTCTCCAGGTGACTTGAACATGAGGTCTTCGCCTCACCCAAAGCCCCCTCCTCCCACAGGCCCCGTGCCCATGGCACTCCTGTGTCCACTGAGCCCTGAAGGCCACCCCAGCCCAGGCTCCTTCCAAGAGGCCCTGGTTCTCATGGGCCTTTCAGGTGAGGTTGGCCTTACCAATTCTACCCAGATCCTCCAGGTCAGTCAGTGGAGACGCCGCCCCTCCCACCAGGGGCTGTGCTGGGATCCAGGGGAAGCCTGGGGCCCTCCTGGAGGCTGTTCTGGGCCAGCGGGCCTGCTCACCTATAGGCAGCCCCATTGAGCTCAGGGTGCACGACGGCGGGGTCCAT…	1206349	1207596
P11	ctg_104447	Inf	9.108e-05	4.67509	5.55294e-13	RP11-627G23.1/LOC283177	none	contiguous	CACACCTTGCACAGAGCTCAGGCAGCATTCTAGCACCATCAGACAAATTCTTCATGAGTCAGAAATCGCACCTGTCTCTTAATAGCGATCTGGCCTCAGG	+	chr11	134341218	134341317	GGACTAAAACAGTGACAGTGAGTGCAACTCTACCTATCATGTTCATATTCTAGGTAGAAACTGGGGAAAAGAGAAAAGGCGGGAAAAAGGCGTTTCTCTACAAAGATCACACATAATCTTCTGTCTGCATCTCATTGGTCGGCATTTAGTCACATGGCCATAACTACCAGCAAGGGAAGCTGGGAAATGTAGTTTTTCAATGGCACATTGCTACCCTTAATAAAATAAGGATATGCTACCAACAAAGAATGAATATGGGAAAGGCCCCTAGCAATGTCTGCTGCATCTGCCACTGTGGTTTTCTCTGATTTCCACAGACATTGCTCTTCCACATAGAGCGCATTCTGATTCCCAAGCCACCACTCCCAAATCACACCCAGTTTCTGCATCTAGCTTGTG…	134339602	134343047
P12	ctg_2815	4.8844	0.0001435	3.4577	7.45565e-09		none	contiguous	TCTTTGATAAAGCAAACAAAACAAAGTGGGGAAAGGATACCCTATTCAACATATGGTCCTGGGATAATTGGCAAGCCACATGCAGAAAAATGAAACGGTT	-	chr9	97310978	97311077	CAGAAATAGAAAAATTAGTCCTAAAATCTGTATGGAACCGCAAAAGATGCTGAAAAACCAAAGCAATCTTGAGCAAAAAGAACAAACCTGGAGGCATCAGACTACCTGATCTTTGATAAAGCAAACAAAACAAAGTGGGGAAAGGATACCCTATTCAACATATGGTCCTGGGATAATTGGCAAGCCACATGCAGAAAAATGAAACGGTTCTTCAAAAGGTTAAATATAGAATTACCACGTGACTCAGTAAATTCACTCCTATGTATACCTCAAAAAGAAATTAAAACAAGGTGCCTACACAAAAAGTAGCATACAGGTATTTATAGCAACAAAAAGTAGGAAACAACAGAAATGTCCATCATTAATGAAATGTGGCCTGTCCATAAAATATTGACAATG…	97310763	97311186
P13	ctg_37852	3.86165	0.0001849	2.94948	2.84984e-06		ABCC4	contiguous	CACCACAACATCTCAGCATTGTCGGTCCTTAAATGCCAAGGTTTGTGCTCACCATTTCCATCCTTAAGATTCTCACAGGGAAGAACCCACACAACAGCTT	+	chr13	95932198	95932297	AAAAAAACGTGATCTAATAGACAATCCAGATATAAAGAACACAAACCCTTTTCCCTACAATTTAACCAAATGCTAAAATGCACCAGGAAACACAGGATACTACAGAGATAAAGATTTGGCCAGCAGATTATCAACCCCAGGAAAAGAAATCCATTTCTGTAGCATGCTATGCTGTTGGAGGCACACGTCACACTTCTTAATTCAAGGACAGAAAAGCACAAACTAAAATGCACACTGGAGTATGACTCCCCCTTCTCTATCTGCTAAAGCGCTTCGCATGTGACTTTCAATCTCTAAGCTGGGAATCAATCAGGCAGCCCAGCCTCCTATATTTTCTAGTTGTATTGCTTTGAGCATCAAATTTAACCTCTGTGCACCTCAATTTCTTCAGCTGGAGAC…	95931257	95932545
PCA3	-	6.41856	0.0002087	-	-	PCA3	PRUNE2	-	ACCAGTGTCATGAGTTGAATTCTCCTATTATGGATGCTAGCTTCTGGCCATCTCTGGCTCTCCTCTTGACACATATTAGCTTCTAGCCTTTGCTTCCACG	+	chr9	79401376	79401475	-	-	-
P14	ctg_61528	Inf	0.0002097	3.82478	2.90968e-08		TPO	contiguous	AGGAGGTCACTGTCGACTTCGAGCAAAGGAGATTCCTGAACCAAAACTGAGCCTAGAAGCCATCAACACATAAGTAGACCTGGCCTTATAAAATATGAAA	-	chr2	1476891	1476990	AGGAGGTCACTGTCGACTTCGAGCAAAGGAGATTCCTGAACCAAAACTGAGCCTAGAAGCCATCAACACATAAGTAGACCTGGCCTTATAAAATATGAAAGTGCTTCATGCTGACAGTTCTGTATTGATGGGGCTGTAGAAAAACATTTGTAAGAAAAGTGAGAGATAGAGAGTTAACATCTAGAGTGGAAAGGAGCAATTAAAATCAATTAACAGTCAAATAGTAGAAAAATGGACAAAGGCTATGAACAGATCATTCGTTGAACAAATACAAATTGCCAAAAAAAGATAAATAAAGGACAACTTTAAAATTCACTAATATTCAGGGAAAGCAACTAATGTAACA	1476645	1476990
P15	ctg_512	Inf	0.0002097	4.07097	3.18e-09		PXDN	spliced	TTCCACCAGAACGAACGATGATCACTCAGAATCCCCAGAGTCAAGTCTGCCTTATTTTCCGAGTAACAACACCACTGGCTTTTCTCTGGAAGCACGGGGC	+	chr2	1639602	1639701	ACTGGCGGCAGCTGACCACACGCCCCAATGGAAGACATTCCCACCACCGTGCTGTCAAATAAAAACCGTAGTCACAAAGGCGACGTTCTCAGAGGACTGTGGGAGCAAGATTCAACCAGATGACGAGAACGTCCTGCACCTACACTTCCACCAGAACGAACGATGATCACTCAGAATCCCCAGAGTCAAGTCTGCCTTATTTTCCGAGTAACAACACCACTGGCTTTTCTCTGGAAGCACGGGGCCCCATAACAAGGTGACCTTTCCAACCGCTGTGCCATGCACAGGGGTAGCAGAAGCCTCCTGGAAGGGTCTCCTTCCTCAAACCCTCTCTTGCATCTTGCAGGGCCGGGGGGCAGACAGGGTGACAGTGGCCGG	1639457	1639834
P16	ctg_111348	Inf	0.0002097	4.34031	1.71021e-10		DLX1	contiguous	ATACAGCGCCTGCATAACACCGAGCCAGCAATTCCAATATCAACATCAATAAAAAGAATCGAAAACCTAGGAAGGAGTGGAGGAAATTTATTTGCAACGC	-	chr2	172952305	172952404	GCAGAATGAGGACAGCGGACGGATGAGGACCTGGACTTTACCAGCGCACAGACAGAGCAAAAGGAGACAGGAGACTGACAGGACAGAAAAGAGCTTTTGCTTTTTCTACATTTTGTTTTTGTTTTGTTTTTTCCTGATAGTCCCACAAAGCTGAAGGTCGGCGGGTCGGGTGGAGCGGGTTTATCTTGCTGCTTGGGCTGTCTCAGGTGGCAGTGGCTTCCCTCCGAGGCCACTCTCTGCTGCCACTGCTCGGCCCAGGCCAGGGTTCAGGCTAGAGCGCGGATGCCGGGAAGTTGCTGGGCCGGACCTCGCGGGGCTCCGAGGAGATGGAGGGCGTCCCGCCTCCACTGTTCCTTCTTCCCTCTGGGTCCTTCTTTTCCGGACGGGATGGATGGACCT…	172951069	172953437
P17	ctg_36195	Inf	0.0002097	4.06805	3.2144e-09		none	repeat	TTTGGAGTAATATCTGAGTAAATACACTTATATGTAAGAGAATCAAAGGAACAAGATATTATTTTATATCCAAGGAAATTAACACTTAGAACATAAATAC	-	chr5	69138119	69138218	ATGTGAAATAAGGTGATAATACATTCCAAAGTATATATTTTTTCAACTTTGAATATATCTGGTGTATTTGGAGTAATATCTGAGTAAATACACTTATATGTAAGAGAATCAAAGGAACAAGATATTATTTTATATCCAAGGAAATTAACACTTAGAACATAAATACGTATTGCATTACTTCATATTAAAGAAATGTTTTACAAAAGAAAATAAAGGAGCTTATTTTATAGCCCCATTTCCACAAATAATAGCAAAGGTACATACACATATCTAATGTTTTACACACTCATTATTGTTTCTCTTAAAATTTGTTGCTTATACTATTTTAAAAGG	69137952	69138284
P18	ctg_105149	3.32096	0.0002142	2.73585	3.86488e-07	PCAT1	none	contiguous	GCTGCTCTCTGAATCCTGGCAAAACCATTACATCTGAGAAGTATGCTCAACAAATCAATGAGCTACGCCAAAAACTGCAGCATCTGCAGCTGGCATTGGT	+	chr8	128032818	128032917	ATGGCAACCAGCAATGACCAGCTCAGTGGCTGGACTGAGAAGAAGCTCCAAAGCACTTCCCAAAGCCAAACTTGCACCAAAAAAAAGGTCAGGGTCACTGTTTGGTGGTCTGCTGCTGGTCTGATCCACCGCTGCTCTCTGAATCCTGGCAAAACCATTACATCTGAGAAGTATGCTCAACAAATCAATGAGCTACGCCAAAAACTGCAGCATCTGCAGCTGGCATTGGTCAACATAACGGGTCCAATTCTTCTCCACGACAACGCTCAACTGCACCTTGCGCAAGCAGCGCTTCAAAAGTTGAACAAATTGGGCTACATAGTTTTTCCTCATCCGCCATATTCACCTGACGTCTTGCCAACTAACTACCACTTCTTCAAGTATCTCAACAACTTTTTG…	128032688	128033213
P19	ctg_61472	5.50927	0.0002745	3.85456	1.15028e-09		AP006748.1	contiguous	CAAACCTTGTGAAGATGAGCGTTGGGAAAGGAGTAGGAAGGTCCCAATTTGGAATTTTGACATCCTAAAAGCCTTGGGTGCCGCAGAATGAGTAAGCTGG	+	chr21	42952408	42952507	CAAACCTTGTGAAGATGAGCGTTGGGAAAGGAGTAGGAAGGTCCCAATTTGGAATTTTGACATCCTAAAAGCCTTGGGTGCCGCAGAATGAGTAAGCTGGAGGGTACTGTGTAAAGACCTCGGCTACTGCAGCAGAGAAACAGATCAAAAAAGTCAAGACCGGCGAGAGGAAAGTGATTGAAAGGCCATCACTGAAAGAG	42952408	42952607
P20	ctg_44030	6.57008	0.000304	4.12377	2.91966e-10		none	contguous	ATCGCCAGGATTCTCAGCTGTCGAGAATGTCACCCGCTGCTGTACTCCCAACAGCAAGGGAGGCACCTGGCACGTCGTGAGCAACTCTCGTGTATTTGTT	-	chr2	1623926	1624025	GGGAACTACAATTCAAGATTTGGGTGGGGACACAGCCAAACCGTATCAGAGCTGTGCTCCCAAGCACCCAAGGACTGCCGAGTTCTCAGGCTGGCAGCTCCAGCTGATGGCACGTCACTGGGGGGTGAGGGGTTGAGGACCTGAGCTGCCCCCAGGCTCTGCAATGGAAAGCATCAGGCTGGACTTGGACATTCTGGGTGGGAAGTGTCTGGAACCTGGACGCTGGCTTGGAGAGGAGCCTCAGGAGGAATCGCCAGGATTCTCAGCTGTCGAGAATGTCACCCGCTGCTGTACTCCCAACAGCAAGGGAGGCACCTGGCACGTCGTGAGCAACTCTCGTGTATTTGTTGCATGATCTAGTCCAAGAATGGCCAATGAGTTTCACCTGCCAGTTTTCAC…	1623603	1624259
P21	ctg_23999	4.70196	0.0003206	3.40314	8.79959e-08		FBXL7	contiguous	GAGGTGGGATGAATGATCTCTATCCCTGTCATTTGGTTAGGGTTTACTGACAATGCCTGCGGCAGTGCCATGGGAGTATAAATTGGTAAGATGTTATGGA	-	chr5	15857080	15858276	TCTCTAATAGTTGTAAGGATAAAATTTGCAATAATTCTTTTACAGTGTTACAGAATTCTAATGTGAATAAGAAAAAAAGGAATAAGACTGGAATACCAAGCCATGAACTTGGAAAGAAATCCAAACTGGCATACTGGTGAATACTACATTTTCTTGAACCAATGTGCCAACTTGGAACAATTCTTTAACTTACCTGTTTCTATTTCCTCAACTTATATCTATCGGTCCTCAAAATAGAGACATGACAAACATACACATTCAATAATTATACACATATACACATATACCAGATGCTGTAGCATTTACAATGAAGTCACCCTTTGCAAATCATTTTCACATATGTCTGCTAGTAGTTAAAAAGATACCTAACTTTATTGGAGGAAAAAATAAATCATCTAT…	15857080	15858276
P22	ctg_119680	2.9639	0.0003295	2.37589	1.46135e-05		none	contiguous	AAATTAAGAGATGGGATCTTGCTACGTTGCCCAGGCTGTAGTGCTGTGGCTATTCACAGGCATGGTCATAGCTCACTACTGTCTTGAACTCCTGGGCTCA	-	chr9	110206222	110206321	AGAGCTCACTGCAAGACAGATGAGAAAGAGGTTGTTTTAAGATGAAGAAAAGGAATGATACTTGATTCATCATCTTATACATGATTCACAAGAAAAATATAATGTCTTTATTTTTCAGAGGGTTTTTTAAAATTAAGAGATGGGATCTTGCTACGTTGCCCAGGCTGTAGTGCTGTGGCTATTCACAGGCATGGTCATAGCTCACTACTGTCTTGAACTCCTGGGCTCAAGCCATCCTCTTACCTCAGCCTCCCATGTAGCAGGGACTACAGGTGCCTGTGACCACATCTAGTTTTCCAGTGGGTTTTAAAATGACCTAAGTGTTTGAGGAGAGGAACAGGCTGGCACTGAGAGGCATGACTAAATTGTGAGCCCTCCTTGAGGACTGGAGCTGTGTCT…	110205930	110206450
P23	ctg_29077	5.38451	0.0007415	3.05303	1.64045e-05		AC011523.2	contiguous	GACAGGCAGAAAGGTAAGAGAGCCATGGATAATTGTCTCCTAACACCATTCAGTTCATGCTCTCGATGCTTCCCTACAGGATAATCTCAGGCTTCCCAAC	-	chr19	51345281	51345380	GAACAAACATGCTCTGATGCTCTAGAGAAACATCCATAAAAAGACAATCTGGAACTCAAAAGTGGCTAATACCTTTTTCAGGAGACAGGCAGAAAGGTAAGAGAGCCATGGATAATTGTCTCCTAACACCATTCAGTTCATGCTCTCGATGCTTCCCTACAGGATAATCTCAGGCTTCCCAACCAGGCATTCAAAGTGCAGGCATTTGGTCTGGGATACAAAACCCAGCCTCAGTTTACCTGGTTTTTTTGTTTGCTTGTTTGTTTGTTTTTGAGACAGAGTCTCA	51345178	51345463
RPL11	-	-	-	-	-	RPL11	none	-	ACATCGATCTGGGTATCAAATATGACCCAAGCATTGGTATCTACGGCCTGGACTTCTATGTGGTGCTGGGTAGGCCAGGTTTCAGCATCGCAGACAAGAA	+	chr1	24021220	24022325		-	-
GAPDH	-	-	-	-	-	GAPDH	none	-	CACTCCTCCACCTTTGACGCTGGGGCTGGCATTGCCCTCAACGACCACTTTGTCAAGCTCATTTCCTGGTATGACAACGAATTTGGCTACAGCAACAGGG	+	chr12	6647095	6647298		-	-
NOL7	-	-	-	-	-	NOL7	none	-	GAGGAGCTGTTCATCGAACAGAAGAAAAGAAAACTCCTTCCAGACACTATTTTGGAGAAGTTAACCACAGCTTCACAGACTAACATCAAGAAATCGCCAG	+	chr6	13615981	13616753		-	-
GPATCH3	-	-	-	-	-	GPATCH3	none	-	AGTCTGGGAGCAGCAGTCTTCGTGGCTGGTTCAGGGTGTTTTGTTCCGAGCCTGCCTGCCTGCCGGTTCTATACCTCAGGGGCATTTTTACAAAAAGCCC	-	chr1	27217323	27217422		-	-
ZNF2	-	-	-	-	-	ZNF2	none	-	CACGATGCTTCAGACAAAAAATCAGAAGGATCATTGAGGGAATGCCTTGGAAGGCAAAGTCCTCTGTGTCCTAAATTTGAAGTTCATACACCCAATGGCA	+	chr2	95846871	95846970		-	-
ZNF346	-	-	-	-	-	ZNF346	none	-	TGCTGGAGGGCCAGGAGCCGGACGGGGTGCGCTTTGACCGCGAGAGGGCGCGCCGCCTGTGGGAAGCCGTGTCCGGTGCCCAGCCGGTGGGTAGAGAGGA	+	chr5	176449813	176449912		-	-
