# Supplementary material for: Reference-free transcriptome exploration reveals novel RNAs for prostate cancer diagnosis
Source: Life Sci Alliance. 2019 Nov 15;2(6):e201900449. doi: 10.26508/lsa.201900449 (PMC6858606; doi:10.26508/lsa.201900449)
Supplement: Supplementary file 6 [file LSA-2019-00449_TableS6.xlsx]

## Sheet: Feuil1
Table S6. Clinico-pathological characteristics, risk classification and recurrence status of the prostate specimens used in NanoString (PAIR, Selection Set).
ID_sample	tissue type	TNM	Gleason score (prostatectomy)	recurrence	risk group (naïve classification: TNM, Gleason)
HMN_PC_001	Tumor	pT2c	7 (4 + 3)	no	intermediate risk
HMN_PC_010	Tumor	pT3a	7 (4 + 3)	no	intermediate risk
HMN_PC_013	Tumor	pT2c	6 (3 + 3)	no	low risk
HMN_PC_014	Tumor	pT3a	7 (3 + 4)	yes	intermediate risk
HMN_PC_016	Tumor	pT3b	9 (4 + 5)	yes	high risk
HMN_PC_019	Tumor	pT2c	7 (4 + 3)	yes	intermediate risk
HMN_PC_020	Tumor	pT3a	7 (3 + 4)	no	intermediate risk
HMN_PC_021	Tumor	pT3a	7 (3 + 4)	no	intermediate risk
HMN_PC_022	Tumor	pT3a	8 (4 + 4)	yes	high risk
HMN_PC_023	Tumor	pT3a	7 (4 + 3)	no	intermediate risk
HMN_PC_024	Tumor	pT2c	6 (3 + 3)	no	low risk
HMN_PC_026	Tumor	pT3a	7 (4 + 3)	no	intermediate risk
HMN_PC_027	Tumor	pT2c	7 (3 + 4)	no	low risk
HMN_PC_028	Tumor	pT3a	8 (4 + 4)	yes	high risk
HMN_PC_030	Tumor	pT3b	7 (3 + 4)	no	high risk
HMN_PC_031	Tumor	pT2c	7 (3 + 4)	no	low risk
HMN_PC_032	Tumor	pT2c	7 (4 + 3)	no	intermediate risk
HMN_PC_033	Tumor	pT3a	7 (3 + 4)	no	intermediate risk
HMN_PC_036	Tumor	pT4	7 (4 + 3)	no	high risk
HMN_PC_037	Tumor	pT3a	7 (4 + 3)	yes	intermediate risk
HMN_PC_038	Tumor	pT3b	7 (4 + 3)	no	high risk
HMN_PC_040	Tumor	pT3a	7 (4 + 3)	no	intermediate risk
HMN_PC_041	Tumor	pT3a	7 (4 + 3)	no	intermediate risk
HMN_PC_043	Tumor	pT2c	6 (3 + 3)	no	low risk
HMN_PC_044	Tumor	pT2a	7 (3 + 4)	no	low risk
HMN_PC_045	Tumor	pT2c	7 (4 + 3)	no	intermediate risk
HMN_PC_047	Tumor	pT3b	7 (4 + 3)	no	high risk
HMN_PC_049	Tumor	pT3b	8 (4 + 4)	yes	high risk
HMN_PC_050	Tumor	pT3a	7 (4 + 3)	yes	intermediate risk
HMN_PC_051	Tumor	pT2c	6 (3 + 3)	no	low risk
HMN_PC_052	Tumor	pT3a	8 (4 + 4)	yes	high risk
HMN_PC_056	Tumor	pT3a	8 (4 + 4)	yes	high risk
HMN_PC_057	Tumor	pT3b	8 (4 + 4)	yes	high risk
HMN_PC_058(-)	Normal	-	-	-	-
HMN_PC_059(-)	Normal	-	-	-	-
HMN_PC_060(-)	Normal	-	-	-	-
HMN_PC_063	Tumor	pT3a	8 (4 + 4)	yes	high risk
HMN_PC_066	Tumor	pT3b	7 (4 + 3)	no	high risk
HMN_PC_067	Tumor	pT2a	8 (4 + 4)	yes	high risk
HMN_PC_068	Tumor	pT3b	9 (4 + 5)	yes	high risk
HMN_PC_070	Tumor	pT3a	7 (4 + 3)	yes	intermediate risk
HMN_PC_071	Tumor	pT3b	7 (4 + 3)	yes	high risk
HMN_PC_072	Tumor	pT3b	9 (4 + 5)	no	high risk
HMN_PC_075	Tumor	pT3b	7 (4 + 3)	no	high risk
HMN_PC_076	Tumor	pT2c	8 (4 + 4)	yes	high risk
HMN_PC_077.1	Tumor	pT3a	7 (3 + 4)	no	intermediate risk
HMN_PC_077.2	Tumor	pT3a	7 (4 + 3)	yes	intermediate risk
HMN_PC_078(-)	Normal	-	-	-	-
HMN_PC_081	Tumor	pT3a	7 (3 + 4)	no	intermediate risk
HMN_PC_082	Tumor	pT2c	7 (3 + 4)	no	low risk
HMN_PC_084	Tumor	pT2c	7 (3 + 4)	no	low risk
HMN_PC_085	Tumor	pT3b	7 (4 + 3)	no	high risk
HMN_PC_086(-)	Normal	-	-	-	-
HMN_PC_087	Tumor	pT3a	7 (4 + 3)	no	intermediate risk
HMN_PC_088(-)	Normal	-	-	-	-
HMN_PC_089	Tumor	pT2c	7 (3 + 4)	no	low risk
HMN_PC_092	Tumor	pT3a	7 (4 + 3)	no	intermediate risk
HMN_PC_093(-)	Normal	-	-	-	-
HMN_PC_096	Tumor	pT2a	7 (3 + 4)	no	low risk
HMN_PC_097	Tumor	pT2c	7 (3 + 4)	no	low risk
HMN_PC_099	Tumor	pT2c	6 (3 + 3)	no	low risk
HMN_PC_100	Tumor	pT3a	7 (4 + 3)	no	intermediate risk
HMN_PC_101	Tumor	pT2a	6 (3 + 3)	no	low risk
HMN_PC_102	Tumor	pT2a	6 (3 + 3)	no	low risk
HMN_PC_103	Tumor	pT3a	7 (4 + 3)	no	intermediate risk
HMN_PC_104	Tumor	pT3a	7 (3 + 4)	no	intermediate risk
HMN_PC_105	Tumor	pT2c	7 (3 + 4)	no	low risk
HMN_PC_106	Tumor	pT3a	7 (3 + 4)	no	intermediate risk
HMN_PC_110	Tumor	pT3a	7 (4 + 3)	yes	intermediate risk
HMN_PC_111	Tumor	pT2c	6 (3 + 3)	no	low risk
HMN_PC_113	Tumor	pT2c	7 (3 + 4)	no	low risk
HMN_PC_114	Tumor	pT2b	6 (3 + 3)	no	low risk
HMN_PC_115	Tumor	pT2c	6 (3 + 3)	no	low risk
HMN_PC_117	Tumor	pT3a	6 (3 + 3)	no	intermediate risk
HMN_PC_118	Tumor	pT3a	7 (4 + 3)	no	intermediate risk
HMN_PC_119	Tumor	pT2c	7 (3 + 4)	no	low risk
HMN_PC_121	Tumor	pT3b	8 (4 + 4)	yes	high risk
HMN_PC_124	Tumor	pT3a	8 (4 + 4)	yes	high risk
HMN_PC_125(-)	Normal	-	-	-	-
HMN_PC_126	Tumor	pT4	7 (4 + 3)	yes	high risk
HMN_PC_127	Tumor	pT3a	8 (4 + 4)	yes	high risk
HMN_PC_128	Tumor	pT3a	7 (4 + 3)	yes	intermediate risk
HMN_PC_129	Tumor	pT2c	6 (3 + 3)	no	low risk
HMN_PC_130	Tumor	pT4	6 (3 + 3)	yes	high risk
HMN_PC_131	Tumor	pT3a	8 (4 + 4)	yes	high risk
HMN_PC_134	Tumor	pT3a	8 (4 + 4)	yes	high risk
HMN_PC_135	Tumor	pT3a	7 (4 + 3)	yes	intermediate risk
HMN_PC_137	Tumor	pT3b	9 (4 + 5)	yes	high risk
HMN_PC_138	Tumor	pT2c	7 (3 + 4)	yes	low risk
HMN_PC_139	Tumor	pT3a	6 (3 + 3)	yes	intermediate risk
HMN_PC_140	Tumor	pT3b	7 (4 + 3)	yes	high risk
HMN_PC_141	Tumor	pT3a	8 (4 + 4)	yes	high risk
HMN_PC_142	Tumor	pT3a	8 (4 + 4)	yes	high risk
HMN_PC_143	Tumor	pT3b	8 (4 + 4)	yes	high risk
HMN_PC_145	Tumor	pT3b	9 (4 + 5)	no	high risk
HMN_PC_146	Tumor	pT3b	7 (4 + 3)	yes	high risk
HMN_PC_147	Tumor	pT2c	7 (3 + 4)	yes	low risk
HMN_PC_148	Tumor	pT4	8 (4 + 4)	yes	high risk
HMN_PC_149(-)	Normal	-	-	-	-
HMN_PC_152	Tumor	pT3a	7 (3 + 4)	no	intermediate risk
HMN_PC_153	Tumor	pT3a	6 (3 + 3)	no	intermediate risk
HMN_PC_156	Tumor	pT2c	6 (3 + 3)	no	low risk
HMN_PC_157	Tumor	pT3b	7 (4 + 3)	no	high risk
HMN_PC_158	Tumor	pT2c	7 (3 + 4)	no	low risk
HMN_PC_160	Tumor	pT3a	7 (3 + 4)	no	intermediate risk
HMN_PC_161	Tumor	pT2c	6 (3 + 3)	no	low risk
HMN_PC_162	Tumor	pT3a	7 (4 + 3)	no	intermediate risk
HMN_PC_164	Tumor	pT3a	7 (4 + 3)	no	intermediate risk
HMN_PC_166	Tumor	pT3a	7 (4 + 3)	no	intermediate risk
HMN_PC_167	Tumor	pT2c	8 (4 + 4)	no	high risk
HMN_PC_168	Tumor	pT2a	7 (4 + 3)	yes	intermediate risk
HMN_PC_169	Tumor	pT3a	7 (4 + 3)	no	intermediate risk
HMN_PC_170	Tumor	pT3a	7 (4 + 3)	yes	intermediate risk
HMN_PC_171	Tumor	pT2c	7 (3 + 4)	no	low risk
HMN_PC_172	Tumor	pT3a	8 (4 + 4)	yes	high risk
HMN_PC_173	Tumor	pT2c	6 (3 + 3)	no	low risk
HMN_PC_174	Tumor	pT2c	7 (3 + 4)	no	low risk
HMN_PC_209	Tumor	pT3a	7 (3 + 4)	yes	intermediate risk
HMN_PC_217	Tumor	pT3b	7 (4 + 3)	yes	high risk
HMN_PC_218	Tumor	pT3a	7 (4 + 3)	yes	intermediate risk
HMN_PC_219	Tumor	pT3a	8 (4 + 4)	yes	high risk
HMN_PC_220	Tumor	pT4	8 (4 + 4)	yes	high risk
HMN_PC_221	Tumor	pT3b	7 (4 + 3)	yes	high risk
HMN_PC_222	Tumor	pT2c	8 (3 + 5)	no	high risk
HMN_PC_223	Tumor	pT4	8 (4 + 4)	yes	high risk
HMN_PC_224	Tumor	pT3b	8 (4 + 4)	yes	high risk
HMN_PC_225	Tumor	pT3a	8 (4 + 4)	yes	high risk
HMN_PC_226	Tumor	pT3a	8 (4 + 4)	yes	high risk
HMN_PC_227	Tumor	pT2c	7 (4 + 3)	no	intermediate risk
HMN_PC_228	Tumor	pT2a	6 (3 + 3)	no	low risk
HMN_PC_229	Tumor	pT3a	7 (4 + 3)	no	intermediate risk
HMN_PC_232	Tumor	pT3a	7 (4 + 3)	yes	intermediate risk
HMN_PC_233	Tumor	pT2c	7 (3 + 4)	no	low risk
HMN_PC_234	Tumor	pT3a	8 (4 + 4)	yes	high risk
HMN_PC_235	Tumor	pT2c	6 (3 + 3)	no	low risk
HMN_PC_236	Tumor	pT3a	7 (4 + 3)	no	intermediate risk
HMN_PC_239	Tumor	pT2c	6 (3 + 3)	no	low risk
HMN_PC_241	Tumor	pT3a	7 (4 + 3)	no	intermediate risk
HMN_PC_242	Tumor	pT3a	7 (3 + 4)	no	intermediate risk
HMN_PC_243	Tumor	pT3a	7 (4 + 3)	no	intermediate risk
HMN_PC_244	Tumor	pT4	8 (4 + 4)	yes	high risk
HMN_PC_245	Tumor	pT3a	7 (4 + 3)	yes	intermediate risk
HMN_PC_246	Tumor	pT3a	7 (4 + 3)	no	intermediate risk
HMN_PC_247	Tumor	pT2c	6 (3 + 3)	no	low risk
