# Supplementary material for: Reference-free transcriptome exploration reveals novel RNAs for prostate cancer diagnosis
Source: Life Sci Alliance. 2019 Nov 15;2(6):e201900449. doi: 10.26508/lsa.201900449 (PMC6858606; doi:10.26508/lsa.201900449)
Supplement: Supplementary file 12 [file LSA-2019-00449_TableS12.xlsx]

## Sheet: tumor metrics
Table S12. Mean and Fold Change expression of PCA3, DE-kupl contigs and housekeeping genes in low-risk (LR) and high-risk (HR) tumors and recurrence negative (NO) and positive (YES) specimens of the PAIR cohort (Selection Set).
probe_ID	contig_ID	mean_LR	mean_HR	log2FC	FC, HRvsLR	wilcoxon_pvalue	mean_NO	mean_yYES	log2FC	FC, YESvsNO	wilcoxon_pvalue
P2	ctg_28650	0.73244	1.30711	0.835603	1.7846	6.084e-05	0.875762	1.28047	0.548064	1.46212	0.0005995
P12	ctg_2815	1.53763	1.83055	0.251576	1.19051	0.1807	1.41141	1.90005	0.428901	1.34621	0.01176
P21	ctg_23999	1.86491	1.81315	-0.0406089	0.972244	0.8728	1.55773	2.0533	0.398501	1.31814	0.4463
P18	ctg_105149	1.4103	1.67654	0.249486	1.18878	0.561	1.3585	1.7436	0.360052	1.28347	0.3107
P6	ctg_111158	1.50369	2.66247	0.824262	1.77063	2.444e-05	1.95186	2.49637	0.354984	1.27897	0.001494
P10	ctg_25348	0.493967	0.673984	0.448299	1.36443	0.02592	0.518615	0.643806	0.311962	1.2414	0.1015
P1	ctg_17297	5.47189	7.9025	0.53027	1.4442	0.1198	6.5983	7.83923	0.248618	1.18807	0.2414
P5	ctg_123090	0.382182	0.371699	-0.0401256	0.97257	0.6136	0.356317	0.410264	0.203389	1.1514	0.1579
P14	ctg_61528	1.53989	1.46046	-0.0764027	0.94842	0.8746	1.35104	1.55177	0.199843	1.14857	0.4638
P16	ctg_111348	1.65348	2.53109	0.614255	1.53077	0.02326	2.04911	2.29574	0.163964	1.12036	0.2414
P17	ctg_36195	0.25653	0.264309	0.0430976	1.03032	0.1493	0.229929	0.248675	0.113072	1.08153	0.1079
P7	ctg_117356	3.78074	4.18572	0.146806	1.10712	0.7422	4.00918	4.09566	0.0307904	1.02157	0.7389
P9	ctg_9446	1.93031	1.78147	-0.115757	0.922898	0.8169	1.9215	1.91578	-0.00430073	0.997023	0.2983
P19	ctg_61472	2.05525	2.35187	0.194493	1.14432	0.6067	2.27717	2.25211	-0.0159669	0.988994	0.7956
P4	ctg_63866	1.08775	0.985205	-0.142848	0.905729	0.9855	1.1903	1.1249	-0.0815232	0.945059	0.6955
P15	ctg_512	1.1622	1.12458	-0.047475	0.967628	0.5072	1.13588	1.07236	-0.0830205	0.944079	0.7403
P20	ctg_44030	4.98214	3.86791	-0.36521	0.776356	0.968	4.271	4.0281	-0.0844747	0.943128	0.7655
P23	ctg_29077	1.73358	1.61611	-0.101226	0.932241	0.482	1.6734	1.49499	-0.162644	0.893386	0.667
P22	ctg_119680	0.205377	0.17265	-0.250422	0.84065	0.867	0.186582	0.166576	-0.16363	0.892776	0.8431
P3	ctg_57223	1.56674	1.38682	-0.175978	0.885167	0.5	1.62913	1.4184	-0.199837	0.870649	0.4903
P13	ctg_37852	7.07605	4.90432	-0.52889	0.693088	0.9457	6.31158	5.29991	-0.252035	0.839711	0.9742
P11	ctg_104447	1.92268	0.961528	-0.99972	0.500097	0.9984	1.55247	1.18913	-0.384662	0.765958	0.9619
P8	ctg_73782	3.22641	1.99909	-0.690583	0.619603	0.9996	3.42394	2.47463	-0.468442	0.722745	0.9966
PCA3	-	18.0003	14.5447	-0.307522	0.808029	0.973	17.1879	13.4986	-0.348585	0.785354	0.9928
GAPDH	-	171.614	202.584	0.239358	1.18047	0.003484	172.42	196.582	0.189206	1.14014	0.01022
GPATCH3	-	1.19086	1.21924	0.0339755	1.02383	0.224	1.22965	1.20282	-0.0318257	0.978182	0.7374
NOL7	-	15.7801	16.9264	0.101172	1.07264	0.04579	16.5031	16.0552	-0.0396966	0.97286	0.6426
RPL11	-	274.853	272.742	-0.011125	0.992318	0.6643	273.777	254.033	-0.107981	0.927886	0.7854
ZNF2	-	1.00443	0.992849	-0.0167258	0.988474	0.6577	0.983286	1.00109	0.025889	1.01811	0.2983
ZNF346	-	0.804709	0.787909	-0.0304385	0.979123	0.5822	0.787063	0.796088	0.0164483	1.01147	0.2428
